# Supplementary material
Source: PubMed Central journal article supplement (PMC4165626)

# THE LANCET

## **Supplementary appendix**

This appendix formed part of the original submission and has been peer reviewed. We post it as supplied by the authors.

Supplement to: Wang H, Liddell CA, Coates MM, et al. Global, regional, and national levels of neonatal, infant, and under-5 mortality during 1990–2013: a systematic analysis for the Global Burden of Disease Study 2013. *Lancet* 2014; published online May 2. [http://dx.doi.org/10.1016/S0140-6736\(14\)60497-9](http://dx.doi.org/10.1016/S0140-6736(14)60497-9).

# Appendix to Global, regional, and national levels of neonatal, infant and under-5 mortality during 1990-2013: a systematic analysis for the Global Burden of Disease Study 2013

This appendix provides further methodological detail, supplemental tables and figures, and more detailed results for under-5 mortality estimates.

## Table of contents

|                                                                                                                                                                                                                                                                        |     |
|------------------------------------------------------------------------------------------------------------------------------------------------------------------------------------------------------------------------------------------------------------------------|-----|
| Appendix .....                                                                                                                                                                                                                                                         | 2   |
| 1. Data synthesis for child mortality rate analysis: completeness assessment, non-linear hierarchical mixed effects model, spatial-temporal regression and Gaussian Process regression.....                                                                            | 2   |
| 1.1 Under-5 vital registration completeness assessment .....                                                                                                                                                                                                           | 2   |
| 1.2 First stage – Nonlinear hierarchical mixed effects model.....                                                                                                                                                                                                      | 3   |
| 1.3 Data adjustment:.....                                                                                                                                                                                                                                              | 4   |
| 1.4 Spatial-temporal regression for residual smoothing: .....                                                                                                                                                                                                          | 5   |
| 1.5 Gaussian Process Regression .....                                                                                                                                                                                                                                  | 6   |
| 1.6 Variance calculations.....                                                                                                                                                                                                                                         | 7   |
| 1.7. Shocks.....                                                                                                                                                                                                                                                       | 8   |
| 2. Age and sex model to generate mortality .....                                                                                                                                                                                                                       | 8   |
| 3. References .....                                                                                                                                                                                                                                                    | 10  |
| 4. Additional tables and figures .....                                                                                                                                                                                                                                 | 11  |
| Web table 2a. Under-5 mortality rate for five-year intervals from 1970 to 2013 for 188 countries and 21 Global Burden of Disease regions. ....                                                                                                                         | 11  |
| Web table 2b. Numbers of under-5 deaths for five-year intervals from 1970 to 2013 for 188 countries and 21 Global Burden of Disease regions.....                                                                                                                       | 18  |
| Web table 3. Global under-5 mortality deaths from several studies.....                                                                                                                                                                                                 | 25  |
| Web table 4. Data source list of child mortality data sources used in the GBD 2013.....                                                                                                                                                                                | 26  |
| Web table 5. Shapley decomposition analysis of the change in the number of deaths comparing 2013 to 1990 related to changes in income per capita, maternal education, HIV child death rate, births, secular trend, and unexplained factors for 188 GBD countries. .... | 60  |
| Web table 6. Number of years with data in each decade by country.....                                                                                                                                                                                                  | 70  |
| Web figure 1. Under-5 mortality rate for 188 countries.....                                                                                                                                                                                                            | 75  |
| Web figure 2. Regional rate of change in under-5 mortality rate, 1970-2013.....                                                                                                                                                                                        | 264 |

## Appendix

In analyzing child mortality rates for the Global Burden of Diseases, Injuries, and Risk Factors Study 2013 (GBD 2013) we employ a methodology based on that of Rajaratnam et al.,<sup>1</sup> Lozano et al.,<sup>2</sup> and Wang et al.<sup>3</sup> We have made the following important improvements:

1. Incorporation of data bias adjustment into the modeling process. We estimate source specific bias based on data type specific fixed effects and random effects by source as explained in detail below. By estimating and removing such biases from raw child mortality data, we are able to avoid implausible estimated levels and trends due to sources for different periods with different levels of non-sampling variance.
2. Improvement in estimating the empirical relationships between child mortality rate, income, maternal education and HIV/AIDS. The empirical relationship between child mortality rate and other covariates is a crucial component in generating the mean trend, or prior, for the Gaussian process regression (GPR). In GBD 2013, we employ a nonlinear hierarchical mixed effects model that reflects the theoretical and demographic relationship between child mortality and other covariates, especially the crude death rate from HIV/AIDS in children under-5.
3. Improving estimates of child mortality rate in neonatal periods under the impact of HIV/AIDS. As HIV/AIDS has little impact on the child mortality rate in early neonatal and late neonatal age groups, we improve on the methodology used by GBD 2010 to reflect the changing fraction of under-5 mortality occurring in the neonatal age group.

The steps in generating mortality rate and numbers of death by child age groups are illustrated in Figure 1. We provide a short description here regarding data synthesis using raw child mortality rate estimates from censuses, vital registration systems, sample registration systems, complete and summary birth histories from survey sources and the age and sex model where we estimate mortality rate for early neonatal, late neonatal, postneonatal, and childhood mortality rates using the estimated child mortality rate from data synthesis step.

### 1. Data synthesis for child mortality rate analysis: completeness assessment, non-linear hierarchical mixed effects model, spatial-temporal regression and Gaussian Process regression

#### 1.1 Under-5 vital registration completeness assessment

Vital registration (VR) systems often do not capture all deaths in a country. We use a simple linear regression of  $\log_{10}({}_5q_0)$  on year, with a binary indicator variable for  ${}_5q_0$  estimates derived from VR systems (as described in Equation 1) to assess whether a vital registration system is significantly different from estimates provided by survey sources. If the coefficient for the VR indicator variable is statistically significant at the .05  $\alpha$ -level, we deem the VR system to be biased. Biased VR systems are adjusted upward in a later step.

$$\log_{10}({}_5q_0)_t = \alpha + \beta_1 \cdot t + \beta_2 \cdot I_{VR} + \xi_t \quad 1$$

where:  $t$  is time (a continuous variable);

$I_{VR}$  is an indicator for child mortality rate ( ${}_5q_0$ ) estimates derived from VR systems;

$\xi_t$  is an error term.

## 1.2 First stage – Nonlinear hierarchical mixed effects model

In this stage, we use a nonlinear mixed effects regression to estimate data bias of non-VR child mortality data and provide first stage predictions.

The nonlinear mixed effects regression model is

$${}_5m_{0cys} = \exp[(\beta_1 + \gamma_{1c}) * \log(LDI_{cy}) + (\beta_2 + \gamma_{2c}) * education_{cy} + \gamma_c + \gamma_{cs} + \alpha_t] + \beta_3 * HIV_{cy} + \varepsilon_{cys} \quad 2$$

where  $c$  is country,  $y$  is year,  $s$  is source, and  $t$  is source type; each source was categorized into one of 16 source types across all countries, as listed in Table 1. This formulation is used because the relationship between  ${}_5m_{0cys}$  and income and education is linear in log space but linear with HIV mortality in normal space.

Additionally,

${}_5m_0$  is central mortality rate in the under-5 age group

$LDI$  is lagged distributed income per capita

$education$  is mean years of education for women of reproductive age (15-49 years)

$HIV$  is the estimated death rate due to HIV in age group 0-4

$\gamma_{1c}$  and  $\gamma_{2c}$  are random slope by country

$\gamma_c$  is a random effect by country

$\gamma_{cs}$  is a random effect by source nested within country

$\alpha$  is a source type fixed effects across countries

$\beta_i$  is a fixed covariate coefficient

$\varepsilon$  is the residual

*Web table 1. Source types used in child mortality bias correction*

**Data Source Type**

|                                                                                   |
|-----------------------------------------------------------------------------------|
| <b>Complete Birth History-Demographic and Health Survey</b>                       |
| <b>Complete Birth History-AIDS Indicator Survey and Malaria Indicators Survey</b> |
| <b>Complete Birth History-World Fertility Survey</b>                              |
| <b>Complete Birth History-Multiple Indicator Cluster Survey</b>                   |
| <b>Complete Birth History-Other survey Series</b>                                 |
| <b>Summary Birth History-Demographic and Health Survey</b>                        |
| <b>Summary Birth History-Multiple Indicator Cluster Survey</b>                    |
| <b>Summary Birth History-Other survey series</b>                                  |
| <b>Summary Birth History-AIDS Indicator Survey and Malaria Indicators Survey</b>  |
| <b>Summary Birth History-Census</b>                                               |
| <b>Summary Birth History-World Fertility Survey</b>                               |
| <b>Vital Registration/Sample Registration/Surveillance- complete</b>              |
| <b>Vital Registration/Sample Registration/Surveillance- incomplete</b>            |
| <b>Household Death Recall-Other survey series</b>                                 |
| <b>Household Death Recall-Census</b>                                              |

For each country, we choose a source, or combination of sources, which are believed to be the least biased. If a country has a complete vital registration system, this is the reference source. If a country does not have complete vital registration, but has Demographic and Health Surveys (DHS) estimates from complete birth histories, these are chosen as the reference source. If a country has neither of these types of data, or DHS surveys are unreliable based on published assessments, we assign the surveys conducted after 1980, in combination, as the reference (incomplete vital registration data is not included). Additionally, in some countries we choose other surveys as the reference. In certain cases, in-country all-cause mortality experts draw from their familiarity with data quality to help us to choose the reference category. The broad set of collaborators in this study contributed local knowledge to the selection of the least biased survey or set of surveys.

**1.3 Data adjustment:**

Each data source has an associated random effect as well as a source type fixed effect. The sum of these random and fixed effects for the reference sources is the estimated true deviation from the baseline modelled mortality level. In countries with multiple high-quality sources, the mean of the random and fixed effects from these sources is taken as this true deviation. We adjusted all other sources by including these reference values for the random and fixed effects values instead of those estimated for each individual source, as shown below.

$$\begin{aligned}
 &adjusted_5m_{0,cys} \\
 &= \exp[(\beta_1 + \gamma_{1c}) * \log(LDI_{cy}) + (\beta_2 + \gamma_{2c}) * education_{cy} + \gamma_c + \gamma_{ref,c} \\
 &+ \alpha_{ref,c}] + \beta_3 * HIV_{cy} + \epsilon_{cys} \quad 3
 \end{aligned}$$

The exception to the above adjustment is incomplete vital registration data, which is adjusted upwards using a five year rolling mean of the difference between incomplete vital regression and a LOESS of the already-adjusted survey data.

#### 1.4 Spatial-temporal regression for residual smoothing:

The spatial-temporal stage captures the correlation structure in the residuals over time and across countries in the same GBD region. As described by equations 4 and 5 below, these residuals are computed based on the adjusted data from the previous steps and the predicted child mortality. The predicted time series was obtained from the equation below; no random effects or survey type fixed effects are included. This computation is done in  $\text{logit}(s_{q_0})$  space.

$$\text{predicted}_5 m_{0,cy} = \exp[\beta_1 * \log(LDI_{cy}) + \beta_2 * \text{education}_{cy} + \alpha_{\text{intercept}}] + \beta_3 * HIV_{cy} \quad 4$$

$$\text{residual} = \text{logit}(\text{adjusted}_5 q_{0,cys}) - \text{logit}(\text{predicted}_5 q_{0,cy}) \quad 5$$

For this spatial-temporal component, residuals are weighted based on their proximity to the prediction year in space and time. Ninety-nine percent of the weight is on in-country residuals; one percent is on other residuals in the same GBD region. A modified tricube kernel is used to give more weight to data points closer in time. To capture rapid change in countries with major accelerations or decelerations, we compute the spatial-temporal component two ways.

First, we estimate the smoothed residuals using a linear fit to this weighted data in every country-year; this is similar to a LOESS fit to the spatial and temporal residuals. Second, we compute the smoothed residuals using only the space and time weights applied to the residuals. A combination of these two estimates series gives a final estimate of the smoothed residuals. Equation 6 shows that more weight was given to the local linear fit in data-dense countries while in data sparse countries, more weight was given to the weighted average.

$$\text{final smoothed residual} = k * \text{linear estimate} + (1 - k) * \text{weighted average} \quad 6$$

$$\text{where } k = \frac{\text{number of in country data points}}{\text{number of in country data points} + \text{number of country years with no data}}$$

The effect of this weighting function is to follow the data much more closely including accelerations and decelerations when the data is dense.

Finally, the smoothed residuals are added back to predictions using the non-linear mixed effects model without random effects as discussed in the earlier section.

In Web Table 6, we list by country the number of years within each decade for which we have empirical estimates of under-5 mortality rates. The impact of spatio-temporal regression is most pronounced in places where there is no empirical data for an extend time period. In such situation, results from spatio-temporal regression largely determine our final estimates of under-5 mortality for the period.

## 1.5 Gaussian Process Regression

The output of the spatial-temporal step is used as the mean function, or prior, for the Gaussian process regression (GPR), which produces a final time series of point estimates, as well as uncertainty intervals.

### 1.5a. Mean, Covariance, and Likelihood

The model for the Gaussian process regression is shown below, where  $\mu_t$  is the true  ${}_5q_0$  at time  $t$ ,  $f(t)$  is the baseline mortality risk, in logit space, and  $S_t$  captures excess mortality due to war and disasters.  $S_t$  is estimated independently of  $f(t)$ .  $M$  and  $C$  describe the Gaussian process, giving the mean and covariance, respectively.

$$\begin{aligned}\mu_t &= \text{logit}^{-1}f(t) + S_t \\ f(t) &\sim \text{GP}(M, C)\end{aligned}\tag{7}$$

The prior distribution of  $f(t)$  can be described in terms of the mean prior—the prior for  $M$ —and the covariance prior—the prior for  $C$ . We utilize the second stage predictions as the mean prior and used a Matern function to describe the covariance prior. The Matern covariance function is uniquely flexible; its equation is

$$M(t, t') = \sigma^2 \frac{2^{1-\nu}}{\Gamma(\nu)} \left( \frac{d(t, t')\sqrt{2\nu}}{l} \right)^\nu K_\nu \left( \frac{d(t, t')\sqrt{2\nu}}{l} \right)\tag{8}$$

where  $t$  is time,  $d(\cdot, \cdot)$  is a distance function, and  $\sigma^2$ ,  $\nu$ ,  $l$ , and  $K_\nu$  are hyperparameters that allow the covariance to model trends with a variety of smoothness characteristics.  $\nu$  is the differentiability of the estimates,  $l$  corresponds to how correlated the estimates are over time,  $K_\nu$  is the Bessel function, and  $\sigma^2$  is the marginal variance. In this application, we set  $\nu$  to 2 for most countries, and to 0.8 for countries with only vital registration data that are not in the Caribbean or Oceania. We use cross-validation, described in detail below, to choose values of  $\sigma^2$  and  $l$  specific to each region.

The likelihood describes the probability of observing the data given a particular set of parameters. As shown in equation 8, we use a normal model for describing the probability of observing a particular value of  $\text{logit}({}_5q_0)$  where the mean is given by  $f(t)$  and the variance by  $V_t$ , the data variance.

$$\text{logit}({}_5q_{0t}) \sim \text{Normal}(f(t), V_t)\tag{9}$$

### 1.5b. Hyperparameter selection through cross-validation

For cross-validation to select GPR hyperparameters  $\sigma^2$  and  $l$ , data are divided as follows: for each region, a number  $X$  between 10 and 20 was sampled and the most recent  $X$  years of data in that region are assigned to the testing set. Then a number  $X$  between 5 and 10 is sampled, a country from within the region is sampled, and a year where there is data in that country is sampled. All data within  $X$  years of the selected year in the selected country are assigned to the testing set. This is repeated as many times as there are countries in the region; because iterations of this procedure are independent, the data selected for the testing set may overlap. Any data that are not selected for the testing set are included in the training set.

For each testing and training division, the second stage model is fit on the bias-adjusted training data. Then, the third stage model is also fit on the bias-adjusted training data using each combination of scale and squared amplitude values tested for a total of 25 sets of predictions. The testing data are matched to the predictions in the

corresponding country and year for each of the 25 sets of predictions. For each match we calculate the absolute relative error of the prediction compared to the empirical estimate in the testing set. We also classify each bias-adjusted estimate in the testing set as being covered or not covered by each corresponding prediction uncertainty interval.

Once this procedure has been carried out for all 100 testing and training divisions of the data we calculate the mean absolute relative error and the mean coverage for each combination of GPR parameters across all 100 sets of predictions. The ideal set of parameters would produce estimates with low mean absolute relative error and mean coverage close to 0.95. We use the function described in equation 8 to calculate a loss metric which incorporates both the coverage and the absolute relative error into a single measure to assess performance. Parameter combinations with lower values of this loss metric are considered preferable.

$$\text{Loss} = \begin{cases} \text{if coverage} \leq 0.95: (0.95 - \text{coverage})/5 + (\text{absolute relative error}) \\ \text{if coverage} > 0.95: (\text{coverage} - 0.95)/1 + (\text{absolute relative error}) \end{cases} \quad 10$$

The optimal parameters may differ from country to country. To allow for this, we calculated the loss function described in equation 8 separately for each of the 21 GBD geographic regions.

### 1.5c. Final estimates and confidence intervals

Given the mean, covariance, and likelihood above, we use GPR to obtain a posterior distribution of the time series of  $\log_{10}(s_{q_0})$  for each country. We draw 1000 samples from this distribution, and take the mean, 2.5<sup>th</sup>, and 97.5<sup>th</sup> percentile as our best estimate, upper, and lower confidence intervals, respectively. The Gaussian process regression is implemented in Python's PyMC package.

## 1.6 Variance calculations

As mentioned in the previous section, data variance is a key factor in generating the uncertainty interval of child mortality rate. Data variance is calculated for each empirical observation of  $s_{q_0}$  and incorporated both sampling and non-sampling biases. The method for calculating the data variance depends on the type of data:

1. For estimates derived from complete vital registration data we assume that there is no non-sampling variance and include only sampling variance as computed from a binomial model. We set  $N$  equal to the national population aged 0 to 5 years and  $p$  equal to the mortality rate,  $s_{m_0}$ . We calculate the variance of  $s_{m_0}$  from  $p(1-p)/N$  and then transform this to the variance of  $\log_{10}(s_{q_0})$  using the delta method.<sup>4</sup>
2. For estimates derived from incomplete vital registration data, we want to include not only sampling variance but also the non-sampling variance that arises from uncertainty in the completeness estimate. For these data, the total data variance is given by the sum of the sampling variance (calculated as for complete vital registration data) and the variance of the completeness estimate;
3. For estimates derived from complete birth histories we generate 1000 simulations of  $s_{q_0}$ , convert these estimates into  $\log_{10}$  space and calculate the sampling variance from these 1,000 simulations;
4. For estimates derived from summary birth histories, we use the standard error from the mean residuals;
5. For estimates not covered under the above four calculations the missing data variance is determined as the maximum standard error from non-VR points in the country, if the data variance is still missing it is calculated as the maximum standard error from non-VR data in the GBD region.



6. Finally, for each source type, we calculate the within-source-type variance of the source-specific random effect. This additional non-sampling variance is then converted to  $\log_{10}$  space and added to the variance as calculated above for all data points not classified as complete vital registration.

### 1.7. Shocks

We compile a database of child deaths due to conflict and natural disaster from three sources: the Uppsala Conflict Data Program (UCDP), the International Institute for Strategic Studies (IISS), and the EM-DAT database published by The Center for Research on the Epidemiology of Disasters. The conflicts we analyze include both domestic and international as largely defined by the two main data sources we are using: UCDP and IISS. For natural disasters, we include major forces of nature: earthquake, hurricane, and flood.

After compiling a database of all-age war and disaster deaths, we use the methods described by Lozano et al.<sup>4</sup> to split deaths into age groups, creating 1000 simulations. For countries with shocks, the calculated shocks under-five mortality rate are added to the GPR estimates, which are “shock-free” by definition, at the simulation level. Here we employ the simple mathematical relationship between all-cause mortality rate and cause specific mortality rate, that is, the sum of mortality rate due to shocks and from non-shock causes are all-cause mortality rate. The mean, 2.5th, and 97.5th percentiles of the simulations are then used as final estimates and confidence intervals. In countries without shocks, GPR results are presented as final estimates.

## 2. Age and sex model to generate mortality

The process used to break down under-5 mortality into age- and sex- specific groups has been previously described.<sup>2</sup> The current process is largely similar but has been modified to improve the accuracy of predictions for countries affected by HIV/AIDS. As pointed out by Bradshaw et al., neonatal mortality tends to be overestimated if the all-cause child mortality rate is used as the only predictor.<sup>5</sup> We use a two-stage modeling process to generate sex-specific estimates of early neonatal (days 0 to 6), late neonatal (days 7 to 27), post-neonatal (the remainder of the first year), and childhood (ages 1 to 4) mortality. First, the ratio of male to female under-5 probability of death is estimated, then age- and sex-specific mortality estimates are generated using this ratio. To fit models to obtain estimates, data from vital registration, sample vital registration, and complete birth histories are converted to mortality risks for specific age groups. Sources have differing levels of age specificity and at least include infant (composed of early neonatal, late neonatal, and post-neonatal) and child mortality, but can include all 4 smaller age groups. The two models – first the sex model, then the age-specific and sex specific model – are fit on the data.

The sex model predicts the ratio of male probability of death under age 5 ( ${}_5q_0$ ) to female  ${}_5q_0$  for each country  $i$  in region  $j$  in year  $t$ . The data are ordered by observed  ${}_5q_0$ , and categorized into 20 evenly sized bins. Then, the model is fit to the data as described in the equation below.

$$\left( \frac{\text{Male } {}_5q_0}{\text{Female } {}_5q_0} \right)_{jit} = \beta + \gamma_{{}_5q_0 \text{ bin}} + \gamma_j + \gamma_i + \varepsilon_{jit} \quad 9$$

The ratio is predicted by nested country and region random effects  $\gamma_i$  and  $\gamma_j$ , a random effect on the  ${}_5q_0$  bin, and an intercept term,  $\beta$ . A Loess regression is then used to smooth the estimated  $\gamma_{{}_5q_0 \text{ bin}}$  on  ${}_5q_0$ , creating a continuous  $\gamma'_{{}_5q_0 \text{ bin}}$ . Then, the equation below is used to predict the ratio of male to female  ${}_5q_0$ :

$$\left(\frac{\text{Male } {}_5q_0}{\text{Female } {}_5q_0}\right)_{jit} = \hat{\beta} + \gamma' {}_5q_0 \text{ bin}({}_5q_{0jit}) + \hat{\gamma}_j + \hat{\gamma}_i \quad 10$$

The male and female  ${}_5q_0$  values are found using the system of equations that includes the model above and equation below, where  $r_{\text{birth}}$  is the sex-ratio at birth.

$${}_5q_0 = \left(\frac{1}{1+r_{\text{birth}}}\right) * (\text{female } {}_5q_0) + \left(\frac{r_{\text{birth}}}{1+r_{\text{birth}}}\right) * (\text{male } {}_5q_0) \quad 11$$

Age-specific models are then fit for each age group on sex-specific data. A separate model is fit for each age group yielding five models for each sex: early neonatal, late neonatal, postneonatal, infant, and child. The log of the probability that an under-5 death occurs in a given age group is modeled instead of the mortality risk, simplifying the scaling process and restricting risks to be between 0 and 1. Because evidence suggests HIV has differential effects on different under-5 age groups,<sup>5,6</sup> the crude death rates from HIV/AIDS in the under-5 age group were included in the model. We used crude death rates due to HIV based on the 2013 UNAIDS estimates,<sup>7</sup> updated using Spectrum software.<sup>8</sup> The inclusion of this covariate improves both the fit and prediction of the model in countries with HIV. The functional form of the model is below.

$$\log(\text{Pr}(\text{death at age } y|\text{u5 death})_{jit}) = \beta_1 + \beta_2 * HIV_{it} + \gamma' {}_5q_0 \text{ bin} + \gamma_j + \gamma_i + \varepsilon_{jit} \quad 12$$

Similar to the sex model, the sex-specific age prediction uses  ${}_5q_0$  bins and smoothes the random effect on the bin using  ${}_5q_0$ . The prediction equation for age  $y$  in country in region  $j$  at time  $t$  is seen below, with nested random effects on country ( $\hat{\gamma}_i$ ) and region ( $\hat{\gamma}_j$ ), an intercept term ( $\hat{\beta}_1$ ), a smoothed random effect on  ${}_5q_0$  bin ( $\hat{\gamma}' {}_5q_0 \text{ bin}({}_5q_{0jit})$ ), and a coefficient on the under-5 crude death rate from HIV ( $\hat{\beta}_2$ ):

$$\log(\text{Pr}(\text{death at age } y|\text{u5 death})_{jit}) = \hat{\beta}_1 + \hat{\beta}_2 * HIV_{it} + \hat{\gamma}' {}_5q_0 \text{ bin}({}_5q_{0jit}) + \hat{\gamma}_j + \hat{\gamma}_i \quad 13$$

Once the sex and age models are fit, they are applied to the  ${}_5q_0$  estimates derived from our  ${}_5q_0$  modeling process to estimate death risks for each age and sex. Uncertainty is accounted for in two ways. Uncertainty in  ${}_5q_0$  is carried through from the GPR process by making predictions on the 1000 simulations produced by GPR for each country-year. Further, the predictions are made by simulations of this model which are generated using uncertainty around each term of the sex and age models.

The predictions of the log of the conditional probability of death are then transformed to mortality risks and scaled to create consistency between the age and sex predictions and the  ${}_5q_0$  predictions from GPR.

### 3. References

- 1 Rajaratnam JK, Marcus JR, Flaxman AD, *et al.* Neonatal, postneonatal, childhood, and under-5 mortality for 187 countries, 1970–2010: a systematic analysis of progress towards Millennium Development Goal 4. *The Lancet* 2010; **375**: 1988–2008.
- 2 Lozano R, Wang H, Foreman KJ, *et al.* Progress towards Millennium Development Goals 4 and 5 on maternal and child mortality: an updated systematic analysis. *The Lancet* 2011; **378**: 1139–65.
- 3 Wang H, Dwyer-Lindgren L, Lofgren KT, *et al.* Age-specific and sex-specific mortality in 187 countries, 1970–2010: a systematic analysis for the Global Burden of Disease Study 2010. *The Lancet* 2012; **380**: 2071–94.
- 4 Lozano R, Naghavi M, Foreman K, *et al.* Global and regional mortality from 235 causes of death for 20 age groups in 1990 and 2010: a systematic analysis for the Global Burden of Disease Study 2010. *The Lancet* 2012; **380**: 2095–128.
- 5 Kerber KJ, Lawn JE, Johnson LF, *et al.* South African child deaths 1990–2011: have HIV services reversed the trend enough to meet Millennium Development Goal 4? *AIDS Oct 23 2013* 2013; **27**: 2637–48.
- 6 Marston M, Becquet R, Zaba B, *et al.* Net survival of perinatally and postnatally HIV-infected children: a pooled analysis of individual data from sub-Saharan Africa. *Int J Epidemiol* 2011; **40**: 385–96.
- 7 UNAIDS. Global report: UNAIDS report on the global AIDS epidemic 2013. , Joint United Nations Programme on HIV/AIDS (UNAIDS), 2013. [http://www.unaids.org/en/media/unaids/contentassets/documents/epidemiology/2013/gr2013/UNAIDS\\_Global\\_Report\\_2013\\_en.pdf](http://www.unaids.org/en/media/unaids/contentassets/documents/epidemiology/2013/gr2013/UNAIDS_Global_Report_2013_en.pdf).
- 8 Stover J, McKinnon R, Winfrey B. Spectrum: a model platform for linking maternal and child survival interventions with AIDS, family planning and demographic projections. *Int J Epidemiol* 2010; **39**: i7–i10.

## 4. Additional tables and figures

**Web table 2a. Under-5 mortality rate for five-year intervals from 1970 to 2013 for 188 countries and 21 Global Burden of Disease regions.**

| <b>WebTable 2a. Under-5 mortality rate for five-year intervals from 1970 to 2013 for 188 countries and 21 Global Burden of Disease regions</b> |                                            |                        |                        |                        |                      |
|------------------------------------------------------------------------------------------------------------------------------------------------|--------------------------------------------|------------------------|------------------------|------------------------|----------------------|
|                                                                                                                                                | <b>Under-5 Deaths per 1000 live births</b> |                        |                        |                        |                      |
|                                                                                                                                                | 1970                                       | 1980                   | 1990                   | 2000                   | 2013                 |
| Global                                                                                                                                         | 142.6<br>(138.5-146.9)                     | 110.0<br>(108.1-111.7) | 84.6<br>(83.3-85.9)    | 69.4<br>(68.5-70.4)    | 44.0<br>(41.9-46.3)  |
| Asia Pacific, High-income                                                                                                                      | 29.2<br>(27.6-30.6)                        | 14.3<br>(12.6-16.4)    | 7.2<br>(6.6-8.1)       | 5.4<br>(5.3-5.5)       | 3.2<br>(2.7-3.8)     |
| Brunei                                                                                                                                         | 54.6<br>(52.0-57.4)                        | 19.3<br>(17.8-21.1)    | 10.2<br>(9.3-11.1)     | 9.1<br>(8.3-9.8)       | 8.2<br>(6.8-10.0)    |
| Japan                                                                                                                                          | 17.4<br>(17.2-17.5)                        | 9.8<br>(9.6-9.9)       | 6.1<br>(5.9-6.2)       | 4.5<br>(4.4-4.6)       | 3.0<br>(2.3-3.8)     |
| Singapore                                                                                                                                      | 26.9<br>(25.7-28.2)                        | 14.7<br>(13.9-15.6)    | 7.7<br>(7.2-8.3)       | 3.6<br>(3.3-4.0)       | 2.3<br>(1.8-2.9)     |
| South Korea                                                                                                                                    | 51.0<br>(46.4-55.3)                        | 23.5<br>(18.3-30.0)    | 9.6<br>(7.5-12.3)      | 7.1<br>(7.0-7.2)       | 3.7<br>(3.4-4.1)     |
| Asia, Central                                                                                                                                  | 113.7<br>(107.3-120.0)                     | 82.8<br>(79.3-86.7)    | 62.7<br>(60.8-64.6)    | 53.6<br>(51.8-55.8)    | 34.0<br>(31.6-36.5)  |
| Armenia                                                                                                                                        | 113.8<br>(104.0-125.8)                     | 71.3<br>(66.2-76.1)    | 48.3<br>(45.5-51.6)    | 31.9<br>(29.8-34.4)    | 16.8<br>(15.2-18.7)  |
| Azerbaijan                                                                                                                                     | 131.9<br>(120.4-144.1)                     | 95.5<br>(87.0-103.7)   | 78.0<br>(73.5-83.1)    | 63.7<br>(59.1-68.2)    | 35.1<br>(31.8-39.0)  |
| Georgia                                                                                                                                        | 85.7<br>(77.6-95.0)                        | 53.4<br>(48.7-58.7)    | 40.3<br>(37.0-44.0)    | 35.4<br>(32.6-38.5)    | 21.1<br>(19.0-23.4)  |
| Kazakhstan                                                                                                                                     | 63.9<br>(58.3-70.3)                        | 51.8<br>(48.5-55.9)    | 40.0<br>(37.5-42.5)    | 35.7<br>(32.8-38.9)    | 22.8<br>(20.6-25.3)  |
| Kyrgyzstan                                                                                                                                     | 149.3<br>(136.4-161.6)                     | 104.7<br>(98.3-112.4)  | 71.9<br>(68.2-76.5)    | 49.4<br>(46.1-53.0)    | 29.6<br>(27.0-32.2)  |
| Mongolia                                                                                                                                       | 158.3<br>(145.5-172.1)                     | 123.3<br>(114.1-132.8) | 96.5<br>(90.7-102.8)   | 64.7<br>(60.0-69.9)    | 42.9<br>(38.8-47.5)  |
| Tajikistan                                                                                                                                     | 178.9<br>(163.6-195.3)                     | 126.0<br>(116.7-135.9) | 94.5<br>(89.3-99.9)    | 73.9<br>(69.9-78.6)    | 41.7<br>(37.9-45.2)  |
| Turkmenistan                                                                                                                                   | 221.7<br>(204.2-241.5)                     | 140.3<br>(127.3-154.1) | 98.4<br>(90.1-107.5)   | 79.9<br>(72.8-87.0)    | 52.3<br>(46.7-58.9)  |
| Uzbekistan                                                                                                                                     | 106.0<br>(95.8-115.8)                      | 77.1<br>(72.5-82.4)    | 55.6<br>(52.6-59.1)    | 50.6<br>(46.8-54.3)    | 35.9<br>(32.5-39.9)  |
| Asia, East                                                                                                                                     | 135.4<br>(124.2-148.4)                     | 86.1<br>(78.9-93.4)    | 58.2<br>(54.6-62.1)    | 36.5<br>(34.8-38.1)    | 13.0<br>(12.1-13.8)  |
| China                                                                                                                                          | 136.1<br>(124.9-149.6)                     | 87.5<br>(80.1-95.2)    | 59.1<br>(55.4-63.1)    | 36.9<br>(35.2-38.6)    | 13.0<br>(12.0-13.8)  |
| North Korea                                                                                                                                    | 209.4<br>(172.0-244.8)                     | 105.7<br>(85.6-129.9)  | 54.5<br>(43.7-66.7)    | 44.3<br>(36.5-53.2)    | 21.2<br>(17.2-26.3)  |
| Taiwan (Province of China)                                                                                                                     | 27.0<br>(26.5-27.5)                        | 15.1<br>(14.8-15.5)    | 8.6<br>(8.4-8.9)       | 8.5<br>(8.3-8.7)       | 6.7<br>(6.1-7.3)     |
| Asia, South                                                                                                                                    | 205.0<br>(200.7-209.8)                     | 157.6<br>(154.2-160.7) | 117.7<br>(115.5-119.9) | 87.7<br>(85.7-89.7)    | 52.6<br>(48.3-58.0)  |
| Afghanistan                                                                                                                                    | 296.7<br>(271.7-326.4)                     | 233.7<br>(215.5-253.7) | 169.4<br>(159.2-181.3) | 143.3<br>(134.1-151.2) | 90.2<br>(81.6-100.0) |
| Bangladesh                                                                                                                                     | 241.0<br>(233.8-247.9)                     | 189.6<br>(185.5-193.3) | 135.1<br>(132.2-138.3) | 84.0<br>(81.7-86.5)    | 40.8<br>(36.9-45.4)  |
| Bhutan                                                                                                                                         | 229.6<br>(197.5-261.6)                     | 193.0<br>(173.9-213.1) | 135.0<br>(124.3-145.0) | 89.4<br>(83.0-96.6)    | 47.5<br>(39.9-57.0)  |
| India                                                                                                                                          | 200.9<br>(195.5-207.0)                     | 152.7<br>(148.1-156.5) | 114.5<br>(111.4-117.2) | 84.9<br>(82.4-87.6)    | 48.8<br>(43.1-56.4)  |
| Nepal                                                                                                                                          | 272.1<br>(262.3-281.6)                     | 220.9<br>(214.9-227.0) | 143.7<br>(139.7-148.1) | 83.4<br>(80.5-86.3)    | 37.7<br>(33.9-42.1)  |

|                                  |                        |                        |                        |                        |                     |
|----------------------------------|------------------------|------------------------|------------------------|------------------------|---------------------|
| Pakistan                         | 167.8<br>(161.4-173.7) | 135.4<br>(130.9-139.7) | 111.3<br>(108.1-114.9) | 96.3<br>(93.3-99.1)    | 75.8<br>(70.1-82.5) |
| Asia, Southeast                  | 134.8<br>(129.7-139.7) | 97.8<br>(94.8-100.8)   | 68.9<br>(66.8-71.0)    | 45.6<br>(44.0-47.3)    | 27.2<br>(24.5-30.4) |
| Burma                            | 189.7<br>(167.6-214.5) | 134.6<br>(118.1-151.9) | 106.9<br>(94.0-121.5)  | 75.4<br>(64.6-87.2)    | 37.1<br>(31.6-43.7) |
| Cambodia                         | 187.8<br>(168.5-209.2) | 154.9<br>(141.5-167.7) | 115.8<br>(110.5-121.7) | 101.1<br>(95.9-106.6)  | 43.2<br>(37.4-49.5) |
| Indonesia                        | 168.3<br>(161.7-176.2) | 124.1<br>(119.2-129.1) | 85.8<br>(82.7-89.5)    | 53.7<br>(51.2-56.5)    | 31.5<br>(28.1-35.6) |
| Laos                             | 236.6<br>(206.1-268.6) | 199.6<br>(178.2-223.3) | 157.8<br>(145.9-171.5) | 121.8<br>(111.5-131.6) | 61.3<br>(52.8-69.4) |
| Malaysia                         | 55.4<br>(54.7-56.2)    | 32.0<br>(28.4-36.5)    | 16.8<br>(16.5-17.2)    | 9.1<br>(8.9-9.4)       | 6.5<br>(5.5-7.6)    |
| Maldives                         | 202.5<br>(179.7-226.4) | 128.6<br>(116.6-140.7) | 71.5<br>(65.6-77.8)    | 38.9<br>(35.4-42.6)    | 16.3<br>(13.5-19.7) |
| Philippines                      | 88.0<br>(82.1-94.8)    | 78.2<br>(73.5-83.2)    | 53.9<br>(50.7-57.3)    | 38.7<br>(35.9-41.8)    | 27.3<br>(23.2-32.2) |
| Sri Lanka                        | 67.4<br>(66.7-68.1)    | 46.1<br>(45.6-46.7)    | 36.6<br>(35.6-37.4)    | 16.4<br>(16.1-16.8)    | 8.8<br>(7.5-10.5)   |
| Thailand                         | 88.3<br>(82.2-93.9)    | 51.8<br>(47.9-55.9)    | 31.1<br>(26.8-35.1)    | 19.0<br>(16.3-22.3)    | 11.0<br>(9.3-13.2)  |
| Timor-Leste                      | 285.5<br>(259.6-311.2) | 235.5<br>(219.7-251.8) | 151.6<br>(142.9-159.4) | 108.3<br>(101.9-114.0) | 38.8<br>(33.3-45.3) |
| Vietnam                          | 110.9<br>(98.0-124.9)  | 68.1<br>(63.0-73.3)    | 47.5<br>(44.5-50.9)    | 28.8<br>(26.0-31.7)    | 18.6<br>(15.8-21.9) |
| Australasia                      | 21.7<br>(21.2-22.1)    | 13.3<br>(12.9-13.7)    | 9.9<br>(9.6-10.1)      | 6.5<br>(6.3-6.8)       | 4.6<br>(3.9-5.4)    |
| Australia                        | 22.0<br>(21.5-22.5)    | 12.8<br>(12.4-13.3)    | 9.5<br>(9.2-9.9)       | 6.3<br>(6.0-6.6)       | 4.4<br>(3.7-5.1)    |
| New Zealand                      | 20.5<br>(19.5-21.4)    | 15.2<br>(14.4-16.0)    | 11.2<br>(10.6-11.8)    | 7.6<br>(7.1-8.1)       | 5.6<br>(4.7-6.7)    |
| Caribbean                        | 99.2<br>(95.7-102.5)   | 84.4<br>(81.1-87.6)    | 66.2<br>(63.5-69.7)    | 46.7<br>(44.7-48.6)    | 35.5<br>(30.9-41.2) |
| Antigua and Barbuda              | 35.4<br>(23.0-52.7)    | 32.8<br>(16.4-61.4)    | 19.5<br>(10.8-32.7)    | 17.9<br>(11.4-27.1)    | 15.3<br>(6.9-30.9)  |
| Barbados                         | 57.3<br>(37.8-82.2)    | 36.7<br>(21.7-57.3)    | 27.2<br>(14.2-43.2)    | 19.7<br>(11.7-31.7)    | 16.5<br>(7.3-33.5)  |
| Belize                           | 95.9<br>(78.6-115.7)   | 65.5<br>(53.9-77.5)    | 41.0<br>(34.0-48.4)    | 28.1<br>(22.3-34.4)    | 18.6<br>(9.0-35.5)  |
| Cuba                             | 42.0<br>(41.4-42.6)    | 20.1<br>(19.6-20.5)    | 13.7<br>(13.3-14.1)    | 8.4<br>(8.2-8.8)       | 5.7<br>(4.9-6.6)    |
| Dominica                         | 113.2<br>(74.9-164.0)  | 28.5<br>(15.9-45.7)    | 31.1<br>(16.6-54.0)    | 24.8<br>(16.1-37.8)    | 21.8<br>(10.2-42.8) |
| Dominican Republic               | 118.0<br>(111.0-124.7) | 85.7<br>(81.2-89.9)    | 58.5<br>(54.7-61.9)    | 36.5<br>(34.1-39.0)    | 28.8<br>(24.1-34.5) |
| Grenada                          | 67.6<br>(38.8-105.5)   | 53.4<br>(25.9-107.0)   | 28.1<br>(16.0-47.1)    | 20.0<br>(12.8-29.2)    | 13.2<br>(6.1-25.9)  |
| Guyana                           | 73.8<br>(63.4-84.5)    | 57.7<br>(44.5-71.8)    | 50.9<br>(44.3-58.3)    | 33.8<br>(29.2-38.9)    | 36.2<br>(17.2-69.5) |
| Haiti                            | 245.9<br>(231.1-261.3) | 200.3<br>(190.1-211.4) | 146.6<br>(139.6-154.7) | 97.9<br>(92.3-103.4)   | 66.1<br>(56.8-77.6) |
| Jamaica                          | 65.9<br>(56.1-76.8)    | 37.0<br>(27.8-47.8)    | 30.2<br>(22.7-39.6)    | 22.8<br>(16.6-31.1)    | 18.3<br>(8.0-37.6)  |
| Saint Lucia                      | 88.8<br>(50.5-149.6)   | 47.7<br>(28.5-70.9)    | 32.0<br>(18.3-52.6)    | 19.1<br>(12.8-27.3)    | 18.2<br>(8.1-37.1)  |
| Saint Vincent and the Grenadines | 105.9<br>(63.1-158.7)  | 76.5<br>(44.5-119.7)   | 40.1<br>(21.5-69.9)    | 29.4<br>(18.9-41.9)    | 23.6<br>(11.0-46.0) |
| Suriname                         | 65.0<br>(54.7-78.0)    | 58.4<br>(50.6-67.8)    | 50.6<br>(44.5-57.3)    | 43.6<br>(37.8-50.1)    | 38.1<br>(31.8-45.7) |
| The Bahamas                      | 64.1<br>(41.5-93.4)    | 46.7<br>(28.7-71.9)    | 33.8<br>(18.8-52.5)    | 17.0<br>(11.2-25.6)    | 16.5<br>(7.5-32.6)  |
| Trinidad and Tobago              | 52.1<br>(44.8-60.3)    | 38.5<br>(31.8-45.2)    | 27.8<br>(20.1-37.1)    | 29.6<br>(22.6-37.5)    | 22.3<br>(9.9-45.0)  |
| Europe, Central                  | 48.5                   | 29.4                   | 21.2                   | 12.9                   | 6.7                 |

|                        |              |             |             |             |            |
|------------------------|--------------|-------------|-------------|-------------|------------|
|                        | (43-0-57-3)  | (27-0-32-7) | (20-4-22-3) | (12-6-13-2) | (4-9-9-4)  |
| Albania                | 98.5         | 59.8        | 40.2        | 26.8        | 17.9       |
|                        | (53-5-168-1) | (41-8-84-5) | (35-1-45-1) | (22-7-31-6) | (8-6-35-1) |
| Bosnia and Herzegovina | 59.1         | 36.8        | 17.9        | 10.4        | 5.4        |
|                        | (30-5-104-3) | (18-7-64-5) | (17-0-18-7) | (9-7-11-2)  | (3-6-7-9)  |
| Bulgaria               | 32.7         | 23.7        | 18.0        | 17.5        | 9.7        |
|                        | (31-8-33-6)  | (22-8-24-5) | (17-2-18-8) | (16-5-18-4) | (6-8-13-8) |
| Croatia                | 50.9         | 25.6        | 11.8        | 8.5         | 4.6        |
|                        | (25-8-90-9)  | (12-3-45-7) | (10-9-12-6) | (7-7-9-2)   | (3-1-6-6)  |
| Czech Republic         | 22.7         | 18.0        | 12.5        | 5.3         | 3.0        |
|                        | (22-0-23-6)  | (17-4-18-7) | (11-9-13-1) | (4-9-5-7)   | (2-1-4-3)  |
| Hungary                | 39.3         | 24.4        | 16.8        | 10.4        | 5.1        |
|                        | (38-4-40-3)  | (23-7-25-1) | (16-2-17-5) | (9-9-11-0)  | (4-1-6-4)  |
| Macedonia              | 101.1        | 57.3        | 34.4        | 15.3        | 8.0        |
|                        | (52-5-171-7) | (37-9-85-3) | (32-9-36-2) | (14-3-16-6) | (5-3-11-9) |
| Montenegro             | 56.3         | 33.6        | 20.9        | 19.8        | 6.3        |
|                        | (29-1-99-4)  | (17-2-57-3) | (10-6-36-4) | (17-3-22-3) | (3-6-10-5) |
| Poland                 | 37.4         | 24.3        | 17.8        | 9.4         | 5.0        |
|                        | (36-9-37-8)  | (24-0-24-7) | (17-4-18-1) | (9-1-9-6)   | (3-5-7-2)  |
| Romania                | 58.0         | 36.0        | 33.0        | 23.2        | 11.0       |
|                        | (57-3-58-7)  | (35-4-36-5) | (32-4-33-6) | (22-6-23-7) | (6-6-17-7) |
| Serbia                 | 76.3         | 38.4        | 18.8        | 7.5         | 4.9        |
|                        | (37-4-139-2) | (19-0-65-6) | (10-1-30-2) | (7-1-7-9)   | (3-9-6-0)  |
| Slovakia               | 29.6         | 23.5        | 13.9        | 10.0        | 6.7        |
|                        | (28-5-30-7)  | (22-6-24-4) | (13-1-14-7) | (9-3-10-7)  | (4-0-10-8) |
| Slovenia               | 49.3         | 19.5        | 9.8         | 5.5         | 3.6        |
|                        | (24-7-85-4)  | (11-8-30-8) | (8-7-10-9)  | (4-7-6-3)   | (2-1-6-0)  |
| Europe, Eastern        | 35.6         | 30.8        | 22.6        | 19.8        | 9.7        |
|                        | (29-9-42-2)  | (26-2-36-6) | (19-2-26-6) | (19-0-20-6) | (7-7-12-2) |
| Belarus                | 33.7         | 26.2        | 20.2        | 16.0        | 7.6        |
|                        | (25-8-43-0)  | (20-5-32-8) | (15-2-26-1) | (12-7-20-0) | (5-5-10-4) |
| Estonia                | 22.3         | 22.4        | 17.9        | 11.3        | 4.2        |
|                        | (21-0-23-7)  | (21-1-23-7) | (16-8-19-1) | (10-4-12-4) | (3-4-5-2)  |
| Latvia                 | 22.8         | 21.4        | 17.9        | 13.5        | 6.4        |
|                        | (21-6-24-0)  | (20-4-22-5) | (17-0-18-7) | (12-6-14-5) | (5-3-7-6)  |
| Lithuania              | 23.4         | 18.8        | 14.2        | 11.0        | 4.6        |
|                        | (22-3-24-6)  | (17-8-19-9) | (13-4-15-1) | (10-1-11-9) | (3-6-5-6)  |
| Moldova                | 78.2         | 57.1        | 30.4        | 26.5        | 12.6       |
|                        | (58-7-102-3) | (48-0-66-9) | (26-3-34-9) | (22-5-30-9) | (9-2-16-4) |
| Russia                 | 33.7         | 30.5        | 23.1        | 19.5        | 9.6        |
|                        | (26-6-42-7)  | (24-1-38-0) | (18-2-29-4) | (19-3-19-8) | (7-5-12-1) |
| Ukraine                | 39.5         | 31.3        | 21.4        | 21.9        | 10.9       |
|                        | (29-6-50-3)  | (25-7-37-8) | (18-2-24-4) | (18-6-25-6) | (8-3-13-9) |
| Europe, Western        | 26.0         | 15.0        | 9.4         | 5.7         | 3.9        |
|                        | (25-8-26-3)  | (14-8-15-1) | (9-3-9-6)   | (5-6-5-8)   | (3-3-4-7)  |
| Andorra                | 17.9         | 11.6        | 7.2         | 3.8         | 2.6        |
|                        | (10-4-30-9)  | (6-0-18-9)  | (4-4-11-3)  | (2-4-5-7)   | (1-5-4-4)  |
| Austria                | 28.9         | 17.0        | 9.7         | 5.5         | 4.1        |
|                        | (28-0-29-7)  | (16-3-17-7) | (9-2-10-2)  | (5-1-5-9)   | (3-2-5-2)  |
| Belgium                | 24.4         | 14.7        | 10.3        | 5.8         | 4.2        |
|                        | (23-9-24-8)  | (14-4-15-1) | (10-0-10-6) | (5-6-6-0)   | (3-6-5-0)  |
| Cyprus                 | 36.1         | 18.6        | 11.2        | 6.0         | 4.1        |
|                        | (30-3-42-2)  | (17-7-19-6) | (10-5-12-0) | (5-4-6-6)   | (3-3-5-1)  |
| Denmark                | 16.1         | 10.2        | 9.3         | 5.6         | 3.8        |
|                        | (15-5-16-9)  | (9-6-10-9)  | (8-7-9-9)   | (5-2-6-0)   | (3-0-4-8)  |
| Finland                | 15.7         | 8.7         | 7.0         | 4.2         | 3.0        |
|                        | (15-0-16-4)  | (8-2-9-3)   | (6-5-7-4)   | (3-8-4-5)   | (2-3-3-8)  |
| France                 | 18.1         | 12.8        | 8.9         | 5.5         | 3.7        |
|                        | (17-9-18-4)  | (12-5-13-0) | (8-7-9-0)   | (5-3-5-6)   | (3-1-4-6)  |
| Germany                | 24.9         | 15.5        | 9.2         | 5.3         | 3.6        |
|                        | (24-6-25-2)  | (15-2-15-7) | (9-0-9-4)   | (5-2-5-5)   | (3-2-4-1)  |
| Greece                 | 33.8         | 19.9        | 10.4        | 6.4         | 4.0        |
|                        | (33-2-34-3)  | (19-5-20-3) | (10-1-10-8) | (6-1-6-6)   | (3-6-4-6)  |
| Iceland                | 15.1         | 9.5         | 6.9         | 3.9         | 2.4        |
|                        | (13-4-17-0)  | (8-2-11-1)  | (5-9-8-1)   | (3-2-4-8)   | (1-7-3-5)  |

|                         |                        |                        |                        |                     |                     |
|-------------------------|------------------------|------------------------|------------------------|---------------------|---------------------|
| Ireland                 | 22.7<br>(21.8-23.7)    | 14.5<br>(13.8-15.3)    | 9.7<br>(9.1-10.3)      | 7.0<br>(6.5-7.4)    | 4.6<br>(3.4-6.1)    |
| Israel                  | 27.9<br>(26.9-29.0)    | 18.5<br>(17.7-19.3)    | 12.2<br>(11.7-12.8)    | 7.3<br>(6.9-7.7)    | 4.3<br>(3.7-5.0)    |
| Italy                   | 32.5<br>(32.2-32.8)    | 15.8<br>(15.5-16.0)    | 9.5<br>(9.3-9.7)       | 5.5<br>(5.3-5.6)    | 3.7<br>(2.8-4.8)    |
| Luxembourg              | 23.4<br>(21.2-25.7)    | 14.0<br>(12.3-15.8)    | 9.4<br>(8.2-10.7)      | 5.0<br>(4.3-5.9)    | 2.8<br>(2.0-3.9)    |
| Malta                   | 30.2<br>(27.6-33.1)    | 15.0<br>(13.4-16.8)    | 9.7<br>(8.6-11.1)      | 6.9<br>(6.0-8.2)    | 7.0<br>(5.1-9.5)    |
| Netherlands             | 16.7<br>(16.2-17.1)    | 11.1<br>(10.6-11.5)    | 8.9<br>(8.5-9.3)       | 6.5<br>(6.2-6.8)    | 4.1<br>(3.3-5.1)    |
| Norway                  | 16.8<br>(16.1-17.7)    | 9.9<br>(9.3-10.6)      | 9.0<br>(8.4-9.6)       | 5.0<br>(4.6-5.4)    | 3.0<br>(2.5-3.6)    |
| Portugal                | 64.5<br>(63.9-65.2)    | 28.1<br>(27.6-28.6)    | 14.5<br>(14.1-14.8)    | 7.1<br>(6.9-7.4)    | 3.5<br>(3.0-4.0)    |
| Spain                   | 32.0<br>(31.5-32.3)    | 14.7<br>(14.4-15.0)    | 9.4<br>(9.1-9.6)       | 5.4<br>(5.2-5.6)    | 3.6<br>(2.9-4.4)    |
| Sweden                  | 12.8<br>(12.2-13.3)    | 8.6<br>(8.1-9.1)       | 7.4<br>(7.0-7.8)       | 4.0<br>(3.7-4.2)    | 2.7<br>(2.1-3.4)    |
| Switzerland             | 18.1<br>(17.8-18.6)    | 10.2<br>(9.8-10.5)     | 8.5<br>(8.2-8.8)       | 5.7<br>(5.4-5.9)    | 4.3<br>(3.8-5.0)    |
| UK                      | 22.4<br>(22.1-22.6)    | 15.2<br>(14.9-15.5)    | 9.6<br>(9.3-9.8)       | 6.3<br>(6.2-6.5)    | 4.9<br>(4.0-6.0)    |
| Latin America, Andean   | 171.1<br>(166.8-176.2) | 115.1<br>(112.4-118.1) | 76.3<br>(74.4-78.2)    | 46.1<br>(44.9-47.4) | 28.2<br>(26.9-29.6) |
| Bolivia                 | 225.4<br>(216.7-233.6) | 157.8<br>(152.5-162.8) | 109.4<br>(105.7-113.1) | 69.5<br>(66.5-72.6) | 41.9<br>(39.0-45.2) |
| Ecuador                 | 136.7<br>(130.6-142.7) | 84.6<br>(81.1-88.3)    | 54.9<br>(52.1-57.9)    | 40.4<br>(37.9-42.9) | 28.6<br>(26.6-30.9) |
| Peru                    | 169.4<br>(163.8-175.5) | 114.8<br>(110.7-119.1) | 74.6<br>(72.0-77.3)    | 39.5<br>(37.9-41.2) | 22.0<br>(20.5-23.8) |
| Latin America, Central  | 104.8<br>(101.9-107.9) | 68.9<br>(66.8-71.1)    | 42.8<br>(41.1-44.5)    | 28.7<br>(27.5-29.9) | 18.0<br>(16.5-19.7) |
| Colombia                | 86.8<br>(82.3-91.0)    | 52.5<br>(50.0-55.2)    | 34.1<br>(32.2-35.8)    | 27.0<br>(25.4-28.7) | 17.9<br>(16.3-19.8) |
| Costa Rica              | 67.1<br>(63.0-71.2)    | 32.2<br>(29.7-34.6)    | 21.2<br>(19.4-23.0)    | 15.2<br>(13.8-16.7) | 10.4<br>(9.5-11.5)  |
| El Salvador             | 150.6<br>(141.4-159.3) | 94.2<br>(89.1-100.0)   | 54.5<br>(50.9-58.5)    | 30.2<br>(28.0-32.6) | 13.4<br>(12.2-14.8) |
| Guatemala               | 175.4<br>(167.4-183.4) | 124.5<br>(119.5-130.4) | 76.1<br>(72.4-79.5)    | 51.1<br>(47.3-54.9) | 28.1<br>(25.5-30.9) |
| Honduras                | 139.0<br>(130.2-149.0) | 92.6<br>(87.8-97.5)    | 54.3<br>(51.5-57.0)    | 36.8<br>(34.9-38.7) | 23.1<br>(21.2-25.2) |
| Mexico                  | 105.9<br>(100.4-111.3) | 70.4<br>(66.6-74.4)    | 42.6<br>(39.5-46.4)    | 26.9<br>(24.8-29.1) | 16.8<br>(15.3-18.6) |
| Nicaragua               | 180.9<br>(172.3-191.2) | 106.1<br>(101.4-111.1) | 66.5<br>(63.3-69.3)    | 39.8<br>(37.3-42.3) | 24.1<br>(22.0-26.7) |
| Panama                  | 58.1<br>(54.5-62.0)    | 36.8<br>(33.5-40.3)    | 27.7<br>(25.4-30.0)    | 23.4<br>(21.5-25.5) | 18.7<br>(17.0-20.6) |
| Venezuela               | 66.8<br>(66.2-67.4)    | 41.4<br>(40.9-41.8)    | 29.8<br>(29.4-30.1)    | 20.9<br>(20.6-21.1) | 13.3<br>(12.5-14.1) |
| Latin America, Southern | 74.6<br>(74.1-75.2)    | 38.9<br>(38.5-39.2)    | 25.5<br>(25.2-25.9)    | 16.9<br>(16.7-17.1) | 12.3<br>(9.2-16.5)  |
| Argentina               | 71.1<br>(70.4-71.8)    | 39.6<br>(39.2-40.0)    | 28.5<br>(28.1-28.9)    | 19.4<br>(19.1-19.7) | 14.2<br>(10.8-18.5) |
| Chile                   | 85.7<br>(84.7-86.6)    | 36.7<br>(36.0-37.5)    | 19.0<br>(18.6-19.5)    | 10.7<br>(10.3-11.0) | 7.4<br>(5.1-10.8)   |
| Uruguay                 | 52.6<br>(51.2-54.2)    | 40.0<br>(38.7-41.4)    | 23.3<br>(22.3-24.3)    | 15.9<br>(15.1-16.8) | 10.9<br>(7.0-16.7)  |
| Latin America, Tropical | 116.3<br>(110.7-122.4) | 83.2<br>(79.5-87.4)    | 51.9<br>(49.3-54.8)    | 31.4<br>(29.3-33.6) | 18.2<br>(16.7-19.8) |
| Brazil                  | 117.5<br>(111.8-123.6) | 84.0<br>(80.2-88.2)    | 52.4<br>(49.8-55.4)    | 31.5<br>(29.3-33.7) | 18.0<br>(16.6-19.7) |
| Paraguay                | 76.6                   | 56.8                   | 37.8                   | 29.2                | 21.0                |

|                                |               |               |               |             |             |
|--------------------------------|---------------|---------------|---------------|-------------|-------------|
|                                | (72.0-81.0)   | (53.4-59.9)   | (35.3-40.3)   | (27.2-31.3) | (19.3-22.9) |
| North Africa/Middle East       | 193.1         | 120.9         | 72.2          | 45.6        | 25.2        |
|                                | (187.4-198.8) | (117.8-124.4) | (70.6-74.1)   | (43.7-47.4) | (23.4-27.1) |
| Algeria                        | 189.2         | 111.0         | 58.5          | 38.3        | 24.3        |
|                                | (176.5-201.6) | (104.4-118.1) | (54.6-62.4)   | (35.1-41.5) | (21.2-28.0) |
| Bahrain                        | 86.0          | 28.1          | 20.8          | 11.9        | 6.9         |
|                                | (77.3-96.4)   | (26.5-30.0)   | (19.9-21.8)   | (11.2-12.6) | (6.2-7.5)   |
| Egypt                          | 241.2         | 158.3         | 83.4          | 43.7        | 21.8        |
|                                | (235.1-247.7) | (154.0-162.8) | (80.5-86.2)   | (42.0-45.5) | (19.6-24.3) |
| Iran                           | 231.9         | 128.3         | 77.8          | 42.8        | 18.9        |
|                                | (215.5-250.9) | (119.4-137.9) | (75.6-80.1)   | (39.3-46.5) | (16.4-21.9) |
| Iraq                           | 109.8         | 71.5          | 53.0          | 42.8        | 28.8        |
|                                | (100.5-118.2) | (67.7-75.3)   | (50.4-55.6)   | (40.7-45.2) | (26.2-31.7) |
| Jordan                         | 90.2          | 53.6          | 33.4          | 26.7        | 18.3        |
|                                | (85.7-94.4)   | (51.4-55.7)   | (32.0-34.9)   | (25.5-27.9) | (16.7-20.2) |
| Kuwait                         | 49.3          | 31.2          | 18.0          | 12.6        | 8.9         |
|                                | (47.8-50.5)   | (30.3-32.1)   | (17.2-18.7)   | (12.1-13.2) | (8.2-9.6)   |
| Lebanon                        | 62.3          | 59.0          | 40.2          | 22.0        | 13.3        |
|                                | (56.8-67.7)   | (55.5-62.8)   | (37.8-43.0)   | (19.7-24.3) | (11.7-15.2) |
| Libya                          | 118.9         | 62.5          | 40.0          | 25.6        | 14.3        |
|                                | (109.5-127.9) | (57.8-67.1)   | (36.6-43.7)   | (22.9-28.7) | (12.5-16.6) |
| Morocco                        | 176.4         | 120.2         | 70.5          | 47.9        | 26.3        |
|                                | (171.1-181.9) | (116.6-124.2) | (67.7-73.3)   | (45.3-50.8) | (23.2-29.8) |
| Oman                           | 236.5         | 105.4         | 41.0          | 20.2        | 8.5         |
|                                | (219.2-254.6) | (96.1-114.7)  | (36.6-45.4)   | (17.4-22.9) | (7.4-10.0)  |
| Palestine                      | 130.0         | 70.8          | 46.2          | 30.9        | 19.6        |
|                                | (115.2-146.0) | (62.8-79.3)   | (40.7-51.5)   | (27.3-34.9) | (17.0-22.8) |
| Qatar                          | 65.5          | 32.9          | 22.0          | 15.5        | 10.3        |
|                                | (58.1-74.0)   | (29.0-37.1)   | (19.4-24.6)   | (13.7-17.4) | (9.0-12.0)  |
| Saudi Arabia                   | 147.4         | 84.8          | 44.4          | 23.1        | 12.0        |
|                                | (131.6-163.3) | (75.9-94.1)   | (39.2-50.0)   | (20.3-26.5) | (10.4-14.0) |
| Sudan                          | 154.9         | 140.0         | 108.6         | 79.7        | 47.1        |
|                                | (148.7-161.3) | (134.8-146.0) | (102.6-114.2) | (72.8-87.7) | (41.6-53.4) |
| Syria                          | 111.3         | 63.8          | 42.7          | 22.2        | 17.0        |
|                                | (104.4-117.8) | (59.4-68.5)   | (39.3-46.2)   | (20.5-23.9) | (15.8-18.3) |
| Tunisia                        | 160.4         | 86.0          | 49.0          | 27.7        | 14.1        |
|                                | (153.9-167.2) | (82.5-89.5)   | (46.3-51.7)   | (25.7-30.1) | (12.6-15.9) |
| Turkey                         | 197.4         | 122.8         | 69.8          | 39.8        | 17.4        |
|                                | (190.7-204.1) | (118.8-127.4) | (67.1-72.6)   | (37.5-42.1) | (15.5-19.6) |
| United Arab Emirates           | 111.7         | 47.9          | 21.4          | 12.3        | 6.8         |
|                                | (101.1-123.5) | (42.6-53.8)   | (18.7-24.8)   | (11.1-13.6) | (6.0-7.6)   |
| Yemen                          | 319.4         | 196.2         | 122.1         | 86.7        | 50.4        |
|                                | (308.1-329.1) | (189.7-202.6) | (117.6-126.6) | (82.0-91.1) | (44.5-57.5) |
| North America, High-income     | 24.1          | 15.4          | 11.1          | 8.0         | 6.5         |
|                                | (23.9-24.2)   | (15.2-15.5)   | (11.0-11.2)   | (7.9-8.1)   | (5.4-7.9)   |
| Canada                         | 22.5          | 13.0          | 8.6           | 6.1         | 5.4         |
|                                | (22.1-23.0)   | (12.6-13.4)   | (8.3-8.9)     | (5.8-6.3)   | (4.4-6.6)   |
| USA                            | 24.2          | 15.6          | 11.3          | 8.2         | 6.6         |
|                                | (24.1-24.4)   | (15.5-15.7)   | (11.2-11.4)   | (8.1-8.3)   | (5.5-8.1)   |
| Oceania                        | 102.7         | 85.0          | 76.6          | 68.7        | 50.5        |
|                                | (86.7-117.9)  | (74.8-95.5)   | (66.9-86.1)   | (54.3-84.5) | (32.6-76.5) |
| Federated States of Micronesia | 85.5          | 48.7          | 47.4          | 26.6        | 14.7        |
|                                | (66.2-105.7)  | (38.7-59.0)   | (38.3-57.5)   | (18.1-36.3) | (8.9-23.5)  |
| Fiji                           | 59.9          | 46.5          | 33.3          | 31.0        | 32.7        |
|                                | (54.7-65.2)   | (38.3-55.4)   | (24.9-44.9)   | (23.7-41.3) | (21.5-48.9) |
| Kiribati                       | 165.4         | 112.9         | 88.8          | 69.0        | 52.2        |
|                                | (137.6-194.0) | (87.4-145.0)  | (73.2-106.9)  | (58.8-81.1) | (35.6-75.4) |
| Marshall Islands               | 103.0         | 61.6          | 47.8          | 41.3        | 31.8        |
|                                | (59.6-158.8)  | (41.4-85.8)   | (37.3-58.9)   | (31.6-52.6) | (19.2-51.8) |
| Papua New Guinea               | 114.2         | 98.9          | 92.6          | 80.7        | 57.0        |
|                                | (94.2-133.9)  | (85.3-113.5)  | (80.0-104.4)  | (63.0-99.8) | (36.7-86.4) |
| Samoa                          | 63.1          | 34.0          | 23.2          | 17.0        | 12.1        |
|                                | (52.4-75.7)   | (24.2-48.3)   | (14.1-37.2)   | (10.1-25.3) | (6.9-20.4)  |
| Solomon Islands                | 116.1         | 62.4          | 41.7          | 32.1        | 21.8        |
|                                | (93.4-141.4)  | (45.9-84.1)   | (30.7-54.3)   | (22.2-43.8) | (13.2-35.1) |



|                                  |                        |                        |                        |                        |                        |
|----------------------------------|------------------------|------------------------|------------------------|------------------------|------------------------|
| Tonga                            | 43.3<br>(33.9-53.7)    | 34.7<br>(25.0-46.6)    | 28.1<br>(17.5-42.8)    | 30.1<br>(17.1-47.9)    | 23.5<br>(13.5-39.3)    |
| Vanuatu                          | 88.3<br>(67.5-114.8)   | 54.0<br>(41.4-68.5)    | 36.3<br>(28.6-44.3)    | 37.4<br>(31.4-43.2)    | 34.5<br>(23.5-50.0)    |
| sub-Saharan Africa, Central      | 232.1<br>(207.7-257.6) | 197.9<br>(187.6-208.0) | 174.8<br>(168.6-180.7) | 163.2<br>(157.6-169.1) | 110.7<br>(93.0-130.9)  |
| Angola                           | 235.7<br>(189.9-284.1) | 195.9<br>(174.6-217.5) | 185.5<br>(173.6-195.6) | 152.5<br>(142.1-163.2) | 90.1<br>(72.2-109.9)   |
| Central African Republic         | 209.8<br>(194.5-224.2) | 188.7<br>(178.8-198.3) | 177.1<br>(169.1-184.8) | 163.2<br>(150.5-175.4) | 137.7<br>(107.4-176.5) |
| Congo                            | 148.8<br>(116.9-186.5) | 116.5<br>(101.1-130.6) | 92.1<br>(87.1-97.9)    | 111.0<br>(104.8-117.3) | 61.1<br>(51.8-69.9)    |
| Democratic Republic of the Congo | 240.1<br>(207.5-272.5) | 206.9<br>(193.8-220.3) | 178.1<br>(169.5-186.8) | 171.4<br>(163.8-179.3) | 120.3<br>(96.1-150.2)  |
| Equatorial Guinea                | 238.9<br>(190.9-288.9) | 173.9<br>(149.2-195.2) | 167.1<br>(148.1-186.3) | 168.9<br>(146.8-191.9) | 109.4<br>(82.5-142.6)  |
| Gabon                            | 157.7<br>(134.4-191.5) | 117.8<br>(109.1-126.1) | 85.8<br>(81.0-91.1)    | 70.9<br>(66.7-75.3)    | 60.4<br>(50.5-71.2)    |
| sub-Saharan Africa, Eastern      | 215.6<br>(208.1-223.1) | 194.7<br>(190.8-198.5) | 171.7<br>(168.8-174.7) | 135.2<br>(132.7-137.7) | 76.5<br>(71.0-82.6)    |
| Burundi                          | 238.7<br>(225.0-254.0) | 214.5<br>(203.5-224.5) | 175.5<br>(165.5-185.7) | 179.1<br>(170.4-188.6) | 88.7<br>(75.3-104.8)   |
| Comoros                          | 200.0<br>(175.5-226.3) | 167.3<br>(156.9-178.8) | 121.8<br>(114.5-129.5) | 83.2<br>(69.7-99.0)    | 45.8<br>(33.2-63.1)    |
| Djibouti                         | 126.4<br>(100.9-157.6) | 114.1<br>(98.2-135.4)  | 111.6<br>(100.2-120.6) | 101.8<br>(91.5-114.4)  | 62.9<br>(47.3-82.1)    |
| Eritrea                          | 225.1<br>(200.4-247.5) | 185.4<br>(175.5-196.0) | 151.5<br>(144.7-158.9) | 114.0<br>(107.2-121.2) | 58.2<br>(41.9-79.9)    |
| Ethiopia                         | 240.8<br>(220.0-263.1) | 240.1<br>(229.5-252.1) | 203.9<br>(195.5-212.0) | 144.3<br>(137.9-150.8) | 74.4<br>(62.7-88.4)    |
| Kenya                            | 137.7<br>(130.8-144.8) | 103.6<br>(99.3-108.5)  | 94.9<br>(90.5-99.5)    | 95.8<br>(90.8-101.7)   | 58.3<br>(46.5-73.4)    |
| Madagascar                       | 169.5<br>(159.1-181.9) | 167.8<br>(160.2-175.2) | 145.8<br>(140.1-151.9) | 96.7<br>(91.5-101.4)   | 58.5<br>(46.5-73.7)    |
| Malawi                           | 351.6<br>(334.0-369.8) | 261.3<br>(250.3-272.3) | 227.1<br>(219.7-235.5) | 166.2<br>(159.6-172.7) | 89.9<br>(76.5-103.4)   |
| Mauritius                        | 71.8<br>(69.8-73.9)    | 43.1<br>(41.6-44.8)    | 22.0<br>(20.9-23.2)    | 17.5<br>(16.5-18.4)    | 14.0<br>(12.2-16.0)    |
| Mozambique                       | 245.3<br>(213.4-277.8) | 222.9<br>(212.4-233.4) | 220.6<br>(213.5-228.6) | 156.3<br>(150.6-162.7) | 88.4<br>(76.9-101.5)   |
| Rwanda                           | 234.3<br>(220.4-247.3) | 209.3<br>(201.4-217.4) | 163.3<br>(156.9-170.4) | 158.7<br>(151.8-164.8) | 62.6<br>(50.7-78.2)    |
| Seychelles                       | 71.1<br>(65.7-76.4)    | 33.7<br>(30.4-37.4)    | 17.3<br>(15.3-19.3)    | 13.1<br>(11.3-15.0)    | 11.7<br>(10.1-13.7)    |
| Somalia                          | 203.1<br>(157.6-258.1) | 191.8<br>(162.9-224.8) | 188.8<br>(175.2-202.6) | 157.3<br>(146.9-169.1) | 113.7<br>(88.9-144.5)  |
| South Sudan                      | 256.8<br>(198.5-330.1) | 229.6<br>(189.0-273.6) | 200.7<br>(173.9-231.5) | 149.2<br>(129.2-173.8) | 105.9<br>(83.8-135.1)  |
| Tanzania                         | 217.7<br>(206.3-227.7) | 169.1<br>(162.5-176.1) | 150.6<br>(145.2-156.7) | 122.1<br>(116.6-127.0) | 76.5<br>(63.8-90.4)    |
| Uganda                           | 179.4<br>(168.8-191.4) | 194.5<br>(186.3-203.1) | 163.2<br>(157.1-170.2) | 138.0<br>(132.4-144.2) | 80.1<br>(69.4-93.1)    |
| Zambia                           | 186.2<br>(174.9-197.9) | 161.1<br>(154.0-168.1) | 174.8<br>(168.7-182.4) | 152.2<br>(145.5-158.6) | 80.5<br>(63.4-101.2)   |
| sub-Saharan Africa, Southern     | 131.8<br>(118.4-147.2) | 101.6<br>(95.0-108.4)  | 69.7<br>(65.6-74.5)    | 79.4<br>(68.9-89.5)    | 46.9<br>(39.8-54.6)    |
| Botswana                         | 104.2<br>(95.6-112.2)  | 67.1<br>(63.1-71.3)    | 54.9<br>(49.7-60.4)    | 67.0<br>(60.0-75.1)    | 30.9<br>(22.4-41.9)    |
| Lesotho                          | 128.4<br>(118.7-137.9) | 109.5<br>(101.1-119.0) | 91.8<br>(86.5-98.5)    | 102.3<br>(97.0-108.4)  | 89.6<br>(71.3-113.8)   |
| Namibia                          | 104.9<br>(95.5-116.0)  | 98.3<br>(92.3-103.5)   | 70.4<br>(66.4-74.0)    | 63.8<br>(60.0-67.9)    | 34.7<br>(24.2-49.0)    |
| South Africa                     | 141.0<br>(121.5-163.1) | 103.8<br>(94.1-113.6)  | 70.0<br>(63.7-77.1)    | 80.9<br>(65.2-96.7)    | 37.0<br>(27.8-47.8)    |
| Swaziland                        | 143.9                  | 116.8                  | 75.1                   | 100.7                  | 74.4                   |

|                             |               |               |               |               |               |
|-----------------------------|---------------|---------------|---------------|---------------|---------------|
| Zimbabwe                    | (117.0-171.5) | (104.9-128.2) | (69.9-81.3)   | (95.3-106.4)  | (58.1-96.0)   |
|                             | 106.6         | 97.1          | 67.1          | 74.0          | 69.0          |
|                             | (98.8-114.1)  | (92.4-102.6)  | (64.4-70.2)   | (70.2-77.6)   | (56.3-84.7)   |
| sub-Saharan Africa, Western | 266.9         | 215.9         | 194.7         | 170.7         | 114.3         |
|                             | (259.8-273.9) | (211.4-220.6) | (191.1-198.0) | (167.6-173.8) | (106.8-122.1) |
| Benin                       | 291.9         | 218.7         | 175.4         | 128.6         | 60.1          |
|                             | (277.6-306.4) | (210.1-227.1) | (168.8-181.3) | (123.7-134.0) | (54.1-67.1)   |
| Burkina Faso                | 324.2         | 254.5         | 207.5         | 181.8         | 104.0         |
|                             | (308.8-340.2) | (245.6-264.5) | (200.8-214.7) | (175.1-188.6) | (93.0-116.6)  |
| Cameroon                    | 212.3         | 176.2         | 135.2         | 139.8         | 100.9         |
|                             | (202.8-223.7) | (169.2-183.5) | (130.1-140.4) | (134.4-145.7) | (91.9-113.9)  |
| Cape Verde                  | 148.7         | 69.3          | 57.0          | 44.9          | 24.1          |
|                             | (145.1-152.2) | (66.4-71.9)   | (54.5-59.5)   | (39.1-51.4)   | (20.0-29.2)   |
| Chad                        | 239.1         | 238.8         | 203.1         | 189.0         | 146.5         |
|                             | (219.9-260.7) | (230.0-249.4) | (195.8-210.9) | (181.2-196.6) | (128.2-170.3) |
| Côte d'Ivoire               | 234.4         | 166.7         | 152.3         | 141.1         | 96.0          |
|                             | (224.8-246.2) | (160.0-173.0) | (147.0-158.5) | (134.9-147.4) | (86.7-108.9)  |
| Ghana                       | 178.9         | 155.0         | 121.7         | 102.1         | 71.4          |
|                             | (170.3-187.2) | (149.3-160.8) | (117.7-126.6) | (98.2-105.8)  | (62.4-82.3)   |
| Guinea                      | 305.8         | 278.4         | 229.6         | 173.4         | 108.6         |
|                             | (280.5-331.3) | (267.3-290.2) | (221.5-238.0) | (166.6-180.1) | (99.6-117.7)  |
| Guinea-Bissau               | 291.2         | 247.5         | 220.7         | 193.6         | 152.5         |
|                             | (263.7-318.6) | (222.3-268.4) | (204.7-238.2) | (177.2-209.3) | (130.6-177.4) |
| Liberia                     | 293.4         | 238.0         | 224.7         | 159.7         | 77.5          |
|                             | (278.7-307.1) | (227.4-249.3) | (214.5-234.5) | (153.0-166.3) | (66.2-91.4)   |
| Mali                        | 374.5         | 307.4         | 255.6         | 219.4         | 148.8         |
|                             | (360.9-388.2) | (298.2-316.6) | (246.9-264.5) | (211.2-227.8) | (126.4-176.0) |
| Mauritania                  | 169.9         | 142.4         | 104.8         | 98.1          | 69.3          |
|                             | (159.3-179.1) | (135.0-150.0) | (99.6-110.3)  | (90.9-105.7)  | (58.4-82.5)   |
| Niger                       | 332.2         | 314.2         | 299.1         | 224.2         | 115.4         |
|                             | (317.5-347.8) | (303.0-324.5) | (289.9-308.3) | (216.2-232.4) | (104.9-127.4) |
| Nigeria                     | 268.6         | 211.5         | 207.1         | 184.1         | 128.0         |
|                             | (255.1-282.2) | (203.6-221.1) | (200.5-213.7) | (178.0-190.6) | (114.3-142.0) |
| Sao Tome and Principe       | 150.3         | 110.1         | 96.4          | 76.1          | 40.7          |
|                             | (144.2-156.2) | (103.7-116.8) | (90.4-103.1)  | (70.4-80.7)   | (34.5-48.2)   |
| Senegal                     | 293.2         | 210.9         | 145.2         | 125.2         | 59.5          |
|                             | (283.0-303.1) | (203.3-218.3) | (140.3-150.3) | (120.4-130.2) | (53.4-66.8)   |
| Sierra Leone                | 277.0         | 264.7         | 230.4         | 199.4         | 126.8         |
|                             | (247.6-306.2) | (247.4-281.8) | (220.1-240.7) | (191.9-208.4) | (111.6-144.3) |
| The Gambia                  | 241.2         | 195.4         | 161.7         | 124.9         | 74.6          |
|                             | (212.8-268.5) | (179.6-212.3) | (148.8-174.3) | (115.0-135.9) | (62.2-90.0)   |
| Togo                        | 224.4         | 173.4         | 146.2         | 124.1         | 92.8          |
|                             | (212.8-237.6) | (166.0-181.6) | (140.0-152.5) | (114.8-133.1) | (77.5-111.8)  |

**Web table 2b. Numbers of under-5 deaths for five-year intervals from 1970 to 2013 for 188 countries and 21 Global Burden of Disease regions.**

| <b>Web Table 2b. Numbers of under-5 deaths for five-year intervals from 1970 to 2013 for 188 countries and 21 Global Burden of Disease regions</b> |                              |                              |                              |                           |                           |
|----------------------------------------------------------------------------------------------------------------------------------------------------|------------------------------|------------------------------|------------------------------|---------------------------|---------------------------|
|                                                                                                                                                    | Under-5 deaths in 1000s      |                              |                              |                           |                           |
|                                                                                                                                                    | 1970                         | 1980                         | 1990                         | 2000                      | 2013                      |
| Global                                                                                                                                             | 17597.8<br>(17119.3-18099.4) | 14012.4<br>(13782.5-14227.7) | 12206.3<br>(12026.1-12384.0) | 9327.6<br>(9206.8-9455.7) | 6274.8<br>(5976.8-6593.4) |
| Asia Pacific, High-income                                                                                                                          | 85.6<br>(81.1-89.8)          | 36.2<br>(31.9-41.7)          | 14.8<br>(13.4-16.6)          | 9.6<br>(9.5-9.8)          | 5.1<br>(4.4-6.1)          |
| Brunei                                                                                                                                             | 0.2<br>(0.2-0.3)             | 0.1<br>(0.1-0.1)             | 0.1<br>(0.1-0.1)             | 0.1<br>(0.1-0.1)          | 0.1<br>(0.0-0.1)          |
| Japan                                                                                                                                              | 33.2<br>(32.8-33.5)          | 16.1<br>(15.8-16.4)          | 7.9<br>(7.7-8.1)             | 5.3<br>(5.1-5.4)          | 3.2<br>(2.5-4.0)          |
| Singapore                                                                                                                                          | 1.2<br>(1.2-1.3)             | 0.6<br>(0.6-0.6)             | 0.4<br>(0.4-0.4)             | 0.2<br>(0.2-0.2)          | 0.1<br>(0.1-0.1)          |
| South Korea                                                                                                                                        | 51.0<br>(46.4-55.2)          | 19.3<br>(15.1-24.7)          | 6.4<br>(5.0-8.3)             | 4.0<br>(3.9-4.1)          | 1.8<br>(1.6-1.9)          |
| Asia, Central                                                                                                                                      | 166.7<br>(157.5-175.8)       | 138.8<br>(132.9-145.2)       | 126.6<br>(122.8-130.5)       | 82.1<br>(79.3-85.4)       | 61.9<br>(57.7-66.5)       |
| Armenia                                                                                                                                            | 6.6<br>(6.0-7.3)             | 4.9<br>(4.5-5.2)             | 3.7<br>(3.4-3.9)             | 1.3<br>(1.2-1.4)          | 0.7<br>(0.6-0.8)          |
| Azerbaijan                                                                                                                                         | 20.1<br>(18.4-22.0)          | 14.6<br>(13.3-15.9)          | 15.3<br>(14.4-16.3)          | 9.2<br>(8.6-9.9)          | 5.9<br>(5.3-6.5)          |
| Georgia                                                                                                                                            | 7.7<br>(7.0-8.6)             | 5.0<br>(4.6-5.5)             | 3.7<br>(3.4-4.0)             | 2.1<br>(1.9-2.2)          | 1.2<br>(1.1-1.4)          |
| Kazakhstan                                                                                                                                         | 20.6<br>(18.8-22.6)          | 18.2<br>(17.0-19.6)          | 15.3<br>(14.3-16.2)          | 8.5<br>(7.8-9.3)          | 7.7<br>(7.0-8.6)          |
| Kyrgyzstan                                                                                                                                         | 13.4<br>(12.3-14.6)          | 11.0<br>(10.3-11.8)          | 9.8<br>(9.3-10.4)            | 5.4<br>(5.0-5.8)          | 4.4<br>(4.0-4.8)          |
| Mongolia                                                                                                                                           | 8.8<br>(8.1-9.5)             | 8.0<br>(7.4-8.6)             | 6.8<br>(6.4-7.3)             | 3.1<br>(2.8-3.3)          | 2.7<br>(2.5-3.0)          |
| Tajikistan                                                                                                                                         | 21.1<br>(19.2-23.0)          | 18.8<br>(17.4-20.3)          | 19.8<br>(18.7-20.9)          | 14.1<br>(13.3-15.0)       | 11.1<br>(10.1-12.1)       |
| Turkmenistan                                                                                                                                       | 17.8<br>(16.3-19.4)          | 13.5<br>(12.3-14.9)          | 12.7<br>(11.6-13.8)          | 8.6<br>(7.8-9.4)          | 5.8<br>(5.2-6.6)          |
| Uzbekistan                                                                                                                                         | 48.3<br>(43.7-52.7)          | 43.7<br>(41.1-46.7)          | 38.8<br>(36.6-41.2)          | 29.8<br>(27.5-32.0)       | 22.3<br>(20.2-24.8)       |
| Asia, East                                                                                                                                         | 3976.1<br>(3650.1-4360.4)    | 1887.0<br>(1729.4-2052.1)    | 1664.5<br>(1559.9-1776.4)    | 628.1<br>(599.5-656.8)    | 247.4<br>(229.7-265.2)    |
| China                                                                                                                                              | 3856.9<br>(3540.8-4243.6)    | 1844.0<br>(1688.2-2009.7)    | 1585.4<br>(1483.5-1694.1)    | 607.2<br>(578.4-635.5)    | 238.8<br>(220.9-256.0)    |
| North Korea                                                                                                                                        | 108.6<br>(89.3-127.2)        | 36.8<br>(29.9-45.3)          | 22.7<br>(18.2-27.7)          | 18.3<br>(15.1-22.0)       | 7.6<br>(6.1-9.4)          |
| Taiwan (Province of China)                                                                                                                         | 10.6<br>(10.4-10.8)          | 6.2<br>(6.1-6.4)             | 2.8<br>(2.8-2.9)             | 2.6<br>(2.5-2.6)          | 1.0<br>(0.9-1.1)          |
| Asia, South                                                                                                                                        | 5769.1<br>(5647.9-5901.6)    | 5117.6<br>(5010.3-5215.7)    | 4253.1<br>(4173.7-4333.5)    | 3209.5<br>(3137.2-3283.2) | 1844.0<br>(1694.2-2031.5) |
| Afghanistan                                                                                                                                        | 170.1<br>(155.8-187.4)       | 153.9<br>(142.0-167.0)       | 105.3<br>(99.1-112.6)        | 145.6<br>(136.2-153.7)    | 94.7<br>(85.6-105.2)      |
| Bangladesh                                                                                                                                         | 730.9<br>(708.3-752.4)       | 664.7<br>(650.5-678.0)       | 507.3<br>(496.5-519.5)       | 301.4<br>(293.1-310.1)    | 128.2<br>(116.0-142.7)    |
| Bhutan                                                                                                                                             | 3.2<br>(2.7-3.6)             | 3.5<br>(3.1-3.8)             | 2.7<br>(2.4-2.9)             | 1.4<br>(1.3-1.5)          | 0.7<br>(0.6-0.8)          |
| India                                                                                                                                              | 4225.4<br>(4112.2-4356.9)    | 3690.3<br>(3579.0-3784.1)    | 3041.7<br>(2958.0-3115.4)    | 2265.3<br>(2198.5-2336.8) | 1249.7<br>(1103.8-1443.7) |
| Nepal                                                                                                                                              | 130.8<br>(126.0-135.3)       | 127.5<br>(124.0-131.1)       | 97.6<br>(94.8-100.5)         | 63.0<br>(60.9-65.2)       | 22.2<br>(20.0-24.9)       |
| Pakistan                                                                                                                                           | 417.0<br>(401.0-431.5)       | 449.6<br>(434.7-464.4)       | 491.9<br>(477.5-508.0)       | 432.8<br>(419.0-445.1)    | 348.5<br>(321.9-379.2)    |
| Asia, Southeast                                                                                                                                    | 1524.1                       | 1194.5                       | 859.3                        | 534.0                     | 320.9                     |

|                                  |                 |                 |               |               |               |
|----------------------------------|-----------------|-----------------|---------------|---------------|---------------|
| Burma                            | (1465.8-1581.8) | (1156.7-1231.5) | (833.5-886.8) | (514.7-553.8) | (289.3-358.5) |
|                                  | 201.6           | 165.0           | 122.5         | 76.8          | 34.1          |
| Cambodia                         | (177.6-228.4)   | (144.6-186.4)   | (107.5-139.6) | (65.7-89.2)   | (29.0-40.2)   |
|                                  | 57.1            | 47.2            | 44.7          | 34.1          | 16.7          |
| Indonesia                        | (51.1-63.7)     | (43.2-51.2)     | (42.6-47.0)   | (32.4-36.1)   | (14.4-19.2)   |
|                                  | 757.3           | 599.5           | 398.6         | 240.5         | 148.8         |
| Laos                             | (725.6-793.6)   | (575.4-625.0)   | (384.0-415.8) | (229.1-252.8) | (132.2-168.2) |
|                                  | 26.7            | 27.4            | 28.0          | 20.7          | 11.1          |
| Malaysia                         | (23.1-30.4)     | (24.4-30.7)     | (25.9-30.5)   | (18.9-22.4)   | (9.5-12.6)    |
|                                  | 19.7            | 12.8            | 8.5           | 4.9           | 3.3           |
| Maldives                         | (19.4-19.9)     | (11.4-14.6)     | (8.3-8.7)     | (4.8-5.0)     | (2.9-4.0)     |
|                                  | 1.2             | 0.9             | 0.6           | 0.3           | 0.1           |
| Philippines                      | (1.0-1.3)       | (0.8-1.0)       | (0.6-0.7)     | (0.2-0.3)     | (0.1-0.1)     |
|                                  | 121.2           | 132.9           | 108.4         | 88.0          | 65.1          |
| Sri Lanka                        | (112.9-130.7)   | (124.6-141.4)   | (101.9-115.3) | (81.6-95.2)   | (55.4-76.9)   |
|                                  | 25.7            | 18.6            | 13.2          | 5.7           | 3.4           |
| Thailand                         | (25.4-25.9)     | (18.3-18.8)     | (12.8-13.5)   | (5.6-5.8)     | (2.8-4.0)     |
|                                  | 122.3           | 65.7            | 33.8          | 17.4          | 7.7           |
| Timor-Leste                      | (114.0-130.3)   | (60.7-70.9)     | (29.1-38.2)   | (15.0-20.5)   | (6.5-9.2)     |
|                                  | 7.3             | 5.3             | 4.8           | 4.1           | 1.6           |
| Vietnam                          | (6.6-8.0)       | (4.9-5.7)       | (4.5-5.0)     | (3.9-4.3)     | (1.3-1.8)     |
|                                  | 174.1           | 119.1           | 93.8          | 41.4          | 26.6          |
|                                  | (153.7-196.7)   | (110.2-128.3)   | (88.0-100.5)  | (37.3-45.5)   | (22.6-31.5)   |
| Australasia                      | 6.9             | 3.7             | 3.1           | 2.0           | 1.8           |
|                                  | (6.8-7.1)       | (3.6-3.8)       | (3.0-3.2)     | (2.0-2.1)     | (1.5-2.1)     |
| Australia                        | 5.5             | 2.9             | 2.4           | 1.6           | 1.3           |
|                                  | (5.4-5.6)       | (2.8-3.0)       | (2.3-2.5)     | (1.5-1.6)     | (1.1-1.6)     |
| New Zealand                      | 1.3             | 0.8             | 0.6           | 0.4           | 0.3           |
|                                  | (1.2-1.3)       | (0.7-0.8)       | (0.6-0.7)     | (0.4-0.5)     | (0.3-0.4)     |
| Caribbean                        | 99.1            | 80.8            | 65.2          | 42.8          | 29.8          |
|                                  | (95.3-103.0)    | (77.4-84.1)     | (62.3-68.6)   | (40.9-44.6)   | (26.1-34.4)   |
| Antigua and Barbuda              | 0.1             | 0.0             | 0.0           | 0.0           | 0.0           |
|                                  | (0.0-0.1)       | (0.0-0.1)       | (0.0-0.0)     | (0.0-0.0)     | (0.0-0.0)     |
| Barbados                         | 0.3             | 0.2             | 0.1           | 0.1           | 0.1           |
|                                  | (0.2-0.4)       | (0.1-0.3)       | (0.1-0.2)     | (0.0-0.1)     | (0.0-0.1)     |
| Belize                           | 0.5             | 0.4             | 0.3           | 0.2           | 0.1           |
|                                  | (0.4-0.6)       | (0.3-0.5)       | (0.2-0.3)     | (0.2-0.2)     | (0.1-0.3)     |
| Cuba                             | 10.9            | 3.3             | 2.4           | 1.2           | 0.6           |
|                                  | (10.7-11.1)     | (3.2-3.3)       | (2.4-2.5)     | (1.2-1.3)     | (0.5-0.7)     |
| Dominica                         | 0.2             | 0.1             | 0.1           | 0.0           | 0.0           |
|                                  | (0.1-0.3)       | (0.0-0.1)       | (0.0-0.1)     | (0.0-0.0)     | (0.0-0.0)     |
| Dominican Republic               | 22.1            | 17.0            | 12.6          | 7.9           | 6.2           |
|                                  | (20.8-23.4)     | (16.1-17.8)     | (11.8-13.4)   | (7.4-8.4)     | (5.2-7.5)     |
| Grenada                          | 0.2             | 0.2             | 0.1           | 0.0           | 0.0           |
|                                  | (0.1-0.3)       | (0.1-0.3)       | (0.0-0.1)     | (0.0-0.1)     | (0.0-0.1)     |
| Guyana                           | 1.8             | 1.4             | 0.9           | 0.6           | 0.6           |
|                                  | (1.5-2.0)       | (1.0-1.7)       | (0.7-1.0)     | (0.5-0.6)     | (0.3-1.1)     |
| Haiti                            | 44.9            | 46.1            | 38.8          | 26.0          | 17.4          |
|                                  | (42.1-47.7)     | (43.6-48.9)     | (36.9-41.0)   | (24.5-27.5)   | (14.9-20.5)   |
| Jamaica                          | 4.5             | 2.3             | 1.9           | 1.3           | 0.9           |
|                                  | (3.8-5.2)       | (1.7-3.0)       | (1.4-2.4)     | (0.9-1.8)     | (0.4-1.9)     |
| Saint Lucia                      | 0.4             | 0.2             | 0.1           | 0.1           | 0.1           |
|                                  | (0.2-0.6)       | (0.1-0.3)       | (0.1-0.2)     | (0.0-0.1)     | (0.0-0.1)     |
| Saint Vincent and the Grenadines | 0.4             | 0.2             | 0.1           | 0.1           | 0.0           |
|                                  | (0.2-0.6)       | (0.1-0.4)       | (0.1-0.2)     | (0.0-0.1)     | (0.0-0.1)     |
| Suriname                         | 0.9             | 0.6             | 0.5           | 0.5           | 0.4           |
|                                  | (0.7-1.1)       | (0.6-0.8)       | (0.4-0.6)     | (0.4-0.5)     | (0.3-0.4)     |
| The Bahamas                      | 0.3             | 0.3             | 0.2           | 0.1           | 0.1           |
|                                  | (0.2-0.4)       | (0.2-0.4)       | (0.1-0.3)     | (0.1-0.1)     | (0.0-0.2)     |
| Trinidad and Tobago              | 1.3             | 1.2             | 0.7           | 0.6           | 0.4           |
|                                  | (1.1-1.6)       | (1.0-1.4)       | (0.5-1.0)     | (0.4-0.7)     | (0.2-0.9)     |
| Europe, Central                  | 95.6            | 63.5            | 37.5          | 16.0          | 8.4           |
|                                  | (84.9-112.2)    | (58.1-70.6)     | (36.1-39.4)   | (15.6-16.4)   | (6.1-11.8)    |
| Albania                          | 7.1             | 4.8             | 3.4           | 1.7           | 0.7           |
|                                  | (3.9-12.2)      | (3.3-6.7)       | (3.0-3.9)     | (1.5-2.1)     | (0.3-1.4)     |

|                        |                        |                       |                     |                     |                     |
|------------------------|------------------------|-----------------------|---------------------|---------------------|---------------------|
| Bosnia and Herzegovina | 5.1<br>(2.6-9.0)       | 2.9<br>(1.4-5.0)      | 1.2<br>(1.1-1.2)    | 0.4<br>(0.4-0.4)    | 0.2<br>(0.1-0.3)    |
| Bulgaria               | 4.4<br>(4.3-4.5)       | 3.2<br>(3.1-3.3)      | 1.9<br>(1.8-2.0)    | 1.2<br>(1.1-1.2)    | 0.7<br>(0.5-1.0)    |
| Croatia                | 3.2<br>(1.6-5.8)       | 1.7<br>(0.8-3.1)      | 0.7<br>(0.6-0.7)    | 0.4<br>(0.3-0.4)    | 0.2<br>(0.1-0.3)    |
| Czech Republic         | 3.5<br>(3.3-3.6)       | 3.0<br>(2.9-3.1)      | 1.6<br>(1.5-1.7)    | 0.5<br>(0.4-0.5)    | 0.4<br>(0.2-0.5)    |
| Hungary                | 6.1<br>(5.9-6.2)       | 3.8<br>(3.7-3.9)      | 2.1<br>(2.0-2.2)    | 1.0<br>(1.0-1.1)    | 0.5<br>(0.4-0.6)    |
| Macedonia              | 4.2<br>(2.1-7.0)       | 2.3<br>(1.5-3.5)      | 1.2<br>(1.2-1.3)    | 0.4<br>(0.4-0.4)    | 0.2<br>(0.1-0.3)    |
| Montenegro             | 0.6<br>(0.3-1.1)       | 0.4<br>(0.2-0.6)      | 0.2<br>(0.1-0.3)    | 0.2<br>(0.1-0.2)    | 0.0<br>(0.0-0.1)    |
| Poland                 | 20.3<br>(20.0-20.6)    | 16.8<br>(16.6-17.1)   | 10.0<br>(9.8-10.2)  | 3.5<br>(3.4-3.6)    | 2.1<br>(1.4-3.0)    |
| Romania                | 24.8<br>(24.5-25.2)    | 14.2<br>(13.9-14.4)   | 11.0<br>(10.8-11.2) | 5.2<br>(5.0-5.3)    | 2.5<br>(1.5-4.0)    |
| Serbia                 | 11.4<br>(5.6-20.8)     | 6.5<br>(3.2-11.2)     | 2.8<br>(1.5-4.5)    | 0.9<br>(0.9-1.0)    | 0.5<br>(0.4-0.6)    |
| Slovakia               | 2.5<br>(2.4-2.6)       | 2.3<br>(2.2-2.4)      | 1.1<br>(1.1-1.2)    | 0.5<br>(0.5-0.6)    | 0.4<br>(0.2-0.6)    |
| Slovenia               | 1.4<br>(0.7-2.5)       | 0.6<br>(0.3-0.9)      | 0.2<br>(0.2-0.2)    | 0.1<br>(0.1-0.1)    | 0.1<br>(0.0-0.1)    |
| Europe, Eastern        | 106.5<br>(89.1-126.1)  | 104.4<br>(88.3-124.0) | 72.5<br>(62.0-85.7) | 38.5<br>(37.0-40.0) | 23.6<br>(18.5-29.4) |
| Belarus                | 5.0<br>(3.8-6.4)       | 4.1<br>(3.2-5.1)      | 3.0<br>(2.2-3.8)    | 1.4<br>(1.1-1.8)    | 0.8<br>(0.6-1.1)    |
| Estonia                | 0.5<br>(0.4-0.5)       | 0.5<br>(0.5-0.5)      | 0.4<br>(0.4-0.4)    | 0.1<br>(0.1-0.2)    | 0.1<br>(0.0-0.1)    |
| Latvia                 | 0.7<br>(0.7-0.8)       | 0.8<br>(0.7-0.8)      | 0.7<br>(0.6-0.7)    | 0.3<br>(0.2-0.3)    | 0.1<br>(0.1-0.2)    |
| Lithuania              | 1.3<br>(1.2-1.3)       | 1.0<br>(0.9-1.1)      | 0.8<br>(0.7-0.8)    | 0.4<br>(0.4-0.4)    | 0.2<br>(0.1-0.2)    |
| Moldova                | 5.5<br>(4.2-7.2)       | 4.8<br>(4.0-5.6)      | 2.5<br>(2.2-2.9)    | 1.3<br>(1.1-1.5)    | 0.5<br>(0.4-0.7)    |
| Russia                 | 65.4<br>(51.7-83.0)    | 68.7<br>(54.4-85.7)   | 48.1<br>(37.9-61.1) | 26.0<br>(25.7-26.3) | 16.3<br>(12.6-20.7) |
| Ukraine                | 28.1<br>(21.1-35.7)    | 23.6<br>(19.4-28.6)   | 14.7<br>(12.5-16.8) | 9.0<br>(7.6-10.5)   | 5.4<br>(4.1-6.9)    |
| Europe, Western        | 154.0<br>(152.6-155.4) | 71.3<br>(70.7-72.0)   | 42.9<br>(42.3-43.6) | 24.7<br>(24.4-25.0) | 18.2<br>(15.2-21.9) |
| Andorra                | 0.0<br>(0.0-0.0)       | 0.0<br>(0.0-0.0)      | 0.0<br>(0.0-0.0)    | 0.0<br>(0.0-0.0)    | 0.0<br>(0.0-0.0)    |
| Austria                | 3.4<br>(3.3-3.5)       | 1.5<br>(1.4-1.6)      | 0.9<br>(0.8-0.9)    | 0.4<br>(0.4-0.5)    | 0.3<br>(0.3-0.4)    |
| Belgium                | 3.4<br>(3.4-3.5)       | 1.8<br>(1.7-1.8)      | 1.2<br>(1.2-1.3)    | 0.7<br>(0.6-0.7)    | 0.5<br>(0.5-0.6)    |
| Cyprus                 | 0.5<br>(0.4-0.6)       | 0.2<br>(0.2-0.3)      | 0.1<br>(0.1-0.1)    | 0.1<br>(0.1-0.1)    | 0.0<br>(0.0-0.0)    |
| Denmark                | 1.2<br>(1.2-1.3)       | 0.6<br>(0.6-0.6)      | 0.6<br>(0.5-0.6)    | 0.4<br>(0.3-0.4)    | 0.2<br>(0.2-0.3)    |
| Finland                | 1.1<br>(1.0-1.1)       | 0.6<br>(0.5-0.6)      | 0.4<br>(0.4-0.5)    | 0.2<br>(0.2-0.3)    | 0.2<br>(0.1-0.2)    |
| France                 | 15.5<br>(15.2-15.7)    | 9.7<br>(9.5-9.8)      | 6.7<br>(6.6-6.9)    | 4.1<br>(4.0-4.2)    | 3.0<br>(2.4-3.7)    |
| Germany                | 27.7<br>(27.3-28.0)    | 12.8<br>(12.6-13.0)   | 7.8<br>(7.7-8.0)    | 4.1<br>(4.0-4.2)    | 2.5<br>(2.2-2.9)    |
| Greece                 | 4.9<br>(4.9-5.0)       | 2.9<br>(2.8-2.9)      | 1.1<br>(1.1-1.1)    | 0.7<br>(0.6-0.7)    | 0.4<br>(0.4-0.5)    |
| Iceland                | 0.1<br>(0.1-0.1)       | 0.0<br>(0.0-0.0)      | 0.0<br>(0.0-0.0)    | 0.0<br>(0.0-0.0)    | 0.0<br>(0.0-0.0)    |
| Ireland                | 1.5<br>(1.4-1.5)       | 1.0<br>(1.0-1.1)      | 0.5<br>(0.5-0.5)    | 0.4<br>(0.4-0.4)    | 0.3<br>(0.2-0.4)    |
| Israel                 | 2.1                    | 1.7                   | 1.2                 | 0.9                 | 0.7                 |

|                          |                                  |                                  |                               |                               |                               |
|--------------------------|----------------------------------|----------------------------------|-------------------------------|-------------------------------|-------------------------------|
| Italy                    | (2.0-2.2)<br>30.2<br>(29.9-30.5) | (1.7-1.8)<br>10.8<br>(10.6-11.0) | (1.2-1.3)<br>5.3<br>(5.2-5.4) | (0.9-1.0)<br>2.9<br>(2.8-3.0) | (0.6-0.8)<br>2.1<br>(1.6-2.7) |
| Luxembourg               | 0.1<br>(0.1-0.1)                 | 0.1<br>(0.0-0.1)                 | 0.0<br>(0.0-0.1)              | 0.0<br>(0.0-0.0)              | 0.0<br>(0.0-0.0)              |
| Malta                    | 0.1<br>(0.1-0.2)                 | 0.1<br>(0.1-0.1)                 | 0.1<br>(0.1-0.1)              | 0.0<br>(0.0-0.0)              | 0.0<br>(0.0-0.0)              |
| Netherlands              | 3.8<br>(3.7-3.9)                 | 1.9<br>(1.8-2.0)                 | 1.7<br>(1.6-1.8)              | 1.3<br>(1.2-1.3)              | 0.7<br>(0.6-0.9)              |
| Norway                   | 1.1<br>(1.0-1.1)                 | 0.5<br>(0.5-0.5)                 | 0.5<br>(0.5-0.6)              | 0.3<br>(0.3-0.3)              | 0.2<br>(0.2-0.2)              |
| Portugal                 | 12.1<br>(12.0-12.2)              | 4.6<br>(4.5-4.7)                 | 1.7<br>(1.6-1.7)              | 0.8<br>(0.8-0.8)              | 0.3<br>(0.3-0.4)              |
| Spain                    | 21.1<br>(20.8-21.4)              | 8.6<br>(8.4-8.8)                 | 3.8<br>(3.6-3.9)              | 2.1<br>(2.0-2.2)              | 1.8<br>(1.4-2.2)              |
| Sweden                   | 1.5<br>(1.4-1.5)                 | 0.8<br>(0.8-0.9)                 | 0.9<br>(0.8-0.9)              | 0.4<br>(0.3-0.4)              | 0.3<br>(0.2-0.4)              |
| Switzerland              | 1.8<br>(1.8-1.9)                 | 0.7<br>(0.7-0.8)                 | 0.7<br>(0.7-0.7)              | 0.4<br>(0.4-0.5)              | 0.4<br>(0.3-0.4)              |
| UK                       | 19.2<br>(19.0-19.4)              | 10.5<br>(10.3-10.7)              | 7.4<br>(7.3-7.6)              | 4.4<br>(4.3-4.6)              | 3.8<br>(3.1-4.7)              |
| Latin America, Andean    | 168.1<br>(163.8-173.0)           | 127.0<br>(124.1-130.3)           | 91.7<br>(89.4-93.9)           | 56.0<br>(54.5-57.6)           | 34.0<br>(32.4-35.7)           |
| Bolivia                  | 42.2<br>(40.6-43.8)              | 33.2<br>(32.1-34.3)              | 26.8<br>(25.9-27.7)           | 18.5<br>(17.7-19.3)           | 11.4<br>(10.7-12.3)           |
| Ecuador                  | 33.0<br>(31.5-34.4)              | 23.0<br>(22.0-24.0)              | 16.6<br>(15.7-17.5)           | 12.8<br>(12.0-13.6)           | 9.4<br>(8.7-10.1)             |
| Peru                     | 93.0<br>(89.8-96.3)              | 70.8<br>(68.2-73.4)              | 48.3<br>(46.6-50.1)           | 24.8<br>(23.8-25.9)           | 13.2<br>(12.3-14.3)           |
| Latin America, Central   | 443.9<br>(431.5-457.1)           | 319.3<br>(309.6-329.4)           | 209.9<br>(201.6-218.2)        | 145.1<br>(139.0-151.4)        | 87.7<br>(80.4-96.1)           |
| Colombia                 | 69.5<br>(65.8-72.9)              | 44.4<br>(42.2-46.6)              | 30.8<br>(29.1-32.3)           | 24.7<br>(23.2-26.3)           | 16.3<br>(14.9-18.0)           |
| Costa Rica               | 4.0<br>(3.8-4.3)                 | 2.2<br>(2.1-2.4)                 | 1.8<br>(1.6-1.9)              | 1.2<br>(1.1-1.3)              | 0.8<br>(0.7-0.8)              |
| El Salvador              | 24.0<br>(22.6-25.4)              | 16.6<br>(15.7-17.6)              | 9.3<br>(8.7-10.0)             | 4.5<br>(4.2-4.9)              | 1.7<br>(1.6-1.9)              |
| Guatemala                | 40.7<br>(38.8-42.6)              | 36.5<br>(35.1-38.2)              | 26.0<br>(24.8-27.2)           | 20.7<br>(19.2-22.2)           | 13.3<br>(12.1-14.7)           |
| Honduras                 | 17.3<br>(16.2-18.6)              | 14.3<br>(13.6-15.1)              | 10.1<br>(9.6-10.6)            | 7.3<br>(6.9-7.6)              | 4.8<br>(4.4-5.2)              |
| Mexico                   | 238.8<br>(226.5-250.9)           | 167.7<br>(158.7-177.4)           | 103.3<br>(95.6-112.5)         | 67.4<br>(62.2-73.0)           | 38.1<br>(34.7-42.0)           |
| Nicaragua                | 19.5<br>(18.6-20.6)              | 15.0<br>(14.3-15.6)              | 10.1<br>(9.7-10.6)            | 5.7<br>(5.3-6.1)              | 3.3<br>(3.0-3.7)              |
| Panama                   | 3.3<br>(3.1-3.5)                 | 2.3<br>(2.1-2.5)                 | 1.8<br>(1.7-2.0)              | 1.7<br>(1.6-1.8)              | 1.4<br>(1.3-1.5)              |
| Venezuela                | 26.7<br>(26.5-27.0)              | 20.3<br>(20.1-20.6)              | 16.8<br>(16.6-17.0)           | 12.0<br>(11.8-12.1)           | 8.0<br>(7.5-8.5)              |
| Latin America, Southern  | 65.6<br>(65.1-66.1)              | 39.3<br>(38.9-39.6)              | 27.3<br>(27.0-27.6)           | 17.1<br>(16.9-17.4)           | 12.2<br>(9.1-16.4)            |
| Argentina                | 38.4<br>(38.0-38.8)              | 27.3<br>(27.0-27.6)              | 20.1<br>(19.9-20.4)           | 13.5<br>(13.3-13.7)           | 9.8<br>(7.5-12.8)             |
| Chile                    | 24.2<br>(23.9-24.4)              | 9.4<br>(9.2-9.5)                 | 5.8<br>(5.7-5.9)              | 2.8<br>(2.7-2.9)              | 1.8<br>(1.3-2.6)              |
| Uruguay                  | 3.0<br>(3.0-3.1)                 | 2.3<br>(2.2-2.3)                 | 1.3<br>(1.3-1.4)              | 0.9<br>(0.8-0.9)              | 0.5<br>(0.3-0.8)              |
| Latin America, Tropical  | 401.1<br>(381.8-421.9)           | 330.4<br>(315.4-346.9)           | 196.2<br>(186.5-207.3)        | 119.1<br>(110.8-127.1)        | 57.4<br>(52.9-62.7)           |
| Brazil                   | 394.1<br>(374.9-414.5)           | 323.9<br>(308.8-340.3)           | 190.9<br>(181.2-201.8)        | 114.7<br>(106.8-122.6)        | 54.1<br>(49.8-59.0)           |
| Paraguay                 | 7.1<br>(6.6-7.5)                 | 6.6<br>(6.2-6.9)                 | 5.3<br>(5.0-5.7)              | 4.4<br>(4.1-4.7)              | 3.4<br>(3.1-3.7)              |
| North Africa/Middle East | 1511.8<br>(1465.9-1556.7)        | 1173.9<br>(1143.8-1208.4)        | 767.2<br>(749.2-786.4)        | 459.1<br>(440.5-476.8)        | 291.4<br>(271.2-313.9)        |

|                                |                        |                        |                        |                     |                     |
|--------------------------------|------------------------|------------------------|------------------------|---------------------|---------------------|
| Algeria                        | 126.4<br>(118.0-134.8) | 93.9<br>(88.4-99.9)    | 49.9<br>(46.6-53.3)    | 24.1<br>(22.1-26.1) | 22.9<br>(20.1-26.4) |
| Bahrain                        | 0.7<br>(0.6-0.8)       | 0.3<br>(0.3-0.3)       | 0.3<br>(0.3-0.3)       | 0.2<br>(0.2-0.2)    | 0.1<br>(0.1-0.2)    |
| Egypt                          | 353.6<br>(344.9-363.2) | 262.8<br>(255.6-270.4) | 146.5<br>(141.5-151.3) | 71.4<br>(68.5-74.3) | 41.3<br>(37.2-46.1) |
| Iran                           | 274.4<br>(255.1-296.6) | 214.8<br>(199.8-230.2) | 146.1<br>(142.1-150.5) | 53.4<br>(49.0-58.0) | 27.4<br>(23.7-31.8) |
| Iraq                           | 48.4<br>(44.3-52.1)    | 38.4<br>(36.3-40.5)    | 34.7<br>(33.0-36.4)    | 35.9<br>(34.1-37.9) | 29.9<br>(27.3-33.0) |
| Jordan                         | 7.0<br>(6.7-7.4)       | 5.0<br>(4.8-5.2)       | 3.9<br>(3.7-4.0)       | 3.9<br>(3.8-4.1)    | 3.5<br>(3.2-3.9)    |
| Kuwait                         | 1.7<br>(1.7-1.8)       | 1.7<br>(1.6-1.7)       | 0.7<br>(0.7-0.7)       | 0.6<br>(0.5-0.6)    | 0.6<br>(0.6-0.6)    |
| Lebanon                        | 4.7<br>(4.2-5.1)       | 4.6<br>(4.3-4.9)       | 2.8<br>(2.6-2.9)       | 1.4<br>(1.2-1.5)    | 0.8<br>(0.7-0.9)    |
| Libya                          | 11.3<br>(10.4-12.1)    | 7.9<br>(7.3-8.5)       | 4.9<br>(4.5-5.4)       | 3.0<br>(2.6-3.3)    | 1.9<br>(1.6-2.1)    |
| Morocco                        | 120.2<br>(116.6-124.0) | 91.2<br>(88.5-94.2)    | 52.5<br>(50.4-54.6)    | 30.5<br>(28.9-32.4) | 19.4<br>(17.2-22.1) |
| Oman                           | 7.9<br>(7.3-8.5)       | 5.8<br>(5.3-6.3)       | 2.9<br>(2.5-3.2)       | 1.1<br>(1.0-1.3)    | 0.6<br>(0.5-0.7)    |
| Palestine                      | 7.7<br>(6.8-8.6)       | 4.9<br>(4.3-5.4)       | 4.2<br>(3.8-4.7)       | 3.7<br>(3.3-4.2)    | 2.6<br>(2.2-3.0)    |
| Qatar                          | 0.3<br>(0.2-0.3)       | 0.3<br>(0.2-0.3)       | 0.2<br>(0.2-0.3)       | 0.2<br>(0.2-0.2)    | 0.2<br>(0.2-0.3)    |
| Saudi Arabia                   | 38.6<br>(34.5-42.7)    | 35.2<br>(31.5-39.1)    | 25.4<br>(22.4-28.6)    | 13.1<br>(11.4-14.9) | 6.8<br>(5.9-7.9)    |
| Sudan                          | 72.0<br>(69.0-75.0)    | 88.7<br>(85.4-92.4)    | 89.1<br>(84.1-93.7)    | 86.6<br>(79.1-95.3) | 59.5<br>(52.7-67.5) |
| Syria                          | 31.4<br>(29.5-33.3)    | 24.8<br>(23.1-26.7)    | 18.9<br>(17.4-20.5)    | 10.9<br>(10.1-11.8) | 9.0<br>(8.4-9.7)    |
| Tunisia                        | 32.7<br>(31.4-34.1)    | 19.4<br>(18.6-20.2)    | 10.8<br>(10.2-11.4)    | 4.7<br>(4.3-5.0)    | 2.7<br>(2.4-3.0)    |
| Turkey                         | 272.7<br>(263.7-281.8) | 189.3<br>(183.0-196.4) | 98.8<br>(94.9-102.8)   | 54.0<br>(50.9-57.2) | 22.0<br>(19.6-24.8) |
| United Arab Emirates           | 1.0<br>(0.9-1.1)       | 1.3<br>(1.2-1.5)       | 1.0<br>(0.9-1.1)       | 0.6<br>(0.5-0.7)    | 0.9<br>(0.8-1.0)    |
| Yemen                          | 99.1<br>(95.6-102.1)   | 83.7<br>(80.9-86.5)    | 73.6<br>(71.0-76.4)    | 59.9<br>(56.7-63.0) | 38.0<br>(33.6-43.4) |
| North America, High-income     | 93.7<br>(92.9-94.4)    | 59.1<br>(58.4-59.7)    | 48.7<br>(48.2-49.1)    | 35.1<br>(34.8-35.4) | 30.1<br>(24.8-36.7) |
| Canada                         | 8.2<br>(8.0-8.3)       | 4.7<br>(4.6-4.8)       | 3.3<br>(3.2-3.4)       | 2.0<br>(2.0-2.1)    | 2.1<br>(1.7-2.6)    |
| USA                            | 85.5<br>(84.9-86.1)    | 53.9<br>(53.4-54.4)    | 45.3<br>(44.9-45.8)    | 33.0<br>(32.7-33.4) | 28.0<br>(23.1-34.2) |
| Oceania                        | 16.2<br>(13.7-18.7)    | 16.0<br>(14.1-18.0)    | 16.6<br>(14.5-18.6)    | 18.1<br>(14.3-22.3) | 14.2<br>(9.2-21.4)  |
| Federated States of Micronesia | 0.2<br>(0.2-0.3)       | 0.1<br>(0.1-0.2)       | 0.2<br>(0.1-0.2)       | 0.1<br>(0.1-0.1)    | 0.0<br>(0.0-0.1)    |
| Fiji                           | 1.1<br>(1.0-1.2)       | 1.0<br>(0.8-1.2)       | 0.7<br>(0.5-1.0)       | 0.6<br>(0.5-0.8)    | 0.6<br>(0.4-0.9)    |
| Kiribati                       | 0.3<br>(0.2-0.3)       | 0.2<br>(0.2-0.3)       | 0.2<br>(0.2-0.3)       | 0.2<br>(0.1-0.2)    | 0.1<br>(0.1-0.2)    |
| Marshall Islands               | 0.1<br>(0.1-0.2)       | 0.1<br>(0.1-0.1)       | 0.1<br>(0.1-0.1)       | 0.1<br>(0.1-0.1)    | 0.1<br>(0.0-0.1)    |
| Papua New Guinea               | 11.9<br>(9.9-14.0)     | 12.5<br>(10.8-14.4)    | 13.3<br>(11.5-15.0)    | 14.9<br>(11.6-18.5) | 12.0<br>(7.7-18.1)  |
| Samoa                          | 0.4<br>(0.3-0.4)       | 0.2<br>(0.1-0.3)       | 0.1<br>(0.1-0.2)       | 0.1<br>(0.1-0.1)    | 0.1<br>(0.0-0.1)    |
| Solomon Islands                | 0.8<br>(0.6-1.0)       | 0.6<br>(0.5-0.8)       | 0.5<br>(0.4-0.7)       | 0.5<br>(0.3-0.6)    | 0.4<br>(0.2-0.6)    |
| Tonga                          | 0.1<br>(0.1-0.2)       | 0.1<br>(0.1-0.1)       | 0.1<br>(0.1-0.1)       | 0.1<br>(0.0-0.1)    | 0.1<br>(0.0-0.1)    |
| Vanuatu                        | 0.3                    | 0.2                    | 0.2                    | 0.2                 | 0.2                 |

|                                  |                 |                 |                 |                 |                |
|----------------------------------|-----------------|-----------------|-----------------|-----------------|----------------|
|                                  | (0-2-0-4)       | (0-2-0-3)       | (0-2-0-2)       | (0-2-0-3)       | (0-2-0-3)      |
| sub-Saharan Africa, Central      | 319.2           | 352.0           | 424.8           | 524.2           | 461.4          |
|                                  | (285.7-353.4)   | (333.6-369.8)   | (409.1-440.6)   | (506.4-543.0)   | (386.8-547.7)  |
| Angola                           | 71.8            | 76.0            | 97.9            | 104.7           | 83.4           |
|                                  | (57.5-86.3)     | (68.0-85.1)     | (92.2-103.6)    | (97.4-112.3)    | (67.2-101.5)   |
| Central African Republic         | 16.2            | 17.8            | 20.9            | 23.0            | 21.5           |
|                                  | (15.0-17.3)     | (16.8-18.7)     | (19.9-21.8)     | (21.2-24.7)     | (16.8-27.6)    |
| Congo                            | 8.3             | 8.6             | 8.2             | 13.2            | 10.0           |
|                                  | (6.5-10.5)      | (7.5-9.6)       | (7.8-8.8)       | (12.4-13.9)     | (8.5-11.5)     |
| Democratic Republic of the Congo | 216.9           | 245.1           | 291.9           | 377.0           | 340.4          |
|                                  | (187.7-244.1)   | (228.9-261.3)   | (277.4-305.9)   | (360.2-395.2)   | (272.3-425.8)  |
| Equatorial Guinea                | 2.6             | 1.4             | 2.8             | 3.4             | 2.9            |
|                                  | (2.1-3.2)       | (1.2-1.6)       | (2.5-3.1)       | (3.0-3.9)       | (2.2-3.8)      |
| Gabon                            | 3.3             | 3.2             | 3.0             | 2.9             | 3.2            |
|                                  | (2.8-4.1)       | (2.9-3.4)       | (2.8-3.1)       | (2.7-3.1)       | (2.7-3.8)      |
| sub-Saharan Africa, Eastern      | 1073.0          | 1285.0          | 1449.5          | 1400.7          | 1005.0         |
|                                  | (1035.6-1109.5) | (1257.7-1311.4) | (1424.6-1475.9) | (1375.0-1427.8) | (932.7-1085.4) |
| Burundi                          | 37.8            | 43.2            | 47.8            | 50.8            | 39.1           |
|                                  | (35.5-40.2)     | (41.0-45.4)     | (45.1-50.6)     | (48.2-53.5)     | (33.2-46.3)    |
| Comoros                          | 2.0             | 2.3             | 1.9             | 1.7             | 1.2            |
|                                  | (1.8-2.3)       | (2.2-2.5)       | (1.8-2.0)       | (1.4-2.0)       | (0.9-1.6)      |
| Djibouti                         | 0.9             | 1.5             | 2.5             | 2.3             | 1.5            |
|                                  | (0.7-1.1)       | (1.3-1.8)       | (2.2-2.7)       | (2.0-2.5)       | (1.1-2.0)      |
| Eritrea                          | 18.5            | 19.9            | 21.2            | 17.6            | 13.3           |
|                                  | (16.5-20.3)     | (18.8-21.0)     | (20.2-22.2)     | (16.5-18.7)     | (9.6-18.2)     |
| Ethiopia                         | 320.1           | 408.9           | 454.0           | 409.2           | 229.3          |
|                                  | (292.7-349.7)   | (390.0-430.7)   | (434.9-473.5)   | (391.0-428.3)   | (193.4-273.0)  |
| Kenya                            | 76.1            | 80.9            | 93.0            | 112.8           | 89.5           |
|                                  | (72.1-80.2)     | (77.6-84.7)     | (88.6-97.6)     | (106.7-119.5)   | (71.4-112.8)   |
| Madagascar                       | 52.2            | 64.7            | 73.4            | 61.5            | 45.7           |
|                                  | (49.0-56.0)     | (61.8-67.7)     | (70.5-76.7)     | (58.2-64.5)     | (36.3-57.7)    |
| Malawi                           | 80.1            | 85.0            | 100.5           | 83.7            | 57.2           |
|                                  | (76.2-84.6)     | (81.2-88.9)     | (97.0-104.5)    | (80.3-87.0)     | (48.7-65.9)    |
| Mauritius                        | 1.8             | 1.0             | 0.5             | 0.4             | 0.2            |
|                                  | (1.7-1.8)       | (0.9-1.0)       | (0.5-0.5)       | (0.3-0.4)       | (0.2-0.2)      |
| Mozambique                       | 107.9           | 122.5           | 132.1           | 122.1           | 87.9           |
|                                  | (93.9-122.3)    | (116.8-128.7)   | (127.6-136.9)   | (117.7-127.0)   | (76.3-101.1)   |
| Rwanda                           | 42.3            | 55.3            | 52.5            | 49.6            | 25.7           |
|                                  | (39.8-44.8)     | (53.2-57.7)     | (50.3-54.7)     | (47.4-51.6)     | (20.8-32.1)    |
| Seychelles                       | 0.1             | 0.1             | 0.0             | 0.0             | 0.0            |
|                                  | (0.1-0.1)       | (0.1-0.1)       | (0.0-0.0)       | (0.0-0.0)       | (0.0-0.0)      |
| Somalia                          | 31.3            | 46.7            | 56.4            | 54.8            | 51.3           |
|                                  | (24.2-39.9)     | (39.6-54.6)     | (52.3-60.6)     | (51.1-59.0)     | (40.1-65.3)    |
| South Sudan                      | 46.7            | 50.9            | 53.3            | 40.8            | 41.8           |
|                                  | (36.1-60.1)     | (41.9-60.6)     | (46.2-61.6)     | (35.3-47.7)     | (33.2-53.5)    |
| Tanzania                         | 139.0           | 143.6           | 165.2           | 168.8           | 145.2          |
|                                  | (132.0-145.6)   | (137.9-149.7)   | (159.3-171.9)   | (161.1-175.6)   | (121.1-171.8)  |
| Uganda                           | 79.4            | 116.0           | 136.9           | 157.2           | 127.3          |
|                                  | (74.3-84.8)     | (111.2-121.2)   | (131.7-143.1)   | (150.6-164.2)   | (110.3-147.9)  |
| Zambia                           | 36.8            | 42.5            | 58.3            | 67.7            | 48.7           |
|                                  | (34.6-39.2)     | (40.7-44.4)     | (56.2-60.9)     | (64.6-70.6)     | (38.3-61.3)    |
| sub-Saharan Africa, Southern     | 158.8           | 152.6           | 115.8           | 133.2           | 83.2           |
|                                  | (142.5-177.3)   | (142.4-162.7)   | (109.0-123.7)   | (115.5-150.3)   | (70.7-96.7)    |
| Botswana                         | 3.2             | 2.9             | 2.6             | 3.2             | 1.5            |
|                                  | (3.0-3.5)       | (2.7-3.1)       | (2.4-2.9)       | (2.9-3.6)       | (1.1-2.0)      |
| Lesotho                          | 5.6             | 5.8             | 5.2             | 6.0             | 5.1            |
|                                  | (5.1-6.0)       | (5.4-6.3)       | (4.9-5.6)       | (5.7-6.3)       | (4.0-6.5)      |
| Namibia                          | 3.4             | 4.2             | 3.7             | 3.8             | 2.1            |
|                                  | (3.1-3.8)       | (3.9-4.4)       | (3.5-3.9)       | (3.6-4.0)       | (1.4-2.9)      |
| South Africa                     | 118.0           | 104.0           | 75.8            | 87.3            | 40.6           |
|                                  | (102.2-136.2)   | (94.1-114.0)    | (68.9-83.4)     | (70.2-104.5)    | (30.6-52.6)    |
| Swaziland                        | 3.1             | 3.3             | 2.7             | 3.5             | 2.8            |
|                                  | (2.5-3.7)       | (3.0-3.6)       | (2.5-3.0)       | (3.3-3.7)       | (2.1-3.5)      |
| Zimbabwe                         | 25.5            | 32.4            | 25.8            | 29.4            | 30.3           |
|                                  | (23.7-27.3)     | (30.8-34.2)     | (24.8-27.0)     | (27.9-30.8)     | (24.7-37.2)    |



|                             |                           |                           |                           |                           |                           |
|-----------------------------|---------------------------|---------------------------|---------------------------|---------------------------|---------------------------|
| sub-Saharan Africa, Western | 1434.3<br>(1395.1-1471.5) | 1500.3<br>(1469.5-1532.8) | 1689.1<br>(1656.3-1718.7) | 1838.3<br>(1803.3-1873.2) | 1645.9<br>(1537.4-1758.6) |
| Benin                       | 38.5<br>(36.6-40.4)       | 37.1<br>(35.6-38.6)       | 39.5<br>(37.9-40.8)       | 37.3<br>(35.9-38.8)       | 22.3<br>(20.0-24.9)       |
| Burkina Faso                | 84.6<br>(80.5-88.7)       | 82.6<br>(79.6-86.0)       | 84.3<br>(81.5-87.4)       | 94.6<br>(91.1-98.2)       | 70.6<br>(63.1-79.4)       |
| Cameroon                    | 62.6<br>(59.8-66.0)       | 69.7<br>(66.7-72.7)       | 71.2<br>(68.4-74.0)       | 89.6<br>(85.9-93.4)       | 82.5<br>(75.1-93.2)       |
| Cape Verde                  | 1.7<br>(1.6-1.7)          | 0.9<br>(0.9-0.9)          | 0.8<br>(0.8-0.8)          | 0.6<br>(0.5-0.7)          | 0.2<br>(0.2-0.3)          |
| Chad                        | 39.7<br>(36.6-43.4)       | 52.2<br>(50.3-54.6)       | 59.3<br>(57.0-61.7)       | 77.5<br>(74.1-80.7)       | 84.5<br>(74.0-98.5)       |
| Côte d'Ivoire               | 62.4<br>(59.7-65.6)       | 64.5<br>(61.6-67.3)       | 75.1<br>(72.3-78.2)       | 85.3<br>(81.6-89.1)       | 70.2<br>(63.3-79.5)       |
| Ghana                       | 70.6<br>(67.1-73.9)       | 72.0<br>(69.3-74.8)       | 68.1<br>(65.7-70.8)       | 65.5<br>(63.0-67.8)       | 56.6<br>(49.4-65.2)       |
| Guinea                      | 56.5<br>(51.9-61.1)       | 58.6<br>(56.2-61.2)       | 63.0<br>(60.6-65.3)       | 62.7<br>(60.3-65.2)       | 46.3<br>(42.4-50.3)       |
| Guinea-Bissau               | 8.2<br>(7.4-9.1)          | 9.4<br>(8.4-10.1)         | 9.9<br>(9.1-10.7)         | 10.1<br>(9.2-10.9)        | 9.6<br>(8.2-11.2)         |
| Liberia                     | 19.9<br>(18.9-20.9)       | 21.5<br>(20.6-22.6)       | 21.8<br>(20.8-22.8)       | 18.1<br>(17.3-18.9)       | 11.6<br>(9.9-13.7)        |
| Mali                        | 103.7<br>(99.7-107.6)     | 99.0<br>(95.8-102.2)      | 95.9<br>(92.6-99.3)       | 104.6<br>(100.5-108.7)    | 104.2<br>(88.5-123.0)     |
| Mauritania                  | 8.8<br>(8.2-9.3)          | 9.2<br>(8.7-9.7)          | 8.5<br>(8.0-8.9)          | 10.0<br>(9.2-10.7)        | 9.1<br>(7.7-10.8)         |
| Niger                       | 79.6<br>(76.1-83.5)       | 97.1<br>(93.5-100.4)      | 122.7<br>(118.7-126.4)    | 125.3<br>(120.7-130.0)    | 97.8<br>(88.7-108.1)      |
| Nigeria                     | 676.2<br>(641.4-711.6)    | 703.1<br>(676.7-734.9)    | 852.9<br>(825.2-880.8)    | 942.2<br>(909.7-975.4)    | 892.6<br>(796.1-991.6)    |
| Sao Tome and Principe       | 0.4<br>(0.4-0.5)          | 0.4<br>(0.4-0.4)          | 0.4<br>(0.4-0.4)          | 0.4<br>(0.4-0.4)          | 0.3<br>(0.2-0.3)          |
| Senegal                     | 60.0<br>(57.8-62.2)       | 55.5<br>(53.4-57.5)       | 46.3<br>(44.8-48.0)       | 48.3<br>(46.4-50.2)       | 31.1<br>(27.9-35.0)       |
| Sierra Leone                | 34.0<br>(30.4-37.6)       | 39.9<br>(37.3-42.5)       | 39.8<br>(38.0-41.6)       | 36.5<br>(35.1-38.1)       | 28.1<br>(24.7-32.0)       |
| The Gambia                  | 5.3<br>(4.7-5.9)          | 5.9<br>(5.4-6.4)          | 6.7<br>(6.2-7.2)          | 6.8<br>(6.3-7.4)          | 5.7<br>(4.8-6.9)          |
| Togo                        | 21.5<br>(20.4-22.8)       | 21.8<br>(20.9-22.9)       | 23.1<br>(22.1-24.1)       | 23.0<br>(21.3-24.6)       | 22.6<br>(18.9-27.2)       |

**Web table 3. Global under-5 mortality deaths from several studies.**

| <b>Web Table 3. Global number of under-5 deaths (thousands) from several studies.</b> |             |             |             |             |             |             |             |             |             |             |             |
|---------------------------------------------------------------------------------------|-------------|-------------|-------------|-------------|-------------|-------------|-------------|-------------|-------------|-------------|-------------|
| <b>Source</b>                                                                         | <b>1990</b> | <b>1995</b> | <b>2000</b> | <b>2005</b> | <b>2007</b> | <b>2008</b> | <b>2009</b> | <b>2010</b> | <b>2011</b> | <b>2012</b> | <b>2013</b> |
| GBD 2013                                                                              | 12206       | 10654       | 9328        | 7948        | 7434        | 7223        | 7016        | 6838        | 6632        | 6459        | 6275        |
| GBD 2010                                                                              | 11560       | 10705       | 9357        | 7842        | 7350        | 7166        | 6993        | 6842        |             |             |             |
| Lozano et al, 2011                                                                    | 11600       | 10700       | 9332        | 8120        | 7735        | 7580        | 7432        | 7308        |             |             |             |
| Rajaratnam et al, 2010                                                                | 11862       | 10855       | 9577        | 8440        | 8098        | 7951        | 7817        | 7693        |             |             |             |
| Murray et al, 2007                                                                    | 12121       | 11185       | 10314       | 9720        |             |             |             |             |             |             |             |
| UNICEF, 2013                                                                          | 12621       | 10854       | 9699        | 8234        |             |             |             | 6998        |             | 6553        |             |
| UNICEF, 2012                                                                          | 11968       | 10770       | 9562        | 8198        |             |             |             | 7148        | 6914        |             |             |
| UNICEF, 2011                                                                          | 12010       | 10702       | 9575        | 8467        |             |             | 7756        | 7614        |             |             |             |
| UNICEF, 2010                                                                          | 12393       | 11373       | 10169       | 8973        | 8521        | 8299        | 8087        |             |             |             |             |
| UNICEF, 2009                                                                          | 12500       | 11400       | 10400       | 9300        | 8900        | 8800        |             |             |             |             |             |

Web table 4. Data source list of child mortality data sources used in the GBD 2013.

| <b>Web Table 4: Data source list of child mortality data sources used in the GBD 2013.</b>                                                                                      |               |                                                                                  |            |    |     |     |
|---------------------------------------------------------------------------------------------------------------------------------------------------------------------------------|---------------|----------------------------------------------------------------------------------|------------|----|-----|-----|
| VR/SRS/DSP = Vital registration, sample registration system, and disease surveillance points. HH = Household deaths. CBH = Complete birth history. SBH = Summary birth history. |               |                                                                                  |            |    |     |     |
| Country                                                                                                                                                                         | Source number | Source                                                                           | VR/SRS/DSP | HH | CBH | SBH |
| Afghanistan                                                                                                                                                                     |               |                                                                                  |            |    |     |     |
|                                                                                                                                                                                 | (AFG-01)      | 1972 National Demographic and Family Guidance Survey                             |            |    |     | x   |
|                                                                                                                                                                                 | (AFG-02)      | 1979 Census                                                                      |            | x  |     |     |
|                                                                                                                                                                                 | (AFG-03)      | 2000 Multiple Indicator Cluster Survey                                           |            |    |     | x   |
|                                                                                                                                                                                 | (AFG-04)      | 2003 Multiple Indicator Cluster Survey                                           |            |    |     | x   |
|                                                                                                                                                                                 | (AFG-05)      | 2006 Afghanistan Health Survey                                                   |            |    |     | x   |
|                                                                                                                                                                                 | (AFG-06)      | 2008 National Risk and Vulnerability Assessment                                  |            |    |     | x   |
|                                                                                                                                                                                 | (AFG-07)      | 2010 Multiple Indicator Cluster Survey                                           |            |    |     | x   |
|                                                                                                                                                                                 | (AFG-08)      | 2010 Special Demographic and Health Survey                                       |            |    | x   | x   |
| Albania                                                                                                                                                                         |               |                                                                                  |            |    |     |     |
|                                                                                                                                                                                 | (ALB-01)      | 1950, 1955, 1957-64, 1987-07 Vital Registration                                  | x          |    |     |     |
|                                                                                                                                                                                 | (ALB-02)      | 2000 Multiple Indicator Cluster Survey                                           |            |    |     | x   |
|                                                                                                                                                                                 | (ALB-03)      | 2002 Reproductive Health Survey                                                  |            |    | x   | x   |
|                                                                                                                                                                                 | (ALB-04)      | 2005 Multiple Indicator Cluster Survey                                           |            |    |     | x   |
|                                                                                                                                                                                 | (ALB-05)      | 2008-09 Standard Demographic and Health Survey                                   |            |    | x   | x   |
|                                                                                                                                                                                 | (ALB-06)      | 2011 Census                                                                      |            |    |     | x   |
| Algeria                                                                                                                                                                         |               |                                                                                  |            |    |     |     |
|                                                                                                                                                                                 | (DZA-01)      | 1950-56, 1964-65, 1980-82, 1985-86, 1990, 1998, 2000, 2007-09 Vital Registration | x          |    |     |     |
|                                                                                                                                                                                 | (DZA-02)      | 1970 Fertility Survey                                                            |            |    |     | x   |
|                                                                                                                                                                                 | (DZA-03)      | 1986 National Fertility Survey                                                   |            |    | x   |     |
|                                                                                                                                                                                 | (DZA-04)      | 1992 Pan Arab Project for Child Development                                      |            |    | x   | x   |
|                                                                                                                                                                                 | (DZA-05)      | 1998 Census                                                                      |            |    |     | x   |
|                                                                                                                                                                                 | (DZA-06)      | 2000 Multiple Indicator Cluster Survey                                           |            |    |     | x   |
|                                                                                                                                                                                 | (DZA-07)      | 2002-03 Pan Arab Project for Family Health                                       |            |    | x   | x   |
|                                                                                                                                                                                 | (DZA-08)      | 2010-11 Vital Registration (Report)                                              | x          |    |     |     |
| Andorra                                                                                                                                                                         |               |                                                                                  |            |    |     |     |
|                                                                                                                                                                                 | (AND-01)      | 1950-54, 1992, 1994, 2002-05, 2007-10 Vital Registration                         | x          |    |     |     |
| Angola                                                                                                                                                                          |               |                                                                                  |            |    |     |     |
|                                                                                                                                                                                 | (AGO-01)      | 1996 Multiple Indicator Cluster Survey (Report)                                  |            |    |     | x   |
|                                                                                                                                                                                 | (AGO-02)      | 2001 Multiple Indicator Cluster Survey                                           |            |    |     | x   |
|                                                                                                                                                                                 | (AGO-03)      | 2006-07 Malaria Indicator Survey                                                 |            |    | x   | x   |
|                                                                                                                                                                                 | (AGO-04)      | 2008 Integrated Inquiry into People's Well-Being                                 |            | x  |     |     |
|                                                                                                                                                                                 | (AGO-05)      | 2011 Malaria Indicator Survey                                                    |            |    | x   | x   |
| Antigua and Barbuda                                                                                                                                                             |               |                                                                                  |            |    |     |     |
|                                                                                                                                                                                 | (ATG-01)      | 1950-66, 1969-78, 1983, 1985-09 Vital Registration                               | x          |    |     |     |

|            |          |                                                         |   |   |   |   |
|------------|----------|---------------------------------------------------------|---|---|---|---|
| Argentina  |          |                                                         |   |   |   |   |
|            | (ARG-01) | 1950-70, 1976-11 Vital Registration                     | x |   |   |   |
|            | (ARG-02) | 1970 Census                                             |   |   |   | x |
|            | (ARG-03) | 1980 Census                                             |   |   |   | x |
|            | (ARG-04) | 1991 Census                                             |   |   |   | x |
| Armenia    |          |                                                         |   |   |   |   |
|            | (ARM-01) | 1981-12 Vital Registration                              | x |   |   |   |
|            | (ARM-02) | 2000 Standard Demographic and Health Survey             |   |   | x | x |
|            | (ARM-03) | 2001 Census                                             |   |   |   | x |
|            | (ARM-04) | 2005 Standard Demographic and Health Survey             |   |   | x | x |
|            | (ARM-05) | 2010 Standard Demographic and Health Survey             |   |   | x | x |
| Australia  |          |                                                         |   |   |   |   |
|            | (AUS-01) | 1950-11 Vital Registration                              | x |   |   |   |
| Austria    |          |                                                         |   |   |   |   |
|            | (AUT-01) | 1950-11 Vital Registration                              | x |   |   |   |
| Azerbaijan |          |                                                         |   |   |   |   |
|            | (AZE-01) | 1981-10 Vital Registration                              | x |   |   |   |
|            | (AZE-02) | 2000 Multiple Indicator Cluster Survey                  |   |   |   | x |
|            | (AZE-03) | 2001 Reproductive Health Survey                         |   |   | x |   |
|            | (AZE-04) | 2006 Standard Demographic and Health Survey             |   |   | x | x |
| Bahrain    |          |                                                         |   |   |   |   |
|            | (BHR-01) | 1971 Census                                             |   |   |   | x |
|            | (BHR-02) | 1980-82, 1984-93, 1995-09, 2012 Vital Registration      | x |   |   |   |
|            | (BHR-03) | 1981 Census                                             |   |   |   | x |
|            | (BHR-04) | 1989 Child Health Survey                                |   |   | x |   |
|            | (BHR-05) | 1991 Census                                             |   |   |   | x |
|            | (BHR-06) | 1995 Gulf Family Health Survey                          |   |   | x |   |
|            | (BHR-07) | 2001 Census                                             |   |   |   | x |
| Bangladesh |          |                                                         |   |   |   |   |
|            | (BGD-01) | 1962-65 Population Growth Estimation Experiment         |   | x |   |   |
|            | (BGD-02) | 1974 Retrospective Survey of Fertility and Mortality    |   |   |   | x |
|            | (BGD-03) | 1975-76 World Fertility Survey                          |   |   | x | x |
|            | (BGD-04) | 1980-02, 2004, 2006 Sample Registration System          | x |   |   |   |
|            | (BGD-05) | 1981 Contraceptive Prevalence Survey                    |   |   |   | x |
|            | (BGD-06) | 1985-86 Contraceptive Prevalence Survey                 |   |   |   | x |
|            | (BGD-07) | 1988-89 Fertility Survey                                |   |   | x |   |
|            | (BGD-08) | 1993-94 Standard Demographic and Health Survey          |   |   | x | x |
|            | (BGD-09) | 1996-97 Standard Demographic and Health Survey          |   |   | x | x |
|            | (BGD-10) | 1999-00 Standard Demographic and Health Survey          |   |   | x | x |
|            | (BGD-11) | 2001 Special Demographic and Health Survey              |   |   | x | x |
|            | (BGD-12) | 2003, 2005, 2007-10 Sample Registration System (Report) | x |   |   |   |
|            | (BGD-13) | 2004 Standard Demographic and Health Survey             |   |   | x | x |
|            | (BGD-14) | 2007 Standard Demographic and Health Survey             |   |   | x | x |
|            | (BGD-15) | 2011-12 Standard Demographic and Health Survey          |   |   | x | x |
| Barbados   |          |                                                         |   |   |   |   |

|         |          |                                                       |   |   |   |   |
|---------|----------|-------------------------------------------------------|---|---|---|---|
|         | (BRB-01) | 1950-95, 2000-08 Vital Registration                   | x |   |   |   |
| Belarus |          |                                                       |   |   |   |   |
|         | (BLR-01) | 1959-11 Vital Registration                            | x |   |   |   |
|         | (BLR-02) | 1989 Census                                           |   |   |   | x |
|         | (BLR-03) | 1999 Census                                           |   |   |   | x |
|         | (BLR-04) | 2005 Multiple Indicator Cluster Survey                |   |   |   | x |
| Belgium |          |                                                       |   |   |   |   |
|         | (BEL-01) | 1950-10 Vital Registration                            | x |   |   |   |
|         | (BEL-02) | 1961 Census                                           |   |   |   | x |
|         | (BEL-03) | 1970 Census                                           |   |   |   | x |
| Belize  |          |                                                       |   |   |   |   |
|         | (BLZ-01) | 1950-09 Vital Registration                            | x |   |   |   |
|         | (BLZ-02) | 1991 Census                                           |   |   |   | x |
|         | (BLZ-03) | 1991 Reproductive Health Survey                       |   |   | x | x |
|         | (BLZ-04) | 1999 Reproductive Health Survey                       |   |   | x | x |
|         | (BLZ-05) | 2000 Census                                           |   |   |   | x |
|         | (BLZ-06) | 2006 Multiple Indicator Cluster Survey                |   |   |   | x |
|         | (BLZ-07) | 2011 Multiple Indicator Cluster Survey                |   |   |   | x |
| Benin   |          |                                                       |   |   |   |   |
|         | (BEN-01) | 1981-82 World Fertility Survey                        |   |   | x | x |
|         | (BEN-02) | 1981-83 Multi-Round Survey                            |   |   | x |   |
|         | (BEN-03) | 1992 Census                                           |   | x |   | x |
|         | (BEN-04) | 1996 Standard Demographic and Health Survey           |   |   | x | x |
|         | (BEN-05) | 2001 Standard Demographic and Health Survey           |   |   | x | x |
|         | (BEN-06) | 2002 Census                                           |   | x |   |   |
|         | (BEN-07) | 2006 Standard Demographic and Health Survey           |   |   | x | x |
|         | (BEN-08) | 2011-12 Standard Demographic and Health Survey        |   |   | x | x |
| Bhutan  |          |                                                       |   |   |   |   |
|         | (BTN-01) | 1984 Demographic Sample Survey                        |   |   | x | x |
|         | (BTN-02) | 1994 National Health Survey                           |   |   | x |   |
|         | (BTN-03) | 2000 National Health Survey                           |   |   | x |   |
|         | (BTN-04) | 2005 Census                                           |   | x |   | x |
|         | (BTN-05) | 2010 Multiple Indicator Cluster Survey                |   |   |   | x |
| Bolivia |          |                                                       |   |   |   |   |
|         | (BOL-01) | 1951-58, 1965-66, 1976-77, 2000-03 Vital Registration | x |   |   |   |
|         | (BOL-02) | 1976 Census                                           |   |   |   | x |
|         | (BOL-03) | 1980 National Demographic Survey                      |   |   |   | x |
|         | (BOL-04) | 1988 Sample Survey                                    |   |   |   | x |
|         | (BOL-05) | 1989 Standard Demographic and Health Survey           |   |   | x | x |
|         | (BOL-06) | 1992 Census                                           |   |   |   | x |
|         | (BOL-07) | 1993-94 Standard Demographic and Health Survey        |   |   | x | x |
|         | (BOL-08) | 1998 Standard Demographic and Health Survey           |   |   | x | x |
|         | (BOL-09) | 2000 Household Survey                                 |   |   |   | x |
|         | (BOL-10) | 2000 Multiple Indicator Cluster Survey                |   |   |   | x |
|         | (BOL-11) | 2001 Census                                           |   |   |   | x |

|                               |          |                                                       |   |   |   |   |
|-------------------------------|----------|-------------------------------------------------------|---|---|---|---|
|                               | (BOL-12) | 2003-04 Standard Demographic and Health Survey        |   |   | x | x |
|                               | (BOL-13) | 2008 Standard Demographic and Health Survey           |   |   | x | x |
| <b>Bosnia and Herzegovina</b> |          |                                                       |   |   |   |   |
|                               | (BIH-01) | 1985-91, 1998-11 Vital Registration                   | x |   |   |   |
|                               | (BIH-02) | 2011 Multiple Indicator Cluster Survey                |   |   |   | x |
| <b>Botswana</b>               |          |                                                       |   |   |   |   |
|                               | (BWA-01) | 1971 Census                                           |   |   |   | x |
|                               | (BWA-02) | 1981 Census                                           |   |   |   | x |
|                               | (BWA-03) | 1984 Family Health Survey                             |   |   |   | x |
|                               | (BWA-04) | 1988 Standard Demographic and Health Survey           |   |   | x | x |
|                               | (BWA-05) | 1991 Census                                           |   |   |   | x |
|                               | (BWA-06) | 1996 Family Health Survey                             |   |   |   | x |
|                               | (BWA-07) | 2000 Multiple Indicator Cluster Survey                |   |   |   | x |
|                               | (BWA-08) | 2001 Census                                           |   | x |   | x |
|                               | (BWA-09) | 2007 Demographic Survey                               |   | x |   | x |
|                               | (BWA-10) | 2007 Family Health Survey                             |   | x | x | x |
| <b>Brazil</b>                 |          |                                                       |   |   |   |   |
|                               | (BRA-01) | 1960 Census                                           |   |   |   | x |
|                               | (BRA-02) | 1970 Census                                           |   |   |   | x |
|                               | (BRA-03) | 1974-11 Vital Registration                            | x |   |   |   |
|                               | (BRA-04) | 1980 Census                                           |   |   |   | x |
|                               | (BRA-05) | 1984 National Health Survey                           |   |   |   | x |
|                               | (BRA-06) | 1986 National Health Survey                           |   |   |   | x |
|                               | (BRA-07) | 1986 Standard Demographic and Health Survey           |   |   | x | x |
|                               | (BRA-08) | 1991 Census                                           |   |   |   | x |
|                               | (BRA-09) | 1996-97 Living Standards Measurement Study            |   |   |   | x |
|                               | (BRA-10) | 1996 Standard Demographic and Health Survey           |   |   | x | x |
|                               | (BRA-11) | 2000 Census                                           |   |   |   | x |
|                               | (BRA-12) | 2004 National Household Sample Survey                 |   |   |   | x |
|                               | (BRA-13) | 2005 National Household Sample Survey                 |   |   |   | x |
|                               | (BRA-14) | 2006 National Household Sample Survey                 |   |   |   | x |
|                               | (BRA-15) | 2007 National Household Sample Survey                 |   |   |   | x |
|                               | (BRA-16) | 2008 National Household Sample Survey                 |   |   |   | x |
|                               | (BRA-17) | 2009 National Household Sample Survey                 |   |   |   | x |
|                               | (BRA-18) | 2010 Census                                           |   | x |   | x |
| <b>Brunei</b>                 |          |                                                       |   |   |   |   |
|                               | (BRN-01) | 1950-59, 1964-78, 1982-92, 1995-11 Vital Registration | x |   |   |   |
|                               | (BRN-02) | 1960 Census                                           |   |   |   | x |
| <b>Bulgaria</b>               |          |                                                       |   |   |   |   |
|                               | (BGR-01) | 1950-12 Vital Registration                            | x |   |   |   |
|                               | (BGR-02) | 1965 Census                                           |   |   |   | x |
|                               | (BGR-03) | 1975 Census                                           |   |   |   | x |
|                               | (BGR-04) | 1995 Living Standards Measurement Study               |   |   |   | x |
|                               | (BGR-05) | 1997 Living Standards Measurement Study               |   |   |   | x |

|              |          |                                                                  |   |   |   |   |
|--------------|----------|------------------------------------------------------------------|---|---|---|---|
| Burkina Faso |          |                                                                  |   |   |   |   |
|              | (BFA-01) | 1960-61 Sample Demographic Survey in the Republic of Upper Volta |   | x |   |   |
|              | (BFA-02) | 1976 Post-enumeration Survey                                     |   |   |   | x |
|              | (BFA-03) | 1985 Census                                                      |   | x |   | x |
|              | (BFA-04) | 1992-93 Standard Demographic and Health Survey                   |   |   | x | x |
|              | (BFA-05) | 1996 Census                                                      |   | x |   |   |
|              | (BFA-06) | 1998-99 Standard Demographic and Health Survey                   |   |   | x | x |
|              | (BFA-07) | 2003 Standard Demographic and Health Survey                      |   |   | x | x |
|              | (BFA-08) | 2006 Census                                                      |   | x |   | x |
|              | (BFA-09) | 2006 Multiple Indicator Cluster Survey                           |   |   |   | x |
|              | (BFA-10) | 2010-11 Standard Demographic and Health Survey                   |   |   | x | x |
| Burma        |          |                                                                  |   |   |   |   |
|              | (MMR-01) | 1983 Census                                                      |   |   |   | x |
|              | (MMR-02) | 1991 Population Changes and Fertility Survey                     |   | x | x |   |
|              | (MMR-03) | 1997 Fertility and Reproductive Health Survey                    |   |   | x | x |
|              | (MMR-04) | 1999 National Mortality Survey                                   |   |   | x |   |
|              | (MMR-05) | 2001 Fertility and Reproductive Health Survey                    |   | x |   | x |
|              | (MMR-06) | 2003 Overall and Cause-Specific Under-Five Mortality Survey      |   | x |   |   |
|              | (MMR-07) | 2005 Vital Registration                                          | x |   |   |   |
|              | (MMR-08) | 2007 Fertility and Reproductive Health Survey                    |   |   |   | x |
|              | (MMR-09) | 2010 Multiple Indicator Cluster Survey                           |   |   | x |   |
| Burundi      |          |                                                                  |   |   |   |   |
|              | (BDI-01) | 1970-71 Demographic Survey                                       |   |   | x | x |
|              | (BDI-02) | 1979 Post-Census Survey                                          |   |   |   | x |
|              | (BDI-03) | 1987 Standard Demographic and Health Survey                      |   |   | x | x |
|              | (BDI-04) | 1990 Census                                                      |   |   |   | x |
|              | (BDI-05) | 2000 Multiple Indicator Cluster Survey                           |   |   |   | x |
|              | (BDI-06) | 2005 Multiple Indicator Cluster Survey                           |   |   |   | x |
|              | (BDI-07) | 2010-11 Standard Demographic and Health Survey                   |   |   | x | x |
|              | (BDI-08) | 2012 Malaria Indicator Survey                                    |   |   |   | x |
| Cambodia     |          |                                                                  |   |   |   |   |
|              | (KHM-01) | 1959 Demographic Survey                                          |   | x |   |   |
|              | (KHM-02) | 1996 Socioeconomic Survey                                        |   | x |   |   |
|              | (KHM-03) | 1997 Socioeconomic Survey                                        |   |   |   | x |
|              | (KHM-04) | 1998 Census                                                      |   |   |   | x |
|              | (KHM-05) | 1998 Special Demographic and Health Survey                       |   |   | x | x |
|              | (KHM-06) | 1999 Socioeconomic Survey                                        |   |   |   | x |
|              | (KHM-07) | 2000 Standard Demographic and Health Survey                      |   |   | x | x |
|              | (KHM-08) | 2004 Socioeconomic Survey                                        |   |   |   | x |
|              | (KHM-09) | 2005-06 Standard Demographic and Health Survey                   |   |   | x | x |
|              | (KHM-10) | 2008 Census                                                      |   | x |   | x |
|              | (KHM-11) | 2010-11 Standard Demographic and Health Survey                   |   |   | x | x |
| Cameroon     |          |                                                                  |   |   |   |   |
|              | (CMR-01) | 1976 Census                                                      |   | x |   |   |
|              | (CMR-02) | 1978 World Fertility Survey                                      |   |   | x | x |

|                          |          |                                                                         |   |   |   |   |
|--------------------------|----------|-------------------------------------------------------------------------|---|---|---|---|
|                          | (CMR-03) | 1987 Census                                                             |   | x |   |   |
|                          | (CMR-04) | 1991 Standard Demographic and Health Survey                             |   |   | x | x |
|                          | (CMR-05) | 1998 Standard Demographic and Health Survey                             |   |   | x | x |
|                          | (CMR-06) | 2000 Multiple Indicator Cluster Survey                                  |   |   |   | x |
|                          | (CMR-07) | 2004 Standard Demographic and Health Survey                             |   |   | x | x |
|                          | (CMR-08) | 2005 Census                                                             |   |   |   | x |
|                          | (CMR-09) | 2011 Standard Demographic and Health Survey                             |   |   | x | x |
| Canada                   |          |                                                                         |   |   |   |   |
|                          | (CAN-01) | 1950-09 Vital Registration                                              | x |   |   |   |
|                          | (CAN-02) | 2010-11 Vital Registration (Report)                                     | x |   |   |   |
| Cape Verde               |          |                                                                         |   |   |   |   |
|                          | (CPV-01) | 1955-57, 1959-60, 1966-75, 1979-80, 1983-85, 1990-91 Vital Registration | x |   |   |   |
|                          | (CPV-02) | 1998 Reproductive Health Survey                                         |   |   | x | x |
|                          | (CPV-03) | 2000 Census                                                             |   |   | x | x |
|                          | (CPV-04) | 2005 Standard Demographic and Health Survey (Report)                    |   |   | x | x |
| Central African Republic |          |                                                                         |   |   |   |   |
|                          | (CAF-01) | 1975 Census                                                             |   |   |   | x |
|                          | (CAF-02) | 1988 Census                                                             |   | x |   | x |
|                          | (CAF-03) | 1994-95 Standard Demographic and Health Survey                          |   |   | x | x |
|                          | (CAF-04) | 2000 Multiple Indicator Cluster Survey                                  |   |   |   | x |
|                          | (CAF-05) | 2006 Multiple Indicator Cluster Survey                                  |   |   |   | x |
|                          | (CAF-06) | 2010 Multiple Indicator Cluster Survey                                  |   |   |   | x |
| Chad                     |          |                                                                         |   |   |   |   |
|                          | (TCD-01) | 1993 Census                                                             |   |   |   | x |
|                          | (TCD-02) | 1996-97 Standard Demographic and Health Survey                          |   |   | x | x |
|                          | (TCD-03) | 2000 Multiple Indicator Cluster Survey                                  |   |   |   | x |
|                          | (TCD-04) | 2004 Standard Demographic and Health Survey                             |   |   | x | x |
|                          | (TCD-05) | 2010 Multiple Indicator Cluster Survey                                  |   |   |   | x |
| Chile                    |          |                                                                         |   |   |   |   |
|                          | (CHL-01) | 1950-11 Vital Registration                                              | x |   |   |   |
|                          | (CHL-02) | 1970 Census                                                             |   |   |   | x |
|                          | (CHL-03) | 1982 Census                                                             |   |   |   | x |
|                          | (CHL-04) | 1992 Census                                                             |   |   |   | x |
|                          | (CHL-05) | 2002 Census                                                             |   |   |   | x |
| China                    |          |                                                                         |   |   |   |   |
|                          | (CHN-01) | 1975 Survey of Cancer Epidemiology                                      |   | x |   |   |
|                          | (CHN-02) | 1982 Census                                                             |   | x |   | x |
|                          | (CHN-03) | 1982 National 1 per 1000 Fertility Survey                               |   |   |   | x |
|                          | (CHN-04) | 1986 Sample Survey on Population Change                                 |   | x |   |   |
|                          | (CHN-05) | 1988 Fertility Sampling Survey in China                                 |   | x |   |   |
|                          | (CHN-06) | 1990 Census                                                             |   | x |   | x |
|                          | (CHN-07) | 1991 National Survey on Child Mortality                                 |   | x |   |   |
|                          | (CHN-08) | 1992-13 National Maternal and Child Health Surveillance System          | x |   |   |   |
|                          | (CHN-09) | 1992 Fertility Sampling Survey in China                                 |   | x |   |   |



|          |          |                                                                            |   |   |   |   |
|----------|----------|----------------------------------------------------------------------------|---|---|---|---|
|          | (CHN-10) | 1994 Sample Survey on Population Change                                    |   | x |   |   |
|          | (CHN-11) | 1995 1% Intra-Census Survey                                                |   | x |   | x |
|          | (CHN-12) | 1996-00, 2004-10 Disease Surveillance Points                               | x |   |   |   |
|          | (CHN-13) | 1996 Ministry of Health Routine Reporting for Maternal and Child Mortality |   | x |   |   |
|          | (CHN-14) | 1996 Sample Survey on Population Change                                    |   | x |   |   |
|          | (CHN-15) | 1997 Ministry of Health Routine Reporting for Maternal and Child Mortality |   | x |   |   |
|          | (CHN-16) | 1997 Sample Survey on Population Change                                    |   | x |   |   |
|          | (CHN-17) | 1998 Ministry of Health Routine Reporting for Maternal and Child Mortality |   | x |   |   |
|          | (CHN-18) | 1998 Sample Survey on Population Change                                    |   | x |   |   |
|          | (CHN-19) | 1999 Ministry of Health Routine Reporting for Maternal and Child Mortality |   | x |   |   |
|          | (CHN-20) | 1999 Sample Survey on Population Change                                    |   | x |   |   |
|          | (CHN-21) | 2000 Census                                                                |   | x |   | x |
|          | (CHN-22) | 2000 Ministry of Health Routine Reporting for Maternal and Child Mortality |   | x |   |   |
|          | (CHN-23) | 2001 Ministry of Health Routine Reporting for Maternal and Child Mortality |   | x |   |   |
|          | (CHN-24) | 2001 Sample Survey on Population Change                                    |   | x |   |   |
|          | (CHN-25) | 2002 Ministry of Health Routine Reporting for Maternal and Child Mortality |   | x |   |   |
|          | (CHN-26) | 2002 Sample Survey on Population Change                                    |   | x |   |   |
|          | (CHN-27) | 2003 Ministry of Health Routine Reporting for Maternal and Child Mortality |   | x |   |   |
|          | (CHN-28) | 2003 Sample Survey on Population Change                                    |   | x |   |   |
|          | (CHN-29) | 2004 Ministry of Health Routine Reporting for Maternal and Child Mortality |   | x |   |   |
|          | (CHN-30) | 2004 Sample Survey on Population Change                                    |   | x |   |   |
|          | (CHN-31) | 2005 1% Intra-Census Survey                                                |   | x |   |   |
|          | (CHN-32) | 2005 Ministry of Health Routine Reporting for Maternal and Child Mortality |   | x |   |   |
|          | (CHN-33) | 2006 Ministry of Health Routine Reporting for Maternal and Child Mortality |   | x |   |   |
|          | (CHN-34) | 2006 Sample Survey on Population Change                                    |   | x |   |   |
|          | (CHN-35) | 2007 Ministry of Health Routine Reporting for Maternal and Child Mortality |   | x |   |   |
|          | (CHN-36) | 2007 Sample Survey on Population Change                                    |   | x |   |   |
|          | (CHN-37) | 2008 Ministry of Health Routine Reporting for Maternal and Child Mortality |   | x |   |   |
|          | (CHN-38) | 2008 Sample Survey on Population Change                                    |   | x |   |   |
|          | (CHN-39) | 2009 Ministry of Health Routine Reporting for Maternal and Child Mortality |   | x |   |   |
|          | (CHN-40) | 2009 Sample Survey on Population Change                                    |   | x |   |   |
|          | (CHN-41) | 2010 Census                                                                |   | x |   | x |
|          | (CHN-42) | 2010 Ministry of Health Routine Reporting for Maternal and Child Mortality |   | x |   |   |
|          | (CHN-43) | 2011 Ministry of Health Routine Reporting for Maternal and Child Mortality |   | x |   |   |
|          | (CHN-44) | 2012 Ministry of Health Routine Reporting for Maternal and Child Mortality |   | x |   |   |
| Colombia |          |                                                                            |   |   |   |   |
|          | (COL-01) | 1950-77, 1979-80, 1982-09, 2011 Vital Registration                         | x |   |   |   |
|          | (COL-02) | 1973 Census                                                                |   |   |   | x |
|          | (COL-03) | 1976 World Fertility Survey                                                |   |   | x | x |
|          | (COL-04) | 1985 Census                                                                |   |   |   | x |
|          | (COL-05) | 1986 Standard Demographic and Health Survey                                |   |   | x | x |
|          | (COL-06) | 1990 Standard Demographic and Health Survey                                |   |   | x | x |
|          | (COL-07) | 1993 Census                                                                |   |   |   | x |
|          | (COL-08) | 1995 Standard Demographic and Health Survey                                |   |   | x | x |
|          | (COL-09) | 2000 Standard Demographic and Health Survey                                |   |   | x | x |

|               |          |                                                      |   |   |   |   |
|---------------|----------|------------------------------------------------------|---|---|---|---|
|               | (COL-10) | 2004-05 Standard Demographic and Health Survey       |   |   | x | x |
|               | (COL-11) | 2005 Census                                          |   |   |   | x |
|               | (COL-12) | 2009-10 Standard Demographic and Health Survey       |   |   | x | x |
| Comoros       |          |                                                      |   |   |   |   |
|               | (COM-01) | 1958 Census                                          |   | x |   |   |
|               | (COM-02) | 1980 Census                                          |   |   |   | x |
|               | (COM-03) | 1996 Standard Demographic and Health Survey          |   |   | x | x |
|               | (COM-04) | 2000 Multiple Indicator Cluster Survey               |   |   |   | x |
|               | (COM-05) | 2012 Standard Demographic and Health Survey (Report) |   |   | x |   |
| Congo         |          |                                                      |   |   |   |   |
|               | (COG-01) | 1974 Census                                          |   |   |   | x |
|               | (COG-02) | 2005 Standard Demographic and Health Survey          |   |   | x | x |
|               | (COG-03) | 2009 AIDS Indicator Survey                           |   |   |   | x |
|               | (COG-04) | 2011-12 Standard Demographic and Health Survey       |   |   | x | x |
| Costa Rica    |          |                                                      |   |   |   |   |
|               | (CRI-01) | 1950, 1952-11 Vital Registration                     | x |   |   |   |
|               | (CRI-02) | 1973 Census                                          |   |   |   | x |
|               | (CRI-03) | 1976 World Fertility Survey                          |   |   | x | x |
|               | (CRI-04) | 1981 Contraceptive Prevalence Survey                 |   |   |   | x |
|               | (CRI-05) | 1984 Census                                          |   |   |   | x |
|               | (CRI-06) | 1986 Reproductive Health Survey                      |   |   | x | x |
|               | (CRI-07) | 1992-93 Reproductive Health Survey                   |   |   | x | x |
|               | (CRI-08) | 2000 Census                                          |   |   |   | x |
|               | (CRI-09) | 2011 Census                                          |   |   |   | x |
| Cote d'Ivoire |          |                                                      |   |   |   |   |
|               | (CIV-01) | 1978 Demographic Survey                              |   |   | x | x |
|               | (CIV-02) | 1980-81 World Fertility Survey                       |   |   | x | x |
|               | (CIV-03) | 1994 Standard Demographic and Health Survey          |   |   | x | x |
|               | (CIV-04) | 1998-99 Standard Demographic and Health Survey       |   |   | x | x |
|               | (CIV-05) | 1998 Census                                          |   | x |   |   |
|               | (CIV-06) | 2005 AIDS Indicator Survey                           |   |   | x | x |
|               | (CIV-07) | 2011-12 Standard Demographic and Health Survey       |   |   | x | x |
| Croatia       |          |                                                      |   |   |   |   |
|               | (HRV-01) | 1985-12 Vital Registration                           | x |   |   |   |
| Cuba          |          |                                                      |   |   |   |   |
|               | (CUB-01) | 1959-10 Vital Registration                           | x |   |   |   |
|               | (CUB-02) | 1974 Income and Expenditure Survey                   |   |   |   | x |
|               | (CUB-03) | 1981 Census                                          |   |   |   | x |
|               | (CUB-04) | 1987 National Fertility Survey                       |   |   |   | x |
|               | (CUB-05) | 2010 Multiple Indicator Cluster Survey               |   |   |   | x |
| Cyprus        |          |                                                      |   |   |   |   |
|               | (CYP-01) | 1960 Census                                          |   |   |   | x |
|               | (CYP-02) | 1973 Census                                          |   |   |   | x |
|               | (CYP-03) | 1974-11 Vital Registration                           | x |   |   |   |
|               | (CYP-04) | 1992 Census                                          |   |   |   | x |

|                                  |          |                                                      |   |   |   |   |
|----------------------------------|----------|------------------------------------------------------|---|---|---|---|
| Czech Republic                   |          |                                                      |   |   |   |   |
|                                  | (CZE-01) | 1950-12 Vital Registration                           | x |   |   |   |
|                                  | (CZE-02) | 1991 Census                                          |   |   |   | x |
|                                  | (CZE-03) | 1993 Reproductive Health Survey                      |   |   | x | x |
| Democratic Republic of the Congo |          |                                                      |   |   |   |   |
|                                  | (COD-01) | 1984 Census                                          |   |   |   | x |
|                                  | (COD-02) | 1995 Multiple Indicator Cluster Survey               |   |   |   | x |
|                                  | (COD-03) | 2001 Multiple Indicator Cluster Survey               |   |   |   | x |
|                                  | (COD-04) | 2007 Standard Demographic and Health Survey          |   |   | x | x |
|                                  | (COD-05) | 2010 Multiple Indicator Cluster Survey               |   |   |   | x |
| Denmark                          |          |                                                      |   |   |   |   |
|                                  | (DNK-01) | 1950-11 Vital Registration                           | x |   |   |   |
| Djibouti                         |          |                                                      |   |   |   |   |
|                                  | (DJI-01) | 2002 Pan Arab Project for Family Health              |   |   | x | x |
|                                  | (DJI-02) | 2006 Multiple Indicator Cluster Survey               |   |   |   | x |
| Dominica                         |          |                                                      |   |   |   |   |
|                                  | (DMA-01) | 1950-63, 1966-10 Vital Registration                  | x |   |   |   |
| Dominican Republic               |          |                                                      |   |   |   |   |
|                                  | (DOM-01) | 1950-92, 1994-01, 2003-11 Vital Registration         | x |   |   |   |
|                                  | (DOM-02) | 1970 Census                                          |   |   |   | x |
|                                  | (DOM-03) | 1975 World Fertility Survey                          |   |   |   | x |
|                                  | (DOM-04) | 1980 World Fertility Survey                          |   |   |   | x |
|                                  | (DOM-05) | 1981 Census                                          |   | x |   |   |
|                                  | (DOM-06) | 1983 Contraceptive Prevalence Survey                 |   |   |   | x |
|                                  | (DOM-07) | 1986 Standard Demographic and Health Survey          |   |   | x | x |
|                                  | (DOM-08) | 1991 Standard Demographic and Health Survey          |   |   | x | x |
|                                  | (DOM-09) | 1996 Standard Demographic and Health Survey          |   |   | x | x |
|                                  | (DOM-10) | 2000 Multiple Indicator Cluster Survey               |   |   |   | x |
|                                  | (DOM-11) | 2002 Standard Demographic and Health Survey          |   |   | x | x |
|                                  | (DOM-12) | 2006 National Multipurpose Household Survey          |   |   | x |   |
|                                  | (DOM-13) | 2007 Standard Demographic and Health Survey          |   |   | x | x |
|                                  | (DOM-14) | 2013 Standard Demographic and Health Survey (Report) |   |   | x |   |
| Ecuador                          |          |                                                      |   |   |   |   |
|                                  | (ECU-01) | 1954-10 Vital Registration                           | x |   |   |   |
|                                  | (ECU-02) | 1974 Census                                          |   |   |   | x |
|                                  | (ECU-03) | 1979-80 World Fertility Survey                       |   |   |   | x |
|                                  | (ECU-04) | 1982 Census                                          |   |   |   | x |
|                                  | (ECU-05) | 1987 Standard Demographic and Health Survey          |   |   | x | x |
|                                  | (ECU-06) | 1989 Reproductive Health Survey                      |   |   | x | x |
|                                  | (ECU-07) | 1990 Census                                          |   |   |   | x |
|                                  | (ECU-08) | 1994 Reproductive Health Survey                      |   |   | x | x |
|                                  | (ECU-09) | 1995 Living Standards Measurement Study              |   |   |   | x |
|                                  | (ECU-10) | 1998 Living Standards Measurement Study              |   |   |   | x |

|                   |          |                                                           |   |   |   |   |
|-------------------|----------|-----------------------------------------------------------|---|---|---|---|
|                   | (ECU-11) | 1999 Reproductive Health Survey                           |   |   | x | x |
|                   | (ECU-12) | 2001 Census                                               |   |   |   | x |
|                   | (ECU-13) | 2004 Reproductive Health Survey                           |   |   | x | x |
|                   | (ECU-14) | 2010 Census                                               |   |   |   | x |
| Egypt             |          |                                                           |   |   |   |   |
|                   | (EGY-01) | 1950-81, 1983-11 Vital Registration                       | x |   |   |   |
|                   | (EGY-02) | 1976 Census                                               |   |   |   | x |
|                   | (EGY-03) | 1980 World Fertility Survey                               |   |   | x | x |
|                   | (EGY-04) | 1984 Contraceptive Prevalence Survey                      |   |   |   | x |
|                   | (EGY-05) | 1986 Census                                               |   |   |   | x |
|                   | (EGY-06) | 1988-89 Standard Demographic and Health Survey            |   |   | x | x |
|                   | (EGY-07) | 1991 Pan Arab Project for Child Development               |   |   | x | x |
|                   | (EGY-08) | 1992-93 Standard Demographic and Health Survey            |   |   | x | x |
|                   | (EGY-09) | 1995-96 Standard Demographic and Health Survey            |   |   | x | x |
|                   | (EGY-10) | 1997-1998 Standard Demographic and Health Survey (Report) |   |   | x |   |
|                   | (EGY-11) | 1998 Standard Demographic and Health Survey (Report)      |   |   | x |   |
|                   | (EGY-12) | 2000 Standard Demographic and Health Survey               |   |   | x | x |
|                   | (EGY-13) | 2003 Interim Demographic and Health Survey                |   |   | x | x |
|                   | (EGY-14) | 2005 Standard Demographic and Health Survey               |   |   | x | x |
|                   | (EGY-15) | 2008 Standard Demographic and Health Survey               |   |   | x | x |
| El Salvador       |          |                                                           |   |   |   |   |
|                   | (SLV-01) | 1950-09, 2011 Vital Registration                          | x |   |   |   |
|                   | (SLV-02) | 1971 Census                                               |   |   |   | x |
|                   | (SLV-03) | 1985 Standard Demographic and Health Survey               |   |   | x | x |
|                   | (SLV-04) | 1988 Reproductive Health Survey                           |   |   |   | x |
|                   | (SLV-05) | 1992 Census                                               |   |   |   | x |
|                   | (SLV-06) | 1992 Household Survey                                     |   |   |   | x |
|                   | (SLV-07) | 1993 Household Survey                                     |   |   |   | x |
|                   | (SLV-08) | 1993 Reproductive Health Survey                           |   |   | x | x |
|                   | (SLV-09) | 1998 Reproductive Health Survey                           |   |   | x | x |
|                   | (SLV-10) | 2002-03 Reproductive Health Survey                        |   |   | x | x |
|                   | (SLV-11) | 2007 Census                                               |   | x |   | x |
|                   | (SLV-12) | 2008 Reproductive Health Survey                           |   |   | x | x |
| Equatorial Guinea |          |                                                           |   |   |   |   |
|                   | (GNQ-01) | 2000 Multiple Indicator Cluster Survey                    |   |   |   | x |
|                   | (GNQ-02) | 2011 Standard Demographic and Health Survey (Report)      |   |   | x |   |
| Eritrea           |          |                                                           |   |   |   |   |
|                   | (ERI-01) | 1995-96 Standard Demographic and Health Survey            |   |   | x | x |
|                   | (ERI-02) | 2002 Standard Demographic and Health Survey               |   |   | x | x |
| Estonia           |          |                                                           |   |   |   |   |
|                   | (EST-01) | 1959-12 Vital Registration                                | x |   |   |   |
|                   | (EST-02) | 1989 Census                                               |   |   |   | x |
| Ethiopia          |          |                                                           |   |   |   |   |
|                   | (ETH-01) | 1984 Census                                               |   |   |   | x |

|                                |          |                                                |   |   |   |   |
|--------------------------------|----------|------------------------------------------------|---|---|---|---|
|                                | (ETH-02) | 1990 National Family and Fertility Survey      |   |   | x | x |
|                                | (ETH-03) | 1994 Census                                    |   |   |   | x |
|                                | (ETH-04) | 2000 Standard Demographic and Health Survey    |   |   | x | x |
|                                | (ETH-05) | 2005 Standard Demographic and Health Survey    |   |   | x | x |
|                                | (ETH-06) | 2007 Census                                    |   | x |   | x |
|                                | (ETH-07) | 2010-11 Standard Demographic and Health Survey |   |   | x | x |
| Federated States of Micronesia |          |                                                |   |   |   |   |
|                                | (FSM-01) | 1973 Census                                    |   |   |   | x |
|                                | (FSM-02) | 1994 Census                                    |   |   |   | x |
|                                | (FSM-03) | 2000 Census                                    |   |   |   | x |
|                                | (FSM-04) | 2003 Vital Registration                        | x |   |   |   |
| Fiji                           |          |                                                |   |   |   |   |
|                                | (FJI-01) | 1950-87, 2009, 2011 Vital Registration         | x |   |   |   |
|                                | (FJI-02) | 1956 Census                                    |   |   |   | x |
|                                | (FJI-03) | 1966 Census                                    |   |   |   | x |
|                                | (FJI-04) | 1974 World Fertility Survey                    |   |   | x | x |
|                                | (FJI-05) | 1976 Census                                    |   |   |   | x |
|                                | (FJI-06) | 1986 Census                                    |   |   |   | x |
|                                | (FJI-07) | 2007 Census                                    |   |   |   | x |
| Finland                        |          |                                                |   |   |   |   |
|                                | (FIN-01) | 1950-11 Vital Registration                     | x |   |   |   |
| France                         |          |                                                |   |   |   |   |
|                                | (FRA-01) | 1950-11 Vital Registration                     | x |   |   |   |
| Gabon                          |          |                                                |   |   |   |   |
|                                | (GAB-01) | 2000-01 Standard Demographic and Health Survey |   |   | x | x |
|                                | (GAB-02) | 2012 Standard Demographic and Health Survey    |   |   | x | x |
| Georgia                        |          |                                                |   |   |   |   |
|                                | (GEO-01) | 1981-83, 1985-10, 2012 Vital Registration      | x |   |   |   |
|                                | (GEO-02) | 1999-00 Reproductive Health Survey             |   |   | x | x |
|                                | (GEO-03) | 2005 Multiple Indicator Cluster Survey         |   |   |   | x |
|                                | (GEO-04) | 2005 Reproductive Health Survey                |   |   | x | x |
|                                | (GEO-05) | 2010 Reproductive Health Survey (Report)       |   |   | x |   |
| Germany                        |          |                                                |   |   |   |   |
|                                | (DEU-01) | 1956-12 Vital Registration                     | x |   |   |   |
| Ghana                          |          |                                                |   |   |   |   |
|                                | (GHA-01) | 1970 Census                                    |   |   |   | x |
|                                | (GHA-02) | 1979-80 World Fertility Survey                 |   |   | x | x |
|                                | (GHA-03) | 1988 Standard Demographic and Health Survey    |   |   | x | x |
|                                | (GHA-04) | 1993-94 Standard Demographic and Health Survey |   |   | x | x |
|                                | (GHA-05) | 1998-99 Living Standards Measurement Study     |   |   |   | x |
|                                | (GHA-06) | 1998-99 Standard Demographic and Health Survey |   |   | x | x |
|                                | (GHA-07) | 2000 Census                                    |   |   |   | x |
|                                | (GHA-08) | 2003 Standard Demographic and Health Survey    |   |   | x | x |
|                                | (GHA-09) | 2005 Living Standards Measurement Study        |   |   |   | x |

|               |          |                                                                               |   |   |   |   |
|---------------|----------|-------------------------------------------------------------------------------|---|---|---|---|
|               | (GHA-10) | 2006 Multiple Indicator Cluster Survey                                        |   |   |   | x |
|               | (GHA-11) | 2007-08 Special Demographic and Health Survey                                 |   |   | x | x |
|               | (GHA-12) | 2008 Standard Demographic and Health Survey                                   |   |   | x | x |
|               | (GHA-13) | 2011 Multiple Indicator Cluster Survey                                        |   |   | x | x |
| Greece        |          |                                                                               |   |   |   |   |
|               | (GRC-01) | 1951-11 Vital Registration                                                    | x |   |   |   |
|               | (GRC-02) | 1991 Census                                                                   |   |   |   | x |
| Grenada       |          |                                                                               |   |   |   |   |
|               | (GRD-01) | 1950-69, 1974-78, 1984-85, 1988-10 Vital Registration                         | x |   |   |   |
| Guatemala     |          |                                                                               |   |   |   |   |
|               | (GTM-01) | 1950-72, 1974-81, 1983-09, 2011 Vital Registration                            | x |   |   |   |
|               | (GTM-02) | 1978-79 Reproductive Health Survey                                            |   |   |   | x |
|               | (GTM-03) | 1981 Census                                                                   |   |   |   | x |
|               | (GTM-04) | 1987 Standard Demographic and Health Survey                                   |   |   | x | x |
|               | (GTM-05) | 1995 Standard Demographic and Health Survey                                   |   |   | x | x |
|               | (GTM-06) | 1998-99 Interim Demographic and Health Survey                                 |   |   | x | x |
|               | (GTM-07) | 2000 Living Standards Measurement Study                                       |   |   |   | x |
|               | (GTM-08) | 2002 Reproductive Health Survey                                               |   |   | x | x |
|               | (GTM-09) | 2008-09 Reproductive Health Survey                                            |   |   | x | x |
| Guinea        |          |                                                                               |   |   |   |   |
|               | (GIN-01) | 1983 Census                                                                   |   | x |   |   |
|               | (GIN-02) | 1992 Standard Demographic and Health Survey (Report)                          |   |   | x |   |
|               | (GIN-03) | 1996 Census                                                                   |   |   |   | x |
|               | (GIN-04) | 1999 Standard Demographic and Health Survey                                   |   |   | x | x |
|               | (GIN-05) | 2005 Standard Demographic and Health Survey                                   |   |   | x | x |
|               | (GIN-06) | 2012 Standard Demographic and Health Survey                                   |   |   | x | x |
| Guinea-Bissau |          |                                                                               |   |   |   |   |
|               | (GNB-01) | 2000 Multiple Indicator Cluster Survey                                        |   |   |   | x |
|               | (GNB-02) | 2006 Multiple Indicator Cluster Survey                                        |   |   |   | x |
|               | (GNB-03) | 2010 Multiple Indicator Cluster Survey                                        |   |   |   | x |
| Guyana        |          |                                                                               |   |   |   |   |
|               | (GUY-01) | 1950-61, 1969-71, 1974, 1977, 1979, 1984, 1988-99, 2001-09 Vital Registration | x |   |   |   |
|               | (GUY-02) | 1975 World Fertility Survey                                                   |   |   | x | x |
|               | (GUY-03) | 1993 Living Standards Measurement Study                                       |   |   |   | x |
|               | (GUY-04) | 2000 Multiple Indicator Cluster Survey                                        |   |   |   | x |
|               | (GUY-05) | 2005 AIDS Indicator Survey                                                    |   |   | x | x |
|               | (GUY-06) | 2006-07 Multiple Indicator Cluster Survey                                     |   |   |   | x |
|               | (GUY-07) | 2009 Standard Demographic and Health Survey                                   |   |   | x | x |
| Haiti         |          |                                                                               |   |   |   |   |
|               | (HTI-01) | 1971-73 Multi-Round Demographic Survey                                        |   |   | x |   |
|               | (HTI-02) | 1971 Census                                                                   |   |   | x |   |
|               | (HTI-03) | 1972 Sample Survey                                                            |   | x |   |   |
|               | (HTI-04) | 1977 World Fertility Survey                                                   |   |   | x | x |
|               | (HTI-05) | 1980, 1997, 1999, 2001-04 Vital Registration                                  | x |   |   |   |
|               | (HTI-06) | 1987 Mortality, Morbidity and Utilization of Services Survey                  |   |   | x | x |

|           |          |                                                                     |   |   |   |   |
|-----------|----------|---------------------------------------------------------------------|---|---|---|---|
|           | (HTI-07) | 1994-95 Standard Demographic and Health Survey                      |   |   | x | x |
|           | (HTI-08) | 2000 Standard Demographic and Health Survey                         |   |   | x | x |
|           | (HTI-09) | 2005-06 Standard Demographic and Health Survey                      |   |   | x | x |
|           | (HTI-10) | 2008 Global Fund Facility Survey                                    |   |   | x |   |
|           | (HTI-11) | 2012 Standard Demographic and Health Survey                         |   |   | x | x |
| Honduras  |          |                                                                     |   |   |   |   |
|           | (HND-01) | 1950-83, 1987-90 Vital Registration                                 | x |   |   |   |
|           | (HND-02) | 1970-72 National Demographic Survey                                 |   |   | x | x |
|           | (HND-03) | 1974 Census                                                         |   |   |   | x |
|           | (HND-04) | 1983-84 National Demographic Survey                                 |   |   |   | x |
|           | (HND-05) | 1985 National Maternal and Infant Health Survey                     |   |   |   | x |
|           | (HND-06) | 1987 Reproductive Health Survey                                     |   |   |   | x |
|           | (HND-07) | 1988 Census                                                         |   |   |   | x |
|           | (HND-08) | 1991-92 Reproductive Health Survey                                  |   |   | x | x |
|           | (HND-09) | 1996 Reproductive Health Survey                                     |   |   | x | x |
|           | (HND-10) | 2001 Census                                                         |   | x |   |   |
|           | (HND-11) | 2001 Reproductive Health Survey                                     |   |   | x | x |
|           | (HND-12) | 2004 Survey of Living Conditions                                    |   |   |   | x |
|           | (HND-13) | 2005-06 Standard Demographic and Health Survey                      |   |   | x | x |
|           | (HND-14) | 2011-12 Standard Demographic and Health Survey                      |   |   | x | x |
| Hungary   |          |                                                                     |   |   |   |   |
|           | (HUN-01) | 1950-12 Vital Registration                                          | x |   |   |   |
|           | (HUN-02) | 1960 Census                                                         |   |   |   | x |
| Iceland   |          |                                                                     |   |   |   |   |
|           | (ISL-01) | 1950-11 Vital Registration                                          | x |   |   |   |
| India     |          |                                                                     |   |   |   |   |
|           | (IND-01) | 1950-64 Vital Registration                                          | x |   |   |   |
|           | (IND-02) | 1970-80, 1983-84, 1986, 1988-89, 1992-09 Sample Registration System | x |   |   |   |
|           | (IND-03) | 1970 All-India Family Planning Survey                               |   |   |   | x |
|           | (IND-04) | 1981 Census                                                         |   |   |   | x |
|           | (IND-05) | 1991 Census                                                         |   |   |   | x |
|           | (IND-06) | 1992-93 Standard Demographic and Health Survey                      |   |   | x | x |
|           | (IND-07) | 1998-00 Standard Demographic and Health Survey                      |   |   | x | x |
|           | (IND-08) | 1998-99 District Level Household and Facility Survey 1              |   |   |   | x |
|           | (IND-09) | 2001 Census                                                         |   |   |   | x |
|           | (IND-10) | 2002-04 District Level Household and Facility Survey 2              |   |   |   | x |
|           | (IND-11) | 2004-05 Human Development Survey                                    |   |   | x | x |
|           | (IND-12) | 2005-06 Standard Demographic and Health Survey                      |   |   | x | x |
|           | (IND-13) | 2007-08 District Level Household and Facility Survey 3              |   |   |   | x |
|           | (IND-14) | 2010-12 Sample Registration System (Report)                         | x |   |   |   |
| Indonesia |          |                                                                     |   |   |   |   |
|           | (IDN-01) | 1964-65 Socioeconomic National Sample Survey                        |   | x |   | x |
|           | (IDN-02) | 1971 Census                                                         |   |   |   | x |
|           | (IDN-03) | 1976 Intercensal Population Survey                                  |   |   |   | x |
|           | (IDN-04) | 1976 World Fertility Survey                                         |   |   | x | x |

|      |          |                                                    |   |   |   |   |
|------|----------|----------------------------------------------------|---|---|---|---|
|      | (IDN-05) | 1980 Census                                        |   |   |   | X |
|      | (IDN-06) | 1985 Intercensal Population Survey                 |   | X |   | X |
|      | (IDN-07) | 1987 Standard Demographic and Health Survey        |   |   | X | X |
|      | (IDN-08) | 1990 Census                                        |   |   |   | X |
|      | (IDN-09) | 1991 Standard Demographic and Health Survey        |   |   | X | X |
|      | (IDN-10) | 1992 National Socioeconomic Survey                 |   |   |   | X |
|      | (IDN-11) | 1993 Indonesia Family Life Survey                  |   |   | X | X |
|      | (IDN-12) | 1993 National Socioeconomic Survey                 |   |   |   | X |
|      | (IDN-13) | 1994 National Socioeconomic Survey                 |   |   |   | X |
|      | (IDN-14) | 1994 Standard Demographic and Health Survey        |   |   | X | X |
|      | (IDN-15) | 1995 Intercensal Population Survey                 |   |   | X | X |
|      | (IDN-16) | 1995 National Socioeconomic Survey                 |   |   |   | X |
|      | (IDN-17) | 1996 National Socioeconomic Survey                 |   | X |   | X |
|      | (IDN-18) | 1997 Indonesia Family Life Survey                  |   |   | X | X |
|      | (IDN-19) | 1997 National Socioeconomic Survey                 |   |   |   | X |
|      | (IDN-20) | 1997 Standard Demographic and Health Survey        |   |   | X | X |
|      | (IDN-21) | 1998 National Socioeconomic Survey                 |   | X |   | X |
|      | (IDN-22) | 1999 Census                                        |   | X |   |   |
|      | (IDN-23) | 1999 National Socioeconomic Survey                 |   | X |   | X |
|      | (IDN-24) | 2000 Census                                        |   |   | X | X |
|      | (IDN-25) | 2000 Indonesia Family Life Survey                  |   |   | X | X |
|      | (IDN-26) | 2000 National Socioeconomic Survey                 |   |   |   | X |
|      | (IDN-27) | 2001 National Socioeconomic Survey                 |   |   |   | X |
|      | (IDN-28) | 2002-03 Standard Demographic and Health Survey     |   |   | X | X |
|      | (IDN-29) | 2002 National Socioeconomic Survey                 |   |   |   | X |
|      | (IDN-30) | 2003 National Socioeconomic Survey                 |   | X |   | X |
|      | (IDN-31) | 2004 National Socioeconomic Survey                 |   |   |   | X |
|      | (IDN-32) | 2005 Intercensal Population Survey                 |   |   | X |   |
|      | (IDN-33) | 2005 National Socioeconomic Survey                 |   |   |   | X |
|      | (IDN-34) | 2006 National Socioeconomic Survey                 |   | X |   | X |
|      | (IDN-35) | 2007 Indonesia Family Life Survey                  |   |   | X |   |
|      | (IDN-36) | 2007 National Socioeconomic Survey                 |   |   |   | X |
|      | (IDN-37) | 2007 Standard Demographic and Health Survey        |   |   | X | X |
|      | (IDN-38) | 2008 Indonesia Family Life Survey                  |   |   |   | X |
|      | (IDN-39) | 2008 National Socioeconomic Survey                 |   |   |   | X |
|      | (IDN-40) | 2009 National Socioeconomic Survey                 |   |   |   | X |
|      | (IDN-41) | 2010 Census                                        |   |   |   | X |
|      | (IDN-42) | 2010 National Socioeconomic Survey                 |   |   |   | X |
|      | (IDN-43) | 2011 National Socioeconomic Survey                 |   |   |   | X |
|      | (IDN-44) | 2012 Standard Demographic and Health Survey        |   |   | X | X |
| Iran | (IRN-01) | 1973-76 Baseline Population Growth Survey          |   |   | X | X |
|      | (IRN-02) | 1974-75, 1978-87, 1991, 1996-10 Vital Registration | X |   |   |   |
|      | (IRN-03) | 1974 Sample Survey on Population and Health        |   |   | X |   |
|      | (IRN-04) | 1984 Mortality and Fertility Survey                |   |   | X |   |



|         |          |                                                                                     |   |   |   |   |
|---------|----------|-------------------------------------------------------------------------------------|---|---|---|---|
|         | (IRN-05) | 1986 Census                                                                         |   |   |   | X |
|         | (IRN-06) | 1991-94 Intercensal Population Survey                                               |   |   |   | X |
|         | (IRN-07) | 1994 Mortality and Fertility Survey                                                 |   |   | X |   |
|         | (IRN-08) | 1996 Census                                                                         |   |   |   | X |
|         | (IRN-09) | 1998 Measuring Population Growth Survey                                             |   |   |   | X |
|         | (IRN-10) | 2000 Iran Demographic and Health Survey                                             |   |   | X | X |
|         | (IRN-11) | 2006 Census                                                                         |   |   |   | X |
|         | (IRN-12) | 2010 Standard Demographic and Health Survey                                         |   |   | X |   |
| Iraq    |          |                                                                                     |   |   |   |   |
|         | (IRQ-01) | 1955, 1958-69, 1976-77, 1987-89, 2008 Vital Registration                            | X |   |   |   |
|         | (IRQ-02) | 1973-75 Demographic Sample Survey and Sample Registration System                    | X |   |   |   |
|         | (IRQ-03) | 1974 Fertility Survey                                                               |   |   |   | X |
|         | (IRQ-04) | 1987 Census                                                                         |   |   |   | X |
|         | (IRQ-05) | 1989 Child Health Survey                                                            |   |   | X | X |
|         | (IRQ-06) | 1990 Iraq Immunization, Diarrhoeal Disease, Maternal and Childhood Mortality Survey |   |   |   | X |
|         | (IRQ-07) | 1991 Epidemiological Study of Child Mortality in Post-War Iraq                      |   |   | X |   |
|         | (IRQ-08) | 1997 Census                                                                         |   |   |   | X |
|         | (IRQ-09) | 1999 Iraq Child and Maternal Mortality Survey                                       |   |   | X |   |
|         | (IRQ-10) | 2004 Multiple Indicator Rapid Assessment                                            |   | X | X | X |
|         | (IRQ-11) | 2006-07 Iraq Family Health Survey                                                   |   |   | X | X |
|         | (IRQ-12) | 2006 Multiple Indicator Cluster Survey                                              |   |   | X | X |
|         | (IRQ-13) | 2011 Multiple Indicator Cluster Survey                                              |   |   | X | X |
| Ireland |          |                                                                                     |   |   |   |   |
|         | (IRL-01) | 1950-10 Vital Registration                                                          | X |   |   |   |
|         | (IRL-02) | 2011 Census                                                                         |   | X |   |   |
| Israel  |          |                                                                                     |   |   |   |   |
|         | (ISR-01) | 1950-12 Vital Registration                                                          | X |   |   |   |
| Italy   |          |                                                                                     |   |   |   |   |
|         | (ITA-01) | 1950-10 Vital Registration                                                          | X |   |   |   |
| Jamaica |          |                                                                                     |   |   |   |   |
|         | (JAM-01) | 1950-65, 1967, 1970-71, 1975, 1977, 1980-91, 1999-06 Vital Registration             | X |   |   |   |
|         | (JAM-02) | 1975-76 World Fertility Survey                                                      |   |   | X | X |
|         | (JAM-03) | 1982 Census                                                                         |   |   |   | X |
|         | (JAM-04) | 1999 Multiple Indicator Cluster Survey                                              |   |   |   | X |
|         | (JAM-05) | 2001 Census                                                                         |   |   |   | X |
|         | (JAM-06) | 2005 Multiple Indicator Cluster Survey                                              |   |   |   | X |
|         | (JAM-07) | 2008-09 Reproductive Health Survey                                                  |   |   | X |   |
| Japan   |          |                                                                                     |   |   |   |   |
|         | (JPN-01) | 1950-11 Vital Registration                                                          | X |   |   |   |
| Jordan  |          |                                                                                     |   |   |   |   |
|         | (JOR-01) | 1953-57, 1959-80, 2004-06, 2008 Vital Registration                                  | X |   |   |   |
|         | (JOR-02) | 1972 National Fertility Survey                                                      |   |   |   | X |
|         | (JOR-03) | 1976 World Fertility Survey                                                         |   |   |   | X |
|         | (JOR-04) | 1979 Census                                                                         |   |   |   | X |
|         | (JOR-05) | 1981 Demographic Survey                                                             |   |   |   | X |

|            |          |                                                         |   |   |   |   |
|------------|----------|---------------------------------------------------------|---|---|---|---|
|            | (JOR-06) | 1983 Reproductive Health Survey (Report)                |   |   | x |   |
|            | (JOR-07) | 1988 Child Mortality Survey                             |   |   |   | x |
|            | (JOR-08) | 1990 Child Mortality Survey                             |   |   |   | x |
|            | (JOR-09) | 1990 Standard Demographic and Health Survey             |   |   | x | x |
|            | (JOR-10) | 1994 Population and Housing Census Accompanying Survey  |   |   | x |   |
|            | (JOR-11) | 1995-96 Assessment of Causes of Death by Verbal Autopsy |   |   | x |   |
|            | (JOR-12) | 1997 Standard Demographic and Health Survey             |   |   | x | x |
|            | (JOR-13) | 1999 Annual Fertility Survey                            |   |   |   | x |
|            | (JOR-14) | 2002 Standard Demographic and Health Survey             |   |   | x | x |
|            | (JOR-15) | 2007 Standard Demographic and Health Survey             |   |   | x | x |
|            | (JOR-16) | 2009 Interim Demographic and Health Survey              |   |   | x | x |
|            | (JOR-17) | 2012 Standard Demographic and Health Survey             |   |   | x | x |
| Kazakhstan |          |                                                         |   |   |   |   |
|            | (KAZ-01) | 1981-82, 1985-10 Vital Registration                     | x |   |   |   |
|            | (KAZ-02) | 1989 Census                                             |   |   |   | x |
|            | (KAZ-03) | 1995 Standard Demographic and Health Survey             |   |   | x | x |
|            | (KAZ-04) | 1996 Living Standards Measurement Study                 |   |   |   | x |
|            | (KAZ-05) | 1999 Census                                             |   |   |   | x |
|            | (KAZ-06) | 1999 Standard Demographic and Health Survey             |   |   | x | x |
|            | (KAZ-07) | 2006 Multiple Indicator Cluster Survey                  |   |   |   | x |
|            | (KAZ-08) | 2009 Census                                             |   |   |   | x |
|            | (KAZ-09) | 2010 Multiple Indicator Cluster Survey                  |   |   |   | x |
| Kenya      |          |                                                         |   |   |   |   |
|            | (KEN-01) | 1969 Census                                             |   |   |   | x |
|            | (KEN-02) | 1977-78 World Fertility Survey                          |   |   | x | x |
|            | (KEN-03) | 1977 National Demographic Survey                        |   |   |   | x |
|            | (KEN-04) | 1979 Census                                             |   |   |   | x |
|            | (KEN-05) | 1988-89 Standard Demographic and Health Survey          |   |   | x | x |
|            | (KEN-06) | 1989 Census                                             |   |   |   | x |
|            | (KEN-07) | 1993 Standard Demographic and Health Survey             |   |   | x | x |
|            | (KEN-08) | 1998 Standard Demographic and Health Survey             |   |   | x | x |
|            | (KEN-09) | 1999 Census                                             |   |   |   | x |
|            | (KEN-10) | 2000 Multiple Indicator Cluster Survey                  |   |   |   | x |
|            | (KEN-11) | 2003 Standard Demographic and Health Survey             |   |   | x | x |
|            | (KEN-12) | 2008-09 Standard Demographic and Health Survey          |   |   | x | x |
|            | (KEN-13) | 2009 Census                                             |   | x |   | x |
| Kiribati   |          |                                                         |   |   |   |   |
|            | (KIR-01) | 1963 Census                                             |   |   |   | x |
|            | (KIR-02) | 1968 Census                                             |   |   |   | x |
|            | (KIR-03) | 1973 Census                                             |   |   |   | x |
|            | (KIR-04) | 1978 Census                                             |   |   |   | x |
|            | (KIR-05) | 1991-01 Vital Registration                              | x |   |   |   |
|            | (KIR-06) | 2005 Census                                             |   |   |   | x |
|            | (KIR-07) | 2009 Demographic Health Survey                          |   |   | x | x |
| Kuwait     |          |                                                         |   |   |   |   |

|            |          |                                                    |   |   |   |   |
|------------|----------|----------------------------------------------------|---|---|---|---|
|            | (KWT-01) | 1962-89, 1991-11 Vital Registration                | x |   |   |   |
|            | (KWT-02) | 1975 Census                                        |   |   |   | x |
|            | (KWT-03) | 1980 Census                                        |   |   |   | x |
|            | (KWT-04) | 1987 Child Health Survey                           |   |   |   | x |
|            | (KWT-05) | 1996 Gulf Family Health Survey                     |   |   | x |   |
| Kyrgyzstan |          |                                                    |   |   |   |   |
|            | (KGZ-01) | 1981-11 Vital Registration                         | x |   |   |   |
|            | (KGZ-02) | 1993 Living Standards Measurement Study            |   |   |   | x |
|            | (KGZ-03) | 1997 Standard Demographic and Health Survey        |   |   | x | x |
|            | (KGZ-04) | 1999 Census                                        |   |   |   | x |
|            | (KGZ-05) | 2005-06 Multiple Indicator Cluster Survey          |   |   |   | x |
|            | (KGZ-06) | 2009 Census                                        |   |   |   | x |
|            | (KGZ-07) | 2012 Standard Demographic and Health Survey        |   |   | x | x |
| Laos       |          |                                                    |   |   |   |   |
|            | (LAO-01) | 1992-93 Living Conditions Survey                   |   |   |   | x |
|            | (LAO-02) | 1994-95 Fertility and Birth Spacing Survey         |   |   | x |   |
|            | (LAO-03) | 1995 Census                                        |   |   |   | x |
|            | (LAO-04) | 2000 Lao Reproductive Health Survey                |   |   | x |   |
|            | (LAO-05) | 2011 Multiple Indicator Cluster Survey             |   |   | x | x |
| Latvia     |          |                                                    |   |   |   |   |
|            | (LVA-01) | 1959-12 Vital Registration                         | x |   |   |   |
|            | (LVA-02) | 1989 Census                                        |   |   |   | x |
| Lebanon    |          |                                                    |   |   |   |   |
|            | (LBN-01) | 1971 National Fertility and Family Planning Survey |   |   |   | x |
|            | (LBN-02) | 1996 Pan Arab Project for Child Development        |   |   | x | x |
|            | (LBN-03) | 2000 Multiple Indicator Cluster Survey             |   |   |   | x |
|            | (LBN-04) | 2004 Pan Arab Project for Family Health            |   |   | x | x |
| Lesotho    |          |                                                    |   |   |   |   |
|            | (LSO-01) | 1971 Demographic Survey                            |   |   |   | x |
|            | (LSO-02) | 1976 Census                                        |   |   |   | x |
|            | (LSO-03) | 1977 World Fertility Survey                        |   |   | x | x |
|            | (LSO-04) | 1986 Census                                        |   |   |   | x |
|            | (LSO-05) | 1996 Census                                        |   |   |   | x |
|            | (LSO-06) | 2000 Multiple Indicator Cluster Survey             |   |   |   | x |
|            | (LSO-07) | 2001 Demographic Survey                            |   |   |   | x |
|            | (LSO-08) | 2004-05 Standard Demographic and Health Survey     |   |   | x | x |
|            | (LSO-09) | 2006 Census                                        |   | x |   |   |
|            | (LSO-10) | 2009-10 Standard Demographic and Health Survey     |   |   | x | x |
| Liberia    |          |                                                    |   |   |   |   |
|            | (LBR-01) | 1969-71 Population Growth Survey                   |   |   | x | x |
|            | (LBR-02) | 1974 Census                                        |   |   |   | x |
|            | (LBR-03) | 1986 Standard Demographic and Health Survey        |   |   | x | x |
|            | (LBR-04) | 2006-07 Standard Demographic and Health Survey     |   |   | x | x |
|            | (LBR-05) | 2008-09 Malaria Indicator Survey                   |   |   | x | x |
|            | (LBR-06) | 2011 Malaria Indicator Survey                      |   |   |   | x |

|            |          |                                                             |   |   |   |   |
|------------|----------|-------------------------------------------------------------|---|---|---|---|
|            | (LBR-07) | 2013 Standard Demographic and Health Survey (Report)        |   |   | x |   |
| Libya      |          |                                                             |   |   |   |   |
|            | (LBY-01) | 1972-76, 1981, 1996, 2000, 2002, 2006-08 Vital Registration | x |   |   |   |
|            | (LBY-02) | 1973 Census                                                 |   |   |   | x |
|            | (LBY-03) | 1995 Pan Arab Project for Child Development                 |   |   | x | x |
| Lithuania  |          |                                                             |   |   |   |   |
|            | (LTU-01) | 1959-12 Vital Registration                                  | x |   |   |   |
| Luxembourg |          |                                                             |   |   |   |   |
|            | (LUX-01) | 1950-11 Vital Registration                                  | x |   |   |   |
| Macedonia  |          |                                                             |   |   |   |   |
|            | (MKD-01) | 1982, 1989-11 Vital Registration                            | x |   |   |   |
|            | (MKD-02) | 2005 Multiple Indicator Cluster Survey                      |   |   |   | x |
|            | (MKD-03) | 2011 Multiple Indicator Cluster Survey (Report)             |   |   |   | x |
| Madagascar |          |                                                             |   |   |   |   |
|            | (MDG-01) | 1955, 1957-61, 1964-68, 1970-72 Vital Registration          | x |   |   |   |
|            | (MDG-02) | 1966 Demographic Survey                                     |   |   |   | x |
|            | (MDG-03) | 1992 Standard Demographic and Health Survey                 |   |   | x | x |
|            | (MDG-04) | 1993 Census                                                 |   | x |   |   |
|            | (MDG-05) | 1997 Standard Demographic and Health Survey                 |   |   | x | x |
|            | (MDG-06) | 2000 Multiple Indicator Cluster Survey                      |   |   |   | x |
|            | (MDG-07) | 2003-04 Standard Demographic and Health Survey              |   |   | x | x |
|            | (MDG-08) | 2008-09 Standard Demographic and Health Survey              |   |   | x | x |
|            | (MDG-09) | 2011 Malaria Indicator Survey                               |   |   |   | x |
|            | (MDG-10) | 2013 Malaria Indicator Survey                               |   |   |   | x |
| Malawi     |          |                                                             |   |   |   |   |
|            | (MWI-01) | 1970-72 Population Change Survey                            |   | x | x | x |
|            | (MWI-02) | 1977 Census                                                 |   | x |   | x |
|            | (MWI-03) | 1982 Demographic Survey                                     |   |   |   | x |
|            | (MWI-04) | 1987 Census                                                 |   | x |   | x |
|            | (MWI-05) | 1992 Standard Demographic and Health Survey                 |   |   | x | x |
|            | (MWI-06) | 1995 Multiple Indicator Cluster Survey (Report)             |   |   |   | x |
|            | (MWI-07) | 1998 Census                                                 |   | x |   | x |
|            | (MWI-08) | 2000 Standard Demographic and Health Survey                 |   |   | x | x |
|            | (MWI-09) | 2004-05 Standard Demographic and Health Survey              |   |   | x | x |
|            | (MWI-10) | 2006 Multiple Indicator Cluster Survey                      |   |   |   | x |
|            | (MWI-11) | 2008 Census                                                 |   | x |   | x |
|            | (MWI-12) | 2008 Global Fund Facility Survey                            |   |   | x |   |
|            | (MWI-13) | 2010 Standard Demographic and Health Survey                 |   |   | x | x |
|            | (MWI-14) | 2012 Malaria Indicator Survey                               |   |   |   | x |
| Malaysia   |          |                                                             |   |   |   |   |
|            | (MYS-01) | 1952-72, 1976-78, 1984-86, 1990-09 Vital Registration       | x |   |   |   |
|            | (MYS-02) | 1970 Census                                                 |   |   |   | x |
|            | (MYS-03) | 1974 World Fertility Survey                                 |   |   | x | x |
|            | (MYS-04) | 1980 Census                                                 |   |   |   | x |
| Maldives   |          |                                                             |   |   |   |   |

|                         |          |                                                         |   |   |   |   |
|-------------------------|----------|---------------------------------------------------------|---|---|---|---|
|                         | (MDV-01) | 1974-76, 1978-11 Vital Registration                     | x |   |   |   |
|                         | (MDV-02) | 1977 Census                                             |   |   |   | x |
|                         | (MDV-03) | 1985 Census                                             |   |   |   | x |
|                         | (MDV-04) | 1990 Census                                             |   |   |   | x |
|                         | (MDV-05) | 1995 Census                                             |   |   |   | x |
|                         | (MDV-06) | 2000 Census                                             |   |   |   | x |
|                         | (MDV-07) | 2009 Standard Demographic and Health Survey             |   |   | x | x |
| <b>Mali</b>             |          |                                                         |   |   |   |   |
|                         | (MLI-01) | 1976 Census                                             |   | x |   |   |
|                         | (MLI-02) | 1987 Census                                             |   | x |   | x |
|                         | (MLI-03) | 1987 Standard Demographic and Health Survey             |   |   | x | x |
|                         | (MLI-04) | 1995-96 Standard Demographic and Health Survey          |   |   | x | x |
|                         | (MLI-05) | 1998 Census                                             |   | x |   | x |
|                         | (MLI-06) | 2001 Standard Demographic and Health Survey             |   |   | x | x |
|                         | (MLI-07) | 2006 Standard Demographic and Health Survey             |   |   | x | x |
|                         | (MLI-08) | 2012 Standard Demographic and Health Survey (Report)    |   |   | x |   |
| <b>Malta</b>            |          |                                                         |   |   |   |   |
|                         | (MLT-01) | 1950-11 Vital Registration                              | x |   |   |   |
| <b>Marshall Islands</b> |          |                                                         |   |   |   |   |
|                         | (MHL-01) | 1986-97, 2005-06 Vital Registration                     | x |   |   |   |
|                         | (MHL-02) | 1999 Census                                             |   |   |   | x |
|                         | (MHL-03) | 2006-07 Standard Demographic and Health Survey (Report) |   |   | x |   |
| <b>Mauritania</b>       |          |                                                         |   |   |   |   |
|                         | (MRT-01) | 1981 World Fertility Survey                             |   |   | x | x |
|                         | (MRT-02) | 1988 Census                                             |   |   | x |   |
|                         | (MRT-03) | 1990-91 Pan Arab Project for Child Development          |   |   | x | x |
|                         | (MRT-04) | 2000-01 Standard Demographic and Health Survey          |   |   | x | x |
|                         | (MRT-05) | 2003-04 Special Demographic and Health Survey           |   |   | x | x |
|                         | (MRT-06) | 2007 Multiple Indicator Cluster Survey                  |   |   |   | x |
| <b>Mauritius</b>        |          |                                                         |   |   |   |   |
|                         | (MUS-01) | 1950-11 Vital Registration                              | x |   |   |   |
| <b>Mexico</b>           |          |                                                         |   |   |   |   |
|                         | (MEX-01) | 1950-12 Vital Registration                              | x |   |   |   |
|                         | (MEX-02) | 1976-77 World Fertility Survey                          |   |   | x | x |
|                         | (MEX-03) | 1979 National Planning Survey on Contraceptive Use      |   |   |   | x |
|                         | (MEX-04) | 1980 Census                                             |   |   |   | x |
|                         | (MEX-05) | 1987 Standard Demographic and Health Survey             |   |   | x | x |
|                         | (MEX-06) | 1990 Census                                             |   |   |   | x |
|                         | (MEX-07) | 1991 National Survey of Demographic Dynamics            |   |   |   | x |
|                         | (MEX-08) | 1992 National Survey of Demographic Dynamics            |   |   | x | x |
|                         | (MEX-09) | 2000 Census                                             |   |   |   | x |
|                         | (MEX-10) | 2005 Conteo                                             |   |   |   | x |
|                         | (MEX-11) | 2006 National Survey of Demographic Dynamics            |   |   |   | x |
|                         | (MEX-12) | 2009 National Survey of Demographic Dynamics            |   |   |   | x |
|                         | (MEX-13) | 2010 Census                                             |   |   |   | x |

|            |          |                                                                            |   |   |   |   |
|------------|----------|----------------------------------------------------------------------------|---|---|---|---|
|            | (MEX-14) | 2010 Household Income and Expenditure Survey                               |   |   |   | x |
| Moldova    |          |                                                                            |   |   |   |   |
|            | (MDA-01) | 1981-82, 1985-12 Vital Registration                                        | x |   |   |   |
|            | (MDA-02) | 1989 Census                                                                |   |   |   | x |
|            | (MDA-03) | 1997 Reproductive Health Survey                                            |   |   |   | x |
|            | (MDA-04) | 2005 Standard Demographic and Health Survey                                |   |   | x | x |
| Mongolia   |          |                                                                            |   |   |   |   |
|            | (MNG-01) | 1965, 1970, 1975, 1980, 1985, 1987-90, 1994-03 Vital Registration          | x |   |   |   |
|            | (MNG-02) | 1989 Census                                                                |   |   |   | x |
|            | (MNG-03) | 1994 Demographic Survey                                                    |   |   |   | x |
|            | (MNG-04) | 1998 Reproductive Health Survey                                            |   |   | x | x |
|            | (MNG-05) | 2000 Multiple Indicator Cluster Survey                                     |   |   |   | x |
|            | (MNG-06) | 2003 Reproductive Health Survey                                            |   |   | x | x |
|            | (MNG-07) | 2005 Multiple Indicator Cluster Survey                                     |   |   |   | x |
|            | (MNG-08) | 2008 Reproductive Health Survey                                            |   |   |   | x |
|            | (MNG-09) | 2010 Multiple Indicator Cluster Survey                                     |   |   |   | x |
| Montenegro |          |                                                                            |   |   |   |   |
|            | (MNE-01) | 1961 Census                                                                |   | x |   |   |
|            | (MNE-02) | 1971 Census                                                                |   | x |   |   |
|            | (MNE-03) | 1981 Census                                                                |   | x |   |   |
|            | (MNE-04) | 1991 Census                                                                |   | x |   |   |
|            | (MNE-05) | 1995-09, 2011 Vital Registration                                           | x |   |   |   |
| Morocco    |          |                                                                            |   |   |   |   |
|            | (MAR-01) | 1980 World Fertility Survey                                                |   |   | x | x |
|            | (MAR-02) | 1982 Census                                                                |   |   |   | x |
|            | (MAR-03) | 1983 Contraceptive Prevalence Survey                                       |   |   |   | x |
|            | (MAR-04) | 1987 Standard Demographic and Health Survey                                |   |   | x | x |
|            | (MAR-05) | 1989-91, 1993, 1995-97, 1999, 2001, 2005, 2007-08, 2011 Vital Registration | x |   |   |   |
|            | (MAR-06) | 1992 Standard Demographic and Health Survey                                |   |   | x | x |
|            | (MAR-07) | 1994 Census                                                                |   |   |   | x |
|            | (MAR-08) | 1995 Special Demographic and Health Survey                                 |   |   | x | x |
|            | (MAR-09) | 1996-97 Pan Arab Project for Child Development                             |   |   | x | x |
|            | (MAR-10) | 2003-04 Standard Demographic and Health Survey                             |   |   | x | x |
|            | (MAR-11) | 2004 Census                                                                |   |   |   | x |
|            | (MAR-12) | 2009 Multi-Round Demographic Survey                                        |   | x |   |   |
|            | (MAR-13) | 2011 National Survey on Population and Family Health                       |   |   | x |   |
| Mozambique |          |                                                                            |   |   |   |   |
|            | (MOZ-01) | 1970 Census                                                                |   |   |   | x |
|            | (MOZ-02) | 1980 Census                                                                |   |   |   | x |
|            | (MOZ-03) | 1995 Multiple Indicator Cluster Survey (Report)                            |   |   |   | x |
|            | (MOZ-04) | 1997 Census                                                                |   | x |   | x |
|            | (MOZ-05) | 1997 Standard Demographic and Health Survey                                |   |   | x | x |
|            | (MOZ-06) | 2003 Standard Demographic and Health Survey                                |   |   | x | x |
|            | (MOZ-07) | 2007 Census                                                                |   | x |   | x |
|            | (MOZ-08) | 2008 Multiple Indicator Cluster Survey                                     |   |   | x | x |

|             |          |                                                                |   |   |   |   |
|-------------|----------|----------------------------------------------------------------|---|---|---|---|
|             | (MOZ-09) | 2009 AIDS Indicator Survey                                     |   |   |   | x |
|             | (MOZ-10) | 2011 Standard Demographic and Health Survey                    |   |   | x | x |
| Namibia     |          |                                                                |   |   |   |   |
|             | (NAM-01) | 1991 Census                                                    |   |   |   | x |
|             | (NAM-02) | 1992 Standard Demographic and Health Survey                    |   |   | x | x |
|             | (NAM-03) | 2000 Standard Demographic and Health Survey                    |   |   | x | x |
|             | (NAM-04) | 2001 Census                                                    |   | x |   |   |
|             | (NAM-05) | 2006-07 Standard Demographic and Health Survey                 |   |   | x | x |
| Nepal       |          |                                                                |   |   |   |   |
|             | (NPL-01) | 1971 Census                                                    |   |   |   | x |
|             | (NPL-02) | 1976 World Fertility Survey                                    |   |   | x | x |
|             | (NPL-03) | 1981 Census                                                    |   |   |   | x |
|             | (NPL-04) | 1985-86 Fertility and Family Planning Survey                   |   |   |   | x |
|             | (NPL-05) | 1991 Census                                                    |   |   |   | x |
|             | (NPL-06) | 1991 Fertility, Family Planning and Health Survey              |   |   | x | x |
|             | (NPL-07) | 1996 Standard Demographic and Health Survey                    |   |   | x | x |
|             | (NPL-08) | 2001 Census                                                    |   | x |   | x |
|             | (NPL-09) | 2001 Standard Demographic and Health Survey                    |   |   | x | x |
|             | (NPL-10) | 2006 Standard Demographic and Health Survey                    |   |   | x | x |
|             | (NPL-11) | 2011 Standard Demographic and Health Survey                    |   |   | x | x |
| Netherlands |          |                                                                |   |   |   |   |
|             | (NLD-01) | 1950-11 Vital Registration                                     | x |   |   |   |
| New Zealand |          |                                                                |   |   |   |   |
|             | (NZL-01) | 1950-11 Vital Registration                                     | x |   |   |   |
| Nicaragua   |          |                                                                |   |   |   |   |
|             | (NIC-01) | 1950-65, 1968-69, 1973-78, 1987-94, 1996-11 Vital Registration | x |   |   |   |
|             | (NIC-02) | 1971 Census                                                    |   |   |   | x |
|             | (NIC-03) | 1977-78 National Retrospective Demographic Survey              |   |   |   | x |
|             | (NIC-04) | 1985-86 Socio-Demographic Survey                               |   |   |   | x |
|             | (NIC-05) | 1992-93 Reproductive Health Survey                             |   |   | x | x |
|             | (NIC-06) | 1993 Living Standards Measurement Study                        |   |   |   | x |
|             | (NIC-07) | 1995 Census                                                    |   |   |   | x |
|             | (NIC-08) | 1997-98 Standard Demographic and Health Survey                 |   |   | x | x |
|             | (NIC-09) | 2001 Living Standards Measurement Study                        |   |   |   | x |
|             | (NIC-10) | 2001 Standard Demographic and Health Survey                    |   |   | x | x |
|             | (NIC-11) | 2005 Census                                                    |   |   |   | x |
|             | (NIC-12) | 2005 Living Standards Measurement Study                        |   |   |   | x |
|             | (NIC-13) | 2006-07 Reproductive Health Survey                             |   |   | x | x |
| Niger       |          |                                                                |   |   |   |   |
|             | (NER-01) | 1992 Standard Demographic and Health Survey                    |   |   | x | x |
|             | (NER-02) | 1996 Multiple Indicator Cluster Survey (Report)                |   |   |   | x |
|             | (NER-03) | 1998 Standard Demographic and Health Survey                    |   |   | x | x |
|             | (NER-04) | 2000 Multiple Indicator Cluster Survey                         |   |   |   | x |
|             | (NER-05) | 2006 Standard Demographic and Health Survey                    |   |   | x | x |
|             | (NER-06) | 2012 Standard Demographic and Health Survey                    |   |   | x | x |

|             |          |                                                             |   |   |   |   |
|-------------|----------|-------------------------------------------------------------|---|---|---|---|
| Nigeria     |          |                                                             |   |   |   |   |
|             | (NGA-01) | 1981-82 World Fertility Survey                              |   |   |   | x |
|             | (NGA-02) | 1990 Standard Demographic and Health Survey                 |   |   | x | x |
|             | (NGA-03) | 1999 Standard Demographic and Health Survey (Report)        |   |   | x |   |
|             | (NGA-04) | 2003 Standard Demographic and Health Survey                 |   |   | x | x |
|             | (NGA-05) | 2007 General Household Survey                               |   | x |   | x |
|             | (NGA-06) | 2007 Multiple Indicator Cluster Survey                      |   |   |   | x |
|             | (NGA-07) | 2007 Vital Registration                                     | x |   |   |   |
|             | (NGA-08) | 2008 Standard Demographic and Health Survey                 |   |   | x | x |
|             | (NGA-09) | 2010 Malaria Indicator Survey                               |   |   | x | x |
|             | (NGA-10) | 2011 Multiple Indicator Cluster Survey                      |   |   |   | x |
|             | (NGA-11) | 2013 Standard Demographic and Health Survey (Report)        |   |   | x |   |
| North Korea |          |                                                             |   |   |   |   |
|             | (PRK-01) | 1993 Census                                                 |   | x |   |   |
|             | (PRK-02) | 2008 Census                                                 |   | x |   |   |
| Norway      |          |                                                             |   |   |   |   |
|             | (NOR-01) | 1950-12 Vital Registration                                  | x |   |   |   |
| Oman        |          |                                                             |   |   |   |   |
|             | (OMN-01) | 1975 Sociodemographic Survey in 5 Towns                     |   |   |   | x |
|             | (OMN-02) | 1977-79 Sociodemographic Survey in 11 Towns                 |   |   |   | x |
|             | (OMN-03) | 1988-89 Oman Child Health Survey                            |   |   | x | x |
|             | (OMN-04) | 1993 Census                                                 |   |   |   | x |
|             | (OMN-05) | 1995 Gulf Family Health Survey                              |   |   | x |   |
|             | (OMN-06) | 2001, 2003-04, 2007 Vital Registration                      | x |   |   |   |
| Pakistan    |          |                                                             |   |   |   |   |
|             | (PAK-01) | 1962-65 Population Growth Estimation Experiment             |   | x |   |   |
|             | (PAK-02) | 1968, 1976-79, 1984-93, 1997, 2001 Population Growth Survey | x |   |   |   |
|             | (PAK-03) | 1973 Housing, Economic, Demographic Characteristics Survey  |   |   |   | x |
|             | (PAK-04) | 1975 World Fertility Survey                                 |   |   | x | x |
|             | (PAK-05) | 1981 Census                                                 |   |   |   | x |
|             | (PAK-06) | 1984-85 Contraceptive Prevalence Survey                     |   |   |   | x |
|             | (PAK-07) | 1990-91 Standard Demographic and Health Survey              |   |   | x | x |
|             | (PAK-08) | 1991 Demographic Survey                                     |   | x |   |   |
|             | (PAK-09) | 1991 Living Standards Measurement Study                     |   |   | x | x |
|             | (PAK-10) | 1992 Demographic Survey                                     |   | x |   |   |
|             | (PAK-11) | 1995 Demographic Survey                                     |   | x |   |   |
|             | (PAK-12) | 1995, 1999 Population Growth Survey (Report)                | x |   |   |   |
|             | (PAK-13) | 1996 Demographic Survey                                     |   | x |   |   |
|             | (PAK-14) | 1996 Fertility and Planning Survey                          |   |   | x | x |
|             | (PAK-15) | 1997 Demographic Survey                                     |   | x |   |   |
|             | (PAK-16) | 1998-99 Integrated Household Survey                         |   |   |   | x |
|             | (PAK-17) | 1999 Demographic Survey                                     |   | x |   |   |
|             | (PAK-18) | 2000 Reproductive Health and Family Planning Survey         |   |   | x |   |
|             | (PAK-19) | 2001-02 Integrated Household Survey                         |   |   |   | x |
|             | (PAK-20) | 2003, 2005, 2007 Demographic Survey                         | x |   |   |   |



|                  |          |                                                        |   |   |   |   |
|------------------|----------|--------------------------------------------------------|---|---|---|---|
|                  | (PAK-21) | 2005-06 Social and Living Standards Measurement Survey |   |   |   | x |
|                  | (PAK-22) | 2006-07 Standard Demographic and Health Survey         |   |   | x | x |
|                  | (PAK-23) | 2006 Demographic Survey (Report)                       | x |   |   |   |
|                  | (PAK-24) | 2007-08 Social and Living Standards Measurement Survey |   |   |   | x |
|                  | (PAK-25) | 2012-13 Standard Demographic and Health Survey         |   |   | x | x |
| Palestine        |          |                                                        |   |   |   |   |
|                  | (PSE-01) | 1995 Demographic Survey                                |   |   | x |   |
|                  | (PSE-02) | 1997 Census                                            |   |   |   | x |
|                  | (PSE-03) | 1999-2003 Demographic and Health Survey                |   |   | x |   |
|                  | (PSE-04) | 2000 Palestine Health Survey                           |   |   | x |   |
|                  | (PSE-05) | 2000, 2002-04, 2006-09 Vital Registration              | x |   |   |   |
|                  | (PSE-06) | 2006 Pan Arab Project for Family Health                |   |   | x |   |
|                  | (PSE-07) | 2007 Census                                            |   |   |   | x |
|                  | (PSE-08) | 2010 Multiple Indicator Cluster Survey (Report)        |   |   | x |   |
| Panama           |          |                                                        |   |   |   |   |
|                  | (PAN-01) | 1950, 1952-10 Vital Registration                       | x |   |   |   |
|                  | (PAN-02) | 1960 Census                                            |   |   |   | x |
|                  | (PAN-03) | 1975-76 World Fertility Survey                         |   |   | x | x |
|                  | (PAN-04) | 1975-77 National Demographic Survey                    |   |   | x | x |
|                  | (PAN-05) | 1980 Census                                            |   |   |   | x |
|                  | (PAN-06) | 1990 Census                                            |   |   |   | x |
|                  | (PAN-07) | 1997 Living Standards Measurement Study                |   |   |   | x |
|                  | (PAN-08) | 2000 Census                                            |   | x |   | x |
|                  | (PAN-09) | 2003 Living Standards Measurement Study                |   |   |   | x |
| Papua New Guinea |          |                                                        |   |   |   |   |
|                  | (PNG-01) | 1971 Census                                            |   |   |   | x |
|                  | (PNG-02) | 1977, 1980 Vital Registration                          | x |   |   |   |
|                  | (PNG-03) | 1980 Census                                            |   |   |   | x |
|                  | (PNG-04) | 1991 Demographic and Health Survey (Report)            |   |   |   | x |
|                  | (PNG-05) | 1996 Demographic and Health Survey (Report)            |   |   | x | x |
|                  | (PNG-06) | 2000 Census                                            |   |   |   | x |
|                  | (PNG-07) | 2006 Demographic and Health Survey (Report)            |   |   | x |   |
| Paraguay         |          |                                                        |   |   |   |   |
|                  | (PRY-01) | 1950-92, 1994-10 Vital Registration                    | x |   |   |   |
|                  | (PRY-02) | 1972 Census                                            |   |   |   | x |
|                  | (PRY-03) | 1977 National Demographic Survey                       |   |   |   | x |
|                  | (PRY-04) | 1979 World Fertility Survey                            |   |   |   | x |
|                  | (PRY-05) | 1982 Census                                            |   |   |   | x |
|                  | (PRY-06) | 1990 Standard Demographic and Health Survey            |   |   | x | x |
|                  | (PRY-07) | 1992 Census                                            |   |   |   | x |
|                  | (PRY-08) | 1995-96 Reproductive Health Survey                     |   |   | x | x |
|                  | (PRY-09) | 1997 Integrated Household Survey                       |   |   |   | x |
|                  | (PRY-10) | 1998 Reproductive Health Survey                        |   |   | x | x |
|                  | (PRY-11) | 2000 Integrated Household Survey                       |   |   |   | x |

|             |          |                                                                 |   |  |   |   |
|-------------|----------|-----------------------------------------------------------------|---|--|---|---|
|             | (PRY-12) | 2002 Census                                                     |   |  |   | X |
|             | (PRY-13) | 2004 Reproductive Health Survey                                 |   |  | X | X |
|             | (PRY-14) | 2008 Reproductive Health Survey                                 |   |  | X | X |
| Peru        |          |                                                                 |   |  |   |   |
|             | (PER-01) | 1950-64, 1966-73, 1975-92, 1994-10 Vital Registration           | X |  |   |   |
|             | (PER-02) | 1972 Census                                                     |   |  |   | X |
|             | (PER-03) | 1974-76 National Demographic Survey                             |   |  | X | X |
|             | (PER-04) | 1977-78 World Fertility Survey                                  |   |  | X | X |
|             | (PER-05) | 1981 Census                                                     |   |  |   | X |
|             | (PER-06) | 1981 National Survey of Contraceptive Prevalence                |   |  |   | X |
|             | (PER-07) | 1985 Living Standards Measurement Study                         |   |  |   | X |
|             | (PER-08) | 1986 Standard Demographic and Health Survey                     |   |  | X | X |
|             | (PER-09) | 1991-92 Standard Demographic and Health Survey                  |   |  | X | X |
|             | (PER-10) | 1993 Census                                                     |   |  |   | X |
|             | (PER-11) | 1994 Living Standards Measurement Study                         |   |  |   | X |
|             | (PER-12) | 1996 Standard Demographic and Health Survey                     |   |  | X | X |
|             | (PER-13) | 2000 Standard Demographic and Health Survey                     |   |  | X | X |
|             | (PER-14) | 2004 Continuous Demographic and Health Survey                   |   |  | X | X |
|             | (PER-15) | 2005 Continuous Demographic and Health Survey                   |   |  | X | X |
|             | (PER-16) | 2006 Continuous Demographic and Health Survey                   |   |  | X | X |
|             | (PER-17) | 2007 Census                                                     |   |  |   | X |
|             | (PER-18) | 2007 Continuous Demographic and Health Survey                   |   |  | X | X |
|             | (PER-19) | 2008 Continuous Demographic and Health Survey                   |   |  | X | X |
|             | (PER-20) | 2009 Continuous Demographic and Health Survey                   |   |  | X | X |
|             | (PER-21) | 2010 Continuous Demographic and Health Survey                   |   |  | X | X |
|             | (PER-22) | 2011 Continuous Demographic and Health Survey                   |   |  | X | X |
|             | (PER-23) | 2012 Continuous Demographic and Health Survey                   |   |  | X | X |
| Philippines |          |                                                                 |   |  |   |   |
|             | (PHL-01) | 1950-53, 1956-98, 2004-05, 2008-09 Vital Registration           | X |  |   |   |
|             | (PHL-02) | 1958 Philippine Statistical Sample Survey of Private Households |   |  |   | X |
|             | (PHL-03) | 1970 Census                                                     |   |  |   | X |
|             | (PHL-04) | 1978 World Fertility Survey                                     |   |  | X | X |
|             | (PHL-05) | 1980 Census                                                     |   |  |   | X |
|             | (PHL-06) | 1990 Census                                                     |   |  |   | X |
|             | (PHL-07) | 1993 Standard Demographic and Health Survey                     |   |  | X | X |
|             | (PHL-08) | 1998 Standard Demographic and Health Survey                     |   |  | X | X |
|             | (PHL-09) | 2003 Standard Demographic and Health Survey                     |   |  | X | X |
|             | (PHL-10) | 2008 Standard Demographic and Health Survey                     |   |  | X | X |
|             | (PHL-11) | 2011 Standard Demographic and Health Survey                     |   |  | X | X |
| Poland      |          |                                                                 |   |  |   |   |
|             | (POL-01) | 1950-11 Vital Registration                                      | X |  |   |   |
|             | (POL-02) | 1970 Census                                                     |   |  |   | X |
| Portugal    |          |                                                                 |   |  |   |   |
|             | (PRT-01) | 1950-11 Vital Registration                                      | X |  |   |   |
|             | (PRT-02) | 1979-80 World Fertility Survey                                  |   |  | X | X |

|                                  |          |                                                                                           |   |   |   |   |
|----------------------------------|----------|-------------------------------------------------------------------------------------------|---|---|---|---|
| Qatar                            |          |                                                                                           |   |   |   |   |
|                                  | (QAT-01) | 1981-90, 1992-97, 1999-11 Vital Registration                                              | x |   |   |   |
|                                  | (QAT-02) | 1987 Child Health Survey                                                                  |   |   | x | x |
|                                  | (QAT-03) | 1998 Gulf Family Health Survey                                                            |   |   | x |   |
| Romania                          |          |                                                                                           |   |   |   |   |
|                                  | (ROU-01) | 1956-11 Vital Registration                                                                | x |   |   |   |
|                                  | (ROU-02) | 1966 Census                                                                               |   |   |   | x |
|                                  | (ROU-03) | 1977 Census                                                                               |   |   |   | x |
|                                  | (ROU-04) | 1994 Living Standards Measurement Study                                                   |   |   | x | x |
|                                  | (ROU-05) | 1999 Reproductive Health Survey                                                           |   |   | x |   |
| Russia                           |          |                                                                                           |   |   |   |   |
|                                  | (RUS-01) | 1959-12 Vital Registration                                                                | x |   |   |   |
|                                  | (RUS-02) | 1989 Census                                                                               |   |   |   | x |
| Rwanda                           |          |                                                                                           |   |   |   |   |
|                                  | (RWA-01) | 1970 Sample Survey                                                                        |   |   |   | x |
|                                  | (RWA-02) | 1978 Census                                                                               |   |   |   | x |
|                                  | (RWA-03) | 1983 World Fertility Survey                                                               |   |   | x | x |
|                                  | (RWA-04) | 1991 Census                                                                               |   |   |   | x |
|                                  | (RWA-05) | 1992 Standard Demographic and Health Survey                                               |   |   | x | x |
|                                  | (RWA-06) | 1996 Socio-Demographic Survey                                                             |   |   |   | x |
|                                  | (RWA-07) | 2000 Standard Demographic and Health Survey                                               |   |   | x | x |
|                                  | (RWA-08) | 2002 Census                                                                               |   | x |   | x |
|                                  | (RWA-09) | 2005 Standard Demographic and Health Survey                                               |   |   | x | x |
|                                  | (RWA-10) | 2006 Integrated Living Conditions Survey                                                  |   |   |   | x |
|                                  | (RWA-11) | 2007-08 Interim Demographic and Health Survey                                             |   |   | x | x |
|                                  | (RWA-12) | 2010-11 Standard Demographic and Health Survey                                            |   |   | x | x |
| Saint Lucia                      |          |                                                                                           |   |   |   |   |
|                                  | (LCA-01) | 1950-61, 1963, 1968, 1972-06, 2008 Vital Registration                                     | x |   |   |   |
| Saint Vincent and the Grenadines |          |                                                                                           |   |   |   |   |
|                                  | (VCT-01) | 1950-56, 1960-64, 1970-72, 1974, 1977-80, 1982-88, 1990, 1992, 1995-10 Vital Registration | x |   |   |   |
| Samoa                            |          |                                                                                           |   |   |   |   |
|                                  | (WSM-01) | 1955-69, 1973-76, 1978, 1980 Vital Registration                                           | x |   |   |   |
|                                  | (WSM-02) | 1956 Census                                                                               |   |   |   | x |
|                                  | (WSM-03) | 1961 Census                                                                               |   |   |   | x |
|                                  | (WSM-04) | 1966 Census                                                                               |   |   |   | x |
|                                  | (WSM-05) | 1976 Census                                                                               |   |   |   | x |
|                                  | (WSM-06) | 1981 Census                                                                               |   |   |   | x |
|                                  | (WSM-07) | 1999 Secretariat of the Pacific Community Demographic and Health Survey                   |   |   | x |   |
|                                  | (WSM-08) | 2006 Census                                                                               |   | x |   |   |
|                                  | (WSM-09) | 2009 Standard Demographic and Health Survey (Report)                                      |   |   | x |   |
|                                  | (WSM-10) | 2011 Census                                                                               |   | x |   |   |
| Sao Tome and Principe            |          |                                                                                           |   |   |   |   |
|                                  | (STP-01) | 1955-58, 1962-71, 1977-79, 1984-85, 1987 Vital Registration                               | x |   |   |   |
|                                  | (STP-02) | 1981 Census                                                                               |   |   |   | x |

|              |          |                                                                     |   |   |   |   |
|--------------|----------|---------------------------------------------------------------------|---|---|---|---|
|              | (STP-03) | 1991 Census                                                         |   |   |   | x |
|              | (STP-04) | 2000 Multiple Indicator Cluster Survey                              |   |   |   | x |
|              | (STP-05) | 2006 Multiple Indicator Cluster Survey                              |   |   |   | x |
|              | (STP-06) | 2008-09 Standard Demographic and Health Survey                      |   |   | x | x |
| Saudi Arabia |          |                                                                     |   |   |   |   |
|              | (SAU-01) | 1987-88 Child Health Survey                                         |   |   |   | x |
|              | (SAU-02) | 1990 Levels, Trends and Differentials of Infant and Child Mortality |   |   |   | x |
|              | (SAU-03) | 1996 Gulf Family Health Survey                                      |   |   | x |   |
|              | (SAU-04) | 2004 Census                                                         |   | x |   |   |
|              | (SAU-05) | 2007 Saudi Arabia Demographic Research Bulletin                     |   | x |   |   |
| Senegal      |          |                                                                     |   |   |   |   |
|              | (SEN-01) | 1978 World Fertility Survey                                         |   |   | x | x |
|              | (SEN-02) | 1986 Standard Demographic and Health Survey                         |   |   | x | x |
|              | (SEN-03) | 1992-93 Standard Demographic and Health Survey                      |   |   | x | x |
|              | (SEN-04) | 1996 Multiple Indicator Cluster Survey                              |   |   | x |   |
|              | (SEN-05) | 1997 Standard Demographic and Health Survey                         |   |   | x | x |
|              | (SEN-06) | 2000 Multiple Indicator Cluster Survey                              |   | x |   |   |
|              | (SEN-07) | 2002 Census                                                         |   | x |   |   |
|              | (SEN-08) | 2005 Standard Demographic and Health Survey                         |   |   | x | x |
|              | (SEN-09) | 2006 Malaria Indicator Survey                                       |   |   | x | x |
|              | (SEN-10) | 2008-09 Malaria Indicator Survey                                    |   |   | x | x |
|              | (SEN-11) | 2010-11 Standard Demographic and Health Survey                      |   |   | x | x |
|              | (SEN-12) | 2012-13 Standard Demographic and Health Survey                      |   |   | x | x |
| Serbia       |          |                                                                     |   |   |   |   |
|              | (SRB-01) | 1953 Census                                                         |   | x |   |   |
|              | (SRB-02) | 1961 Census                                                         |   | x |   |   |
|              | (SRB-03) | 1971 Census                                                         |   | x |   |   |
|              | (SRB-04) | 1991 Census                                                         |   | x |   |   |
|              | (SRB-05) | 1995-12 Vital Registration                                          | x |   |   |   |
|              | (SRB-06) | 2005-06 Multiple Indicator Cluster Survey                           |   |   |   | x |
|              | (SRB-07) | 2010 Multiple Indicator Cluster Survey                              |   |   |   | x |
| Seychelles   |          |                                                                     |   |   |   |   |
|              | (SYC-01) | 1952-57, 1959, 1961-96, 1998-12 Vital Registration                  | x |   |   |   |
|              | (SYC-02) | 1960 Census                                                         |   | x |   | x |
|              | (SYC-03) | 1971 Census                                                         |   |   |   | x |
| Sierra Leone |          |                                                                     |   |   |   |   |
|              | (SLE-01) | 1973 Pilot Census                                                   |   |   |   | x |
|              | (SLE-02) | 1974 Census                                                         |   |   |   | x |
|              | (SLE-03) | 1985 Census                                                         |   |   |   | x |
|              | (SLE-04) | 2000 Multiple Indicator Cluster Survey                              |   |   |   | x |
|              | (SLE-05) | 2004 Census                                                         |   | x |   | x |
|              | (SLE-06) | 2005 Multiple Indicator Cluster Survey                              |   |   |   | x |
|              | (SLE-07) | 2008 Standard Demographic and Health Survey                         |   |   | x | x |
|              | (SLE-08) | 2010 Multiple Indicator Cluster Survey                              |   |   |   | x |
|              | (SLE-09) | 2013 Standard Demographic and Health Survey (Report)                |   |   | x |   |

|                 |          |                                                          |   |   |   |   |
|-----------------|----------|----------------------------------------------------------|---|---|---|---|
| Singapore       |          |                                                          |   |   |   |   |
|                 | (SGP-01) | 1950-11 Vital Registration                               | x |   |   |   |
| Slovakia        |          |                                                          |   |   |   |   |
|                 | (SVK-01) | 1950-11 Vital Registration                               | x |   |   |   |
| Slovenia        |          |                                                          |   |   |   |   |
|                 | (SVN-01) | 1982-11 Vital Registration                               | x |   |   |   |
| Solomon Islands |          |                                                          |   |   |   |   |
|                 | (SLB-01) | 1970 Census                                              |   |   |   | x |
|                 | (SLB-02) | 1976 Census                                              |   |   |   | x |
|                 | (SLB-03) | 1999 Census                                              |   |   | x | x |
|                 | (SLB-04) | 2006-07 Standard Demographic and Health Survey (Report)  |   |   | x |   |
| Somalia         |          |                                                          |   |   |   |   |
|                 | (SOM-01) | 1999 Multiple Indicator Cluster Survey                   |   |   |   | x |
|                 | (SOM-02) | 2006 Multiple Indicator Cluster Survey                   |   |   | x | x |
| South Africa    |          |                                                          |   |   |   |   |
|                 | (ZAF-01) | 1980-82, 1993-10 Vital Registration                      | x |   |   |   |
|                 | (ZAF-02) | 1990 Survey Conducted by Human Sciences Research Council |   | x |   |   |
|                 | (ZAF-03) | 1993 Living Standards Measurement Study                  |   |   |   | x |
|                 | (ZAF-04) | 1993 October Household Survey                            |   | x |   |   |
|                 | (ZAF-05) | 1995 October Household Survey                            |   | x |   |   |
|                 | (ZAF-06) | 1996 Census                                              |   |   |   | x |
|                 | (ZAF-07) | 1996 October Household Survey                            |   | x |   |   |
|                 | (ZAF-08) | 1997 October Household Survey                            |   | x |   |   |
|                 | (ZAF-09) | 1998 October Household Survey                            |   | x |   |   |
|                 | (ZAF-10) | 1998 Standard Demographic and Health Survey              |   |   | x | x |
|                 | (ZAF-11) | 2001 Census                                              |   | x |   | x |
|                 | (ZAF-12) | 2003 Standard Demographic and Health Survey (Report)     |   |   | x |   |
|                 | (ZAF-13) | 2007 Community Survey                                    |   | x |   | x |
|                 | (ZAF-14) | 2011 Census                                              |   | x |   |   |
| South Korea     |          |                                                          |   |   |   |   |
|                 | (KOR-01) | 1957, 1960, 1962-64, 1966-67, 1977-11 Vital Registration | x |   |   |   |
|                 | (KOR-02) | 1970 Census                                              |   |   |   | x |
|                 | (KOR-03) | 1974 World Fertility Survey                              |   |   | x | x |
|                 | (KOR-04) | 1975 Census                                              |   |   |   | x |
|                 | (KOR-05) | 1980 Census                                              |   |   |   | x |
|                 | (KOR-06) | 1985 Census                                              |   |   |   | x |
|                 | (KOR-07) | 1990 Census                                              |   |   |   | x |
| South Sudan     |          |                                                          |   |   |   |   |
|                 | (SSD-01) | 2008 Census                                              |   | x |   | x |
|                 | (SSD-02) | 2010 Household Health Survey                             |   |   |   | x |
| Spain           |          |                                                          |   |   |   |   |
|                 | (ESP-01) | 1950-11 Vital Registration                               | x |   |   |   |
| Sri Lanka       |          |                                                          |   |   |   |   |
|                 | (LKA-01) | 1950-89, 1991-95, 2004-07 Vital Registration             | x |   |   |   |
|                 | (LKA-02) | 1971 Census                                              |   |   |   | x |

|                    |          |                                                                         |   |   |   |   |
|--------------------|----------|-------------------------------------------------------------------------|---|---|---|---|
|                    | (LKA-03) | 1975 World Fertility Survey                                             |   |   | x | x |
|                    | (LKA-04) | 1987 Standard Demographic and Health Survey                             |   |   | x | x |
|                    | (LKA-05) | 1993 Demographic and Health Survey (Report)                             |   |   | x |   |
|                    | (LKA-06) | 2000 Demographic and Health Survey (Report)                             |   |   | x |   |
|                    | (LKA-07) | 2001 Census                                                             |   |   |   | x |
|                    | (LKA-08) | 2006-2007 Standard Demographic and Health Survey (Report)               |   |   | x |   |
| <b>Sudan</b>       |          |                                                                         |   |   |   |   |
|                    | (SDN-01) | 1973 Census                                                             |   |   |   | x |
|                    | (SDN-02) | 1978-79 World Fertility Survey                                          |   |   | x |   |
|                    | (SDN-03) | 1983 Census                                                             |   |   |   | x |
|                    | (SDN-04) | 1989-90 Standard Demographic and Health Survey                          |   |   | x | x |
|                    | (SDN-05) | 1992-93 Pan Arab Project for Child Development                          |   |   | x | x |
|                    | (SDN-06) | 1993 Census                                                             |   |   |   | x |
|                    | (SDN-07) | 1999 Safe Motherhood Survey                                             |   |   | x |   |
|                    | (SDN-08) | 2000 Multiple Indicator Cluster Survey (Report)                         |   |   |   | x |
|                    | (SDN-09) | 2006 Pan Arab Project Family Health                                     |   |   | x |   |
|                    | (SDN-10) | 2008 Census                                                             |   | x |   | x |
|                    | (SDN-11) | 2010 Multiple Indicator Cluster Survey (Report)                         |   |   | x |   |
| <b>Suriname</b>    |          |                                                                         |   |   |   |   |
|                    | (SUR-01) | 1950-57, 1961-66, 1971-73, 1975-82, 1984-06, 2008-09 Vital Registration | x |   |   |   |
|                    | (SUR-02) | 1999-00 Multiple Indicator Cluster Survey                               |   |   |   | x |
|                    | (SUR-03) | 2006 Multiple Indicator Cluster Survey                                  |   |   |   | x |
| <b>Swaziland</b>   |          |                                                                         |   |   |   |   |
|                    | (SWZ-01) | 1966 Census                                                             |   |   |   | x |
|                    | (SWZ-02) | 1976 Census                                                             |   |   |   | x |
|                    | (SWZ-03) | 1986 Census                                                             |   |   |   | x |
|                    | (SWZ-04) | 1997 Census                                                             |   | x |   |   |
|                    | (SWZ-05) | 2000 Multiple Indicator Cluster Survey                                  |   |   |   | x |
|                    | (SWZ-06) | 2006-07 Standard Demographic and Health Survey                          |   |   | x | x |
|                    | (SWZ-07) | 2007 Census                                                             |   | x |   |   |
|                    | (SWZ-08) | 2010 Multiple Indicator Cluster Survey                                  |   |   | x | x |
| <b>Sweden</b>      |          |                                                                         |   |   |   |   |
|                    | (SWE-01) | 1950-11 Vital Registration                                              | x |   |   |   |
| <b>Switzerland</b> |          |                                                                         |   |   |   |   |
|                    | (CHE-01) | 1950-11 Vital Registration                                              | x |   |   |   |
|                    | (CHE-02) | 1960 Census                                                             |   |   |   | x |
| <b>Syria</b>       |          |                                                                         |   |   |   |   |
|                    | (SYR-01) | 1964-78, 1983-85, 2005-07 Vital Registration                            | x |   |   |   |
|                    | (SYR-02) | 1970 Census                                                             |   |   |   | x |
|                    | (SYR-03) | 1976 Sample Population Census                                           |   |   |   | x |
|                    | (SYR-04) | 1978 World Fertility Survey                                             |   |   | x | x |
|                    | (SYR-05) | 1981 Census                                                             |   |   |   | x |
|                    | (SYR-06) | 1990 Syria EPI/CDD and Child Mortality Survey                           |   |   |   | x |
|                    | (SYR-07) | 1993 Pan Arab Project for Child Development                             |   |   | x | x |
|                    | (SYR-08) | 1994 Census                                                             |   |   |   | x |

|                            |          |                                                    |   |   |   |   |
|----------------------------|----------|----------------------------------------------------|---|---|---|---|
|                            | (SYR-09) | 1999 Multipurpose Survey                           |   | x |   |   |
|                            | (SYR-10) | 2000 Multiple Indicator Cluster Survey (Report)    |   | x |   |   |
|                            | (SYR-11) | 2001 Pan Arab Project for Family Health            |   |   | x | x |
|                            | (SYR-12) | 2006 Multiple Indicator Cluster Survey             |   |   |   | x |
| Taiwan (Province of China) |          |                                                    |   |   |   |   |
|                            | (TWN-01) | 1955-12 Vital Registration                         | x |   |   |   |
| Tajikistan                 |          |                                                    |   |   |   |   |
|                            | (TJK-01) | 1981-82, 1985-05, 2007-08, 2011 Vital Registration | x |   |   |   |
|                            | (TJK-02) | 1989 Census                                        |   |   |   | x |
|                            | (TJK-03) | 1999 Living Standards Measurement Study            |   |   |   | x |
|                            | (TJK-04) | 2000 Multiple Indicator Cluster Survey             |   |   |   | x |
|                            | (TJK-05) | 2002 Demographic Survey                            |   |   | x | x |
|                            | (TJK-06) | 2003 Living Standards Measurement Study            |   |   |   | x |
|                            | (TJK-07) | 2005 Multiple Indicator Cluster Survey             |   |   |   | x |
|                            | (TJK-08) | 2007 Living Standards Measurement Study            |   |   | x | x |
|                            | (TJK-09) | 2010 Survey on Infant Child and Maternal Mortality |   |   | x |   |
|                            | (TJK-10) | 2012 Standard Demographic and Health Survey        |   |   | x | x |
| Tanzania                   |          |                                                    |   |   |   |   |
|                            | (TZA-01) | 1967 Census                                        |   | x |   |   |
|                            | (TZA-02) | 1973 National Demographic Survey of Tanzania       |   | x |   |   |
|                            | (TZA-03) | 1978 Census                                        |   |   |   | x |
|                            | (TZA-04) | 1988 Census                                        |   |   |   | x |
|                            | (TZA-05) | 1991-92 Standard Demographic and Health Survey     |   |   | x | x |
|                            | (TZA-06) | 1993 Living Standards Measurement Study            |   |   |   | x |
|                            | (TZA-07) | 1996 Standard Demographic and Health Survey        |   |   | x | x |
|                            | (TZA-08) | 1999 Standard Demographic and Health Survey        |   |   | x | x |
|                            | (TZA-09) | 2002 Census                                        |   | x |   | x |
|                            | (TZA-10) | 2003-04 AIDS Indicator Survey                      |   |   | x | x |
|                            | (TZA-11) | 2004-05 Standard Demographic and Health Survey     |   |   | x | x |
|                            | (TZA-12) | 2007-08 AIDS Indicator Survey                      |   |   | x | x |
|                            | (TZA-13) | 2009-10 Standard Demographic and Health Survey     |   |   | x | x |
|                            | (TZA-14) | 2011-12 AIDS Indicator Survey                      |   |   | x | x |
| Thailand                   |          |                                                    |   |   |   |   |
|                            | (THA-01) | 1950-00, 2002-09 Vital Registration                | x |   |   |   |
|                            | (THA-02) | 1970 Census                                        |   |   |   | x |
|                            | (THA-03) | 1975 World Fertility Survey                        |   |   | x | x |
|                            | (THA-04) | 1980 Census                                        |   |   |   | x |
|                            | (THA-05) | 1987 Standard Demographic and Health Survey        |   |   | x | x |
|                            | (THA-06) | 1989 Survey of Population Change                   |   |   |   | x |
|                            | (THA-07) | 1990 Census                                        |   |   |   | x |
|                            | (THA-08) | 1995 Survey of Population Change                   |   |   | x |   |
|                            | (THA-09) | 2000 Census                                        |   |   |   | x |
|                            | (THA-10) | 2005-06 Multiple Indicator Cluster Survey          |   |   |   | x |
| The Bahamas                |          |                                                    |   |   |   |   |

|                     |          |                                                                   |   |   |   |   |
|---------------------|----------|-------------------------------------------------------------------|---|---|---|---|
|                     | (BHS-01) | 1965, 1967-69, 1971-08 Vital Registration                         | x |   |   |   |
| The Gambia          |          |                                                                   |   |   |   |   |
|                     | (GMB-01) | 1973 Census                                                       |   |   |   | x |
|                     | (GMB-02) | 1983 Census                                                       |   |   |   | x |
|                     | (GMB-03) | 1990 Contraceptive Prevalence and Fertility Determinants Survey   |   |   | x |   |
|                     | (GMB-04) | 1993 Census                                                       |   |   |   | x |
|                     | (GMB-05) | 2000 Multiple Indicator Cluster Survey                            |   |   |   | x |
|                     | (GMB-06) | 2005-06 Multiple Indicator Cluster Survey                         |   |   |   | x |
|                     | (GMB-07) | 2010 Multiple Indicator Cluster Survey (Report)                   |   |   |   | x |
|                     | (GMB-08) | 2013 Standard Demographic and Health Survey (Report)              |   |   | x |   |
| Timor-Leste         |          |                                                                   |   |   |   |   |
|                     | (TLS-01) | 1991 Standard Demographic and Health Survey                       |   |   | x | x |
|                     | (TLS-02) | 1994 Standard Demographic and Health Survey                       |   |   | x | x |
|                     | (TLS-03) | 1997 Standard Demographic and Health Survey                       |   |   | x | x |
|                     | (TLS-04) | 2001 Living Standards Measurement Study                           |   |   |   | x |
|                     | (TLS-05) | 2003 Standard Demographic and Health Survey                       |   |   |   | x |
|                     | (TLS-06) | 2004 Census                                                       |   |   |   | x |
|                     | (TLS-07) | 2009-10 Standard Demographic and Health Survey                    |   |   | x | x |
| Togo                |          |                                                                   |   |   |   |   |
|                     | (TGO-01) | 1961 Census                                                       |   |   |   | x |
|                     | (TGO-02) | 1961 Demographic Survey                                           |   | x |   |   |
|                     | (TGO-03) | 1971 Demographic Survey                                           |   |   |   | x |
|                     | (TGO-04) | 1988 Standard Demographic and Health Survey                       |   |   | x | x |
|                     | (TGO-05) | 1998 Standard Demographic and Health Survey                       |   |   | x | x |
|                     | (TGO-06) | 2006 Multiple Indicator Cluster Survey                            |   |   |   | x |
|                     | (TGO-07) | 2010 Census                                                       |   | x |   | x |
|                     | (TGO-08) | 2010 Multiple Indicator Cluster Survey                            |   |   |   | x |
| Tonga               |          |                                                                   |   |   |   |   |
|                     | (TON-01) | 1957-64, 1966, 1982-83, 1990, 2003-04 Vital Registration          | x |   |   |   |
|                     | (TON-02) | 1966 Census                                                       |   |   |   | x |
|                     | (TON-03) | 1976 Census                                                       |   |   |   | x |
|                     | (TON-04) | 1986 Census                                                       |   |   |   | x |
|                     | (TON-05) | 2006 Census                                                       |   | x |   |   |
| Trinidad and Tobago |          |                                                                   |   |   |   |   |
|                     | (TTO-01) | 1950-02, 2005-08 Vital Registration                               | x |   |   |   |
|                     | (TTO-02) | 1977 World Fertility Survey                                       |   |   | x | x |
|                     | (TTO-03) | 1987 Standard Demographic and Health Survey                       |   |   | x | x |
|                     | (TTO-04) | 2000 Multiple Indicator Cluster Survey                            |   |   |   | x |
|                     | (TTO-05) | 2006 Multiple Indicator Cluster Survey                            |   |   |   | x |
| Tunisia             |          |                                                                   |   |   |   |   |
|                     | (TUN-01) | 1960, 1968-74, 1976-80, 1987-89, 1993-95, 1998 Vital Registration | x |   |   |   |
|                     | (TUN-02) | 1968-69 National Demographic Survey                               |   |   | x |   |
|                     | (TUN-03) | 1975 Census                                                       |   |   |   | x |
|                     | (TUN-04) | 1978 World Fertility Survey                                       |   |   | x | x |



|              |          |                                                |   |   |   |   |
|--------------|----------|------------------------------------------------|---|---|---|---|
|              | (TUN-05) | 1983 Contraceptive Prevalence Survey           |   |   |   | X |
|              | (TUN-06) | 1984 Census                                    |   |   |   | X |
|              | (TUN-07) | 1988 Standard Demographic and Health Survey    |   |   | X | X |
|              | (TUN-08) | 1994-95 Pan Arab Project for Child Development |   |   | X | X |
|              | (TUN-09) | 2002 Pan Arab Project for Family Health        |   |   | X | X |
|              | (TUN-10) | 2011-12 Multiple Indicator Cluster Survey      |   |   | X | X |
| Turkey       |          |                                                |   |   |   |   |
|              | (TUR-01) | 1966-67 Demographic Survey                     |   | X | X | X |
|              | (TUR-02) | 1970 Census                                    |   |   |   | X |
|              | (TUR-03) | 1975 Census                                    |   |   |   | X |
|              | (TUR-04) | 1978-79, 1981-84, 1987-11 Vital Registration   | X |   |   |   |
|              | (TUR-05) | 1978 World Fertility Survey                    |   |   | X | X |
|              | (TUR-06) | 1980 Census                                    |   |   |   | X |
|              | (TUR-07) | 1983 Population and Health Survey              |   |   |   | X |
|              | (TUR-08) | 1985 Census                                    |   |   |   | X |
|              | (TUR-09) | 1988 Population and Health Survey              |   |   | X | X |
|              | (TUR-10) | 1989 Demographic Survey (Report)               |   | X |   | X |
|              | (TUR-11) | 1990 Census                                    |   |   |   | X |
|              | (TUR-12) | 1993 Standard Demographic and Health Survey    |   |   | X | X |
|              | (TUR-13) | 1998 Standard Demographic and Health Survey    |   |   | X | X |
|              | (TUR-14) | 2000 Census                                    |   |   |   | X |
|              | (TUR-15) | 2003-04 Standard Demographic and Health Survey |   |   | X | X |
|              | (TUR-16) | 2008 Demographic and Health Survey             |   |   |   | X |
|              | (TUR-17) | 2011 Infant Mortality Survey                   |   |   |   | X |
| Turkmenistan |          |                                                |   |   |   |   |
|              | (TKM-01) | 1981-82, 1985-06 Vital Registration            | X |   |   |   |
|              | (TKM-02) | 2000 Standard Demographic and Health Survey    |   |   | X | X |
| Uganda       |          |                                                |   |   |   |   |
|              | (UGA-01) | 1969 Census                                    |   |   |   | X |
|              | (UGA-02) | 1988-89 Standard Demographic and Health Survey |   |   | X | X |
|              | (UGA-03) | 1991 Census                                    |   |   |   | X |
|              | (UGA-04) | 1992 National Integrated Household Survey      |   |   |   | X |
|              | (UGA-05) | 1995 Standard Demographic and Health Survey    |   |   | X | X |
|              | (UGA-06) | 2000-01 Standard Demographic and Health Survey |   |   | X | X |
|              | (UGA-07) | 2002 Census                                    |   | X |   | X |
|              | (UGA-08) | 2004 AIDS Indicator Survey                     |   |   |   | X |
|              | (UGA-09) | 2006 Standard Demographic and Health Survey    |   |   | X | X |
|              | (UGA-10) | 2009-10 Malaria Indicator Survey               |   |   | X | X |
|              | (UGA-11) | 2011 AIDS Indicator Survey                     |   |   |   | X |
|              | (UGA-12) | 2011 Standard Demographic and Health Survey    |   |   | X | X |
| Ukraine      |          |                                                |   |   |   |   |
|              | (UKR-01) | 1959-12 Vital Registration                     | X |   |   |   |
|              | (UKR-02) | 1989 Census                                    |   |   |   | X |
|              | (UKR-03) | 1999 Reproductive Health Survey                |   |   | X |   |
|              | (UKR-04) | 2001 Census                                    |   |   |   | X |

|                      |          |                                                                            |   |   |   |   |
|----------------------|----------|----------------------------------------------------------------------------|---|---|---|---|
|                      | (UKR-05) | 2005 Multiple Indicator Cluster Survey                                     |   |   |   | x |
|                      | (UKR-06) | 2007 Standard Demographic and Health Survey                                |   |   | x | x |
|                      | (UKR-07) | 2012 Multiple Indicator Cluster Survey                                     |   |   |   | x |
| United Arab Emirates |          |                                                                            |   |   |   |   |
|                      | (ARE-01) | 1975 Census                                                                |   |   |   | x |
|                      | (ARE-02) | 1980 Census                                                                |   |   |   | x |
|                      | (ARE-03) | 1987-88 Child Health Survey                                                |   |   |   | x |
|                      | (ARE-04) | 1995 Gulf Family Health Survey                                             |   |   | x |   |
|                      | (ARE-05) | 1998 United Arab Emirates Ministry of Planning Survey (Ministry of Health) |   | x |   |   |
|                      | (ARE-06) | 2004 United Arab Emirates Ministry of Planning Survey (Ministry of Health) |   | x |   |   |
|                      | (ARE-07) | 2004 Vital Registration                                                    | x |   |   |   |
|                      | (ARE-08) | 2006 United Arab Emirates Ministry of Planning Survey (Ministry of Health) |   | x |   |   |
| United Kingdom       |          |                                                                            |   |   |   |   |
|                      | (GBR-01) | 1950-11 Vital Registration                                                 | x |   |   |   |
| United States        |          |                                                                            |   |   |   |   |
|                      | (USA-01) | 1950-10 Vital Registration                                                 | x |   |   |   |
|                      | (USA-02) | 2011 Vital Registration (Report)                                           | x |   |   |   |
| Uruguay              |          |                                                                            |   |   |   |   |
|                      | (URY-01) | 1950-04, 2007-09 Vital Registration                                        | x |   |   |   |
|                      | (URY-02) | 1975 Census                                                                |   |   |   | x |
|                      | (URY-03) | 1985 Census                                                                |   |   |   | x |
|                      | (URY-04) | 1996 Census                                                                |   |   |   | x |
|                      | (URY-05) | 2011 Census                                                                |   |   |   | x |
| Uzbekistan           |          |                                                                            |   |   |   |   |
|                      | (UZB-01) | 1981-82, 1985-06 Vital Registration                                        | x |   |   |   |
|                      | (UZB-02) | 1996 Standard Demographic and Health Survey                                |   |   | x | x |
|                      | (UZB-03) | 2000 Multiple Indicator Cluster Survey                                     |   |   |   | x |
|                      | (UZB-04) | 2002 Special Demographic and Health Survey                                 |   |   | x | x |
|                      | (UZB-05) | 2006 Multiple Indicator Cluster Survey                                     |   |   |   | x |
| Vanuatu              |          |                                                                            |   |   |   |   |
|                      | (VUT-01) | 1967 Census                                                                |   |   |   | x |
|                      | (VUT-02) | 1989 Census                                                                |   | x |   | x |
|                      | (VUT-03) | 1999 Census                                                                |   | x |   |   |
|                      | (VUT-04) | 2007-08 Multiple Indicator Cluster Survey                                  |   |   |   | x |
|                      | (VUT-05) | 2009 Census                                                                |   |   |   | x |
| Venezuela            |          |                                                                            |   |   |   |   |
|                      | (VEN-01) | 1950-94, 1996-11 Vital Registration                                        | x |   |   |   |
|                      | (VEN-02) | 1977 World Fertility Survey                                                |   |   |   | x |
|                      | (VEN-03) | 1981 Census                                                                |   |   |   | x |
|                      | (VEN-04) | 1990 Census                                                                |   |   |   | x |
|                      | (VEN-05) | 1998 National Population and Family Survey                                 |   | x |   |   |
|                      | (VEN-06) | 2001 Census                                                                |   |   |   | x |
| Vietnam              |          |                                                                            |   |   |   |   |
|                      | (VNM-01) | 1989 Census                                                                |   | x |   | x |

|          |          |                                                            |   |   |   |   |
|----------|----------|------------------------------------------------------------|---|---|---|---|
|          | (VNM-02) | 1994 Intercensal Demographic Survey                        |   |   |   | x |
|          | (VNM-03) | 1997 Standard Demographic and Health Survey                |   |   | x | x |
|          | (VNM-04) | 1999 Census                                                | x | x |   | x |
|          | (VNM-05) | 2000 Multiple Indicator Cluster Survey                     |   |   |   | x |
|          | (VNM-06) | 2002 Standard Demographic and Health Survey                |   |   | x | x |
|          | (VNM-07) | 2005 AIDS Indicator Survey                                 |   |   |   | x |
|          | (VNM-08) | 2006 Multiple Indicator Cluster Survey                     |   |   |   | x |
|          | (VNM-09) | 2006 Population Change and Family Planning Survey          | x |   |   |   |
|          | (VNM-10) | 2007 Population Change and Family Planning Survey          |   |   |   | x |
|          | (VNM-11) | 2008 Health Statistics Yearbook                            | x |   |   |   |
|          | (VNM-12) | 2008 Population Change and Family Planning Survey          |   |   |   | x |
|          | (VNM-13) | 2009 Census                                                |   |   |   | x |
|          | (VNM-14) | 2010 Multiple Indicator Cluster Survey                     |   |   |   | x |
|          | (VNM-15) | 2010 Population Change and Family Planning Survey (Report) |   |   |   | x |
|          | (VNM-16) | 2011 Population Change and Family Planning Survey (Report) |   |   |   | x |
| Yemen    |          |                                                            |   |   |   |   |
|          | (YEM-01) | 1979 World Fertility Survey                                |   |   | x | x |
|          | (YEM-02) | 1991-92 Standard Demographic and Health Survey             |   |   | x | x |
|          | (YEM-03) | 1994 Census                                                |   |   |   | x |
|          | (YEM-04) | 1997 Standard Demographic and Health Survey (Report)       |   |   | x |   |
|          | (YEM-05) | 2003 Pan Arab Project for Family Health                    |   |   | x | x |
|          | (YEM-06) | 2006 Multiple Indicator Cluster Survey                     |   |   | x | x |
|          | (YEM-07) | 2006 Yemen Annual Statistical Report                       | x |   |   |   |
| Zambia   |          |                                                            |   |   |   |   |
|          | (ZMB-01) | 1969 Census                                                |   |   |   | x |
|          | (ZMB-02) | 1974 Sample Census of Population                           |   |   |   | x |
|          | (ZMB-03) | 1980 Census                                                |   |   |   | x |
|          | (ZMB-04) | 1990 Census                                                |   |   |   | x |
|          | (ZMB-05) | 1992 Standard Demographic and Health Survey                |   |   | x | x |
|          | (ZMB-06) | 1996-97 Standard Demographic and Health Survey             |   |   | x | x |
|          | (ZMB-07) | 1998 Living Conditions Monitoring Survey                   | x |   |   |   |
|          | (ZMB-08) | 2000 Census                                                |   |   |   | x |
|          | (ZMB-09) | 2001-02 Standard Demographic and Health Survey             |   |   | x | x |
|          | (ZMB-10) | 2005 Sexual Behavior Survey                                | x |   |   |   |
|          | (ZMB-11) | 2006 Living Conditions Monitoring Survey                   | x |   |   |   |
|          | (ZMB-12) | 2007 Household Health Coverage Survey                      | x |   |   |   |
|          | (ZMB-13) | 2007 Standard Demographic and Health Survey                |   |   | x | x |
|          | (ZMB-14) | 2009 Sexual Behavior Survey                                | x |   |   |   |
|          | (ZMB-15) | 2010 Living Conditions Monitoring Survey                   | x |   |   |   |
|          | (ZMB-16) | 2012 Malaria Indicator Survey                              |   |   |   | x |
| Zimbabwe |          |                                                            |   |   |   |   |
|          | (ZWE-01) | 1969 Census                                                |   |   |   | x |
|          | (ZWE-02) | 1982 Census                                                |   |   |   | x |
|          | (ZWE-03) | 1988-89 Standard Demographic and Health Survey             |   |   | x | x |
|          | (ZWE-04) | 1990, 1995 Vital Registration                              | x |   |   |   |

|          |                                                |  |   |   |   |
|----------|------------------------------------------------|--|---|---|---|
| (ZWE-05) | 1992 Census                                    |  |   |   | x |
| (ZWE-06) | 1994 Standard Demographic and Health Survey    |  |   | x | x |
| (ZWE-07) | 1997 Intercensal Demographic Survey            |  | x |   |   |
| (ZWE-08) | 1999 Standard Demographic and Health Survey    |  |   | x | x |
| (ZWE-09) | 2002 Census                                    |  | x |   | x |
| (ZWE-10) | 2005-06 Standard Demographic and Health Survey |  |   | x | x |
| (ZWE-11) | 2009 Multiple Indicator Cluster Survey         |  |   | x | x |
| (ZWE-12) | 2010-11 Standard Demographic and Health Survey |  |   | x | x |
| (ZWE-13) | 2012 Census                                    |  |   |   | x |

**Web table 5. Shapley decomposition analysis of the change in the number of deaths comparing 2013 to 1990 related to changes in income per capita, maternal education, HIV child death rate, births, secular trend, and unexplained factors for 188 GBD countries.**

**Web Table 5. Shapley decomposition analysis of the change in the number of deaths comparing 2013 to 1990 related to changes in income per capita, maternal education, HIV child death rate, births, secular trend, and unexplained factors for 188 GBD countries**

| Changes in under-5 deaths (thousands) |              |                     |                         |                           |                     |                         |                           |                           |                              |
|---------------------------------------|--------------|---------------------|-------------------------|---------------------------|---------------------|-------------------------|---------------------------|---------------------------|------------------------------|
| Region                                |              | Fertility           | Maternal Education      | HIV/AIDS                  | Income              | Unexplained             | Secular Trend             | Total                     |                              |
| Asia Pacific, High-income             | Brunei       | 0<br>(0,0)          | 0<br>(0,0)              | 0<br>(0,0)                | 0<br>(0,0)          | 0<br>(0,0)              | 0<br>(0,0)                | 0<br>(0,0)                |                              |
|                                       | Japan        | -1<br>(-1,-1)       | --8<br>(--8,--7)        | 0<br>(0,0)                | --2<br>(--3,--2)    | ·4<br>(0,·8)            | -3<br>(-3·4,-2·6)         | -4·6<br>(-4·6,-4·6)       |                              |
|                                       | Singapore    | --1<br>(-1,--1)     | 0<br>(0,0)              | 0<br>(0,0)                | 0<br>(0,0)          | --1<br>(-1,0)           | --1<br>(-1,--1)           | --3<br>(-3,--3)           |                              |
|                                       | South Korea  | -1·3<br>(-1·3,-1·2) | --8<br>(--9,--8)        | 0<br>(0,0)                | --6<br>(-7,--6)     | ·2<br>(0,·5)            | -2·1<br>(-2·4,-1·8)       | -4·6<br>(-4·6,-4·6)       |                              |
|                                       | Armenia      | -1<br>(-1,-1)       | --3<br>(-4,--3)         | 0<br>(0,0)                | --2<br>(-2,--1)     | --1<br>(-2,·1)          | -1·2<br>(-1·4,-1·1)       | -2·8<br>(-2·9,-2·8)       |                              |
| Asia, Central                         | Azerbaijan   | -1·7<br>(-1·8,-1·7) | -2·4<br>(-2·6,-2·2)     | 0<br>(0,0)                | -1<br>(-1,-9)       | 2·6<br>(1·8,3·5)        | -7·2<br>(-8·1,-6·4)       | -9·7<br>(-9·8,-9·6)       |                              |
|                                       | Georgia      | -1<br>(-1,-1)       | --3<br>(-4,--3)         | 0<br>(0,0)                | ·1<br>(·1,·1)       | ·4<br>(·2,·6)           | -1·6<br>(-1·8,-1·4)       | -2·5<br>(-2·5,-2·4)       |                              |
|                                       | Kazakhstan   | -1·3<br>(-1·3,-1·2) | -2·4<br>(-2·6,-2·2)     | 0<br>(0,0)                | --9<br>(-1,-8)      | 5·1<br>(4·2,6·2)        | -8·2<br>(-9·3,-7·3)       | -7·6<br>(-7·7,-7·5)       |                              |
|                                       | Kyrgyzstan   | ·7<br>(·7,·7)       | -1·3<br>(-1·4,-1·2)     | 0<br>(0,0)                | ·2<br>(·2,·3)       | --1<br>(-6,·5)          | -4·9<br>(-5·5,-4·4)       | -5·3<br>(-5·4,-5·3)       |                              |
|                                       | Mongolia     | --4<br>(-4,--3)     | --7<br>(-8,--7)         | 0<br>(0,0)                | --3<br>(-4,--3)     | ·7<br>(-3,1·1)          | -3·2<br>(-3·6,-2·9)       | -4<br>(-4,-3·9)           |                              |
|                                       | Tajikistan   | 4<br>(3·9,4·1)      | -3·6<br>(-3·9,-3·3)     | 0<br>(0,0)                | 1·4<br>(1·3,1·5)    | ·6<br>(-6,2)            | -11·3<br>(-12·7,-10·1)    | -8·8<br>(-8·8,-8·8)       |                              |
|                                       | Turkmenistan | -1·4<br>(-1·5,-1·4) | -2·1<br>(-2·3,-1·9)     | 0<br>(0,0)                | --4<br>(-5,--4)     | 3·4<br>(2·6,4·2)        | -6·6<br>(-7·4,-5·9)       | -7·2<br>(-7·3,-7·1)       |                              |
|                                       | Uzbekistan   | -4·1<br>(-4·2,-4)   | -6·8<br>(-7·3,-6·2)     | 0<br>(0,0)                | -1·7<br>(-1·8,-1·5) | 17·6<br>(14·8,20·6)     | -22·9<br>(-26,-20·3)      | -17·9<br>(-18·2,-17·6)    |                              |
|                                       | Asia, East   | China               | -238·2<br>(-239,-237·5) | -190·3<br>(-205·6,-175·6) | ·3<br>(·3,·3)       | -213·1<br>(-232,-193·9) | -313·6<br>(-364·3,-260·3) | -285·4<br>(-339·6,-232·5) | -1240·3<br>(-1241·9,-1238·9) |
|                                       |              | North Korea         | -2·3<br>(-2·3,-2·2)     | -4·4<br>(-4·8,-4·1)       | 0<br>(0,0)          | 1·5<br>(1·4,1·7)        | -4·1<br>(-5·3,-3)         | -5·9<br>(-7·1,-4·8)       | -15·2<br>(-15·2,-15·2)       |
| Taiwan                                |              | -1·7                | --7                     | 0                         | --3                 | 1·3                     | --8                       | -2·2                      |                              |

|                 |                     |                        |                           |                     |                           |                         |                             |                           |
|-----------------|---------------------|------------------------|---------------------------|---------------------|---------------------------|-------------------------|-----------------------------|---------------------------|
|                 | (Province of China) | (-1.7,-1.7)            | (-.7,-.6)                 | (0.0)               | (-.4,-.3)                 | (1.1,1.5)               | (-1,-.7)                    | (-2.3,-2.2)               |
| Asia, South     | Afghanistan         | 52.2<br>(51.4,53.2)    | -5.7<br>(-6.2,-5.3)       | 0<br>(0.0)          | 2.1<br>(1.9,2.3)          | 8.7<br>(-1.6,19.4)      | -71.7<br>(-82.2,-61.2)      | -14.3<br>(-15,-13.4)      |
|                 | Bangladesh          | -49.6<br>(-50.6,-49.2) | -73.5<br>(-79.4,-67.4)    | 0<br>(0.0)          | -31.8<br>(-34.7,-28.9)    | -68.4<br>(-118.1,-18.8) | -146.6<br>(-195.2,-97.9)    | -369.9<br>(-372.9,-368.7) |
|                 | Bhutan              | -.4<br>(-.4,-.4)       | -.4<br>(-.4,-.3)          | 0<br>(0.0)          | -.3<br>(-.3,-.3)          | 0<br>(-.3,.2)           | -.8<br>(-1.1,-.5)           | -1.9<br>(-1.9,-1.9)       |
|                 | India               | -85.4<br>(-89.2,-82.7) | -610<br>(-664.5,-555.2)   | -8.2<br>(-8.9,-7.5) | -335.7<br>(-371.2,-303.5) | 342.3<br>(-53.3,748.1)  | -1117.1<br>(-1513.7,-730.9) | -1814<br>(-1855,-1786.2)  |
|                 | Nepal               | -8.3<br>(-8.4,-8.2)    | -15.1<br>(-16.3,-13.9)    | 0<br>(0.0)          | -4.1<br>(-4.5,-3.7)       | -19.9<br>(-28.9,-11)    | -27.1<br>(-35.9,-18.2)      | -74.4<br>(-74.8,-74.3)    |
|                 | Pakistan            | 13<br>(12.3,13.9)      | -121.5<br>(-133.5,-110.3) | -.2<br>(-.2,.3)     | -35.4<br>(-39.2,-31.8)    | 229.4<br>(141.1,321.8)  | -244.8<br>(-336.2,-157.3)   | -159<br>(-166.8,-152.8)   |
| Asia, Southeast | Cambodia            | -.2<br>(-.2,.3)        | -7<br>(-7.6,-6.4)         | 0<br>(0.0)          | -5<br>(-5.4,-4.5)         | -3.7<br>(-5.9,-1.4)     | -12.1<br>(-14.5,-9.8)       | -27.5<br>(-27.6,-27.4)    |
|                 | Indonesia           | 3.6<br>(3.6,3.6)       | -78.4<br>(-84.8,-72.4)    | -.5<br>(-.4,.5)     | -31.6<br>(-34.4,-28.7)    | -32.8<br>(-52.7,-13.2)  | -107.5<br>(-128.7,-87)      | -246.2<br>(-247,-245.7)   |
|                 | Laos                | -.2<br>(-.2,-.2)       | -3.9<br>(-4.2,-3.6)       | 0<br>(0.0)          | -.3<br>(-.3,-.2.7)        | -2.6<br>(-4,-1.1)       | -7.9<br>(-9.5,-6.4)         | -17.5<br>(-17.6,-17.5)    |
|                 | Malaysia            | -.1<br>(-.1,.1)        | -2.1<br>(-2.2,-1.9)       | 0<br>(0.0)          | -.8<br>(-.8,-.7)          | -.1<br>(-.5,.4)         | -2.4<br>(-2.9,-1.9)         | -5.2<br>(-5.2,-5.2)       |
|                 | Maldives            | 0<br>(0.0)             | 0<br>(-.1,0)              | 0<br>(0.0)          | -.1<br>(-.1,0)            | -.2<br>(-.2,-.2)        | -.1<br>(-.2,-.1)            | -.5<br>(-.5,-.5)          |
|                 | Myanmar             | -14<br>(-14.1,-13.9)   | -19.2<br>(-20.8,-17.7)    | 0<br>(0.0)          | -14.1<br>(-15.3,-12.8)    | -8.4<br>(-13.6,-3.1)    | -28.6<br>(-34.3,-23.2)      | -84.3<br>(-84.6,-84.1)    |
|                 | Philippines         | 14.2<br>(14.1,14.3)    | -15.4<br>(-16.7,-14.3)    | -.1<br>(-.1,.1)     | -5<br>(-5.4,-4.5)         | -1.4<br>(-8.3,5.6)      | -37.2<br>(-44.6,-30)        | -44.8<br>(-44.8,-44.7)    |
|                 | Sri Lanka           | -.4<br>(-.4,.4)        | -2.1<br>(-2.2,-1.9)       | 0<br>(0.0)          | -.1<br>(-1.1,-.9)         | -3.6<br>(-4.1,-3.1)     | -3<br>(-3.6,-2.4)           | -9.2<br>(-9.3,-9.2)       |
|                 | Thailand            | -7.6<br>(-7.6,-7.6)    | -4.3<br>(-4.7,-4)         | 0<br>(-.1,0)        | -2.5<br>(-2.7,-2.3)       | -3.4<br>(-4.7,-2.1)     | -7.3<br>(-8.7,-5.9)         | -25.1<br>(-25.2,-25)      |
|                 | Timor-Leste         | -.7<br>(-.7,.7)        | -1.3<br>(-1.4,-1.2)       | 0<br>(0.0)          | -.3<br>(-.3,-.2)          | -1.2<br>(-1.5,-1)       | -1.3<br>(-1.5,-1)           | -3.4<br>(-3.4,-3.4)       |
|                 | Vietnam             | -17.2<br>(-17.3,-17.1) | -8.5<br>(-9.2,-7.8)       | 0<br>(0.0)          | -10.4<br>(-11.4,-9.5)     | -7.6<br>(-11.8,-3.4)    | -22.4<br>(-26.8,-18.1)      | -66.1<br>(-66.3,-65.9)    |
| Australasia     | Australia           | -.4<br>(-.4,.4)        | -.2<br>(-.2,-.2)          | 0<br>(0.0)          | -.1<br>(-.2,-.1)          | 0<br>(-.1,.2)           | -1.1<br>(-1.2,-1)           | -1.1<br>(-1.1,-1.1)       |
|                 | New Zealand         | 0<br>(0.0)             | -.1<br>(-.1,-.1)          | 0<br>(0.0)          | 0<br>(0.0)                | -.1<br>(0,.1)           | -.3<br>(-.3,-.3)            | -.3<br>(-.3,-.3)          |
| Caribbean       | Antigua and Barbuda | 0<br>(0.0)             | 0<br>(0.0)                | 0<br>(0.0)          | 0<br>(0.0)                | 0<br>(0.0)              | 0<br>(0.0)                  | 0<br>(0.0)                |

|                 |                                  |             |             |             |           |           |              |               |
|-----------------|----------------------------------|-------------|-------------|-------------|-----------|-----------|--------------|---------------|
|                 | Barbados                         | 0           | 0           | 0           | 0         | 0         | 0            | --1           |
|                 |                                  | (0,0)       | (0,0)       | (0,0)       | (0,0)     | (0,0)     | (0,0)        | (-1,-1)       |
|                 | Belize                           | 0           | 0           | 0           | 0         | 0         | --1          | --1           |
|                 |                                  | (0,0)       | (0,0)       | (0,0)       | (0,0)     | (0,0)     | (-1,-1)      | (-1,-1)       |
|                 | Cuba                             | --6         | --4         | 0           | --1       | --2       | --5          | -1.8          |
|                 |                                  | (-6,-6)     | (-4,-3)     | (0,0)       | (-1,-1)   | (-3,-1)   | (-6,-4)      | (-1.8,-1.8)   |
|                 | Dominica                         | 0           | 0           | 0           | 0         | 0         | 0            | 0             |
|                 |                                  | (0,0)       | (0,0)       | (0,0)       | (0,0)     | (0,0)     | (0,0)        | (0,0)         |
|                 | Dominican Republic               | 0           | -2.9        | 0           | -1.1      | 1.2       | -3.7         | -6.5          |
|                 |                                  | (0,0)       | (-3.1,-2.7) | (0,0)       | (-1.2,-1) | (.5,1.9)  | (-4.4,-2.9)  | (-6.5,-6.4)   |
|                 | Grenada                          | 0           | 0           | 0           | 0         | 0         | 0            | -1            |
|                 |                                  | (0,0)       | (0,0)       | (0,0)       | (0,0)     | (0,0)     | (0,0)        | (-1,-1)       |
|                 | Guyana                           | 0           | --2         | 0           | --1       | .4        | --3          | --3           |
|                 |                                  | (0,0)       | (-3,-2)     | (0,0)       | (-1,-1)   | (.3,.4)   | (-4,-2)      | (-3,-3)       |
|                 | Haiti                            | 0           | -8.3        | -1.6        | -.9       | -1.4      | -10.8        | -21.3         |
|                 |                                  | (0,0)       | (-9,-7.7)   | (-1.8,-1.5) | (.8,.9)   | (-3.4,.7) | (-12.9,-8.6) | (-21.4,-21.2) |
|                 | Jamaica                          | --3         | --3         | 0           | 0         | .2        | --5          | --9           |
|                 |                                  | (-3,-3)     | (-3,-3)     | (0,0)       | (0,0)     | (.1,.3)   | (-6,-4)      | (-9,-9)       |
|                 | Saint Lucia                      | 0           | 0           | 0           | 0         | 0         | 0            | -1            |
|                 |                                  | (0,0)       | (0,0)       | (0,0)       | (0,0)     | (0,0)     | (0,0)        | (-1,-1)       |
|                 | Saint Vincent and the Grenadines | 0           | 0           | 0           | 0         | 0         | 0            | -1            |
|                 |                                  | (0,0)       | (0,0)       | (0,0)       | (0,0)     | (0,0)     | (0,0)        | (-1,-1)       |
|                 | Suriname                         | 0           | --1         | 0           | 0         | .2        | --2          | --1           |
|                 |                                  | (0,0)       | (-1,-1)     | (0,0)       | (0,0)     | (.1,.2)   | (-2,-1)      | (-1,-1)       |
|                 | The Bahamas                      | 0           | 0           | 0           | 0         | 0         | -1           | -1            |
|                 |                                  | (0,0)       | (0,0)       | (0,0)       | (0,0)     | (0,0)     | (-1,0)       | (-1,-1)       |
|                 | Trinidad and Tobago              | --2         | --1         | 0           | --1       | .3        | --2          | --3           |
|                 |                                  | (-2,-2)     | (-1,-1)     | (0,0)       | (-1,-1)   | (.3,.4)   | (-3,-2)      | (-3,-3)       |
| Europe, Central | Albania                          | -1.3        | --4         | 0           | --2       | .4        | -1.3         | -2.7          |
|                 |                                  | (-1.3,-1.3) | (-4,-3)     | (0,0)       | (-2,-2)   | (.2,.5)   | (-1.4,-1.1)  | (-2.7,-2.7)   |
|                 | Bosnia and Herzegovina           | --3         | --2         | 0           | --1       | .1        | --4          | --9           |
|                 |                                  | (-3,-3)     | (-2,-2)     | (0,0)       | (-1,-1)   | (0,.1)    | (-4,-3)      | (-9,-9)       |
|                 | Bulgaria                         | --5         | --2         | 0           | --1       | .4        | --9          | -1.2          |
|                 |                                  | (-5,-5)     | (-2,-2)     | (0,0)       | (-1,-1)   | (.3,.5)   | (-1,-.8)     | (-1.3,-1.2)   |
|                 | Croatia                          | --1         | --1         | 0           | 0         | 0         | --3          | --5           |
|                 |                                  | (-1,-1)     | (-1,-1)     | (0,0)       | (0,0)     | (0,.1)    | (-3,-2)      | (-5,-5)       |
|                 | Czech Republic                   | --1         | --1         | 0           | --1       | --4       | --6          | -1.2          |
|                 |                                  | (-1,-1)     | (-1,-1)     | (0,0)       | (-1,-1)   | (-5,-.3)  | (-6,-5)      | (-1.2,-1.2)   |
|                 | Hungary                          | --3         | --2         | 0           | --1       | --3       | --8          | -1.6          |

|            |             |             |       |          |             |             |             |
|------------|-------------|-------------|-------|----------|-------------|-------------|-------------|
|            | (-3,-3)     | (-2,-2)     | (0,0) | (-1,0)   | (-4,-2)     | (-9,-7)     | (-1,6,-1,6) |
| Macedonia  | -2          | -1          | 0     | 0        | -2          | -4          | -1          |
|            | (-2,-2)     | (-1,-1)     | (0,0) | (0,0)    | (-3,-2)     | (-4,-3)     | (-1,-1)     |
| Montenegro | 0           | 0           | 0     | 0        | 0           | -1          | -1          |
|            | (0,0)       | (0,0)       | (0,0) | (0,0)    | (0,0)       | (-1,-1)     | (-1,-1)     |
| Poland     | -1.5        | -5          | 0     | -6       | -1.5        | -3.4        | -7.5        |
|            | (-1.5,-1.4) | (-6,-.5)    | (0,0) | (-6,-.5) | (-1.9,-1.1) | (-3.8,-3.1) | (-7.5,-7.5) |
| Romania    | -2          | -1.2        | 0     | -2       | -7          | -3.9        | -8          |
|            | (-2.1,-2)   | (-1.3,-1.1) | (0,0) | (-3,-.2) | (-1.1,-.2)  | (-4.3,-3.5) | (-8.1,-8)   |
| Serbia     | -6          | -3          | 0     | 0        | -5          | -9          | -2.2        |
|            | (-6,-6)     | (-4,-.3)    | (0,0) | (0,0)    | (-6,-.4)    | (-1,-.8)    | (-2.2,-2.2) |
| Slovakia   | -2          | -2          | 0     | -1       | .2          | -5          | -7          |
|            | (-2,-.2)    | (-2,-.2)    | (0,0) | (-1,-.1) | (.2,.3)     | (-6,-.4)    | (-7,-.7)    |
| Slovenia   | 0           | 0           | 0     | 0        | 0           | -1          | -1          |
|            | (0,0)       | (0,0)       | (0,0) | (0,0)    | (0,0)       | (-1,-.1)    | (-1,-.1)    |

|                    |           |            |             |       |          |          |               |               |
|--------------------|-----------|------------|-------------|-------|----------|----------|---------------|---------------|
| Europe,<br>Eastern | Belarus   | -5         | -2          | 0     | -2       | -1       | -1.1          | -2.1          |
|                    |           | (-5,-.5)   | (-2,-.2)    | (0,0) | (-2,-.2) | (-2,.1)  | (-1.3,-1)     | (-2.1,-2.1)   |
|                    | Estonia   | -1         | 0           | 0     | 0        | -1       | -1            | -3            |
|                    |           | (-1,-.1)   | (0,0)       | (0,0) | (0,0)    | (-1,-.1) | (-1,-.1)      | (-3,-.3)      |
|                    | Latvia    | -2         | 0           | 0     | 0        | 0        | -2            | -5            |
|                    |           | (-2,-.1)   | (0,0)       | (0,0) | (0,0)    | (-1,0)   | (-3,-.2)      | (-5,-.5)      |
|                    | Lithuania | -2         | 0           | 0     | 0        | -1       | -3            | -6            |
|                    |           | (-2,-.2)   | (-1,0)      | (0,0) | (0,0)    | (-1,-.1) | (-3,-.2)      | (-6,-.6)      |
|                    | Moldova   | -8         | -2          | 0     | -1       | 0        | -9            | -1.9          |
|                    |           | (-8,-.8)   | (-3,-.2)    | (0,0) | (-1,.1)  | (-1,.1)  | (-1,-.8)      | (-1.9,-1.9)   |
|                    | Russia    | -5.1       | -5.4        | 0     | -7       | 1.7      | -20.6         | -30           |
|                    |           | (-5.1,-.5) | (-5.8,-.5)  | (0,0) | (-7,-.6) | (-6.4,1) | (-23.1,-18.4) | (-30.2,-29.9) |
|                    | Ukraine   | -3         | -1.2        | 0     | -2       | 1.5      | -6.6          | -9.1          |
|                    |           | (-3,-2.9)  | (-1.3,-1.1) | (0,0) | (-2,.3)  | (.8,2.3) | (-7.4,-5.9)   | (-9.2,-9)     |

|                    |         |          |          |       |        |        |          |          |
|--------------------|---------|----------|----------|-------|--------|--------|----------|----------|
| Europe,<br>Western | Andorra | 0        | 0        | 0     | 0      | 0      | 0        | 0        |
|                    |         | (0,0)    | (0,0)    | (0,0) | (0,0)  | (0,0)  | (0,0)    | (0,0)    |
|                    | Austria | -1       | -1       | 0     | 0      | 0      | -3       | -5       |
|                    |         | (-1,-.1) | (-1,-.1) | (0,0) | (0,0)  | (-1,0) | (-4,-.3) | (-5,-.5) |
|                    | Belgium | -1       | -1       | 0     | -1     | -1     | -5       | -7       |
|                    |         | (-1,.1)  | (-2,-.1) | (0,0) | (-1,0) | (-1,0) | (-6,-.4) | (-7,-.7) |
|                    | Cyprus  | 0        | 0        | 0     | 0      | 0      | 0        | -1       |
|                    |         | (0,0)    | (0,0)    | (0,0) | (0,0)  | (0,0)  | (0,0)    | (-1,-.1) |
|                    | Denmark | 0        | 0        | 0     | 0      | -1     | -2       | -3       |
|                    |         | (0,0)    | (0,0)    | (0,0) | (0,0)  | (-1,0) | (-3,-.2) | (-3,-.3) |
|                    | Finland | 0        | 0        | 0     | 0      | 0      | -2       | -3       |
|                    |         | (0,0)    | (0,0)    | (0,0) | (0,0)  | (0,0)  | (-2,-.2) | (-3,-.3) |
|                    | France  | -2       | -9       | 0     | -2     | -1     | -2.7     | -3.7     |



|                |  |         |         |       |         |         |              |             |
|----------------|--|---------|---------|-------|---------|---------|--------------|-------------|
|                |  | (-2,-2) | (-1,-8) | (0,0) | (-2,-2) | (-4,2)  | (-3,-2,4)    | (-3,7,-3,7) |
| Germany        |  | -9      | -8      | 0     | -3      | -5      | -2,7         | -5,2        |
|                |  | (-9,-8) | (-9,-7) | (0,0) | (-3,-2) | (-8,-2) | (-3,-1,-2,4) | (-5,2,-5,1) |
| Greece         |  | 0       | -2      | 0     | 0       | 0       | -4           | -7          |
|                |  | (0,0)   | (-2,-2) | (0,0) | (0,0)   | (-1,0)  | (-5,-4)      | (-7,-7)     |
| Iceland        |  | 0       | 0       | 0     | 0       | 0       | 0            | 0           |
|                |  | (0,0)   | (0,0)   | (0,0) | (0,0)   | (0,0)   | (0,0)        | (0,0)       |
| Ireland        |  | -1      | -1      | 0     | -1      | -1      | -2           | -2          |
|                |  | (-1,-1) | (-1,-1) | (0,0) | (-1,-1) | (0,1)   | (-3,-2)      | (-2,-2)     |
| Israel         |  | -4      | -2      | 0     | -1      | -2      | -6           | -6          |
|                |  | (-4,-4) | (-2,-2) | (0,0) | (-1,-1) | (-3,-1) | (-6,-5)      | (-6,-6)     |
| Italy          |  | 0       | -6      | 0     | -1      | -5      | -2           | -3,2        |
|                |  | (0,0)   | (-6,-5) | (0,0) | (-1,-1) | (-8,-3) | (-2,3,-1,8)  | (-3,2,-3,2) |
| Luxembourg     |  | 0       | 0       | 0     | 0       | 0       | 0            | 0           |
|                |  | (0,0)   | (0,0)   | (0,0) | (0,0)   | (0,0)   | (0,0)        | (0,0)       |
| Malta          |  | 0       | 0       | 0     | 0       | 0       | 0            | 0           |
|                |  | (0,0)   | (0,0)   | (0,0) | (0,0)   | (0,0)   | (0,0)        | (0,0)       |
| Netherlands    |  | -1      | -2      | 0     | -1      | -1      | -7           | -1          |
|                |  | (-1,-1) | (-2,-2) | (0,0) | (-1,-1) | (0,2)   | (-8,-6)      | (-1,-1)     |
| Norway         |  | 0       | -1      | 0     | 0       | -1      | -2           | -3          |
|                |  | (0,0)   | (-1,-1) | (0,0) | (0,0)   | (-1,-1) | (-2,-2)      | (-3,-3)     |
| Portugal       |  | -2      | -2      | 0     | -1      | -4      | -5           | -1,3        |
|                |  | (-2,-2) | (-3,-2) | (0,0) | (-1,0)  | (-4,-3) | (-5,-4)      | (-1,3,-1,3) |
| Spain          |  | -6      | -8      | 0     | -2      | 0       | -1,6         | -2          |
|                |  | (-6,-6) | (-9,-8) | (0,0) | (-2,-2) | (-1,2)  | (-1,8,-1,4)  | (-2,-2)     |
| Sweden         |  | 0       | -1      | 0     | 0       | -1      | -3           | -5          |
|                |  | (0,0)   | (-1,-1) | (0,0) | (0,0)   | (-2,-1) | (-4,-3)      | (-5,-5)     |
| Switzerland    |  | 0       | 0       | 0     | 0       | 0       | -3           | -3          |
|                |  | (0,0)   | (0,0)   | (0,0) | (0,0)   | (0,1)   | (-3,-3)      | (-3,-3)     |
| United Kingdom |  | 0       | -8      | 0     | -4      | -8      | -3,2         | -3,7        |
|                |  | (0,0)   | (-9,-7) | (0,0) | (-5,-4) | (5,1,3) | (-3,7,-2,8)  | (-3,7,-3,6) |

Latin America, Andean

|         |  |             |             |       |             |              |              |               |
|---------|--|-------------|-------------|-------|-------------|--------------|--------------|---------------|
| Bolivia |  | 1,8         | -5,7        | 0     | -1          | -3,4         | -7,4         | -15,8         |
|         |  | (1,7,1,8)   | (-6,2,-5,3) | (0,0) | (-1,1,-9)   | (-4,8,-2,1)  | (-8,8,-5,9)  | (-15,8,-15,8) |
| Ecuador |  | 1           | -3,1        | 0     | -7          | -6           | -5,1         | -7,3          |
|         |  | (1,1)       | (-3,3,-2,9) | (0,0) | (-8,-6)     | (-3,1,6)     | (-6,2,-4,1)  | (-7,3,-7,3)   |
| Peru    |  | -2,2        | -7,6        | 0     | -2,1        | -11,8        | -10,7        | -34,4         |
|         |  | (-2,2,-2,2) | (-8,2,-7)   | (0,0) | (-2,3,-1,9) | (-13,7,-9,9) | (-12,7,-8,6) | (-34,4,-34,4) |

Latin America, Central

|            |  |       |             |       |             |            |            |               |
|------------|--|-------|-------------|-------|-------------|------------|------------|---------------|
| Colombia   |  | 0     | -3,9        | 0     | -1,6        | -1         | -9,2       | -14,6         |
|            |  | (0,0) | (-4,2,-3,6) | (0,0) | (-1,7,-1,4) | (-1,6,1,9) | (-11,-7,3) | (-14,6,-14,6) |
| Costa Rica |  | -1    | -3          | 0     | -1          | 0          | -5         | -1            |

|                          |             |               |               |         |             |               |               |                 |
|--------------------------|-------------|---------------|---------------|---------|-------------|---------------|---------------|-----------------|
|                          |             | (-1,-1)       | (-3,-3)       | (0,0)   | (-1,-1)     | (-1,1)        | (-6,-4)       | (-1,-1)         |
|                          | El Salvador | -1.2          | -1.2          | 0       | -4          | -2.6          | -1.7          | -7.2            |
|                          |             | (-1.3,-1.2)   | (-1.3,-1.1)   | (0,0)   | (-4,-3)     | (-2.9,-2.3)   | (-2,-1.4)     | (-7.2,-7.1)     |
|                          | Guatemala   | 6.3           | -4.5          | 0       | -9          | -6.3          | -8            | -13.3           |
|                          |             | (6.3,6.3)     | (-4.8,-4.1)   | (0,0)   | (-9,-8)     | (-7.8,-4.9)   | (-9.4,-6.4)   | (-13.3,-13.3)   |
|                          | Honduras    | .7            | -2            | -1      | -3          | -9            | -2.9          | -5.4            |
|                          |             | (.7,.8)       | (-2.1,-1.8)   | (-1,-1) | (-3,-3)     | (-1.4,-.3)    | (-3.5,-2.3)   | (-5.4,-5.4)     |
|                          | Mexico      | -5.2          | -18.5         | 0       | -2.9        | -12.6         | -26           | -65.2           |
|                          |             | (-5.2,-5.2)   | (-20,-17.1)   | (0,0)   | (-3.1,-2.6) | (-17.3,-7.7)  | (-31,-20.9)   | (-65.3,-65.1)   |
|                          | Nicaragua   | -6            | -1.3          | 0       | -1          | -2.3          | -2.4          | -6.8            |
|                          |             | (-6,-6)       | (-1.4,-1.2)   | (0,0)   | (-1,0)      | (-2.8,-1.9)   | (-2.9,-2)     | (-6.8,-6.8)     |
|                          | Panama      | .2            | -4            | 0       | -2          | .6            | -7            | -4              |
|                          |             | (.2,.2)       | (-4,-4)       | (0,0)   | (-2,-2)     | (.5,.7)       | (-8,-.5)      | (-4,-4)         |
|                          | Venezuela   | .7            | -3.3          | 0       | -2          | -1.2          | -4.8          | -8.8            |
|                          |             | (.7,.7)       | (-3.6,-3.1)   | (0,0)   | (-3,-2)     | (-2.1,-.3)    | (-5.7,-3.8)   | (-8.8,-8.8)     |
| Latin America, Southern  | Argentina   | -3            | -3.4          | 0       | -1.3        | 3.2           | -8.7          | -10.5           |
|                          |             | (-3,-3)       | (-3.6,-3.1)   | (0,0)   | (-1.5,-1.2) | (2.2,4.3)     | (-9.8,-7.6)   | (-10.6,-10.4)   |
|                          | Chile       | -8            | -8            | 0       | -5          | .2            | -2            | -3.9            |
|                          |             | (-8,-7)       | (-9,-.8)      | (0,0)   | (-6,-.5)    | (-1,.4)       | (-2.3,-1.8)   | (-4,-3.9)       |
|                          | Uruguay     | -1            | -2            | 0       | -1          | .1            | -5            | -8              |
|                          |             | (-1,-1)       | (-2,-2)       | (0,0)   | (-1,-1)     | (.1,.2)       | (-6,-.5)      | (-8,-.8)        |
| Latin America, Tropical  | Brazil      | -20           | -29.8         | -2      | -5.1        | -34.8         | -42.4         | -132.2          |
|                          |             | (-20,-19.9)   | (-32.2,-27.4) | (-2,-2) | (-5.6,-4.6) | (-42.4,-27)   | (-50.4,-34.1) | (-132.4,-132.1) |
|                          | Paraguay    | .6            | -1.2          | 0       | -1          | .5            | -1.8          | -2              |
|                          |             | (.6,.6)       | (-1.3,-1.1)   | (0,0)   | (-1,-1)     | (.2,.9)       | (-2.1,-1.4)   | (-2,-2)         |
| North Africa/Middle East | Algeria     | 4.3           | -11.6         | 0       | -1          | 5.4           | -23.7         | -26.7           |
|                          |             | (4.2,4.4)     | (-12.6,-10.7) | (0,0)   | (-1.1,-.9)  | (1.9,8.8)     | (-27.2,-20.3) | (-26.8,-26.5)   |
|                          | Bahrain     | .1            | -1            | 0       | 0           | 0             | -1            | -2              |
|                          |             | (.1,.1)       | (-1,-.1)      | (0,0)   | (0,0)       | (0,0)         | (-2,-.1)      | (-2,-.2)        |
|                          | Egypt       | 7.4           | -27.2         | 0       | -8.2        | -20.5         | -54.5         | -103.1          |
|                          |             | (7.3,7.4)     | (-29.4,-25.1) | (0,0)   | (-9,-7.5)   | (-28.1,-13.2) | (-62.1,-46.9) | (-103.4,-102.8) |
|                          | Iran        | -15.8         | -24           | 0       | -5.7        | -18.2         | -44           | -107.6          |
|                          |             | (-15.9,-15.6) | (-25.9,-22.1) | (0,0)   | (-6.2,-5.2) | (-24.3,-12.4) | (-50.1,-37.9) | (-108,-107.2)   |
|                          | Iraq        | 16.1          | -6.7          | 0       | .8          | 8.3           | -23.3         | -4.8            |
|                          |             | (15.8,16.5)   | (-7.3,-6.2)   | (0,0)   | (.8,.9)     | (4.8,11.8)    | (-26.8,-19.9) | (-5,-4.5)       |
|                          | Jordan      | 2             | -1.6          | 0       | -2          | 2             | -2.8          | -4              |
|                          |             | (2,2.1)       | (-1.7,-1.4)   | (0,0)   | (-2,-.2)    | (1.6,2.5)     | (-3.2,-2.4)   | (-5,-.4)        |
|                          | Kuwait      | .4            | -2            | 0       | -1          | .2            | -5            | -1              |
|                          |             | (.4,.4)       | (-2,-.2)      | (0,0)   | (-1,0)      | (.2,.3)       | (-5,-.4)      | (-1,-.1)        |

|                            |                                |             |               |         |              |              |               |               |
|----------------------------|--------------------------------|-------------|---------------|---------|--------------|--------------|---------------|---------------|
|                            | Lebanon                        | --1         | --5           | 0       | --1          | ·2           | -1            | -1·4          |
|                            |                                | (-1,-1)     | (-5,-4)       | (0,0)   | (-1,-1)      | (·1,·4)      | (-1·1,-·8)    | (-1·4,-1·4)   |
|                            | Libya                          | ·2          | -1·1          | 0       | 0            | --1          | -2·1          | -3·1          |
|                            |                                | (·2,·2)     | (-1·2,-1)     | (0,0)   | (0,0)        | (-·4,·2)     | (-2·4,-1·8)   | (-3·1,-3·1)   |
|                            | Morocco                        | ·4          | -7·6          | 0       | -2·8         | --2          | -22·2         | -32·4         |
|                            |                                | (·4,·4)     | (-8·2,-7)     | (0,0)   | (-3·1,-2·6)  | (-3·3,3)     | (-25·4,-19)   | (-32·6,-32·3) |
|                            | Oman                           | ·1          | --6           | 0       | --1          | --6          | -1            | -2·2          |
|                            |                                | (·1,·1)     | (-·6,-·5)     | (0,0)   | (-1,-1)      | (-8,-·5)     | (-1·1,-·8)    | (-2·2,-2·2)   |
|                            | Palestine                      | 1·2         | -1·3          | 0       | --1          | ·7           | -2·4          | -1·8          |
|                            |                                | (1·2,1·2)   | (-1·4,-1·1)   | (0,0)   | (-1,-1)      | (·4,1·1)     | (-2·7,-2)     | (-1·8,-1·8)   |
|                            | Qatar                          | ·2          | --1           | 0       | 0            | ·1           | --2           | 0             |
|                            |                                | (·2,·2)     | (-·1,-·1)     | (0,0)   | (0,0)        | (0,·1)       | (-2,-2)       | (0,0)         |
|                            | Saudi Arabia                   | --4         | -5·6          | 0       | --2          | -3·2         | -9·3          | -18·6         |
|                            |                                | (-·4,-·4)   | (-6,-5·1)     | (0,0)   | (-2,-2)      | (-4·4,-1·9)  | (-10·6,-8)    | (-18·7,-18·5) |
|                            | Sudan                          | 32·6        | -21·1         | ·2      | -10·9        | 19·3         | -53           | -32·8         |
|                            |                                | (32,33·4)   | (-22·8,-19·3) | (-2,·3) | (-11·9,-9·9) | (11·5,27)    | (-61,-45·2)   | (-32·9,-32·7) |
|                            | Syria                          | 2           | -3·9          | 0       | --7          | -3·2         | -7·4          | -13·2         |
|                            |                                | (2,2)       | (-4·2,-3·6)   | (0,0)   | (-7,-·6)     | (-4·3,-2·2)  | (-8·5,-6·4)   | (-13·3,-13·2) |
|                            | Tunisia                        | --8         | -1·9          | 0       | --6          | --8          | -3·8          | -7·9          |
|                            |                                | (-8,-8)     | (-2·1,-1·8)   | (0,0)   | (-6,-·5)     | (-1·3,-·3)   | (-4·3,-3·2)   | (-7·9,-7·8)   |
|                            | Turkey                         | -5·5        | -17·2         | 0       | -4·6         | -13·9        | -32·8         | -74           |
|                            |                                | (-5·6,-5·5) | (-18·6,-15·8) | (0,0)   | (-5,-4·2)    | (-18·4,-9·6) | (-37·3,-28·3) | (-74·3,-73·8) |
|                            | United Arab Emirates           | 1·1         | --4           | 0       | 0            | --2          | --8           | --2           |
|                            |                                | (1·1,1·1)   | (-5,-4)       | (0,0)   | (0,0)        | (-3,-1)      | (-9,-6)       | (-2,-2)       |
|                            | Yemen                          | 11·6        | -7·1          | 0       | -2·9         | -2·3         | -37·3         | -37·8         |
|                            |                                | (11·5,11·8) | (-7·6,-6·5)   | (0,0)   | (-3·1,-2·6)  | (-7·5,3)     | (-42·7,-31·9) | (-37·8,-37·8) |
| North America, High-income | Canada                         | ·1          | --4           | 0       | --2          | ·9           | -1·6          | -1·2          |
|                            |                                | (·1,·1)     | (-5,-4)       | (0,0)   | (-2,-1)      | (·7,1·2)     | (-1·9,-1·4)   | (-1·2,-1·2)   |
|                            | United States                  | 1·8         | -1·6          | --1     | -2·2         | 6·2          | -21·8         | -17·6         |
|                            |                                | (1·7,1·8)   | (-1·7,-1·5)   | (-1,-1) | (-2·4,-2)    | (3·6,9·1)    | (-24·7,-19·1) | (-17·6,-17·6) |
| Oceania                    | Federated States of Micronesia | 0           | 0             | 0       | 0            | 0            | 0             | --1           |
|                            |                                | (0,0)       | (0,0)         | (0,0)   | (0,0)        | (0,0)        | (0,0)         | (-1,-1)       |
|                            | Fiji                           | -1          | --2           | 0       | 0            | ·5           | -3            | -1            |
|                            |                                | (-1,-1)     | (-2,-1)       | (0,0)   | (0,0)        | (·4,·5)      | (-4,-2)       | (-2,-1)       |
|                            | Kiribati                       | 0           | --1           | 0       | 0            | 0            | --1           | -1            |
|                            |                                | (0,0)       | (-1,-1)       | (0,0)   | (0,0)        | (0,·1)       | (-1,-1)       | (-1,-1)       |
|                            | Marshall Islands               | 0           | 0             | 0       | 0            | 0            | 0             | 0             |
|                            |                                | (0,0)       | (0,0)         | (0,0)   | (0,0)        | (0,0)        | (0,0)         | (0,0)         |

|                                  |               |               |             |               |                 |                 |                 |
|----------------------------------|---------------|---------------|-------------|---------------|-----------------|-----------------|-----------------|
| Papua New Guinea                 | 4.9           | -3.6          | 0           | -6            | 3.5             | -5.8            | -1.5            |
|                                  | (4.9,5)       | (-3.8,-3.3)   | (0,0)       | (-7,-6)       | (2.4,4.6)       | (-7,-4.6)       | (-1.5,-1.5)     |
| Samoa                            | 0             | 0             | 0           | 0             | 0               | 0               | -1              |
|                                  | (0,0)         | (0,0)         | (0,0)       | (0,0)         | (0,0)           | (0,0)           | (-1,-1)         |
| Solomon Islands                  | -1            | -1            | 0           | 0             | 0               | -2              | -1              |
|                                  | (-1,-2)       | (-1,-1)       | (0,0)       | (0,0)         | (0,1)           | (-2,-2)         | (-1,-1)         |
| Tonga                            | 0             | 0             | 0           | 0             | 0               | 0               | 0               |
|                                  | (0,0)         | (0,0)         | (0,0)       | (0,0)         | (0,0)           | (0,0)           | (0,0)           |
| Vanuatu                          | -1            | -1            | 0           | 0             | -2              | -1              | 0               |
|                                  | (-1,-1)       | (-1,-1)       | (0,0)       | (0,0)         | (-1,-2)         | (-1,-1)         | (0,0)           |
| sub-Saharan Africa, Central      |               |               |             |               |                 |                 |                 |
| Angola                           | 53.1          | -22.9         | 3.6         | -11.2         | -2.7            | -37.5           | -17.6           |
|                                  | (52.9,53.5)   | (-24.7,-21.1) | (3.3,3.9)   | (-12.2,-10.2) | (-8.8,3.7)      | (-43.8,-31.1)   | (-17.7,-17.4)   |
| Central African Republic         | 6.2           | -4.1          | -1.4        | 1             | 7.4             | -8.5            | -6              |
|                                  | (6.1,6.3)     | (-4.4,-3.7)   | (-1.6,-1.3) | (-9,1.1)      | (5.9,8.9)       | (-10,-7)        | (-5,-6)         |
| Congo                            | 5.9           | -2.7          | -1          | -1            | 2.6             | -3.8            | 1.8             |
|                                  | (5.8,5.9)     | (-2.9,-2.5)   | (-1,-1)     | (-1,-1)       | (1.9,3.2)       | (-4.5,-3.1)     | (1.8,1.8)       |
| Democratic Republic of the Congo | 177.1         | -68           | 1.1         | 43.3          | 20.7            | -130.7          | 43.6            |
|                                  | (176.1,178.5) | (-73.5,-62.5) | (1,1.2)     | (39.4,47.2)   | (-2.4,43.4)     | (-152.8,-108.1) | (42.6,44.8)     |
| Equatorial Guinea                | 1.4           | -9            | -3          | -1.5          | 1.9             | -1.3            | 0               |
|                                  | (1.4,1.4)     | (-1,-8)       | (-3,-4)     | (-1.7,-1.4)   | (1.7,2.2)       | (-1.5,-1)       | (0,0)           |
| Gabon                            | 1.4           | -1            | 0           | 0             | 1               | -1.3            | -2              |
|                                  | (1.4,1.4)     | (-1.1,-9)     | (0,0)       | (0,0)         | (-8,1.3)        | (-1.5,-1)       | (-2,-2)         |
| sub-Saharan Africa, Eastern      |               |               |             |               |                 |                 |                 |
| Burundi                          | 22.7          | -7            | -4          | 1.9           | -8.5            | -17.7           | -9              |
|                                  | (22.7,22.8)   | (-7.5,-6.4)   | (-5,-4)     | (1.8,2.1)     | (-11.4,-5.6)    | (-20.7,-14.7)   | (-9,-8.9)       |
| Comoros                          | -8            | -5            | 0           | -1            | -6              | -6              | -8              |
|                                  | (-8,-8)       | (-5,-4)       | (0,0)       | (-1,-1)       | (-7,-5)         | (-7,-5)         | (-8,-8)         |
| Djibouti                         | -1            | -5            | 0           | -1            | -1              | -8              | -1.1            |
|                                  | (-1,-1)       | (-5,-4)       | (0,1)       | (-1,-1)       | (-2,1)          | (-9,-6)         | (-1.1,-1.1)     |
| Eritrea                          | 8.7           | -4.5          | -1          | -7            | -5              | -6.9            | -8.6            |
|                                  | (8.7,8.8)     | (-4.9,-4.2)   | (-2,-1)     | (-8,-7)       | (-6.1,-3.9)     | (-8,-5.7)       | (-8.6,-8.6)     |
| Ethiopia                         | 104.6         | -42.6         | -1.1        | -27.2         | -136.7          | -130.1          | -233.2          |
|                                  | (104.5,104.7) | (-46.1,-39.3) | (-1.2,-1)   | (-29.7,-24.7) | (-157.4,-115.9) | (-151.1,-108.4) | (-233.3,-233.2) |
| Kenya                            | 43.6          | -34.1         | 1.1         | -1.7          | 24.6            | -37.2           | -3.8            |
|                                  | (43.2,44)     | (-36.9,-31.3) | (1,1.2)     | (-1.9,-1.6)   | (18.2,31.3)     | (-43.7,-30.8)   | (-3.8,-3.7)     |
| Madagascar                       | 26.2          | -13.2         | -2          | 1.9           | -22.3           | -24             | -31.2           |
|                                  | (26.2,26.3)   | (-14.3,-12.2) | (-2,-2)     | (1.7,2.1)     | (-26.2,-18.4)   | (-27.9,-20)     | (-31.2,-31.1)   |

|                              |              |                     |                        |                       |                        |                        |                        |                        |
|------------------------------|--------------|---------------------|------------------------|-----------------------|------------------------|------------------------|------------------------|------------------------|
|                              | Malawi       | 29.1<br>(29,29.2)   | -23.5<br>(-25.4,-21.7) | -4.6<br>(-5,-4.2)     | -2.7<br>(-3,-2.5)      | -13.4<br>(-18.4,-8.1)  | -30.9<br>(-36,-25.7)   | -46<br>(-46,-46)       |
|                              | Mauritius    | -2<br>(-2,-.1)      | -1<br>(-1,-.1)         | 0<br>(0,0)            | 0<br>(-.1,0)           | .2<br>(.1,.2)          | -1<br>(-2,-.1)         | -3<br>(-3,-.3)         |
|                              | Mozambique   | 59<br>(58.8,59.3)   | -16.4<br>(-17.7,-15.1) | 28.4<br>(26.1,31)     | -18.1<br>(-19.8,-16.4) | -56.2<br>(-63.8,-48.2) | -45.1<br>(-52.3,-37.6) | -48.3<br>(-48.4,-48.2) |
|                              | Rwanda       | 10.4<br>(10.4,10.5) | -7.2<br>(-7.7,-6.6)    | -2.4<br>(-2.6,-2.2)   | -2.3<br>(-2.5,-2.1)    | -9.6<br>(-11.9,-7.3)   | -14.3<br>(-16.7,-11.9) | -25.3<br>(-25.3,-25.3) |
|                              | Seychelles   | 0<br>(0,0)          | 0<br>(0,0)             | 0<br>(0,0)            | 0<br>(0,0)             | 0<br>(0,0)             | 0<br>(0,0)             | 0<br>(0,0)             |
|                              | Somalia      | 23.6<br>(23.5,23.8) | -5.4<br>(-5.8,-5)      | .5<br>(.5,.6)         | 2.6<br>(2.4,2.9)       | -4.4<br>(-8,-.8)       | -21.5<br>(-25.1,-17.8) | -4.5<br>(-4.6,-4.4)    |
|                              | South Sudan  | 21<br>(20.9,21)     | -4.5<br>(-4.9,-4.2)    | 2.5<br>(2.3,2.7)      | .6<br>(.6,.7)          | -11.5<br>(-14.6,-8.3)  | -19.1<br>(-22.2,-15.8) | -10.9<br>(-11,-10.9)   |
|                              | Tanzania     | 88.3<br>(87.9,89)   | -33.3<br>(-36,-30.6)   | -5.7<br>(-6.2,-5.2)   | -14.6<br>(-15.9,-13.3) | 4.3<br>(-6.3,15)       | -63.7<br>(-74.4,-52.7) | -24.7<br>(-24.9,-24.4) |
|                              | Uganda       | 88.7<br>(88,89.4)   | -37.4<br>(-40.5,-34.4) | -13.8<br>(-15,-12.7)  | -17.2<br>(-18.8,-15.6) | 20.3<br>(10.7,29.9)    | -55.8<br>(-65.3,-46.2) | -15.2<br>(-15.4,-15.1) |
|                              | Zambia       | 34.3<br>(34.1,34.5) | -10.7<br>(-11.5,-9.8)  | -10.6<br>(-11.6,-9.8) | -1.3<br>(-1.4,-1.2)    | -5<br>(-4.3,3.4)       | -22.3<br>(-26.1,-18.5) | -11.1<br>(-11.2,-11.1) |
| sub-Saharan Africa, Southern | Botswana     | 0<br>(0,0)          | -6<br>(-7,-.6)         | -1<br>(-1,-.1)        | -3<br>(-3,-.2)         | .6<br>(.4,.7)          | -8<br>(-9,-.6)         | -1.2<br>(-1.2,-1.2)    |
|                              | Lesotho      | 0<br>(0,0)          | -1.5<br>(-1.6,-1.4)    | 1.1<br>(1,1.2)        | -6<br>(-6,-.5)         | 2.9<br>(2.5,3.3)       | -2.1<br>(-2.5,-1.7)    | -1<br>(-1,-.1)         |
|                              | Namibia      | .3<br>(.3,.3)       | -8<br>(-9,-.8)         | .1<br>(.1,.1)         | -2<br>(-2,-.1)         | 0<br>(-.2,.2)          | -1.1<br>(-1.3,-.9)     | -1.7<br>(-1.7,-1.7)    |
|                              | South Africa | .8<br>(.8,.8)       | -16.5<br>(-17.8,-15.1) | 2.5<br>(2.3,2.8)      | -2<br>(-2.2,-1.8)      | 1.6<br>(-2.5,4)        | -21.6<br>(-25.3,-17.9) | -35.1<br>(-35.2,-35)   |
|                              | Swaziland    | 0<br>(0,0)          | -9<br>(-1,-.8)         | .5<br>(.5,.6)         | -2<br>(-2,-.2)         | 1.6<br>(1.5,1.9)       | -1.1<br>(-1.3,-.9)     | 0<br>(0,0)             |
|                              | Zimbabwe     | 4.4<br>(4.3,4.5)    | -9.6<br>(-10.5,-8.8)   | -1.6<br>(-1.8,-1.5)   | 1.9<br>(1.8,2.1)       | 21.3<br>(19.1,23.5)    | -11.8<br>(-13.9,-9.7)  | 4.6<br>(4.5,4.6)       |
| sub-Saharan Africa, Western  | Benin        | 15.5<br>(15.4,15.5) | -5.7<br>(-6.2,-5.3)    | .3<br>(.2,.3)         | -1<br>(-1.1,-.9)       | -15.9<br>(-17.8,-13.9) | -12.5<br>(-14.5,-10.4) | -19.4<br>(-19.4,-19.4) |
|                              | Burkina Faso | 41.2<br>(41,41.4)   | -11.2<br>(-12.1,-10.3) | -3<br>(-3.3,-2.8)     | -6.5<br>(-7.1,-5.9)    | -4.9<br>(-10.1,.2)     | -31.6<br>(-36.9,-26.2) | -16.1<br>(-16.2,-15.9) |
|                              | Cameroon     | 35.4<br>(35.1,35.8) | -24<br>(-26,-22.1)     | 3.1<br>(2.9,3.4)      | 2.6<br>(2.3,2.8)       | 25.8<br>(20.5,31.6)    | -31.6<br>(-37.1,-26.1) | 11.4<br>(11.2,11.6)    |
|                              | Cape Verde   | -1<br>(-1,-.1)      | -1<br>(-2,-.1)         | 0<br>(0,0)            | -1<br>(-1,-.1)         | 0<br>(0,0)             | -2<br>(-2,-.1)         | -5<br>(-5,-.5)         |

|                       |                        |                         |                     |                        |                        |                         |                        |
|-----------------------|------------------------|-------------------------|---------------------|------------------------|------------------------|-------------------------|------------------------|
| Chad                  | 50.5<br>(50.1,51.1)    | -8.2<br>(-8.8,-7.5)     | 2.1<br>(1.9,2.2)    | -7.1<br>(-7.7,-6.4)    | 18.1<br>(12.9,23.2)    | -29.9<br>(-35,-24.7)    | 25.5<br>(25.2,25.9)    |
| Cote d'Ivoire         | 29.9<br>(29.7,30.1)    | -11.8<br>(-12.7,-10.8)  | -7<br>(-8,-6)       | 3<br>(2.7,3.3)         | 3.5<br>(-1.4,8.4)      | -29.2<br>(-34.1,-24.2)  | -5.3<br>(-5.4,-5.2)    |
| Ghana                 | 21.9<br>(21.7,22.1)    | -14<br>(-15.2,-12.9)    | -2<br>(-2,-2)       | -6.5<br>(-7,-5.9)      | 10.8<br>(6.7,15.1)     | -24.9<br>(-29.1,-20.6)  | -12.9<br>(-12.9,-12.8) |
| Guinea                | 23.9<br>(23.8,23.9)    | -5.9<br>(-6.3,-5.4)     | 1.1<br>(1,1.2)      | -1.3<br>(-1.5,-1.2)    | -15.3<br>(-18.8,-11.6) | -22.2<br>(-25.8,-18.4)  | -19.6<br>(-19.7,-19.6) |
| Guinea-Bissau         | 3.4<br>(3.4,3.4)       | -1.5<br>(-1.6,-1.4)     | .8<br>(.7,.8)       | .3<br>(.2,.3)          | .6<br>(0,1.3)          | -3.9<br>(-4.6,-3.2)     | -.3<br>(-.4,-.3)       |
| Liberia               | 7.9<br>(7.9,7.9)       | -3.3<br>(-3.6,-3.1)     | .1<br>(.1,.1)       | 1.5<br>(1.4,1.7)       | -9.3<br>(-10.4,-8.2)   | -6.5<br>(-7.5,-5.4)     | -9.6<br>(-9.7,-9.6)    |
| Mali                  | 67.5<br>(67.1,67.9)    | -10.1<br>(-10.9,-9.3)   | .4<br>(.4,.5)       | -6.6<br>(-7.2,-6)      | -1<br>(-8,6)           | -41.7<br>(-48.7,-34.5)  | 8.5<br>(8.2,8.8)       |
| Mauritania            | 4.4<br>(4.4,4.4)       | -2<br>(-2.2,-1.9)       | 0<br>(0,0)          | -.3<br>(-.3,-.3)       | 2<br>(1.4,2.6)         | -3.6<br>(-4.2,-3)       | .5<br>(.5,.6)          |
| Niger                 | 90<br>(89.9,90.2)      | -10.9<br>(-11.8,-10)    | .3<br>(.3,.4)       | 1.9<br>(1.8,2.1)       | -63.3<br>(-71.1,-55.5) | -48.7<br>(-56.5,-40.7)  | -30.7<br>(-30.8,-30.5) |
| Nigeria               | 498.9<br>(494.5,504.2) | -278.3<br>(-300.9,-256) | 35.4<br>(32.4,38.5) | -77.9<br>(-84.8,-70.8) | 226.9<br>(166.2,291.1) | -364.2<br>(-427.2,-301) | 40.9<br>(39.3,42.7)    |
| Sao Tome and Principe | .1<br>(.1,.1)          | -.1<br>(-.1,-.1)        | 0<br>(0,0)          | 0<br>(0,0)             | -.1<br>(-.1,0)         | -.1<br>(-.2,-.1)        | -.2<br>(-.2,-.2)       |
| Senegal               | 19.9<br>(19.9,19.9)    | -6.1<br>(-6.6,-5.6)     | .3<br>(.3,.3)       | -.9<br>(-1,-.8)        | -14.2<br>(-16.7,-11.7) | -15.7<br>(-18.2,-13.1)  | -16.8<br>(-16.8,-16.7) |
| Sierra Leone          | 8.6<br>(8.5,8.6)       | -5.6<br>(-6,-5.1)       | .5<br>(.5,.6)       | .8<br>(.8,.9)          | -3.2<br>(-5.4,-1.1)    | -13.1<br>(-15.3,-10.9)  | -12<br>(-12,-12)       |
| The Gambia            | 4.1<br>(4.1,4.1)       | -1.4<br>(-1.5,-1.3)     | 0<br>(0,0)          | 0<br>(0,0)             | -1.3<br>(-1.8,-.9)     | -2.6<br>(-3,-2.2)       | -1.2<br>(-1.2,-1.2)    |
| Togo                  | 10.5<br>(10.4,10.5)    | -5.9<br>(-6.4,-5.5)     | .4<br>(.3,.4)       | .6<br>(.6,.7)          | 3.2<br>(1.7,4.8)       | -9.3<br>(-10.9,-7.7)    | -.6<br>(-.6,-.5)       |

**Web table 6. Number of years with data in each decade by country.**

| <b>Web Table 6: Number of years with data in each decade by country.</b> |       |       |       |       |       |       |
|--------------------------------------------------------------------------|-------|-------|-------|-------|-------|-------|
|                                                                          | 1950s | 1960s | 1970s | 1980s | 1990s | 2000s |
| <b>Asia Pacific, High-income</b>                                         |       |       |       |       |       |       |
| Brunei                                                                   | 10    | 6     | 9     | 8     | 8     | 12    |
| Japan                                                                    | 10    | 10    | 10    | 10    | 10    | 12    |
| Singapore                                                                | 10    | 10    | 10    | 10    | 10    | 12    |
| South Korea                                                              | 10    | 10    | 8     | 10    | 10    | 12    |
| <b>Asia, Central</b>                                                     |       |       |       |       |       |       |
| Armenia                                                                  | 0     | 0     | 5     | 10    | 10    | 13    |
| Azerbaijan                                                               | 0     | 0     | 4     | 10    | 10    | 11    |
| Georgia                                                                  | 0     | 0     | 5     | 10    | 10    | 12    |
| Kazakhstan                                                               | 0     | 1     | 9     | 10    | 10    | 11    |
| Kyrgyzstan                                                               | 0     | 2     | 10    | 10    | 10    | 13    |
| Mongolia                                                                 | 0     | 6     | 10    | 10    | 10    | 11    |
| Tajikistan                                                               | 0     | 0     | 7     | 10    | 10    | 13    |
| Turkmenistan                                                             | 0     | 0     | 1     | 8     | 10    | 7     |
| Uzbekistan                                                               | 0     | 0     | 8     | 10    | 10    | 7     |
| <b>Asia, East</b>                                                        |       |       |       |       |       |       |
| China                                                                    | 3     | 10    | 10    | 10    | 10    | 14    |
| North Korea                                                              | 0     | 0     | 0     | 0     | 1     | 1     |
| Taiwan (Province of China)                                               | 5     | 10    | 10    | 10    | 10    | 13    |
| <b>Asia, South</b>                                                       |       |       |       |       |       |       |
| Afghanistan                                                              | 1     | 4     | 2     | 9     | 10    | 11    |
| Bangladesh                                                               | 10    | 10    | 10    | 10    | 10    | 12    |
| Bhutan                                                                   | 0     | 0     | 4     | 10    | 10    | 10    |
| India                                                                    | 10    | 10    | 10    | 10    | 10    | 13    |
| Nepal                                                                    | 10    | 10    | 10    | 10    | 10    | 11    |
| Pakistan                                                                 | 10    | 10    | 10    | 10    | 10    | 13    |
| <b>Asia, Southeast</b>                                                   |       |       |       |       |       |       |
| Cambodia                                                                 | 1     | 0     | 9     | 10    | 10    | 11    |
| Indonesia                                                                | 10    | 10    | 10    | 10    | 10    | 13    |
| Laos                                                                     | 0     | 0     | 2     | 9     | 10    | 12    |
| Malaysia                                                                 | 10    | 10    | 10    | 3     | 10    | 10    |
| Maldives                                                                 | 1     | 4     | 7     | 10    | 10    | 12    |
| Myanmar                                                                  | 0     | 2     | 5     | 8     | 8     | 7     |
| Philippines                                                              | 10    | 10    | 10    | 10    | 10    | 12    |
| Sri Lanka                                                                | 10    | 10    | 10    | 10    | 9     | 8     |
| Thailand                                                                 | 10    | 10    | 10    | 10    | 10    | 10    |
| Timor-Leste                                                              | 0     | 3     | 10    | 10    | 10    | 10    |
| Vietnam                                                                  | 0     | 6     | 10    | 10    | 10    | 11    |
| <b>Australasia</b>                                                       |       |       |       |       |       |       |
| Australia                                                                | 10    | 10    | 10    | 10    | 10    | 12    |
| New Zealand                                                              | 10    | 10    | 10    | 10    | 10    | 12    |

|                                  |    |    |    |    |    |    |
|----------------------------------|----|----|----|----|----|----|
| Caribbean                        |    |    |    |    |    |    |
| Antigua and Barbuda              | 10 | 8  | 9  | 6  | 10 | 10 |
| Barbados                         | 10 | 10 | 10 | 10 | 6  | 9  |
| Belize                           | 10 | 10 | 10 | 10 | 10 | 12 |
| Cuba                             | 1  | 10 | 10 | 10 | 10 | 11 |
| Dominica                         | 10 | 8  | 10 | 10 | 10 | 11 |
| Dominican Republic               | 10 | 10 | 10 | 10 | 10 | 12 |
| Grenada                          | 10 | 10 | 5  | 4  | 10 | 11 |
| Guyana                           | 10 | 10 | 10 | 10 | 10 | 10 |
| Haiti                            | 7  | 10 | 10 | 10 | 10 | 12 |
| Jamaica                          | 10 | 10 | 10 | 10 | 10 | 7  |
| Saint Lucia                      | 10 | 4  | 8  | 10 | 10 | 8  |
| Saint Vincent and the Grenadines | 7  | 5  | 7  | 8  | 7  | 11 |
| Suriname                         | 8  | 6  | 8  | 10 | 10 | 10 |
| The Bahamas                      | 0  | 4  | 9  | 10 | 10 | 9  |
| Trinidad and Tobago              | 10 | 10 | 10 | 10 | 10 | 9  |
| Europe, Central                  |    |    |    |    |    |    |
| Albania                          | 5  | 5  | 2  | 10 | 10 | 10 |
| Bosnia and Herzegovina           | 0  | 0  | 0  | 5  | 5  | 12 |
| Bulgaria                         | 10 | 10 | 10 | 10 | 10 | 13 |
| Croatia                          | 0  | 0  | 0  | 5  | 10 | 13 |
| Czech Republic                   | 10 | 10 | 10 | 10 | 10 | 13 |
| Hungary                          | 10 | 10 | 10 | 10 | 10 | 13 |
| Macedonia                        | 0  | 0  | 0  | 8  | 10 | 12 |
| Montenegro                       | 0  | 1  | 1  | 1  | 6  | 11 |
| Poland                           | 10 | 10 | 10 | 10 | 10 | 12 |
| Romania                          | 10 | 10 | 10 | 10 | 10 | 12 |
| Serbia                           | 1  | 1  | 1  | 9  | 10 | 13 |
| Slovakia                         | 10 | 10 | 10 | 10 | 10 | 12 |
| Slovenia                         | 0  | 0  | 0  | 8  | 10 | 12 |
| Europe, Eastern                  |    |    |    |    |    |    |
| Belarus                          | 1  | 10 | 10 | 10 | 10 | 12 |
| Estonia                          | 1  | 10 | 10 | 10 | 10 | 13 |
| Latvia                           | 1  | 10 | 10 | 10 | 10 | 13 |
| Lithuania                        | 1  | 10 | 10 | 10 | 10 | 13 |
| Moldova                          | 0  | 1  | 3  | 10 | 10 | 13 |
| Russia                           | 1  | 10 | 10 | 10 | 10 | 13 |
| Ukraine                          | 1  | 10 | 10 | 10 | 10 | 13 |
| Europe, Western                  |    |    |    |    |    |    |
| Andorra                          | 5  | 0  | 0  | 0  | 2  | 8  |
| Austria                          | 10 | 10 | 10 | 10 | 10 | 12 |
| Belgium                          | 10 | 10 | 10 | 10 | 10 | 11 |
| Cyprus                           | 6  | 4  | 7  | 10 | 10 | 12 |
| Denmark                          | 10 | 10 | 10 | 10 | 10 | 12 |
| Finland                          | 10 | 10 | 10 | 10 | 10 | 12 |



|                          |    |    |    |    |    |    |
|--------------------------|----|----|----|----|----|----|
| France                   | 10 | 10 | 10 | 10 | 10 | 12 |
| Germany                  | 4  | 10 | 10 | 10 | 10 | 13 |
| Greece                   | 9  | 10 | 10 | 10 | 10 | 12 |
| Iceland                  | 10 | 10 | 10 | 10 | 10 | 12 |
| Ireland                  | 10 | 10 | 10 | 10 | 10 | 12 |
| Israel                   | 10 | 10 | 10 | 10 | 10 | 13 |
| Italy                    | 10 | 10 | 10 | 10 | 10 | 11 |
| Luxembourg               | 10 | 10 | 10 | 10 | 10 | 12 |
| Malta                    | 10 | 10 | 10 | 10 | 10 | 12 |
| Netherlands              | 10 | 10 | 10 | 10 | 10 | 12 |
| Norway                   | 10 | 10 | 10 | 10 | 10 | 13 |
| Portugal                 | 10 | 10 | 10 | 10 | 10 | 12 |
| Spain                    | 10 | 10 | 10 | 10 | 10 | 12 |
| Sweden                   | 10 | 10 | 10 | 10 | 10 | 12 |
| Switzerland              | 10 | 10 | 10 | 10 | 10 | 12 |
| United Kingdom           | 10 | 10 | 10 | 10 | 10 | 12 |
| Latin America, Andean    |    |    |    |    |    |    |
| Bolivia                  | 9  | 10 | 10 | 10 | 10 | 8  |
| Ecuador                  | 10 | 10 | 10 | 10 | 10 | 11 |
| Peru                     | 10 | 10 | 10 | 10 | 10 | 13 |
| Latin America, Central   |    |    |    |    |    |    |
| Colombia                 | 10 | 10 | 10 | 10 | 10 | 12 |
| Costa Rica               | 10 | 10 | 10 | 10 | 10 | 12 |
| El Salvador              | 10 | 10 | 10 | 10 | 10 | 11 |
| Guatemala                | 10 | 10 | 10 | 10 | 10 | 11 |
| Honduras                 | 10 | 10 | 10 | 10 | 10 | 12 |
| Mexico                   | 10 | 10 | 10 | 10 | 10 | 13 |
| Nicaragua                | 10 | 10 | 10 | 10 | 10 | 12 |
| Panama                   | 10 | 10 | 10 | 10 | 10 | 11 |
| Venezuela                | 10 | 10 | 10 | 10 | 10 | 12 |
| Latin America, Southern  |    |    |    |    |    |    |
| Argentina                | 10 | 10 | 10 | 10 | 10 | 12 |
| Chile                    | 10 | 10 | 10 | 10 | 10 | 12 |
| Uruguay                  | 10 | 10 | 10 | 10 | 10 | 12 |
| Latin America, Tropical  |    |    |    |    |    |    |
| Brazil                   | 10 | 10 | 10 | 10 | 10 | 12 |
| Paraguay                 | 10 | 10 | 10 | 10 | 10 | 11 |
| North Africa/Middle East |    |    |    |    |    |    |
| Algeria                  | 8  | 9  | 10 | 10 | 10 | 8  |
| Bahrain                  | 3  | 4  | 6  | 9  | 9  | 11 |
| Egypt                    | 10 | 10 | 10 | 10 | 10 | 12 |
| Iran                     | 1  | 5  | 10 | 10 | 10 | 11 |
| Iraq                     | 3  | 10 | 10 | 10 | 10 | 11 |
| Jordan                   | 6  | 10 | 10 | 10 | 10 | 13 |
| Kuwait                   | 1  | 10 | 10 | 10 | 9  | 12 |

|                                  |    |    |    |    |    |    |
|----------------------------------|----|----|----|----|----|----|
| Lebanon                          | 1  | 6  | 10 | 10 | 10 | 5  |
| Libya                            | 2  | 7  | 10 | 10 | 7  | 5  |
| Morocco                          | 7  | 10 | 10 | 10 | 10 | 9  |
| Oman                             | 0  | 6  | 8  | 8  | 3  | 4  |
| Palestine                        | 0  | 0  | 1  | 3  | 5  | 10 |
| Qatar                            | 0  | 0  | 4  | 10 | 8  | 12 |
| Saudi Arabia                     | 0  | 0  | 5  | 7  | 2  | 13 |
| Sudan                            | 5  | 10 | 10 | 10 | 10 | 9  |
| Syria                            | 7  | 10 | 10 | 10 | 10 | 8  |
| Tunisia                          | 7  | 10 | 10 | 10 | 10 | 12 |
| Turkey                           | 8  | 10 | 10 | 10 | 10 | 12 |
| United Arab Emirates             | 2  | 5  | 7  | 4  | 2  | 2  |
| Yemen                            | 5  | 10 | 10 | 10 | 10 | 7  |
| North America, High-income       |    |    |    |    |    |    |
| Canada                           | 10 | 10 | 10 | 10 | 10 | 12 |
| United States                    | 10 | 10 | 10 | 10 | 10 | 12 |
| Oceania                          |    |    |    |    |    |    |
| Federated States of Micronesia   | 1  | 4  | 5  | 4  | 7  | 1  |
| Fiji                             | 10 | 10 | 10 | 9  | 6  | 8  |
| Kiribati                         | 5  | 8  | 4  | 1  | 10 | 6  |
| Marshall Islands                 | 0  | 0  | 0  | 6  | 8  | 3  |
| Papua New Guinea                 | 2  | 5  | 6  | 8  | 8  | 1  |
| Samoa                            | 9  | 10 | 9  | 1  | 1  | 4  |
| Solomon Islands                  | 4  | 6  | 2  | 2  | 6  | 2  |
| Tonga                            | 5  | 8  | 5  | 4  | 1  | 3  |
| Vanuatu                          | 3  | 3  | 2  | 7  | 10 | 8  |
| sub-Saharan Africa, Central      |    |    |    |    |    |    |
| Angola                           | 0  | 0  | 4  | 10 | 10 | 11 |
| Central African Republic         | 2  | 5  | 10 | 10 | 10 | 11 |
| Congo                            | 2  | 3  | 4  | 10 | 10 | 12 |
| Democratic Republic of the Congo | 0  | 0  | 10 | 10 | 10 | 10 |
| Equatorial Guinea                | 0  | 0  | 4  | 10 | 10 | 3  |
| Gabon                            | 0  | 0  | 8  | 10 | 10 | 12 |
| sub-Saharan Africa, Eastern      |    |    |    |    |    |    |
| Burundi                          | 1  | 9  | 10 | 10 | 10 | 12 |
| Comoros                          | 1  | 2  | 9  | 10 | 10 | 3  |
| Djibouti                         | 0  | 0  | 3  | 10 | 10 | 7  |
| Eritrea                          | 0  | 0  | 10 | 10 | 10 | 2  |
| Ethiopia                         | 0  | 2  | 10 | 10 | 10 | 11 |
| Kenya                            | 10 | 10 | 10 | 10 | 10 | 10 |
| Madagascar                       | 7  | 8  | 10 | 10 | 10 | 13 |
| Malawi                           | 3  | 9  | 10 | 10 | 10 | 12 |
| Mauritius                        | 10 | 10 | 10 | 10 | 10 | 12 |
| Mozambique                       | 2  | 5  | 10 | 10 | 10 | 12 |
| Rwanda                           | 4  | 10 | 10 | 10 | 10 | 11 |

|                              |   |    |    |    |    |    |
|------------------------------|---|----|----|----|----|----|
| Seychelles                   | 9 | 10 | 10 | 10 | 9  | 13 |
| Somalia                      | 0 | 0  | 0  | 8  | 10 | 7  |
| South Sudan                  | 0 | 0  | 0  | 7  | 10 | 10 |
| Tanzania                     | 3 | 9  | 10 | 10 | 10 | 12 |
| Uganda                       | 3 | 8  | 10 | 10 | 10 | 12 |
| Zambia                       | 3 | 9  | 10 | 10 | 10 | 12 |
| sub-Saharan Africa, Southern |   |    |    |    |    |    |
| Botswana                     | 2 | 7  | 10 | 10 | 10 | 8  |
| Lesotho                      | 7 | 10 | 10 | 10 | 10 | 10 |
| Namibia                      | 0 | 3  | 10 | 10 | 10 | 7  |
| South Africa                 | 0 | 2  | 10 | 10 | 10 | 13 |
| Swaziland                    | 4 | 5  | 7  | 10 | 10 | 11 |
| Zimbabwe                     | 2 | 9  | 10 | 10 | 10 | 11 |
| sub-Saharan Africa, Western  |   |    |    |    |    |    |
| Benin                        | 3 | 10 | 10 | 10 | 10 | 12 |
| Burkina Faso                 | 0 | 7  | 10 | 10 | 10 | 11 |
| Cameroon                     | 9 | 10 | 10 | 10 | 10 | 12 |
| Cape Verde                   | 4 | 5  | 10 | 10 | 10 | 3  |
| Chad                         | 0 | 1  | 10 | 10 | 10 | 10 |
| Cote d'Ivoire                | 5 | 10 | 10 | 10 | 10 | 12 |
| Ghana                        | 6 | 10 | 10 | 10 | 10 | 12 |
| Guinea                       | 0 | 0  | 9  | 10 | 10 | 13 |
| Guinea-Bissau                | 0 | 0  | 5  | 10 | 10 | 7  |
| Liberia                      | 5 | 9  | 10 | 10 | 10 | 12 |
| Mali                         | 0 | 8  | 10 | 10 | 10 | 8  |
| Mauritania                   | 4 | 10 | 10 | 10 | 10 | 8  |
| Niger                        | 0 | 6  | 10 | 10 | 10 | 12 |
| Nigeria                      | 0 | 7  | 10 | 10 | 10 | 12 |
| Sao Tome and Principe        | 4 | 8  | 7  | 10 | 10 | 9  |
| Senegal                      | 7 | 10 | 10 | 10 | 10 | 13 |
| Sierra Leone                 | 2 | 7  | 8  | 10 | 10 | 11 |
| The Gambia                   | 2 | 5  | 7  | 10 | 10 | 9  |
| Togo                         | 4 | 9  | 10 | 10 | 10 | 11 |

**Web figure 1. Under-5 mortality rate for 188 countries.**

Asia Pacific, High-income  
Brunei (BRN)

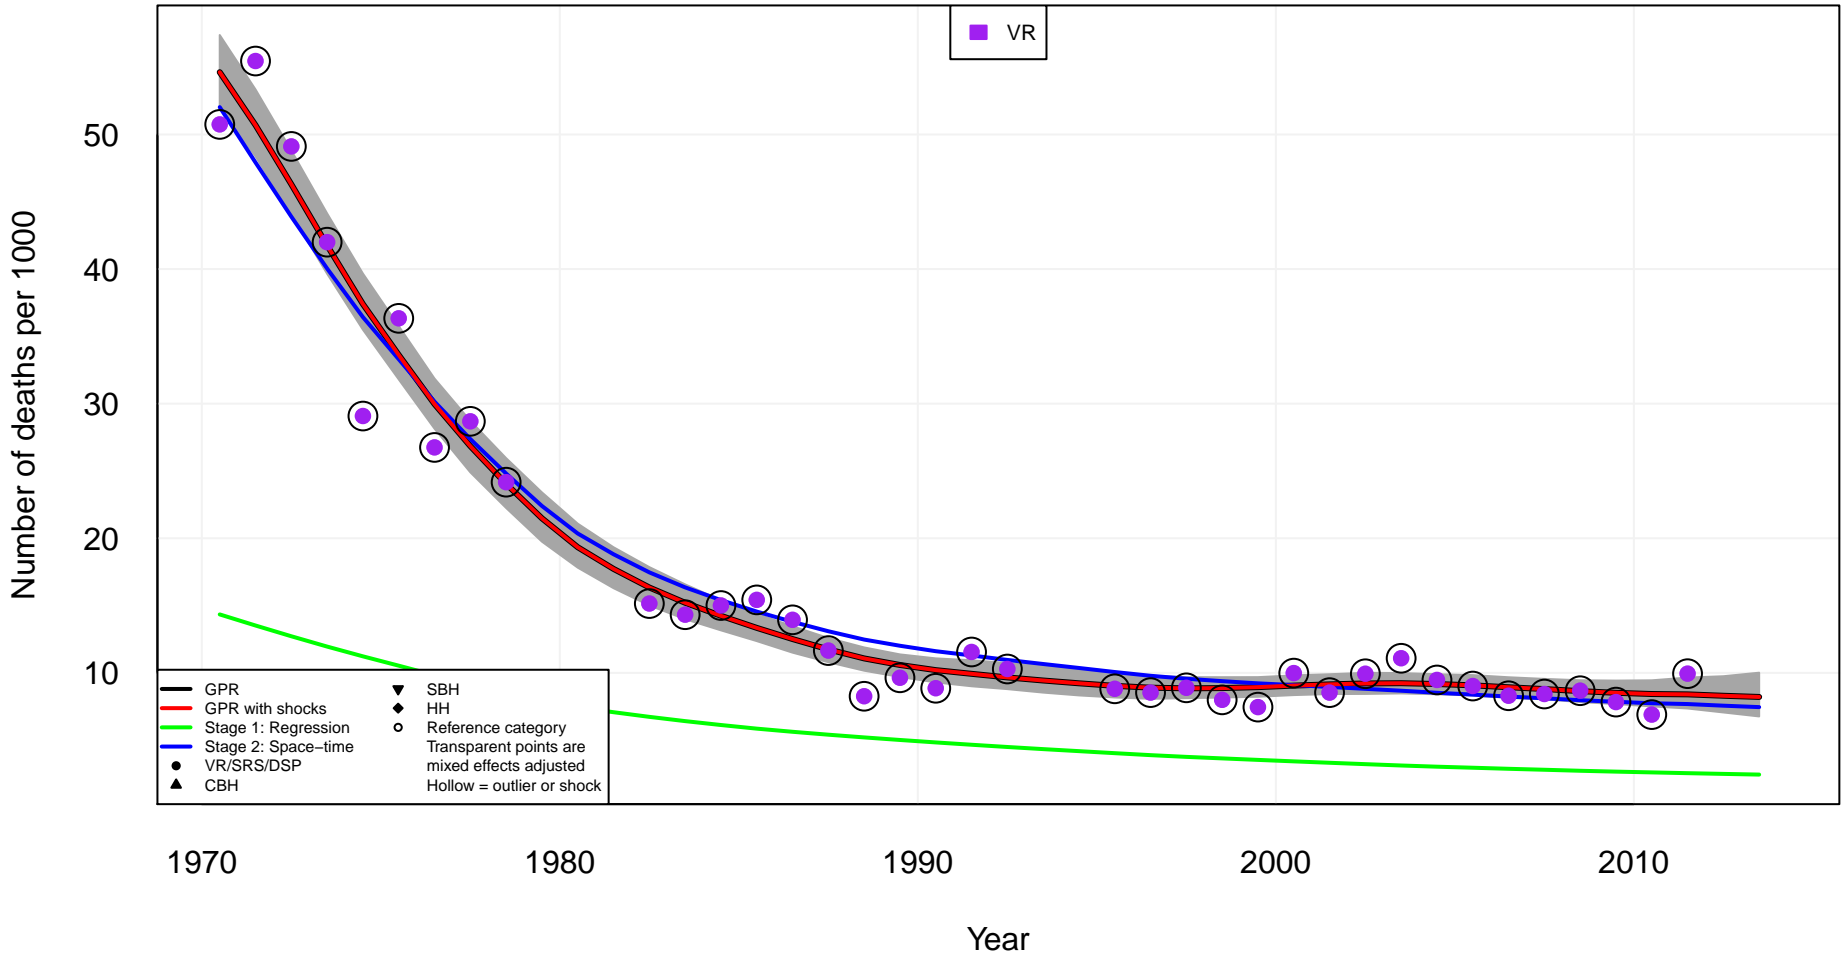

# Asia Pacific, High-income Japan (JPN)

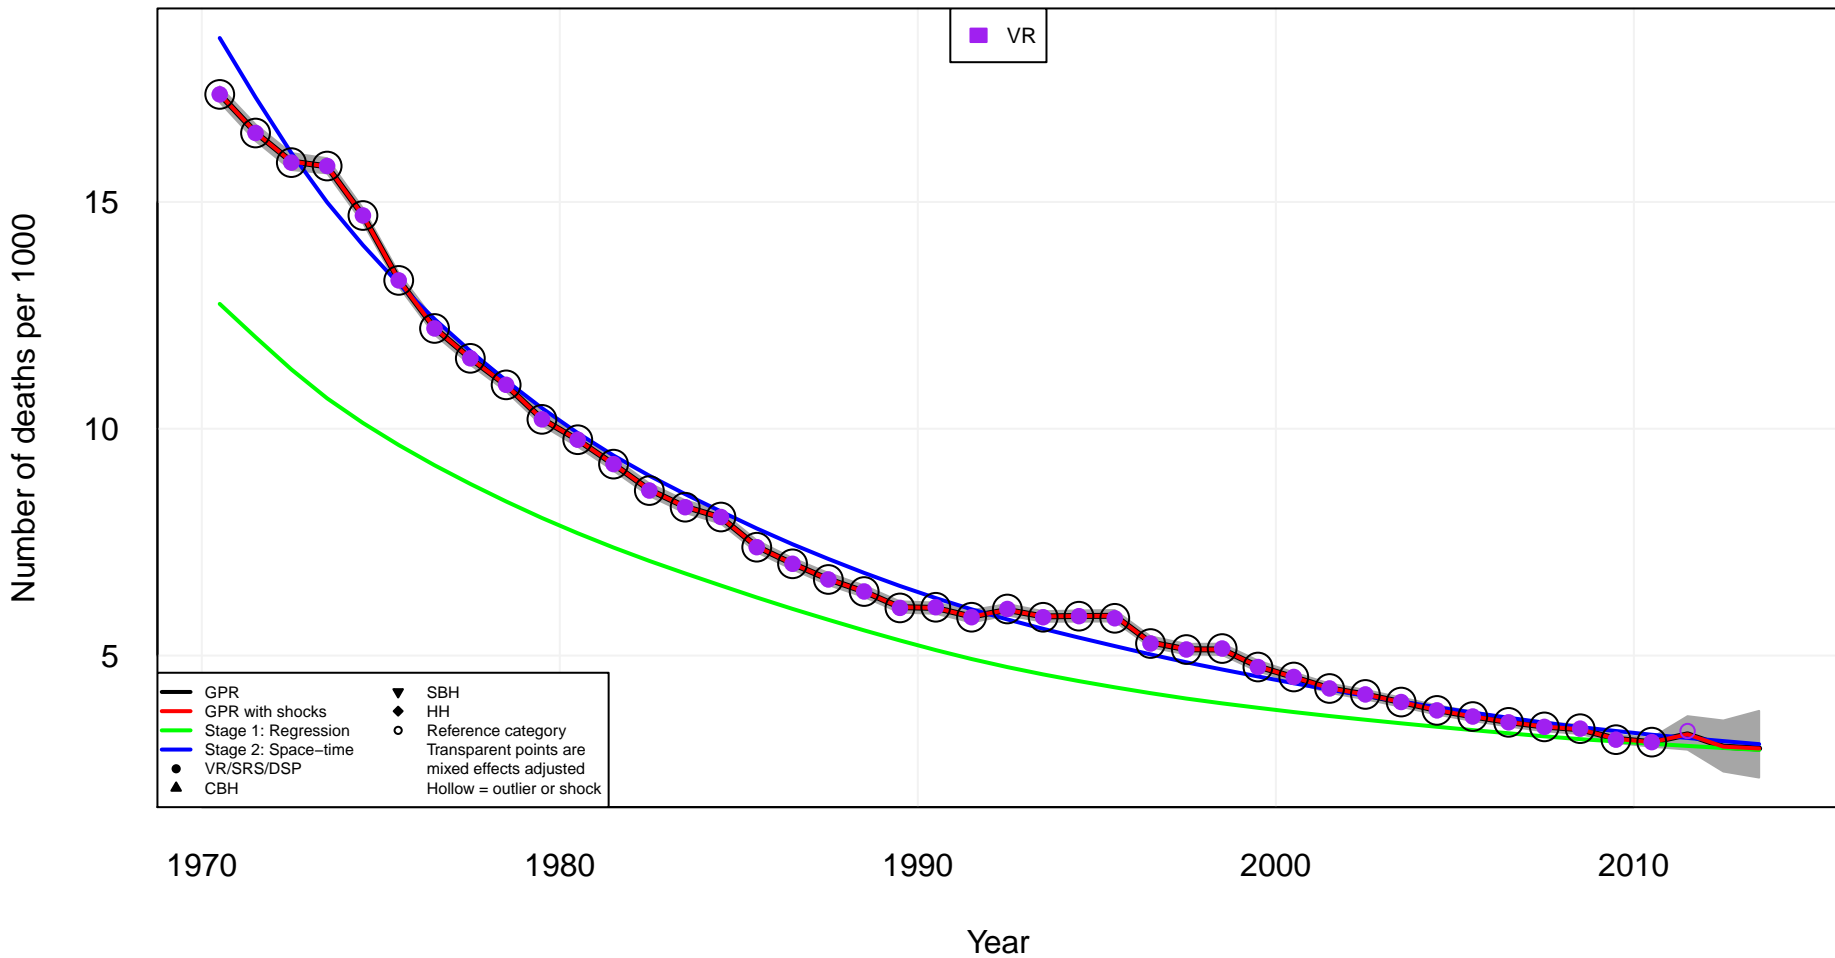

# Asia Pacific, High-income South Korea (KOR)

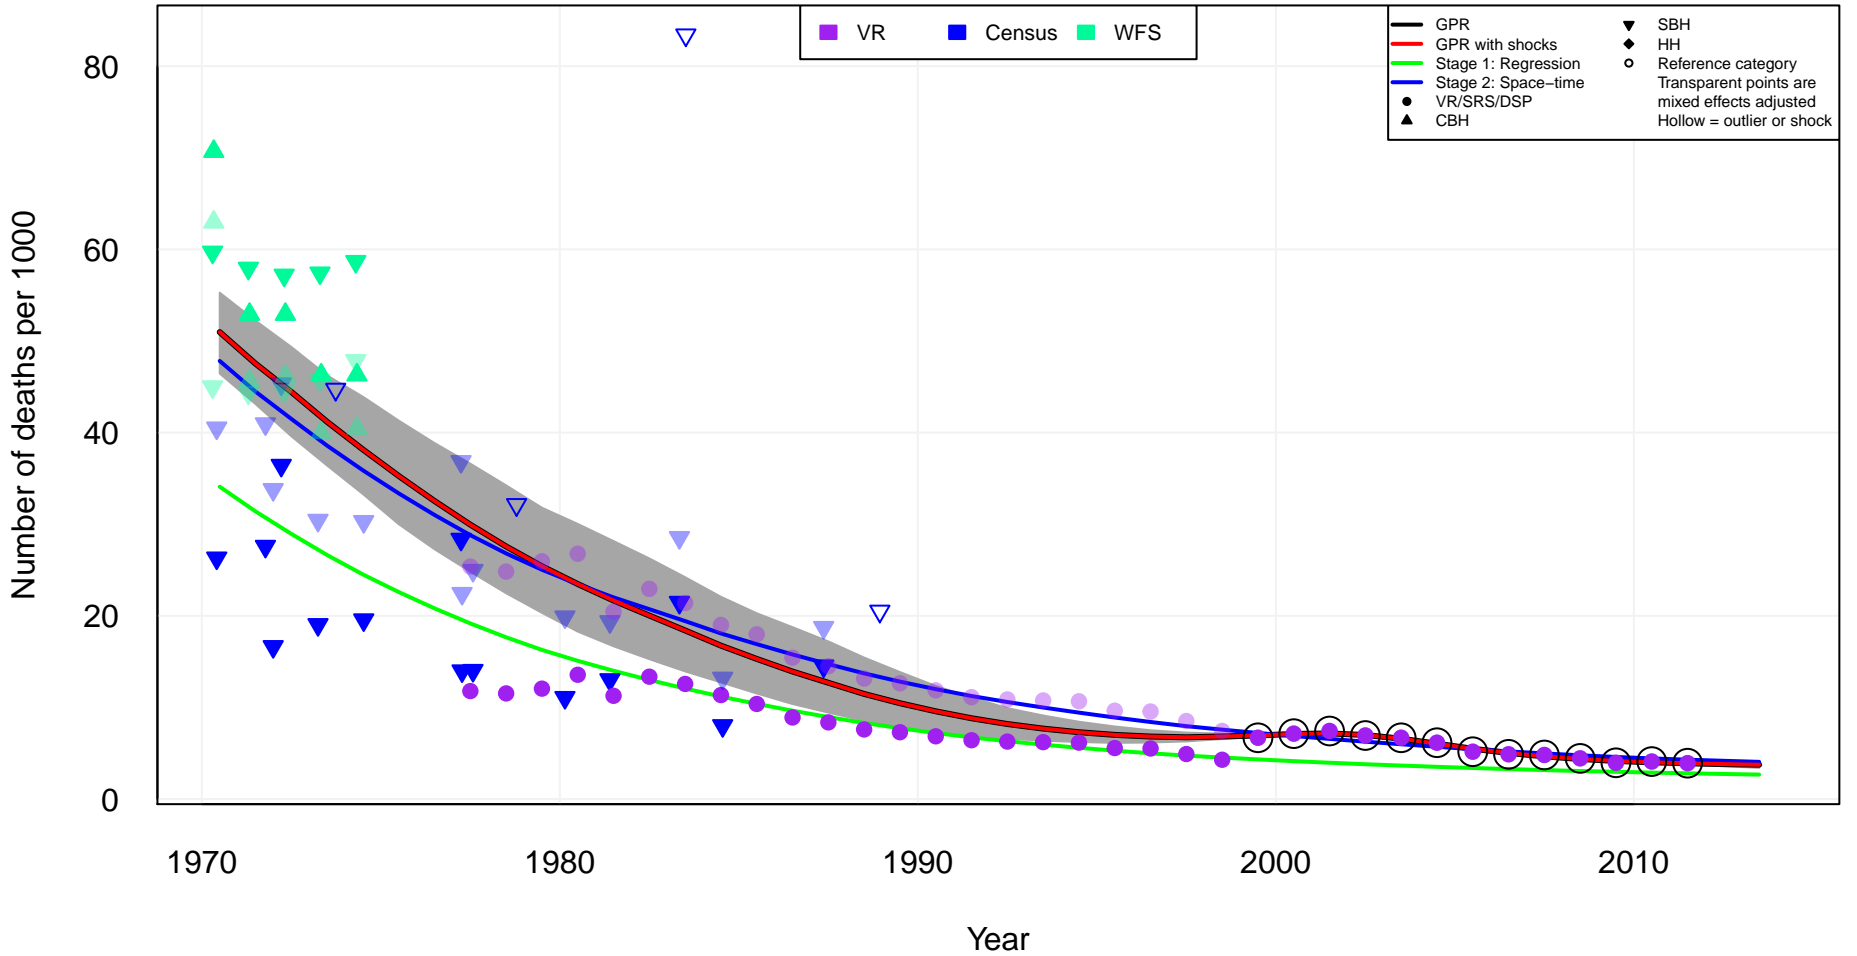

# Asia Pacific, High-income Singapore (SGP)

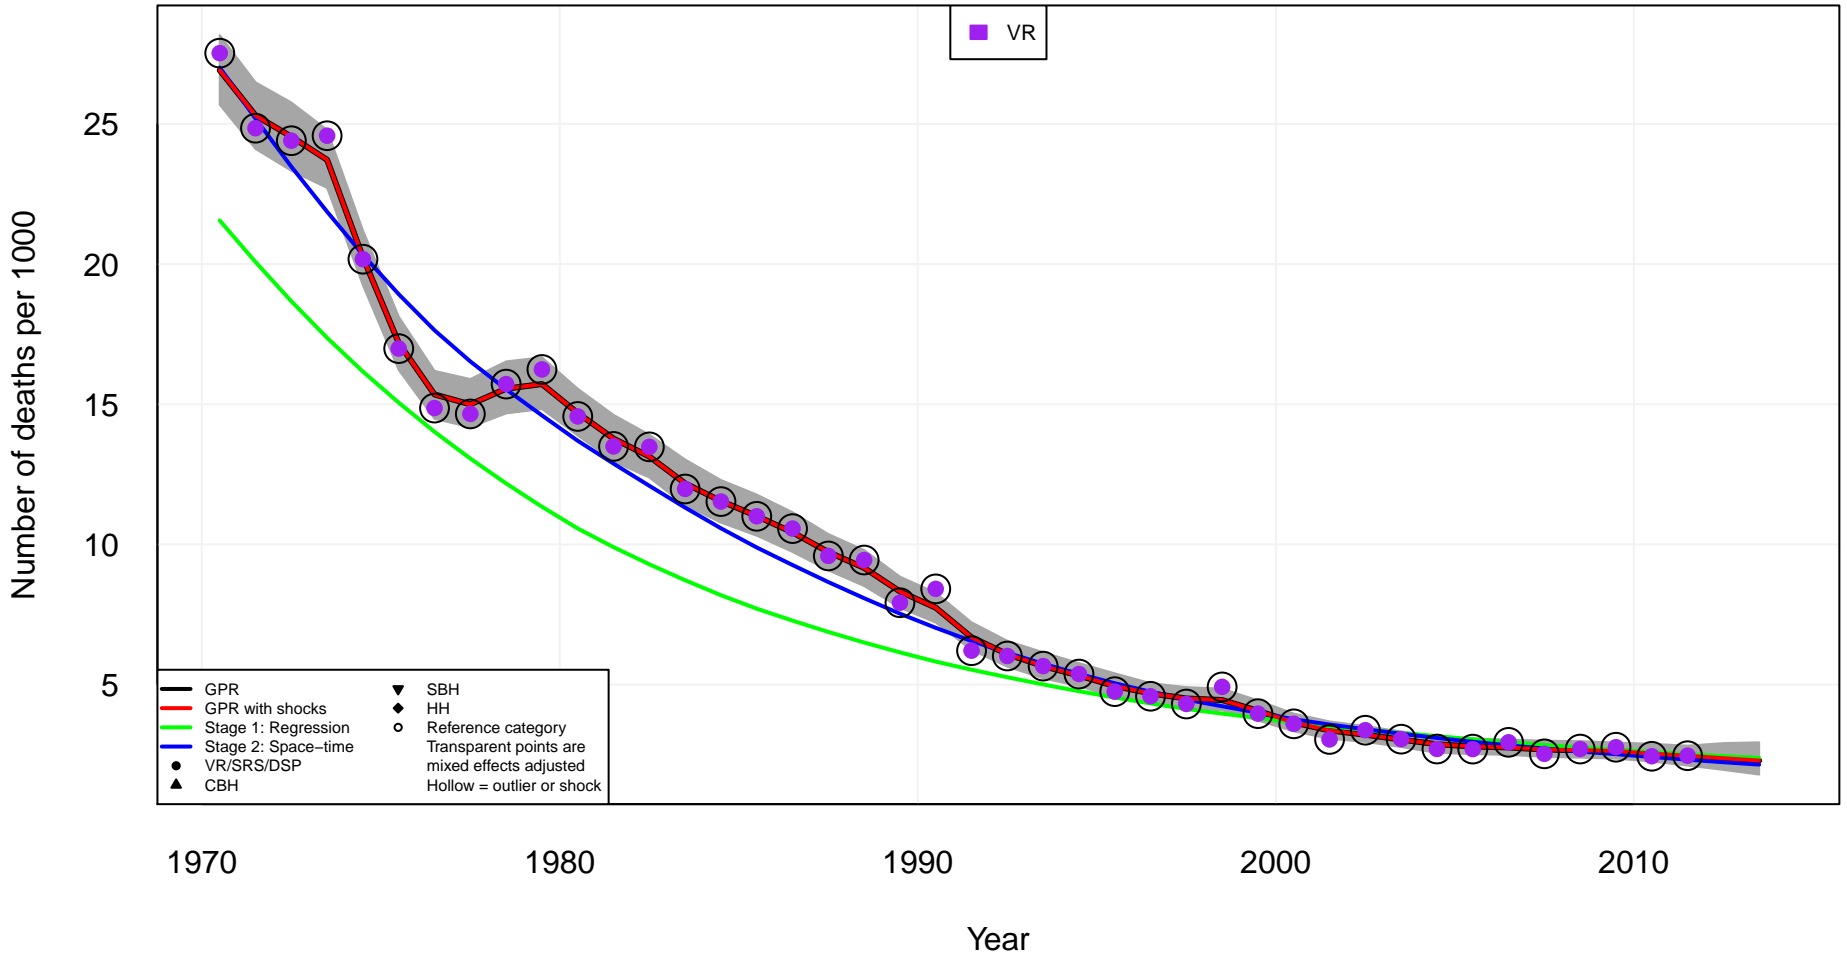



# Asia, Central Armenia (ARM)

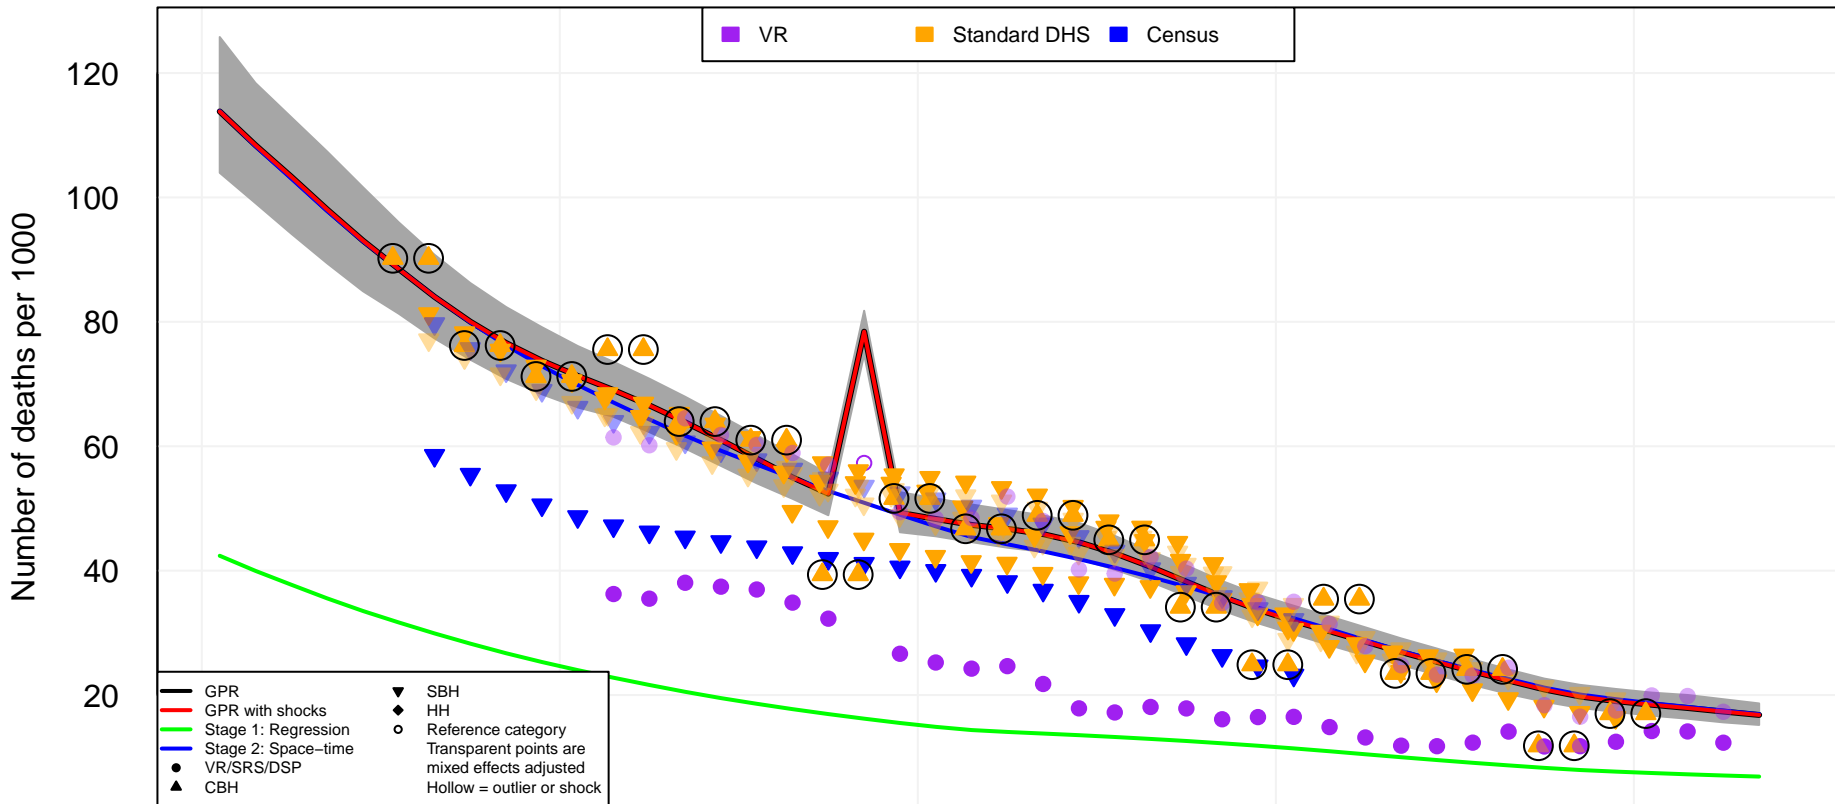

1970

1980

1990

2000

2010

Year

# Asia, Central Azerbaijan (AZE)

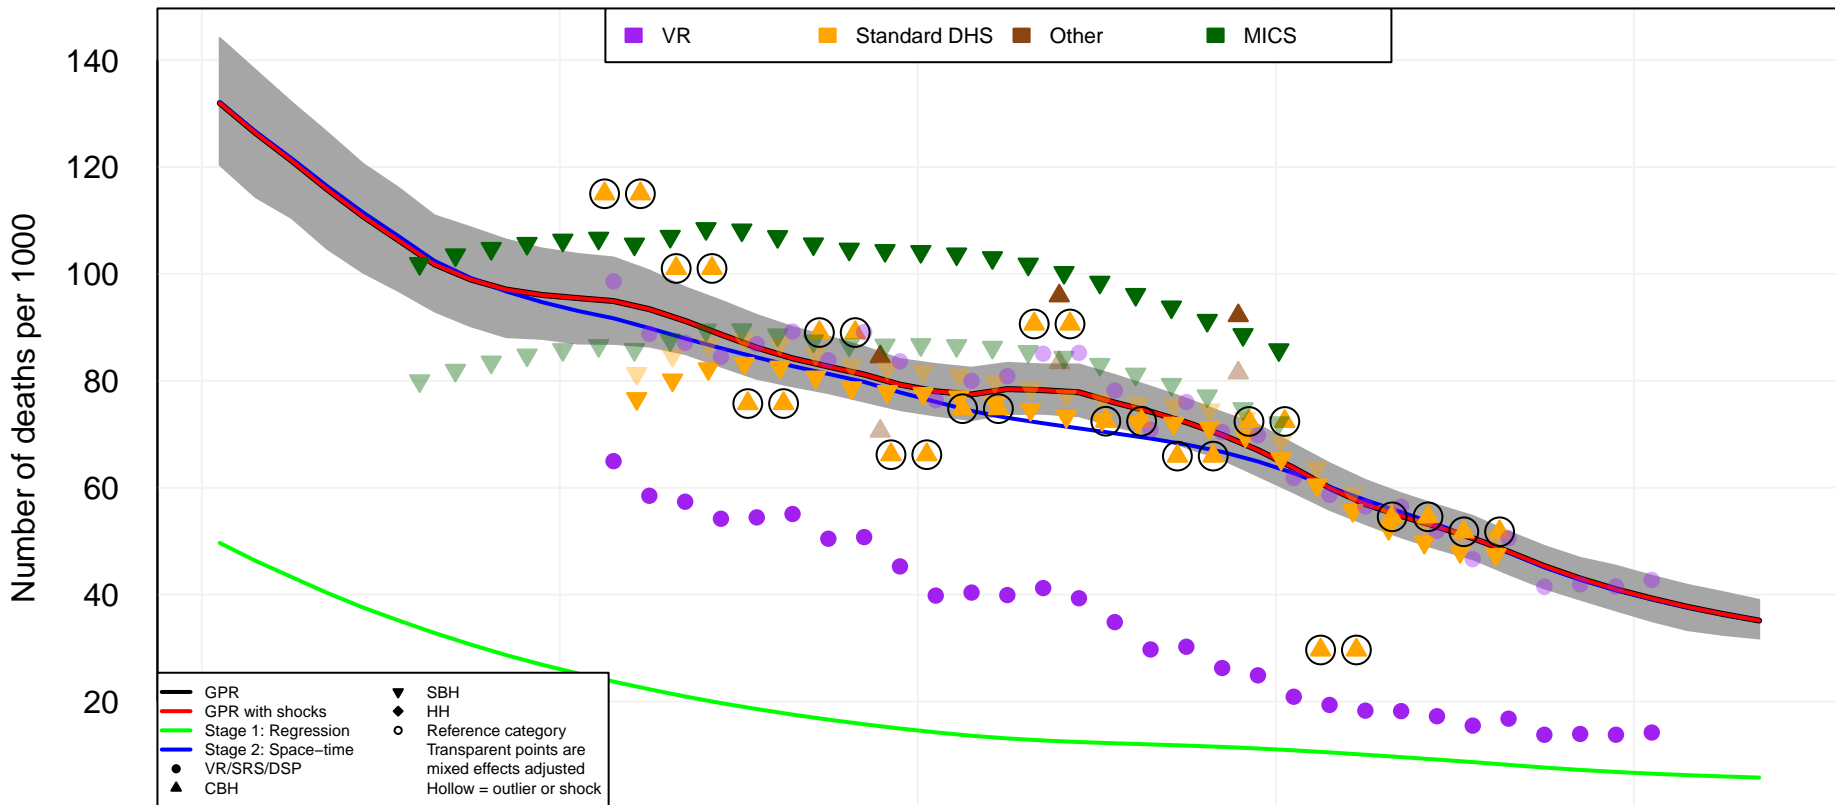

1970

1980

1990

2000

2010

Year

# Asia, Central Georgia (GEO)

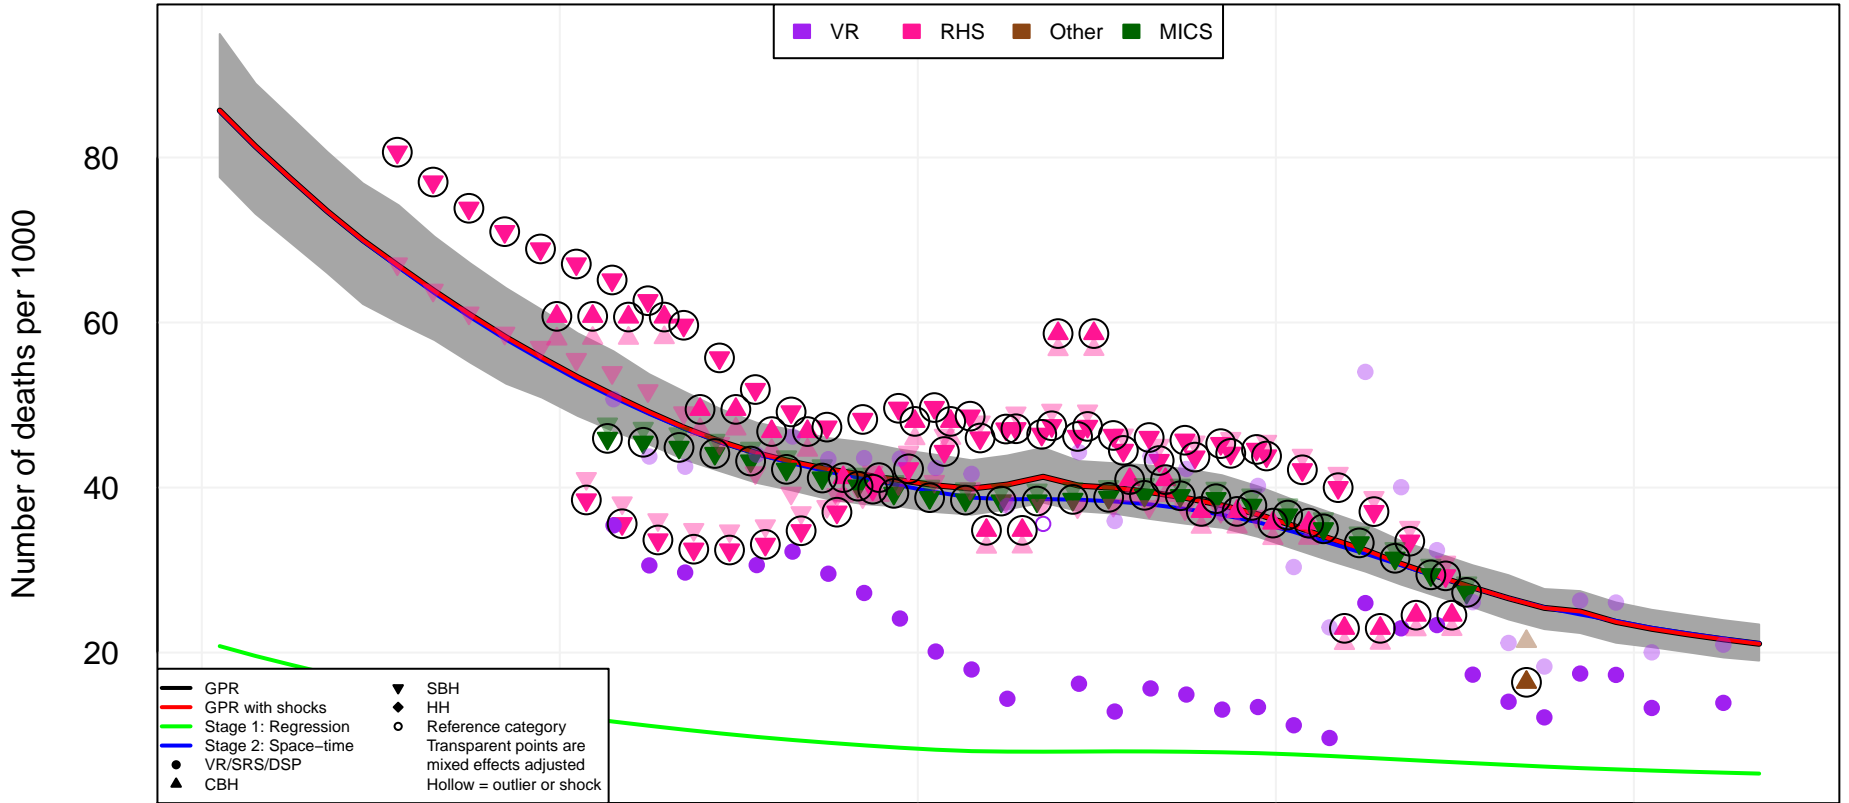

1970

1980

1990

2000

2010

Year

# Asia, Central Kazakhstan (KAZ)

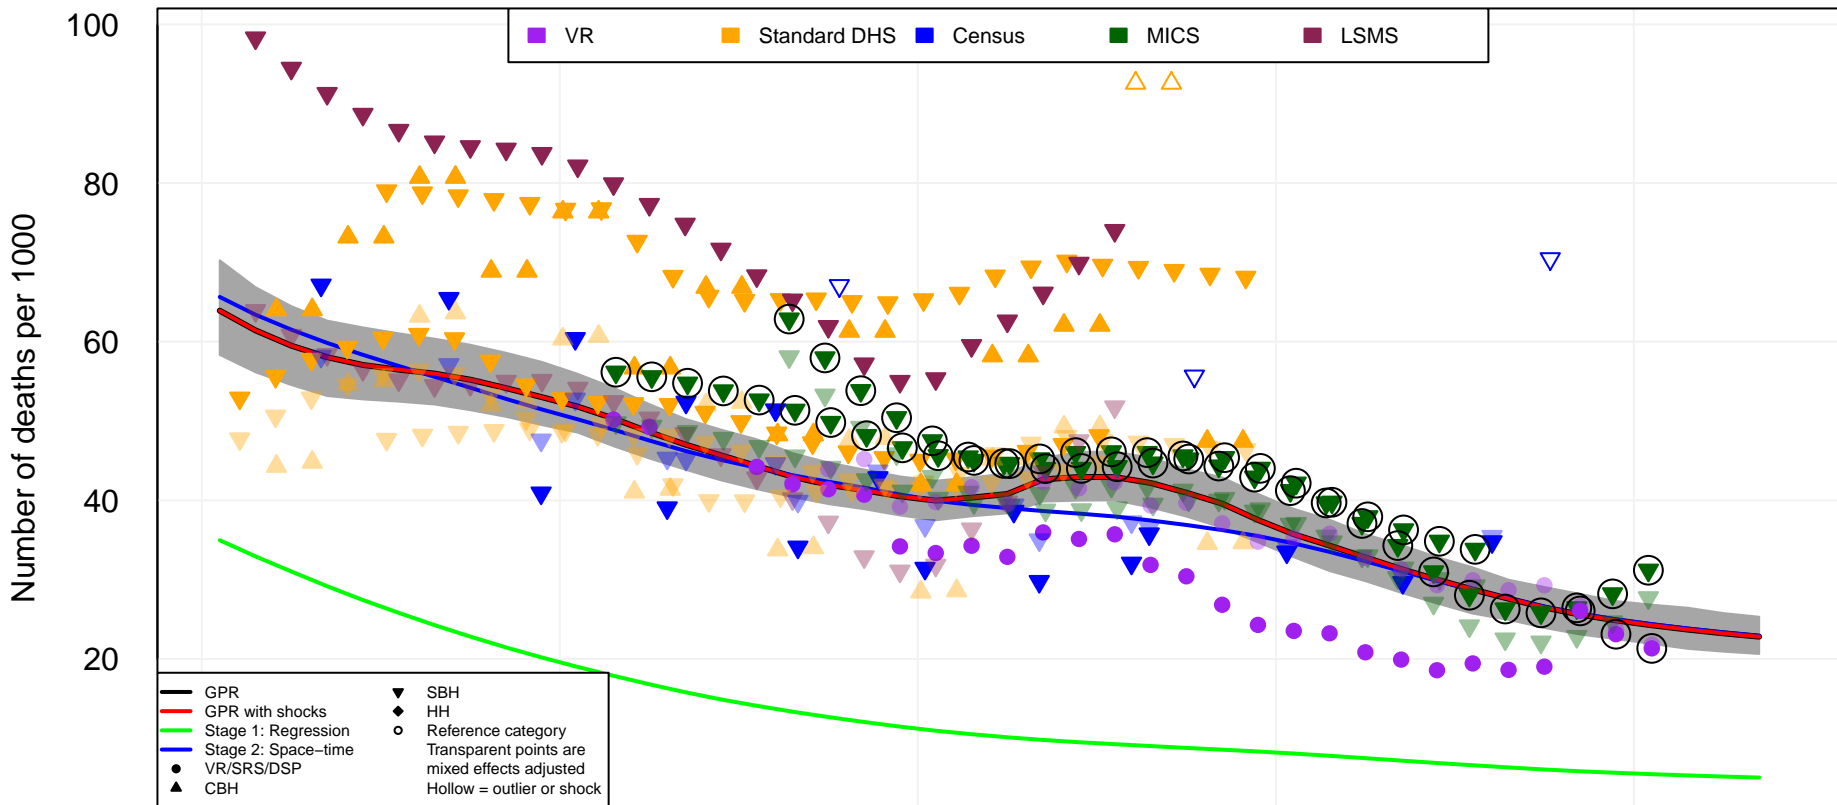

1970

1980

1990

2000

2010

Year

# Asia, Central Kyrgyzstan (KGZ)

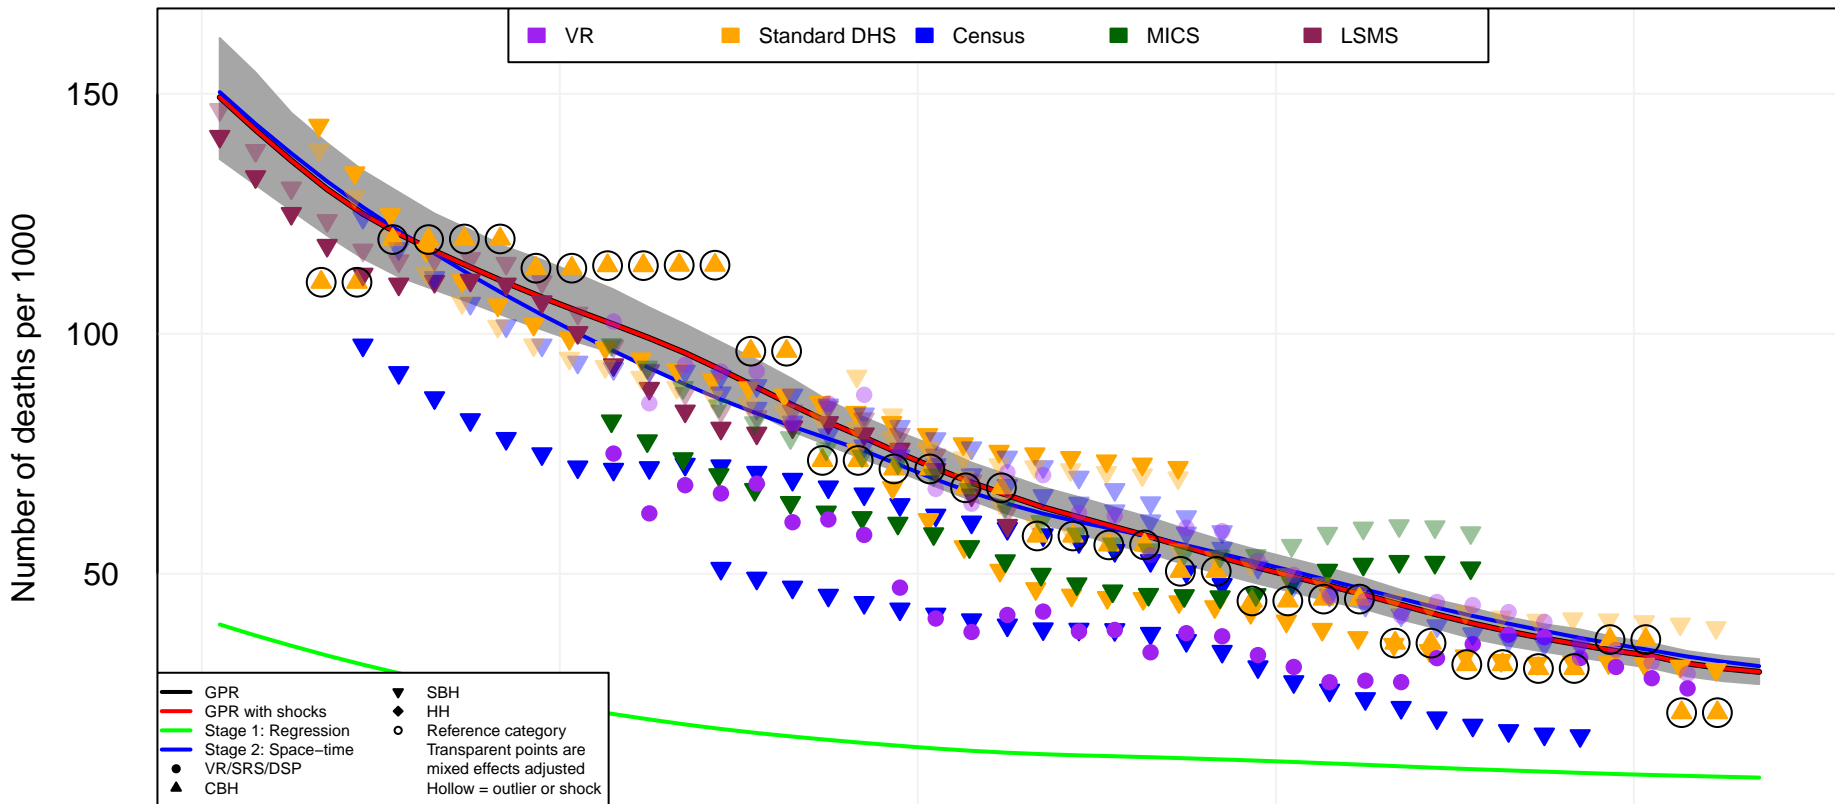

1970

1980

1990

2000

2010

Year

# Asia, Central Mongolia (MNG)

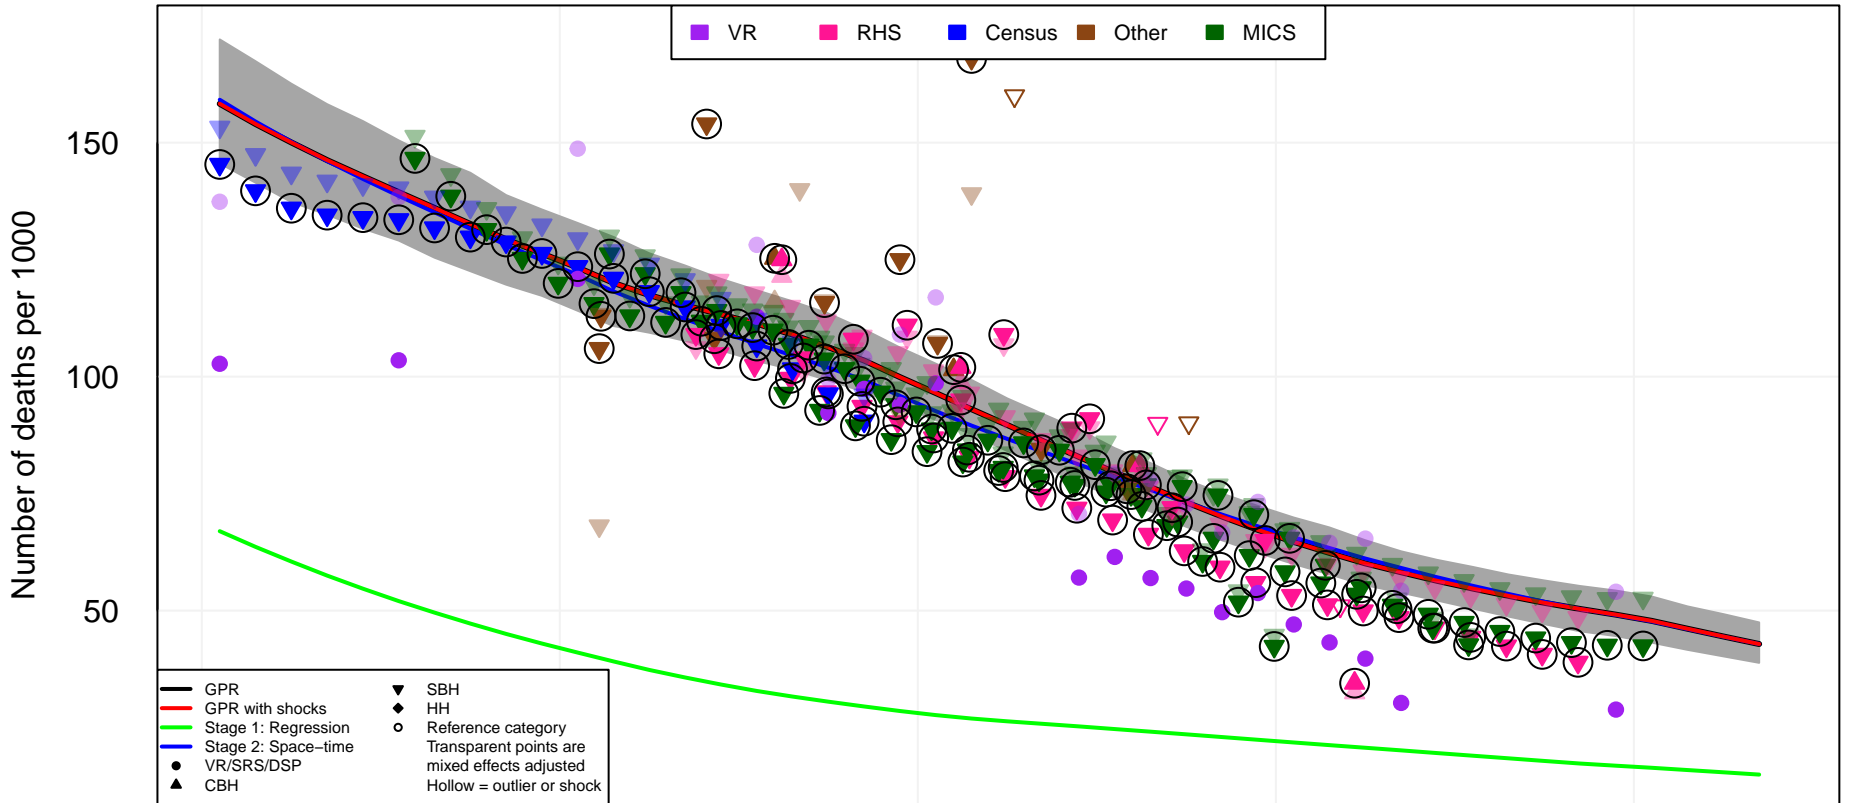

1970

1980

1990

2000

2010

Year

# Asia, Central Tajikistan (TJK)

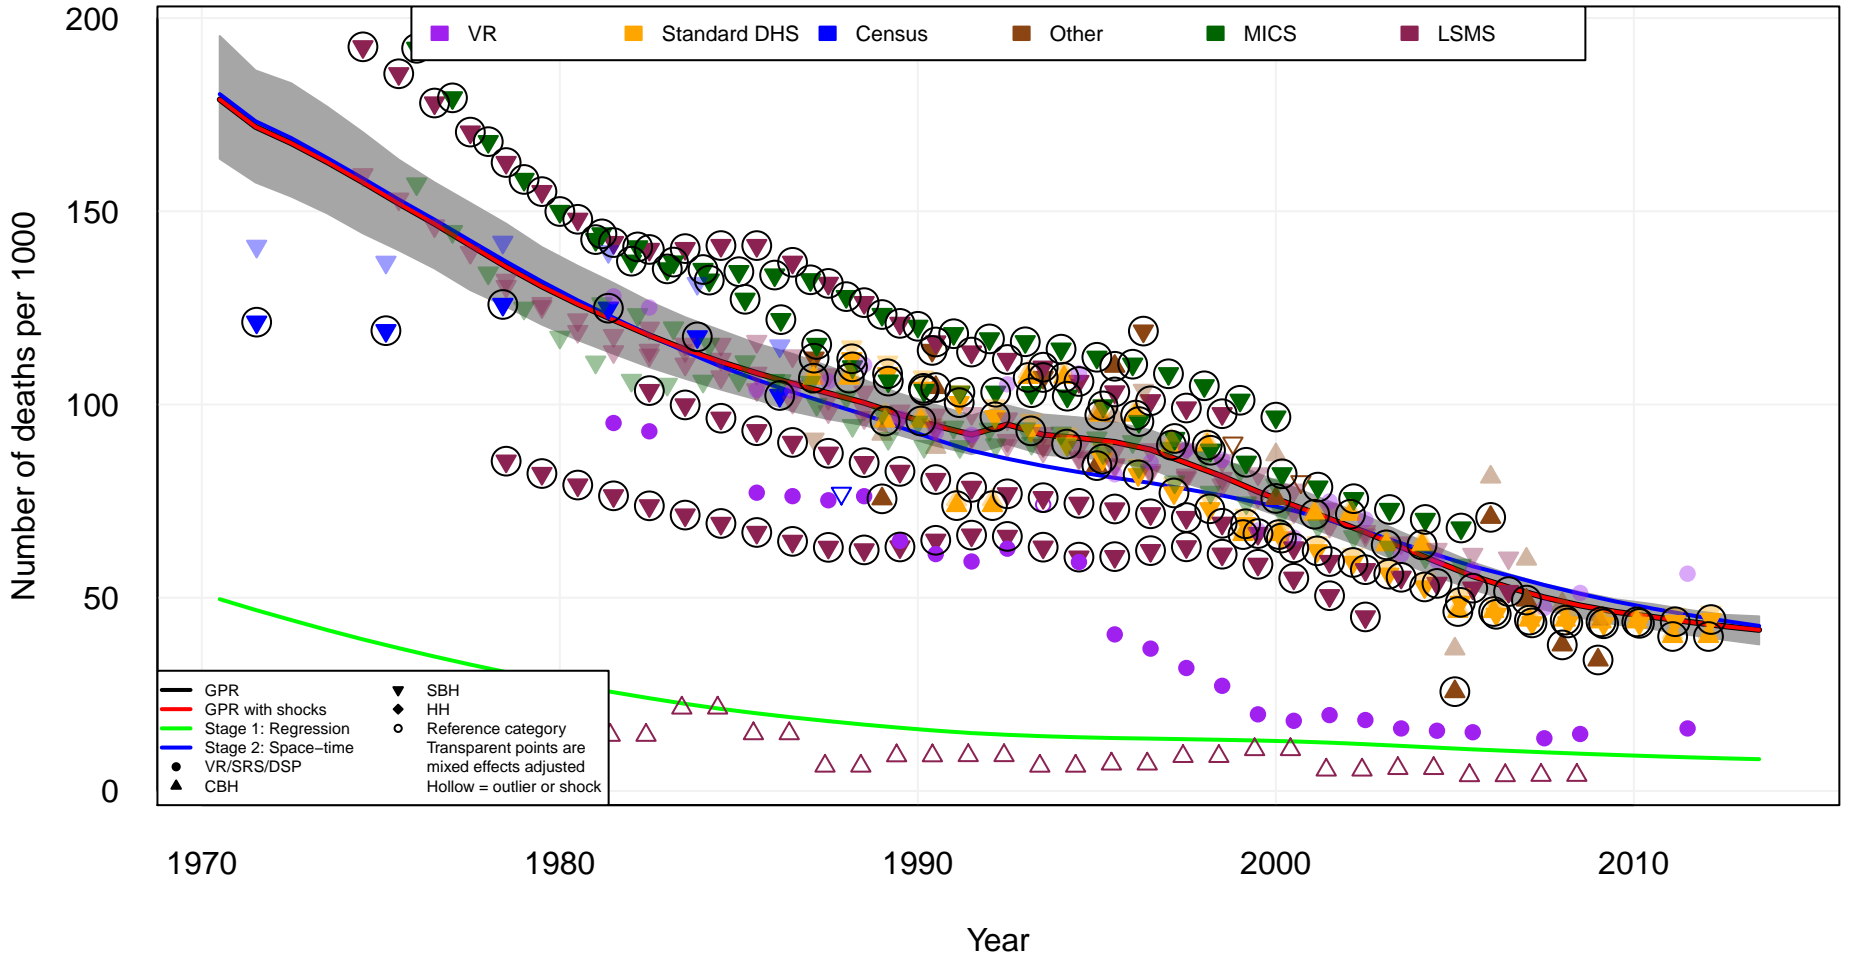





# Asia, Central Uzbekistan (UZB)

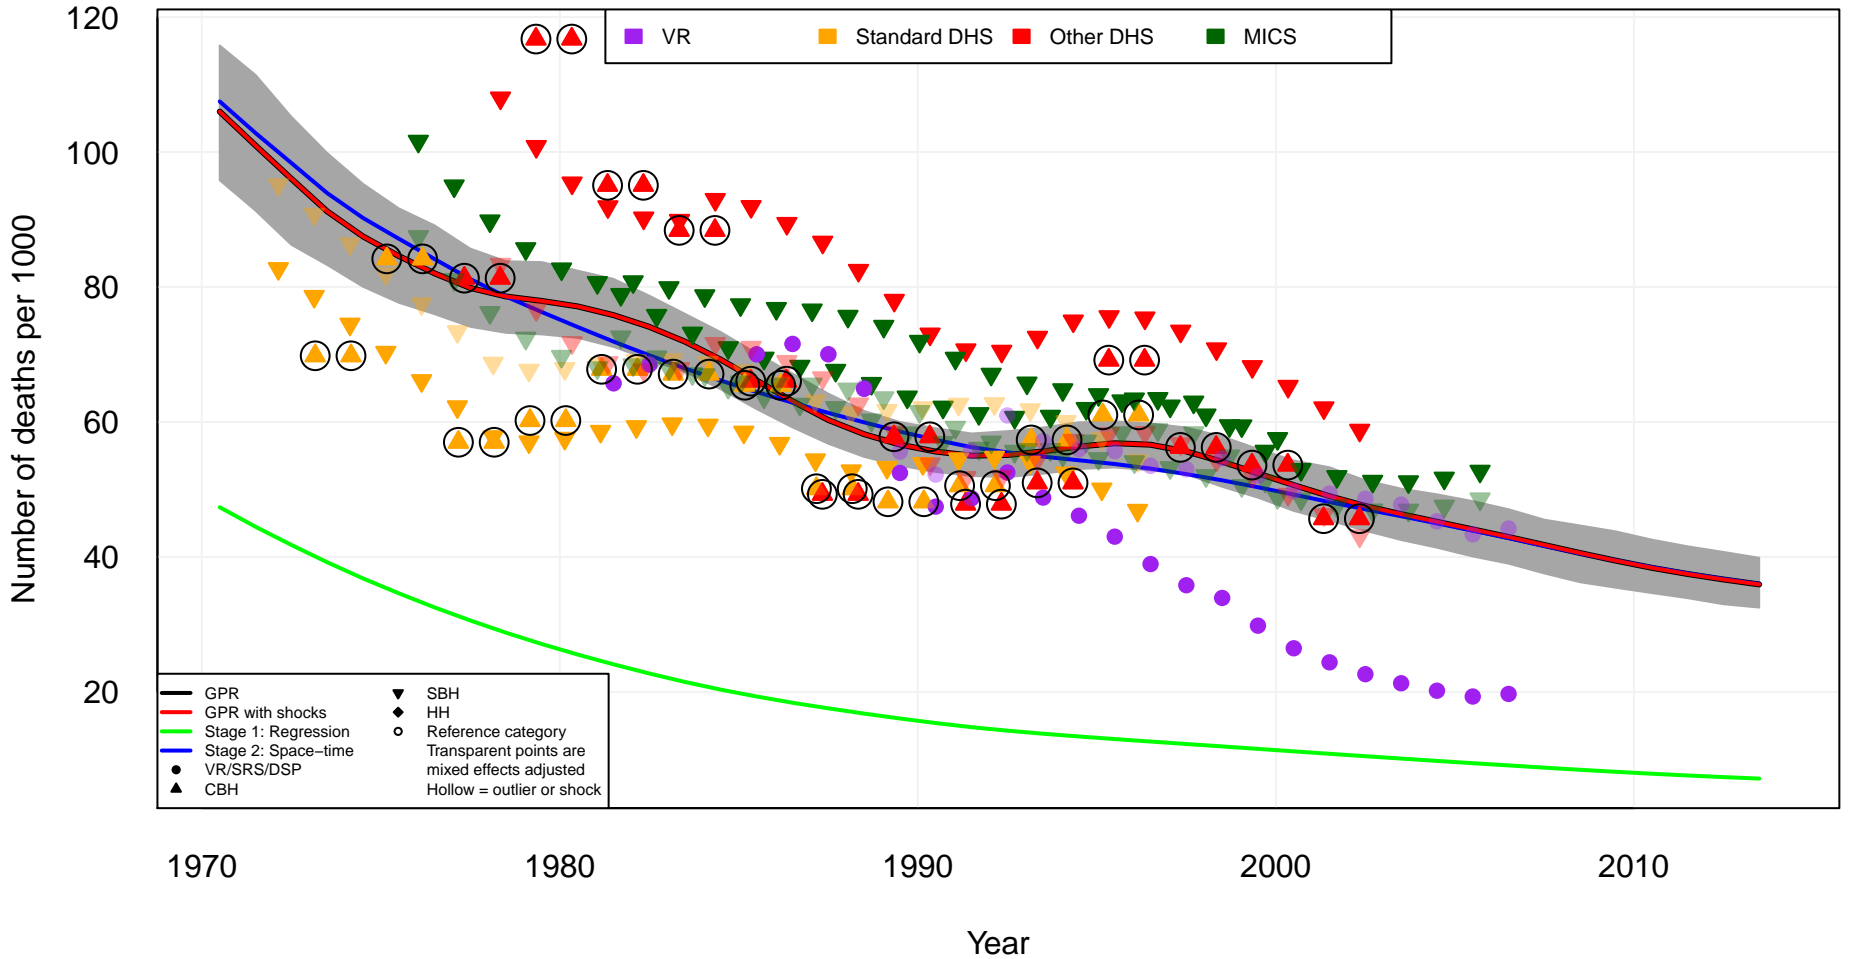

# Asia, East China (CHN)

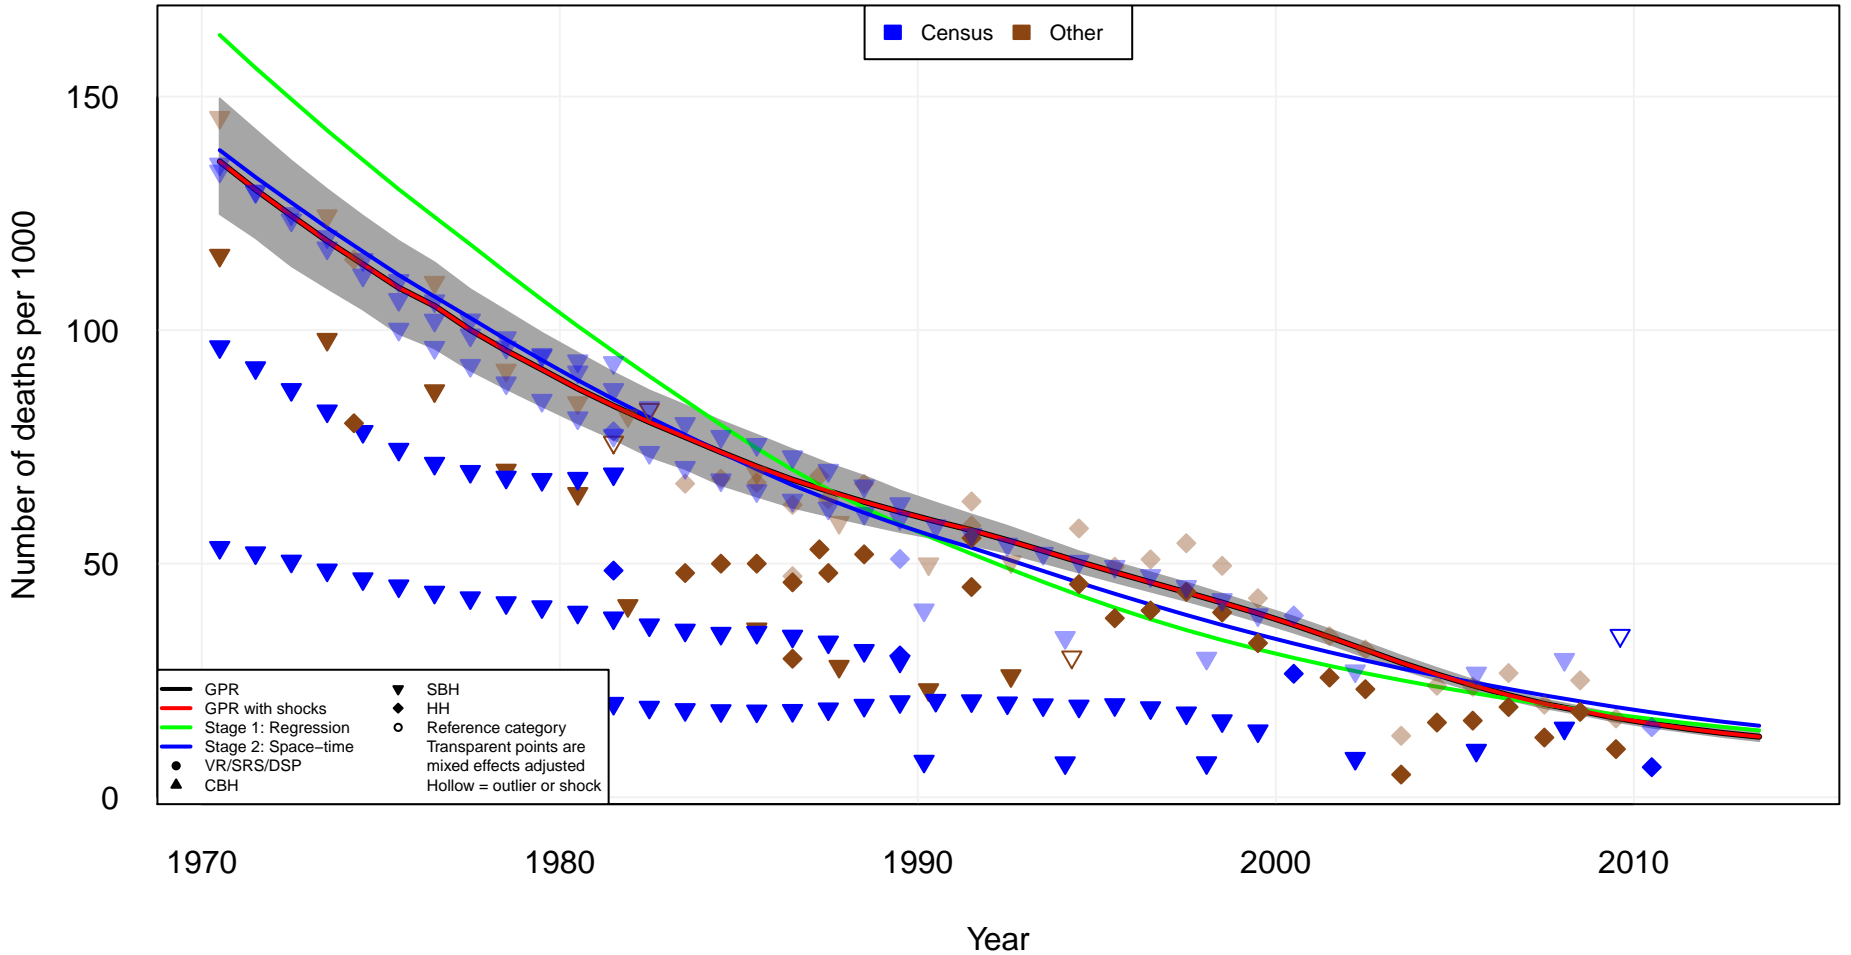

# Asia, East North Korea (PRK)

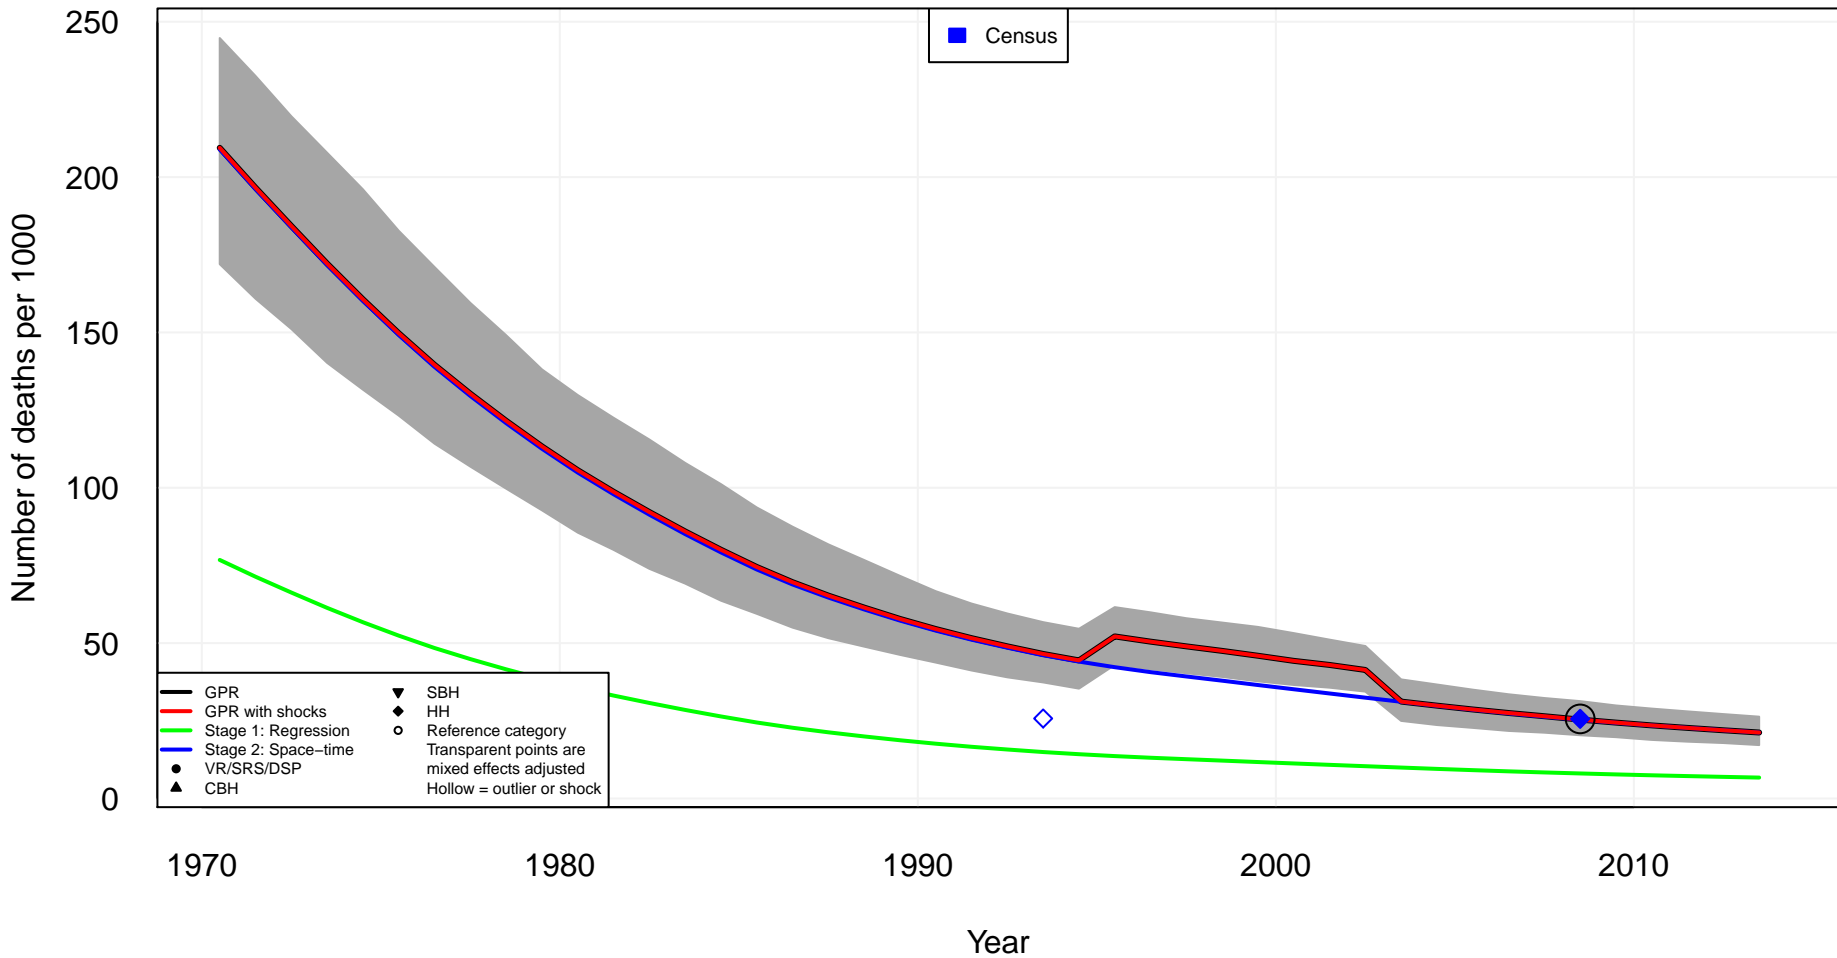

# Asia, East Taiwan (TWN)

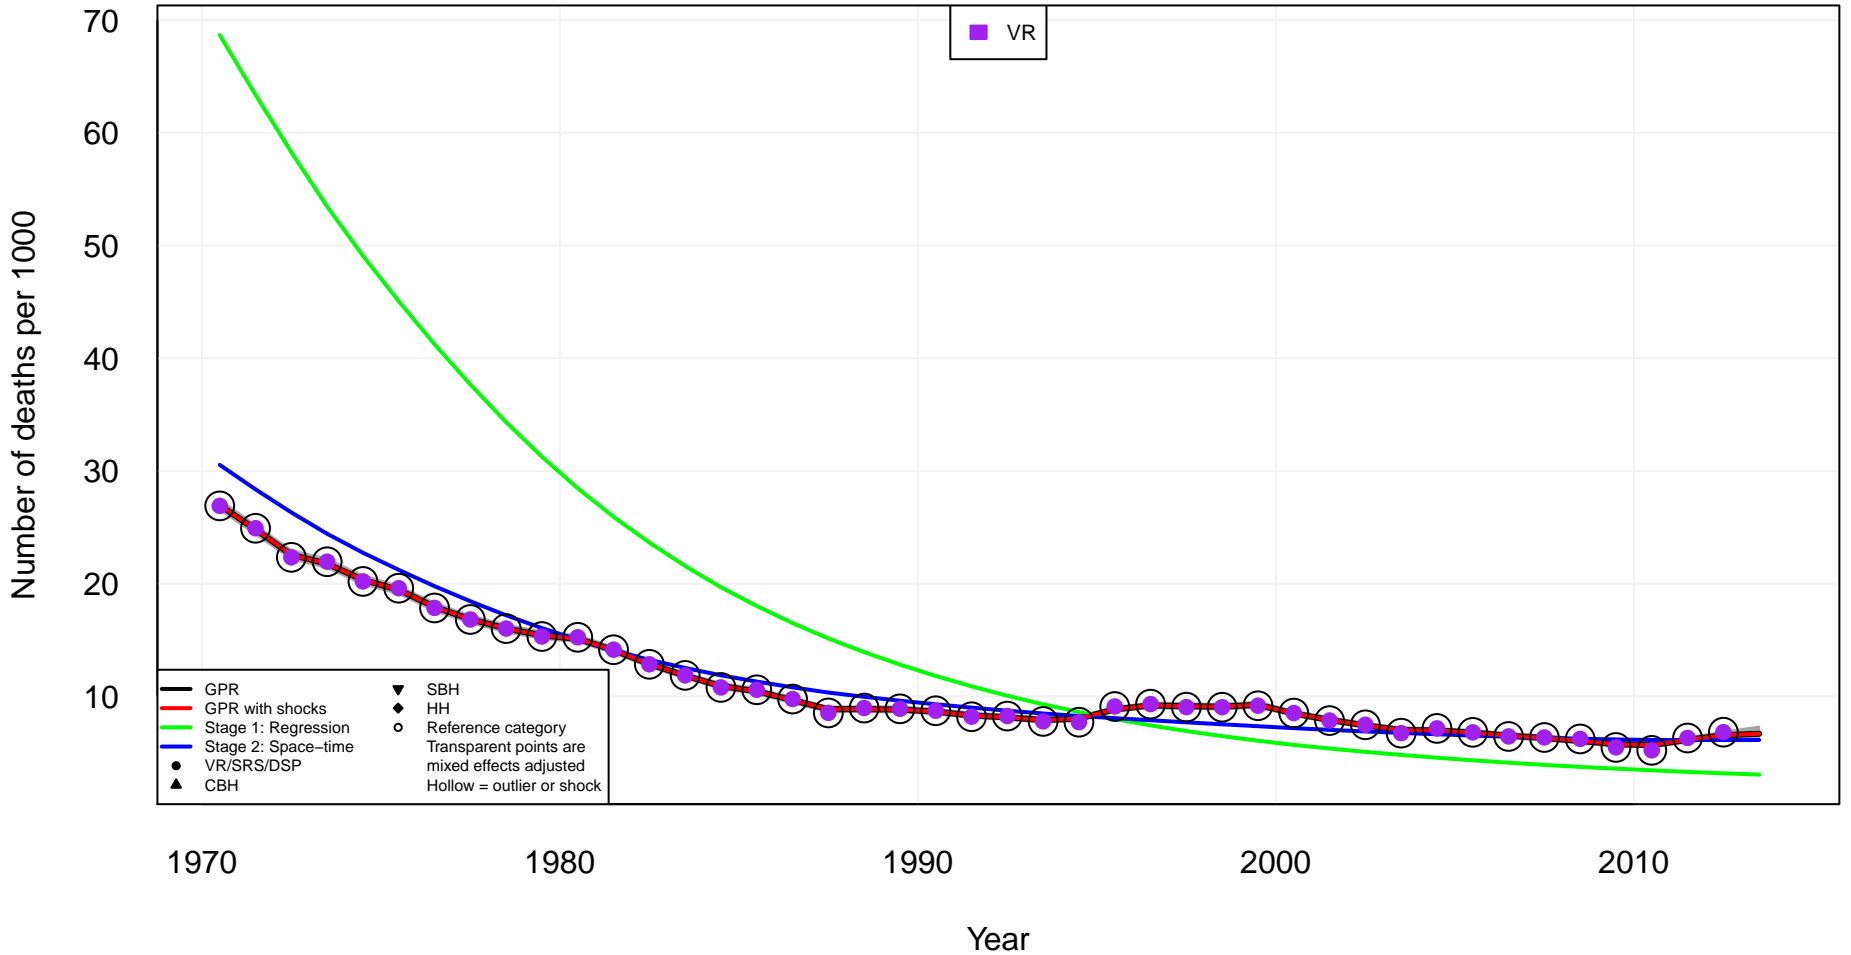

# Asia, South Bangladesh (BGD)

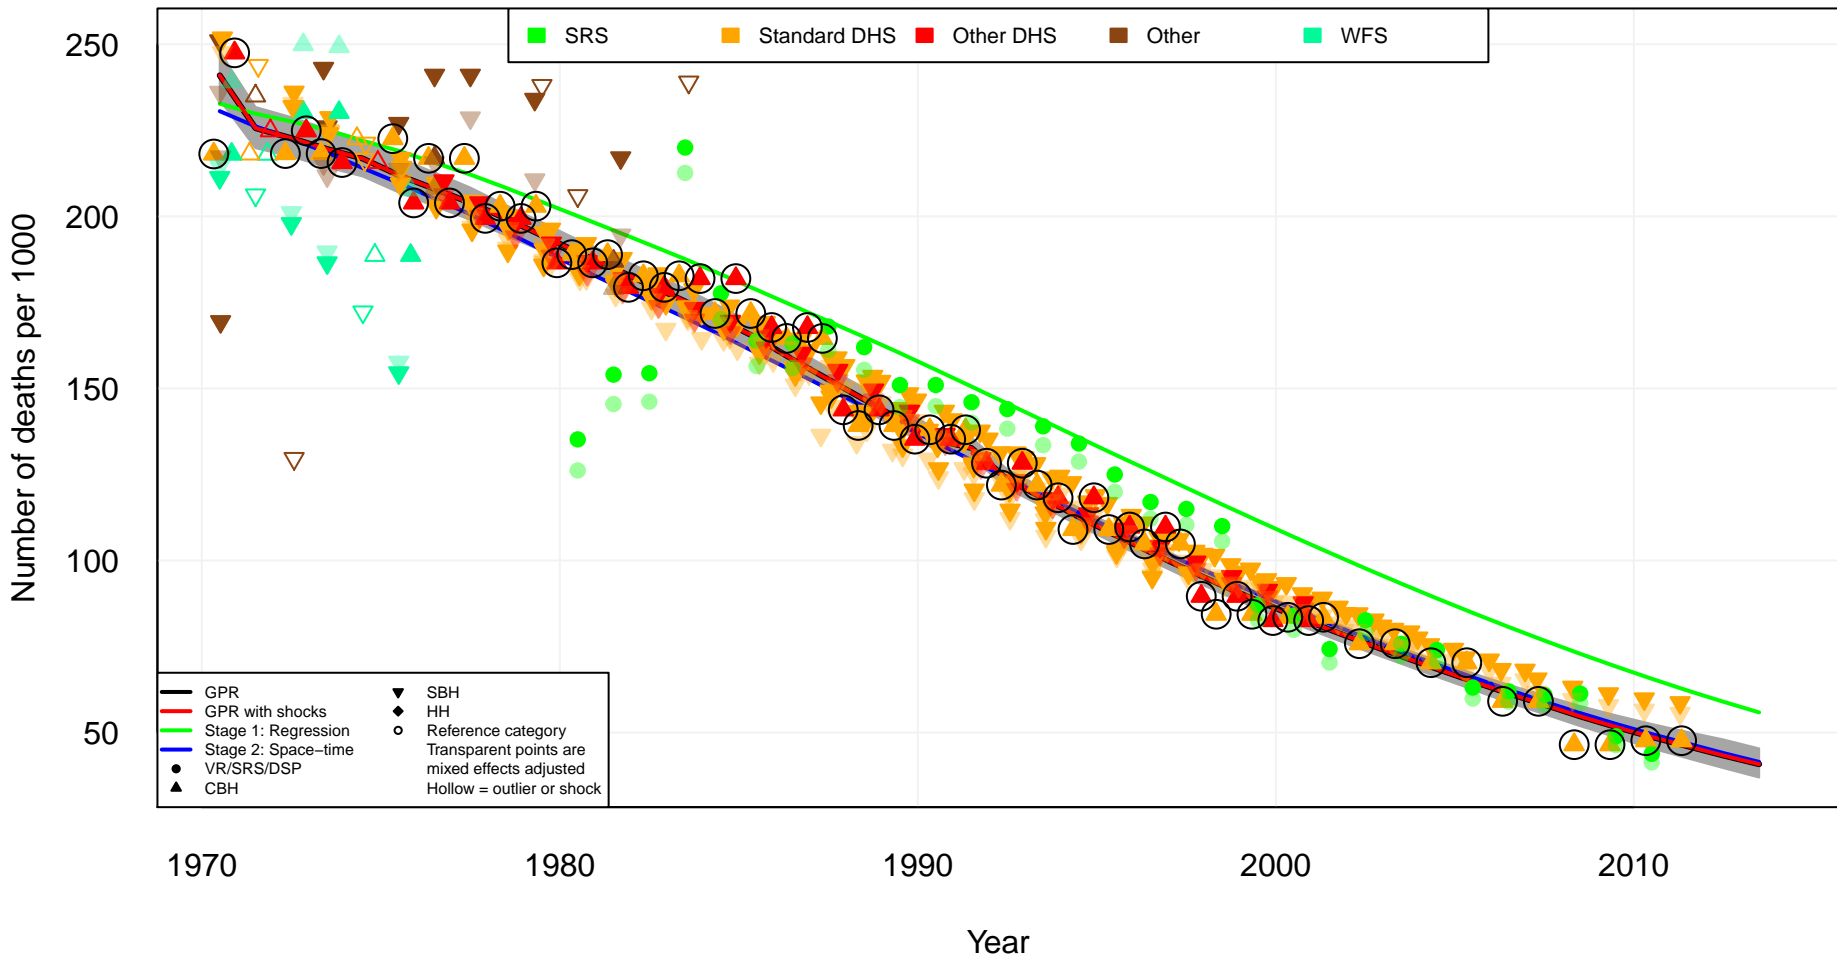

# Asia, South Bhutan (BTN)

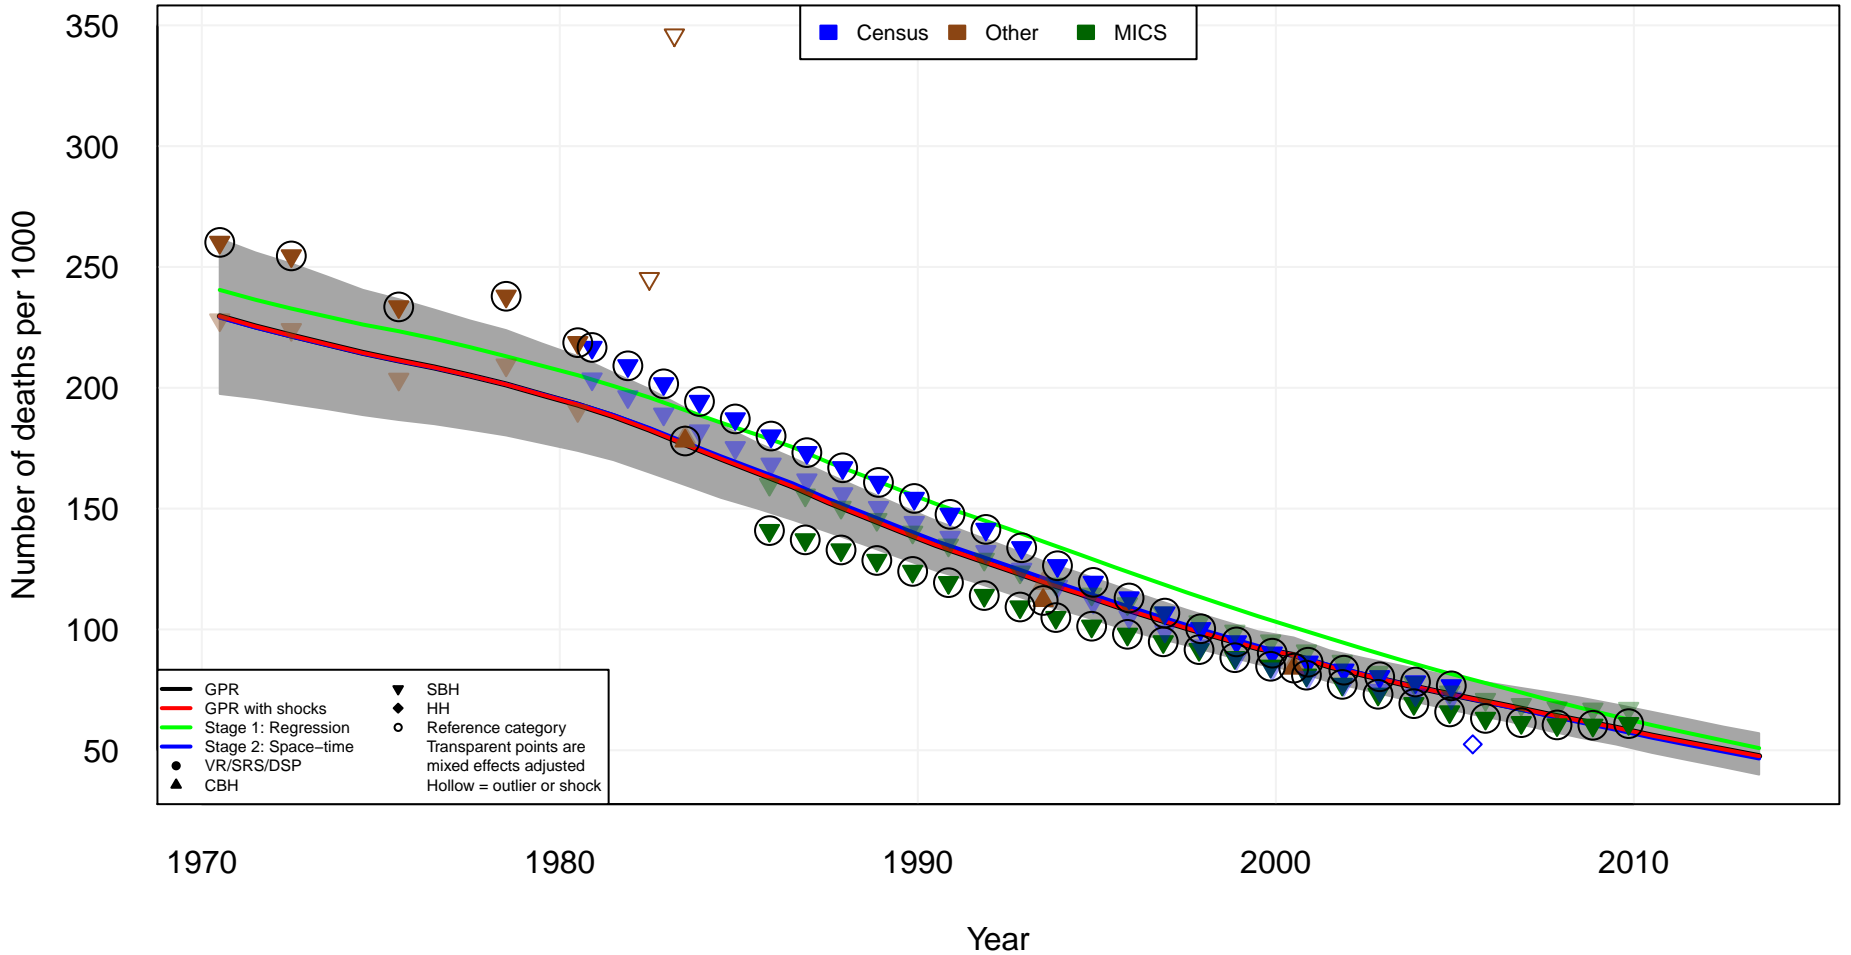

# Asia, South India (IND)

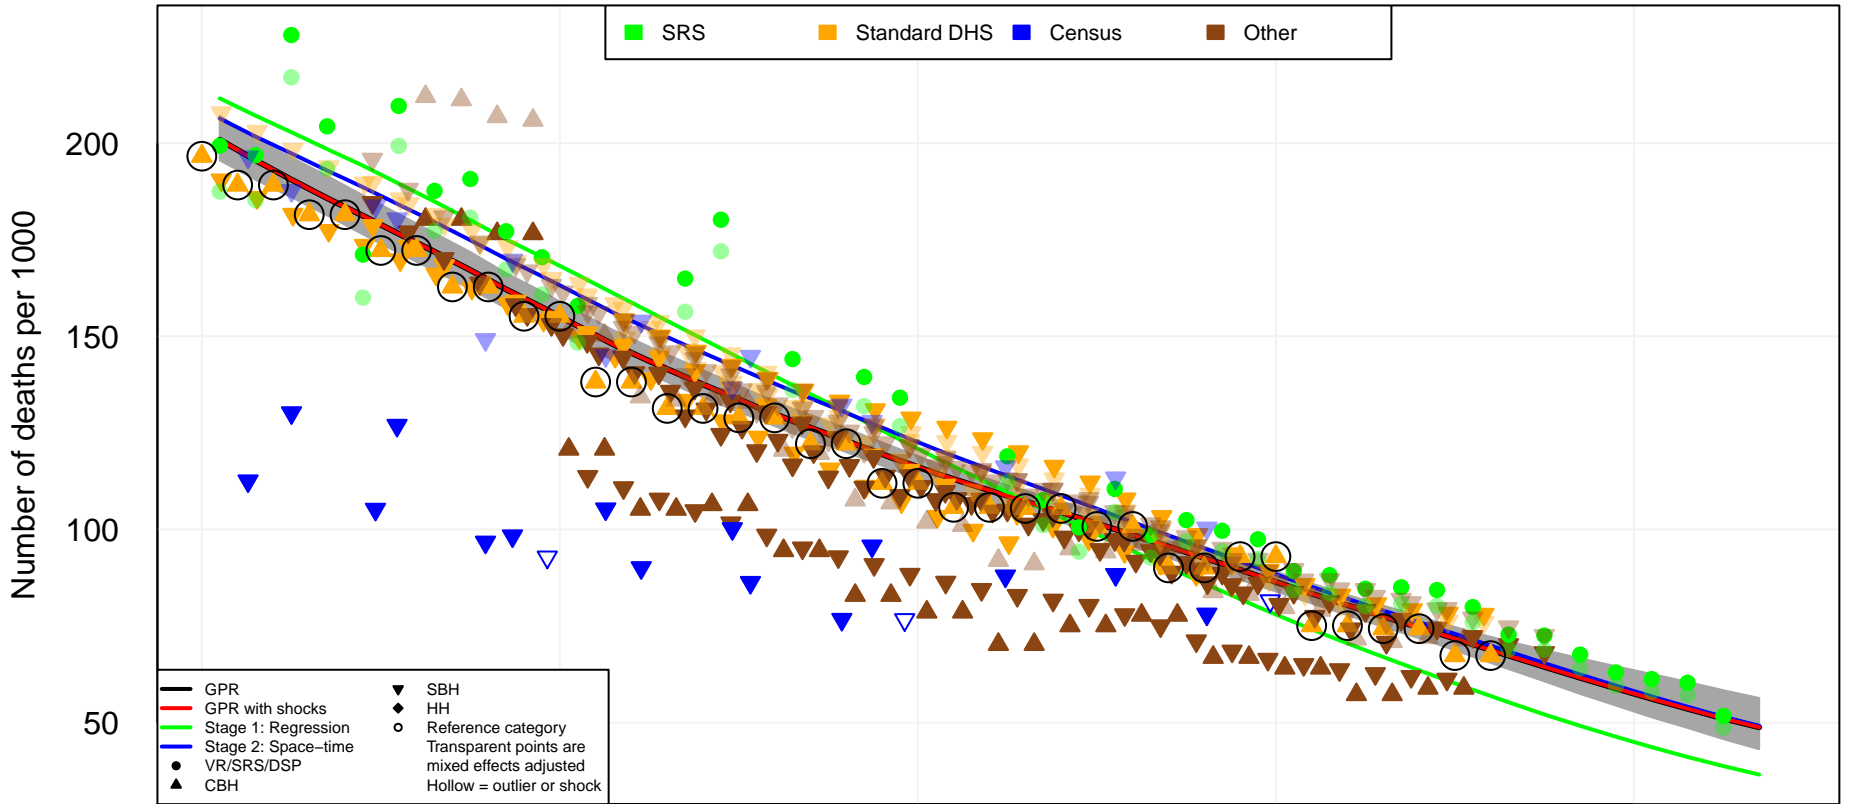

1970

1980

1990

2000

2010

Year

# Asia, South Nepal (NPL)

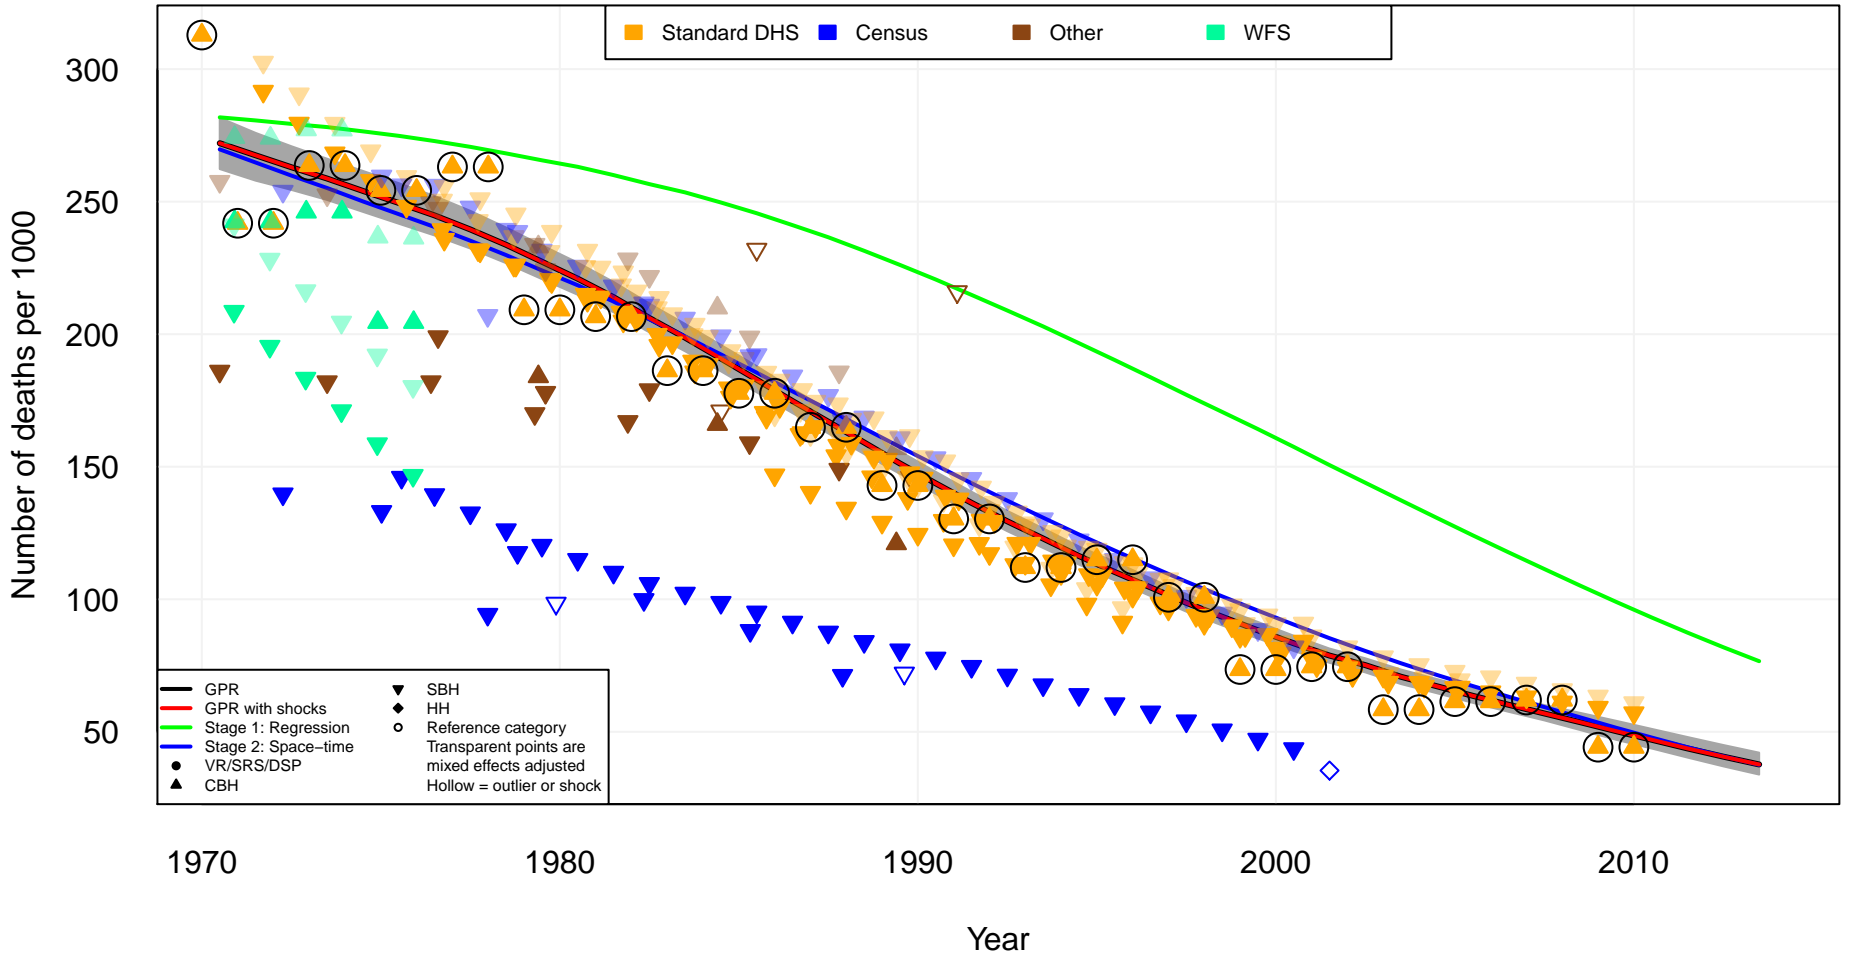



# Asia, South Pakistan (PAK)

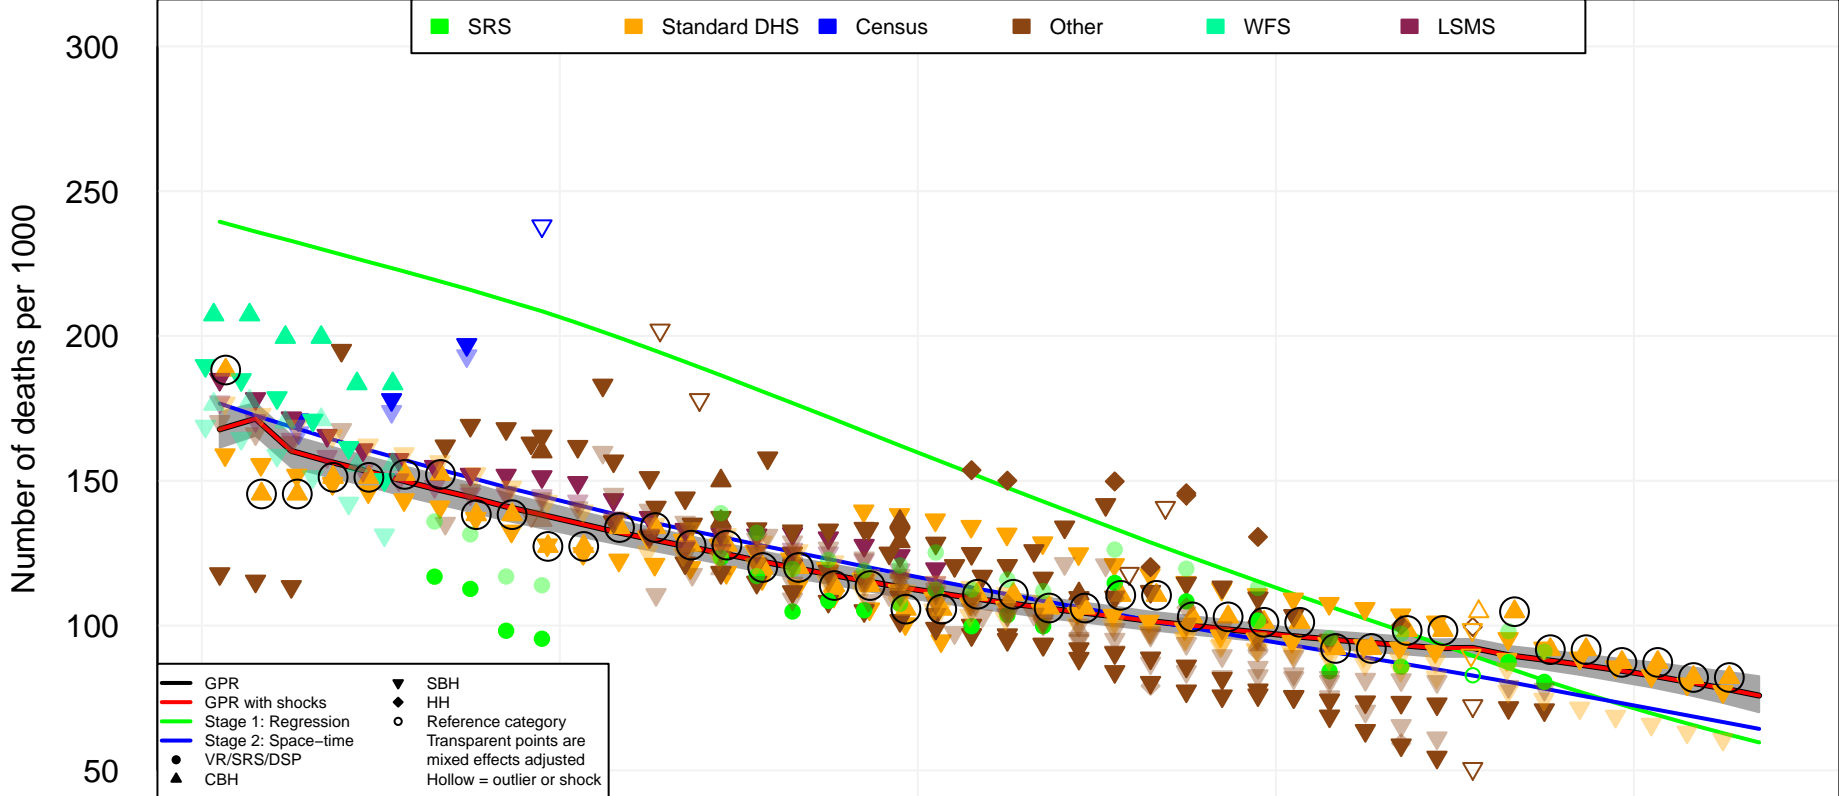

1970

1980

1990

2000

2010

Year

# Asia, Southeast Indonesia (IDN)

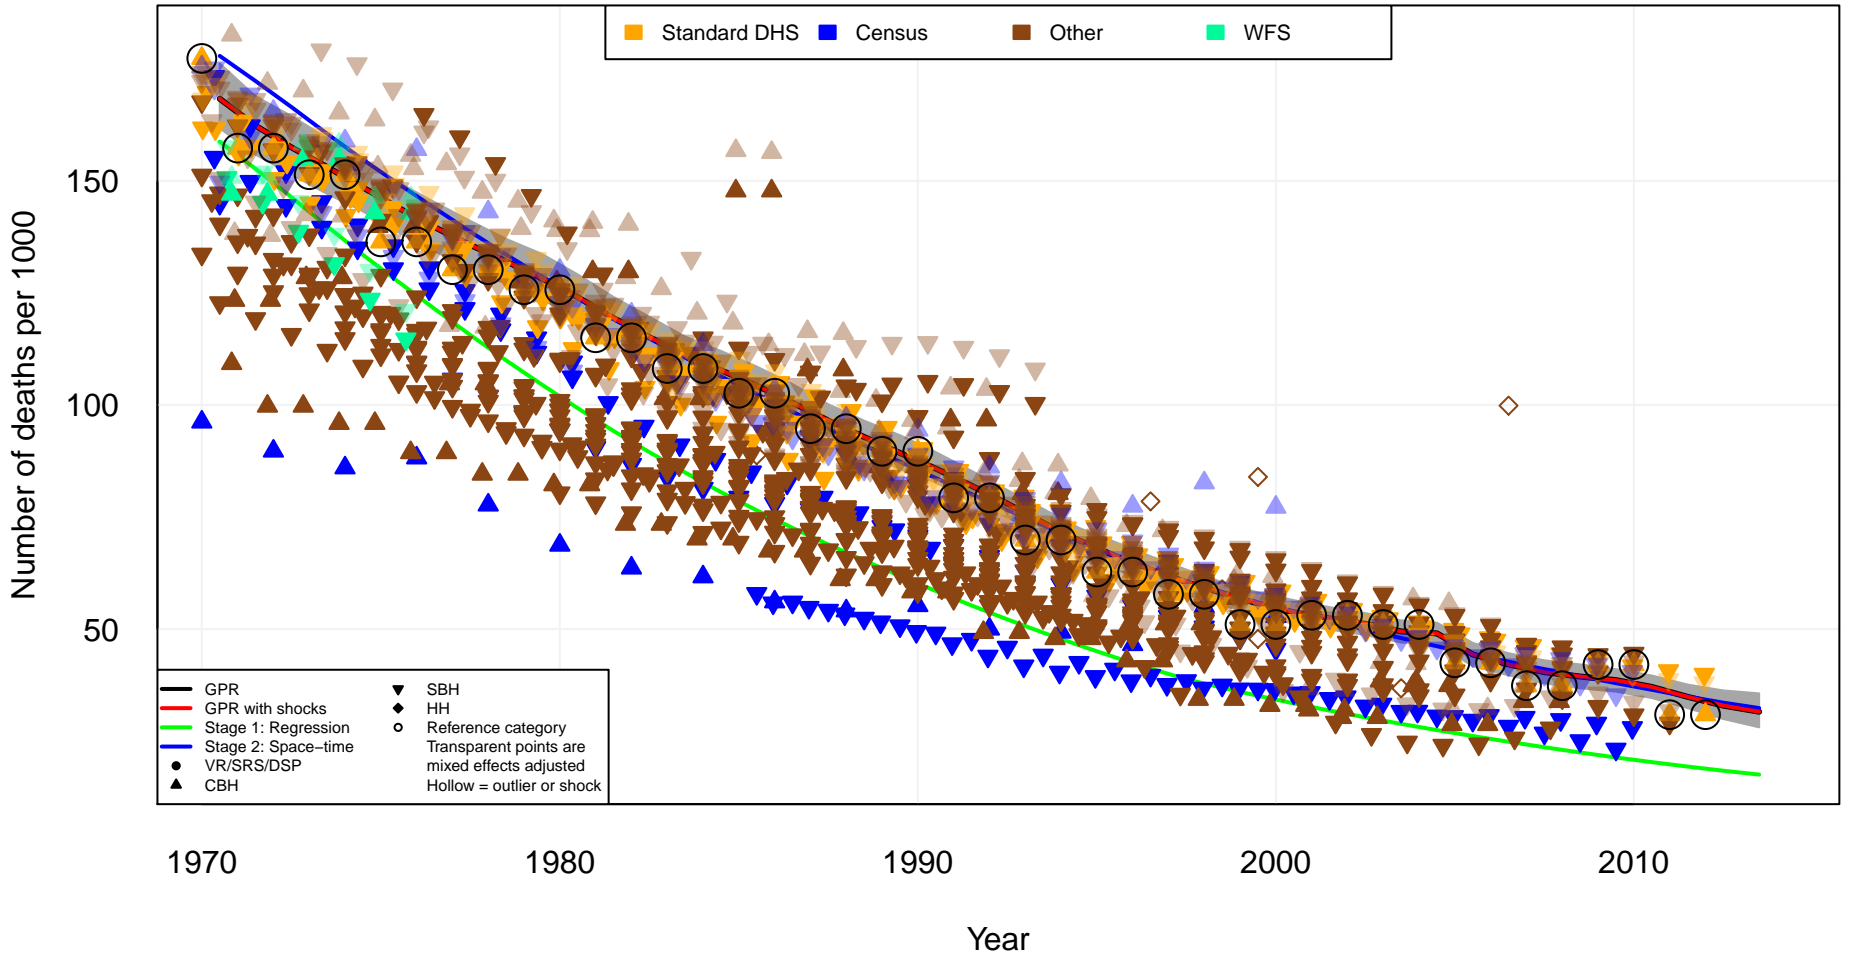

# Asia, Southeast Cambodia (KHM)

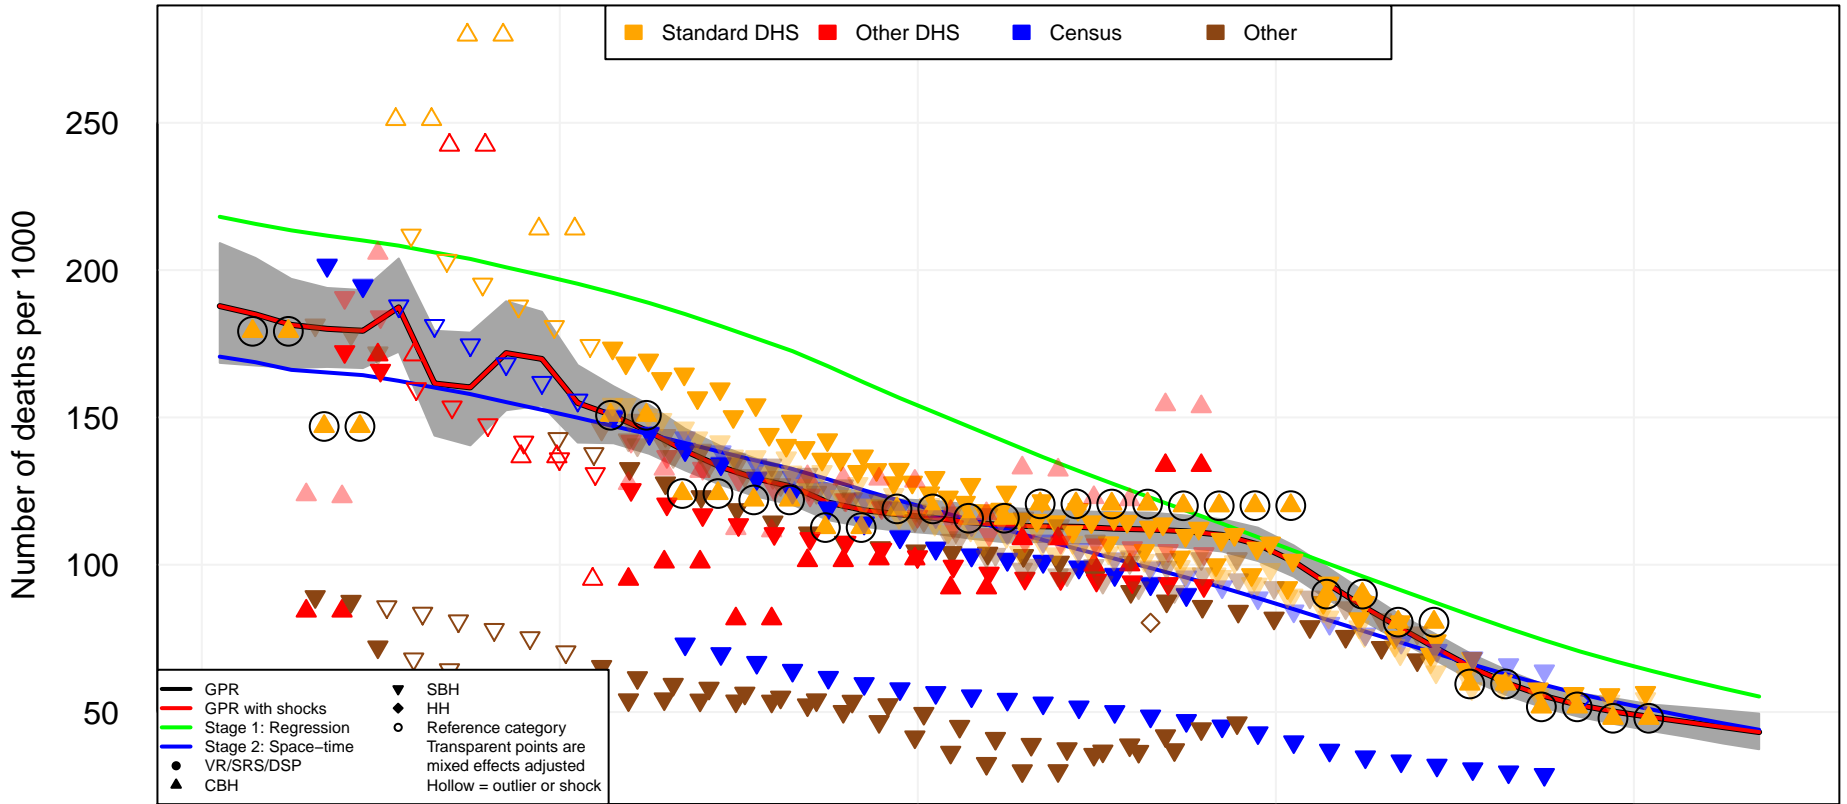

1970

1980

1990

2000

2010

Year

# Asia, Southeast Laos (LAO)

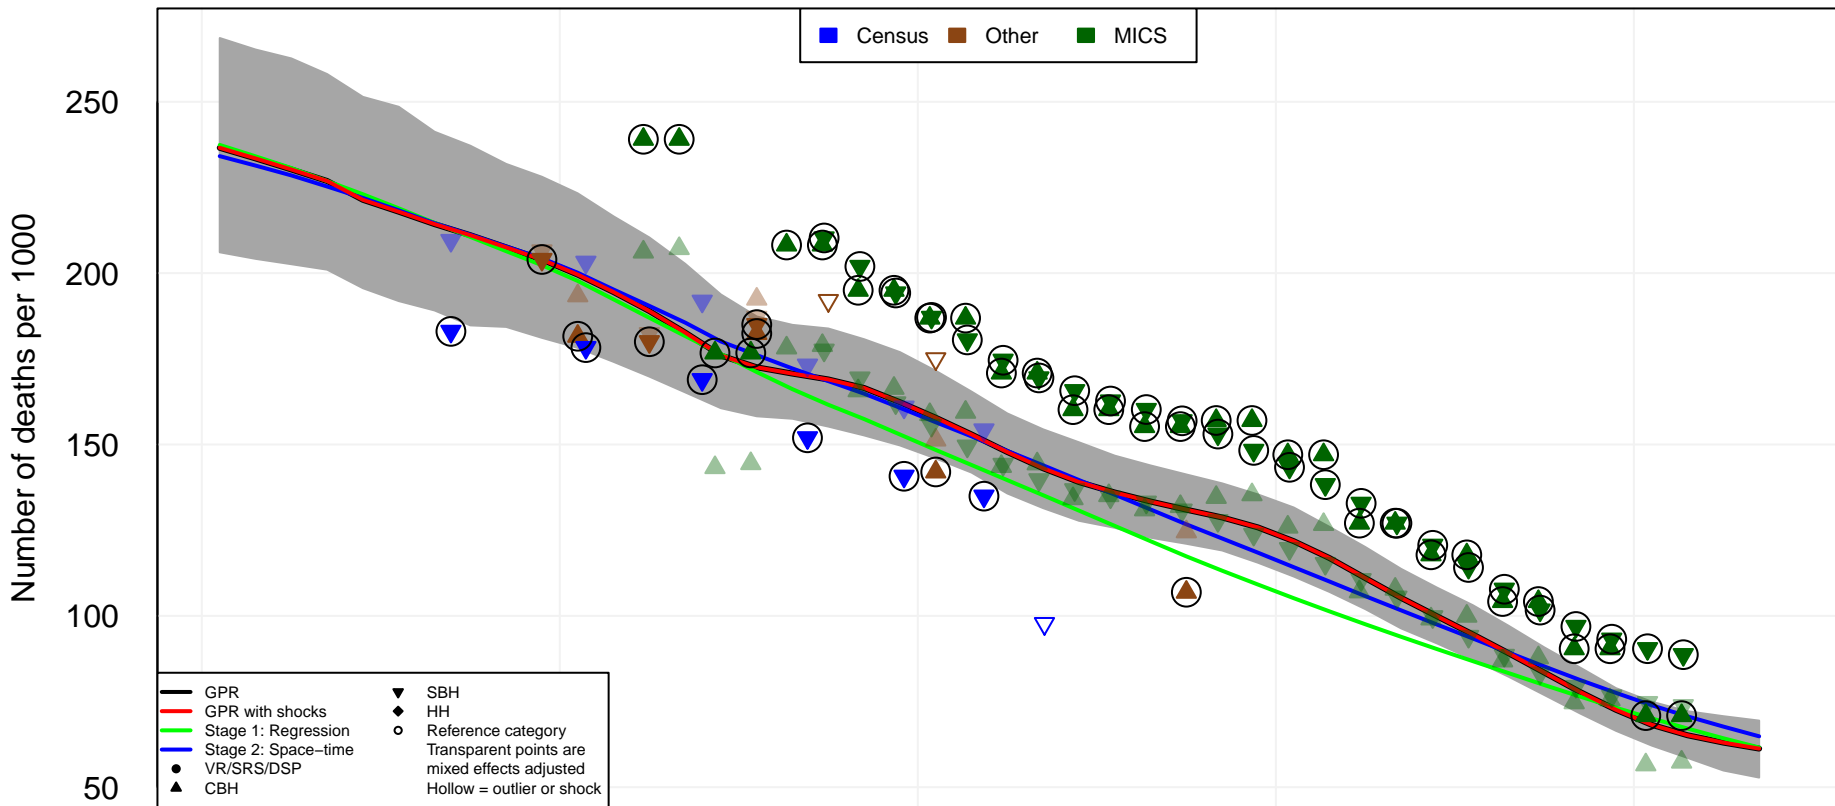

1970

1980

1990

2000

2010

Year

# Asia, Southeast Sri Lanka (LKA)

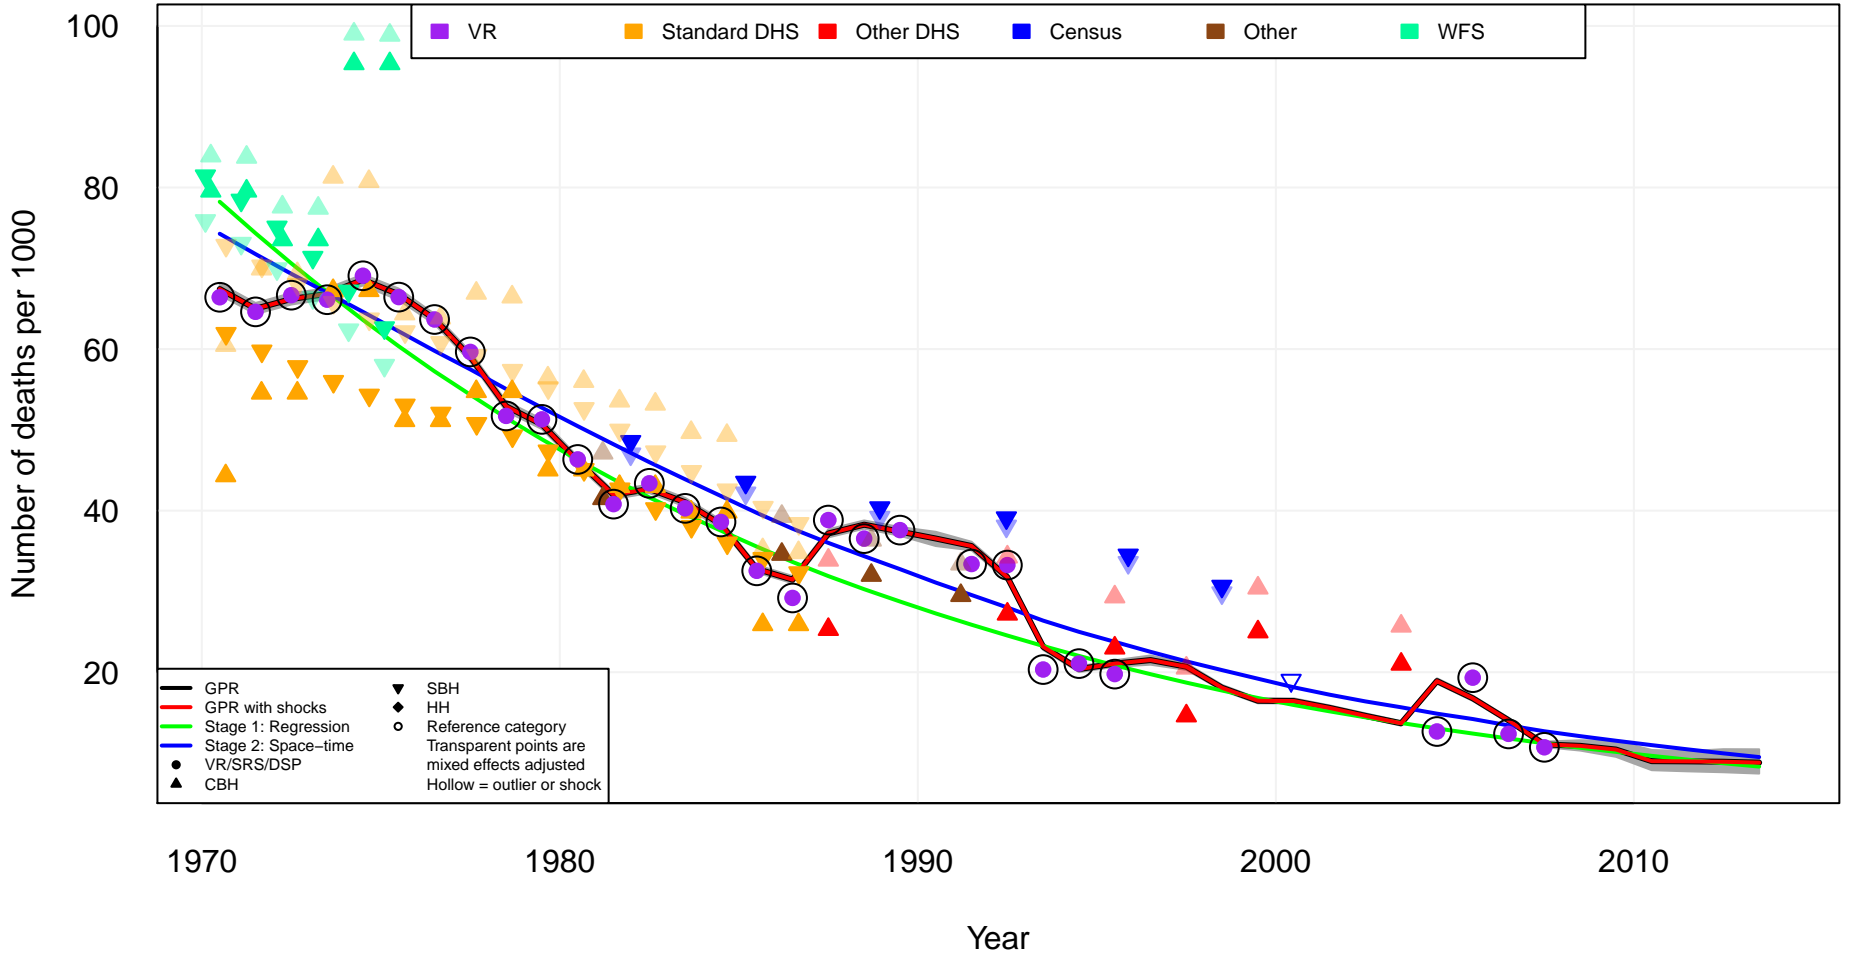

# Asia, Southeast Maldives (MDV)

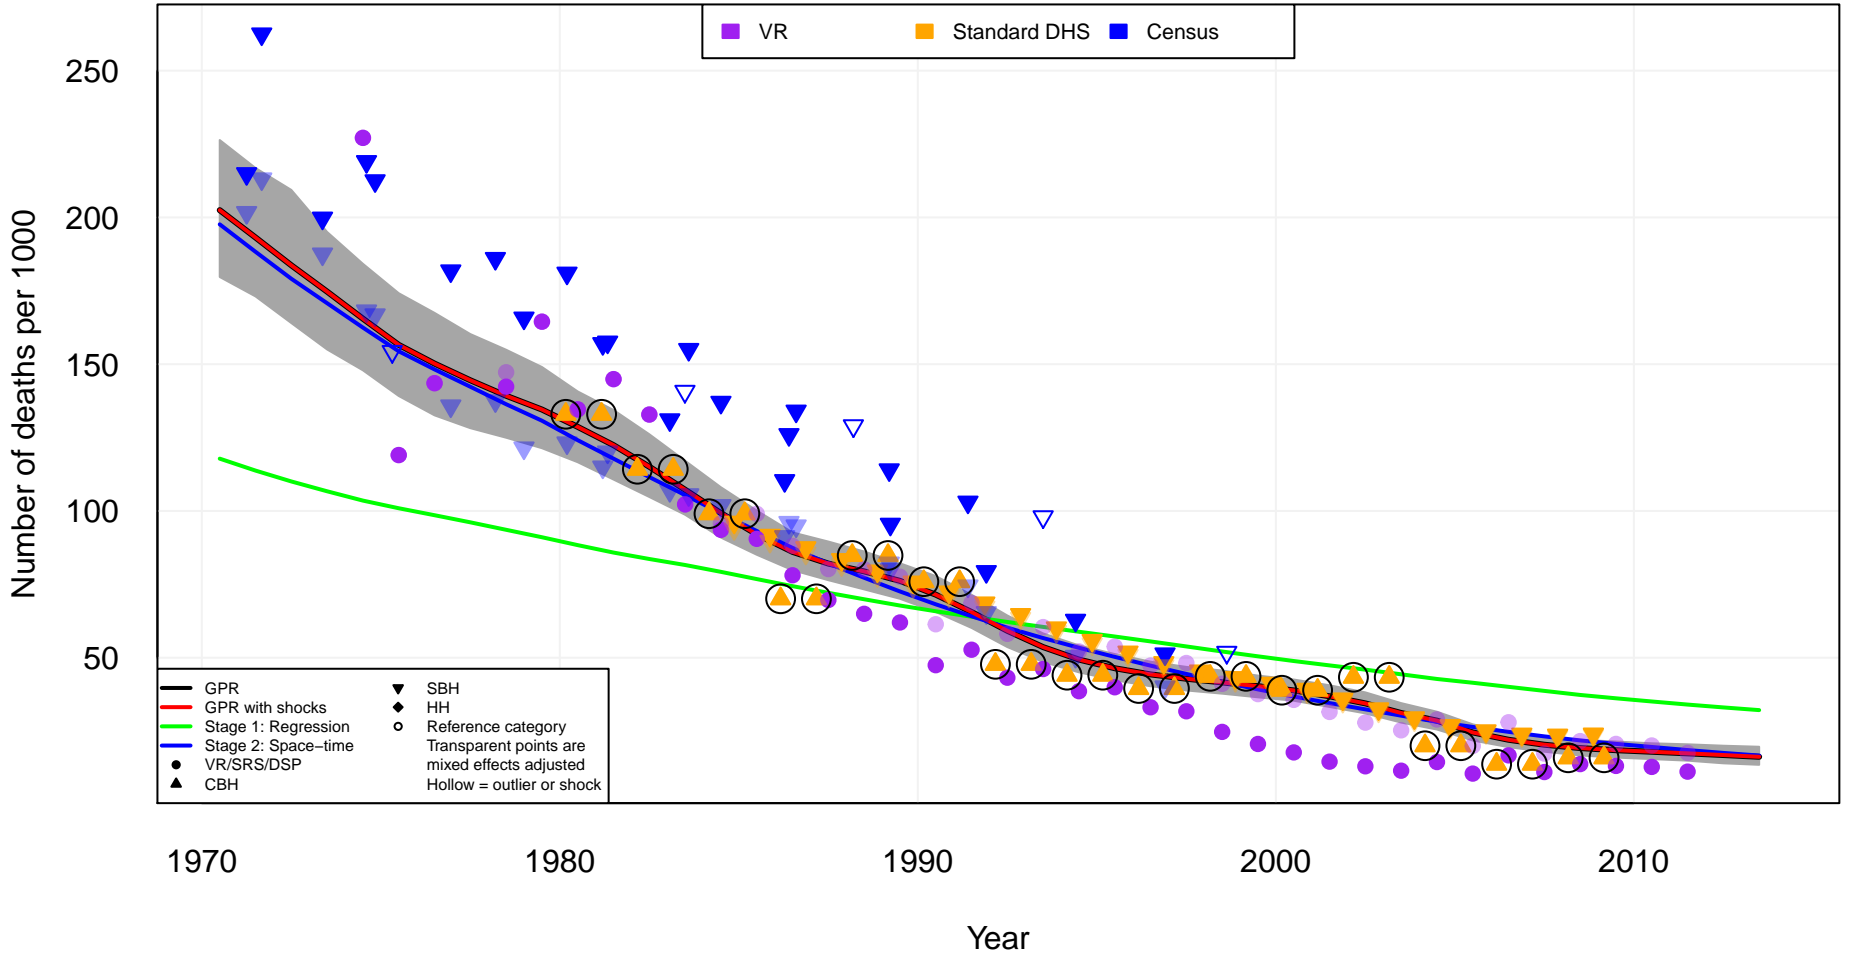

# Asia, Southeast Myanmar (MMR)

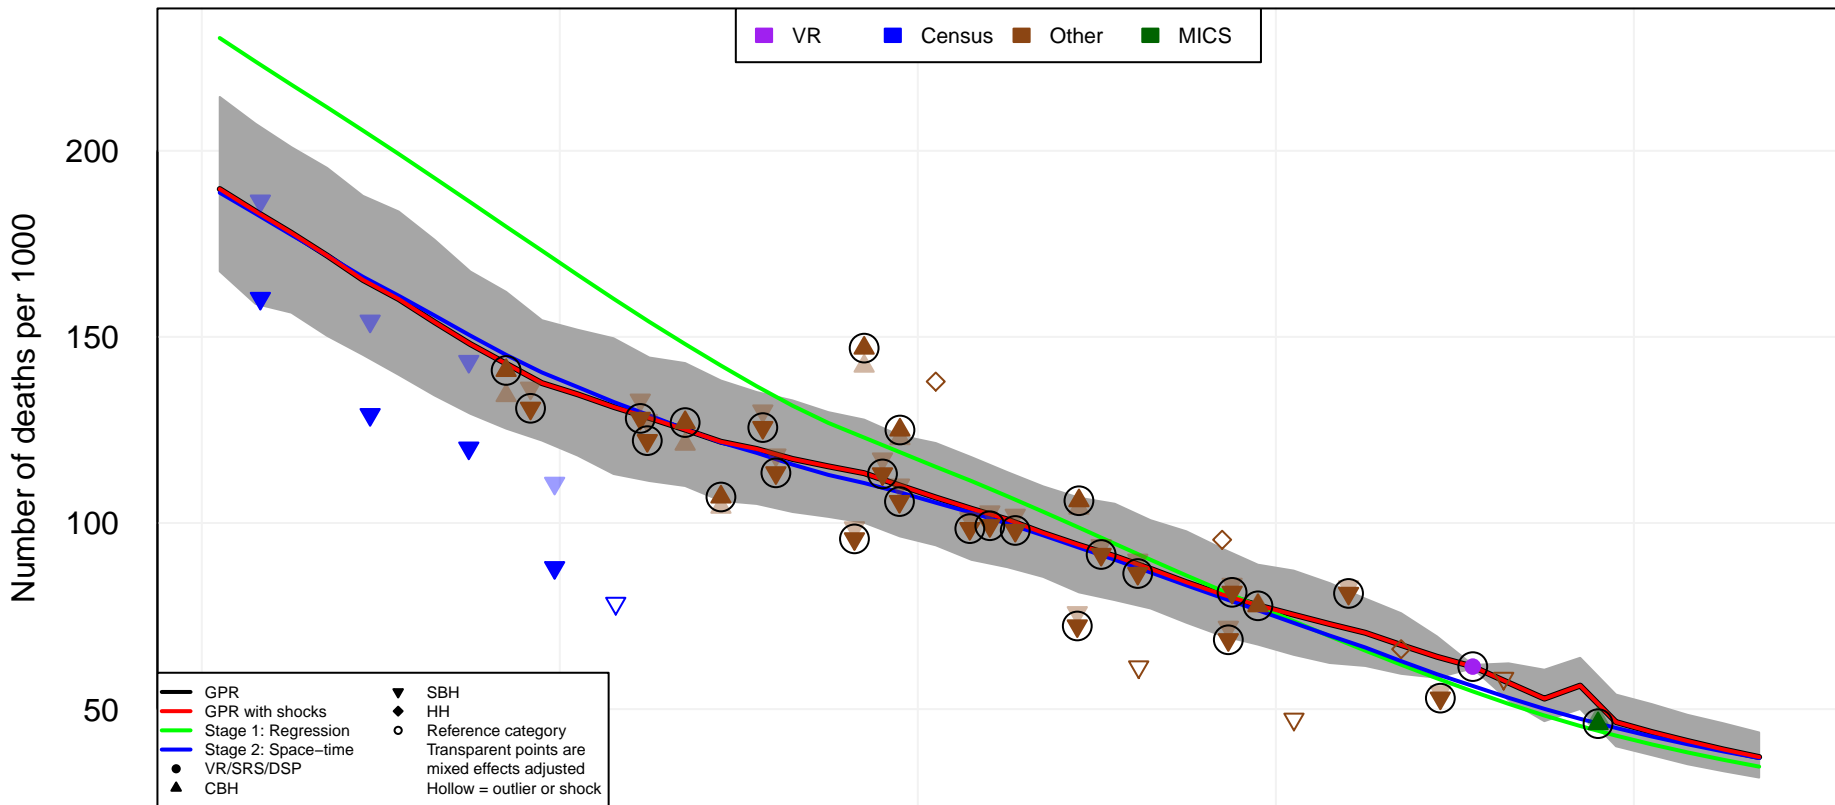

# Asia, Southeast Mauritius (MUS)

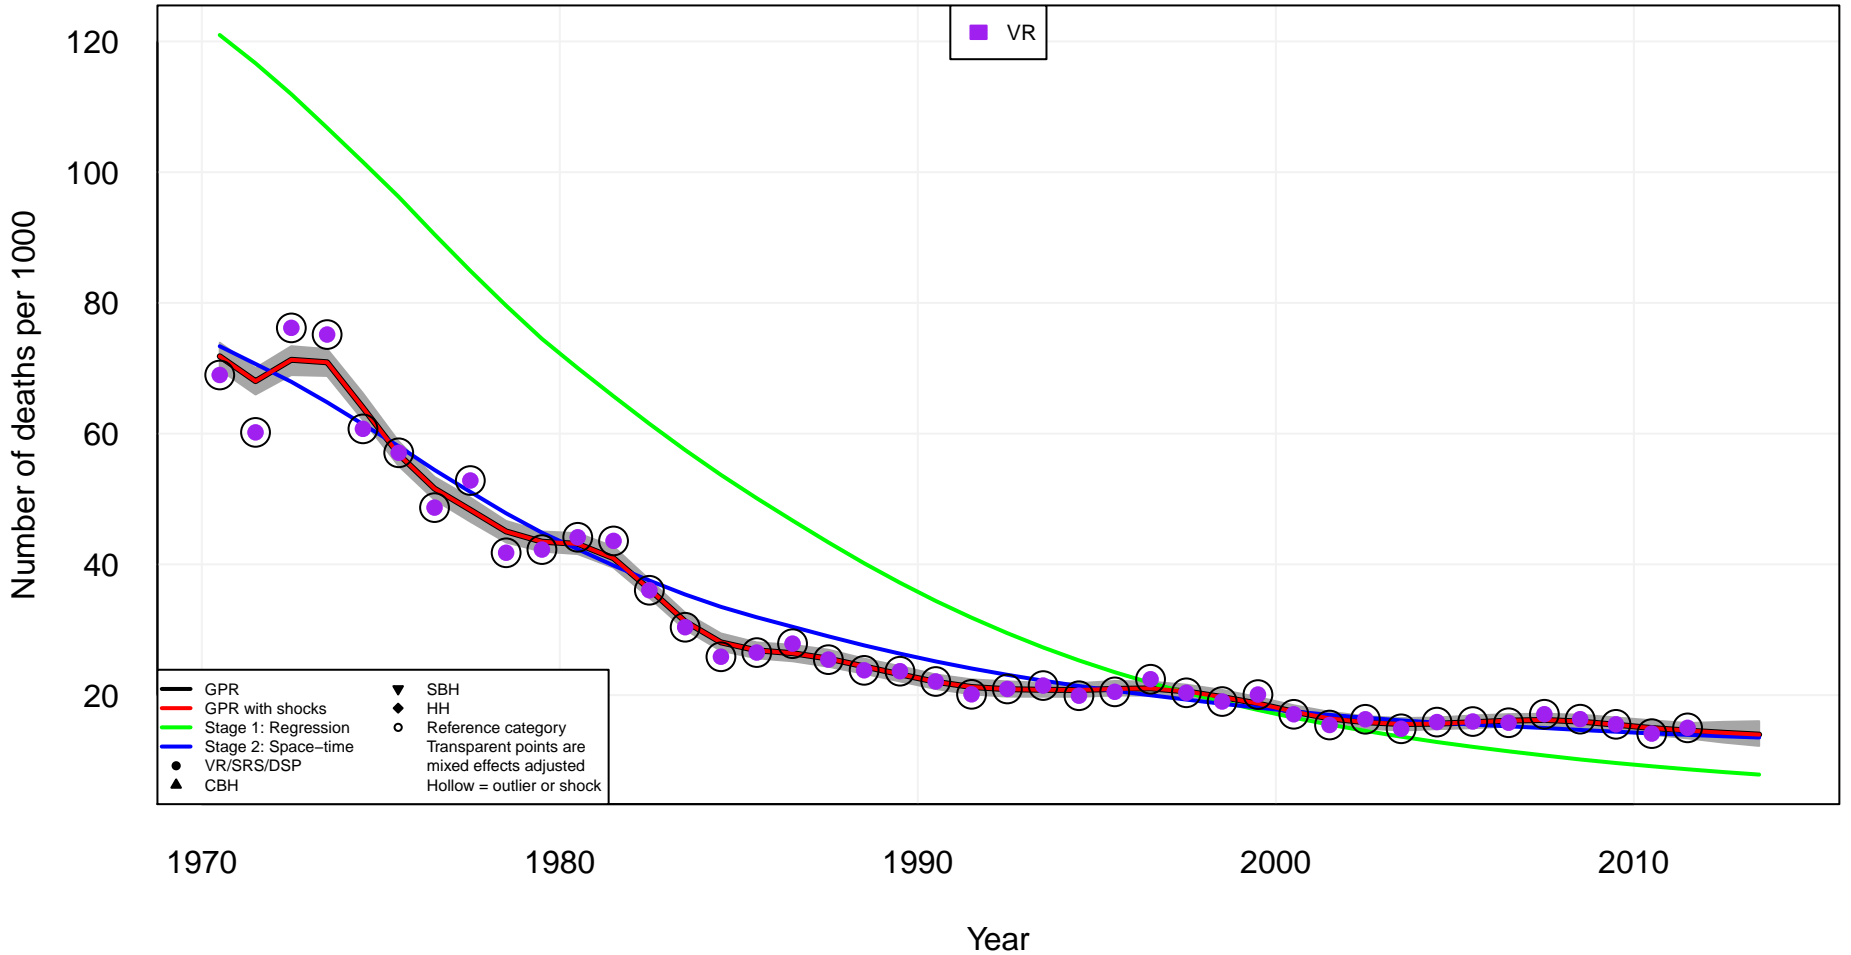



# Asia, Southeast Malaysia (MYS)

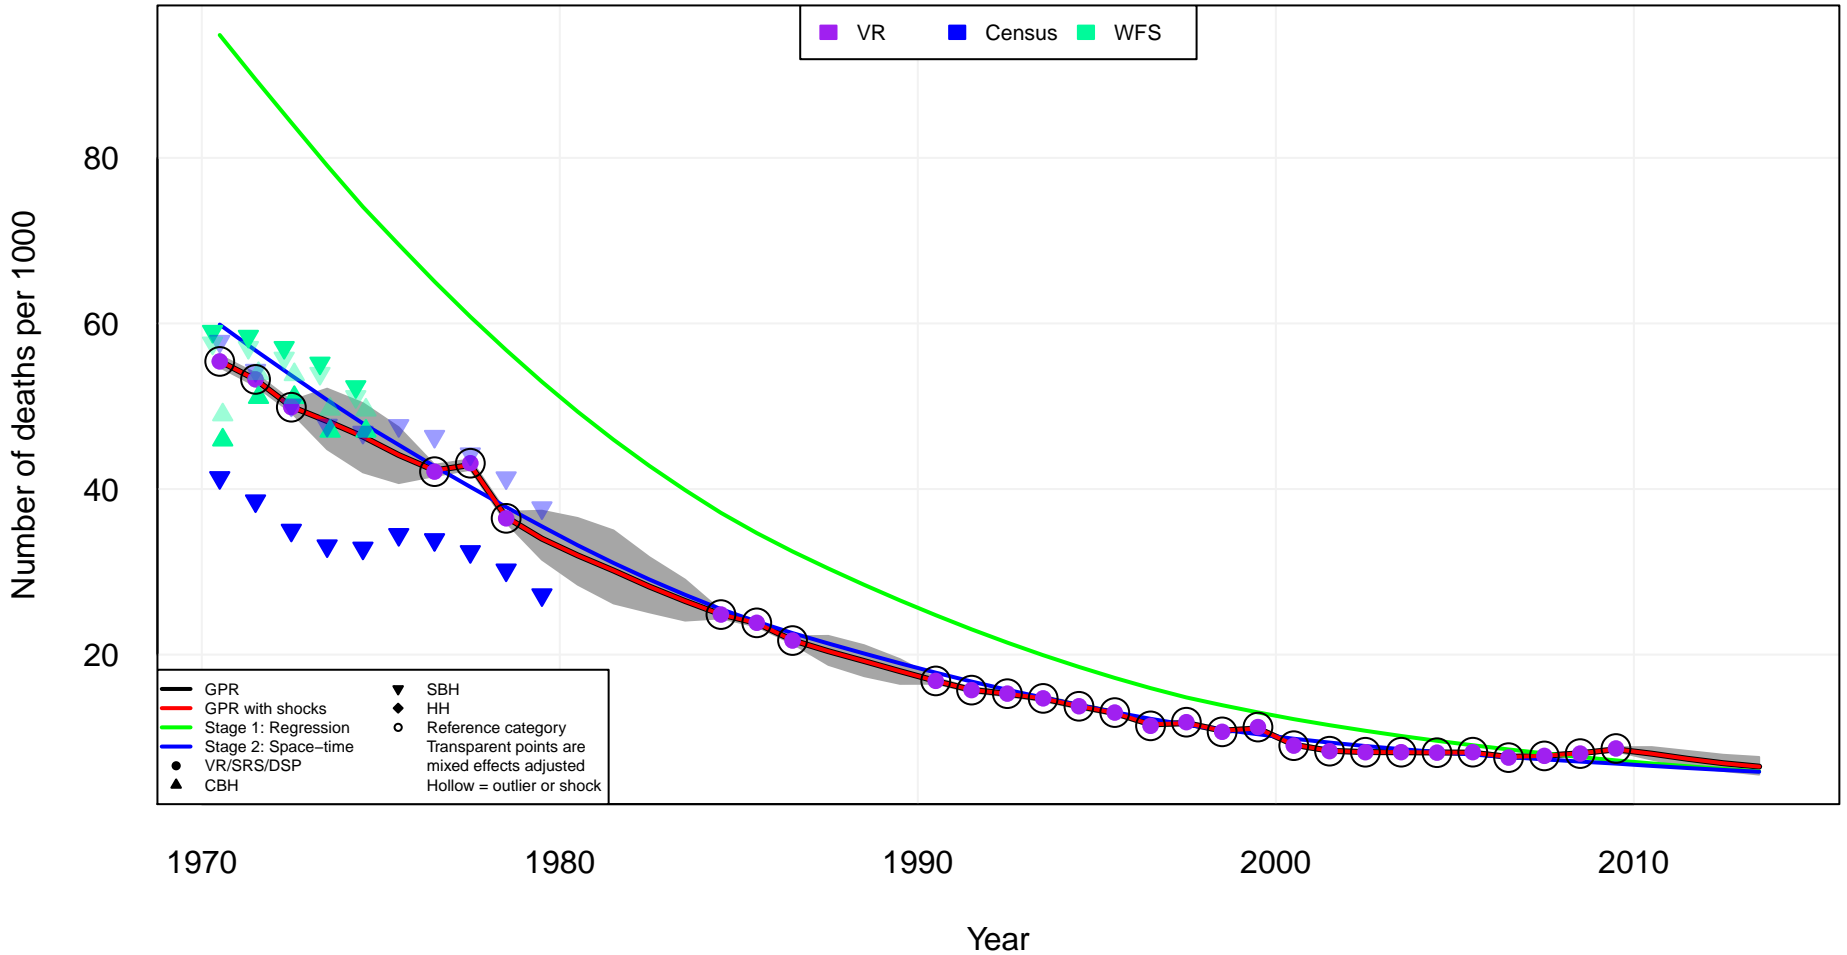

# Asia, Southeast Philippines (PHL)

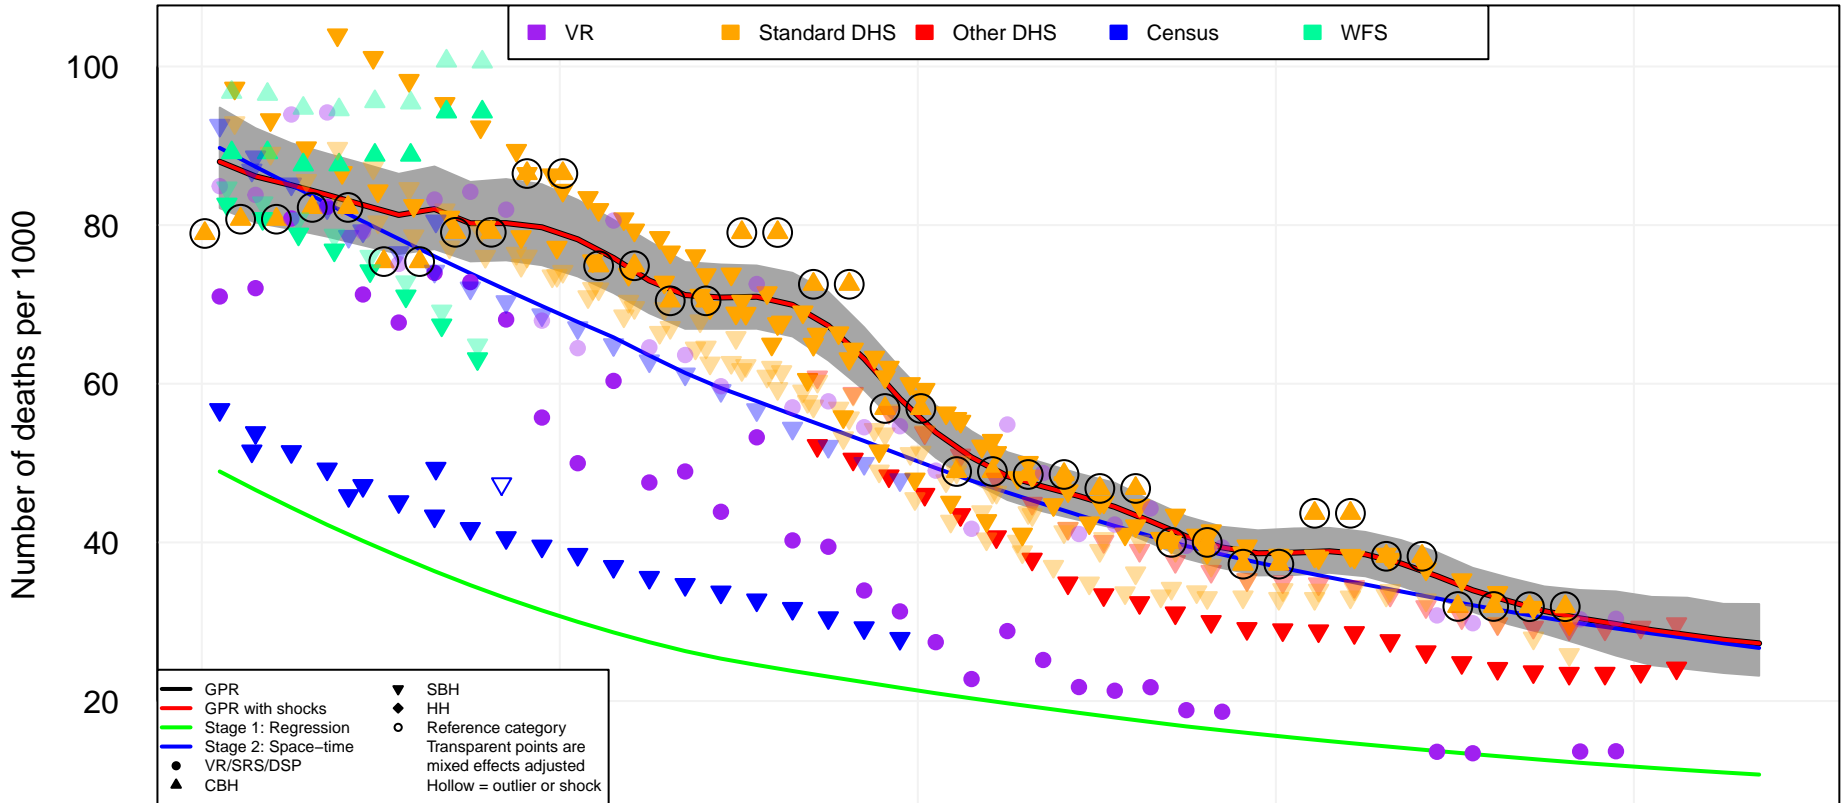

1970

1980

1990

2000

2010

Year

# Asia, Southeast Seychelles (SYC)

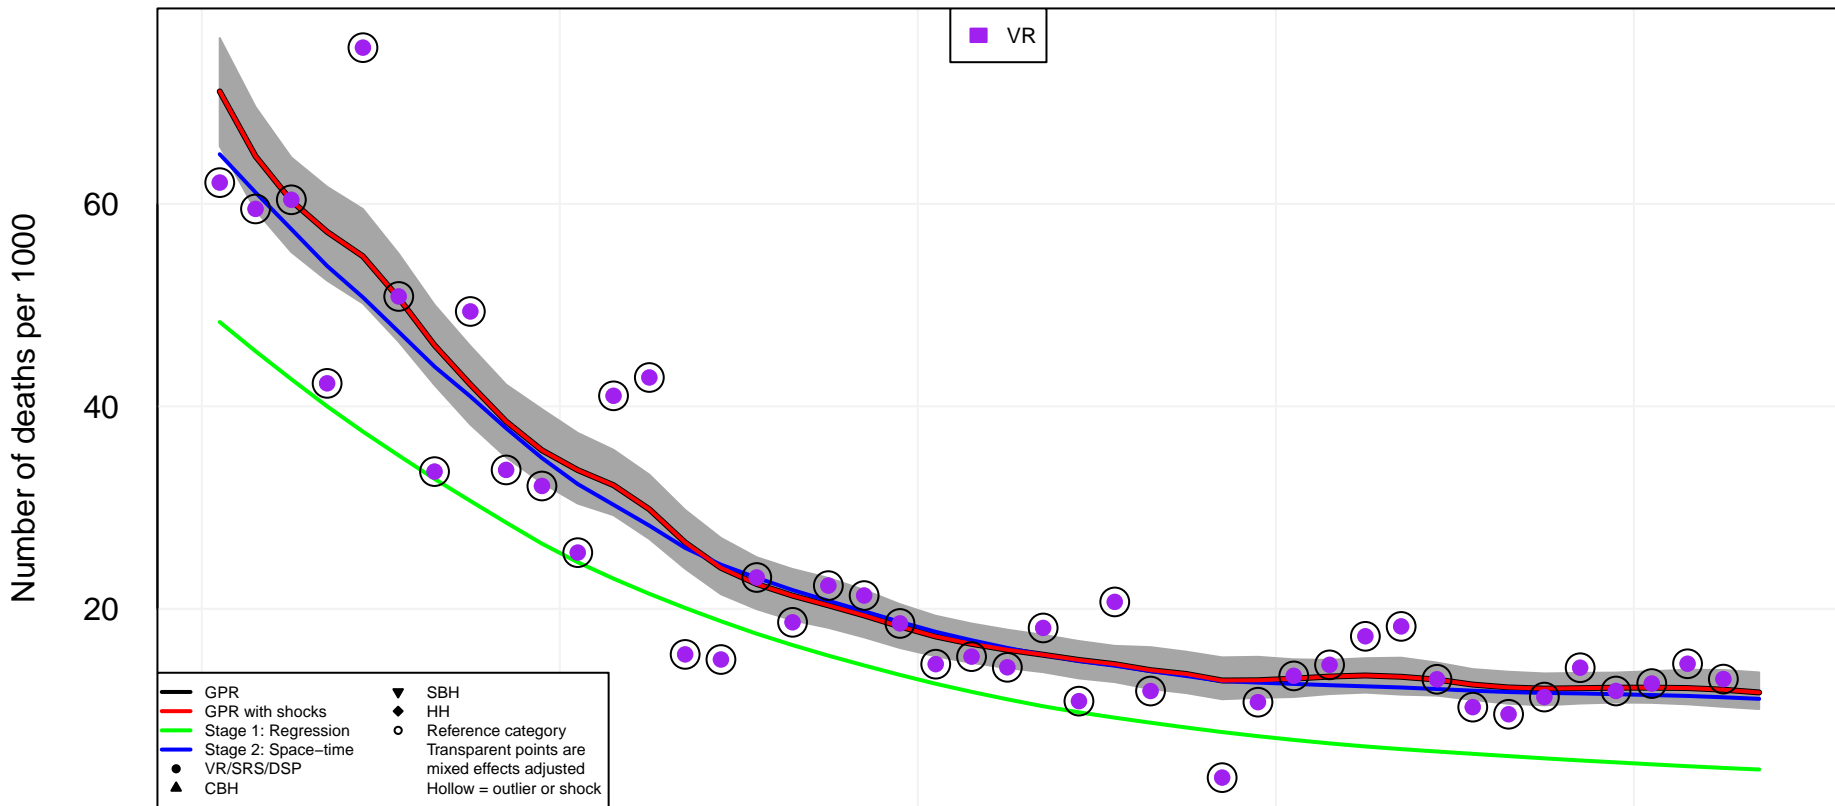

1970

1980

1990

2000

2010

Year

# Asia, Southeast Thailand (THA)

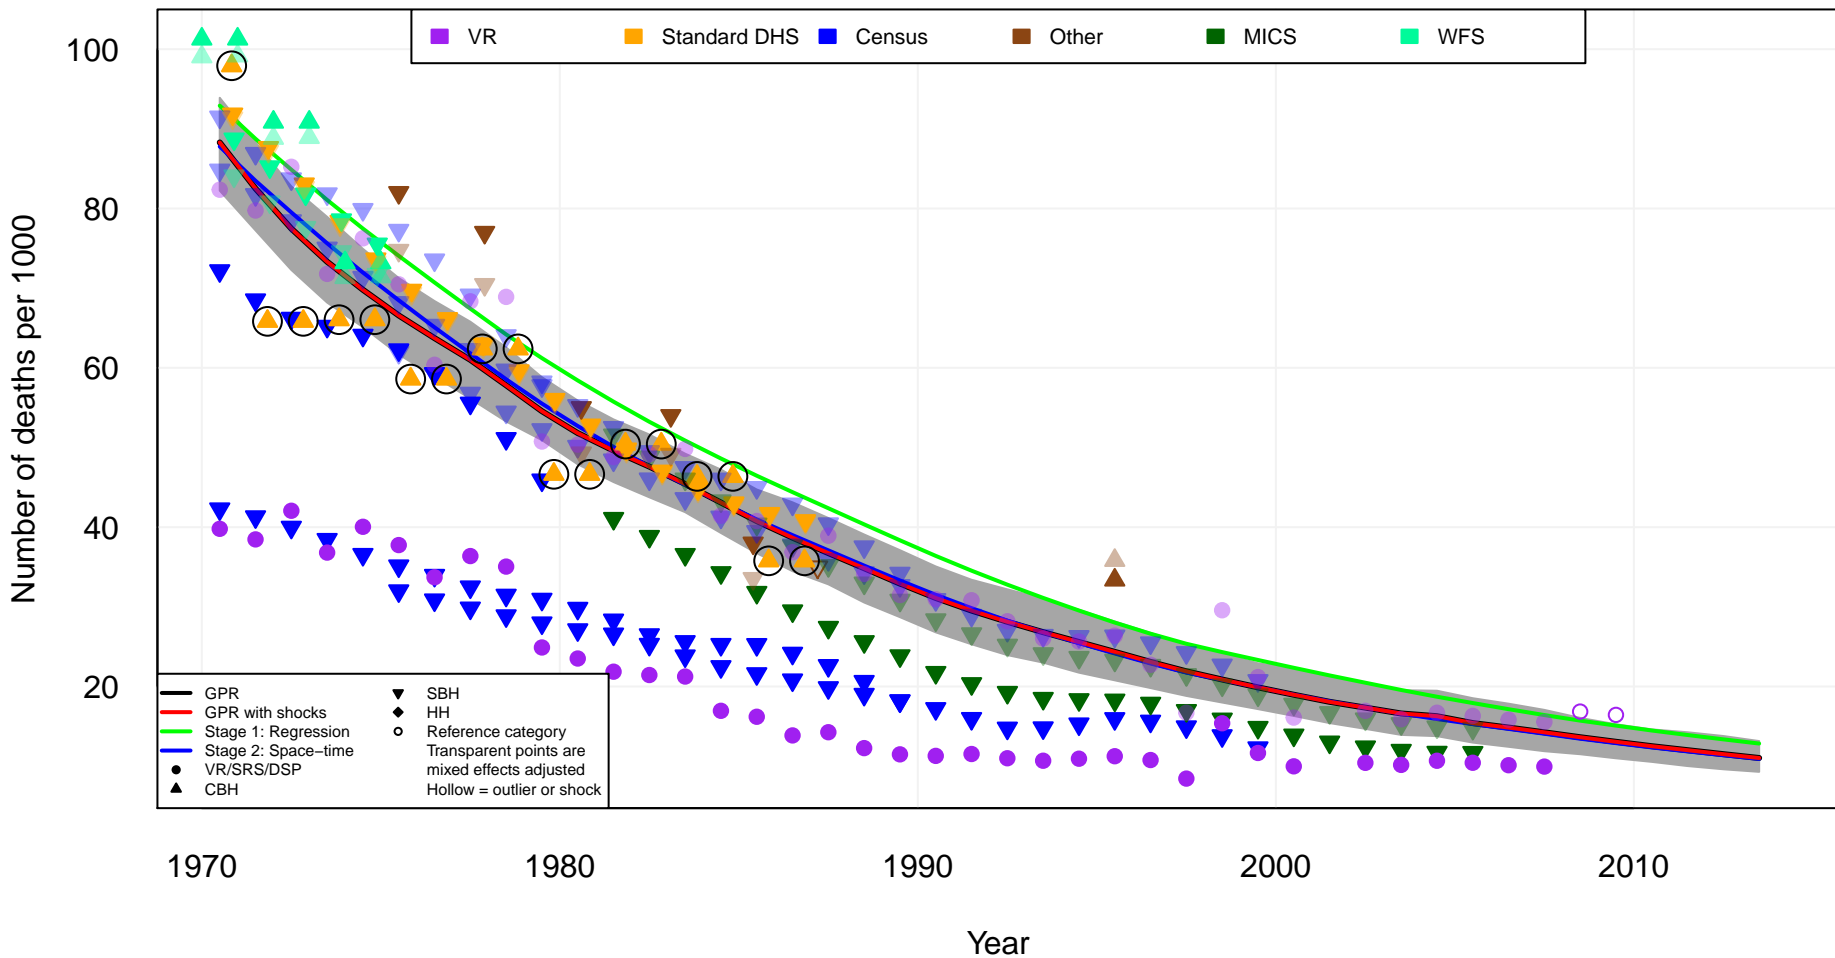

# Asia, Southeast Timor-Leste (TLS)

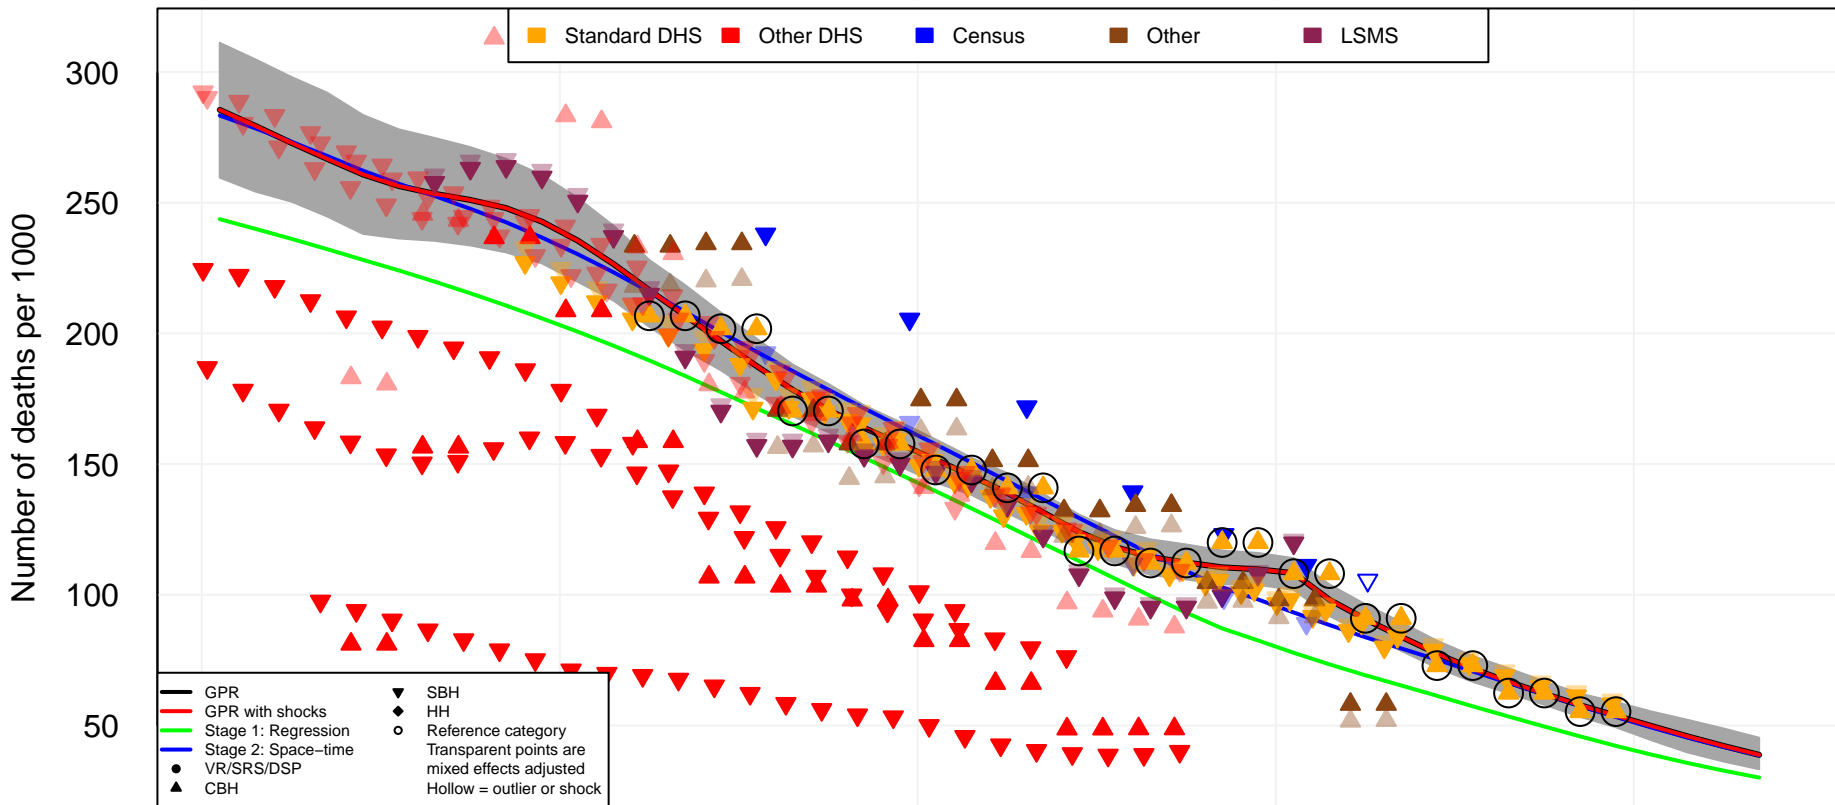

1970

1980

1990

2000

2010

Year

# Asia, Southeast Vietnam (VNM)

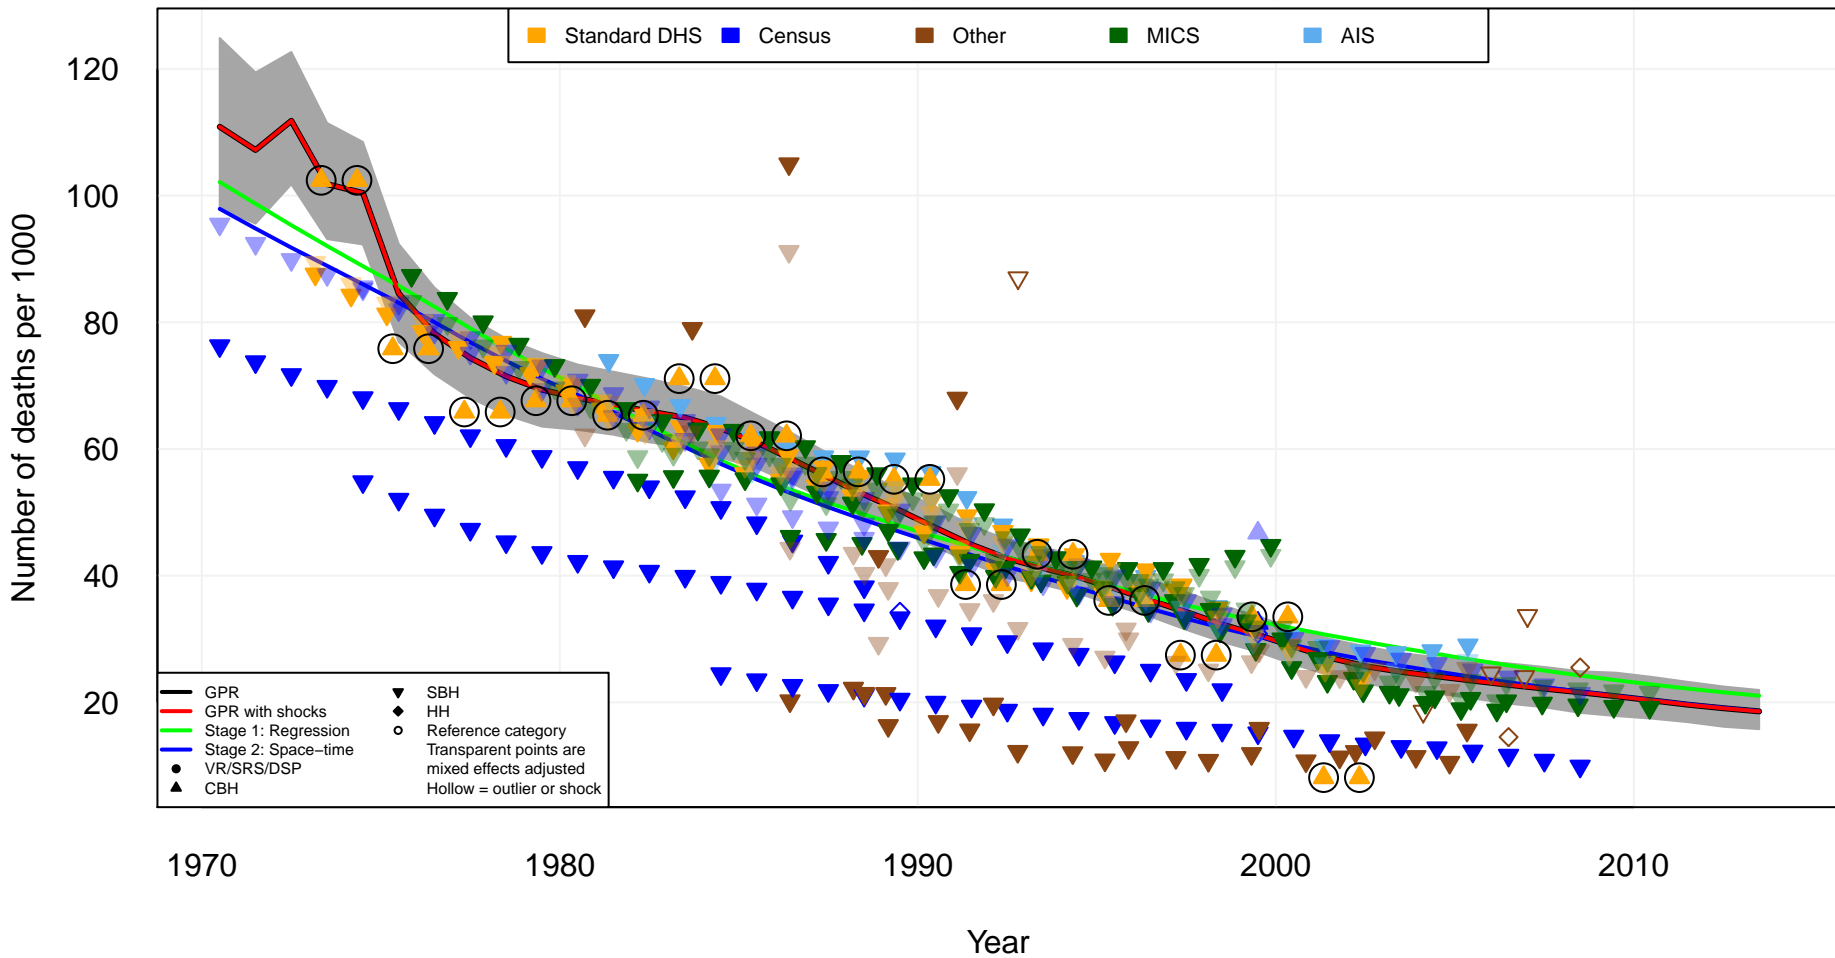

Australasia  
Australia (AUS)

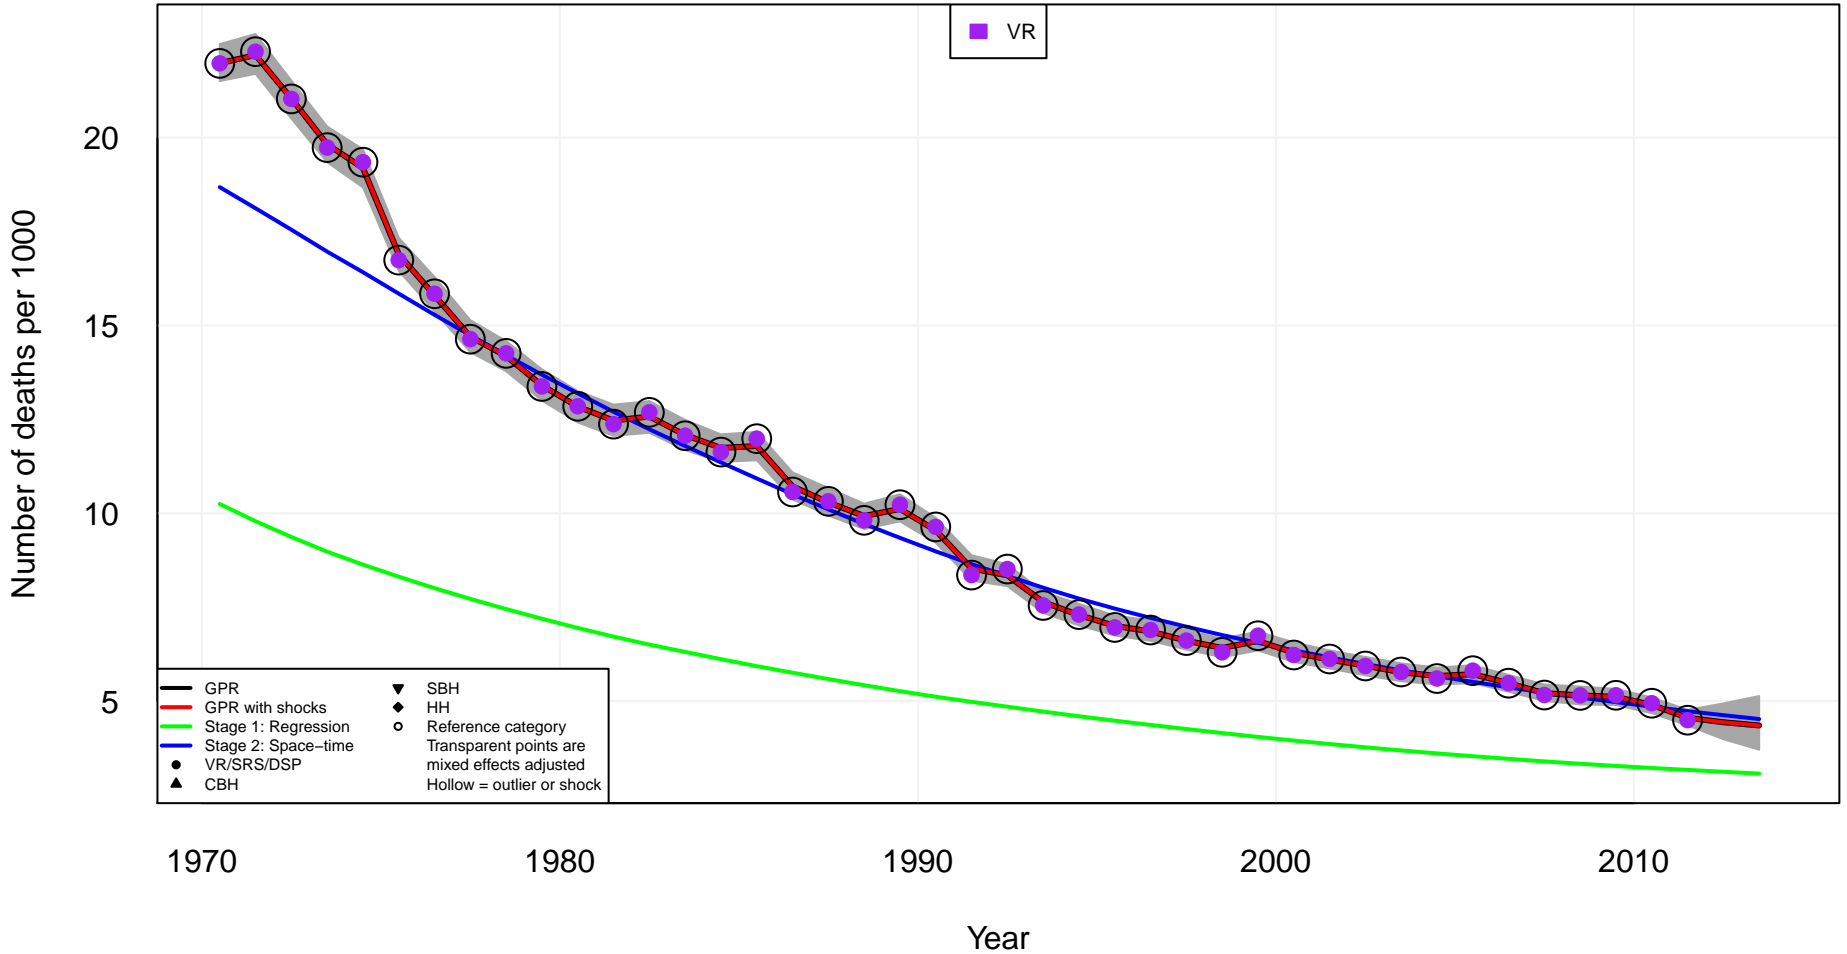

# Australasia New Zealand (NZL)

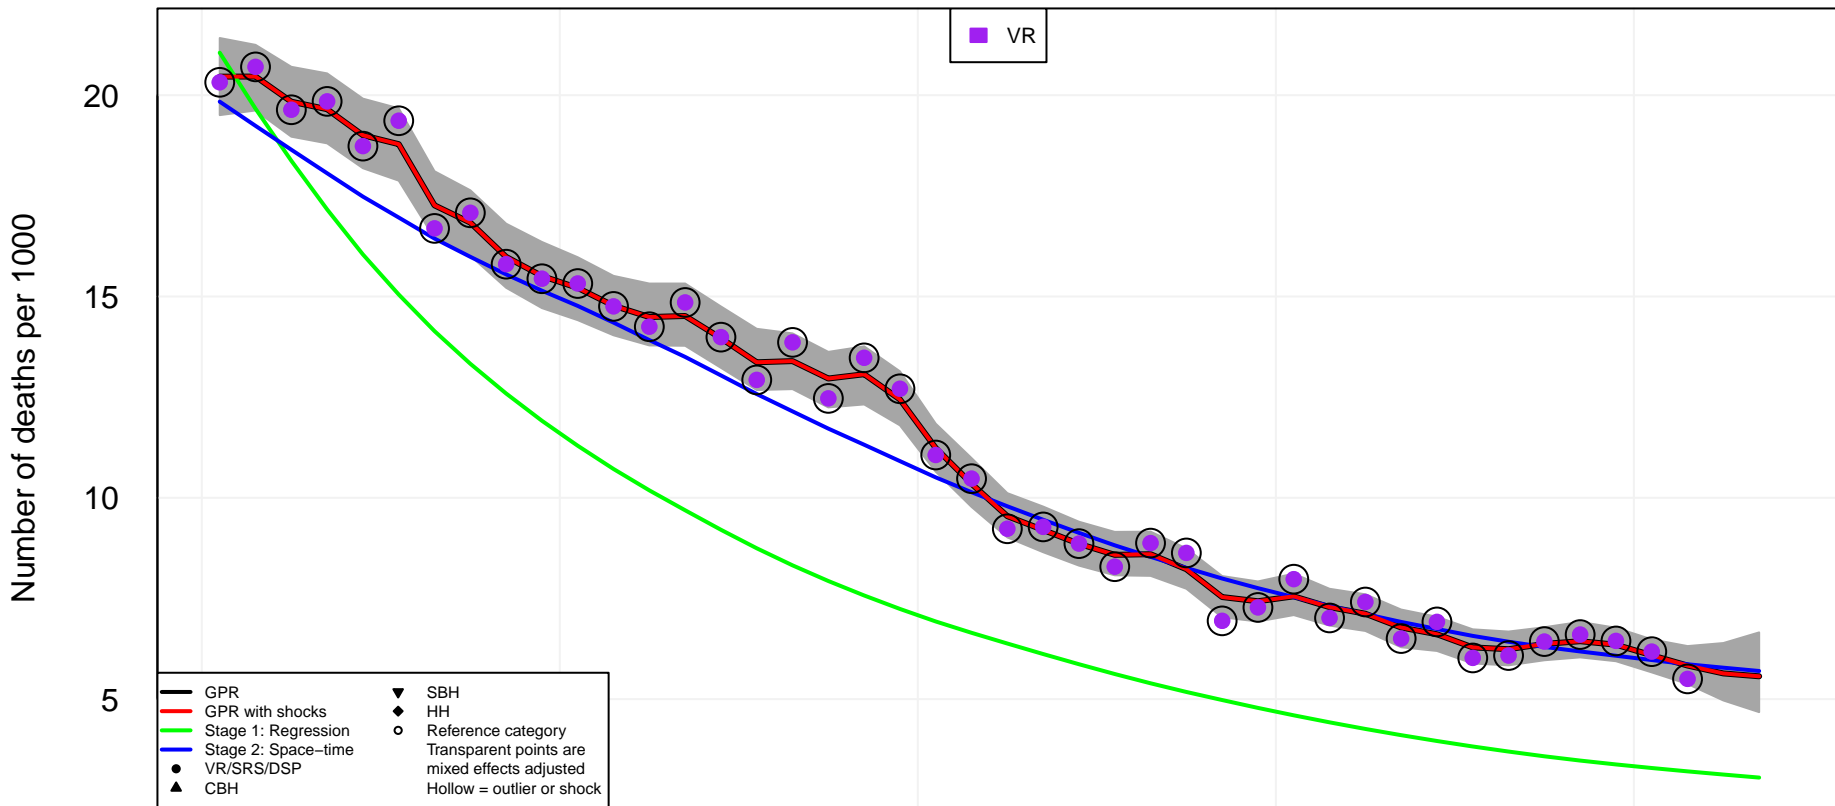



# Caribbean Antigua and Barbuda (ATG)

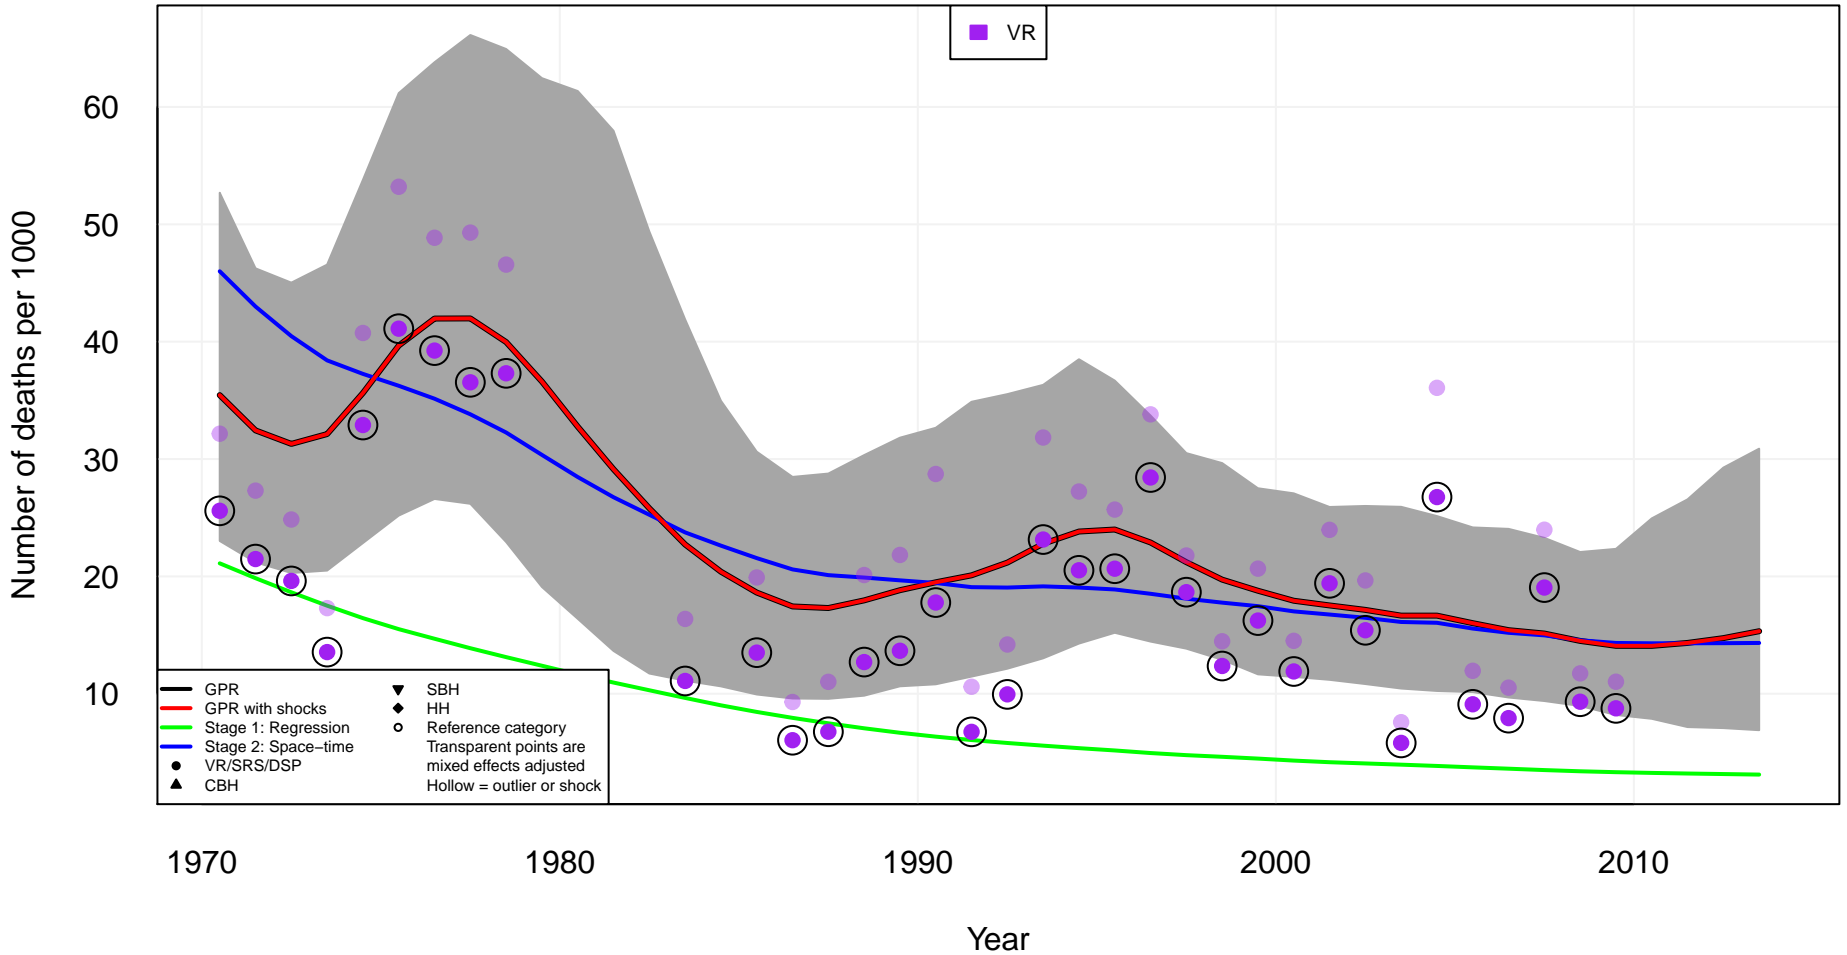

# Caribbean The Bahamas (BHS)

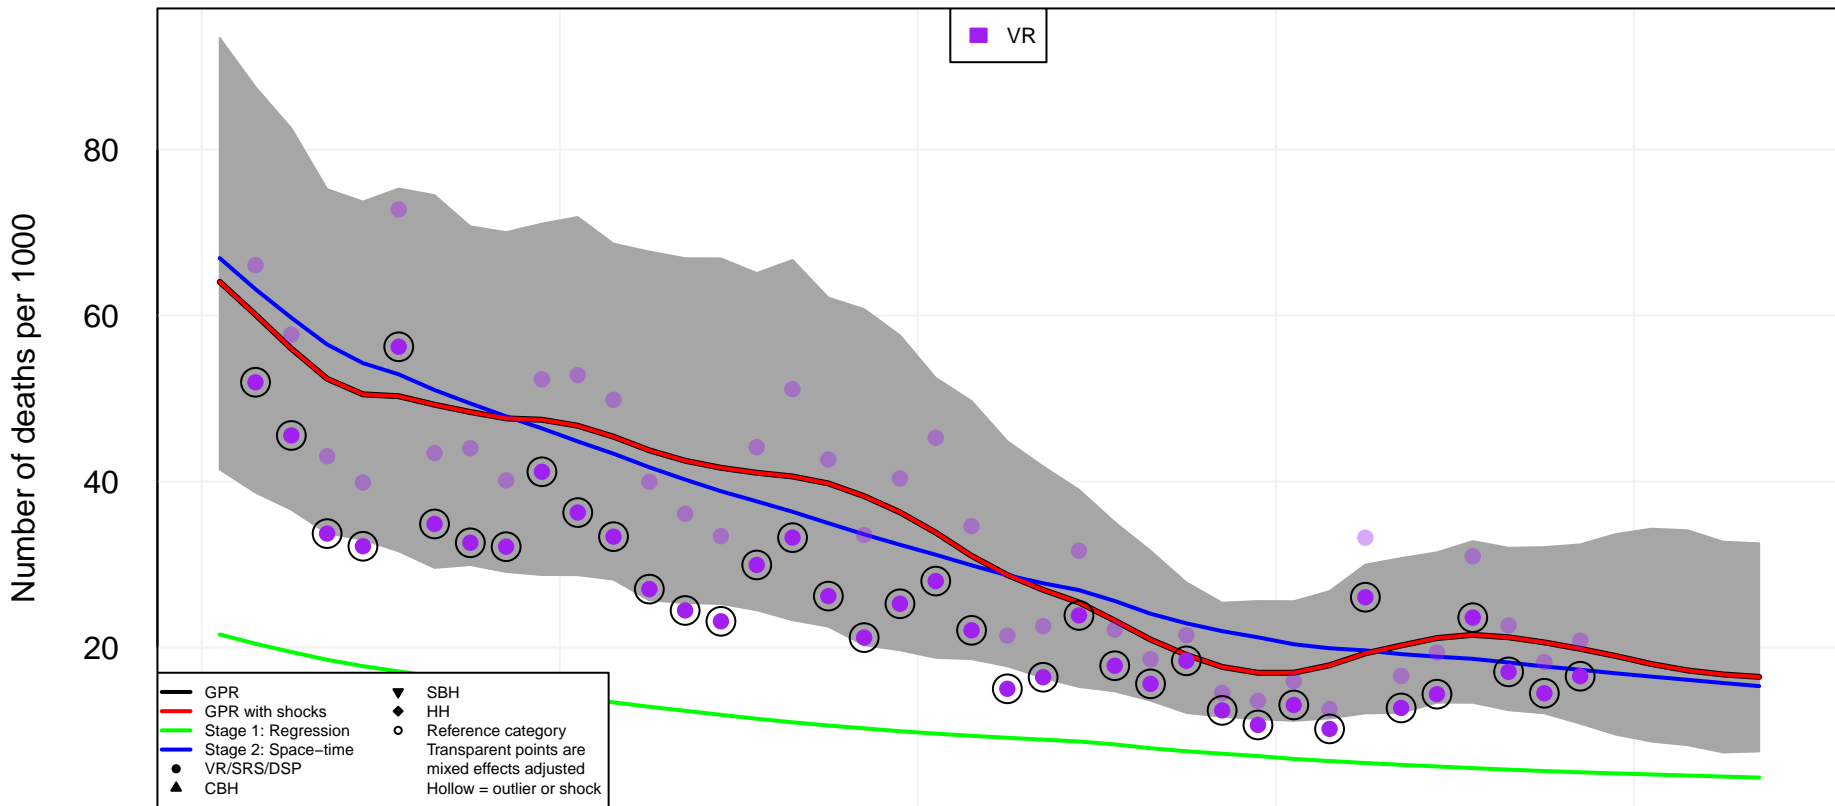

1970

1980

1990

2000

2010

Year

# Caribbean Belize (BLZ)

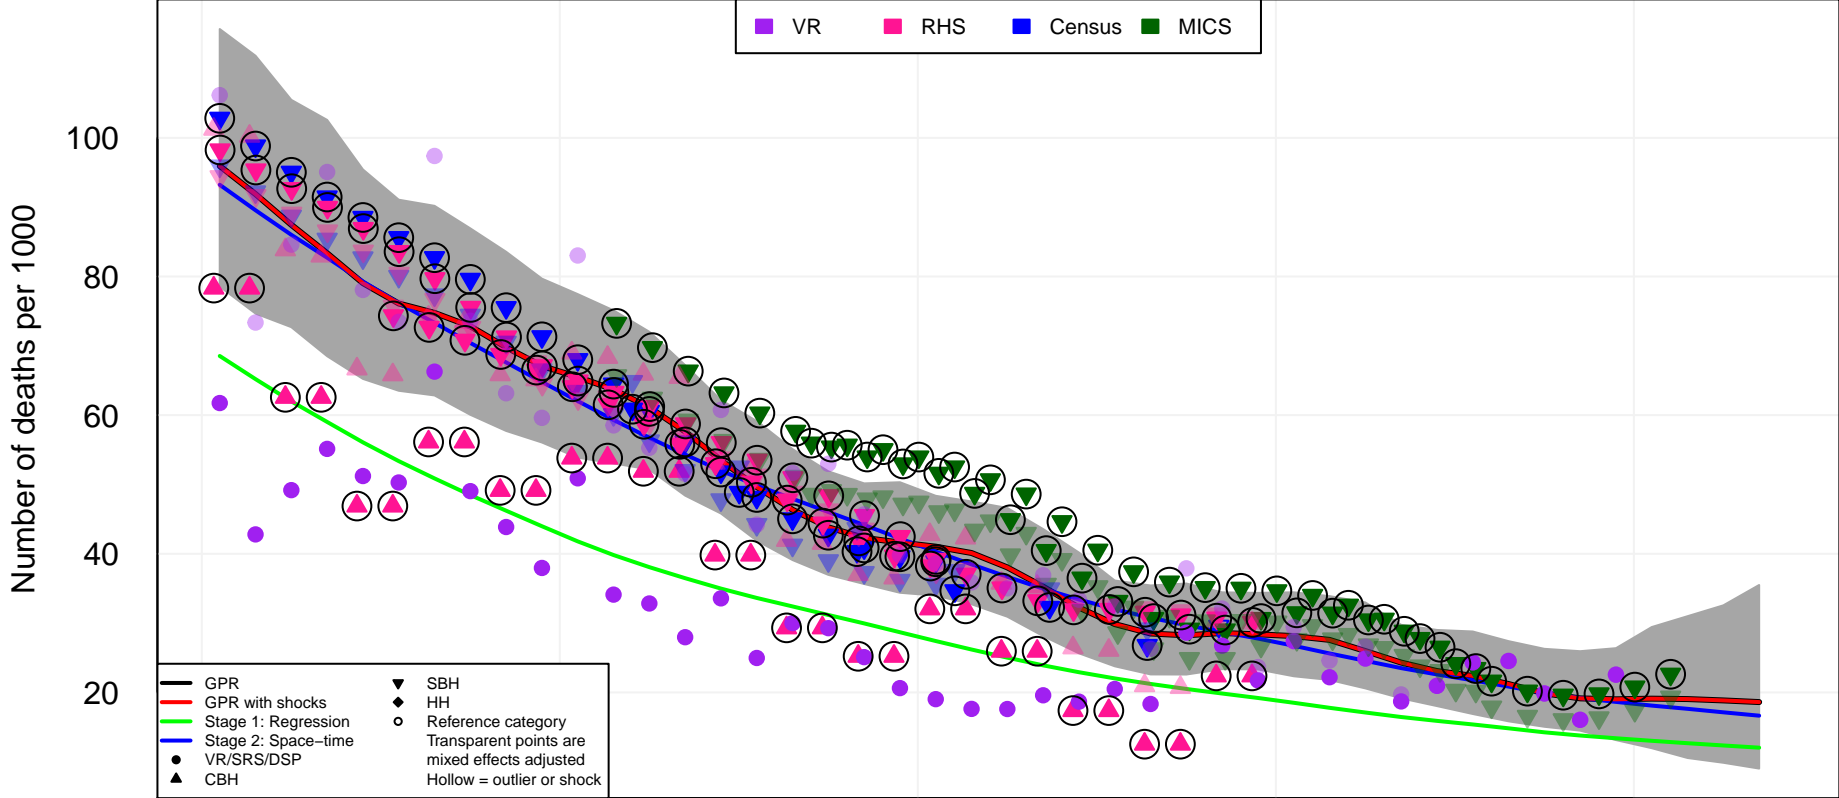

1970

1980

1990

2000

2010

Year

# Caribbean Barbados (BRB)

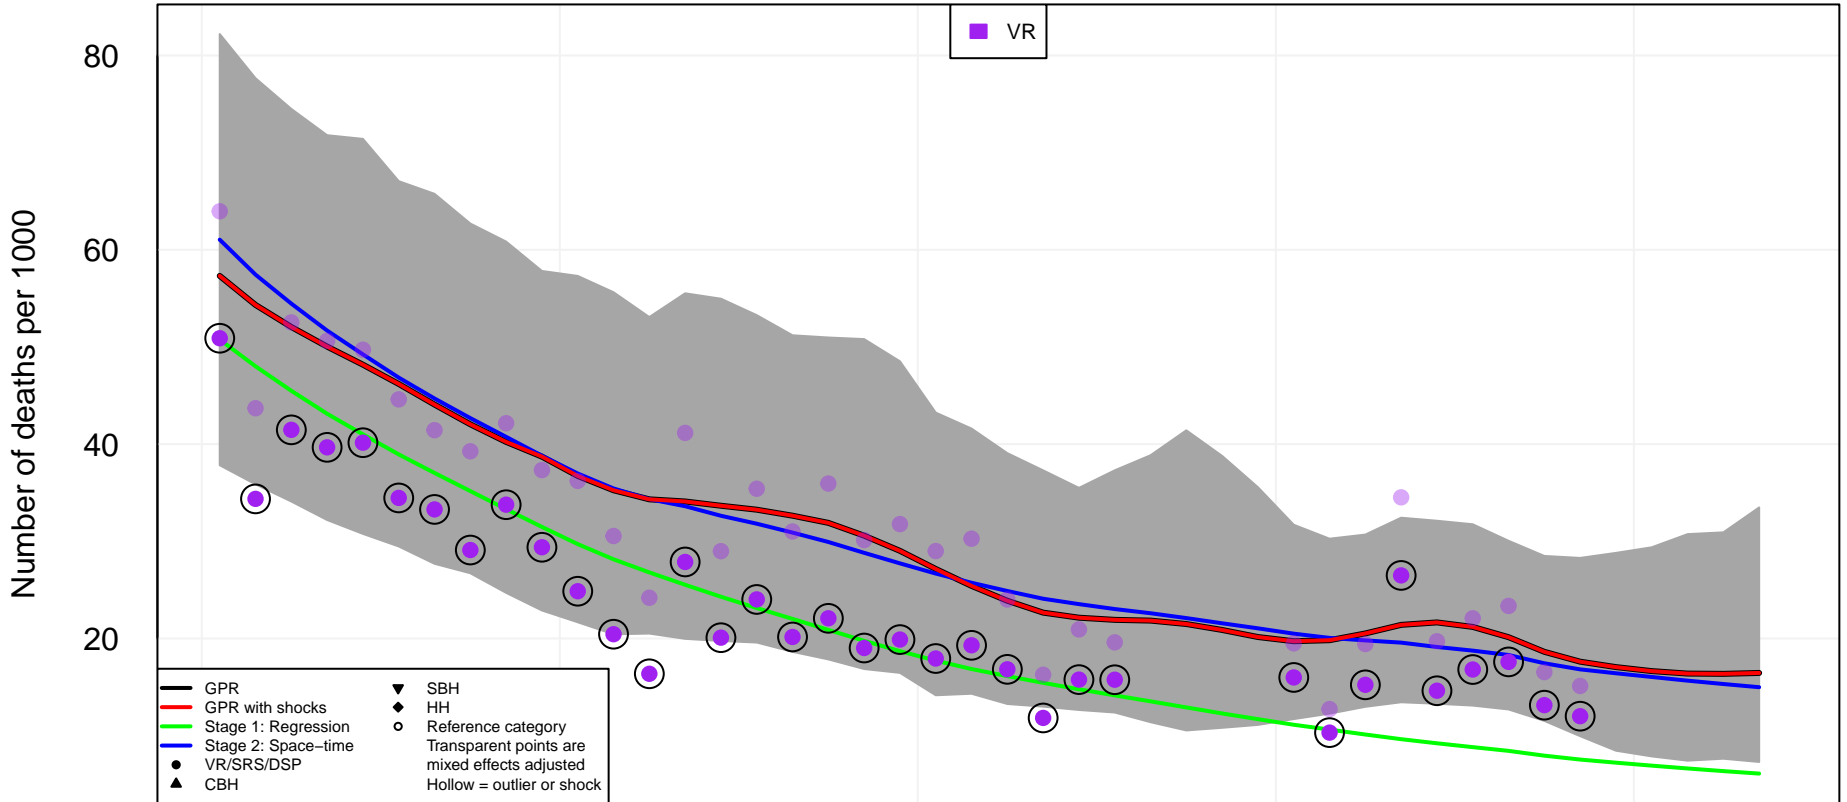

# Caribbean Cuba (CUB)

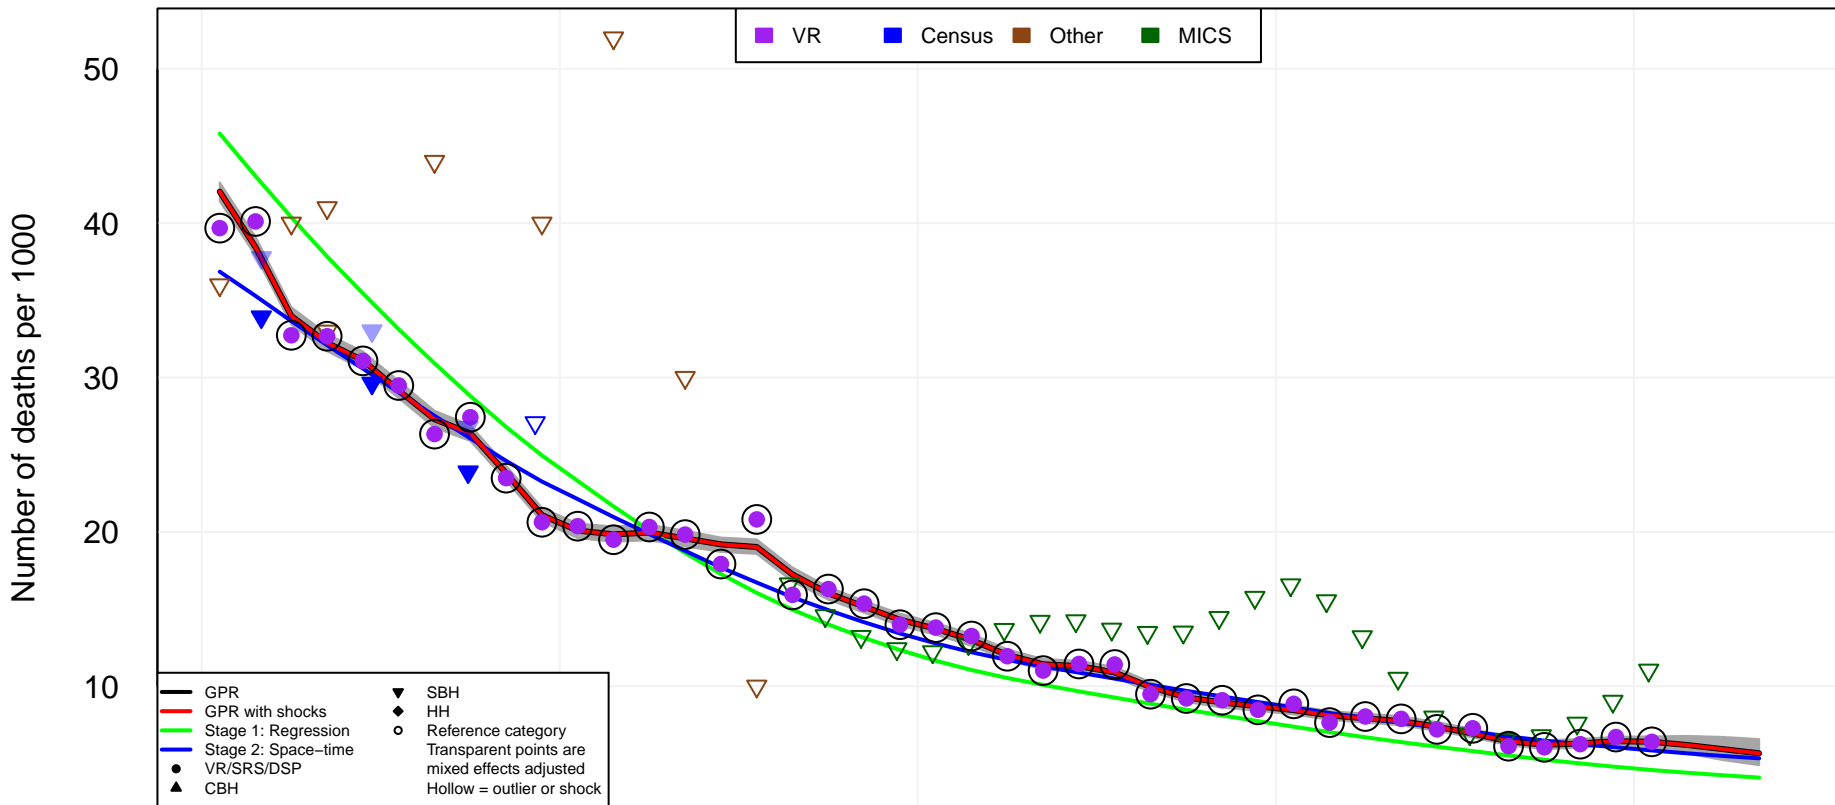

1970

1980

1990

2000

2010

Year

# Caribbean Dominica (DMA)

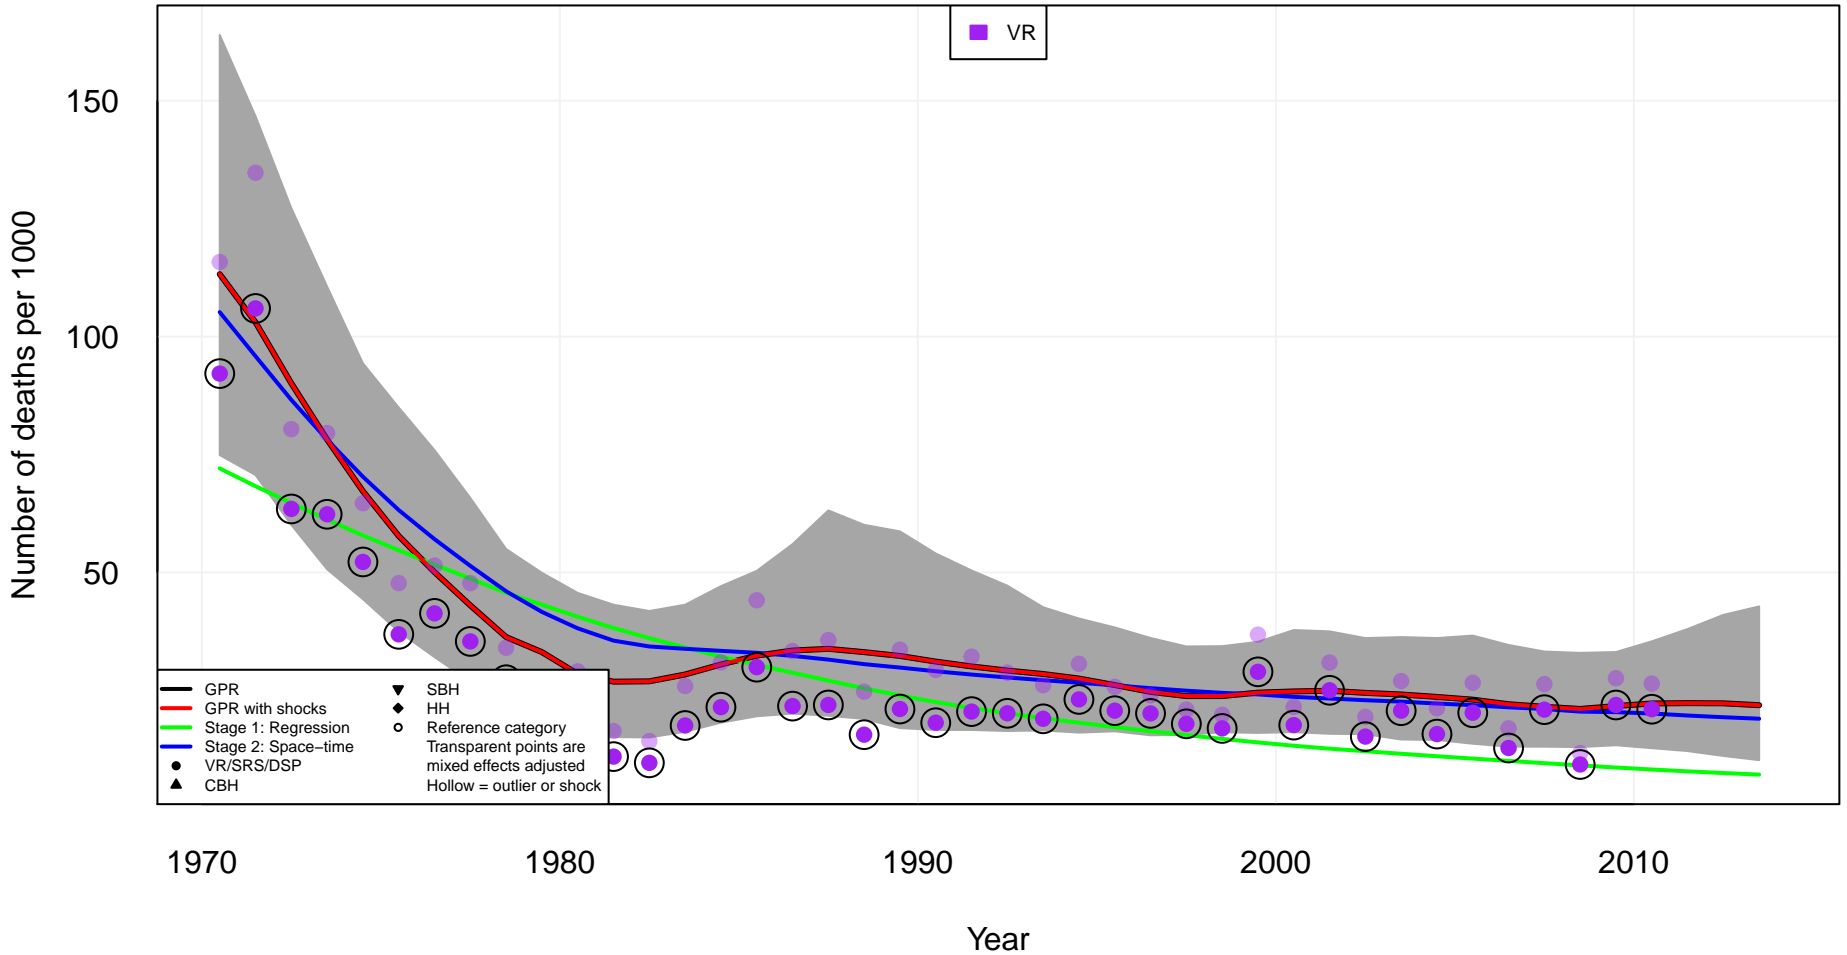

# Caribbean Dominican Republic (DOM)

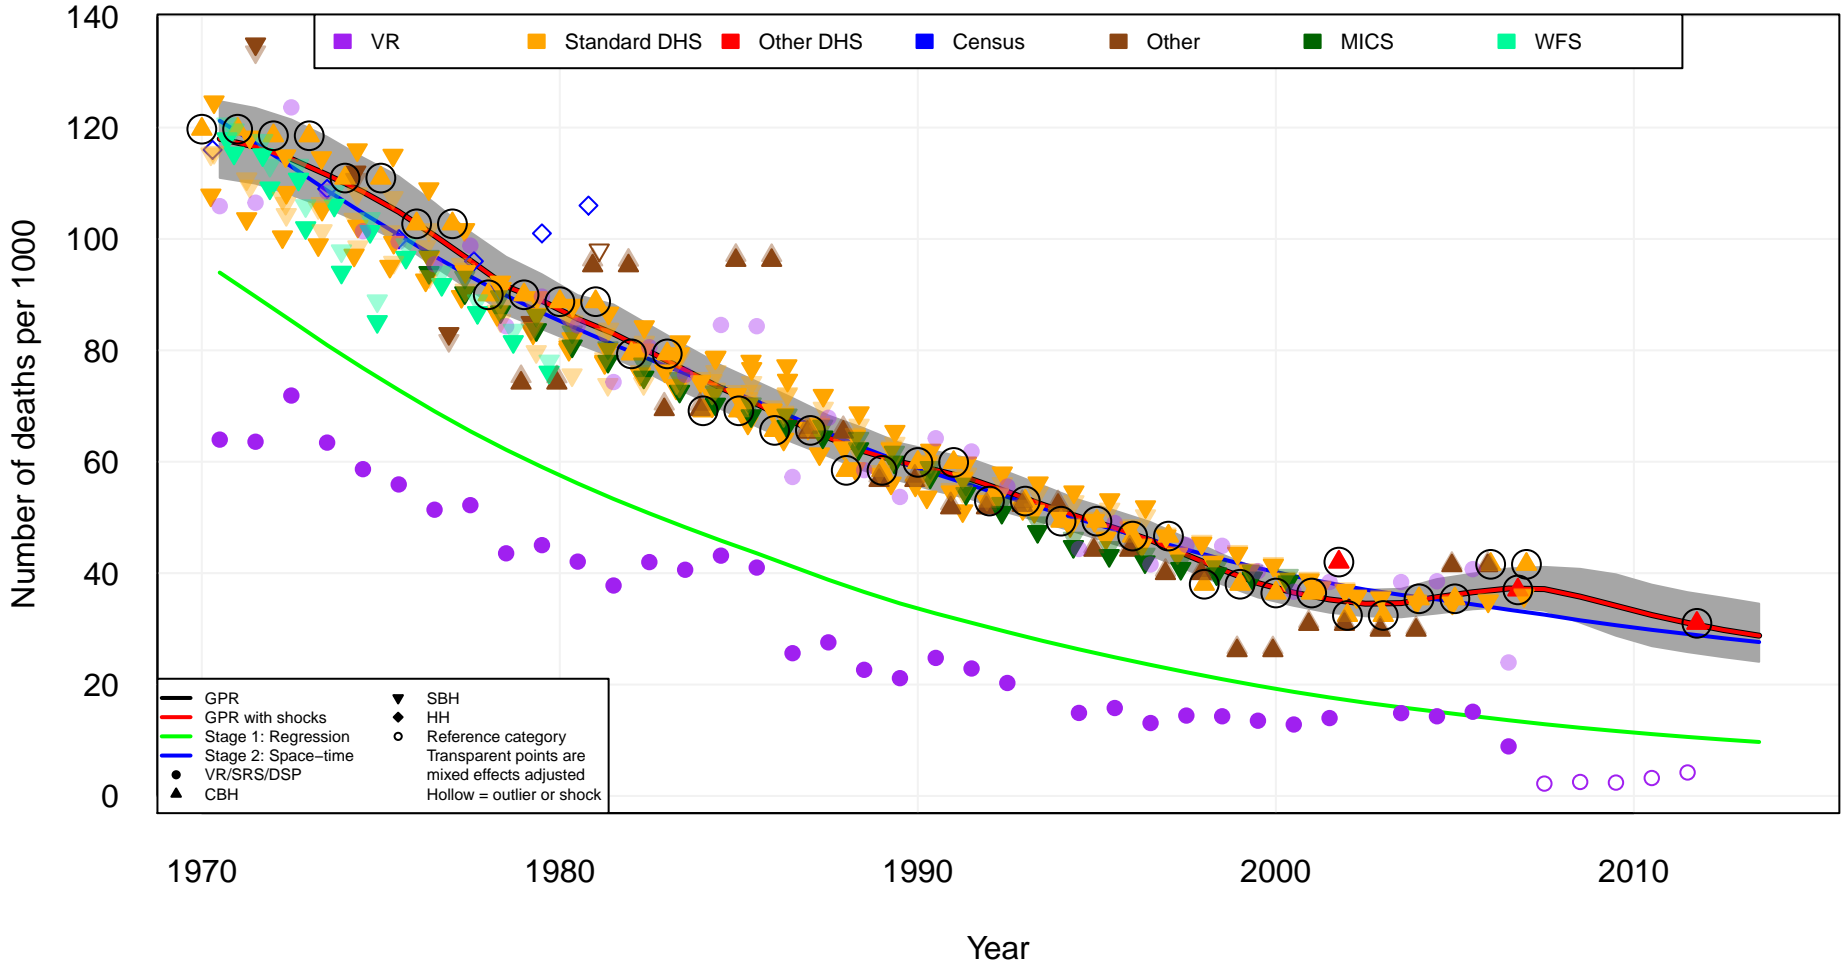

# Caribbean Grenada (GRD)

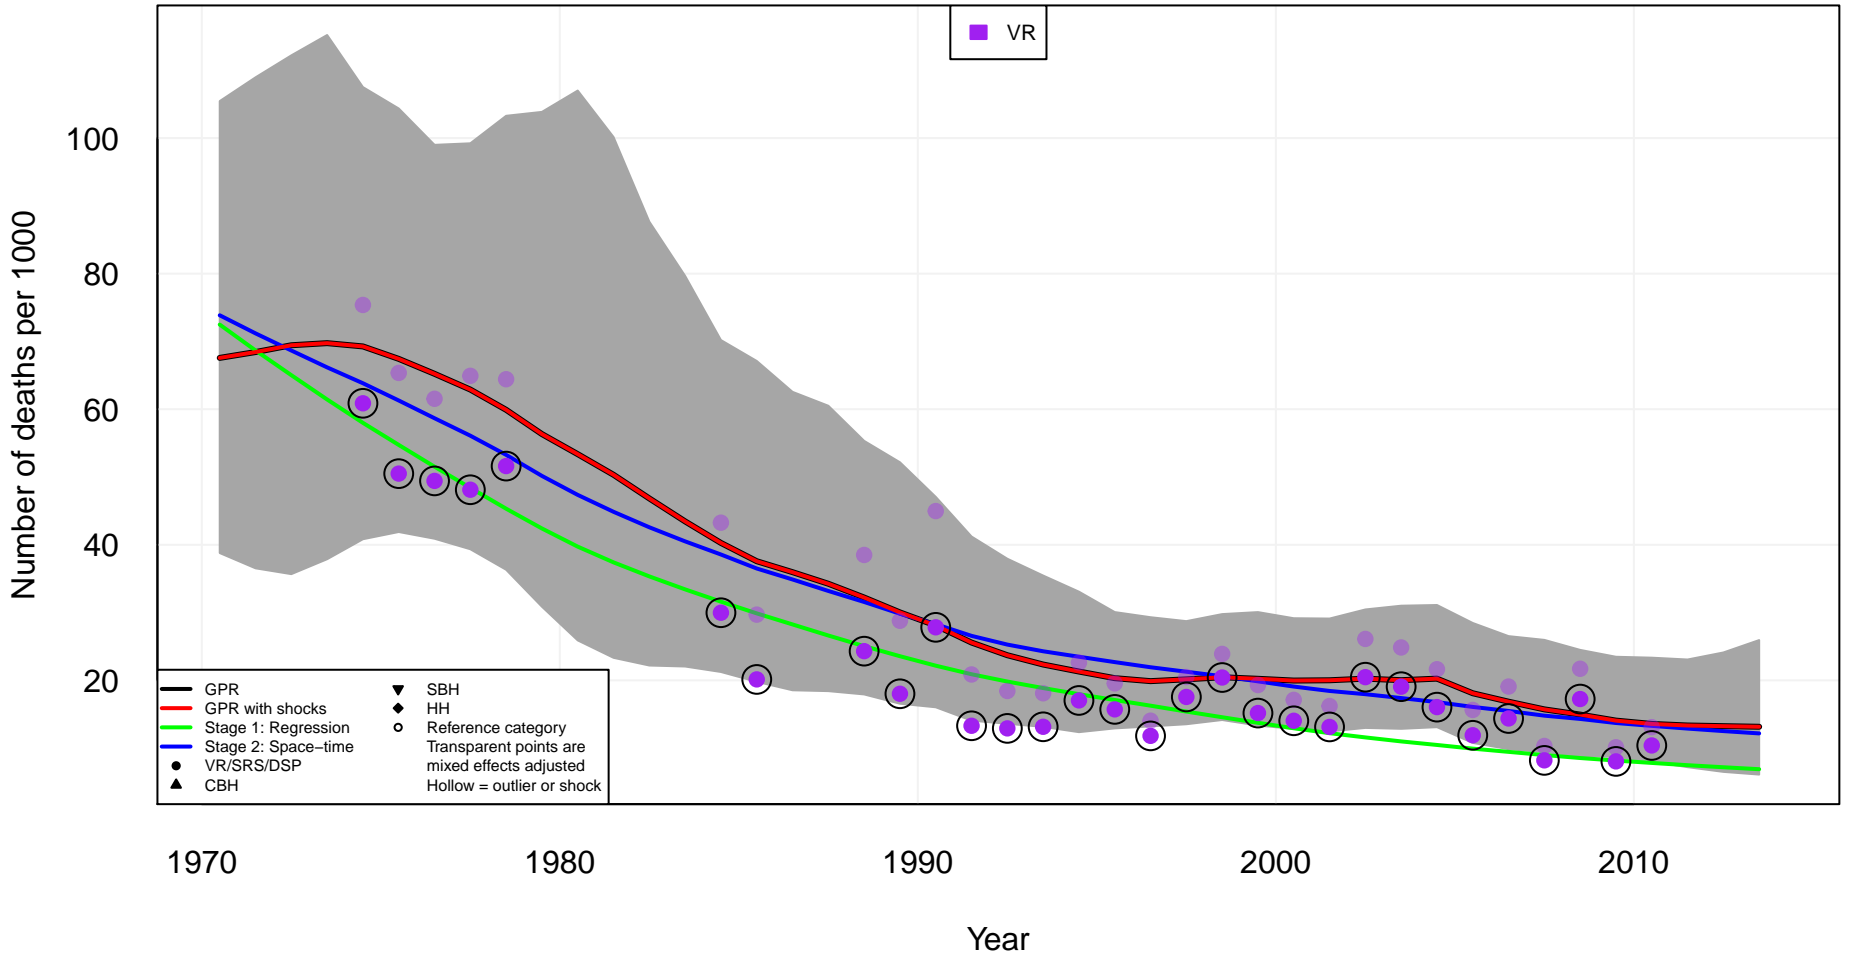



# Caribbean Guyana (GUY)

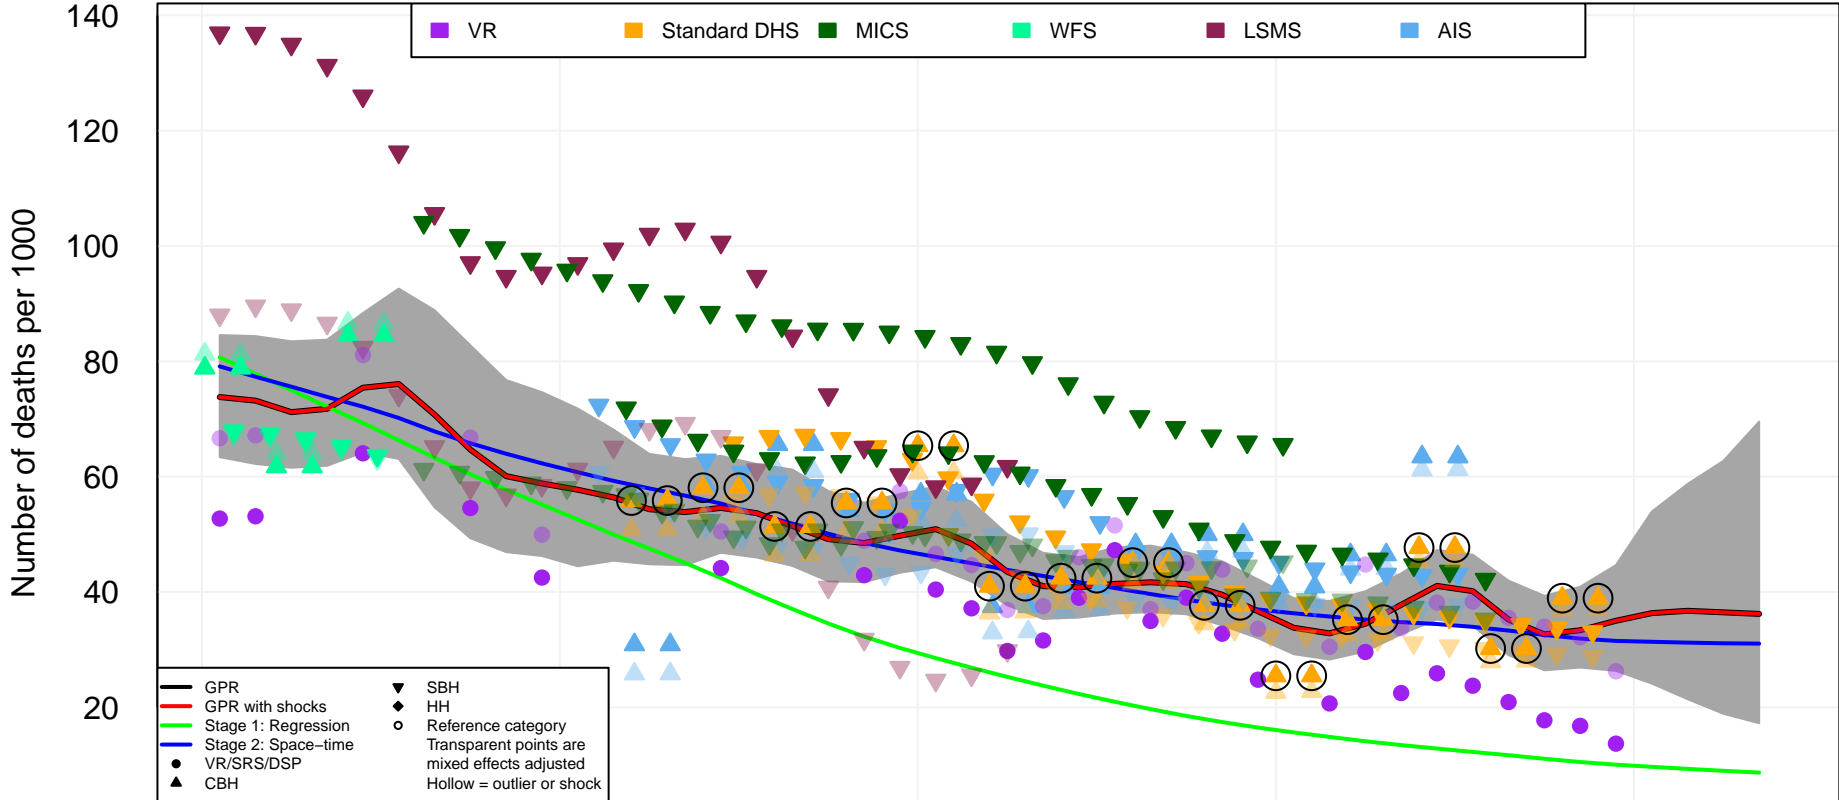

1970

1980

1990

2000

2010

Year

Number of deaths per 1000

140

120

100

80

60

40

20

VR    Standard DHS    MICS    WFS    LSMS    AIS

— GPR  
 — GPR with shocks  
 — Stage 1: Regression  
 — Stage 2: Space-time  
 ● VR/SRS/DSP  
 ▲ CBH  
 ▼ SBH  
 ◆ HH  
 ○ Reference category  
 Transparent points are mixed effects adjusted  
 Hollow = outlier or shock

# Caribbean Haiti (HTI)

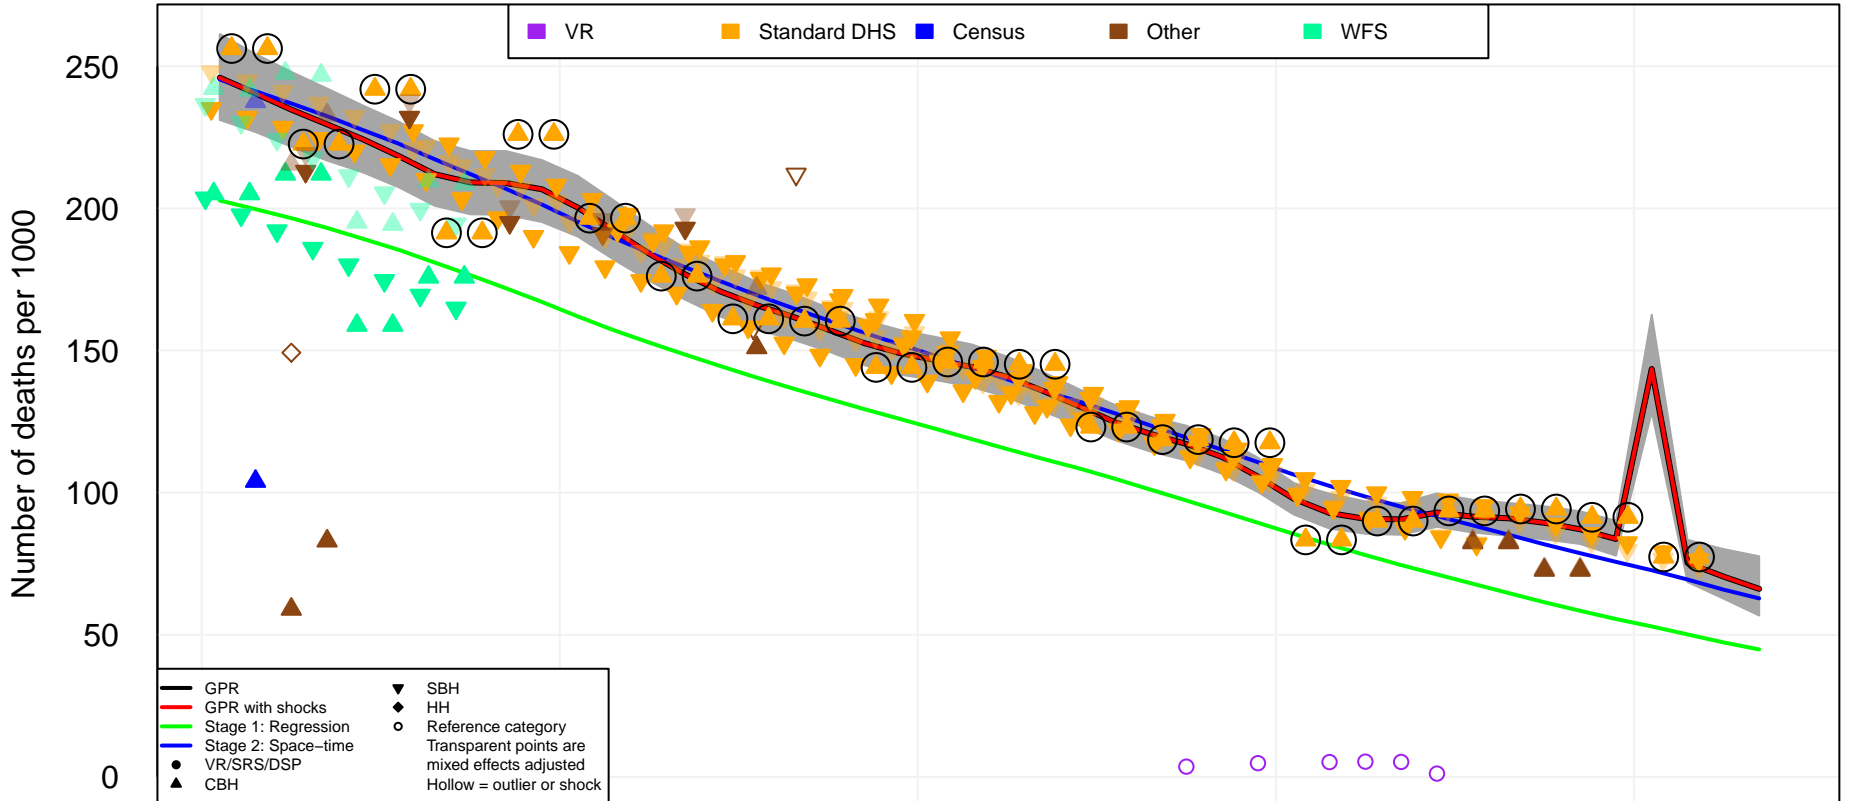

# Caribbean Jamaica (JAM)

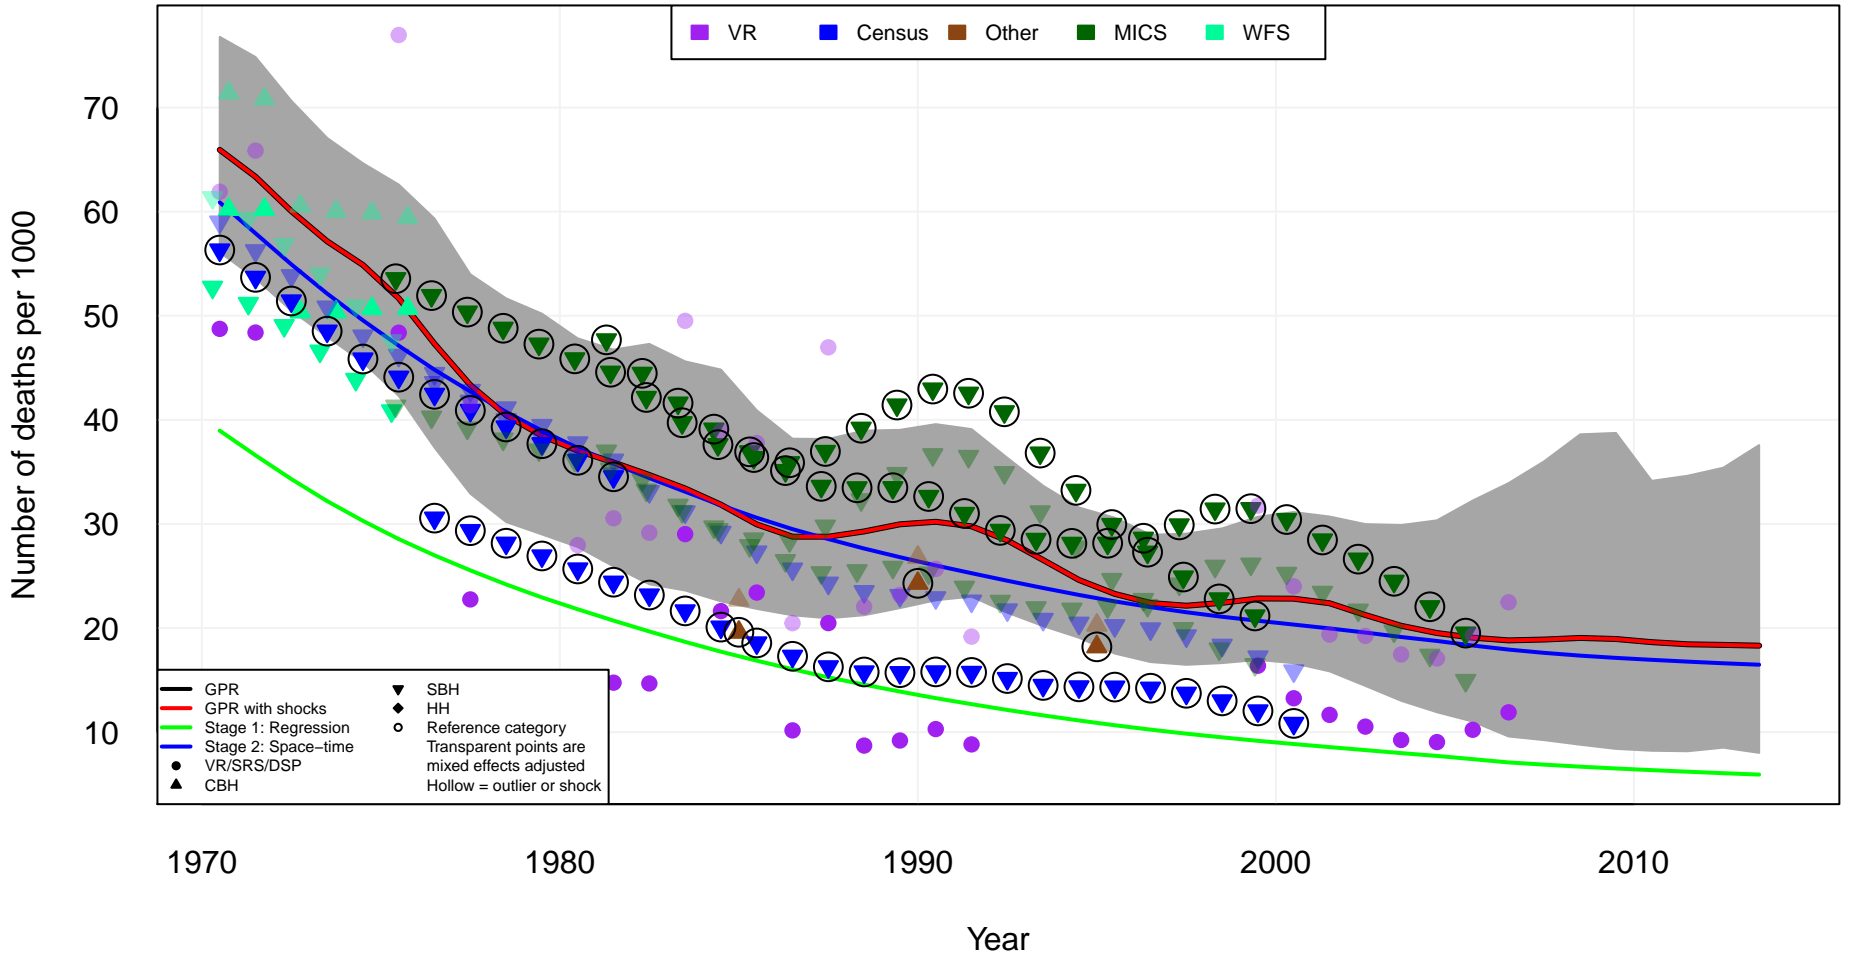

# Caribbean Saint Lucia (LCA)

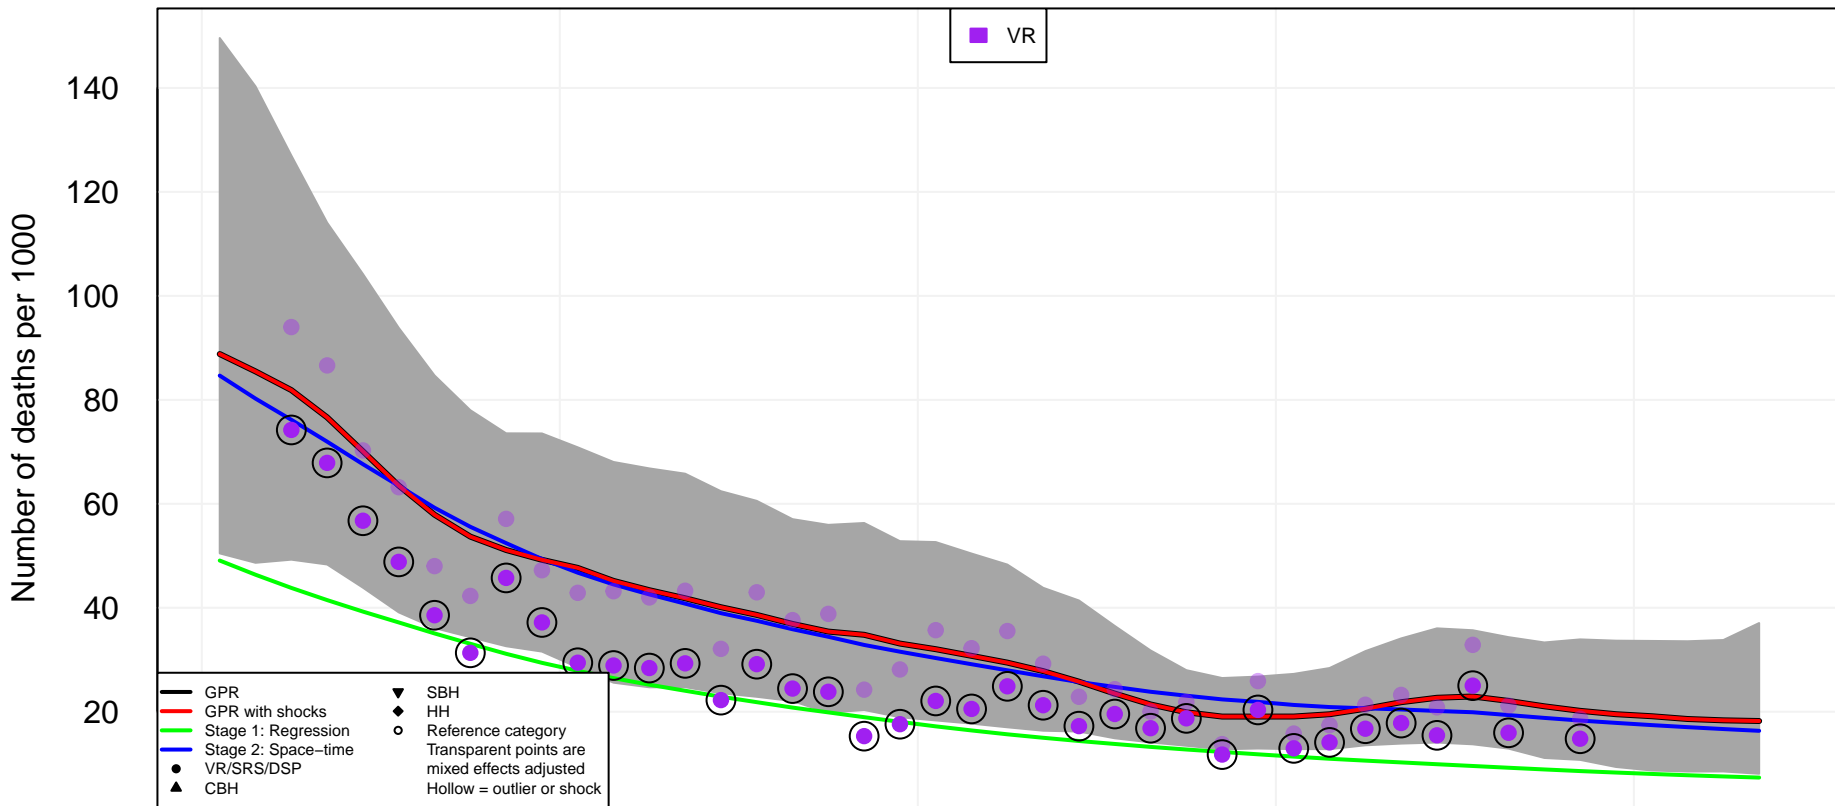

# Caribbean Suriname (SUR)

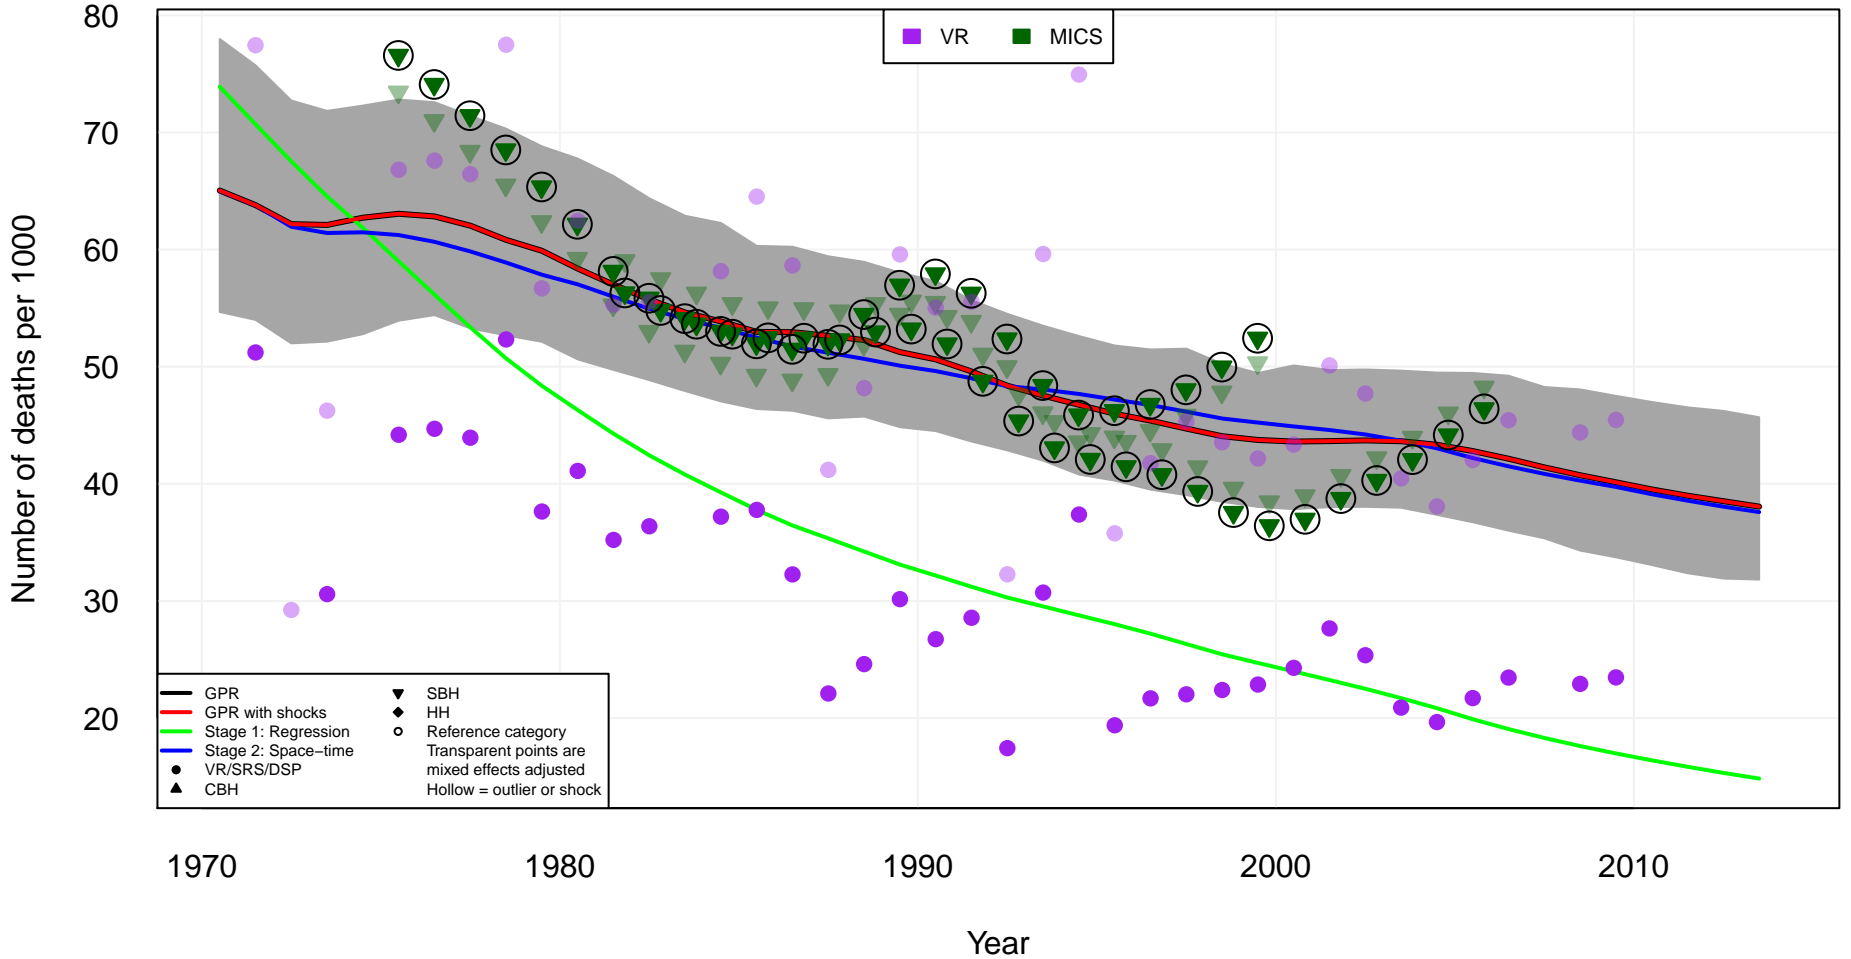

# Caribbean Trinidad and Tobago (TTO)

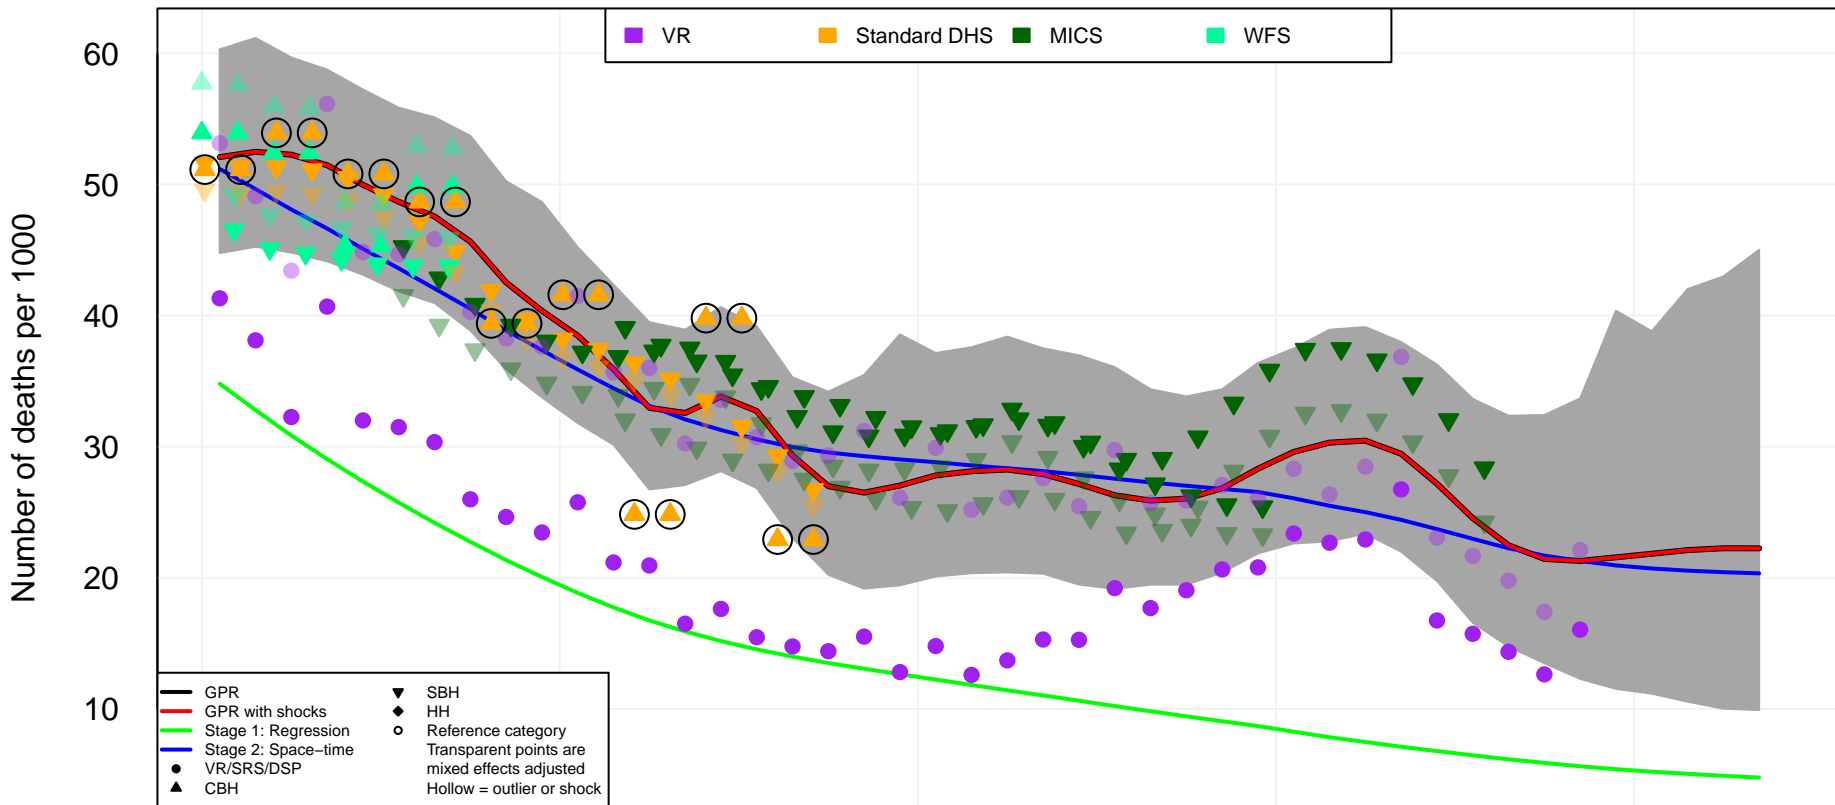

1970

1980

1990

2000

2010

Year

# Caribbean Saint Vincent and the Grenadines (VCT)

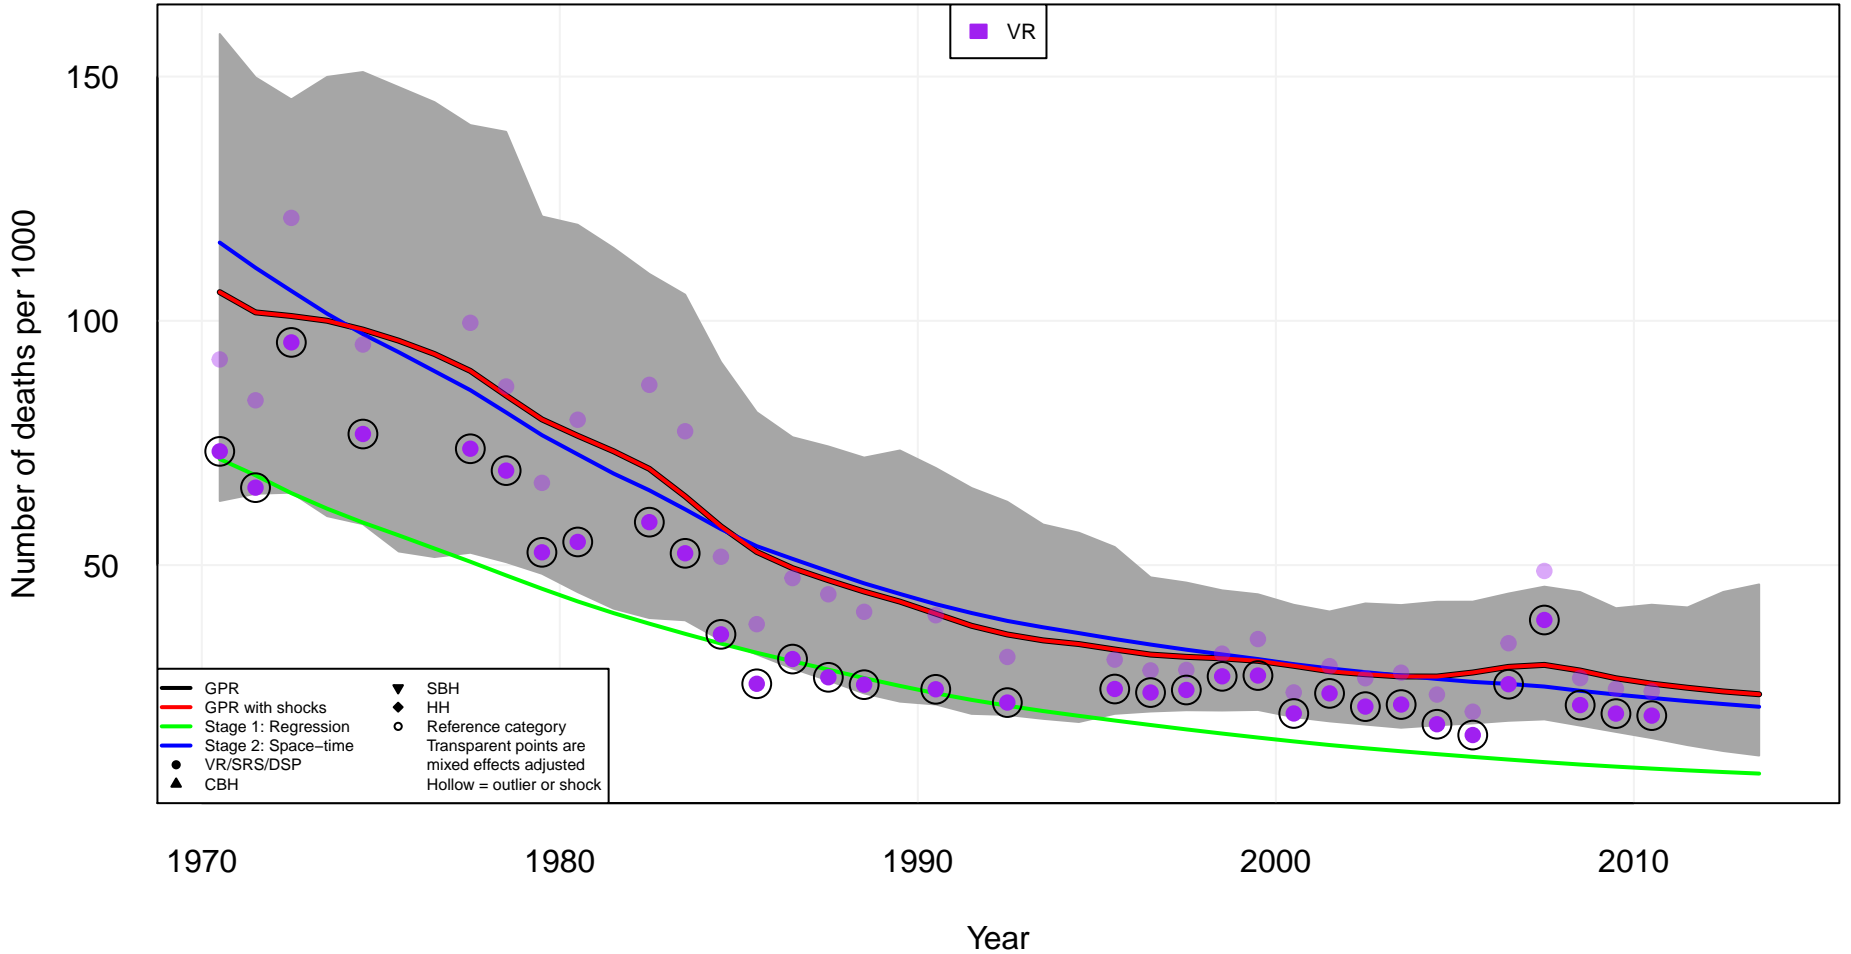

# Europe, Central Albania (ALB)

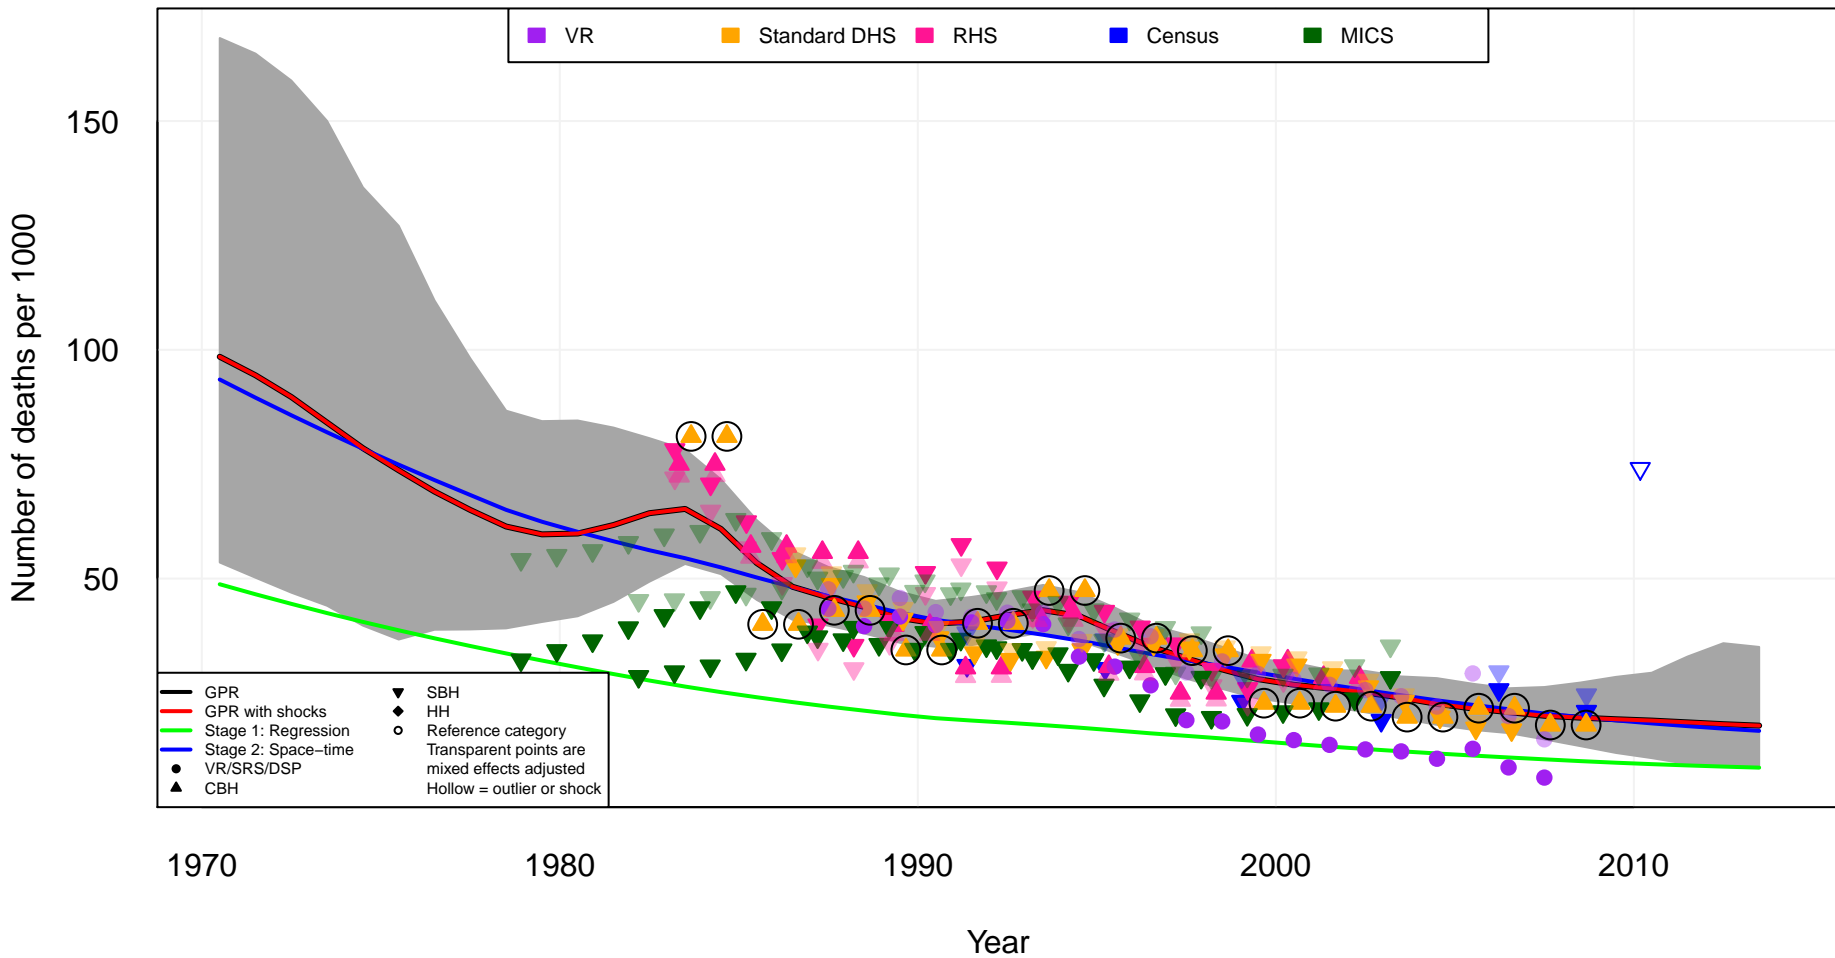



# Europe, Central Bulgaria (BGR)

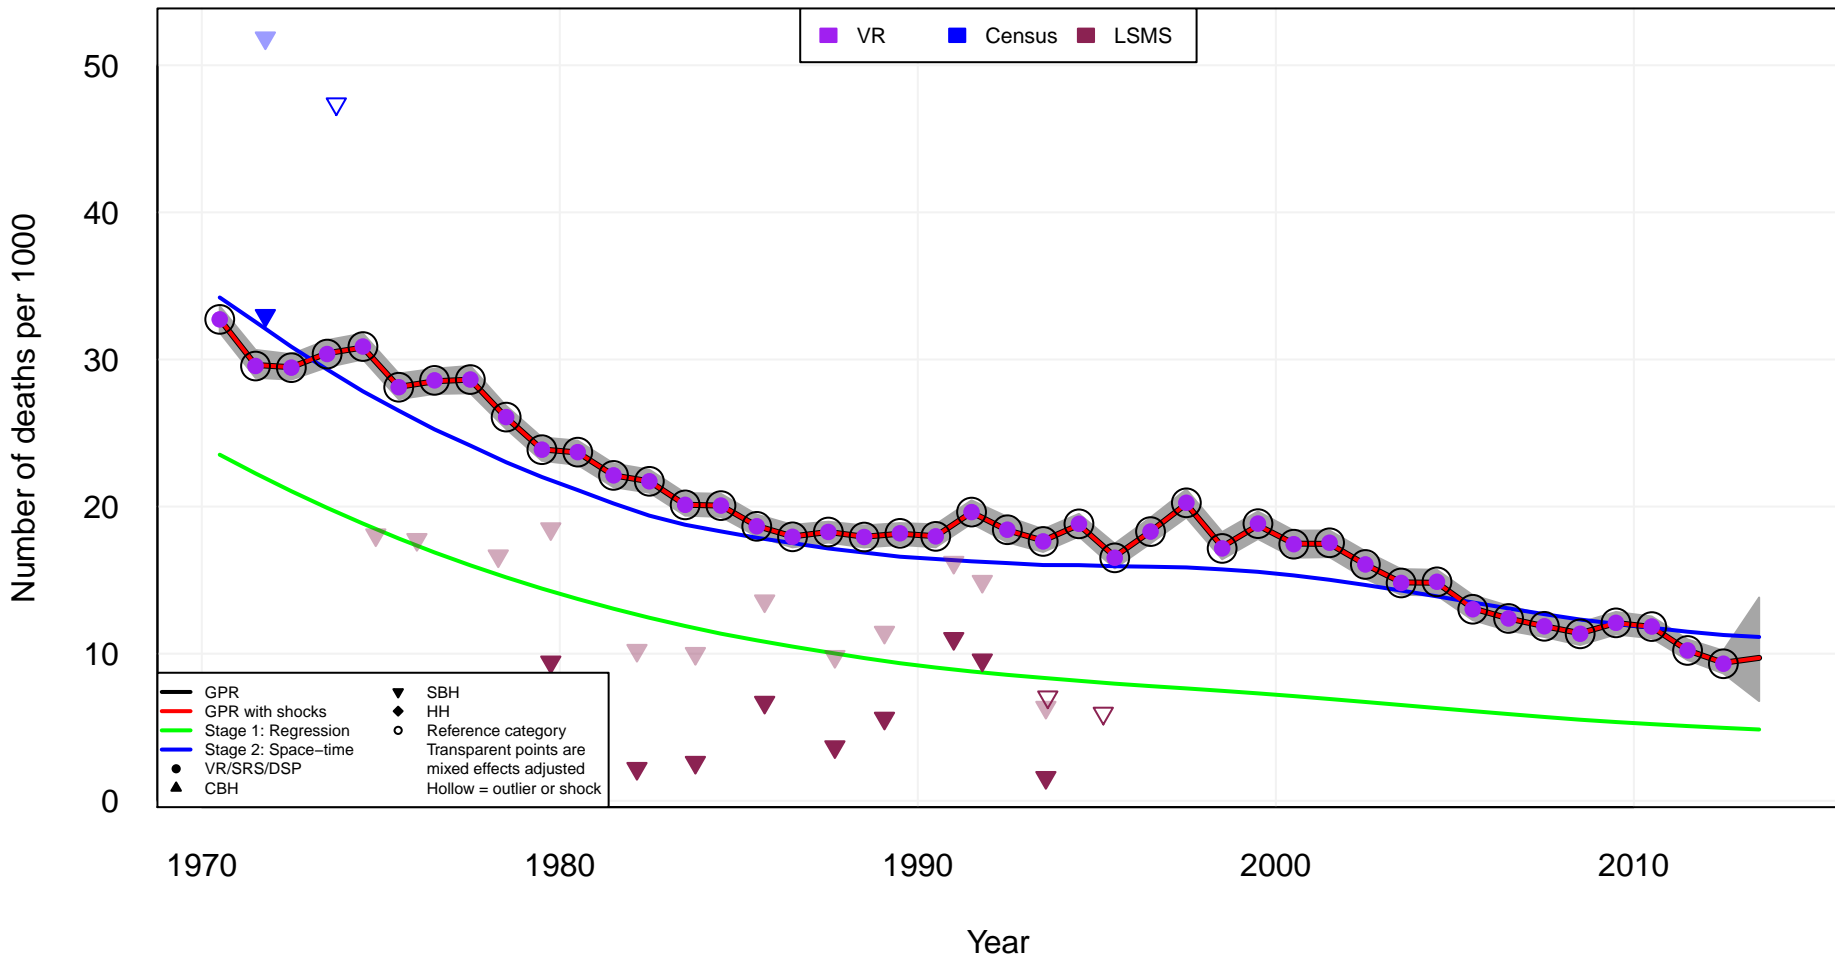

# Europe, Central Bosnia and Herzegovina (BIH)

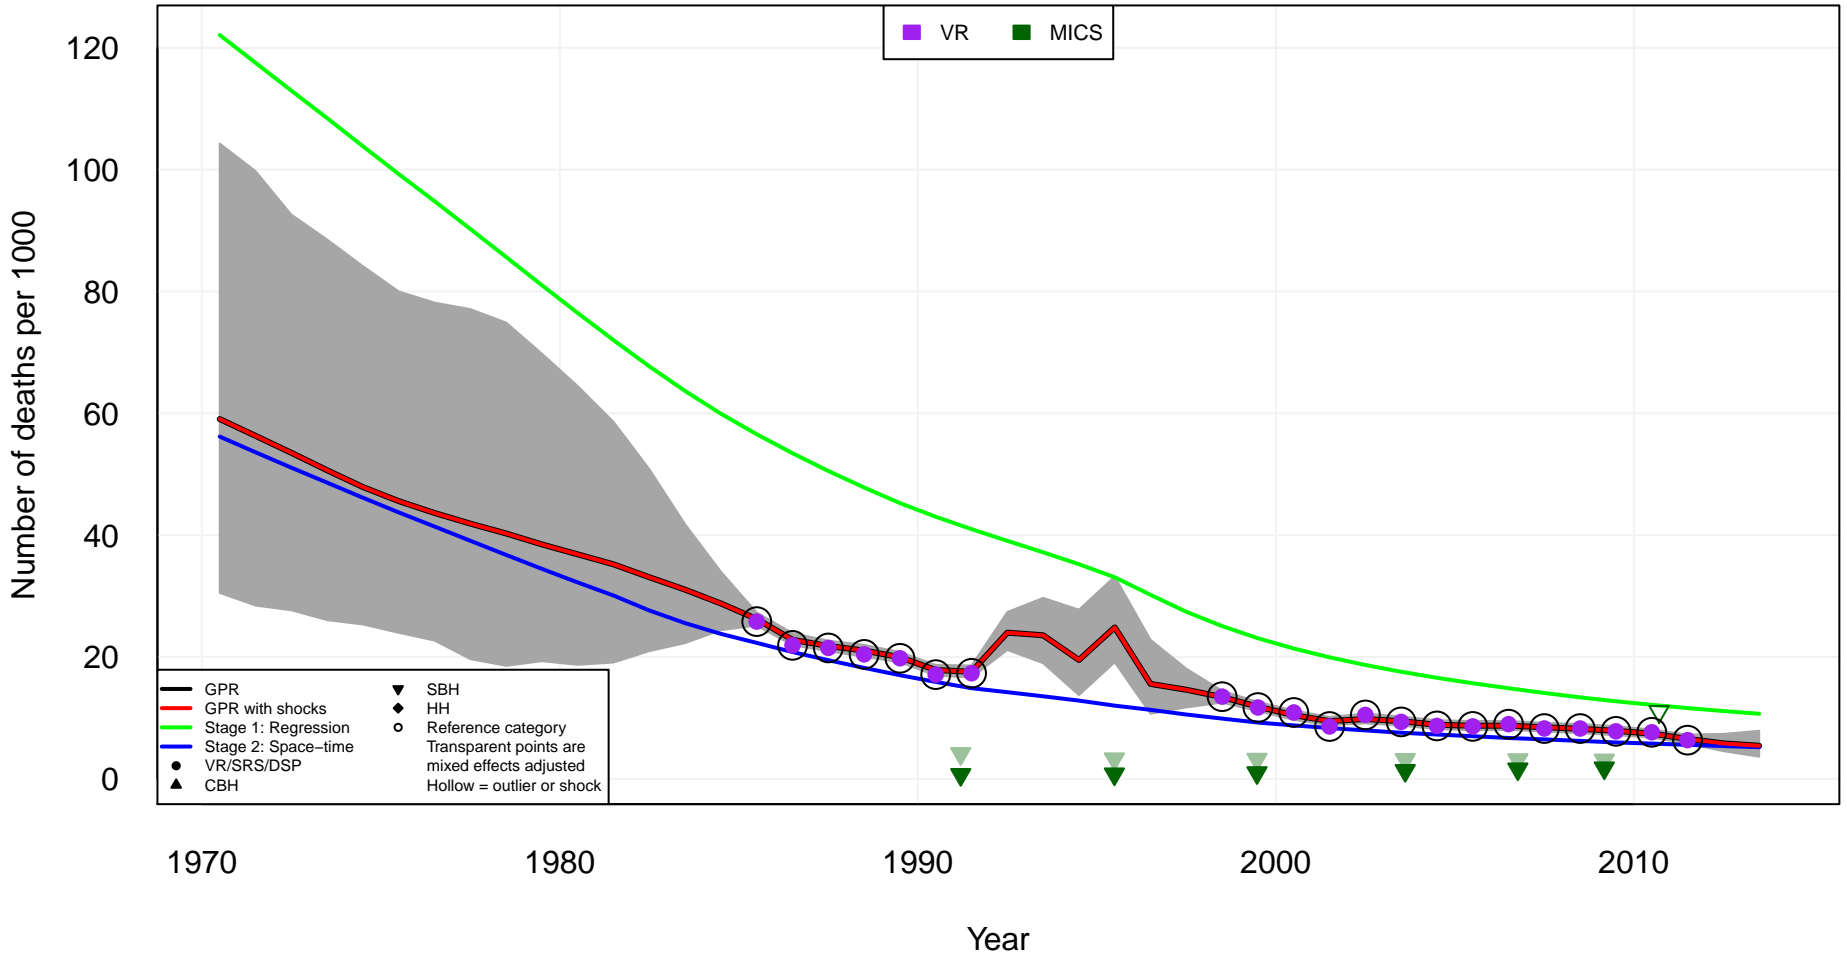

# Europe, Central Czech Republic (CZE)

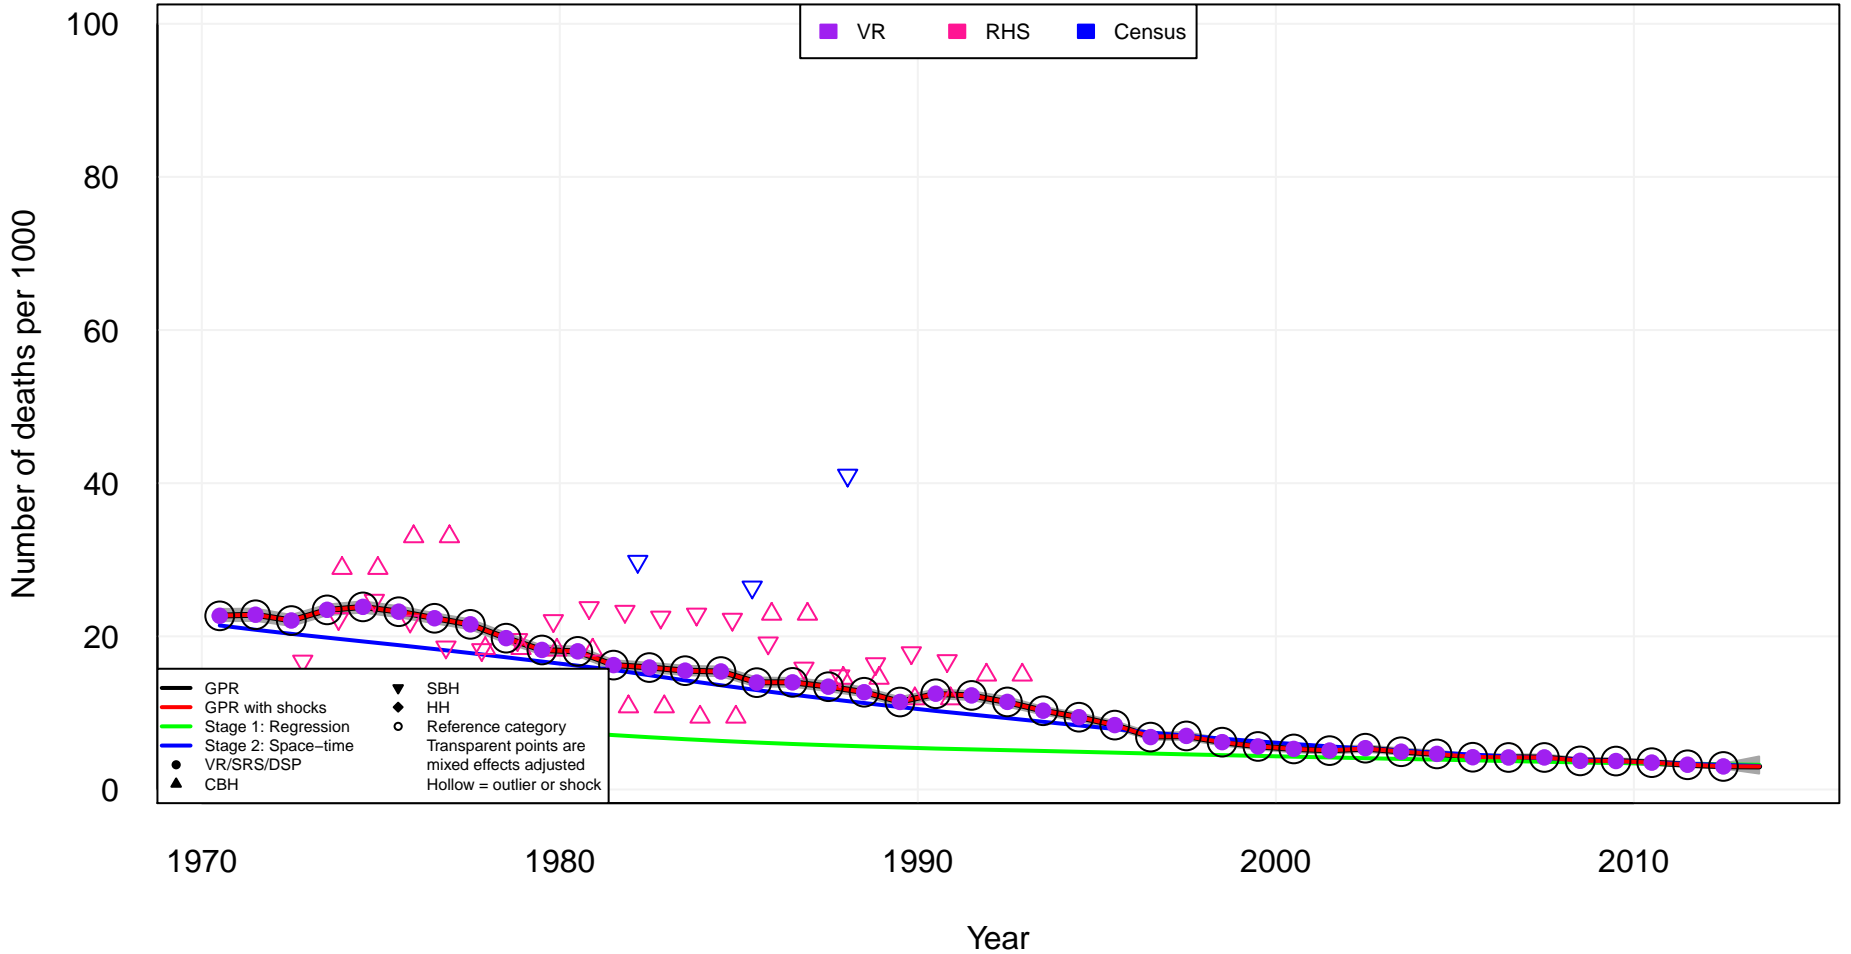

# Europe, Central Croatia (HRV)

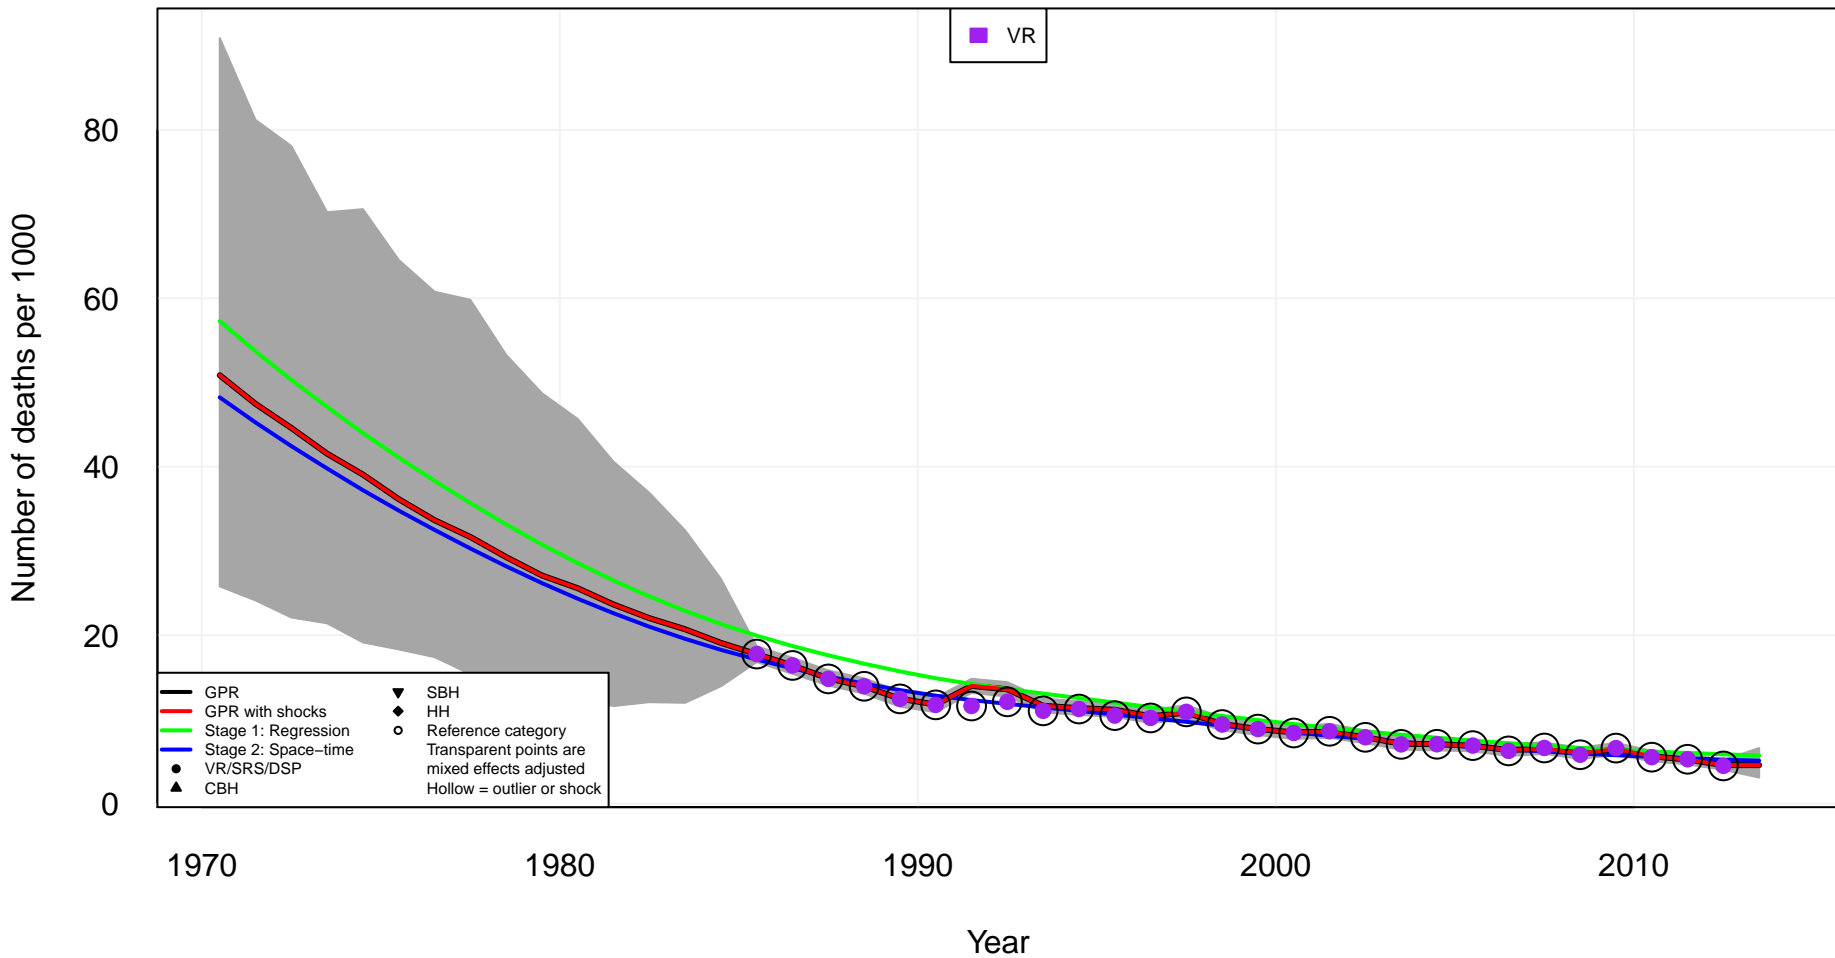

# Europe, Central Hungary (HUN)

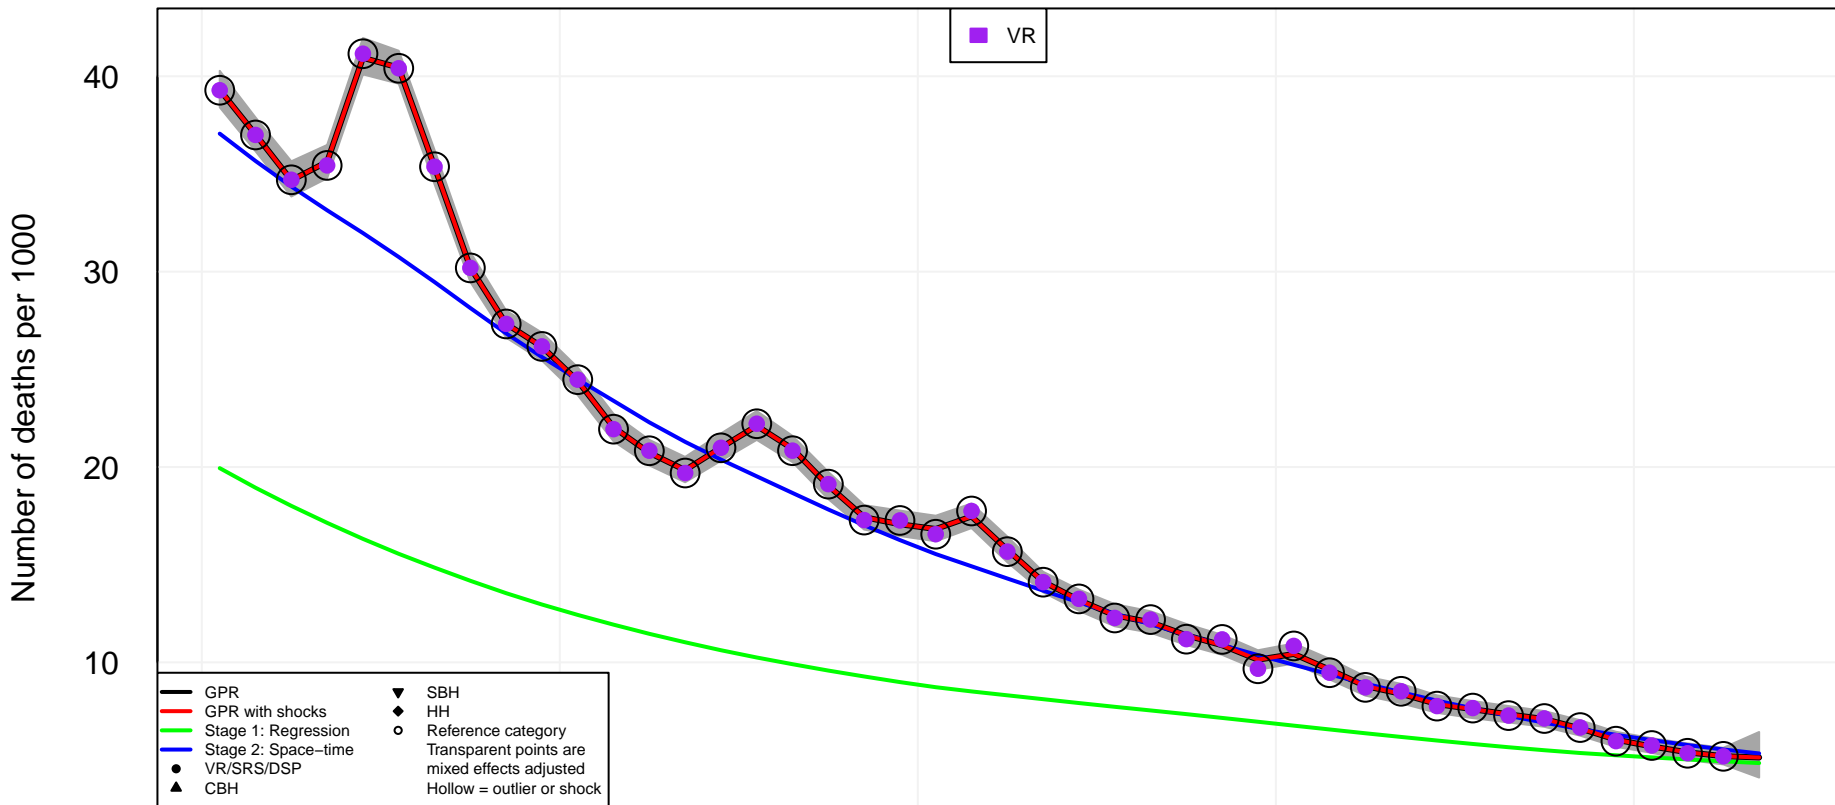

1970

1980

1990

2000

2010

Year



# Europe, Central Montenegro (MNE)

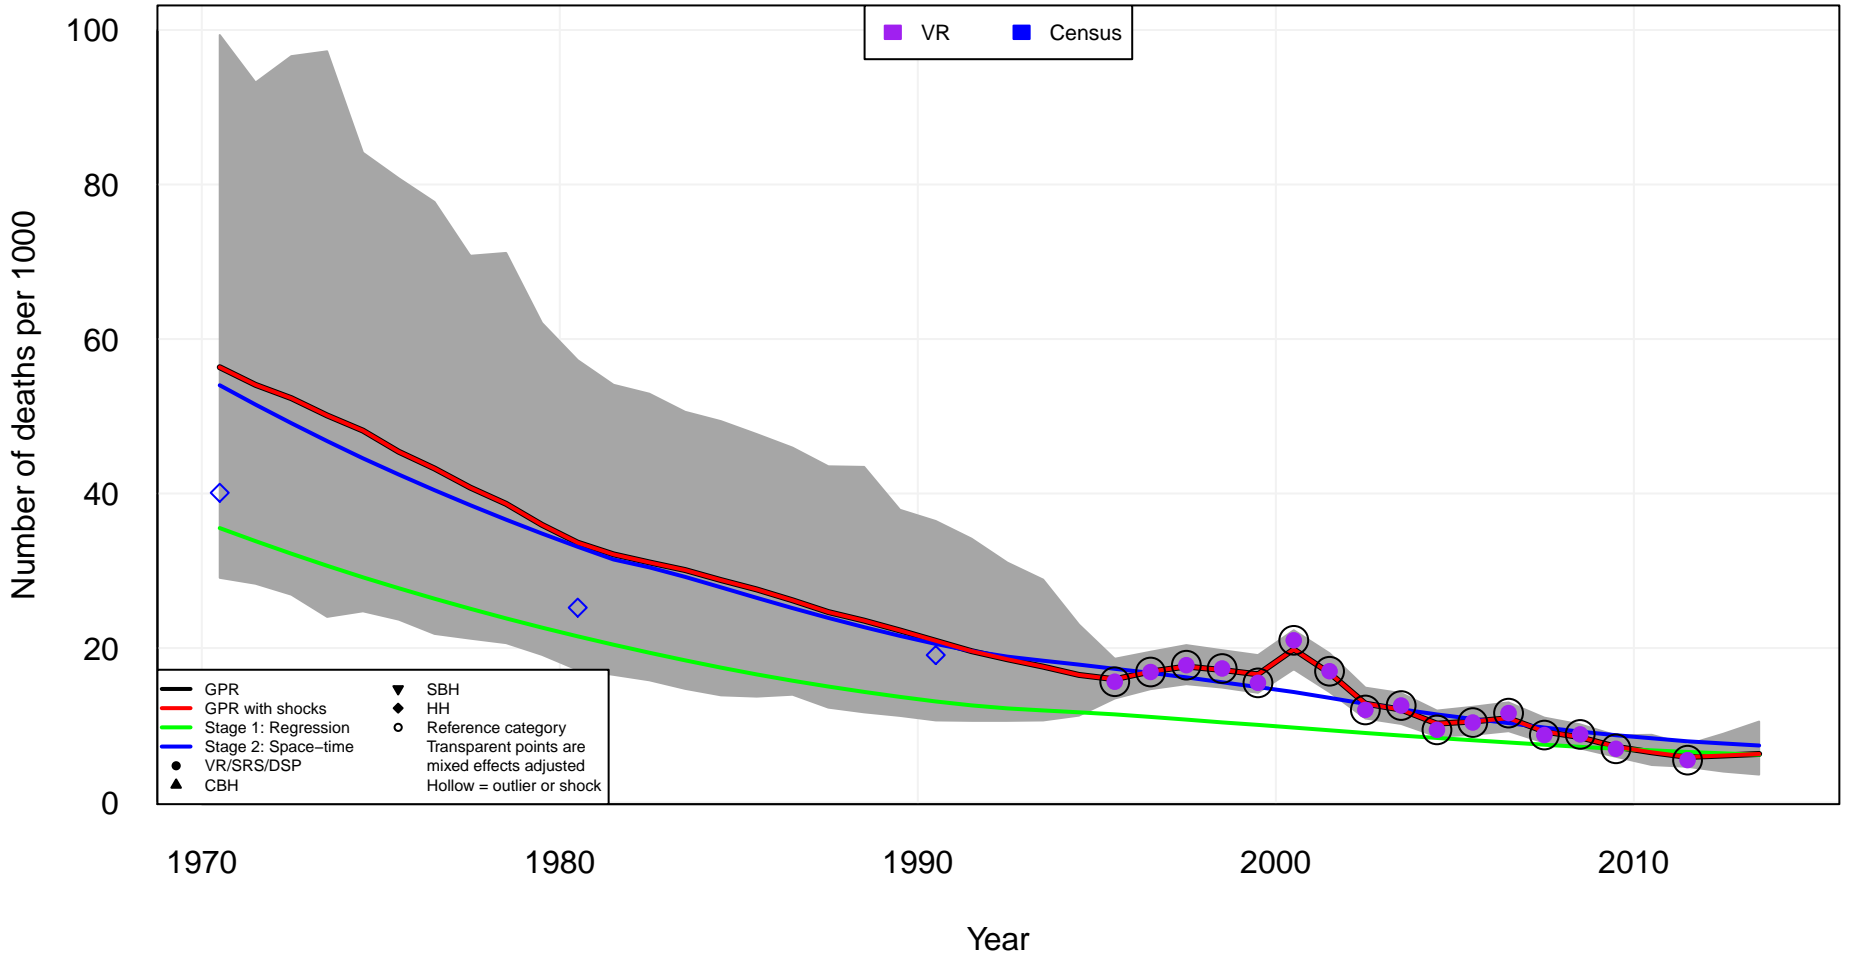

Europe, Central  
Poland (POL)

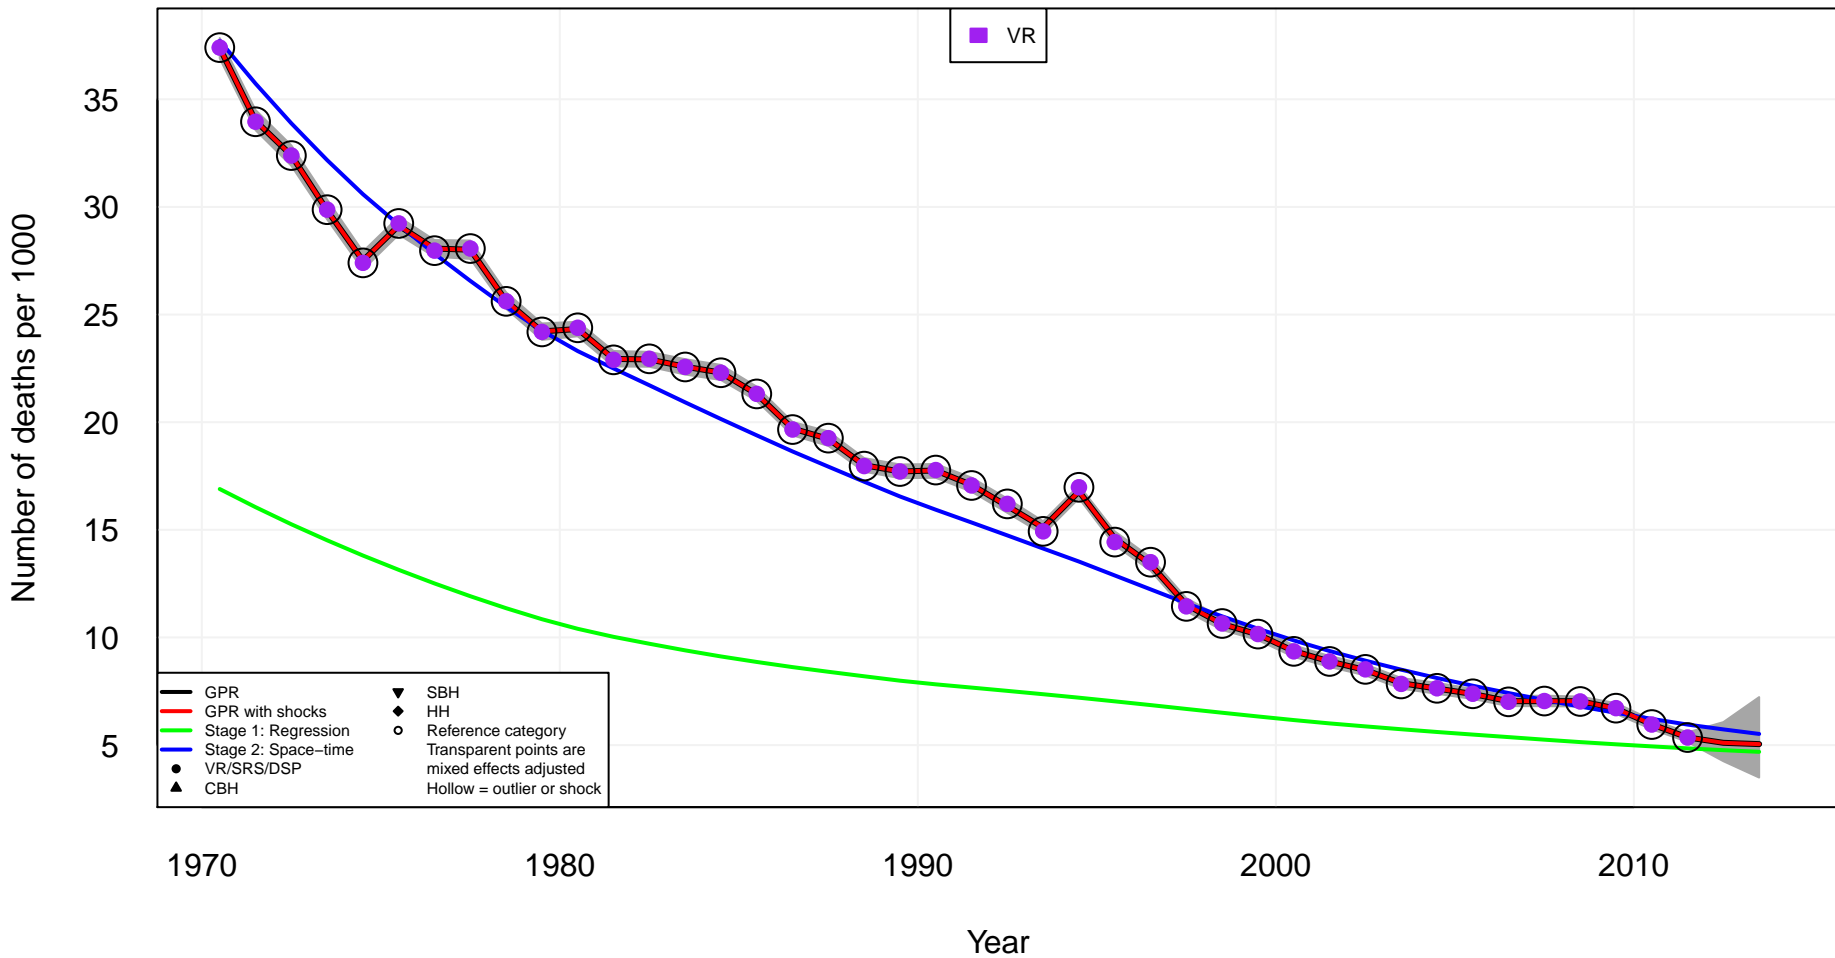



# Europe, Central Romania (ROU)

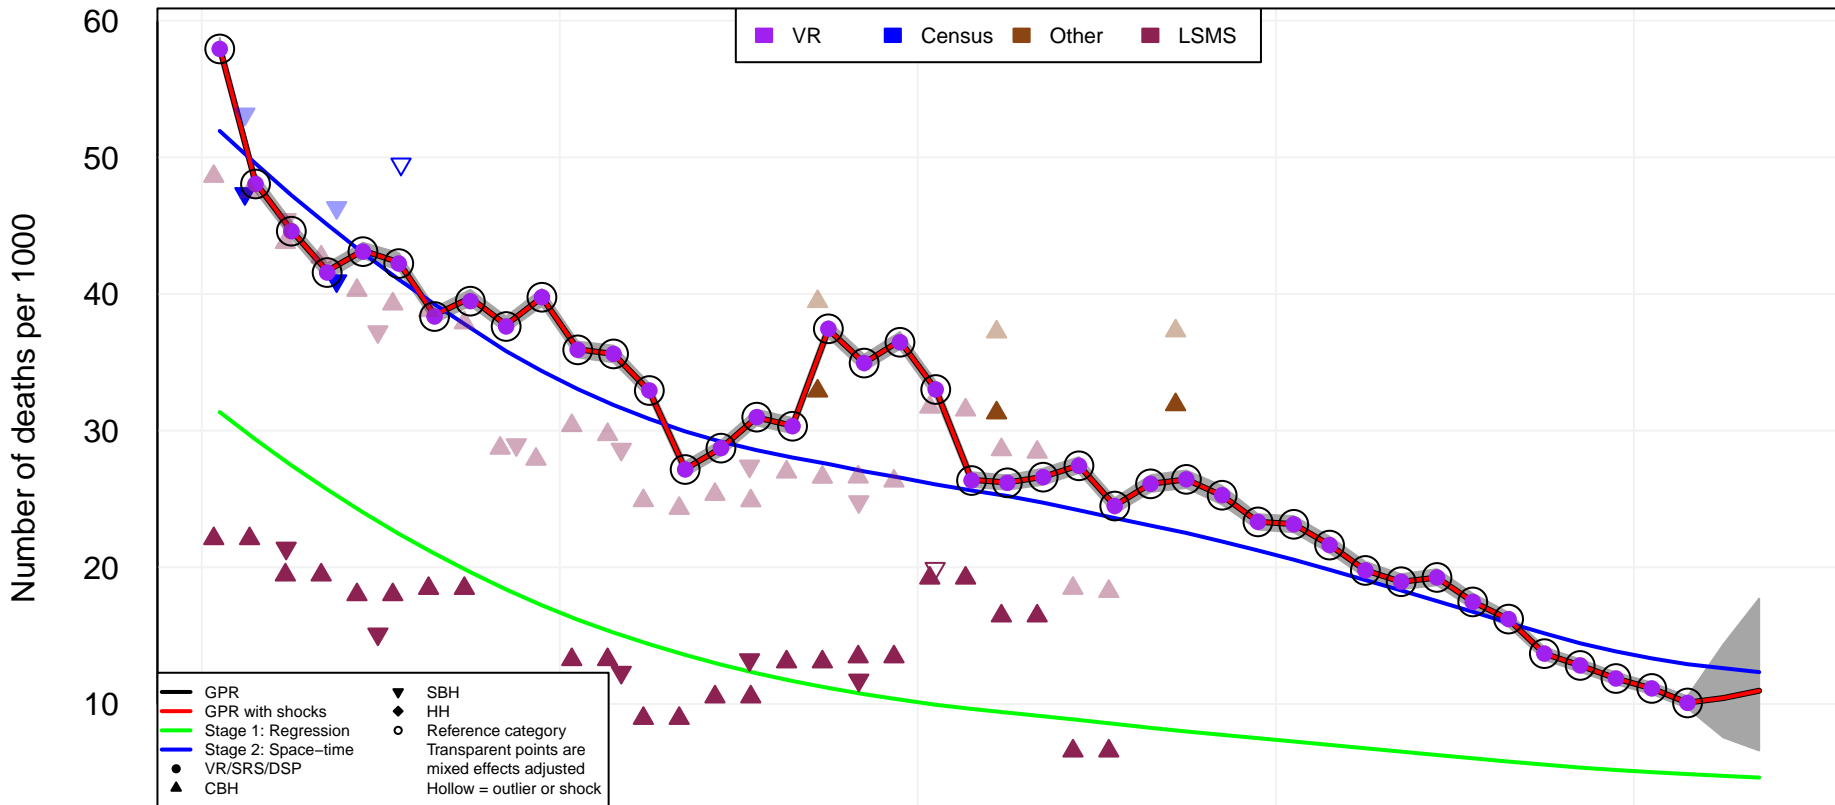

1970

1980

1990

2000

2010

Year

# Europe, Central Serbia (SRB)

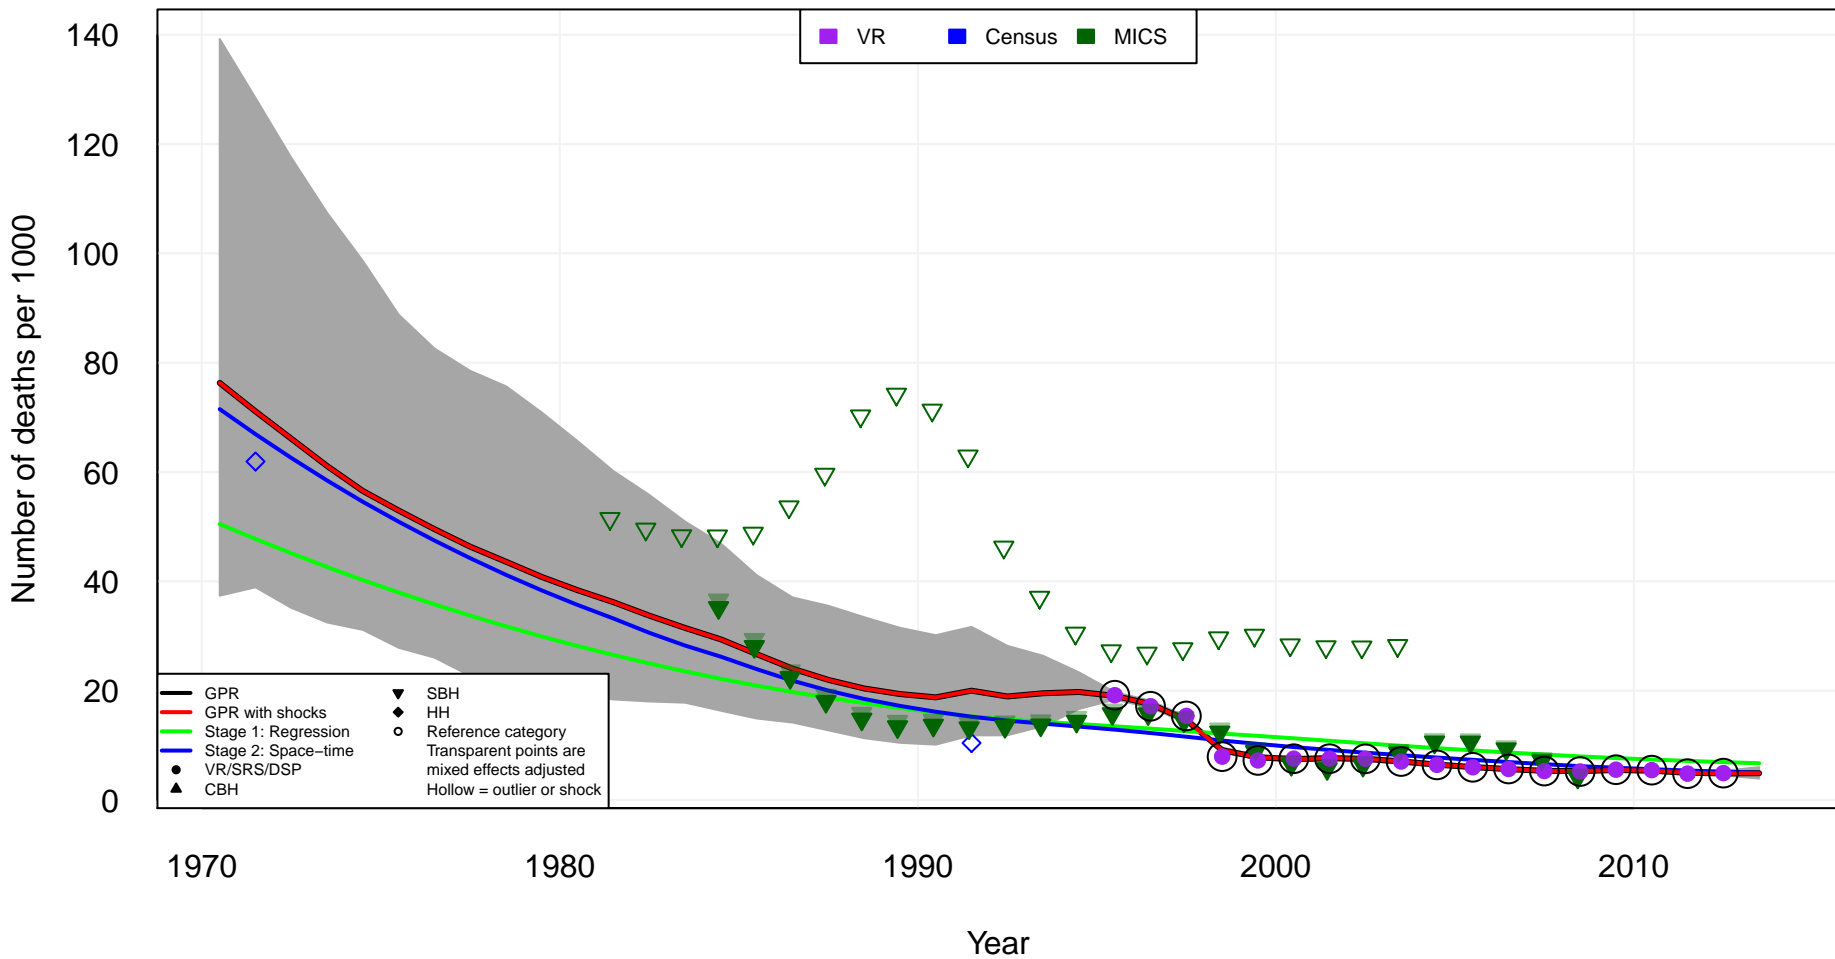

# Europe, Central Slovakia (SVK)

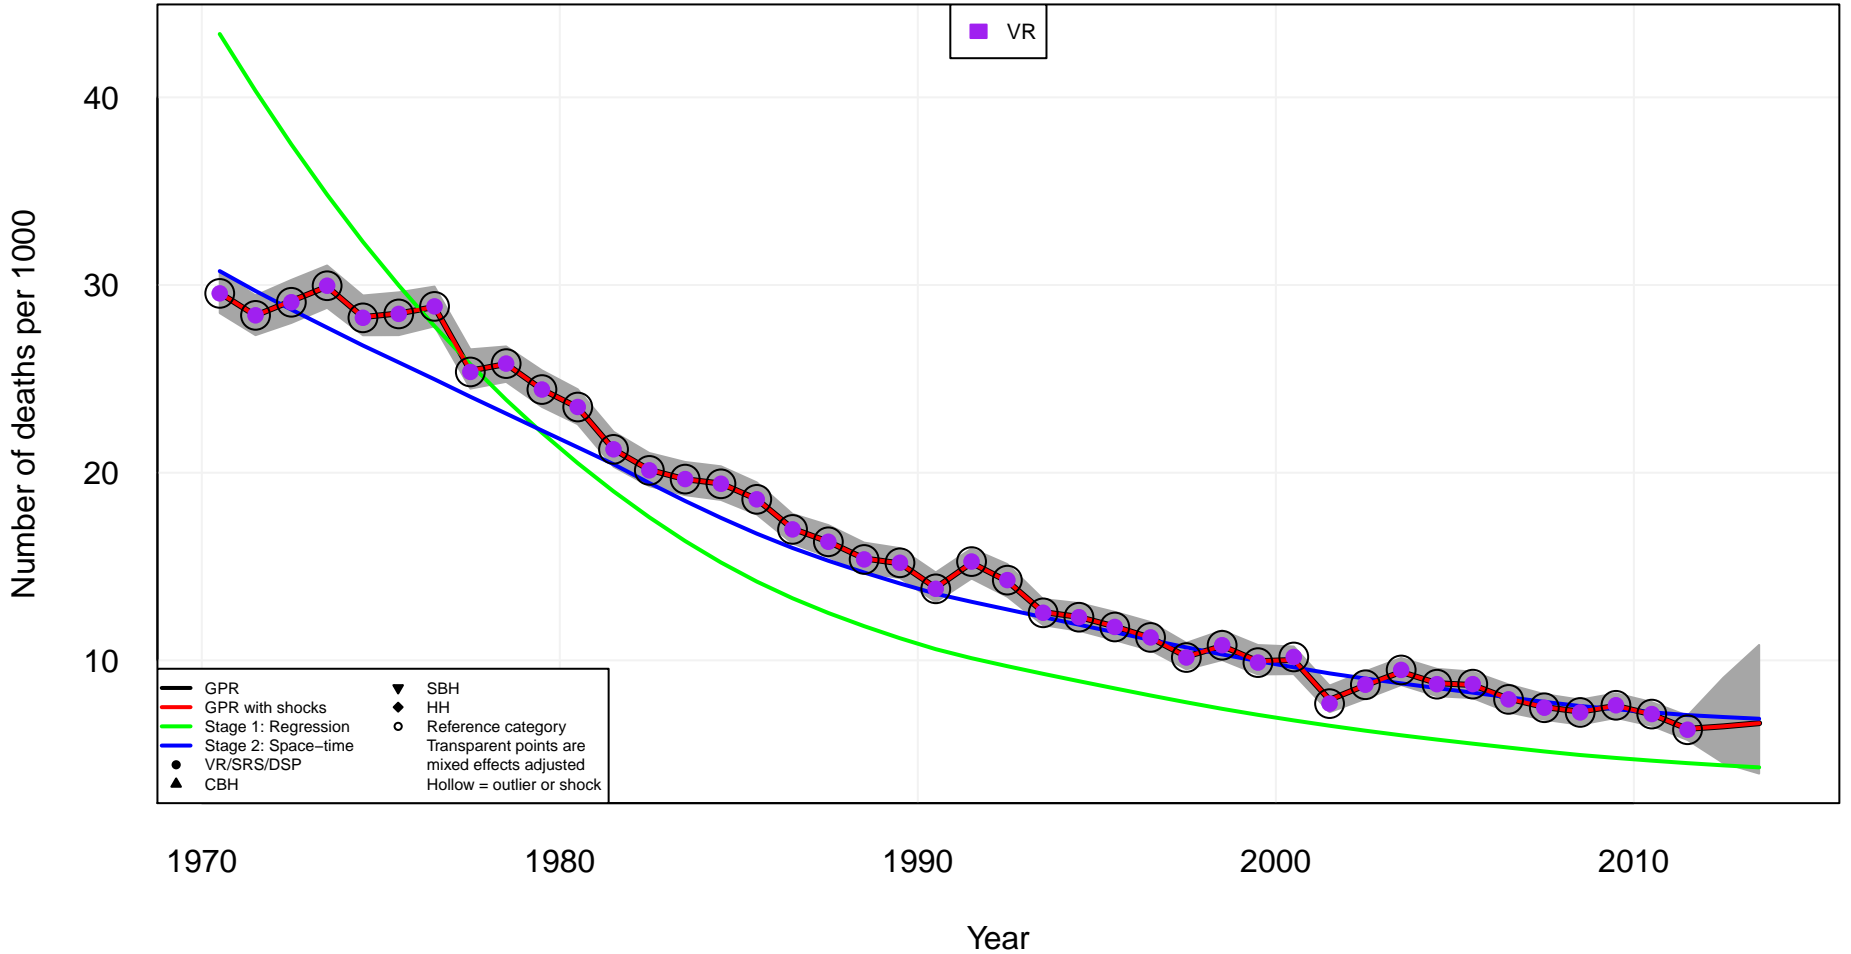

# Europe, Central Slovenia (SVN)

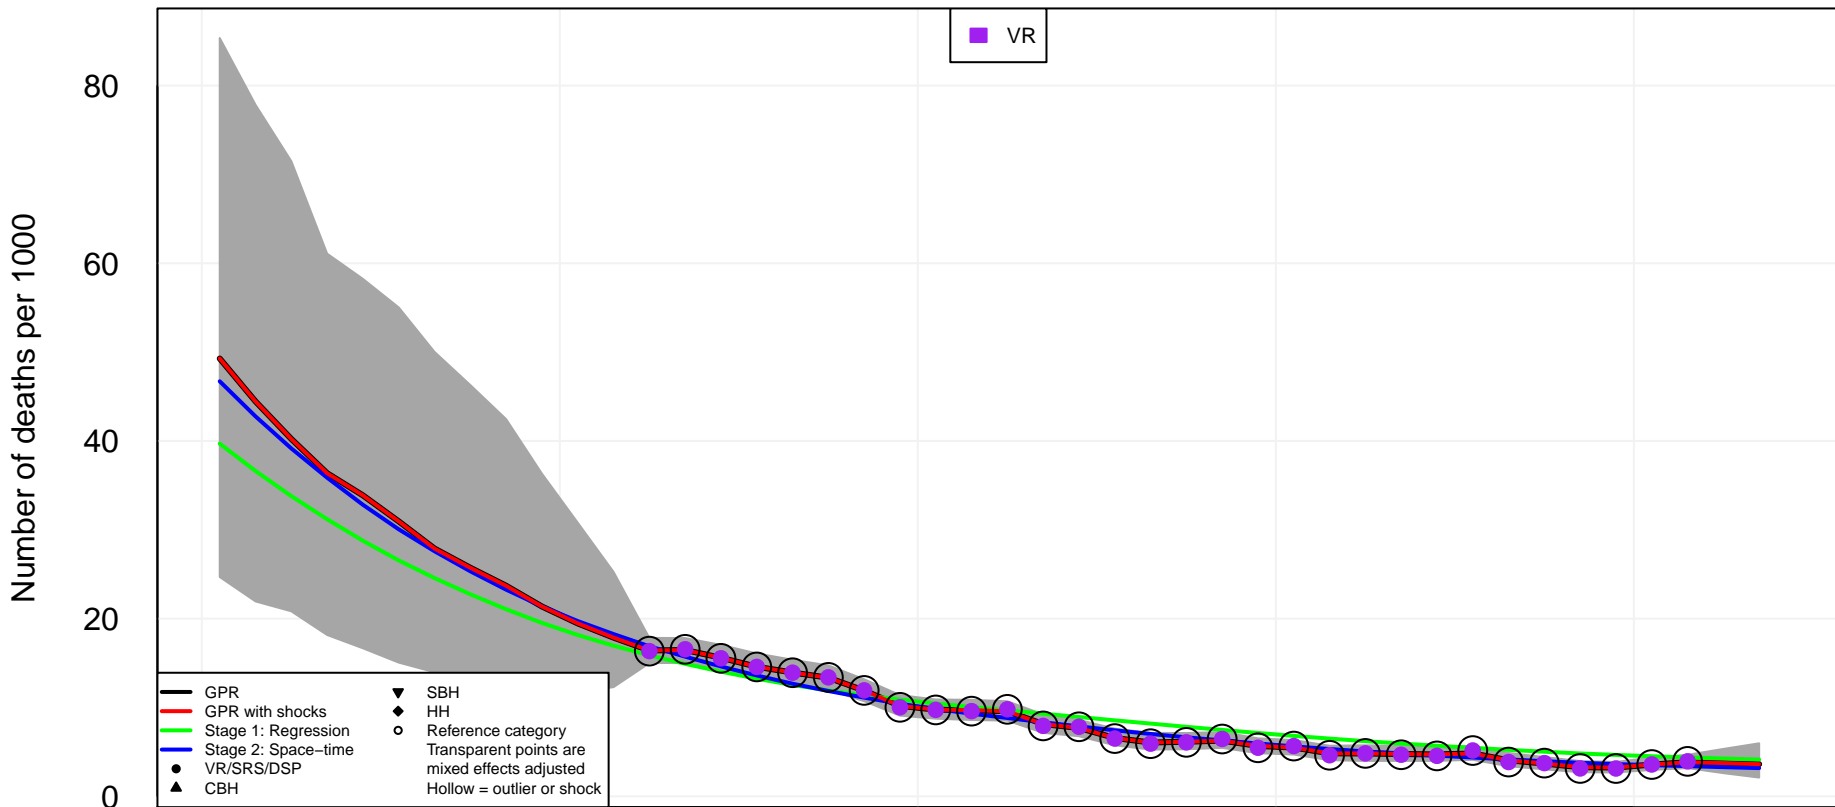

1970

1980

1990

2000

2010

Year

# Europe, Eastern Belarus (BLR)

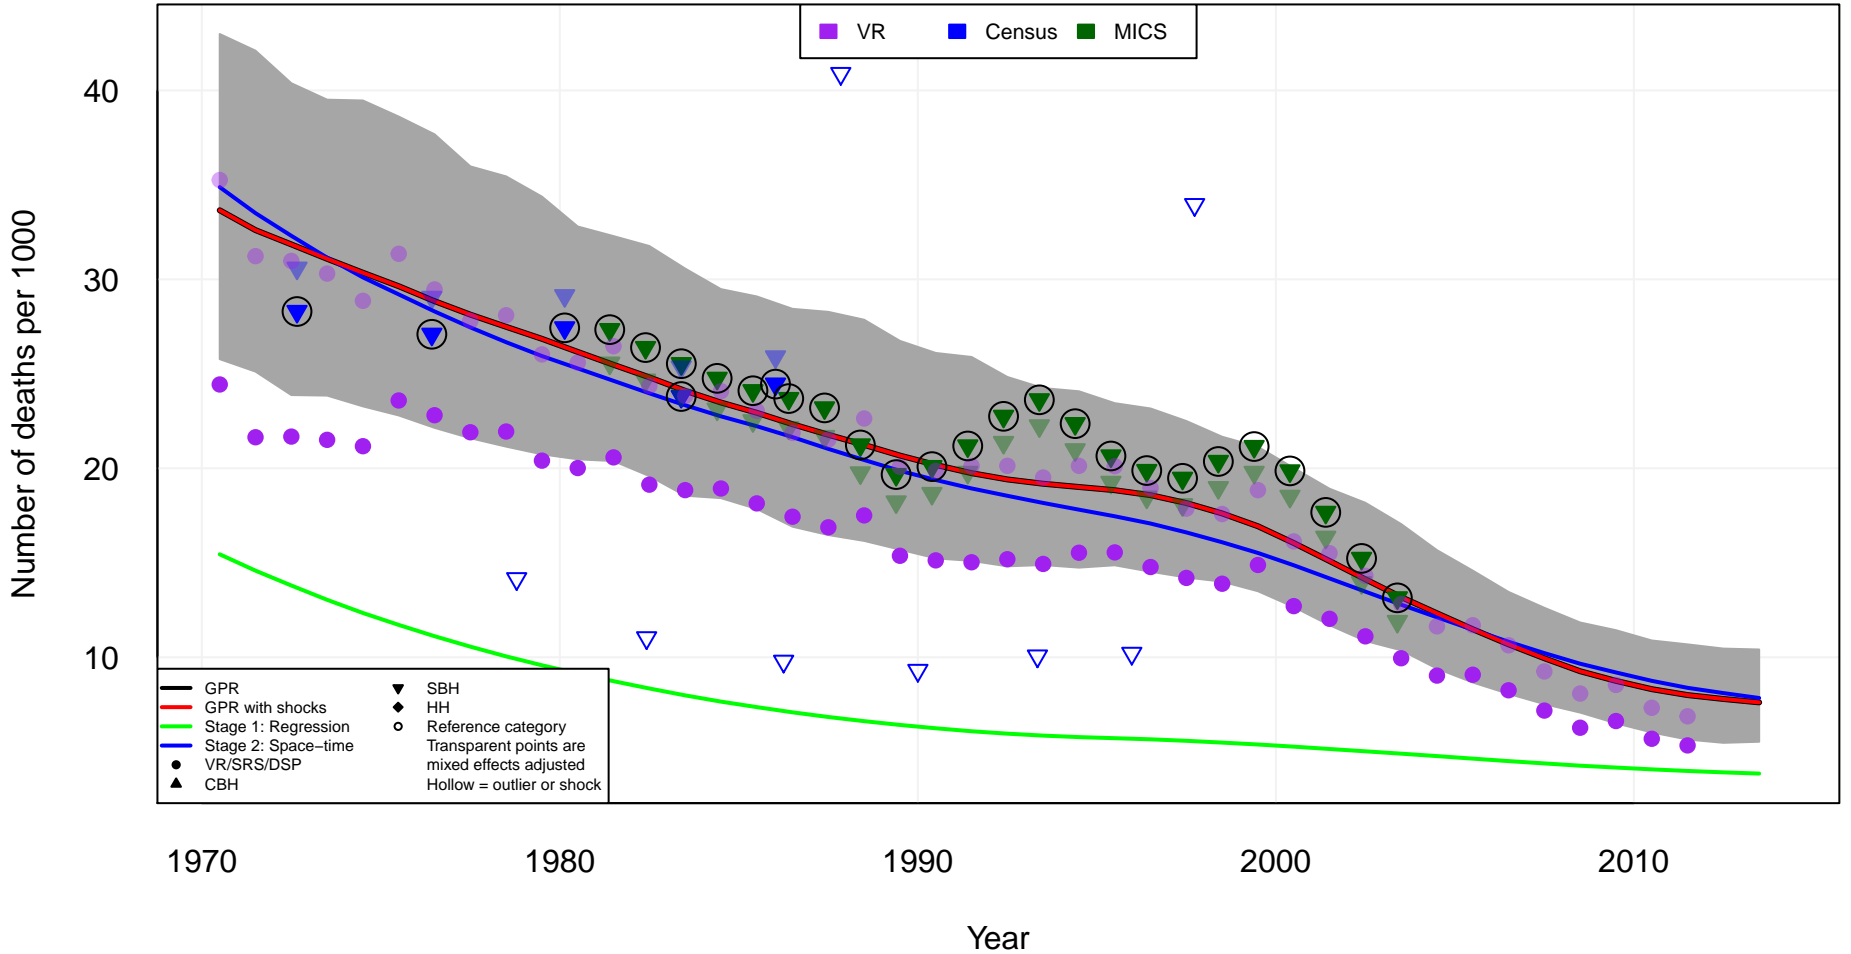

# Europe, Eastern Estonia (EST)

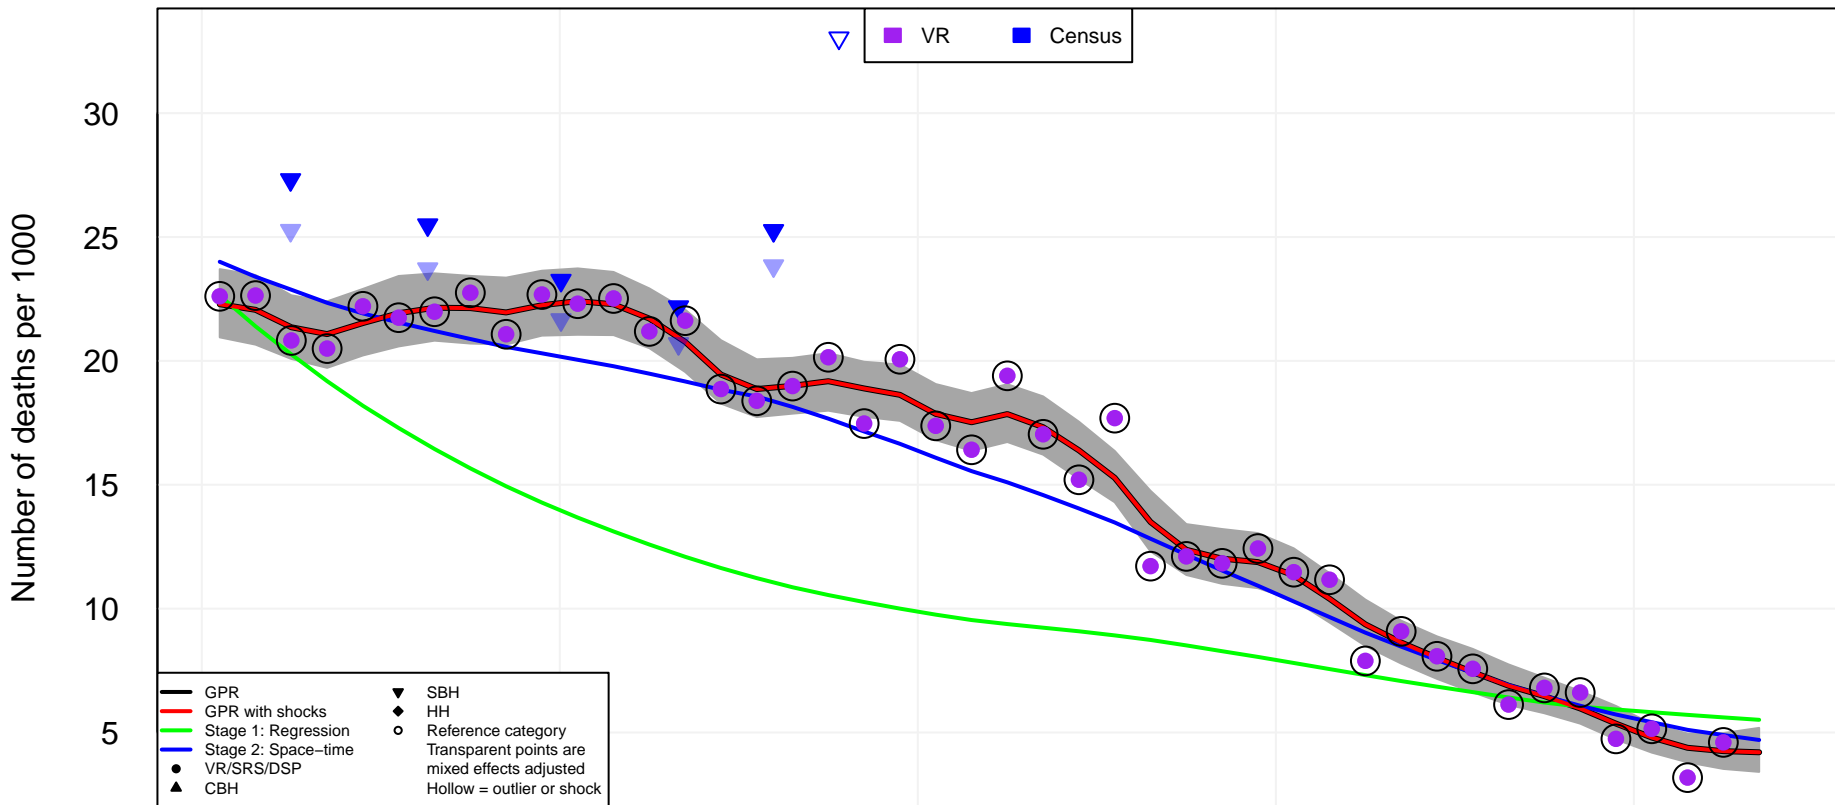

— GPR  
 — GPR with shocks  
 — Stage 1: Regression  
 — Stage 2: Space-time  
 ● VR/SRS/DSP  
 ▲ CBH  
 ▼ SBH  
 ◆ HH  
 ○ Reference category  
 Transparent points are mixed effects adjusted  
 Hollow = outlier or shock

▽ VR  
 ■ Census

1970 1980 1990 2000 2010

Year

Number of deaths per 1000

30

25

20

15

10

5

# Europe, Eastern Lithuania (LTU)

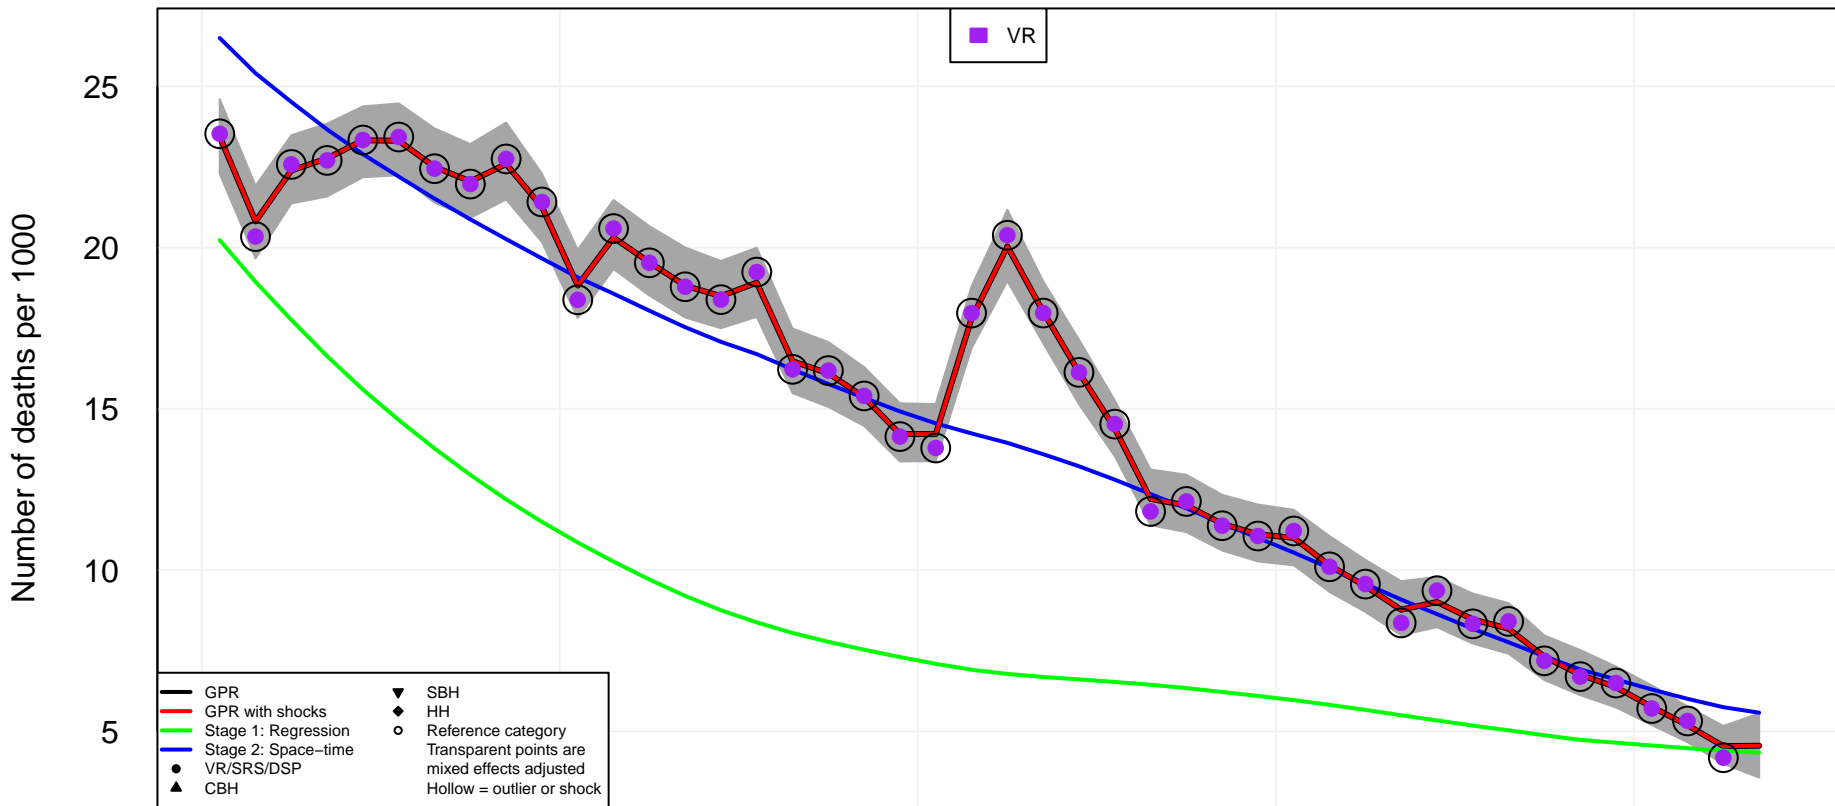

# Europe, Eastern Latvia (LVA)

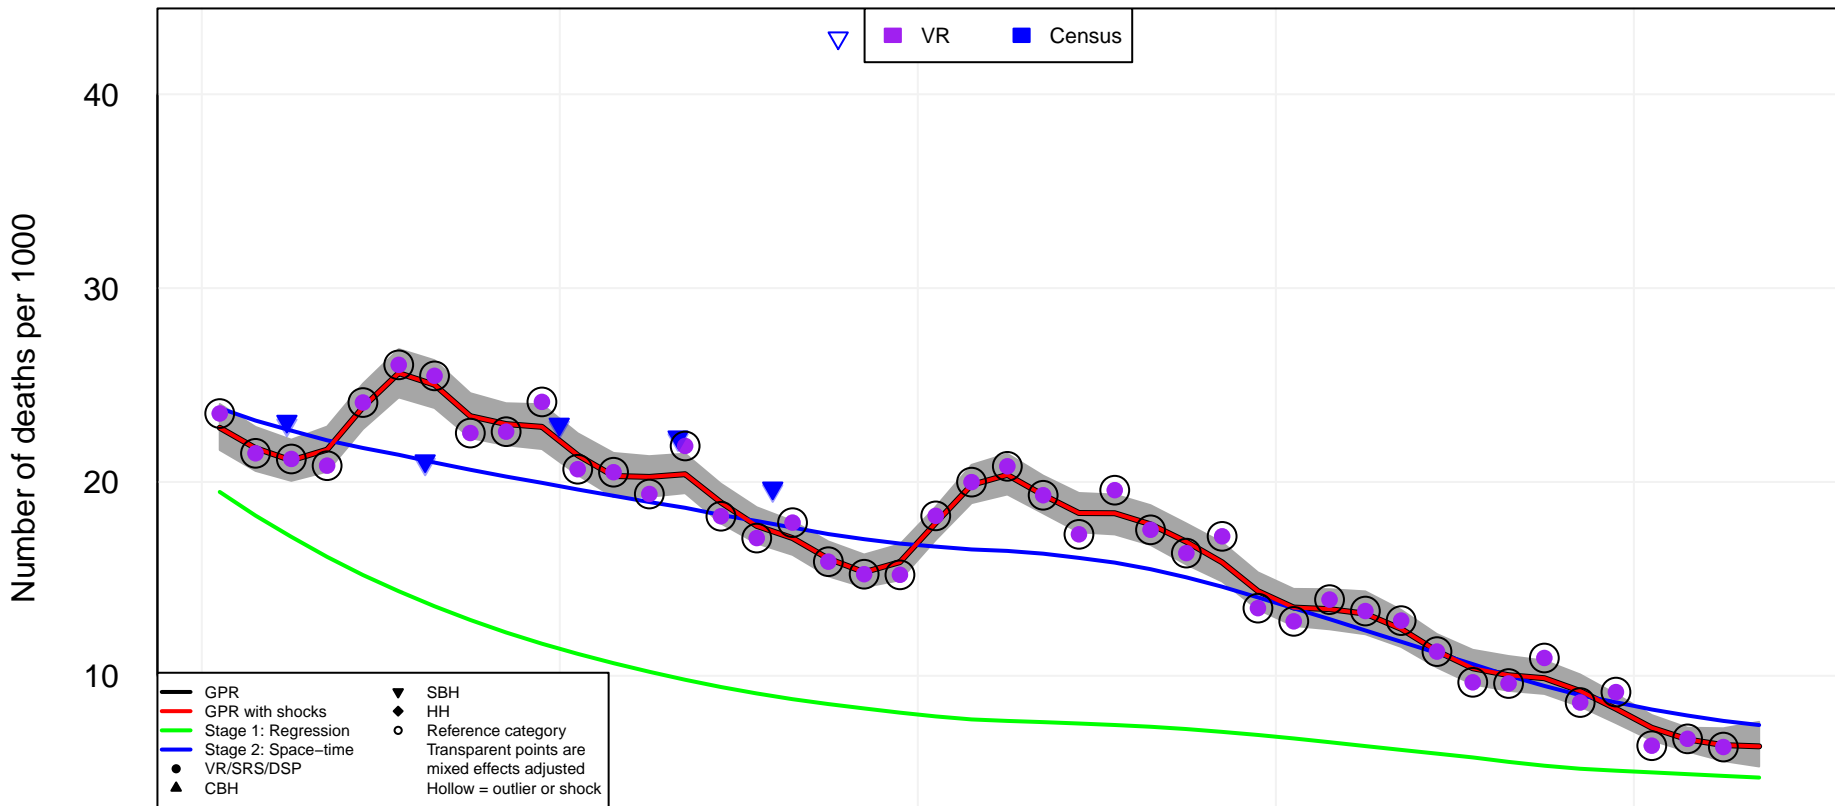



# Europe, Eastern Moldova (MDA)

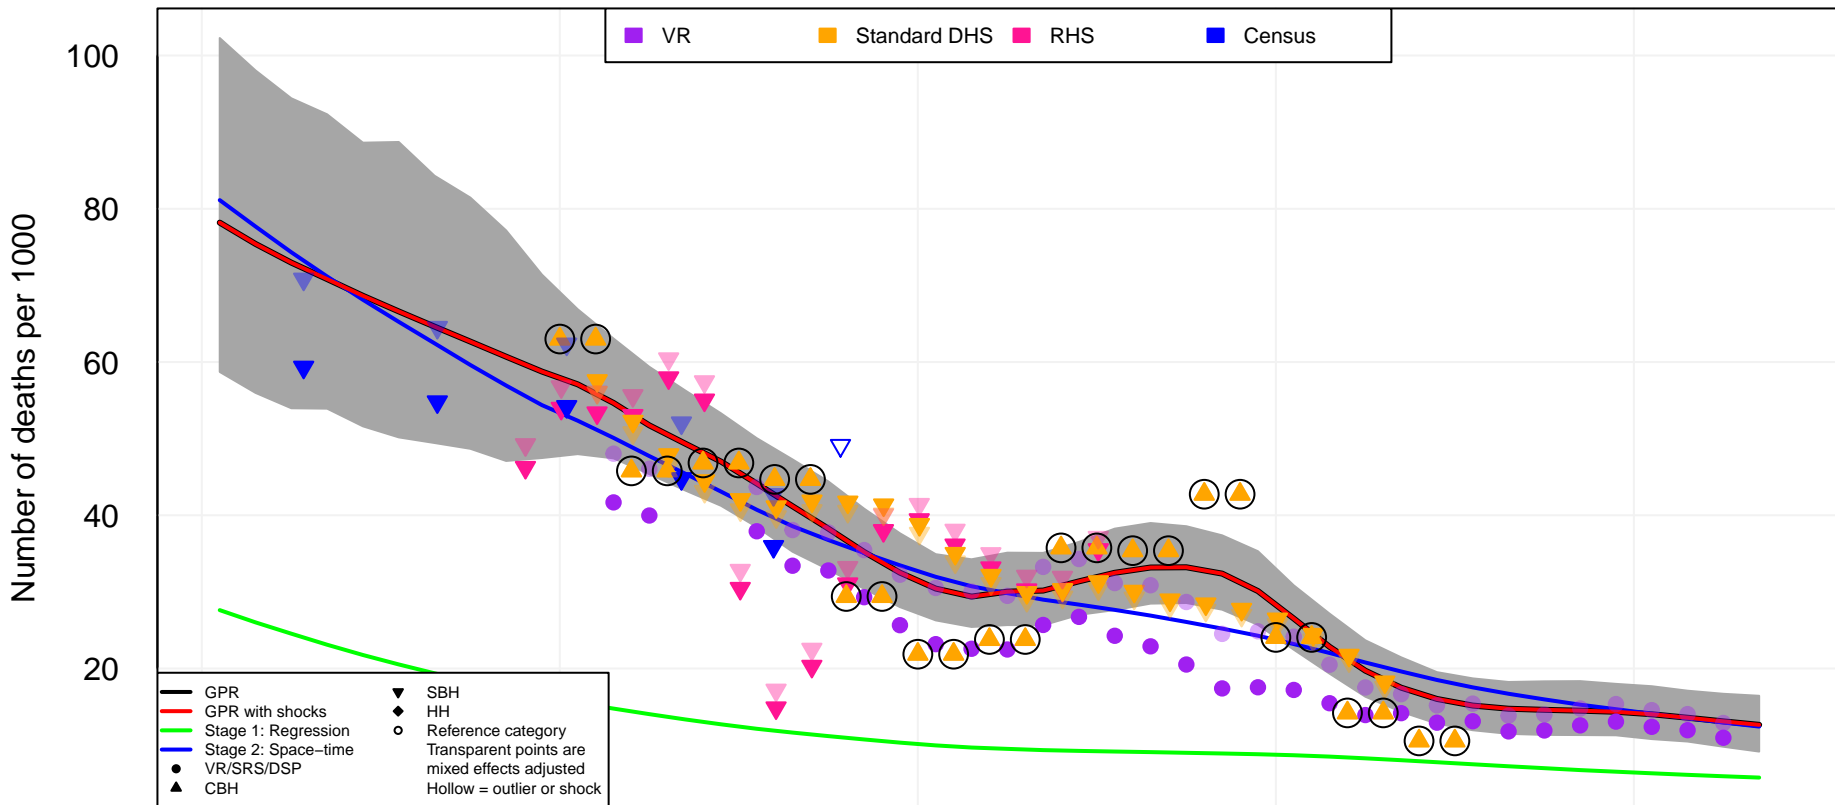

1970

1980

1990

2000

2010

Year



# Europe, Eastern Ukraine (UKR)

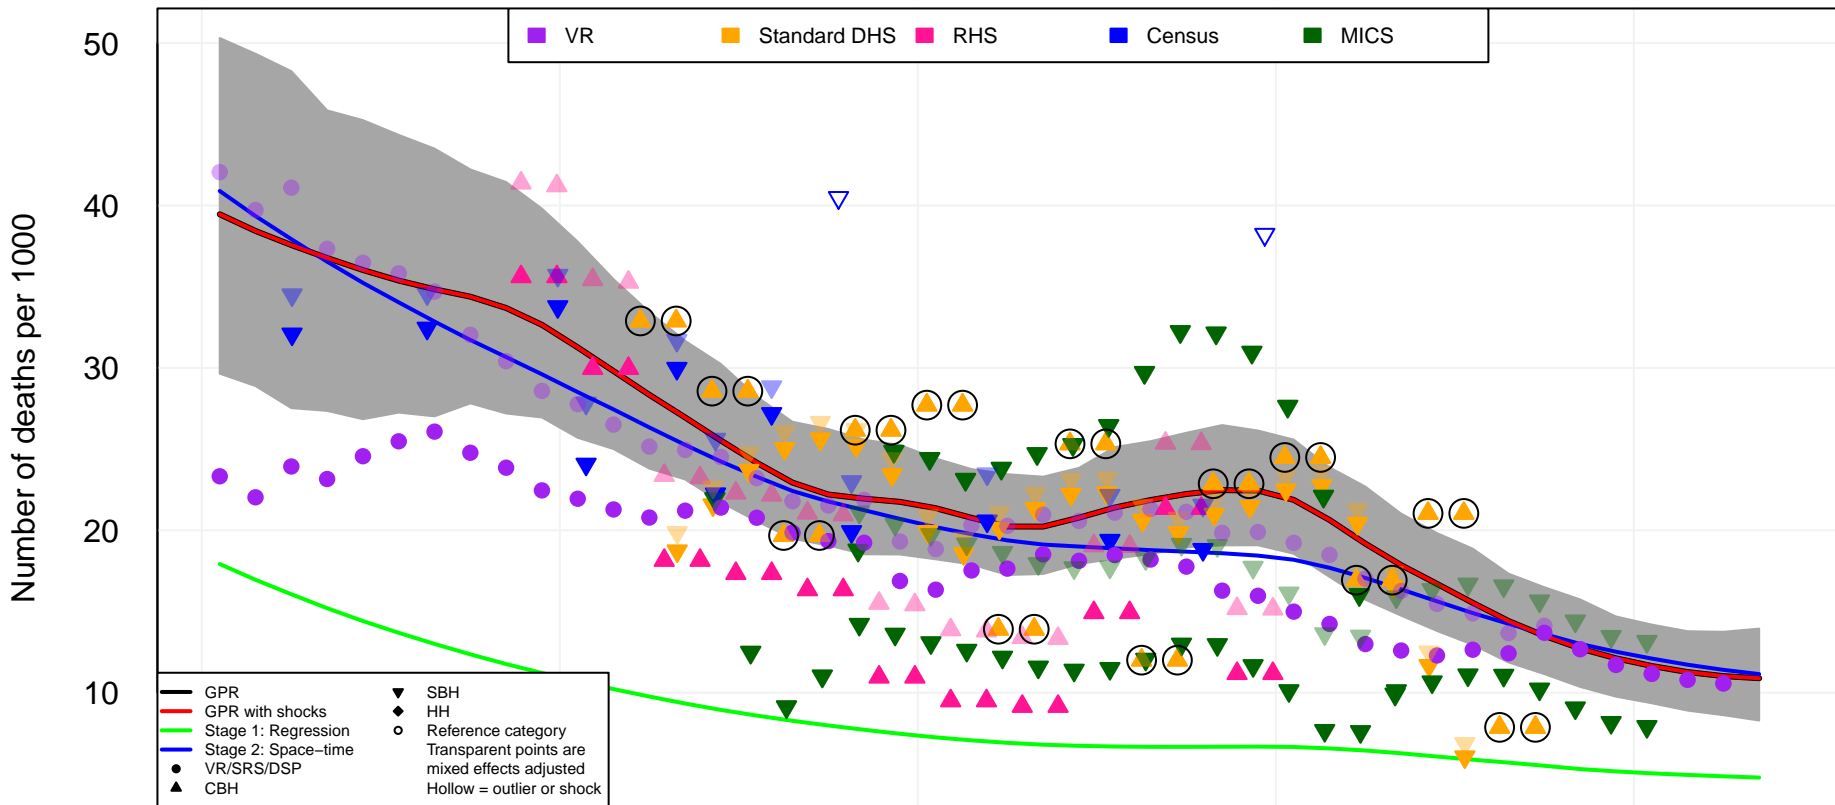

1970

1980

1990

2000

2010

Year

Europe, Western  
Andorra (AND)

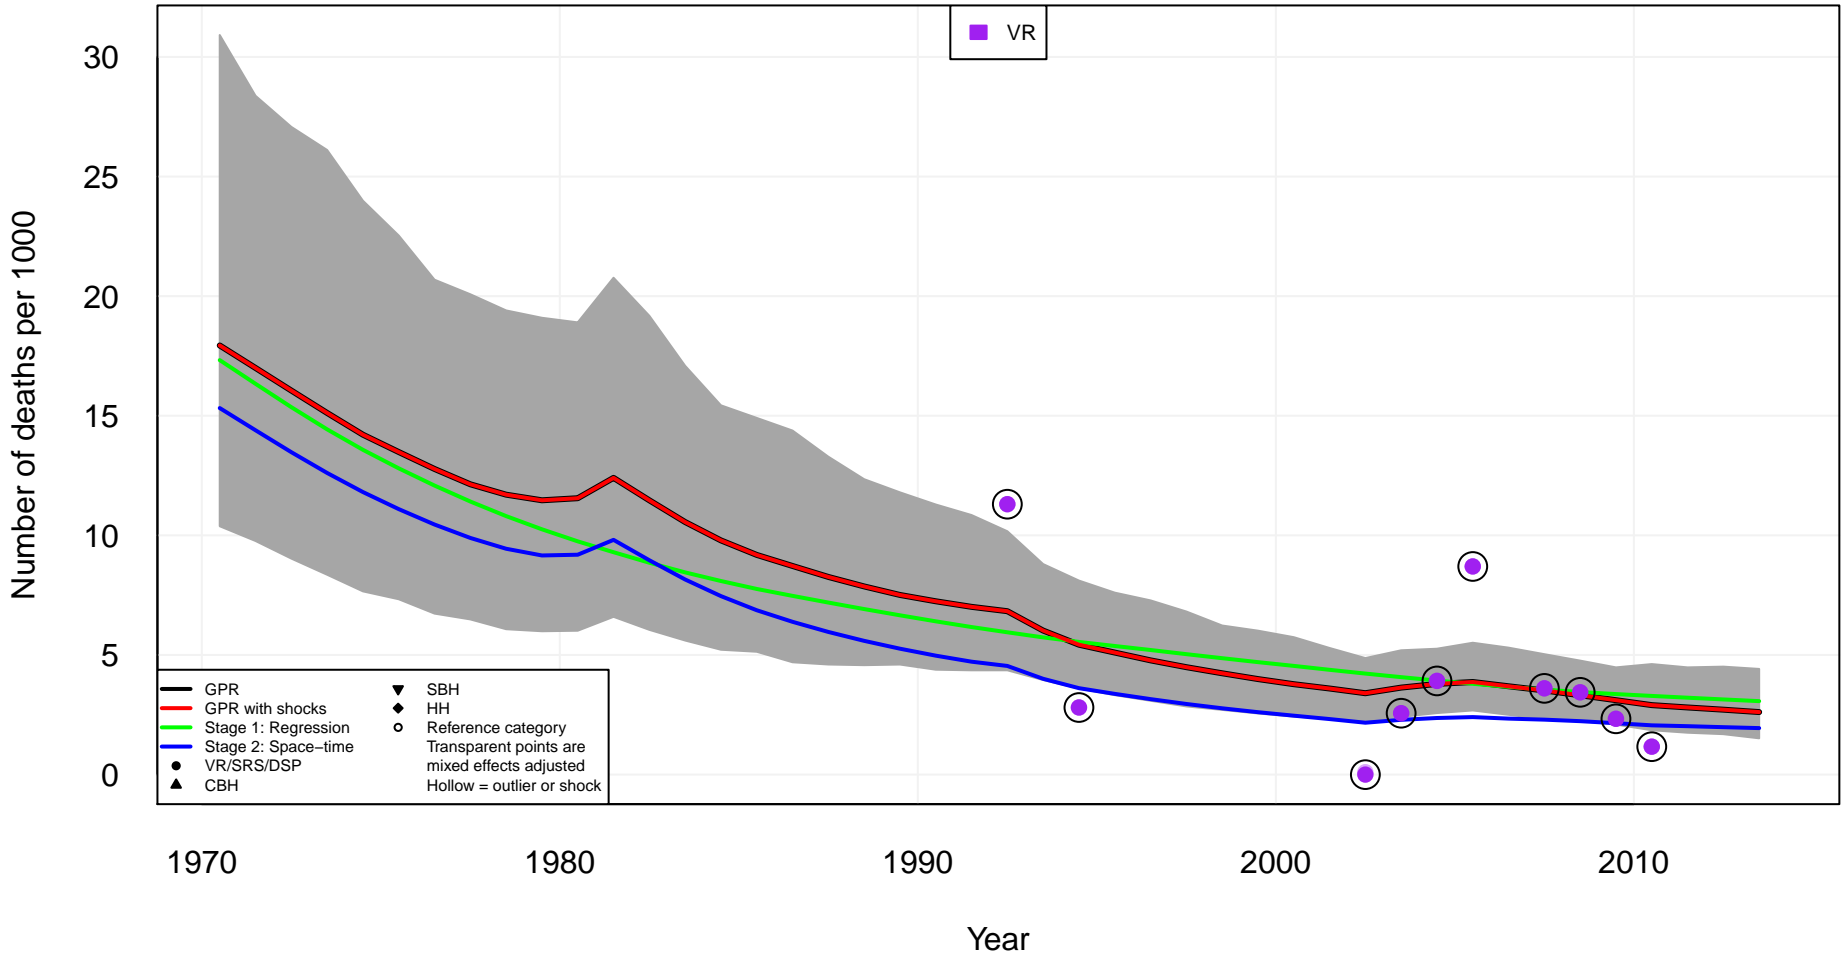

# Europe, Western Austria (AUT)

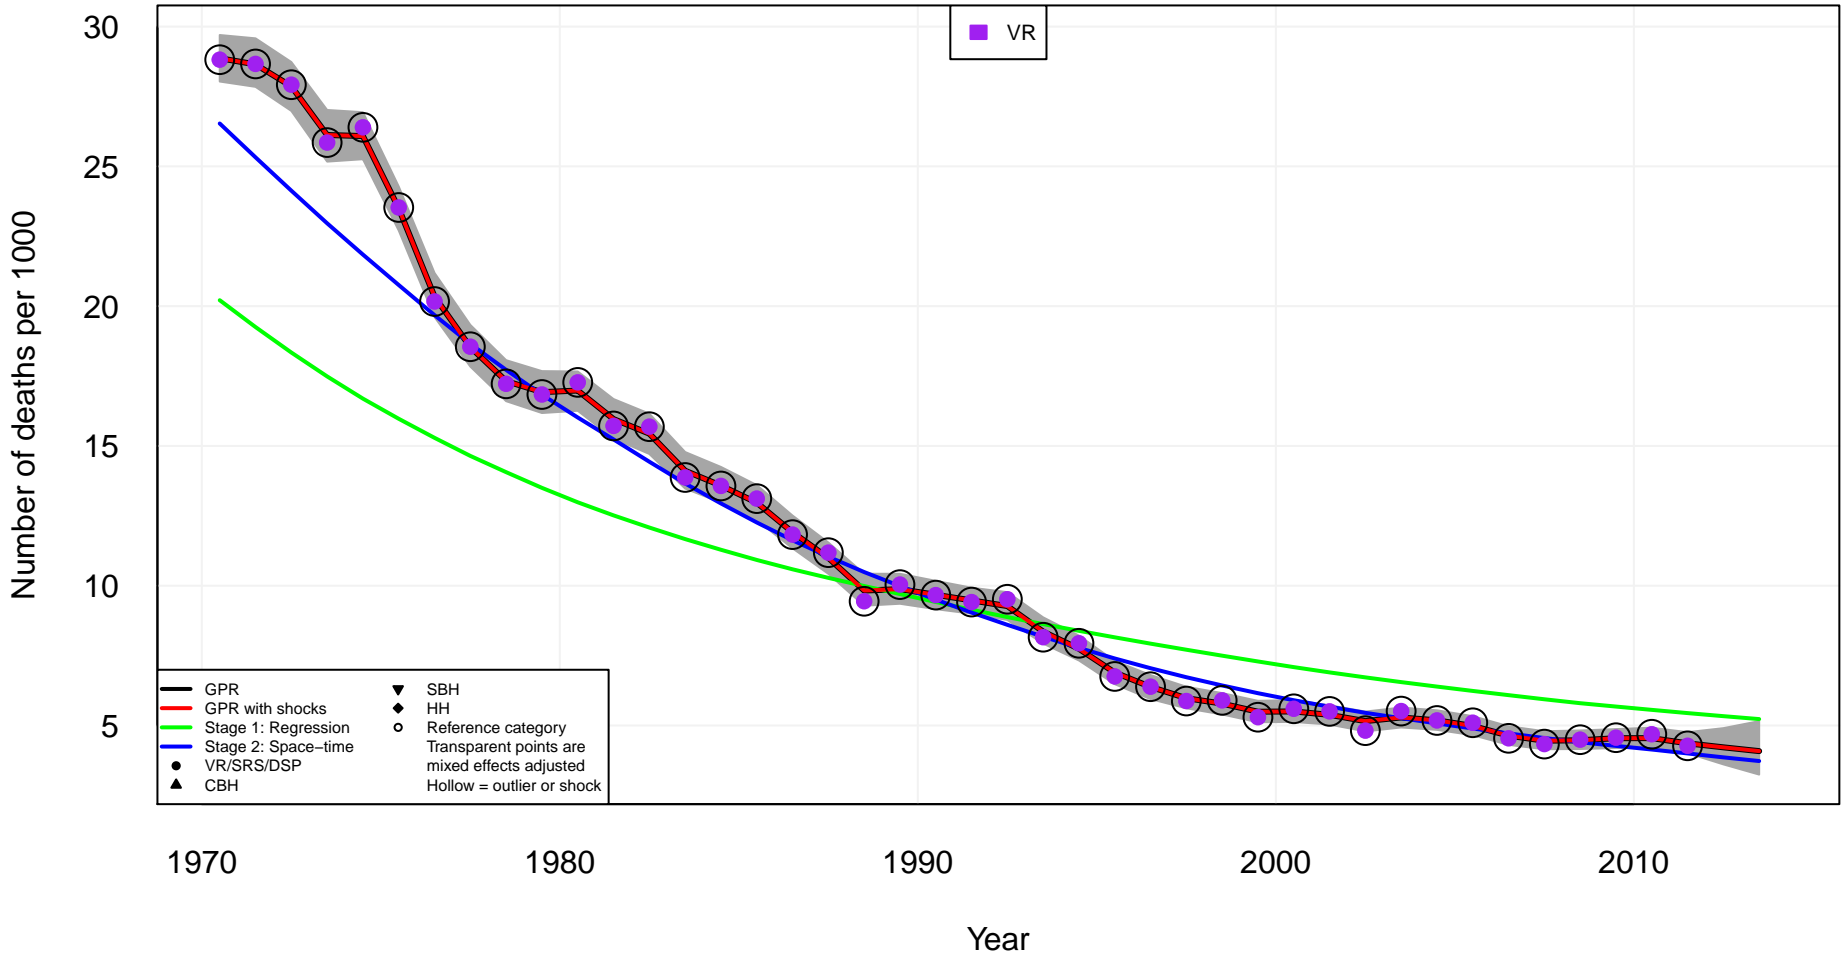

Europe, Western  
Belgium (BEL)

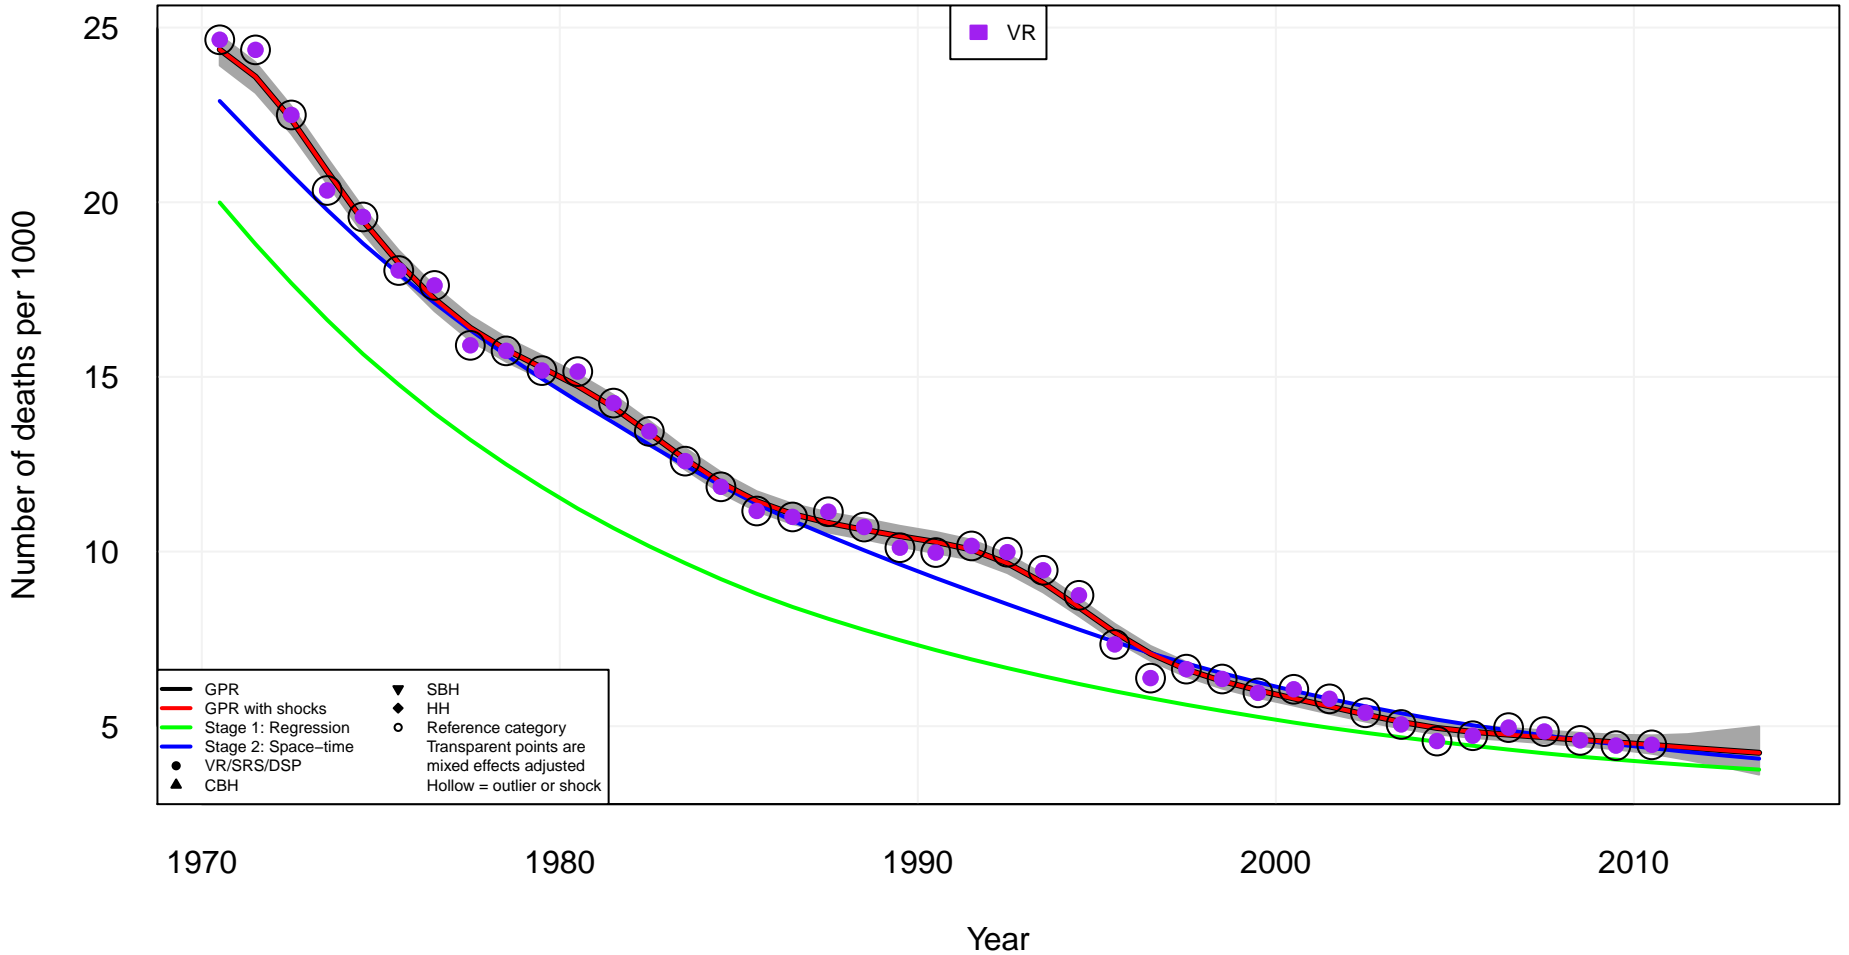

# Europe, Western Switzerland (CHE)

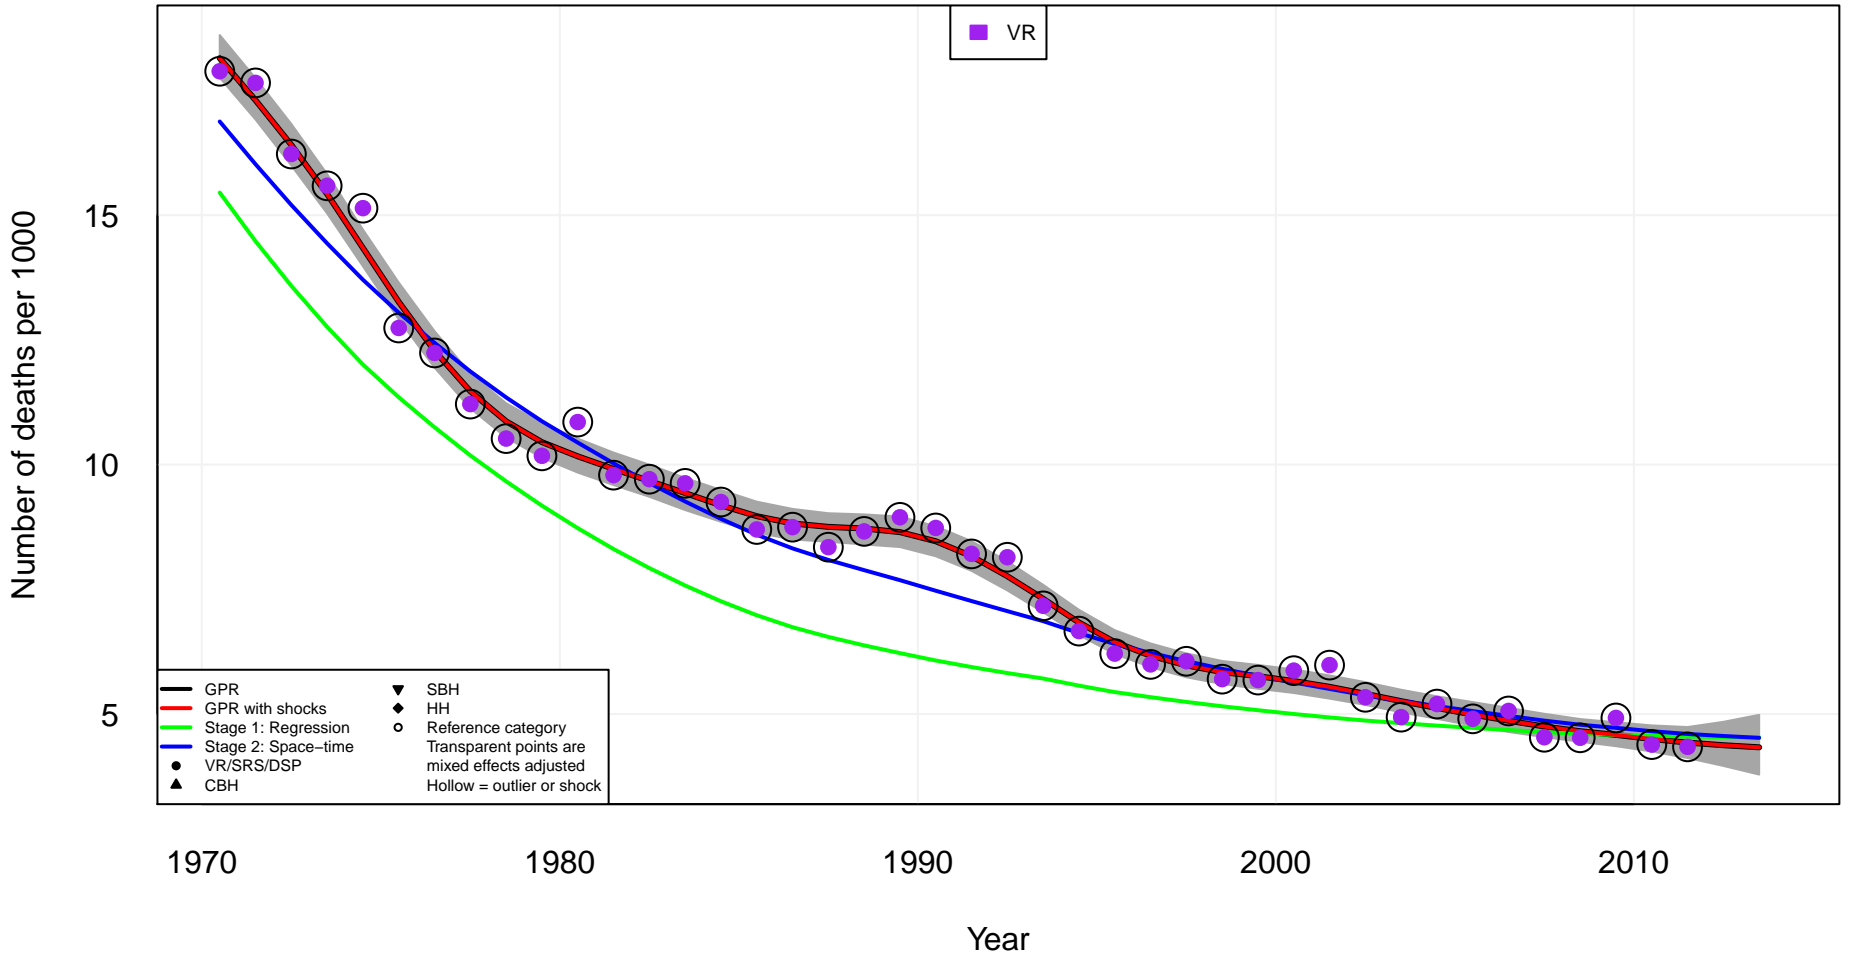

# Europe, Western Cyprus (CYP)

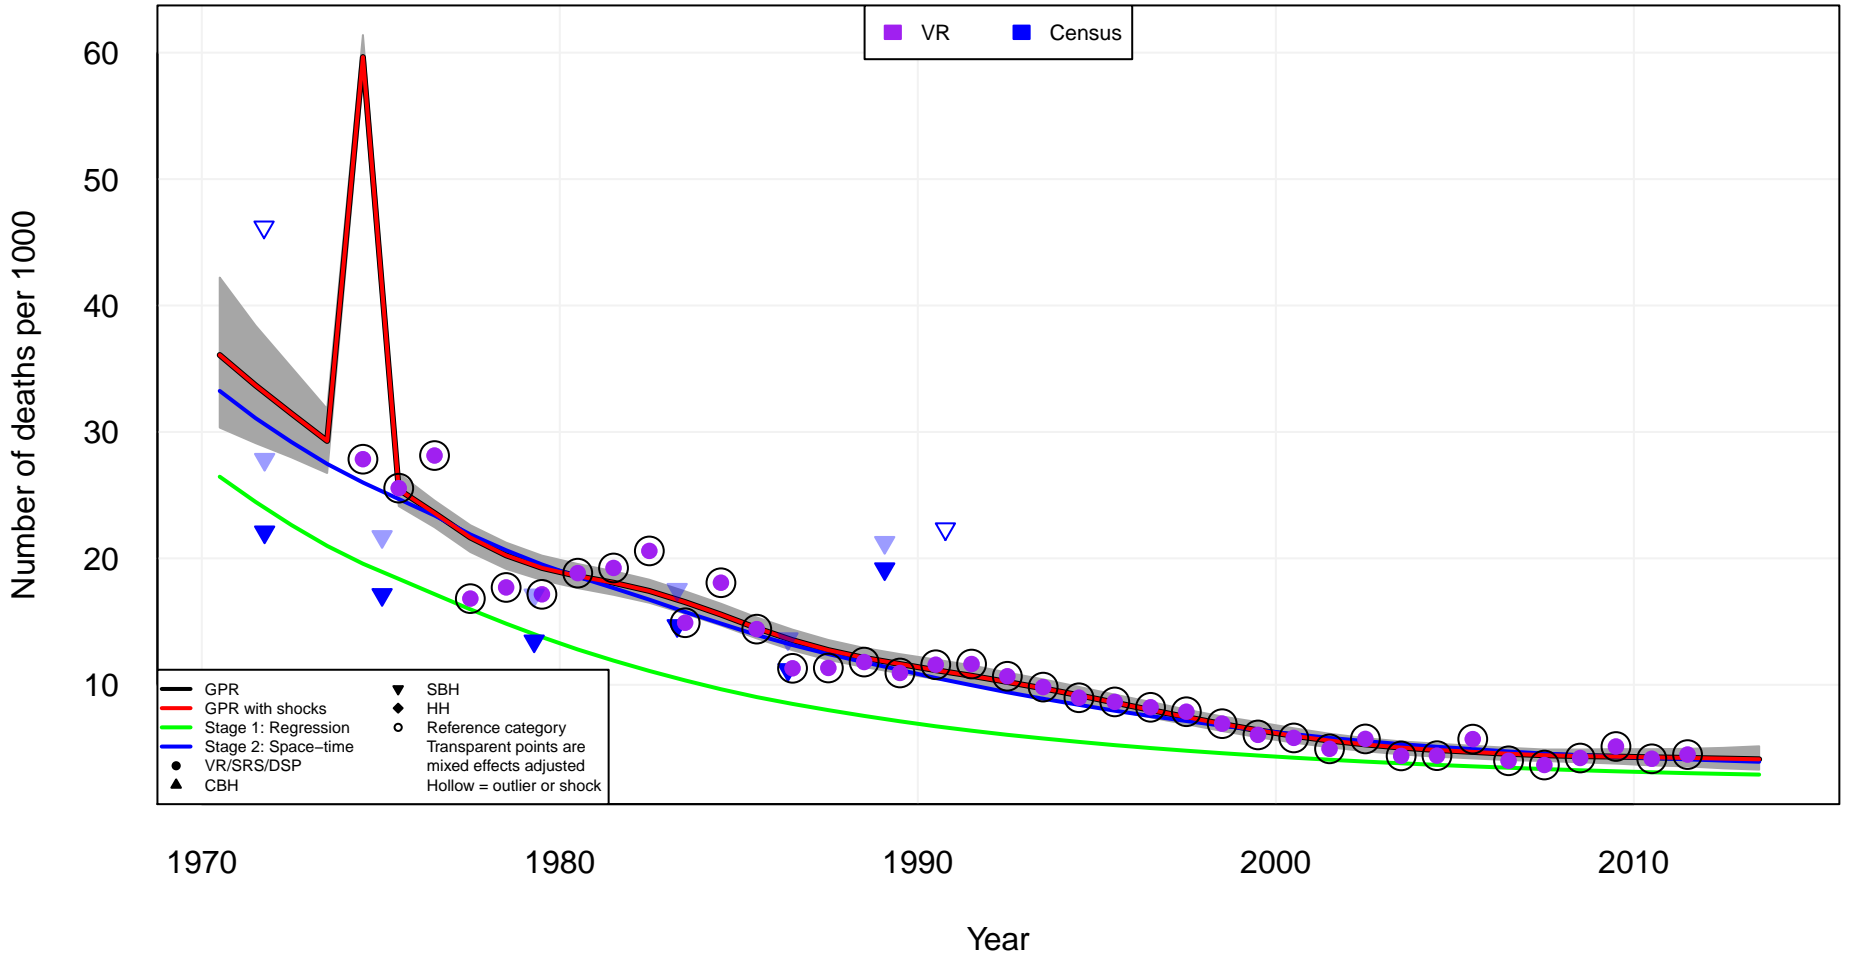



Europe, Western  
Germany (DEU)

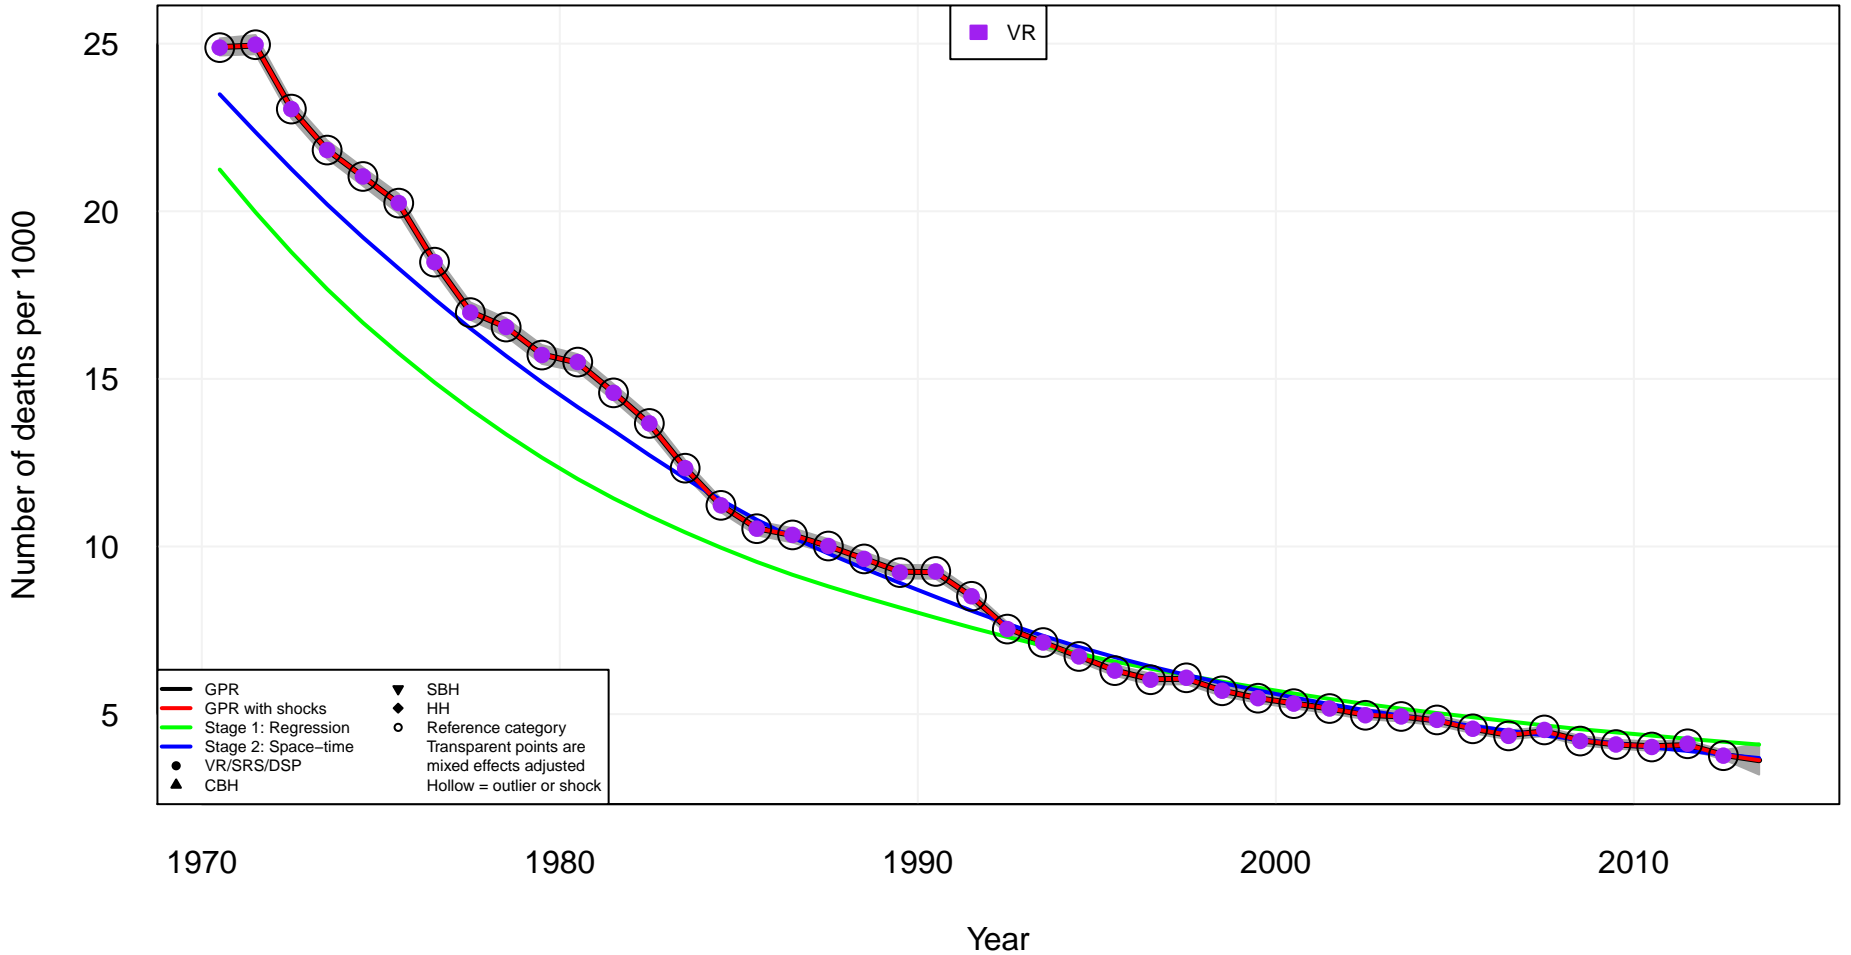

Europe, Western  
Denmark (DNK)

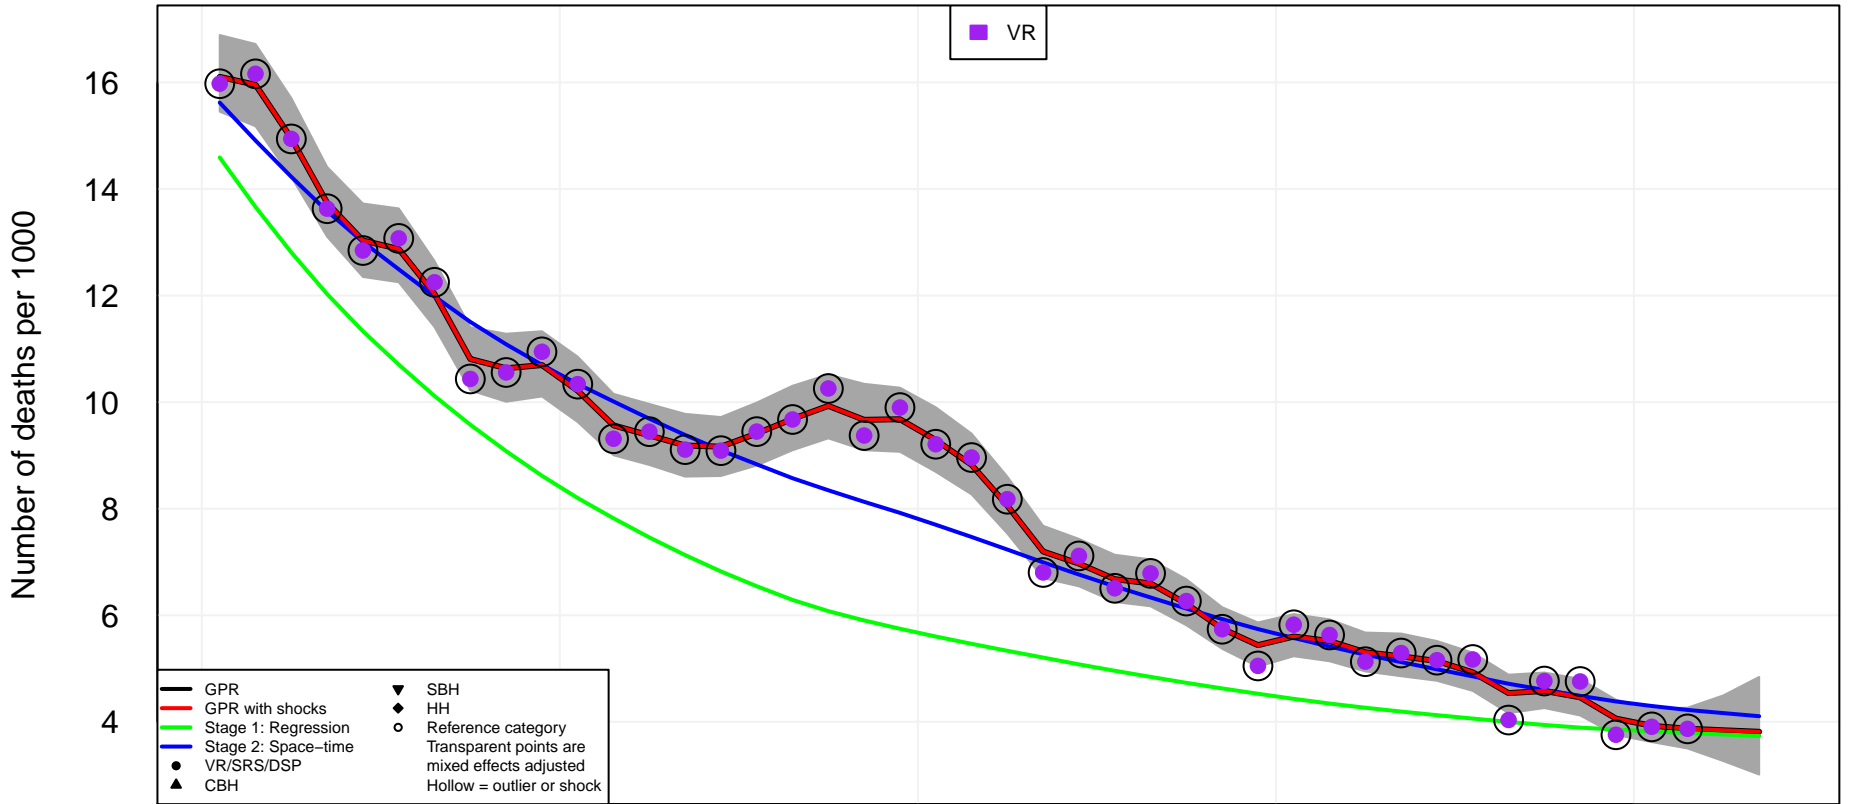

# Europe, Western Spain (ESP)

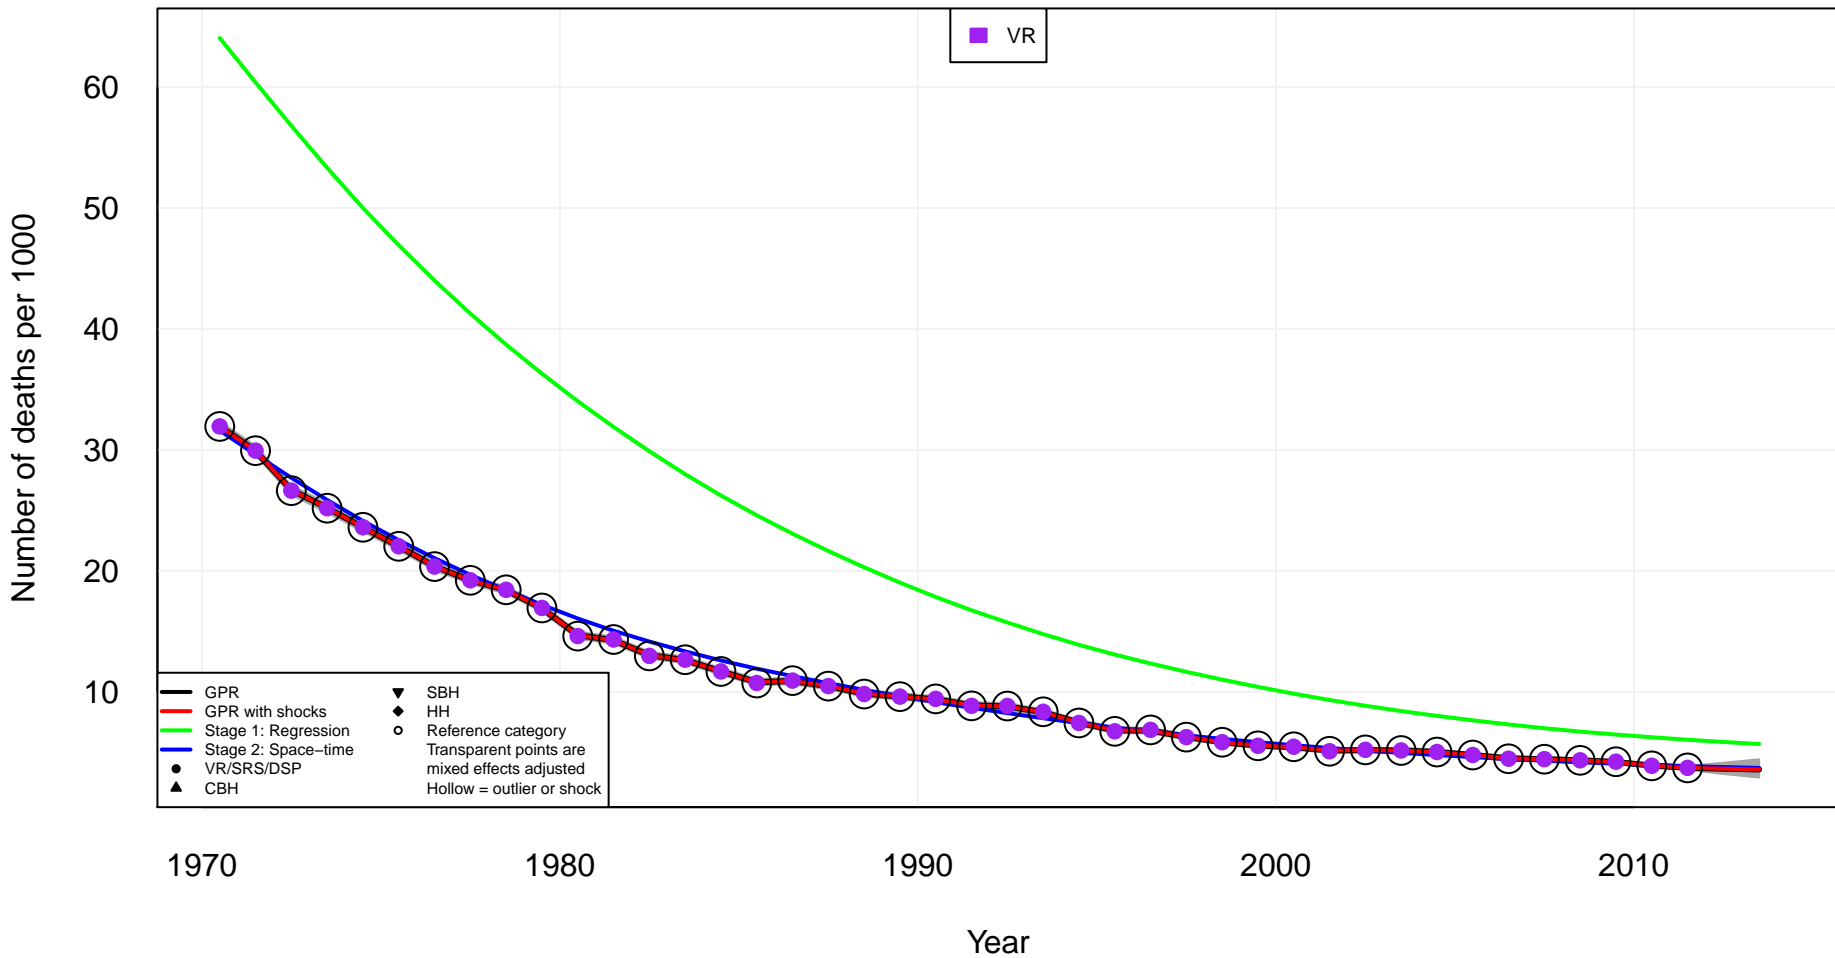

# Europe, Western Finland (FIN)

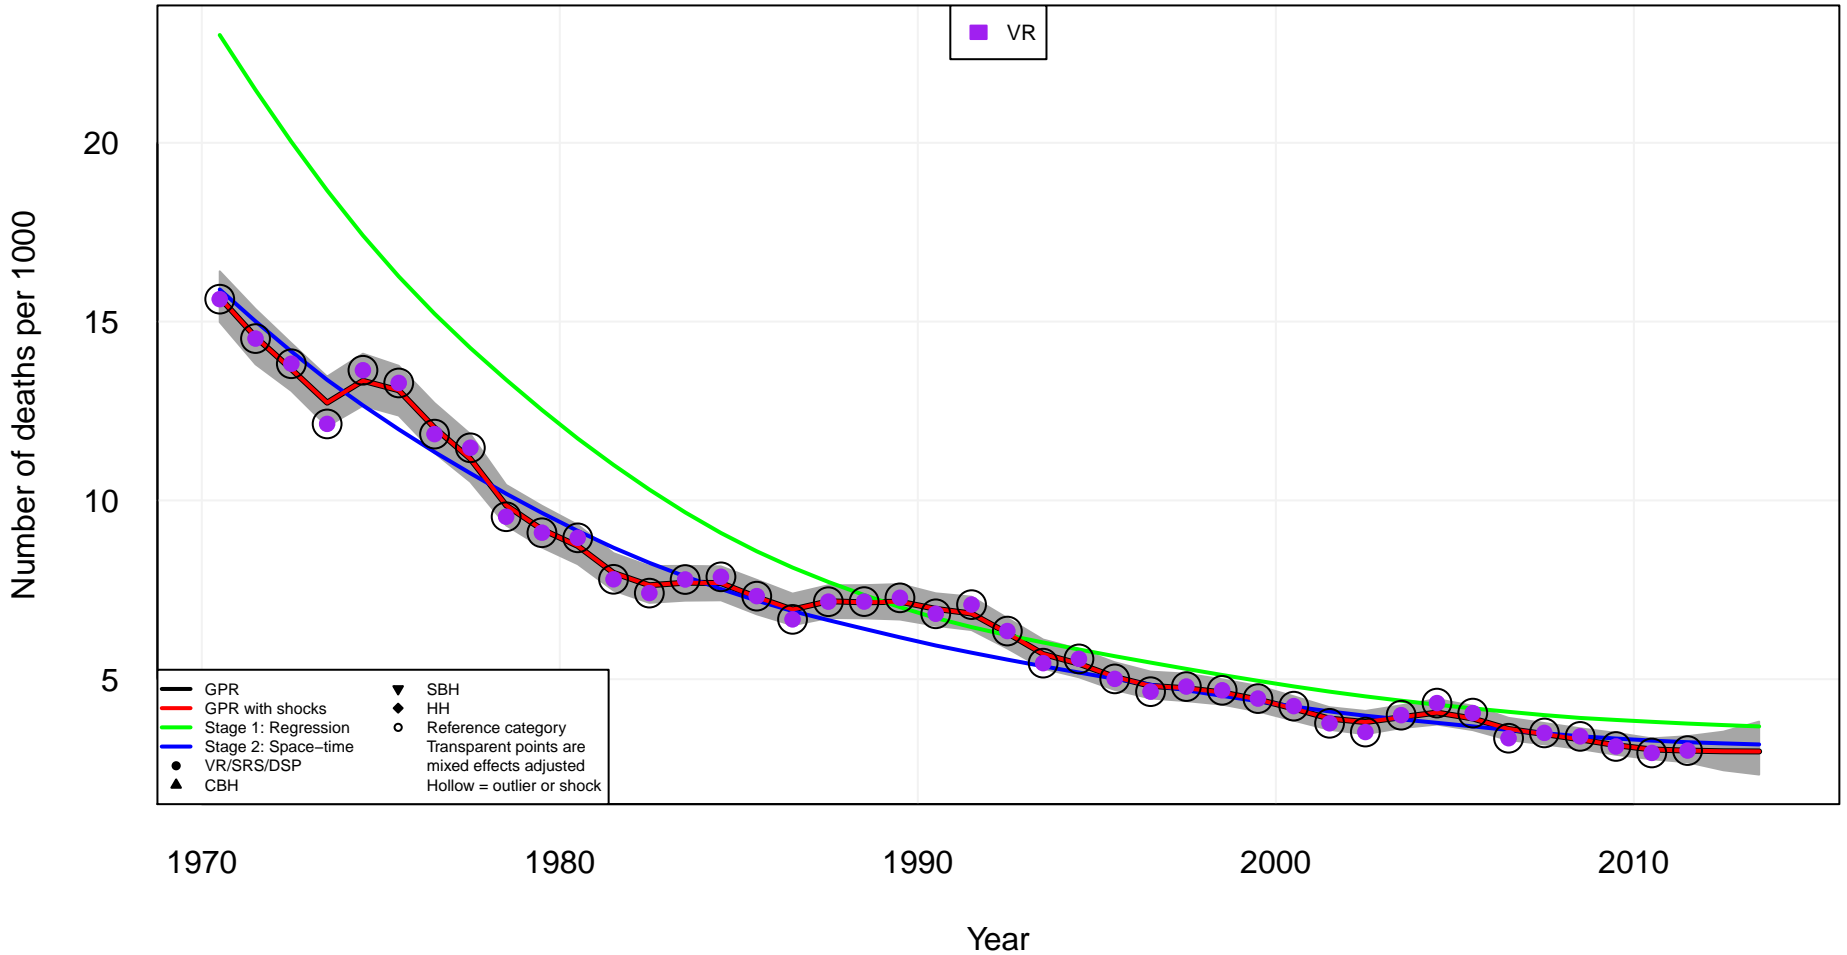

# Europe, Western France (FRA)

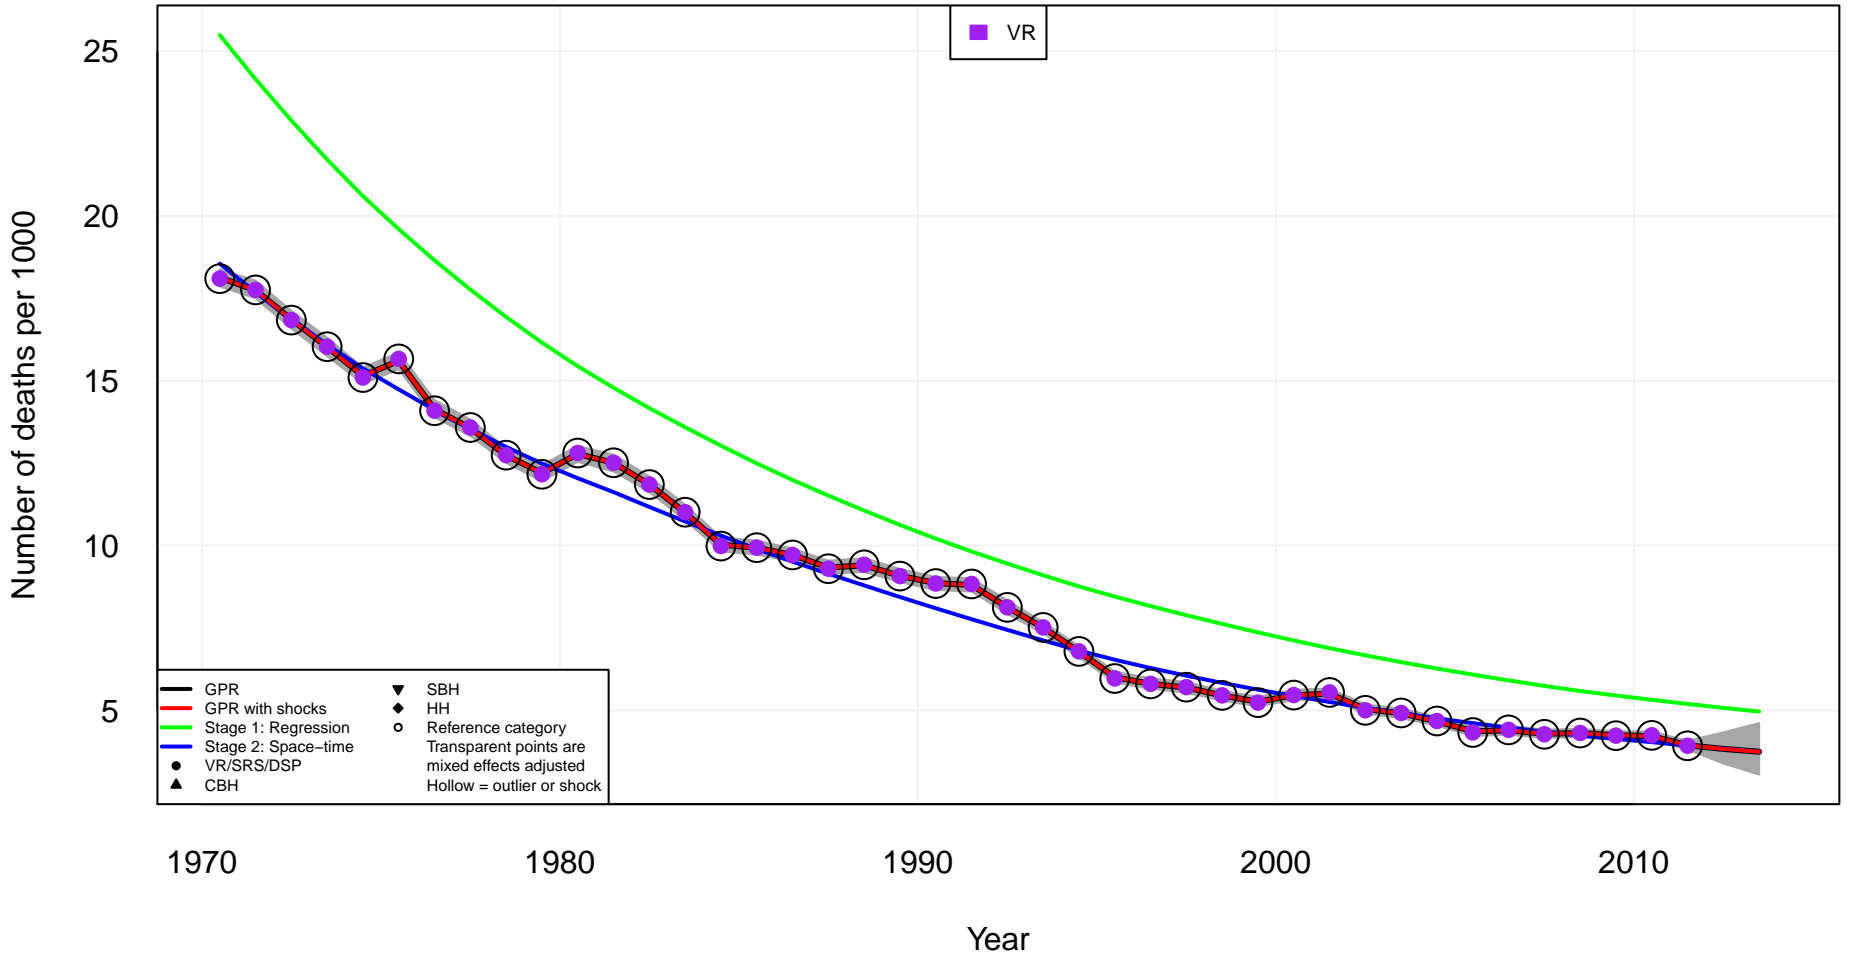

# Europe, Western United Kingdom (GBR)

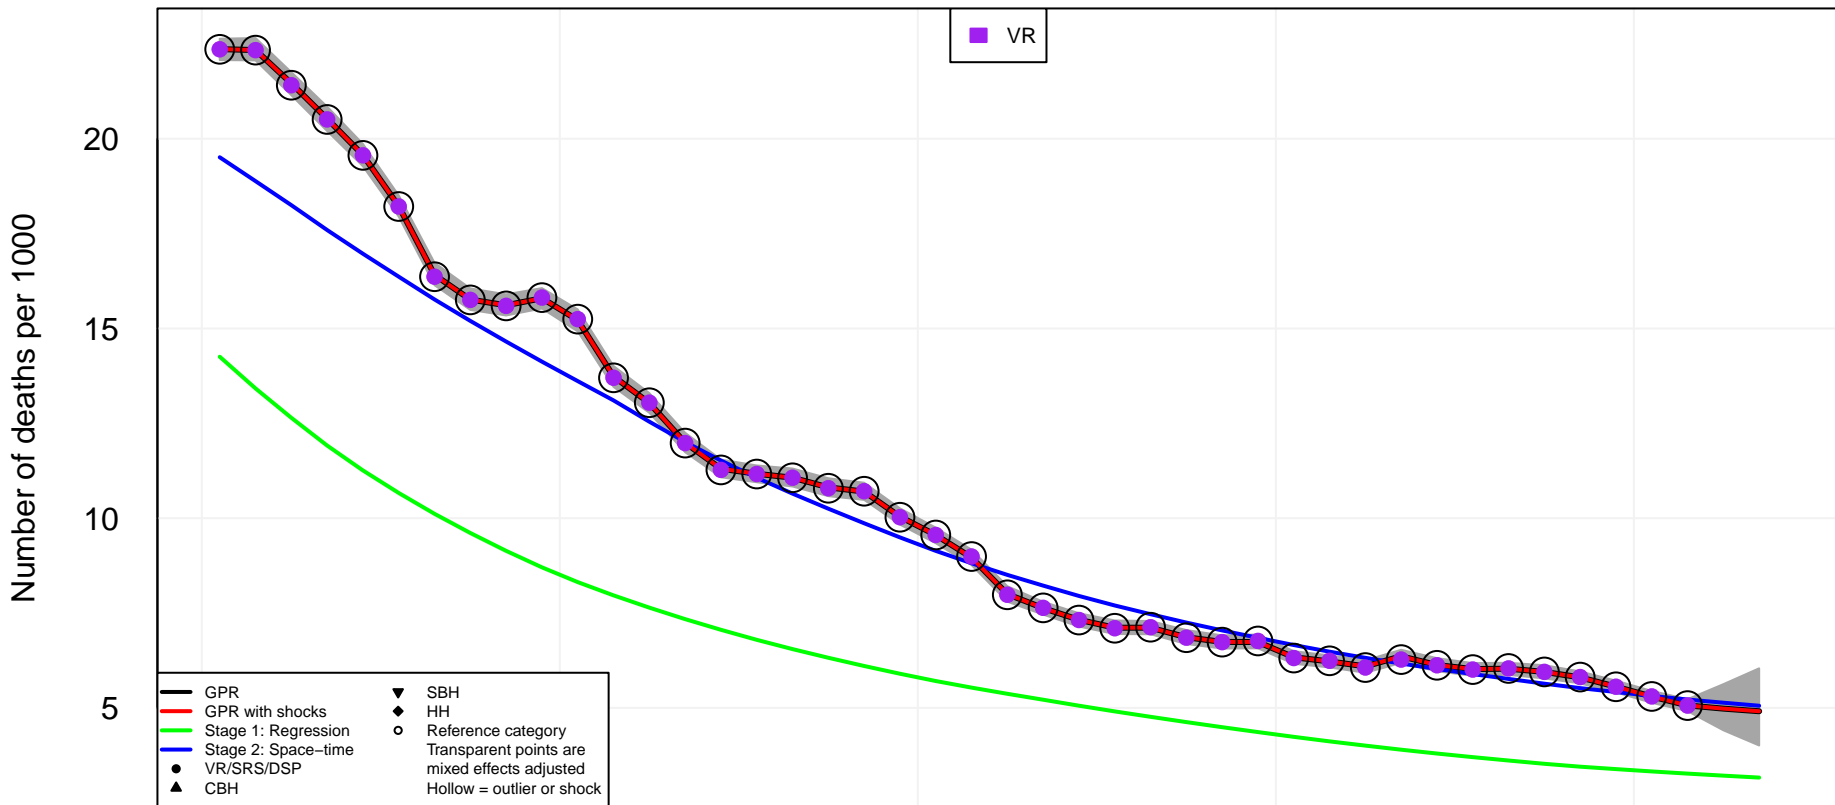

— GPR  
 — GPR with shocks  
 — Stage 1: Regression  
 — Stage 2: Space-time  
 ● VR/SRS/DSP  
 ▲ CBH  
 ▼ SBH  
 ◆ HH  
 ○ Reference category  
 Transparent points are mixed effects adjusted  
 Hollow = outlier or shock

■ VR

1970 1980 1990 2000 2010

Year

Number of deaths per 1000

# Europe, Western Greece (GRC)

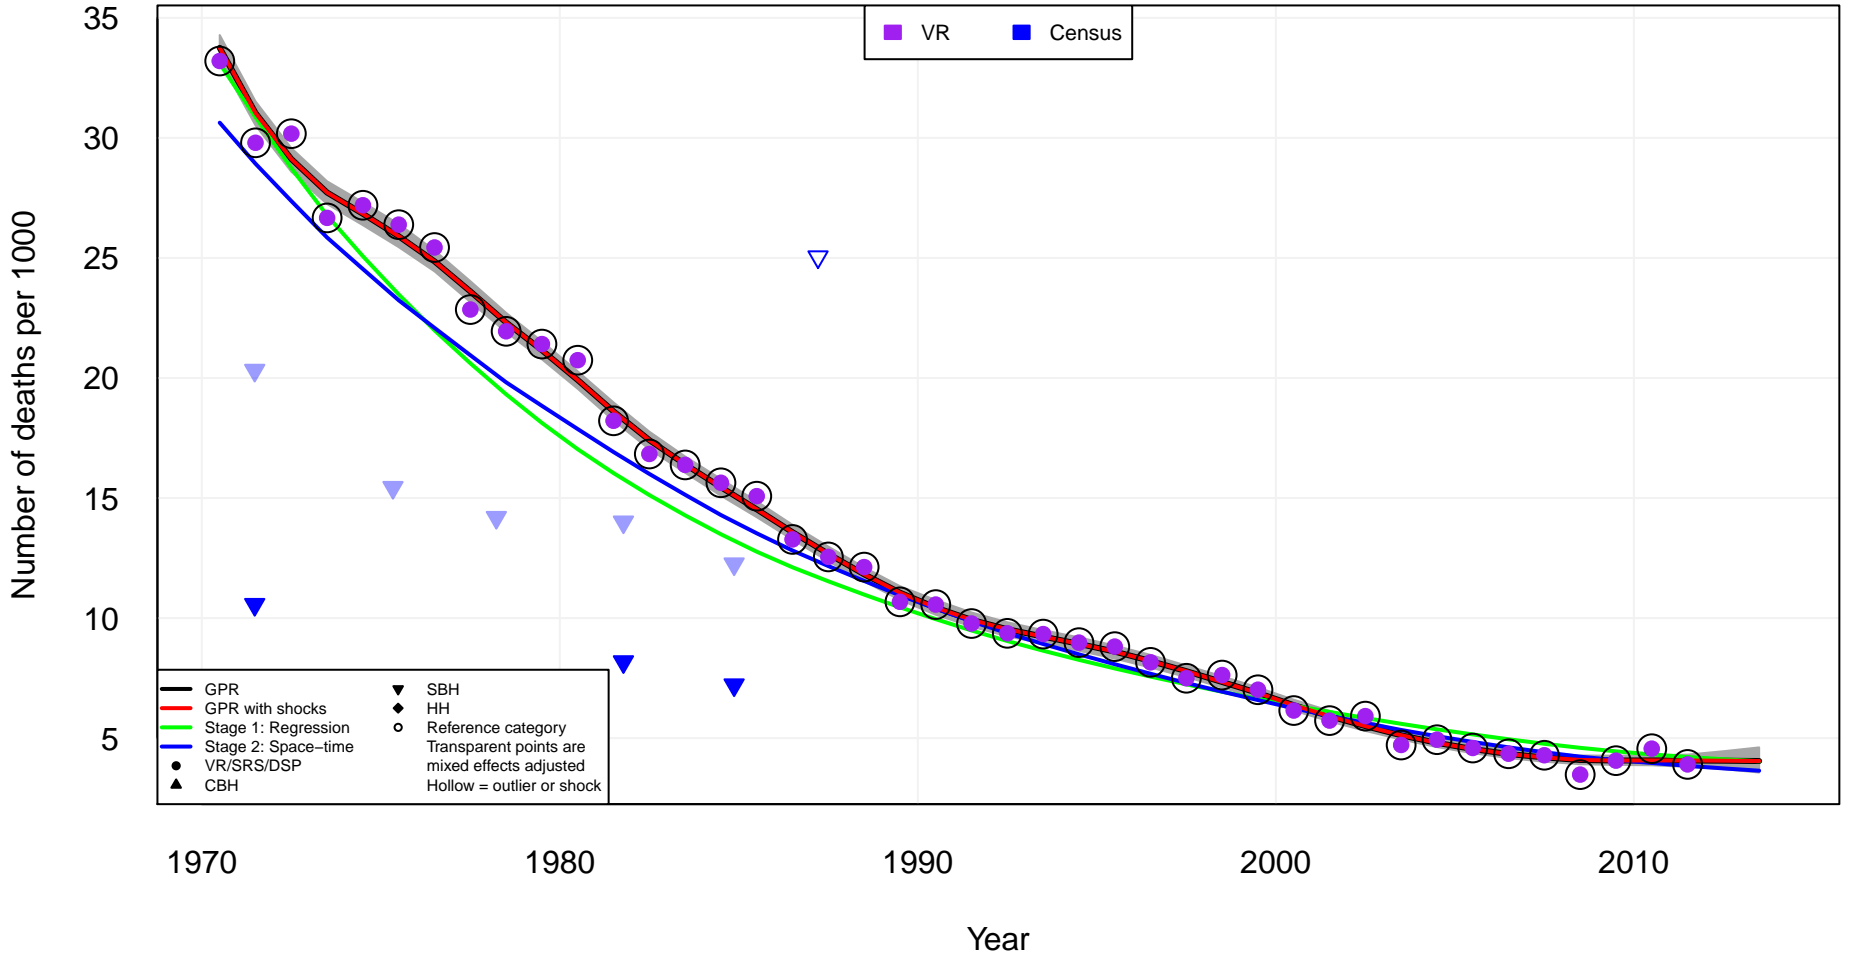

# Europe, Western Ireland (IRL)

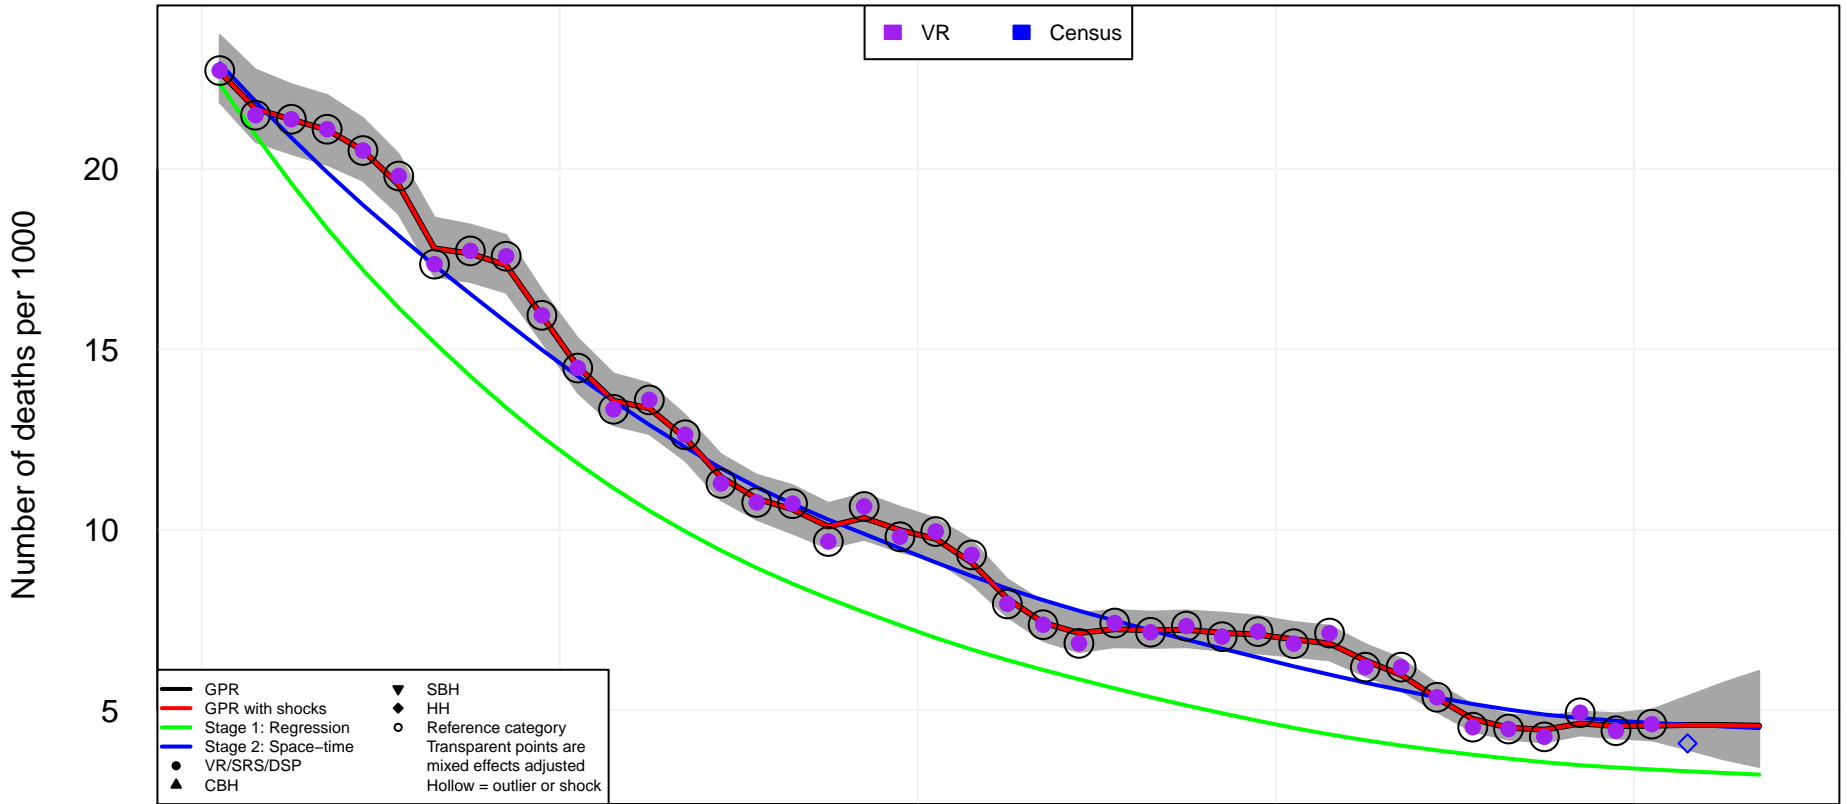

— GPR  
 — GPR with shocks  
 — Stage 1: Regression  
 — Stage 2: Space-time  
 ● VR/SRS/DSP  
 ▲ CBH  
 ▼ SBH  
 ◆ HH  
 ○ Reference category  
 Transparent points are mixed effects adjusted  
 Hollow = outlier or shock

■ VR  
 ■ Census

1970 1980 1990 2000 2010

Year



# Europe, Western Iceland (ISL)

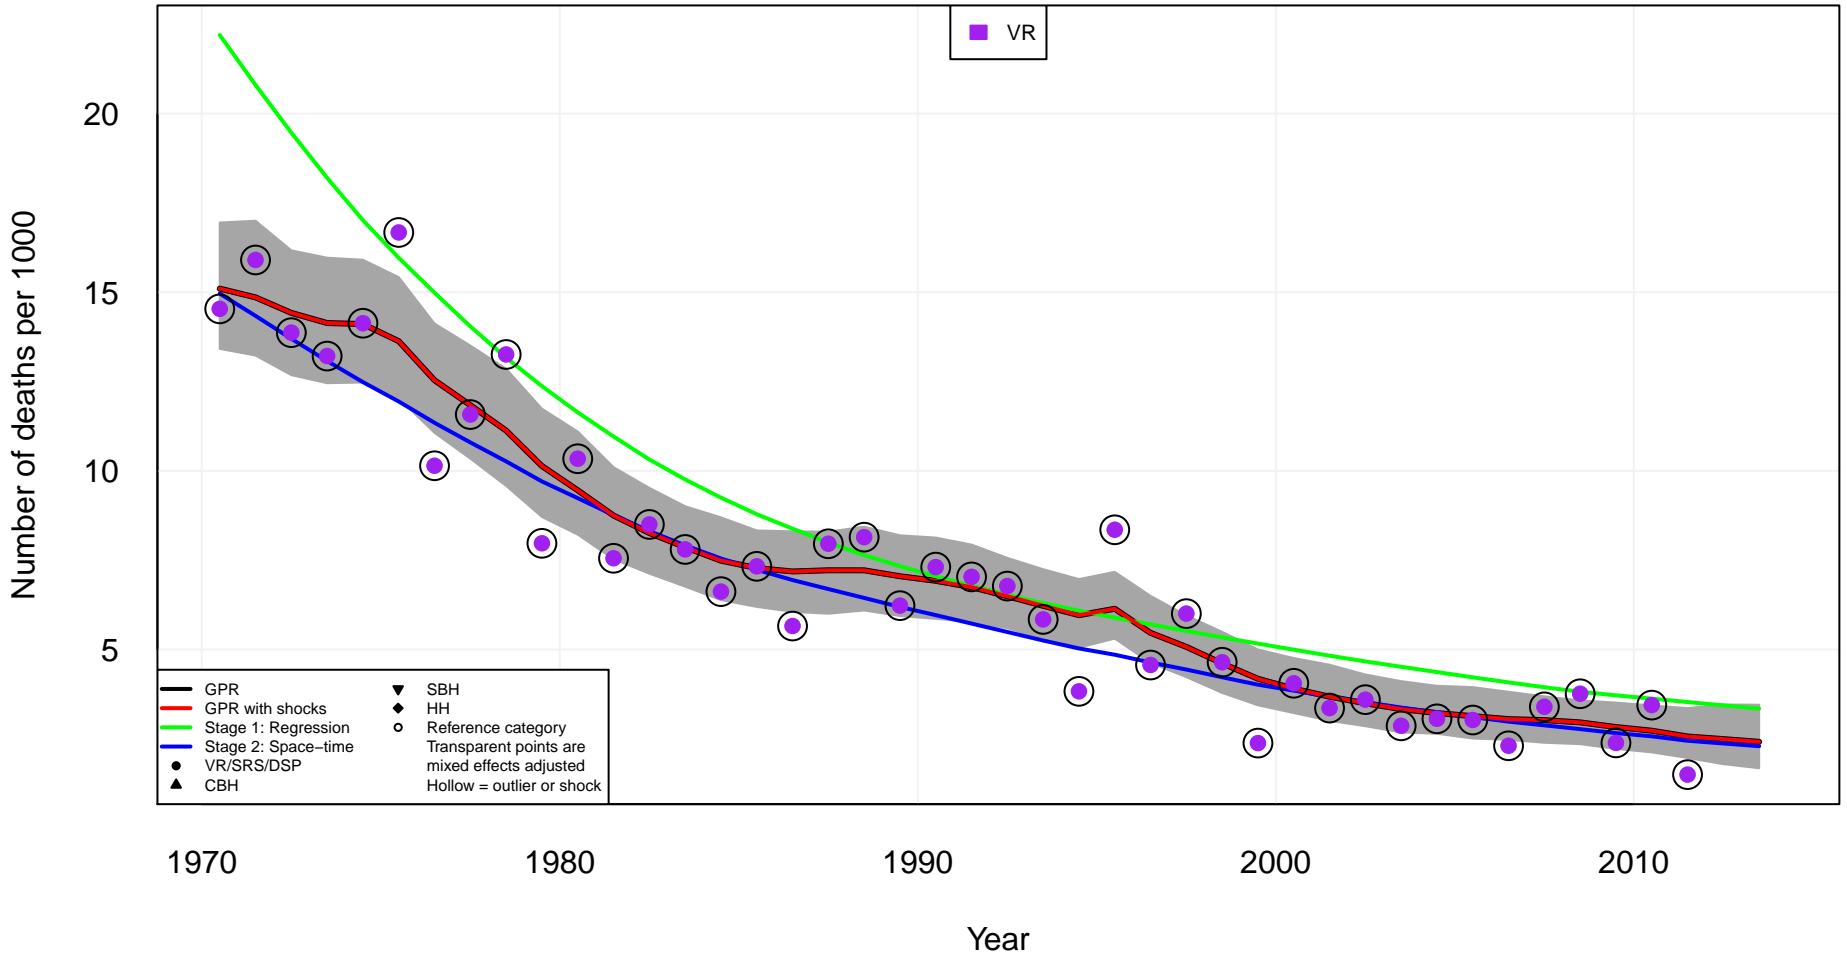

# Europe, Western Israel (ISR)

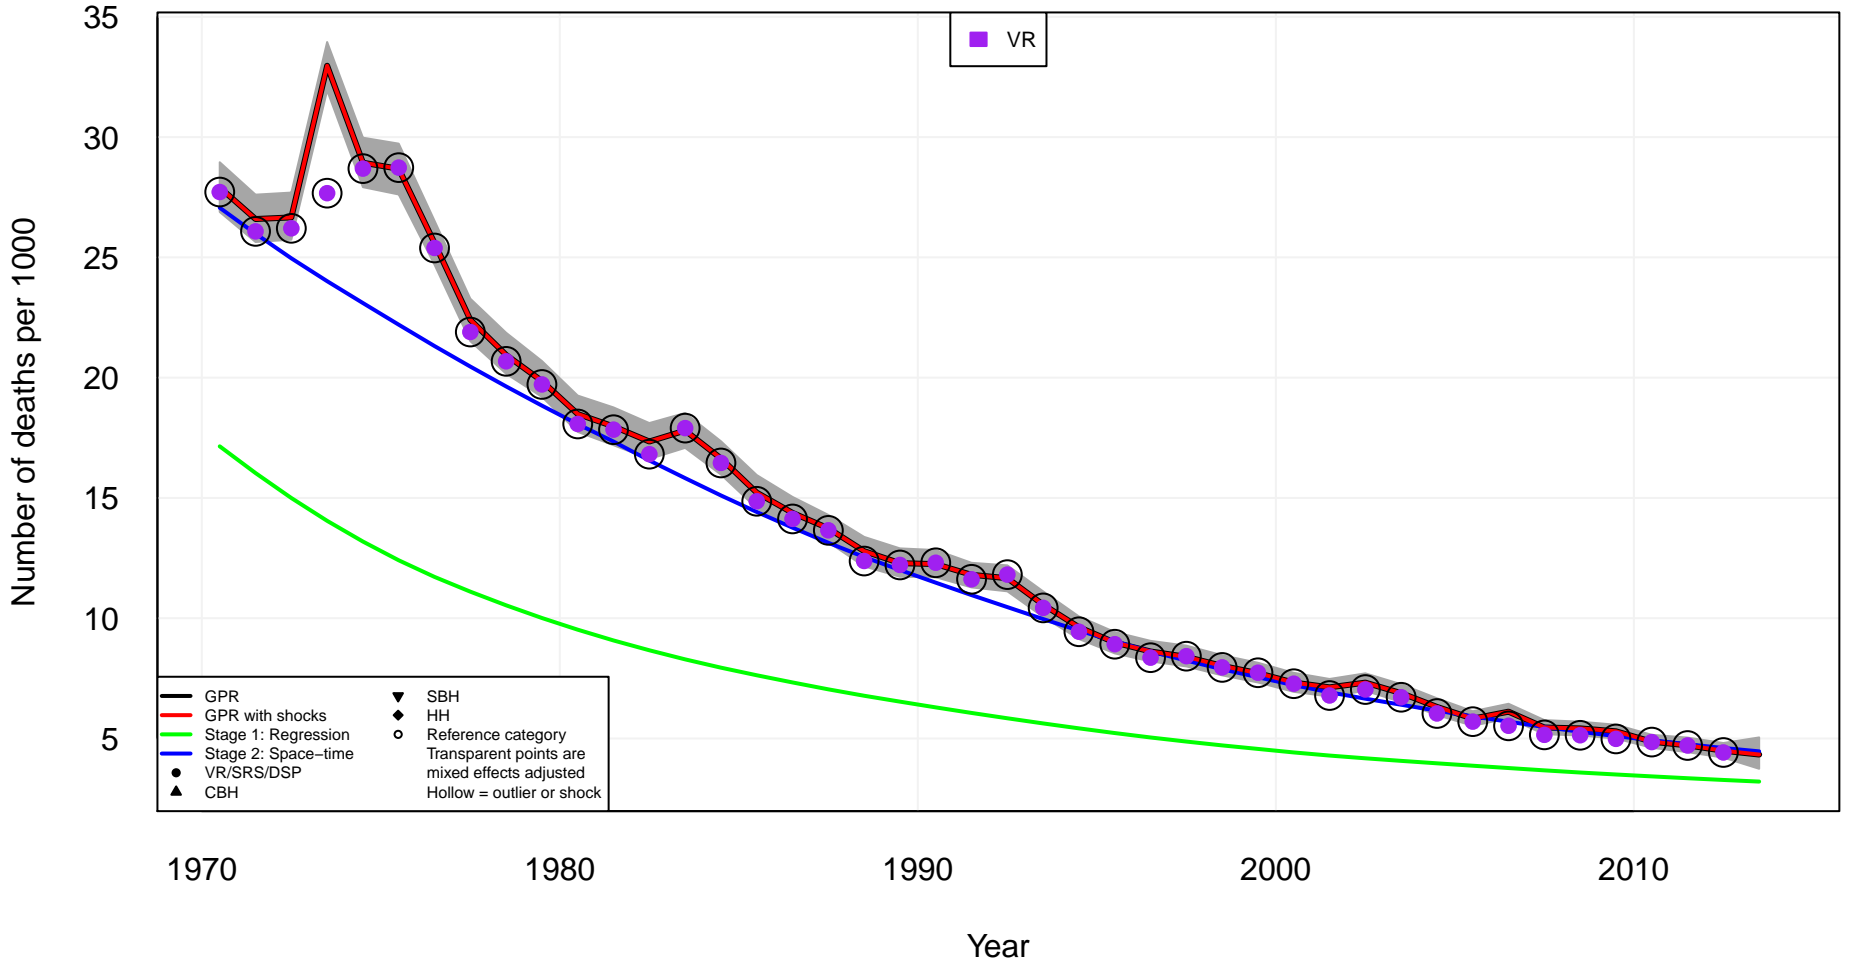

# Europe, Western Italy (ITA)

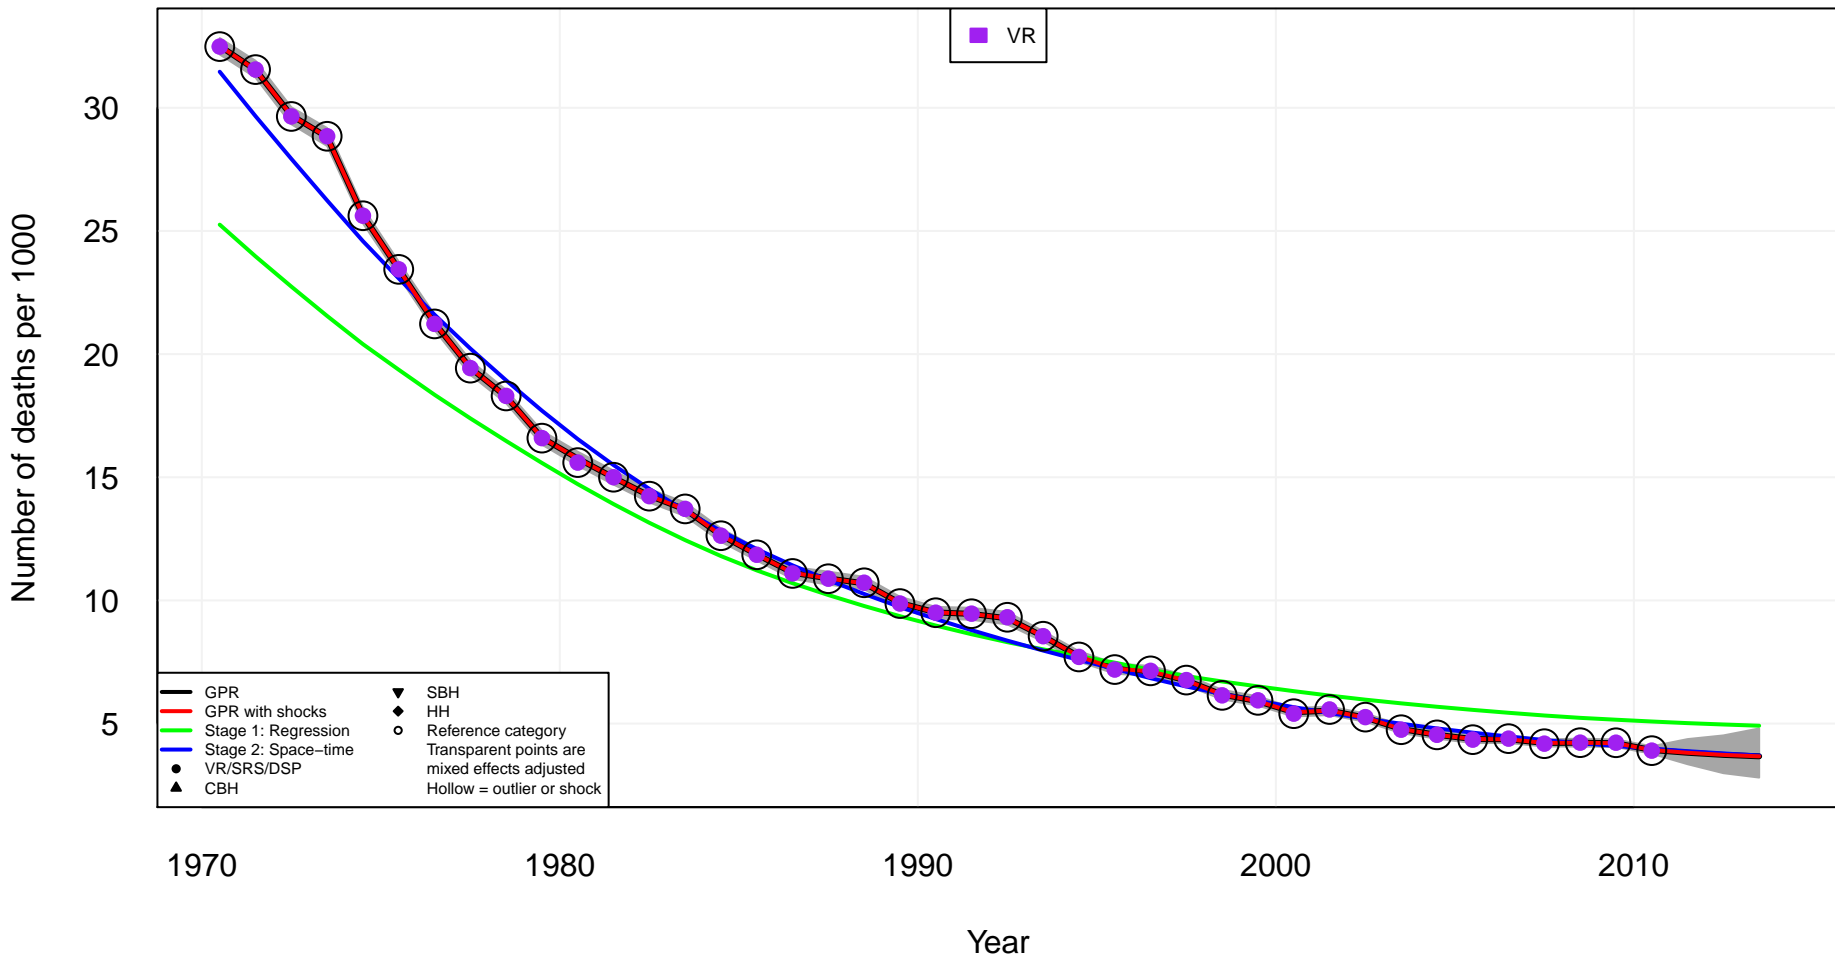

# Europe, Western Luxembourg (LUX)

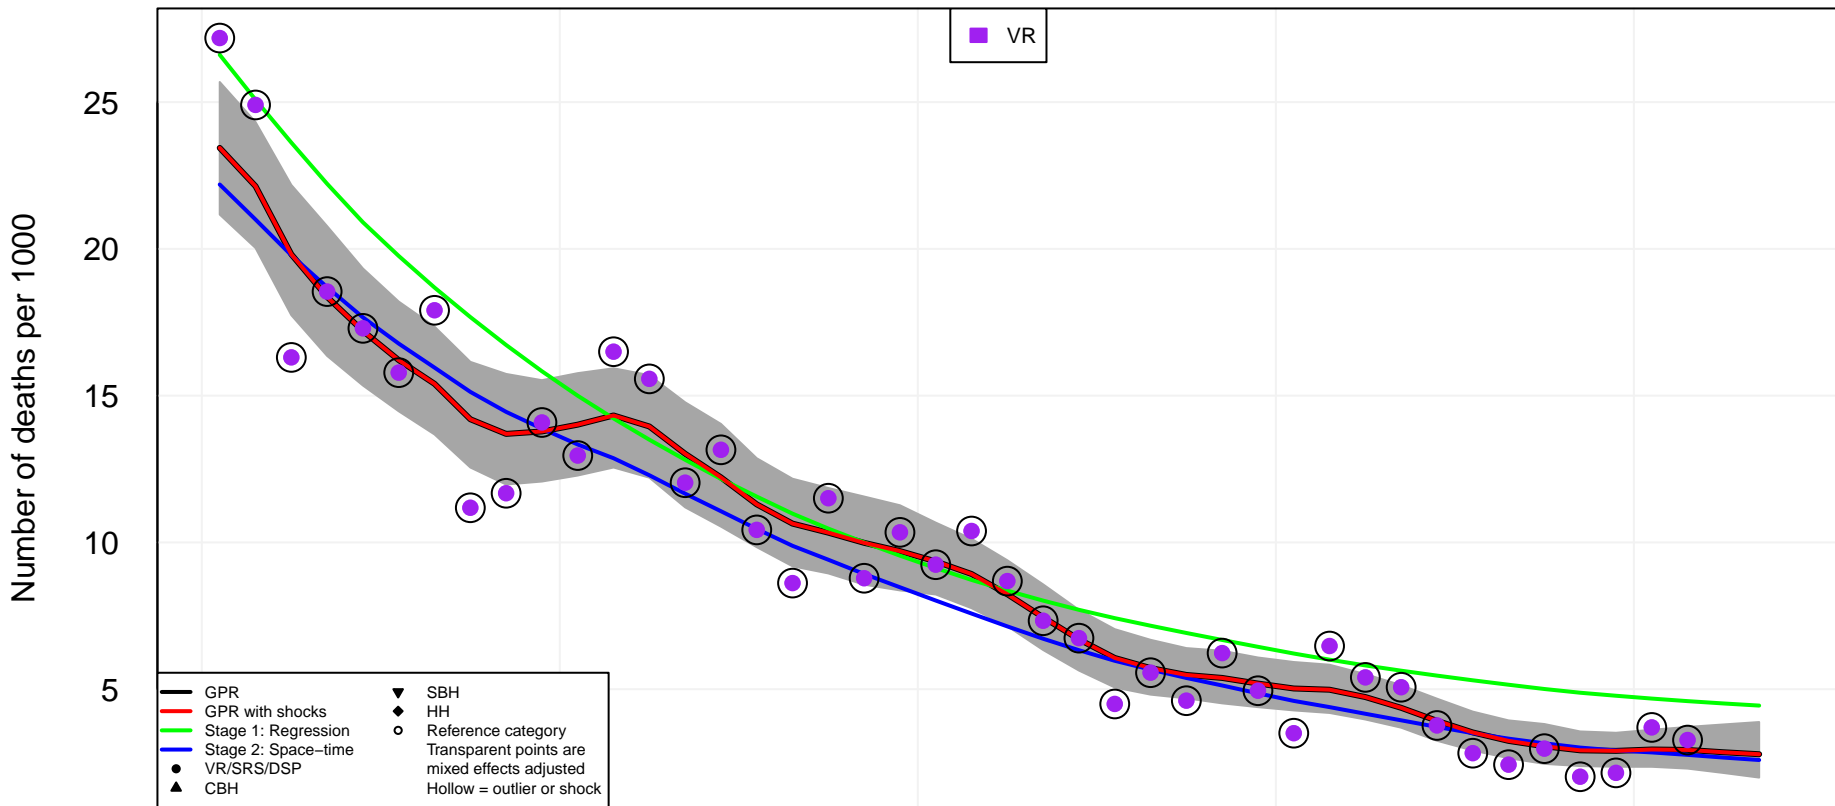

# Europe, Western Malta (MLT)

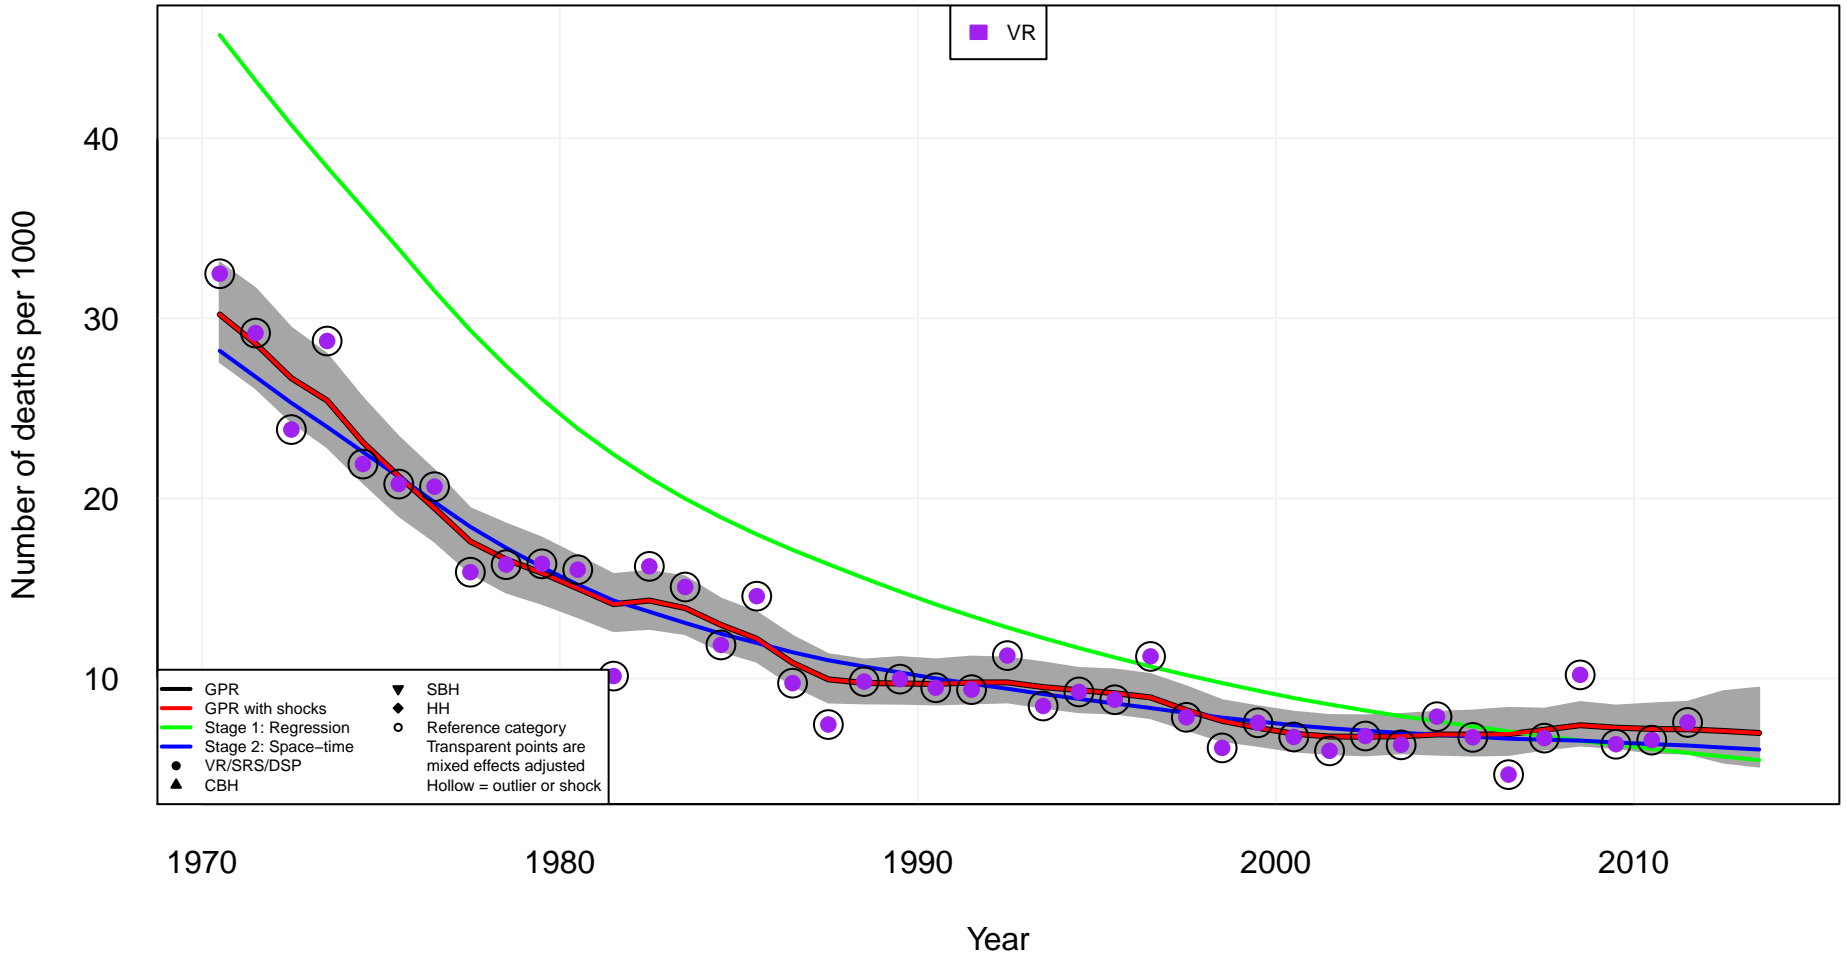

# Europe, Western Netherlands (NLD)

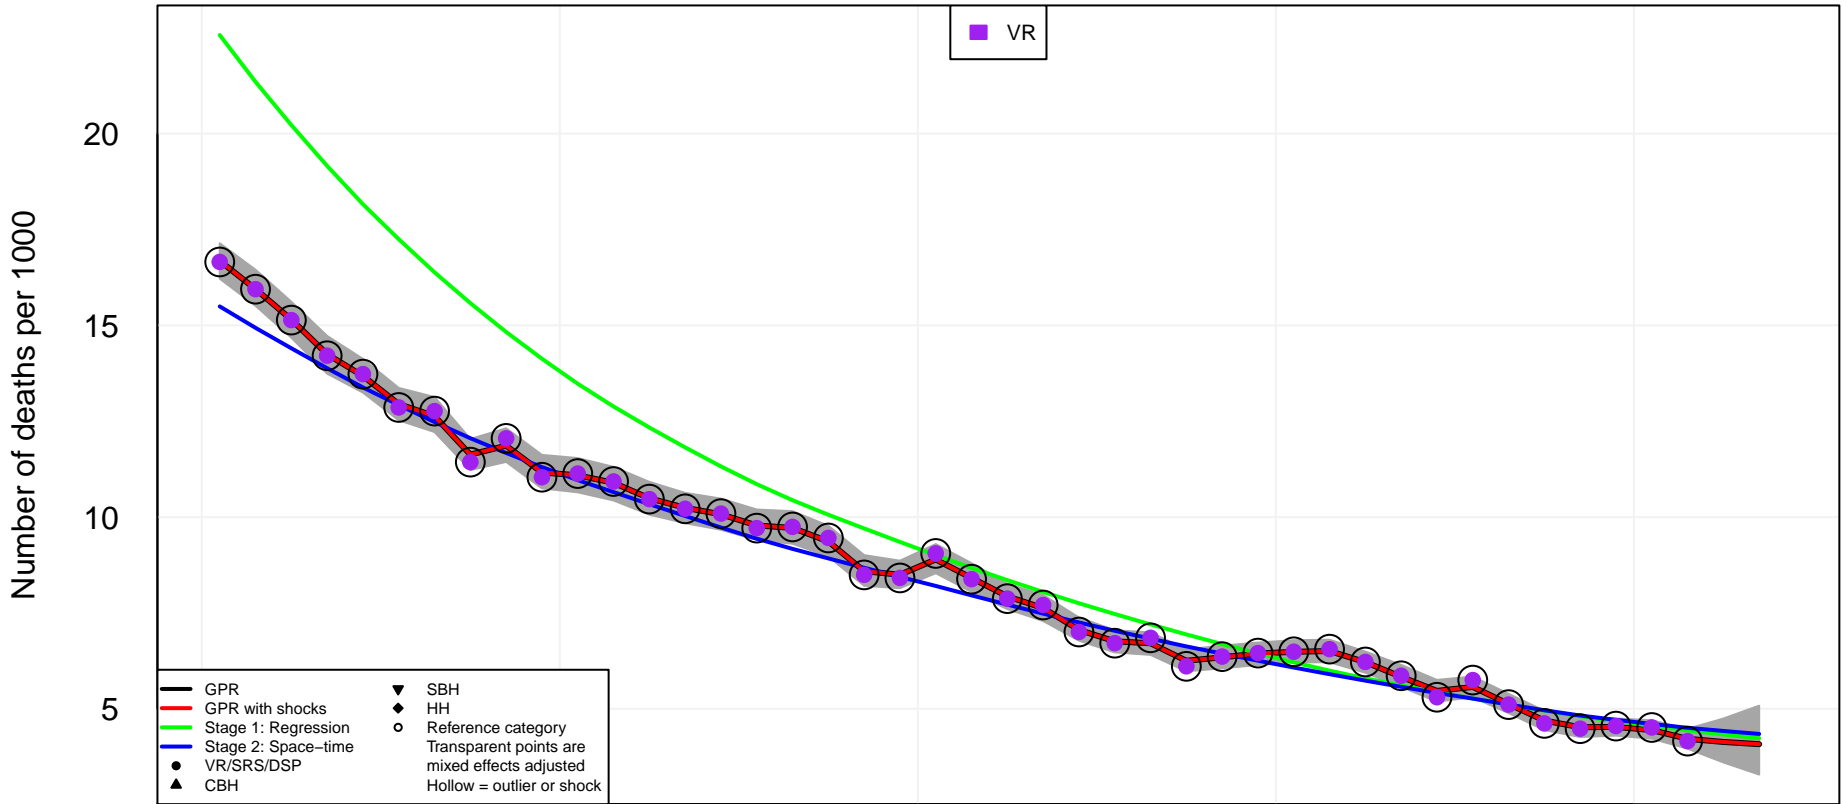

1970

1980

1990

2000

2010

Year

- GPR
- GPR with shocks
- Stage 1: Regression
- Stage 2: Space-time
- VR/SRS/DSP
- ▲ CBH
- ▼ SBH
- ◆ HH
- Reference category
- Transparent points are mixed effects adjusted
- Hollow = outlier or shock

VR

Europe, Western  
Norway (NOR)

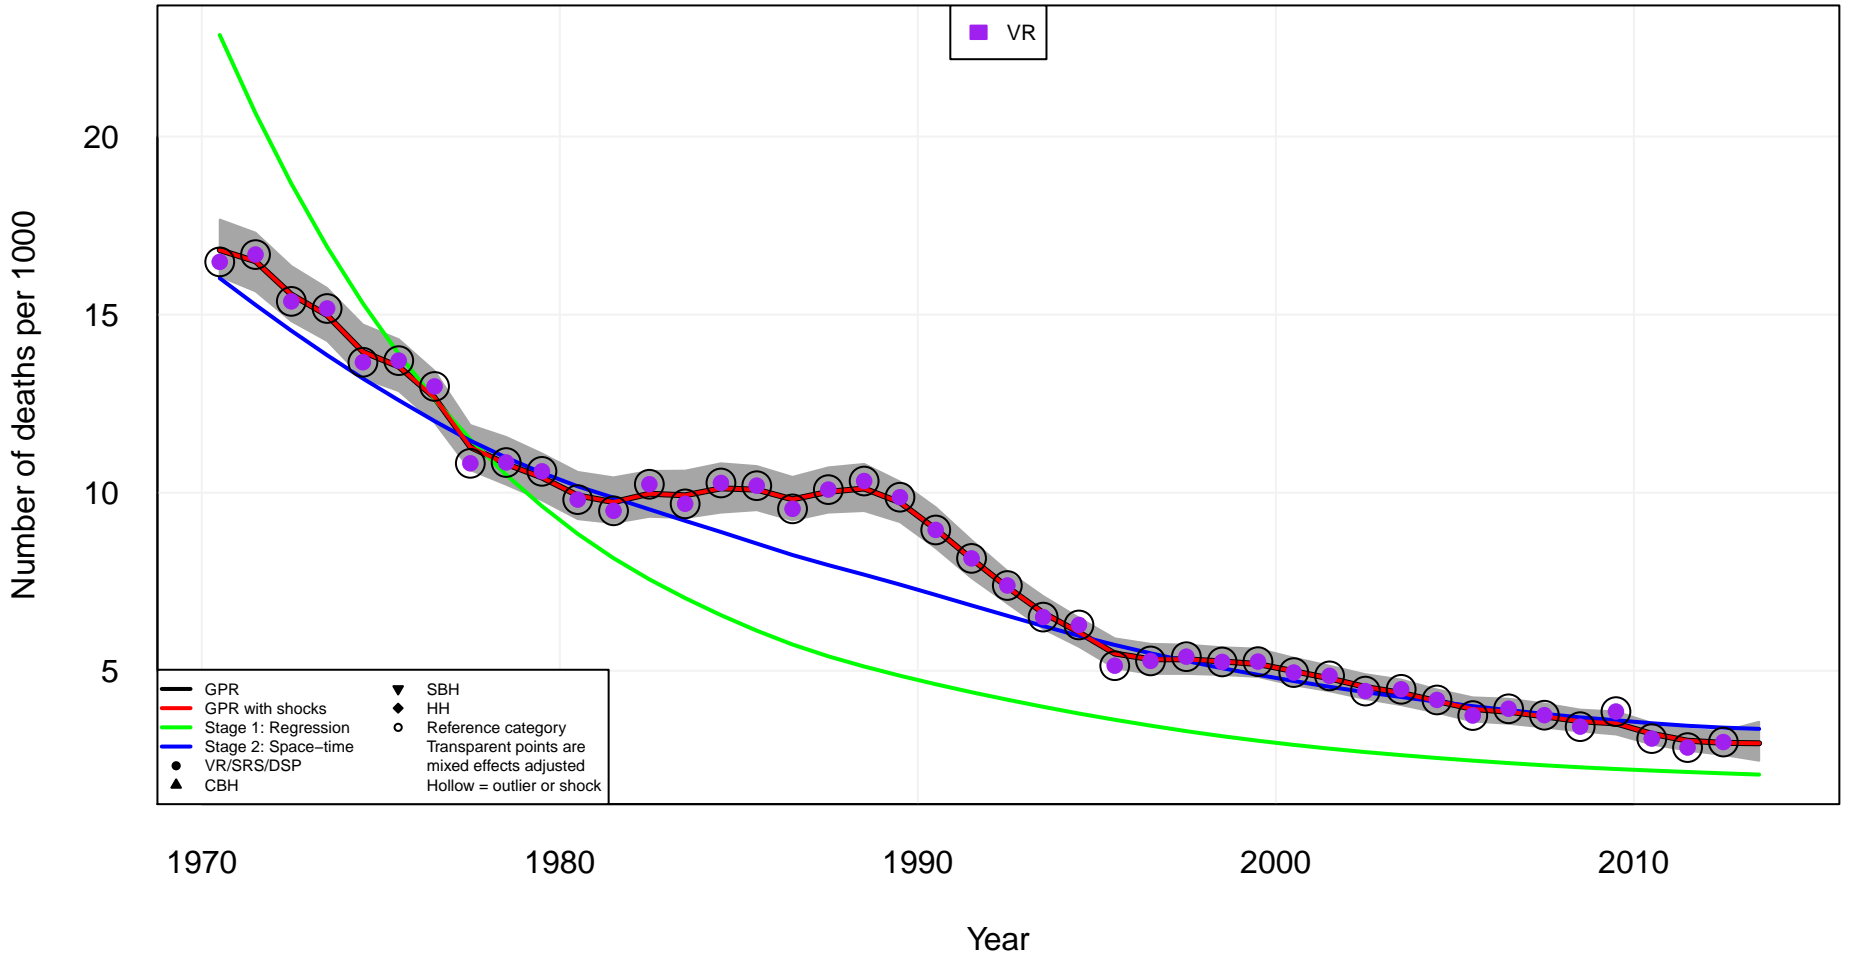

# Europe, Western Portugal (PRT)

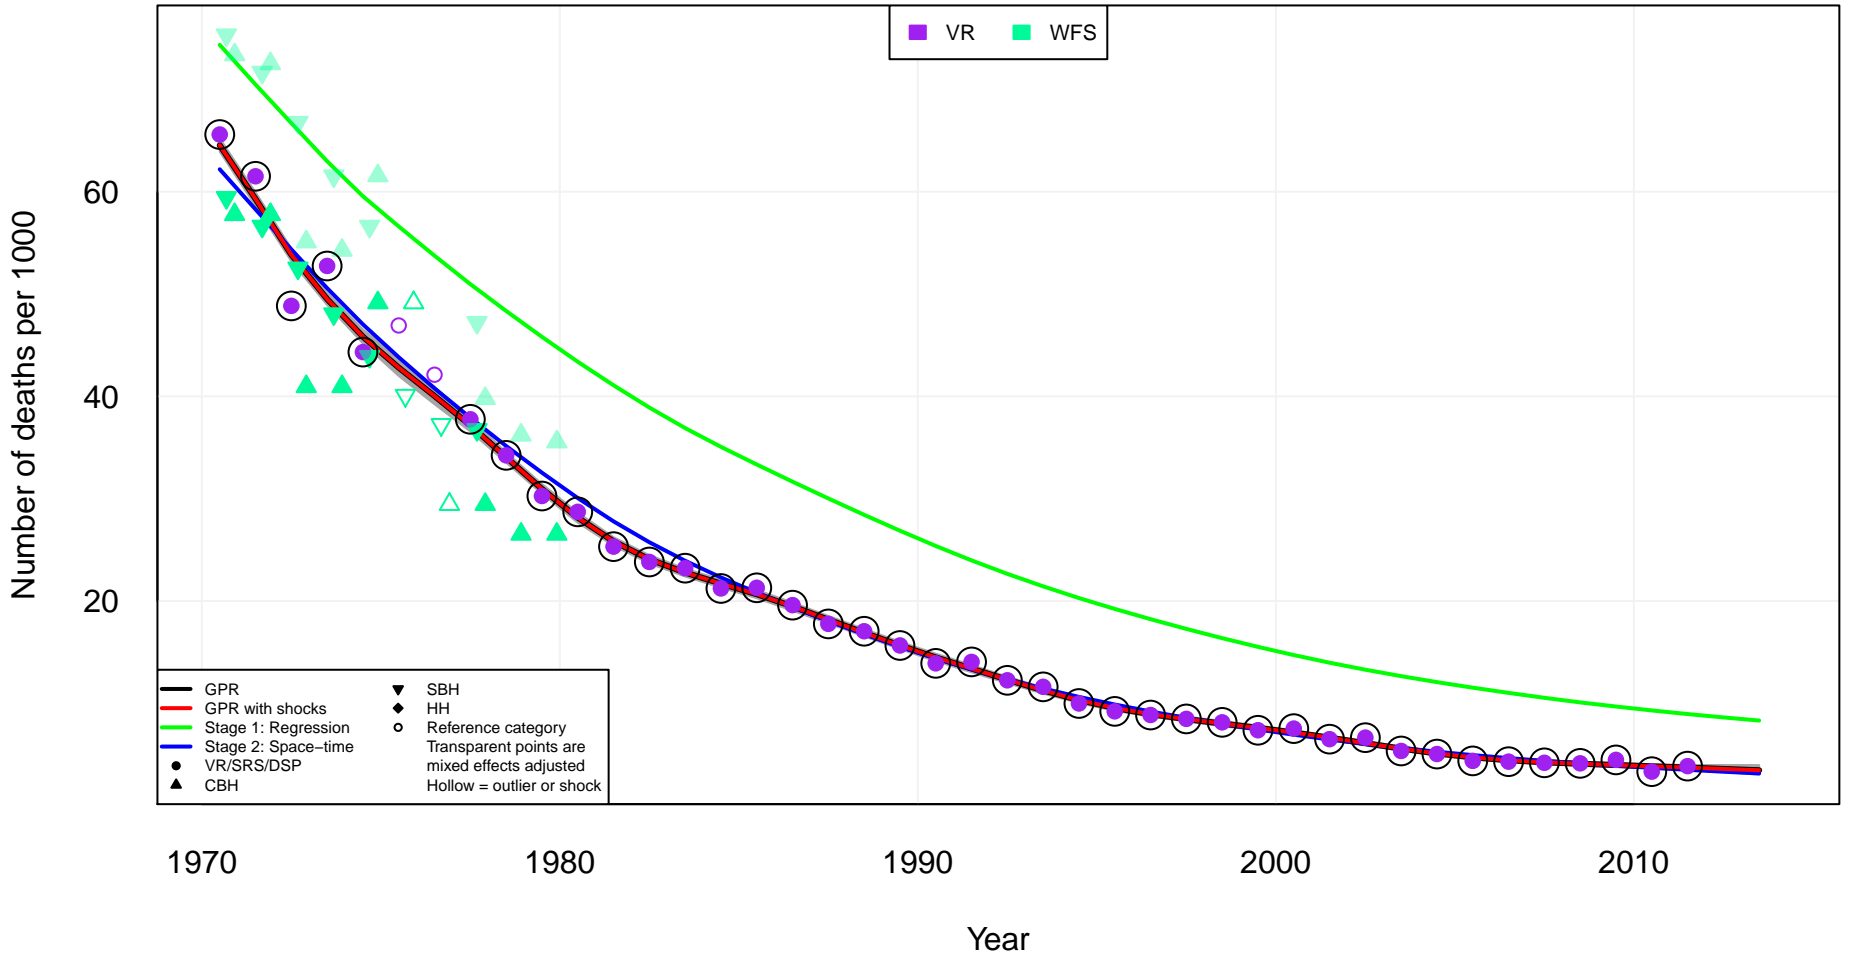



# Europe, Western Sweden (SWE)

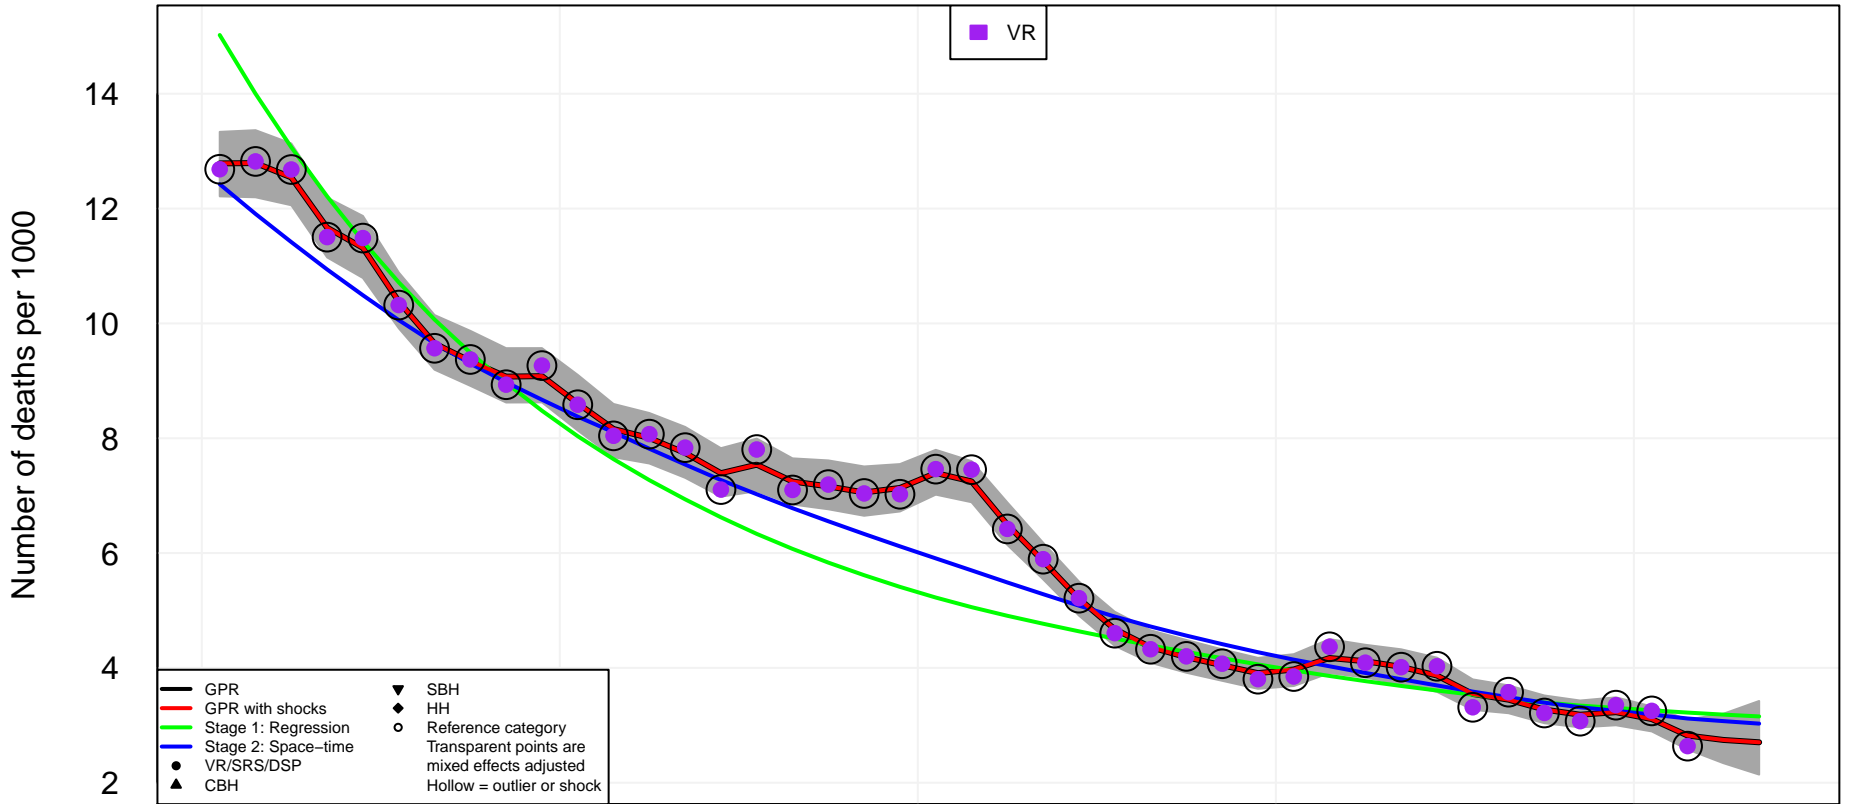

1970

1980

1990

2000

2010

Year

# Latin America, Andean Bolivia (BOL)

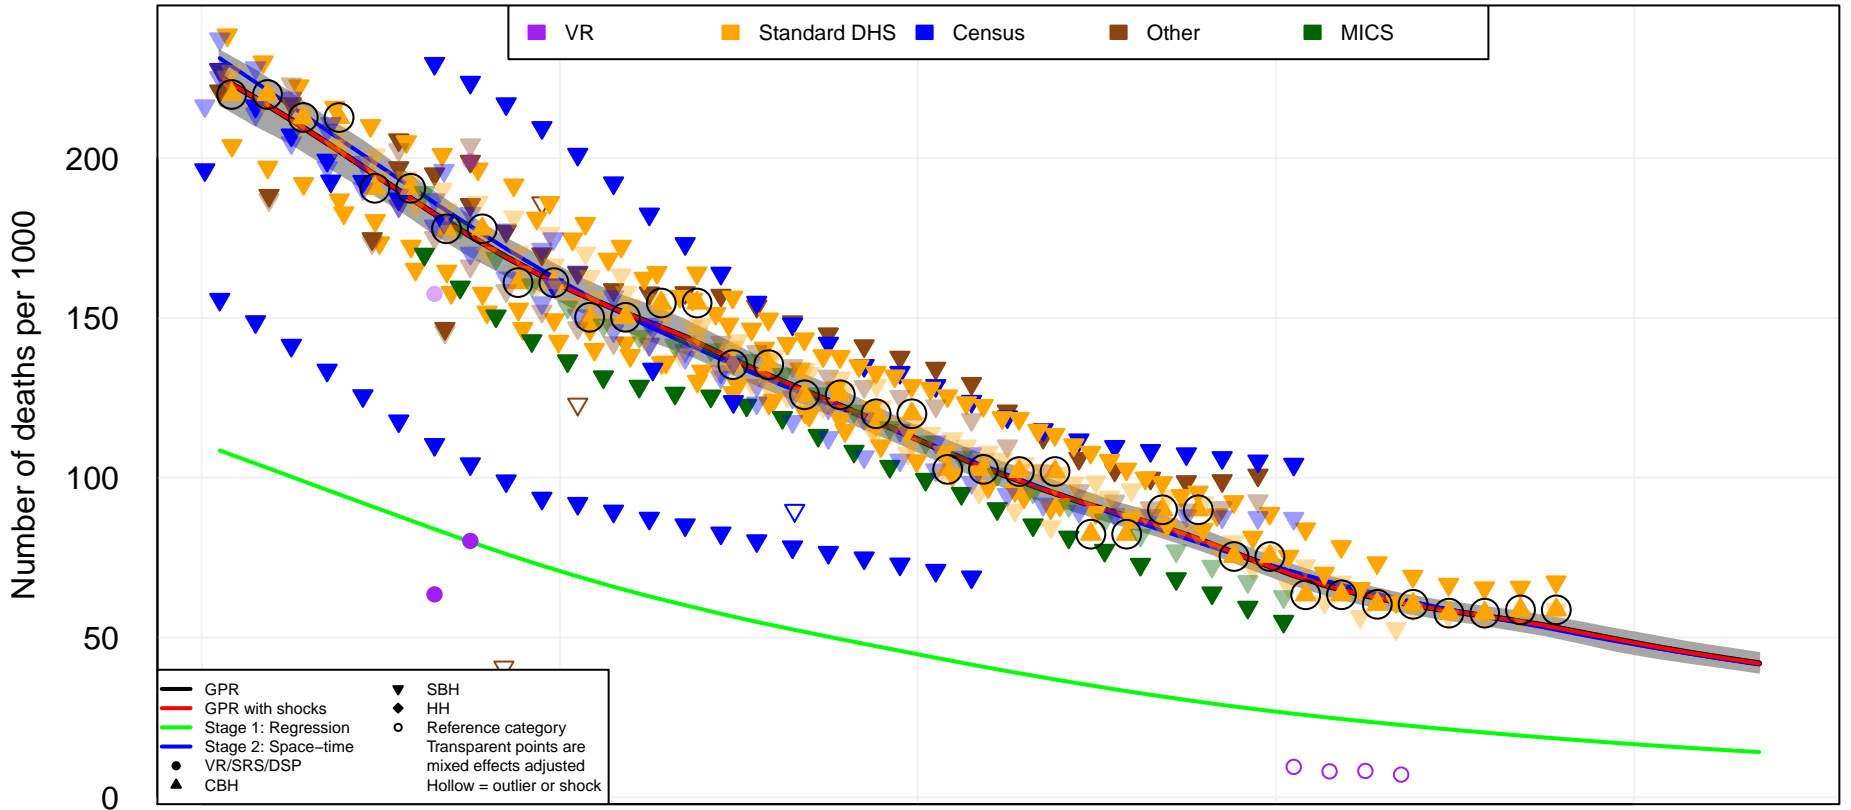

1970

1980

1990

2000

2010

Year

# Latin America, Andean Ecuador (ECU)

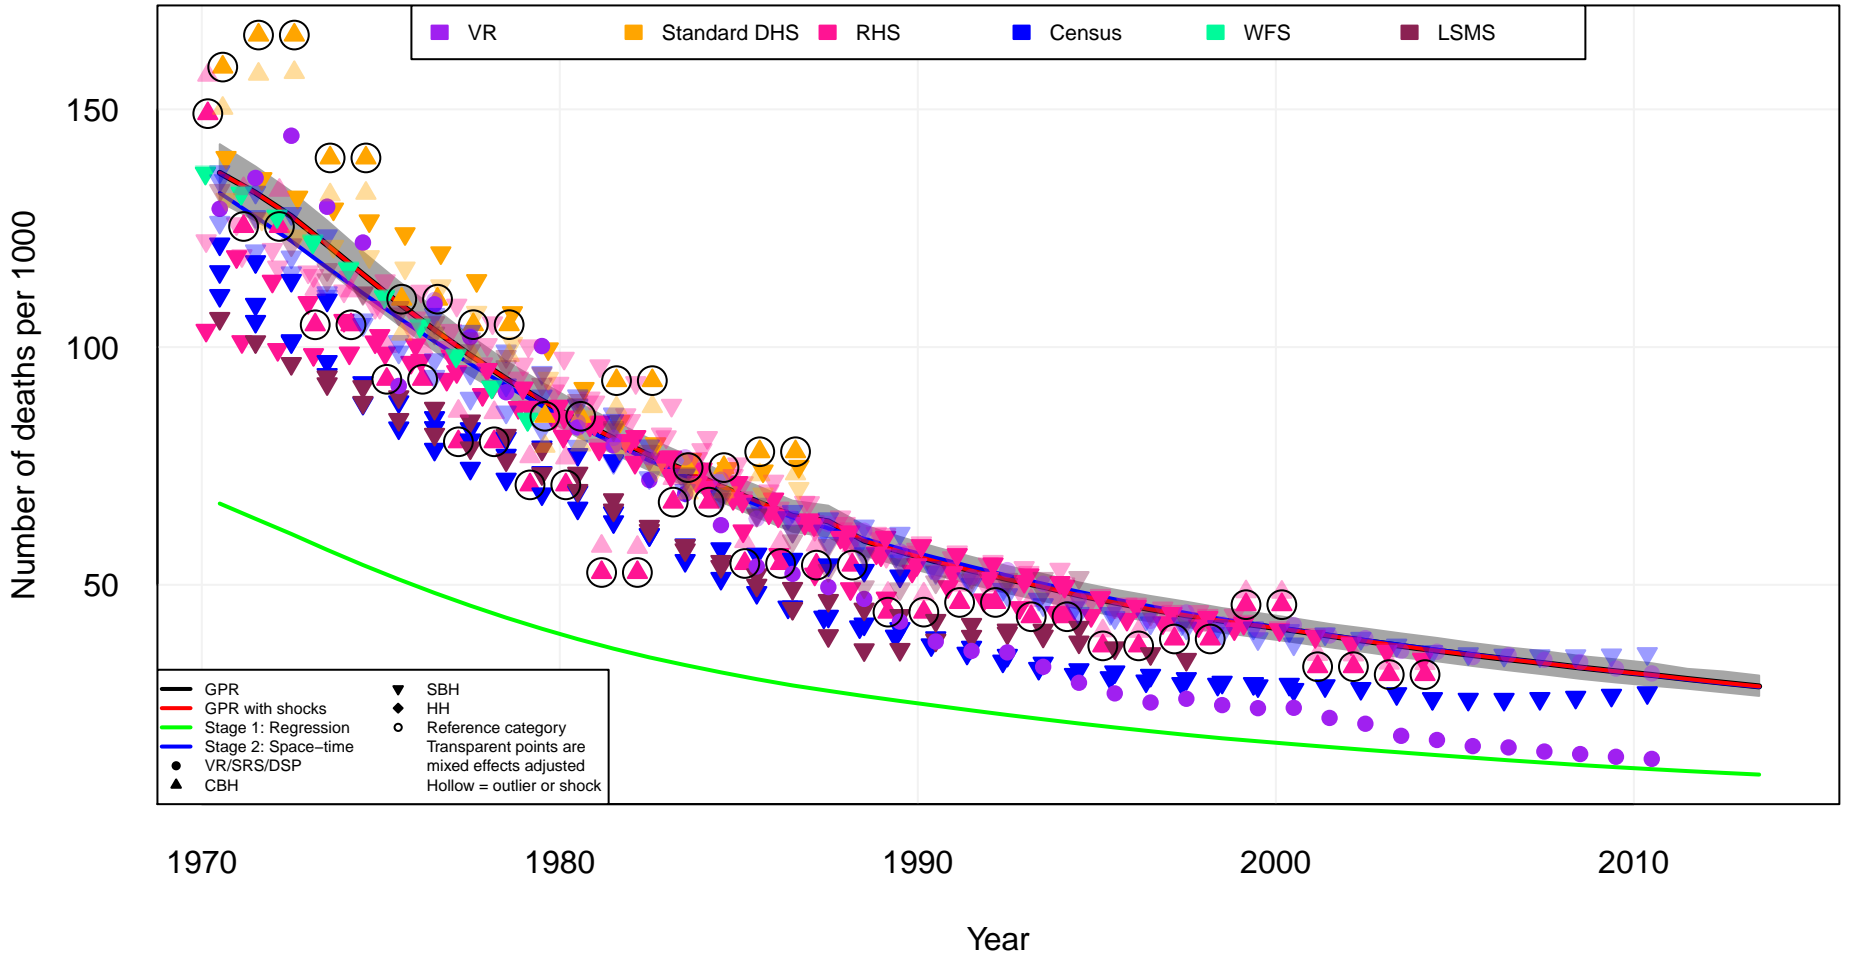

# Latin America, Andean Peru (PER)

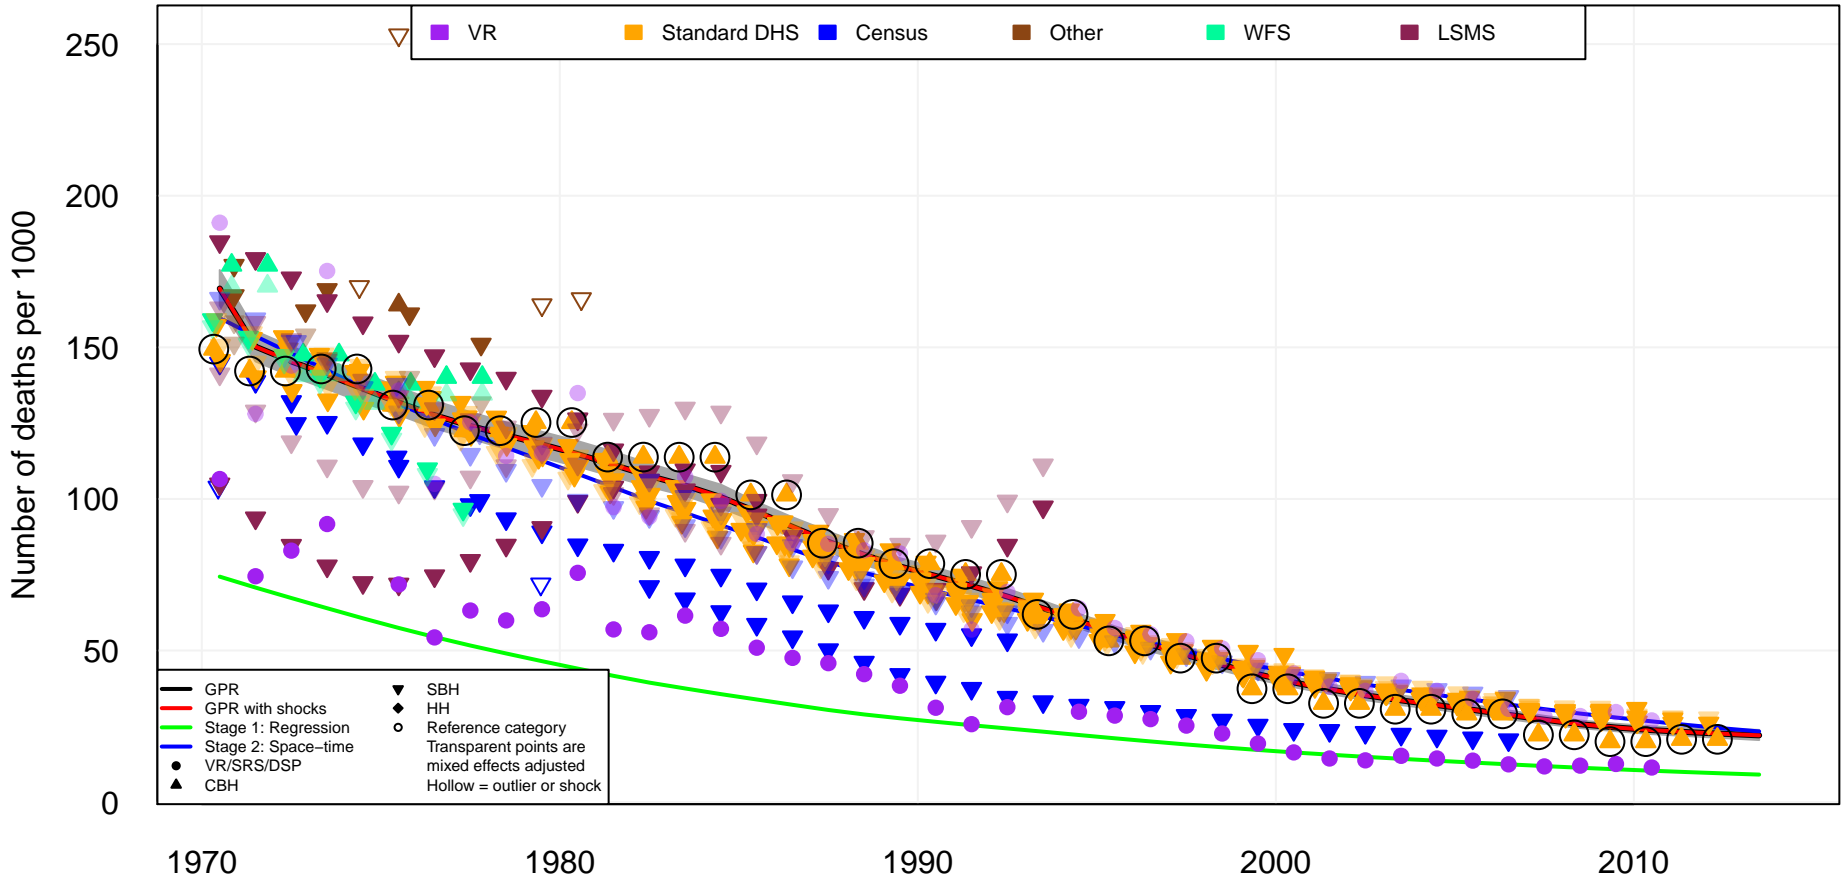

# Latin America, Central Colombia (COL)

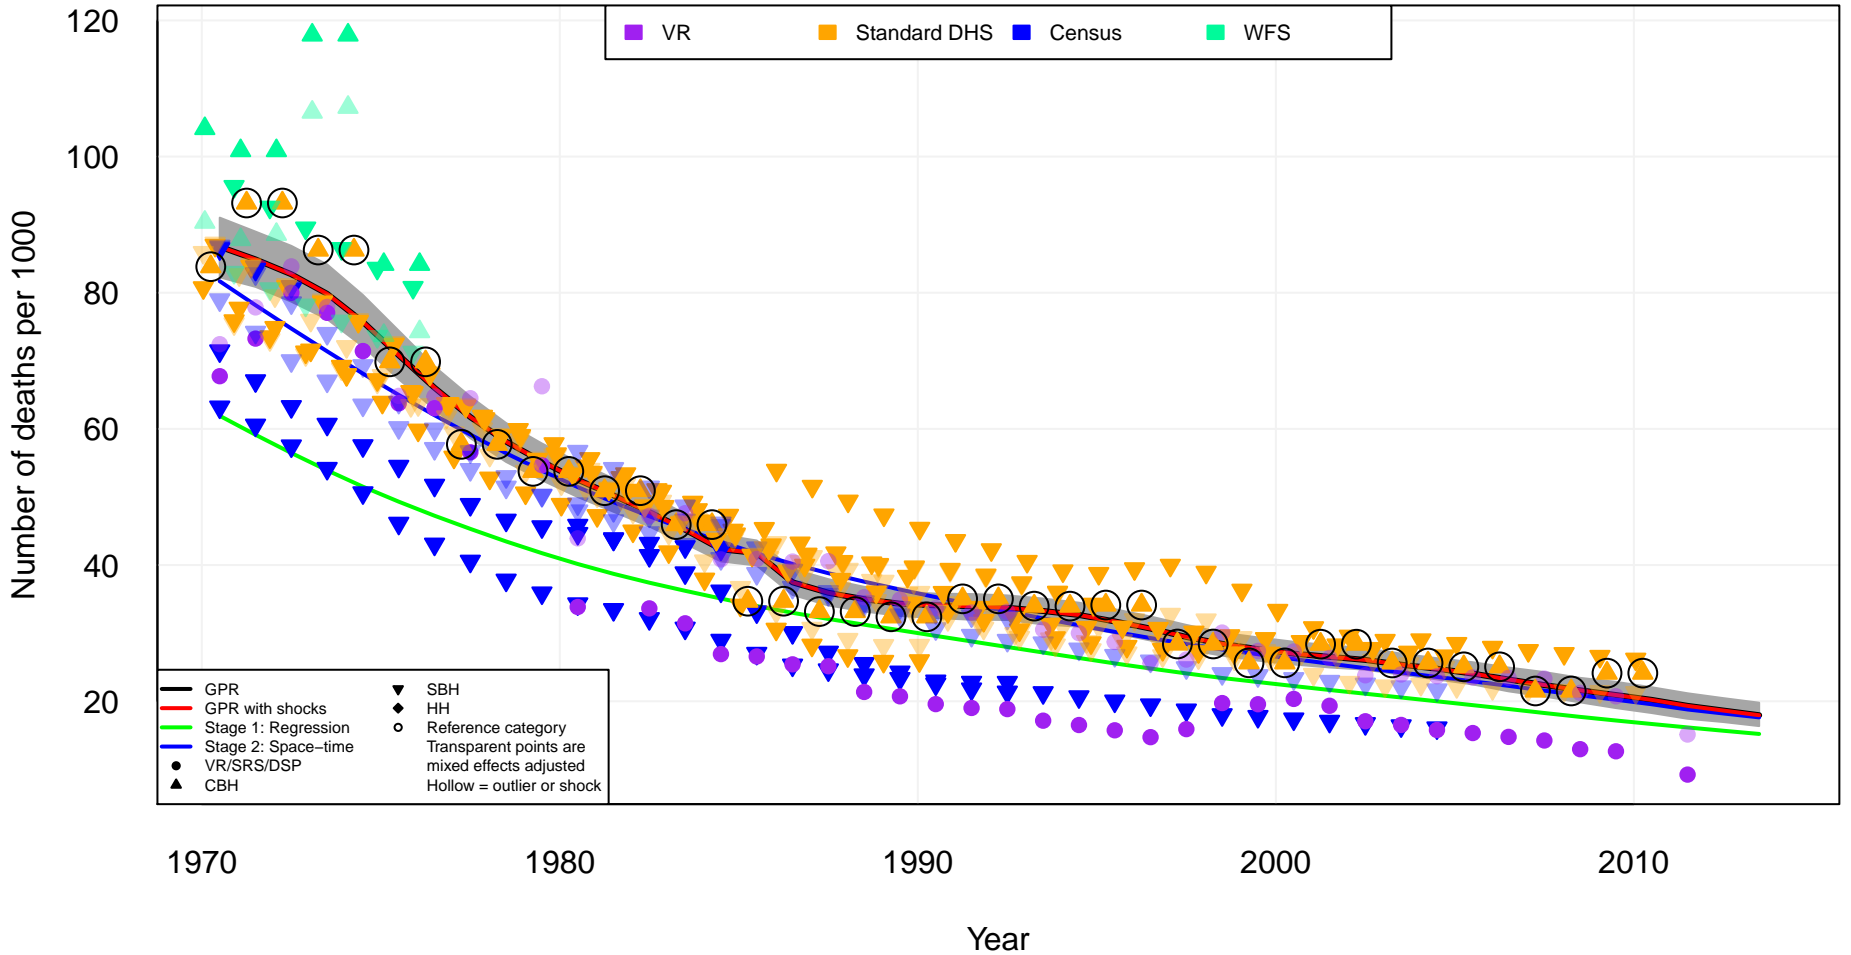

# Latin America, Central Costa Rica (CRI)

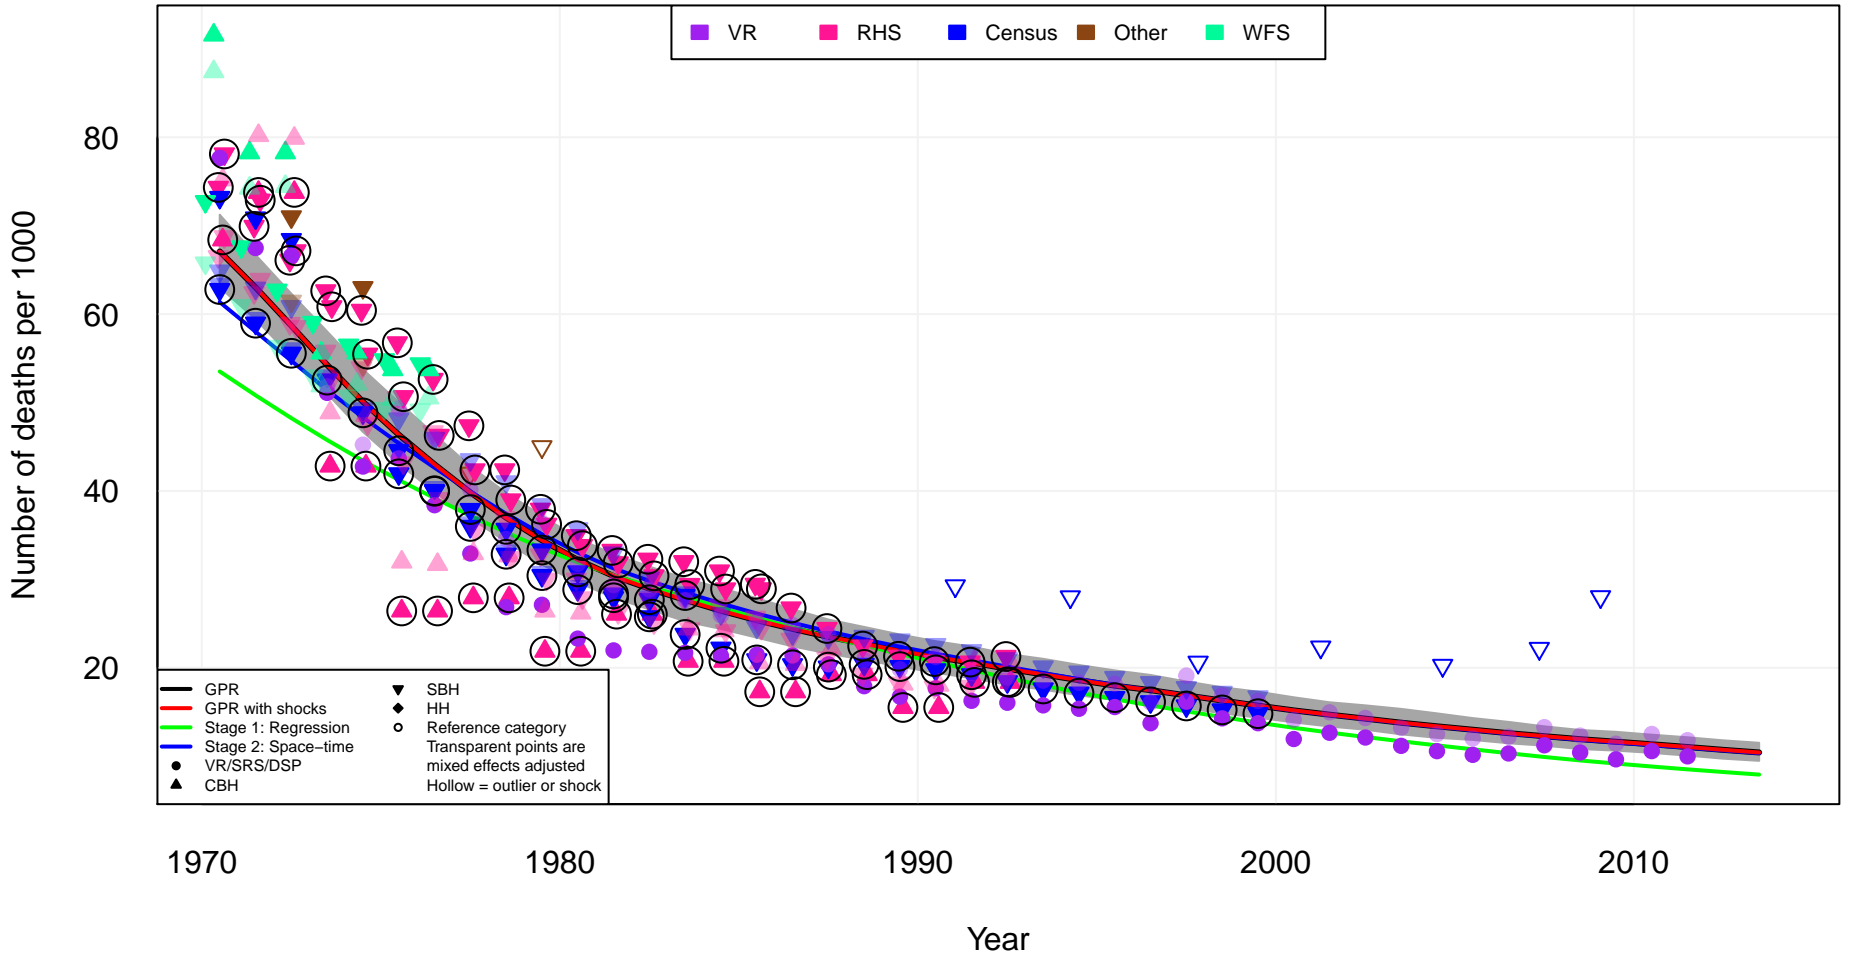

# Latin America, Central Guatemala (GTM)

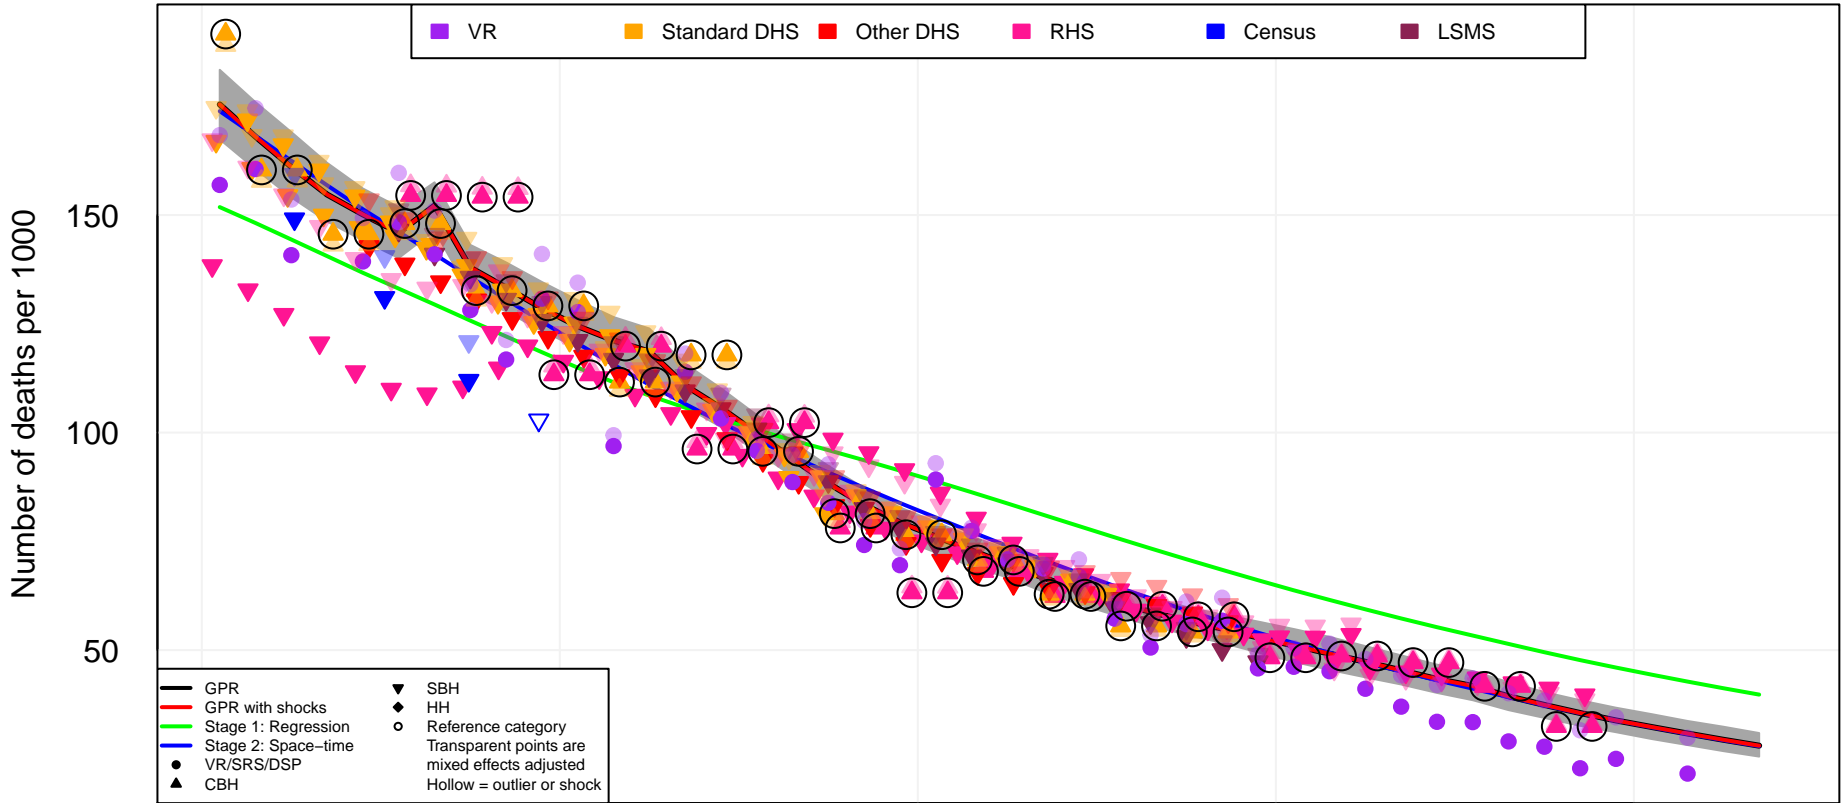

1970

1980

1990

2000

2010

Year

- GPR
- GPR with shocks
- Stage 1: Regression
- Stage 2: Space-time
- VR/SRS/DSP
- ▲ CBH
- ▼ SBH
- ◆ HH
- Reference category
- Transparent points are mixed effects adjusted
- Hollow = outlier or shock

# Latin America, Central Honduras (HND)

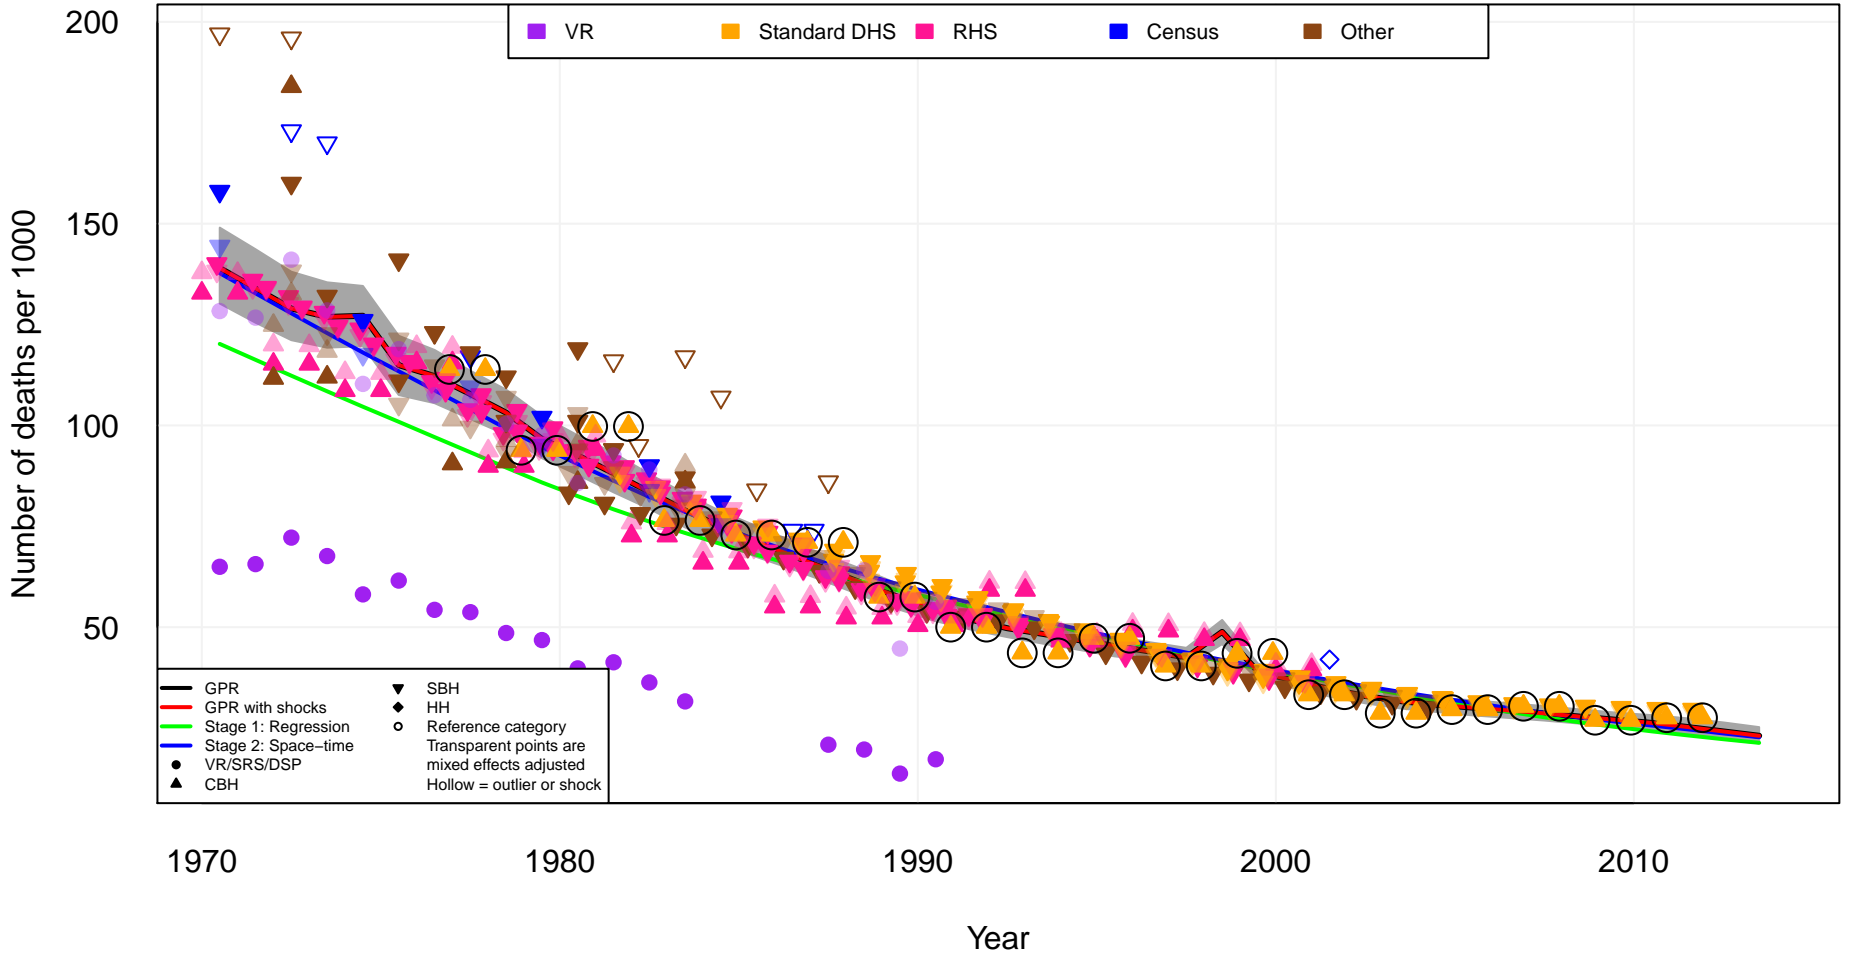



# Latin America, Central Mexico (MEX)

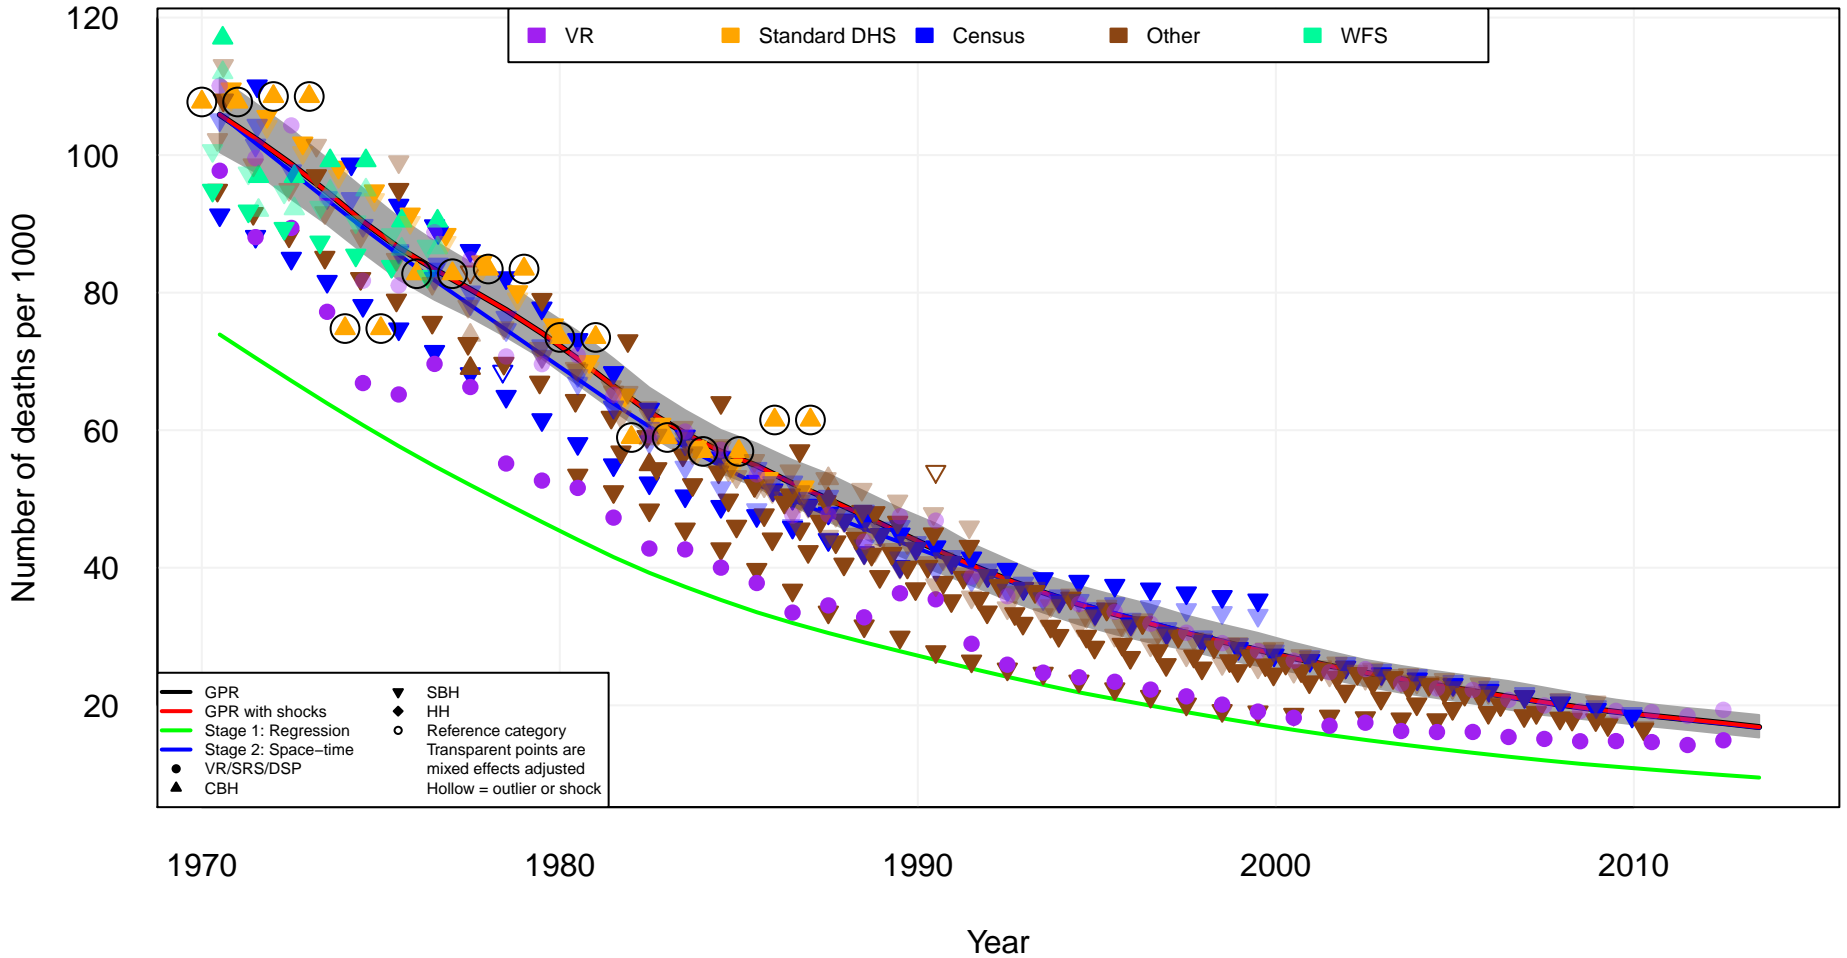



# Latin America, Central Panama (PAN)

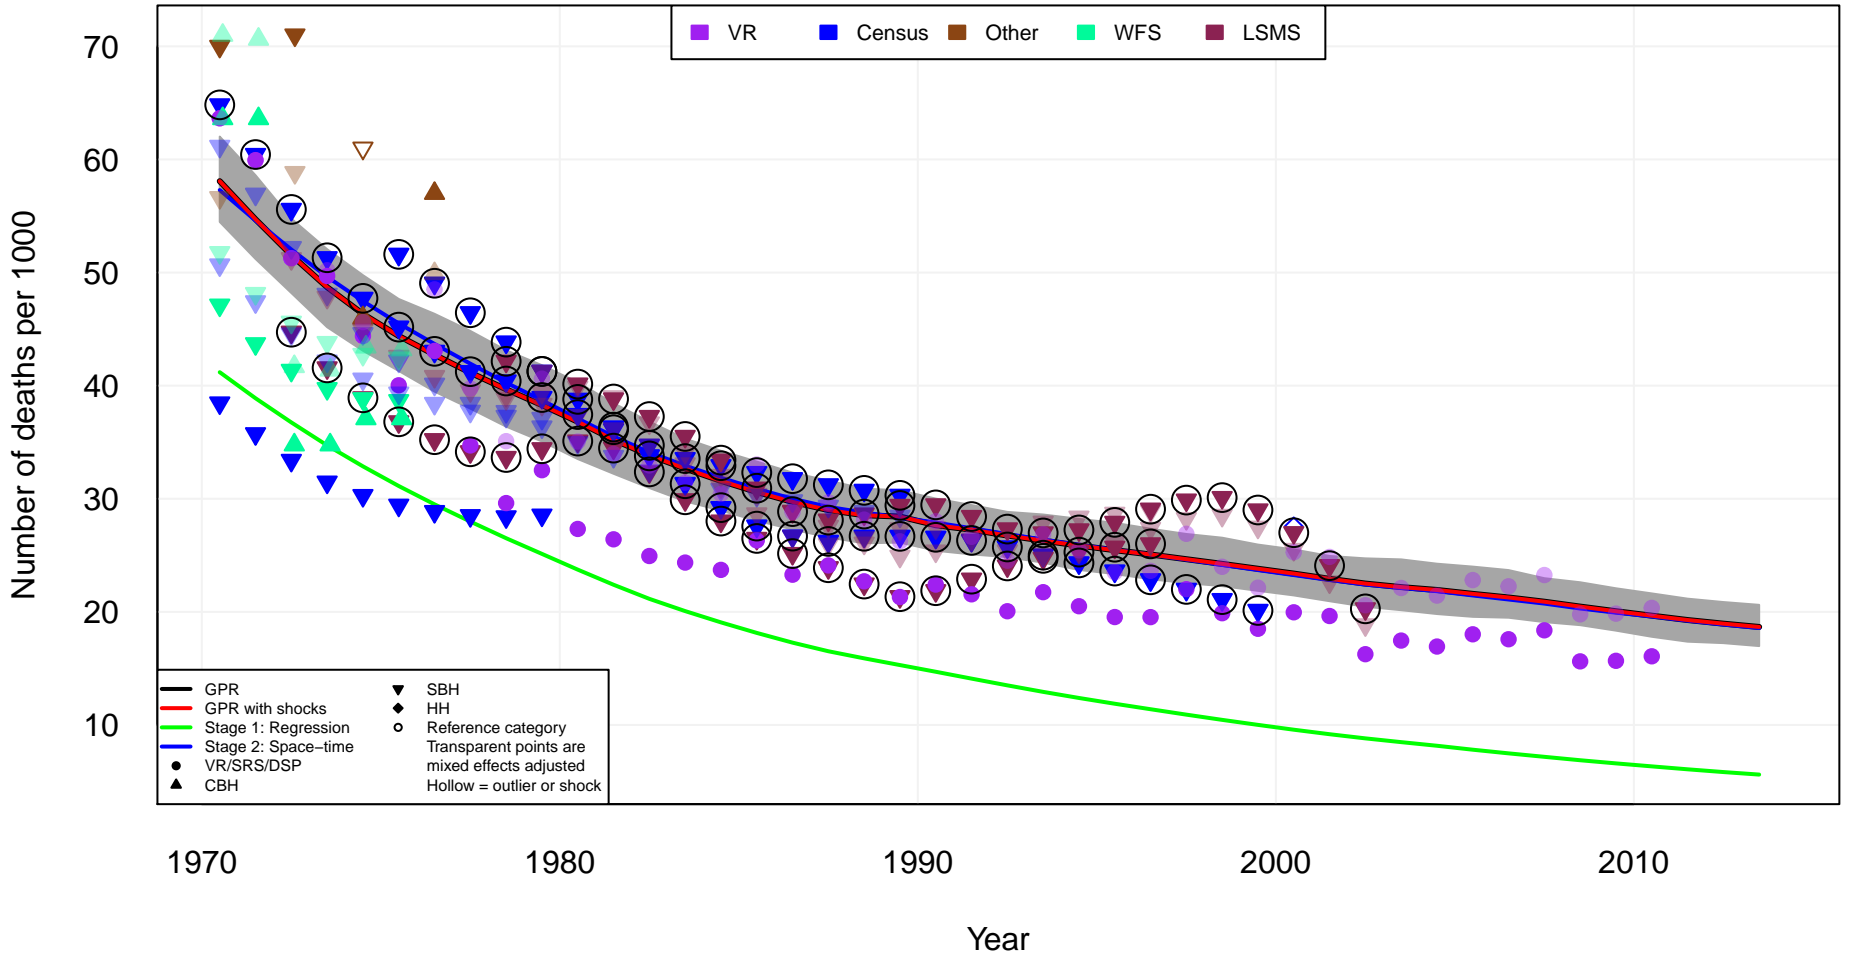

# Latin America, Central El Salvador (SLV)

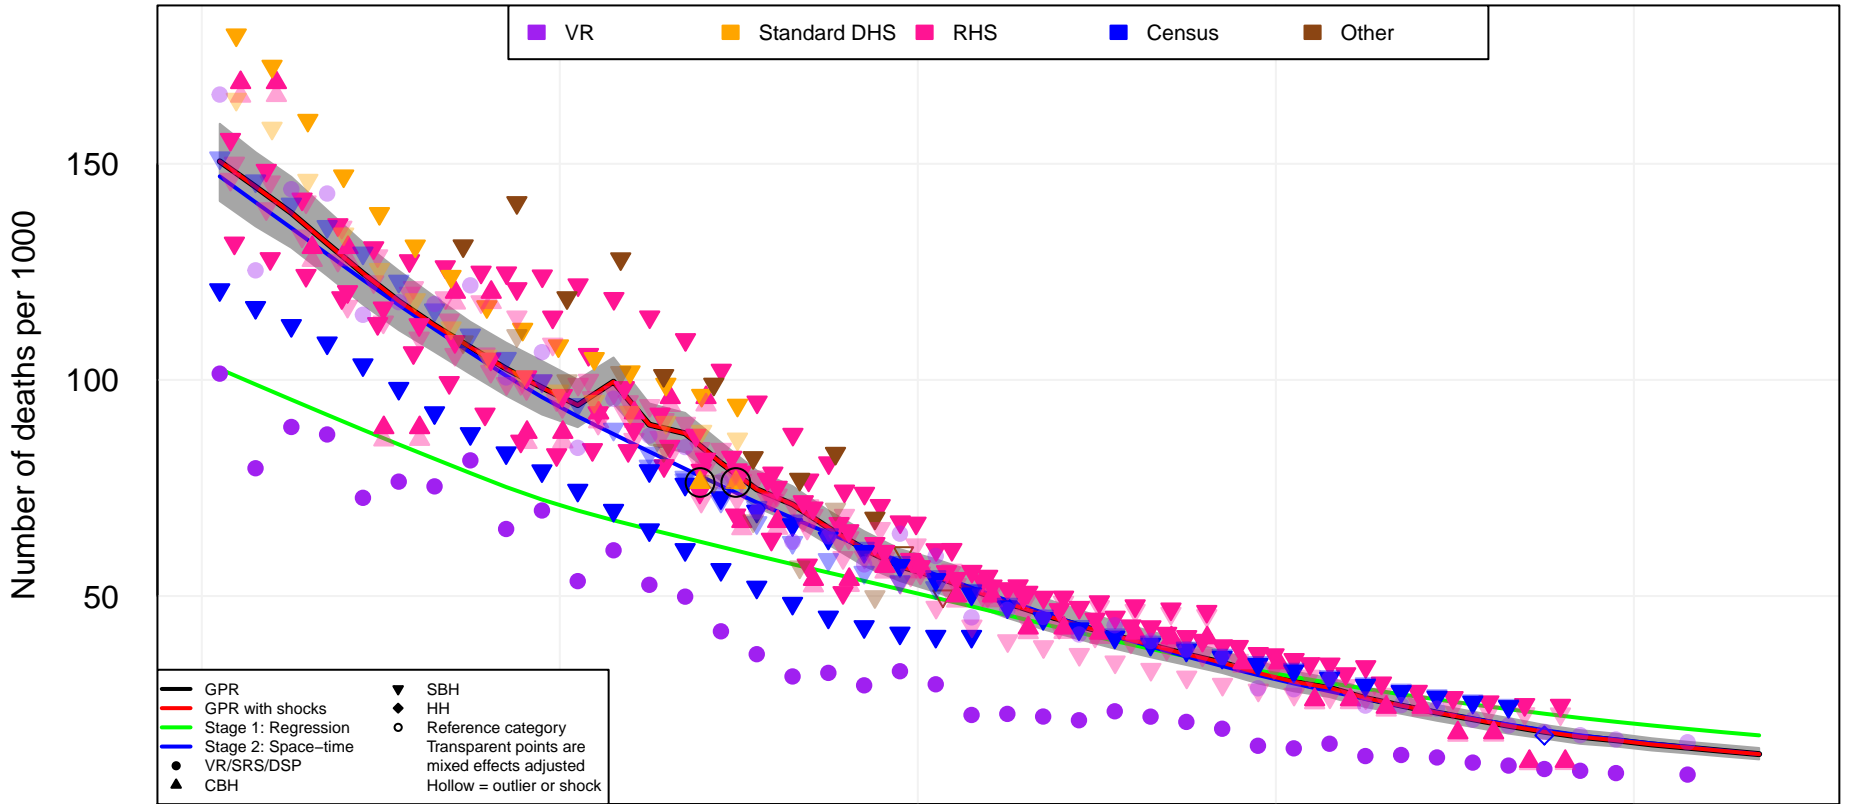

1970

1980

1990

2000

2010

Year

# Latin America, Central Venezuela (VEN)

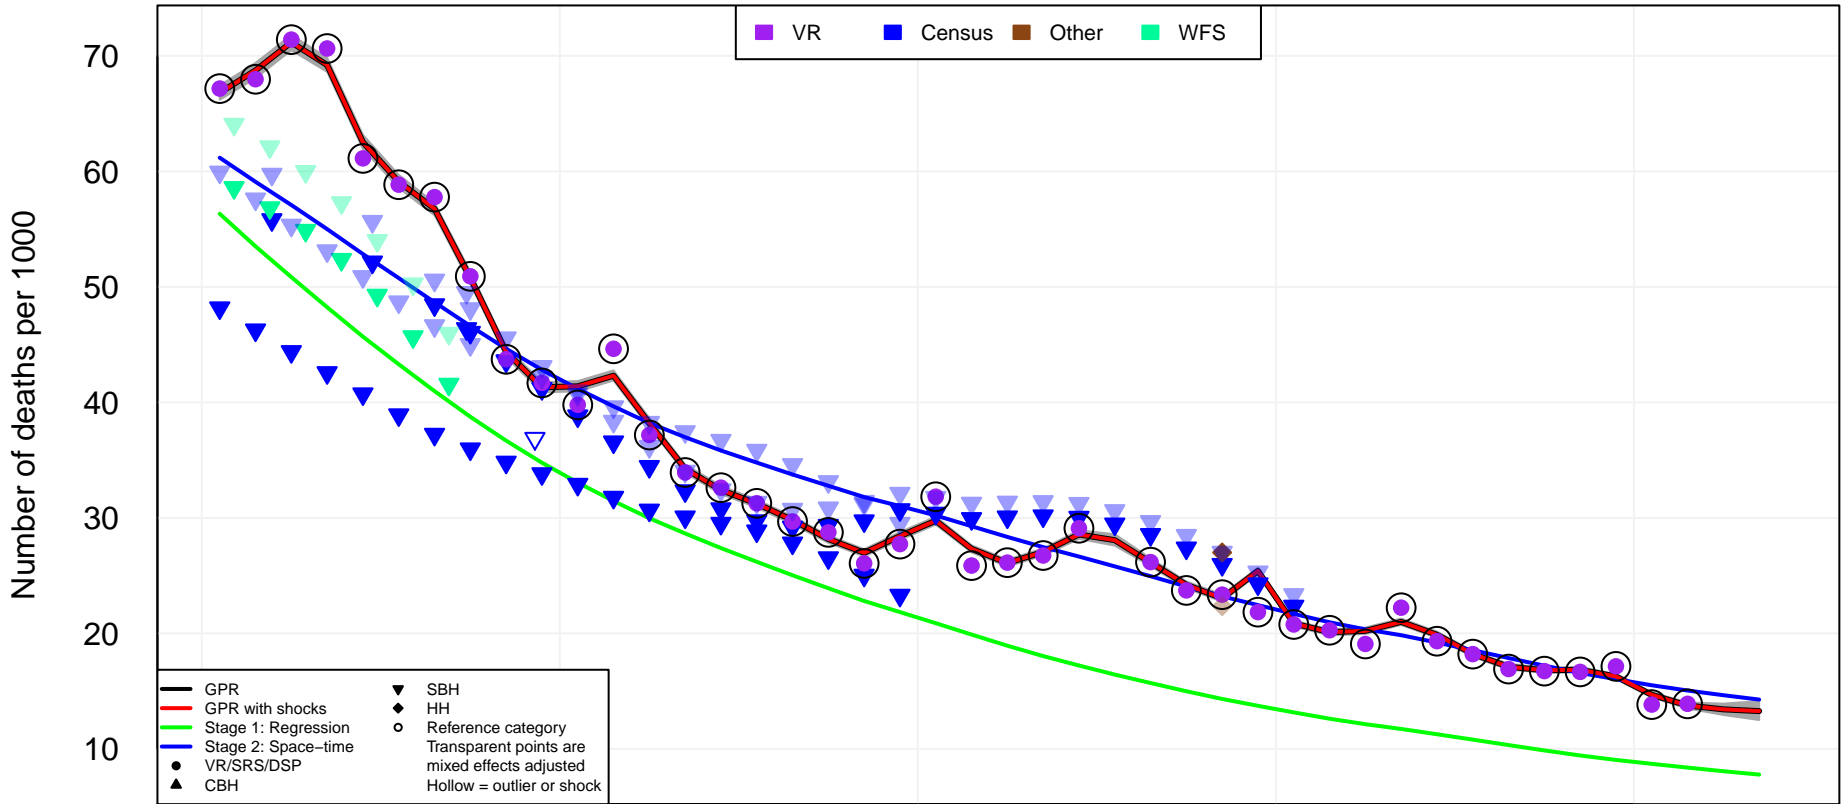

— GPR  
 — GPR with shocks  
 — Stage 1: Regression  
 — Stage 2: Space-time  
 ● VR/SRS/DSP  
 ▲ CBH  
 ▼ SBH  
 ◆ HH  
 ○ Reference category  
 Transparent points are mixed effects adjusted  
 Hollow = outlier or shock

1970

1980

1990

2000

2010

Year

# Latin America, Southern Argentina (ARG)

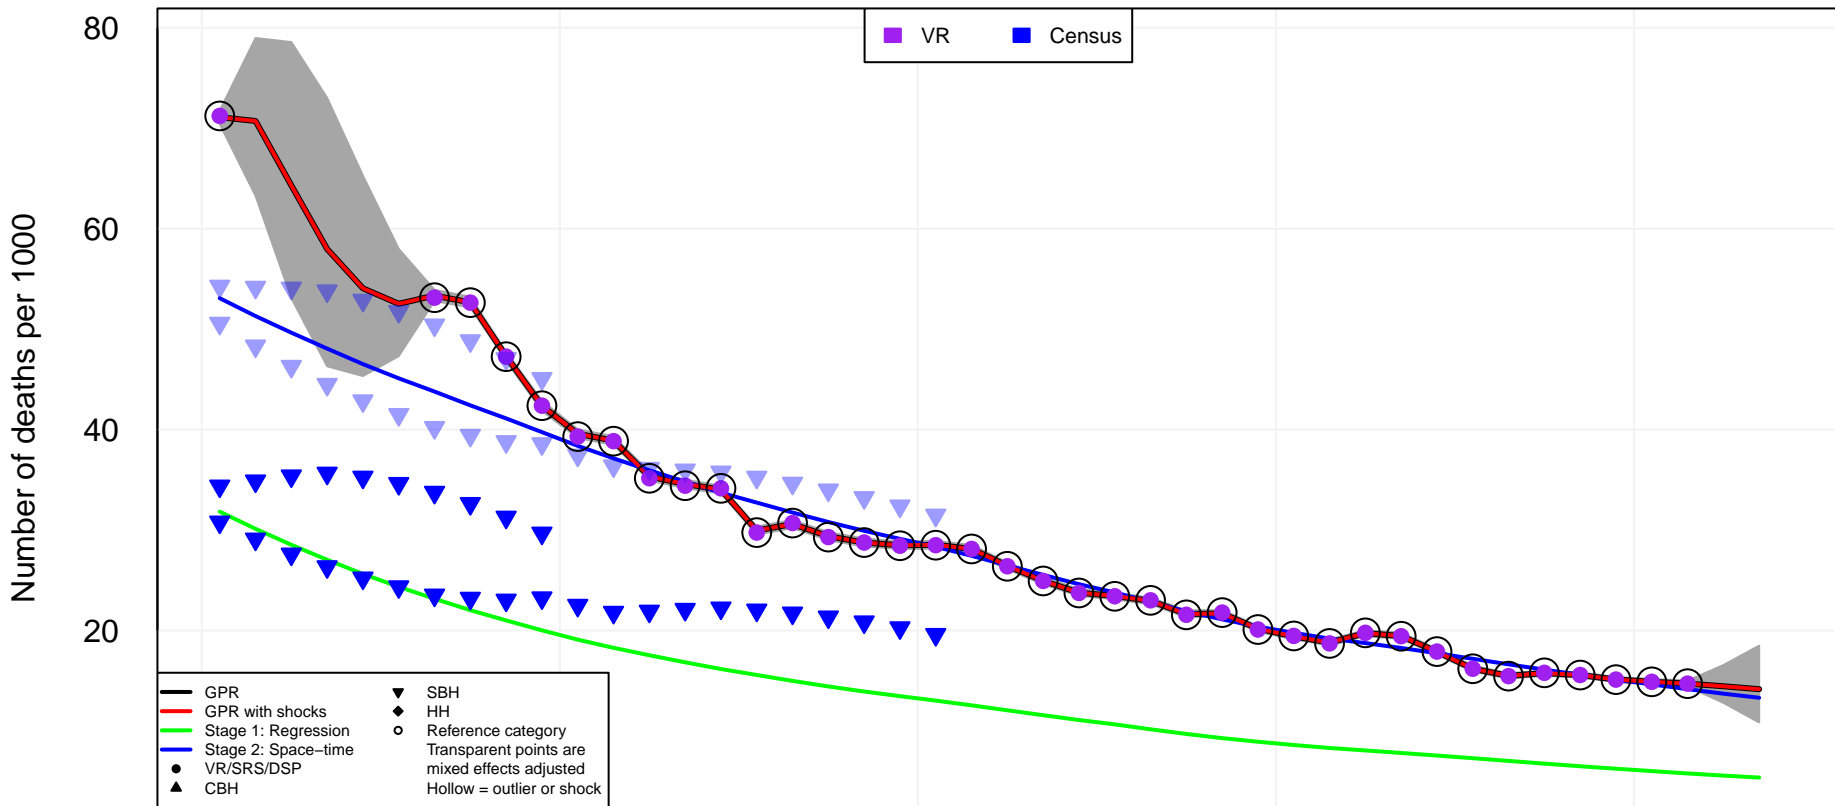

1970

1980

1990

2000

2010

Year

# Latin America, Southern Chile (CHL)

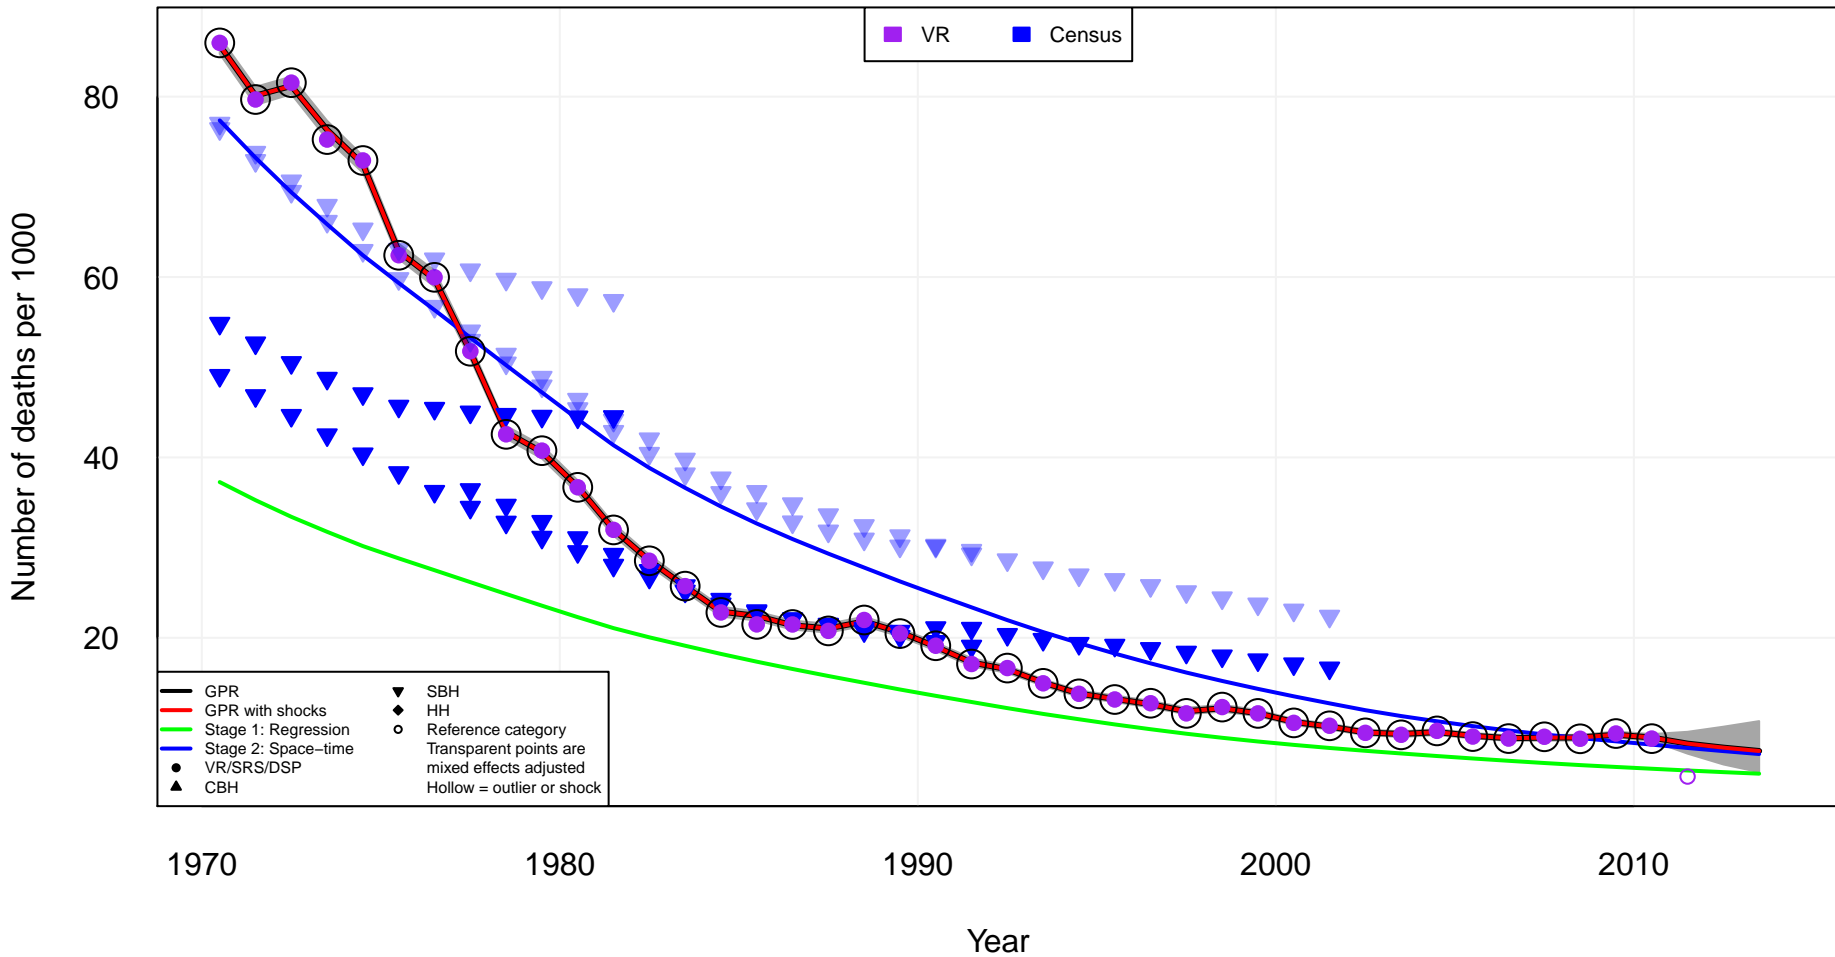

# Latin America, Southern Uruguay (URY)

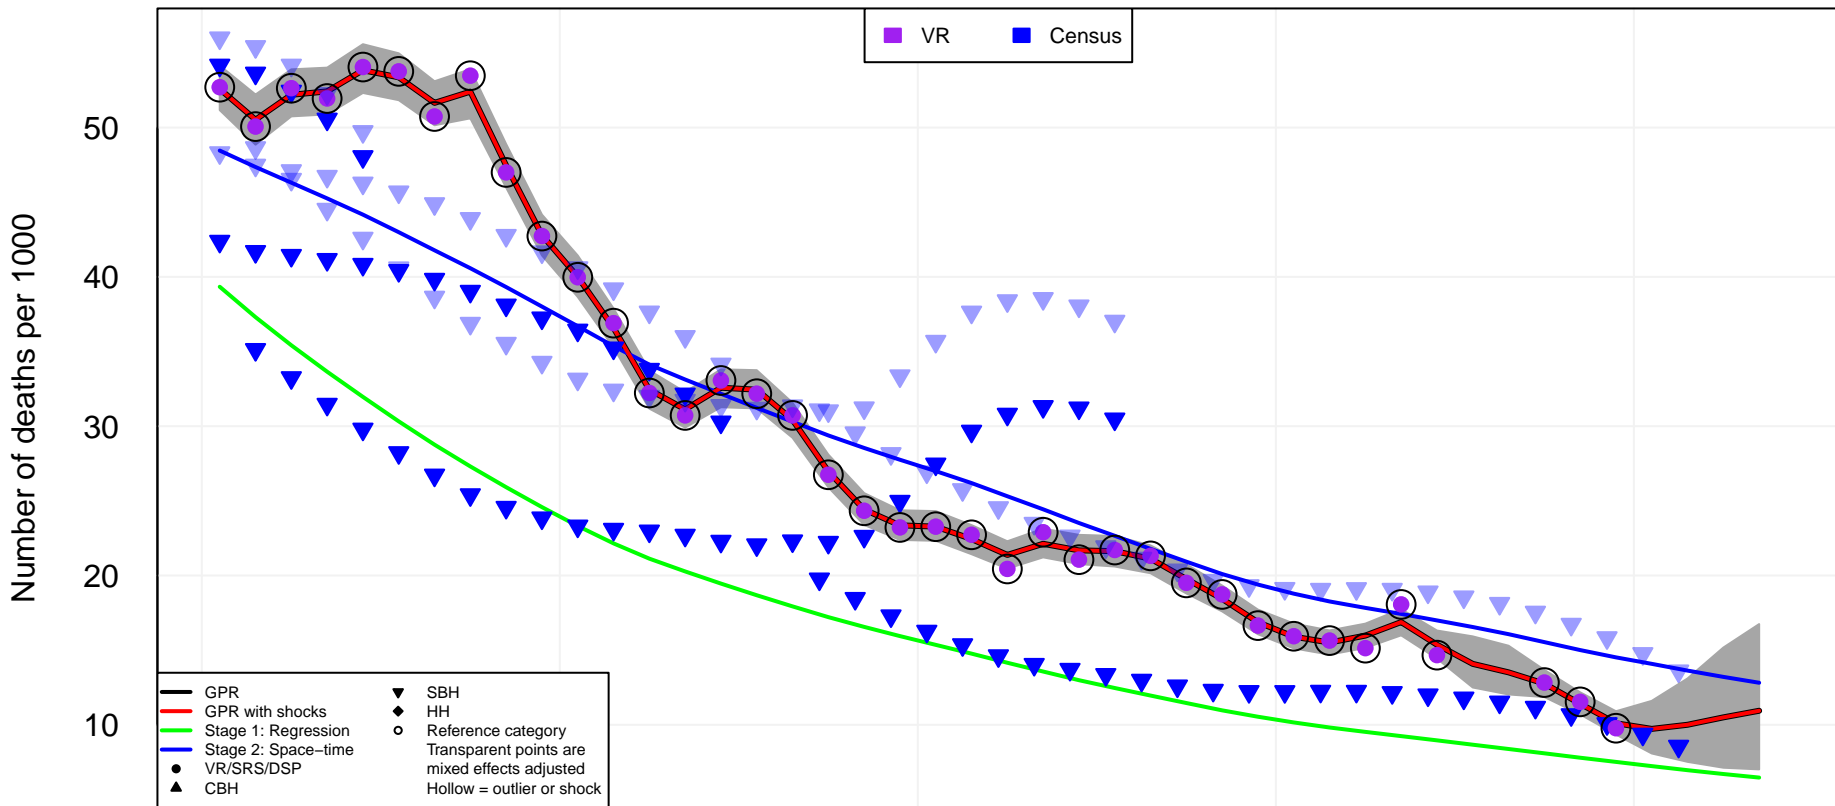

1970

1980

1990

2000

2010

Year





# Latin America, Tropical Paraguay (PRY)

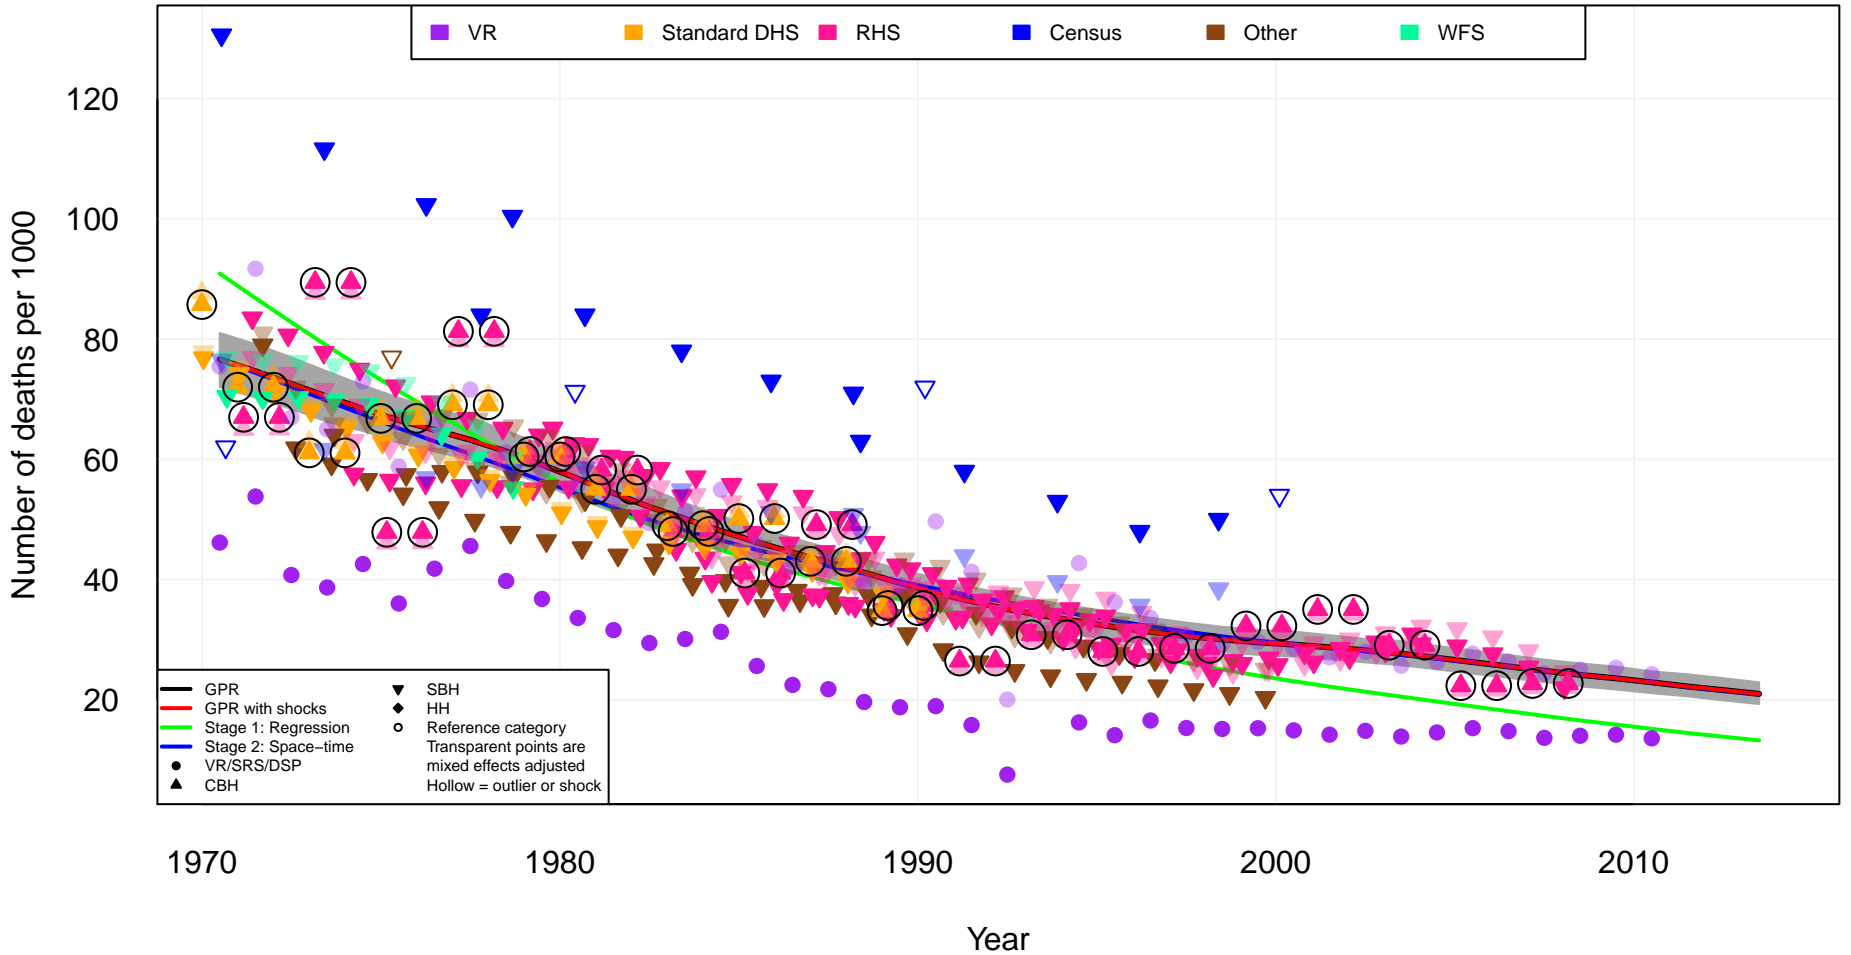

# North Africa/Middle East Afghanistan (AFG)

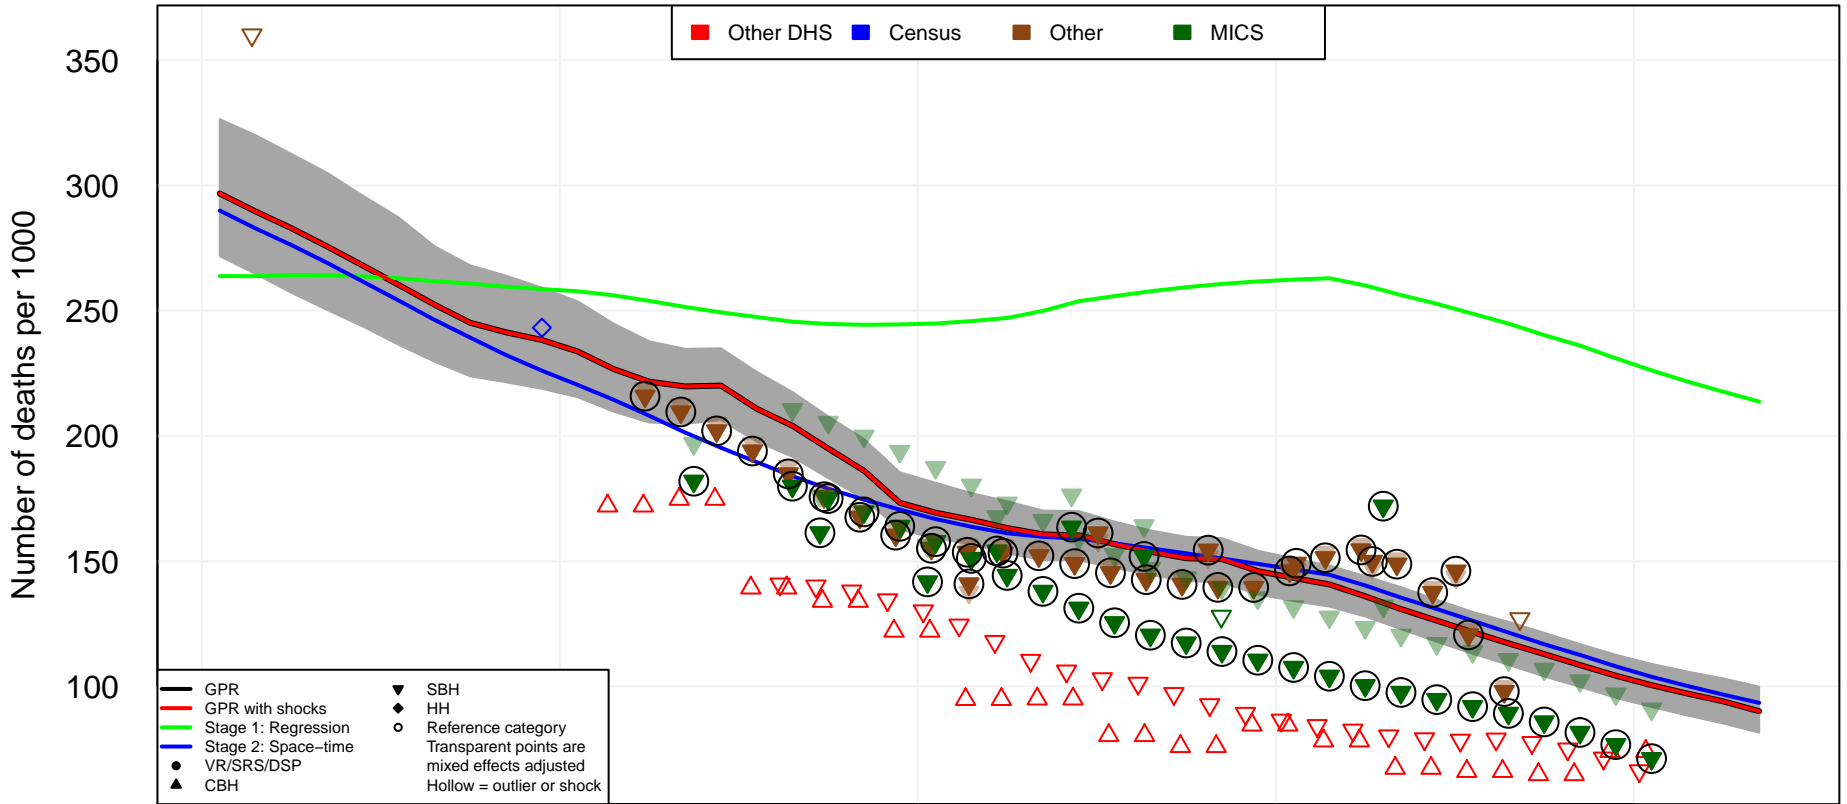

1970

1980

1990

2000

2010

Year

# North Africa/Middle East United Arab Emirates (ARE)

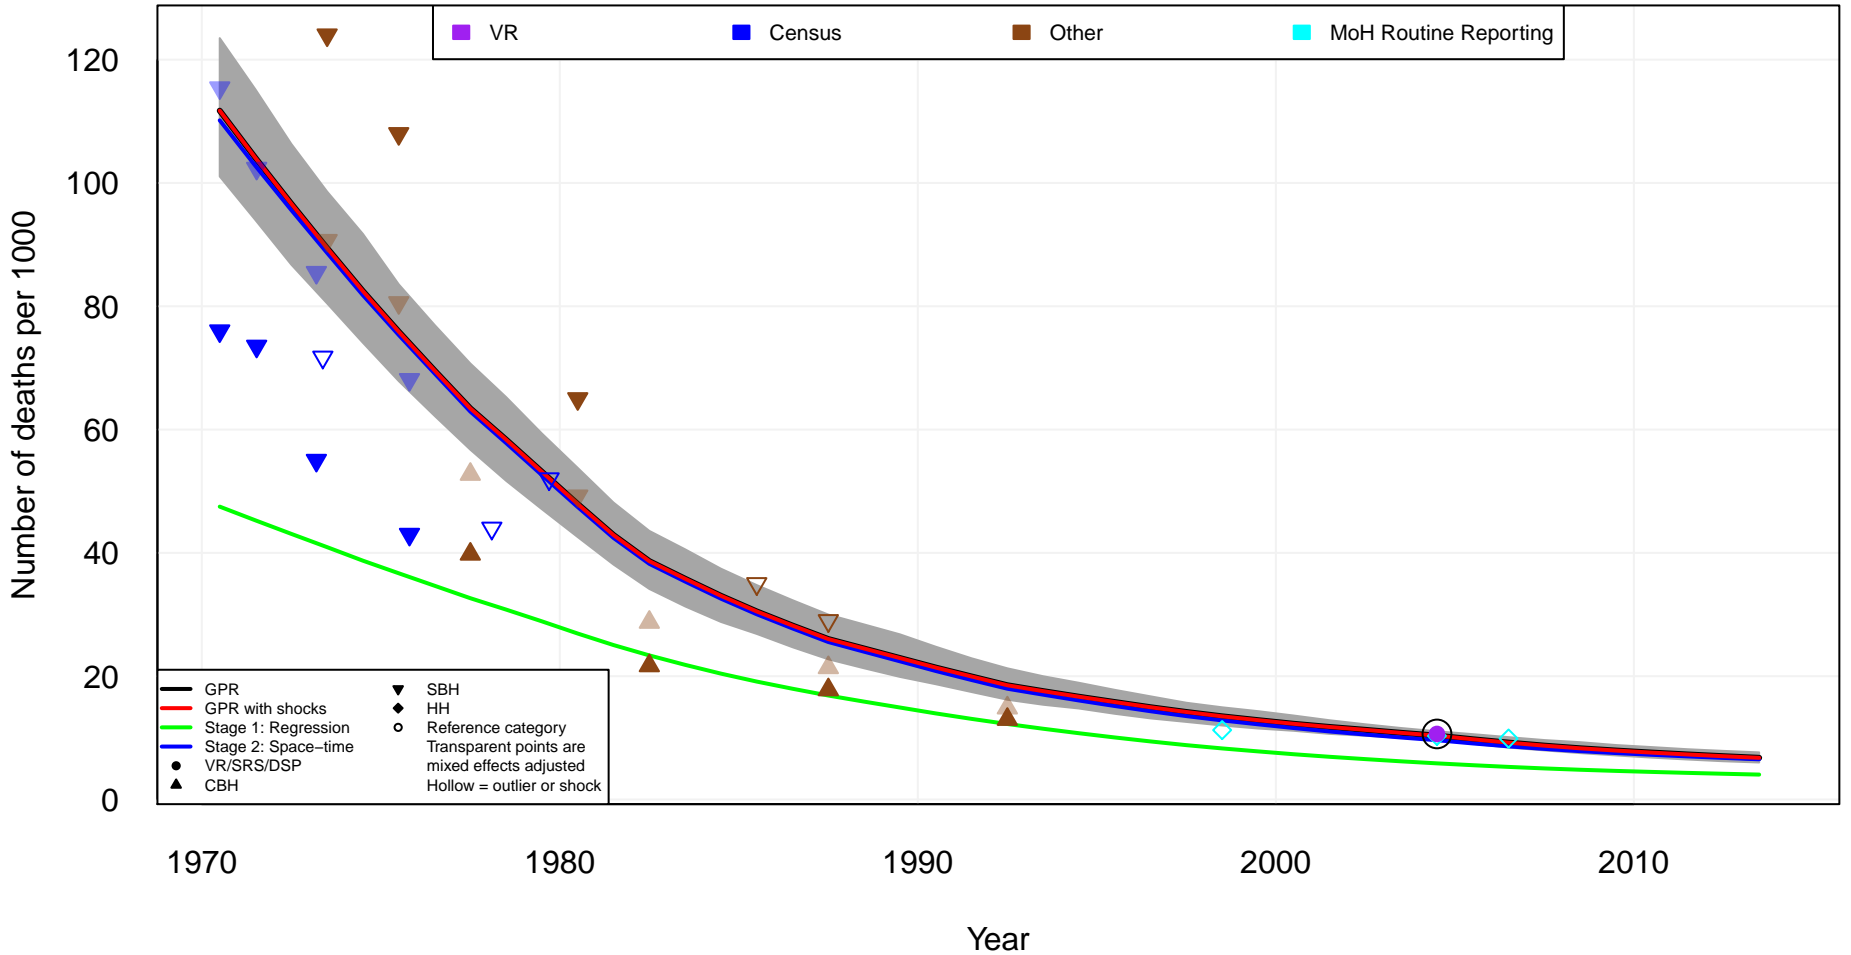

# North Africa/Middle East Bahrain (BHR)

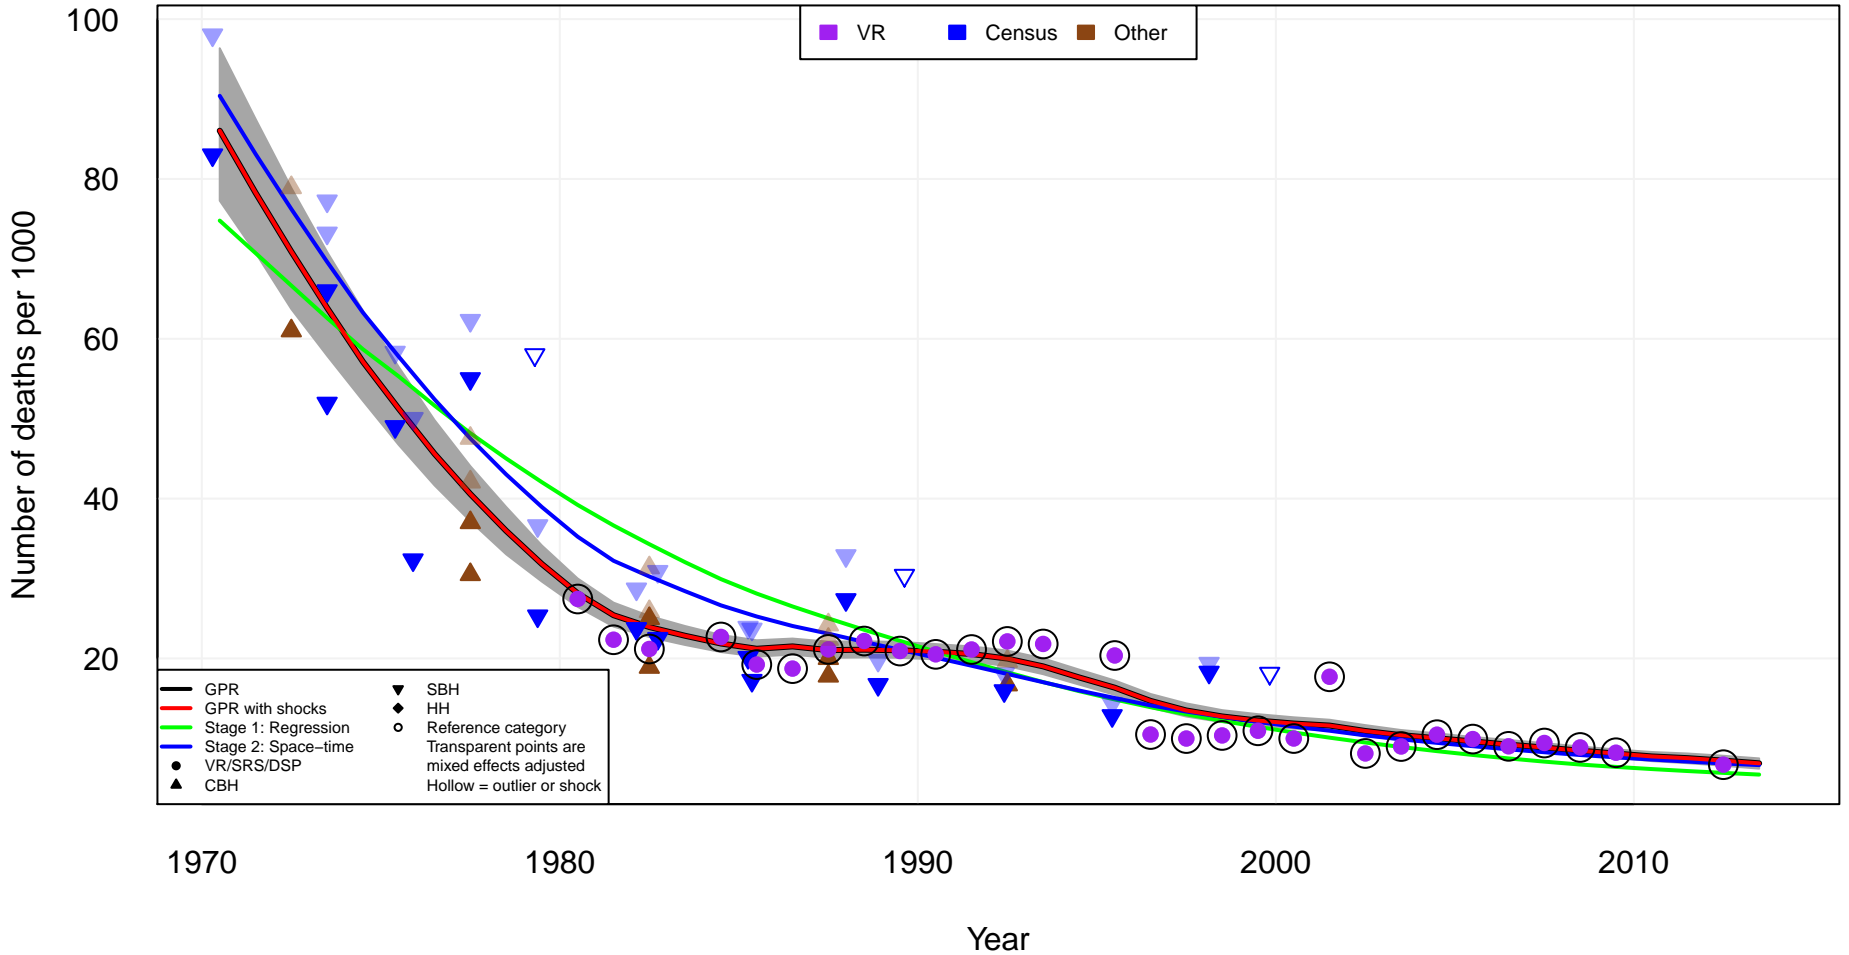

# North Africa/Middle East Algeria (DZA)

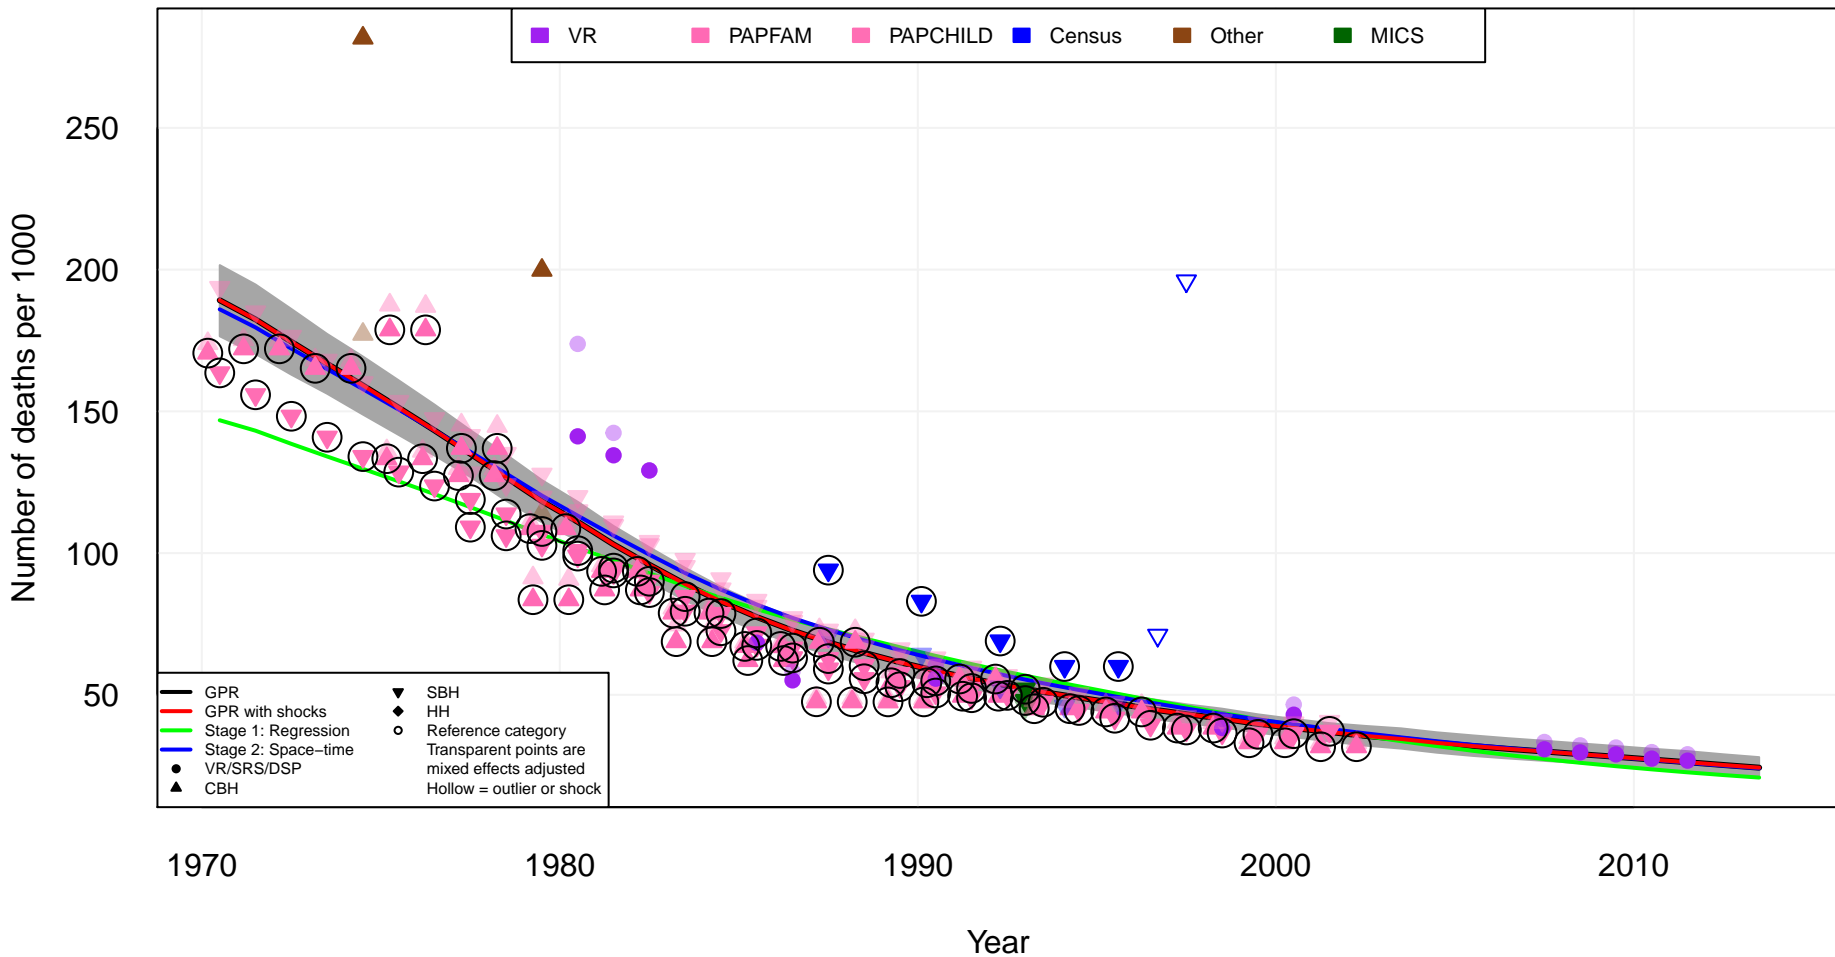

# North Africa/Middle East Egypt (EGY)

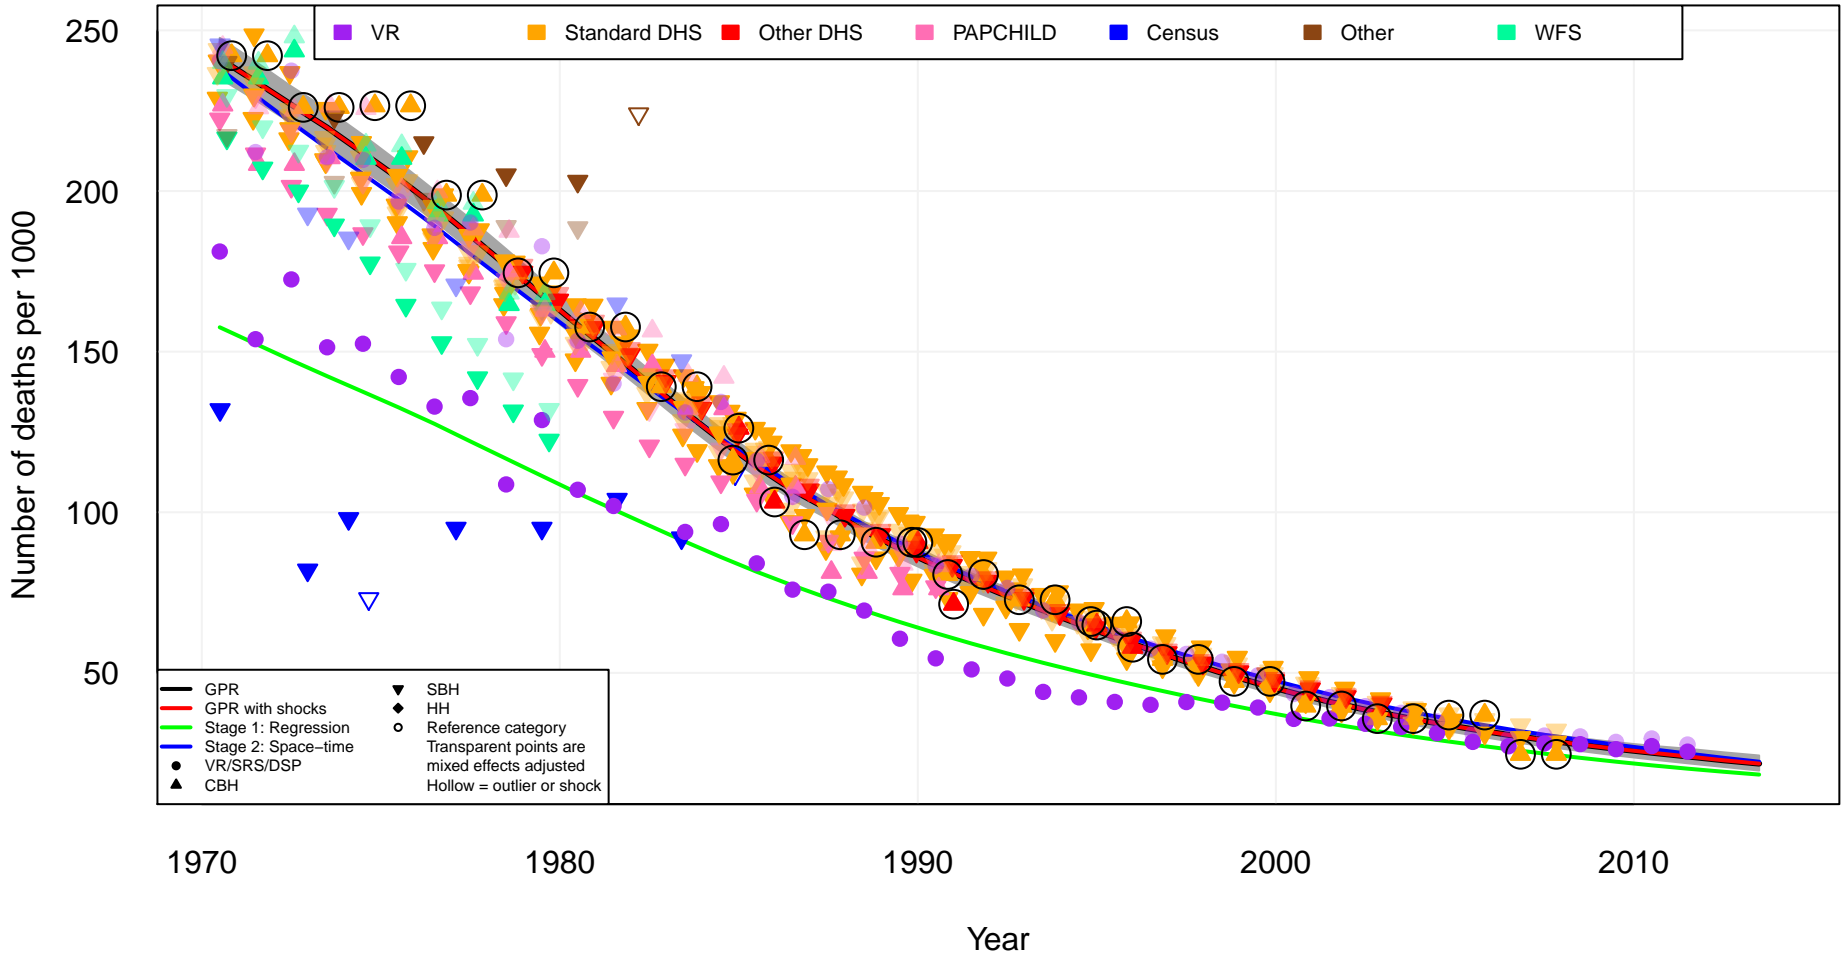

# North Africa/Middle East Iran (IRN)

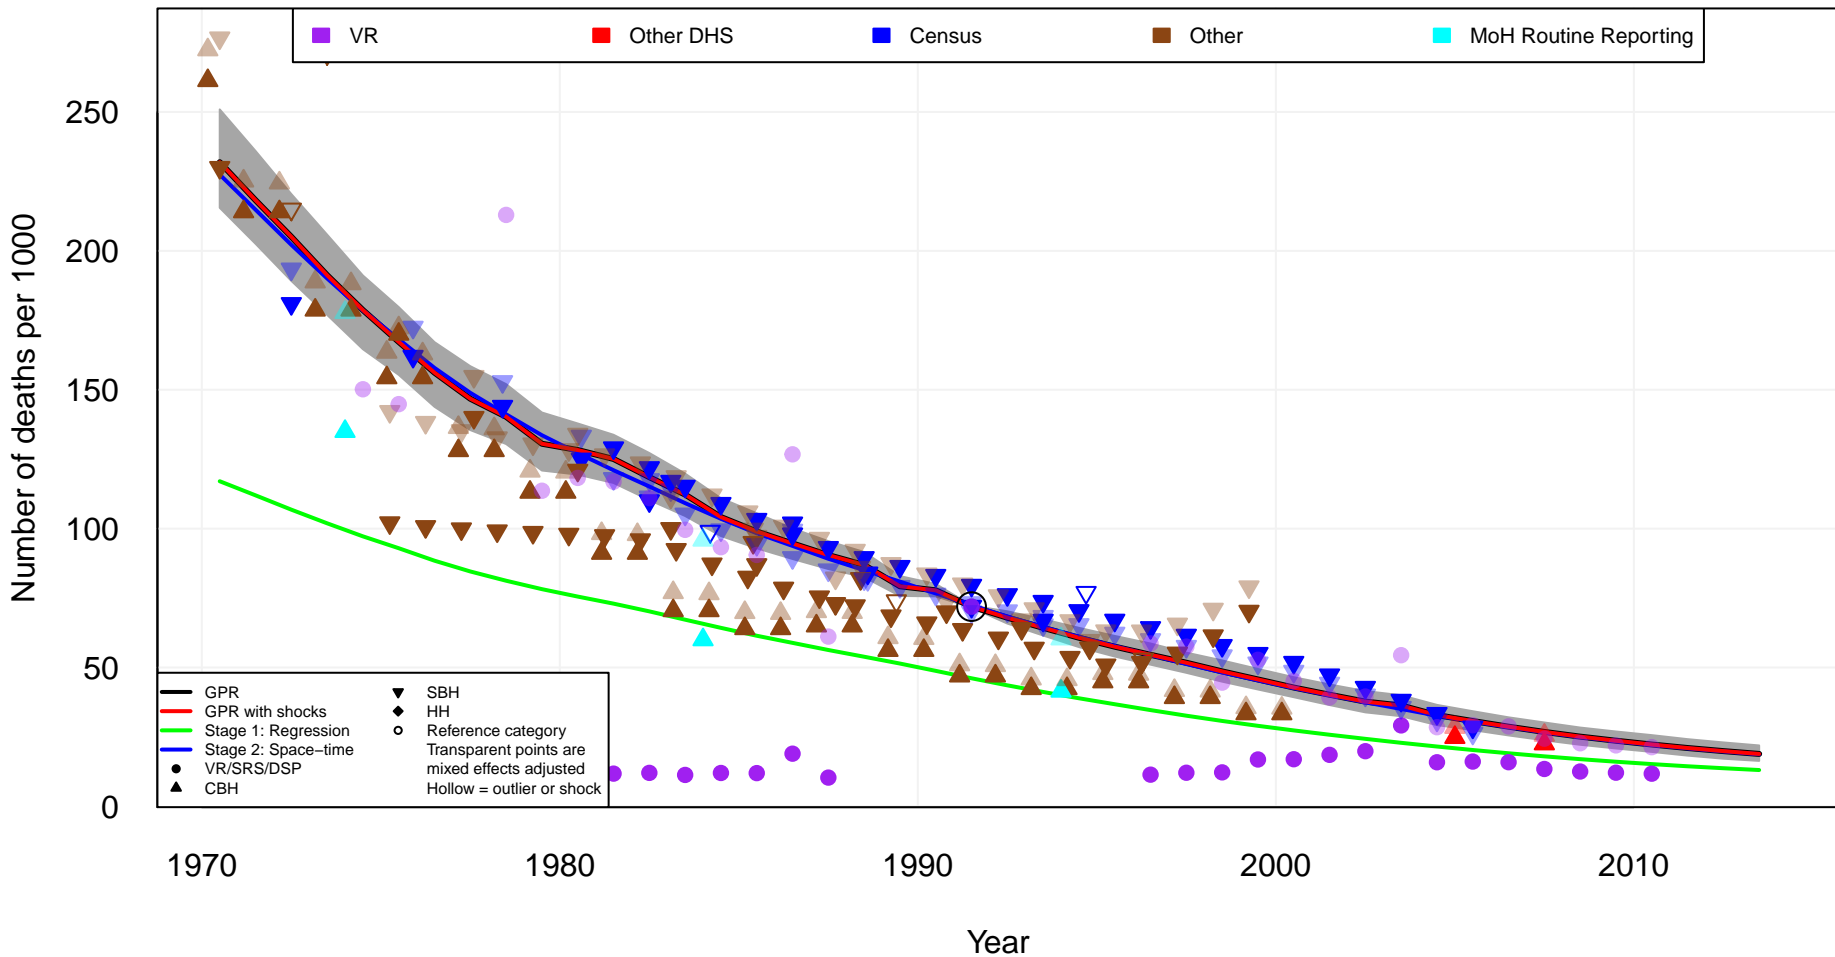



# North Africa/Middle East Iraq (IRQ)

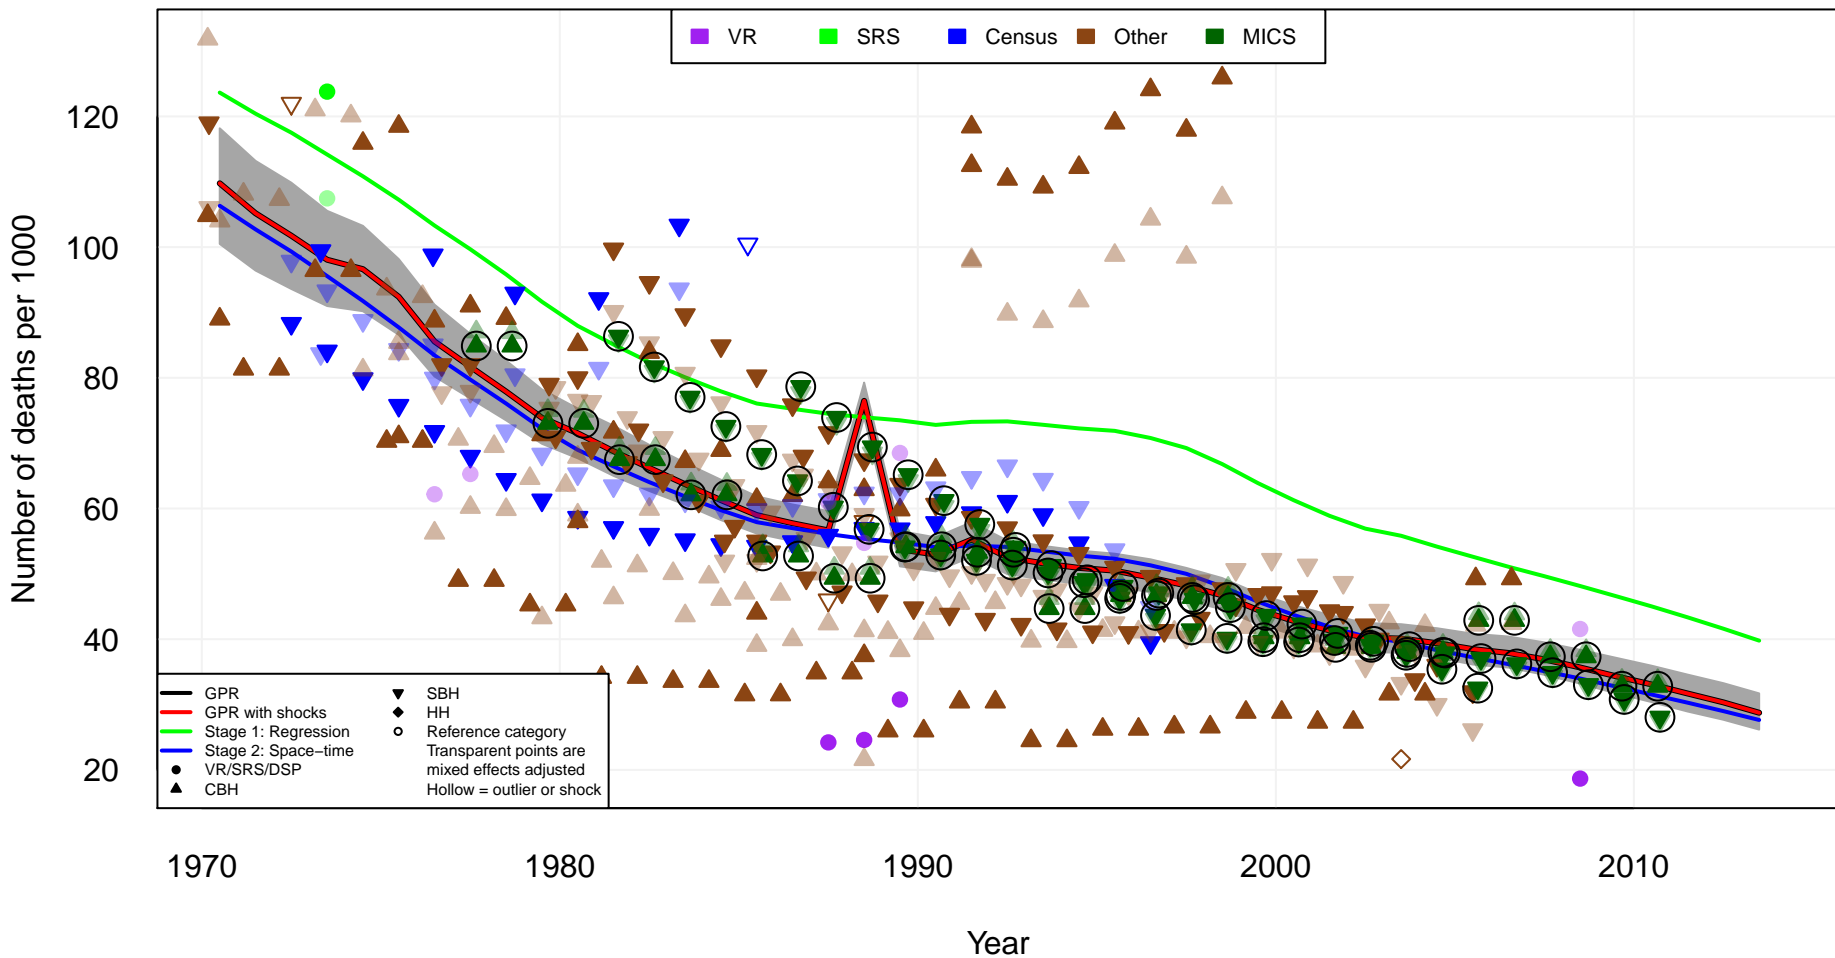

# North Africa/Middle East Jordan (JOR)

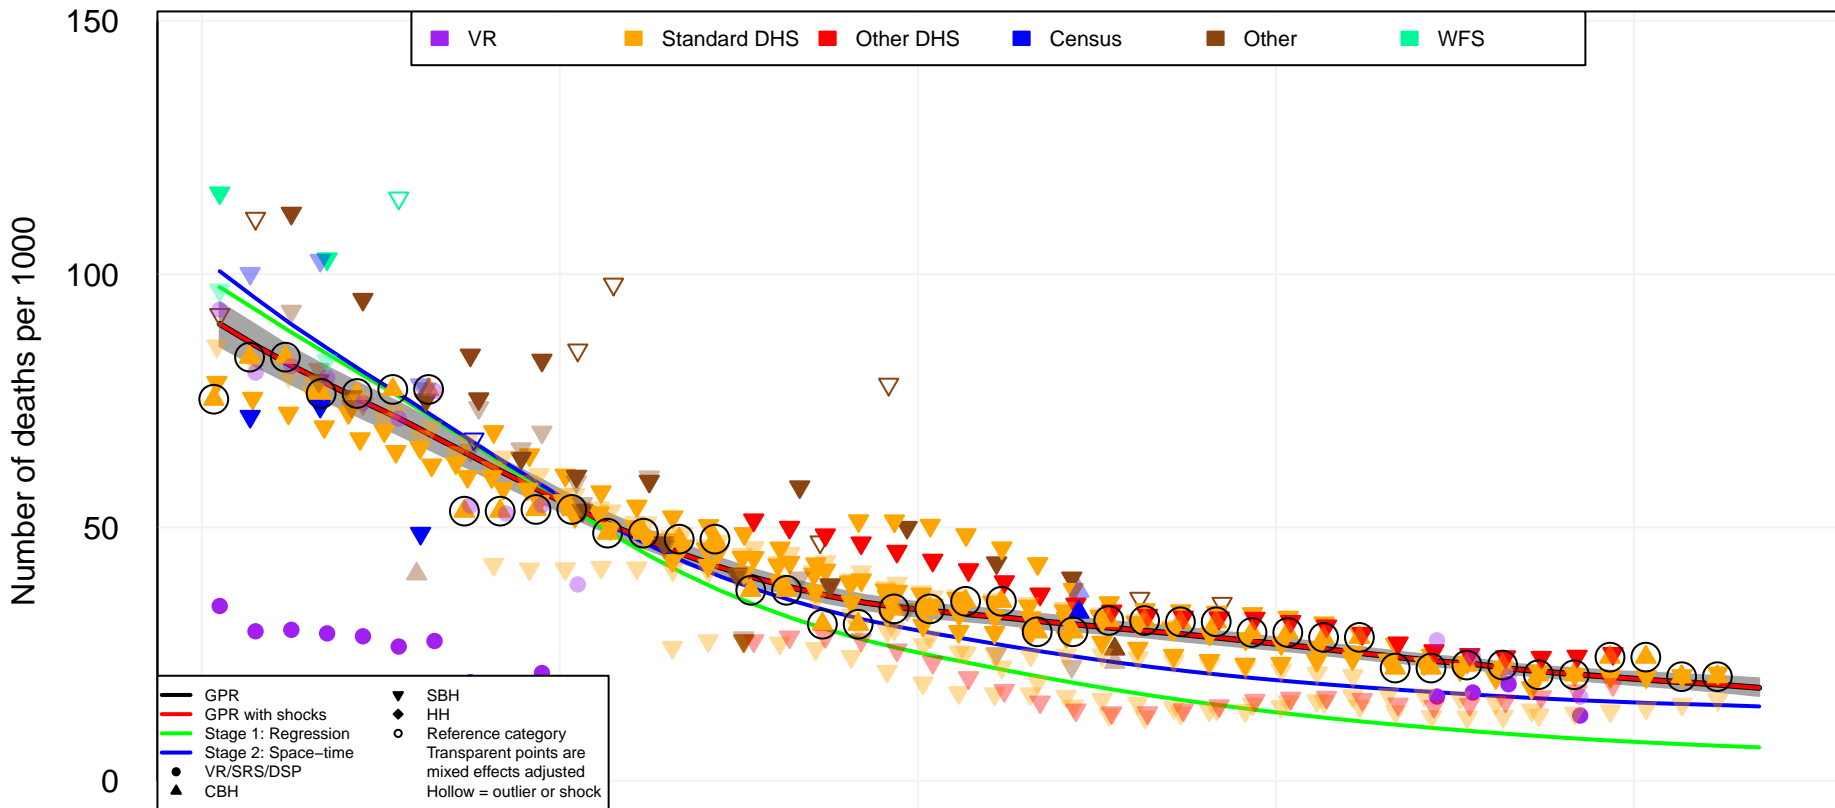

1970

1980

1990

2000

2010

Year

# North Africa/Middle East Kuwait (KWT)

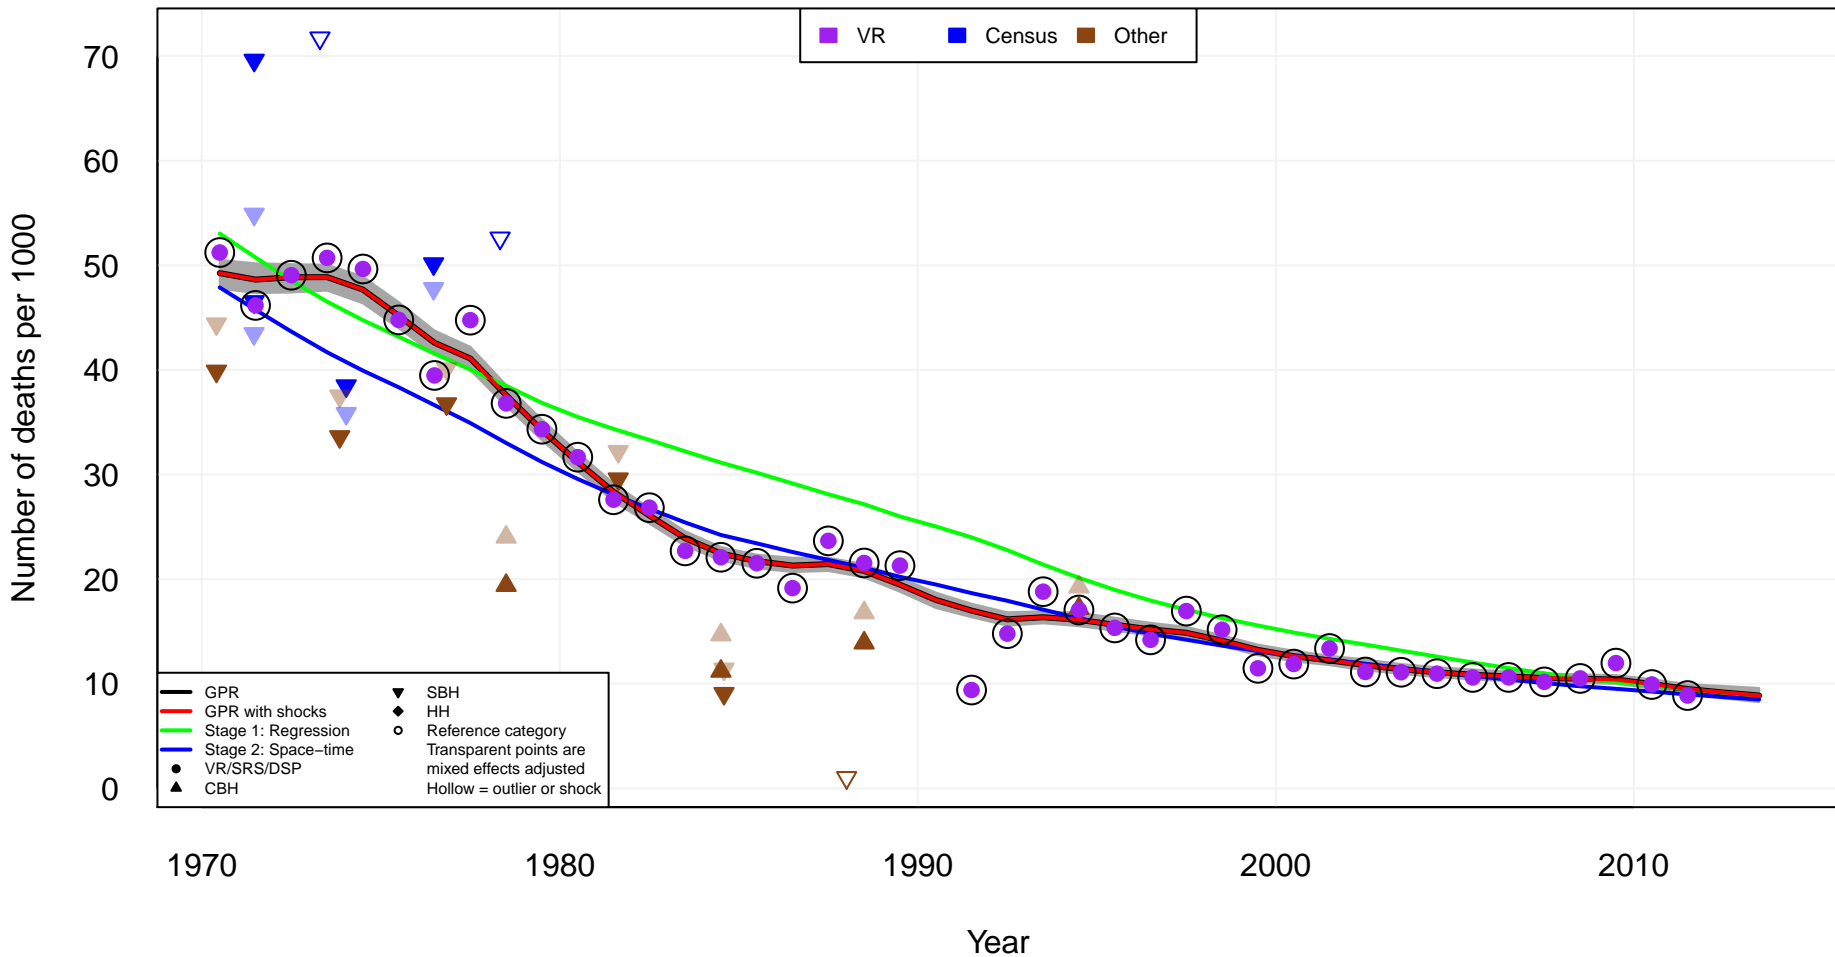

# North Africa/Middle East Lebanon (LBN)

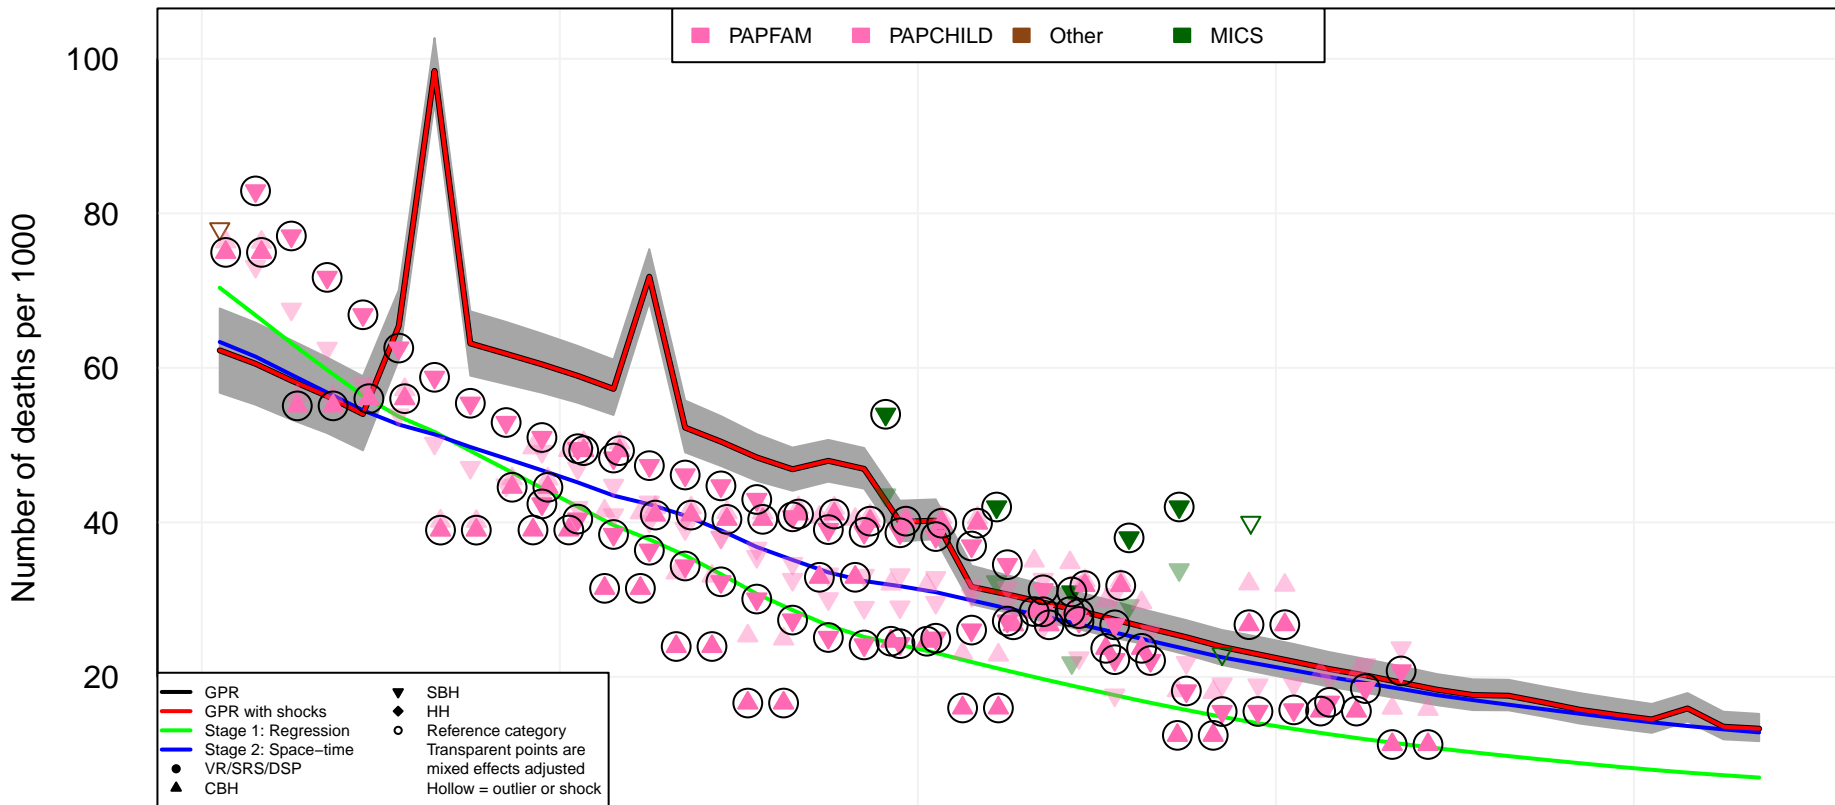

1970

1980

1990

2000

2010

Year

# North Africa/Middle East Libya (LBY)

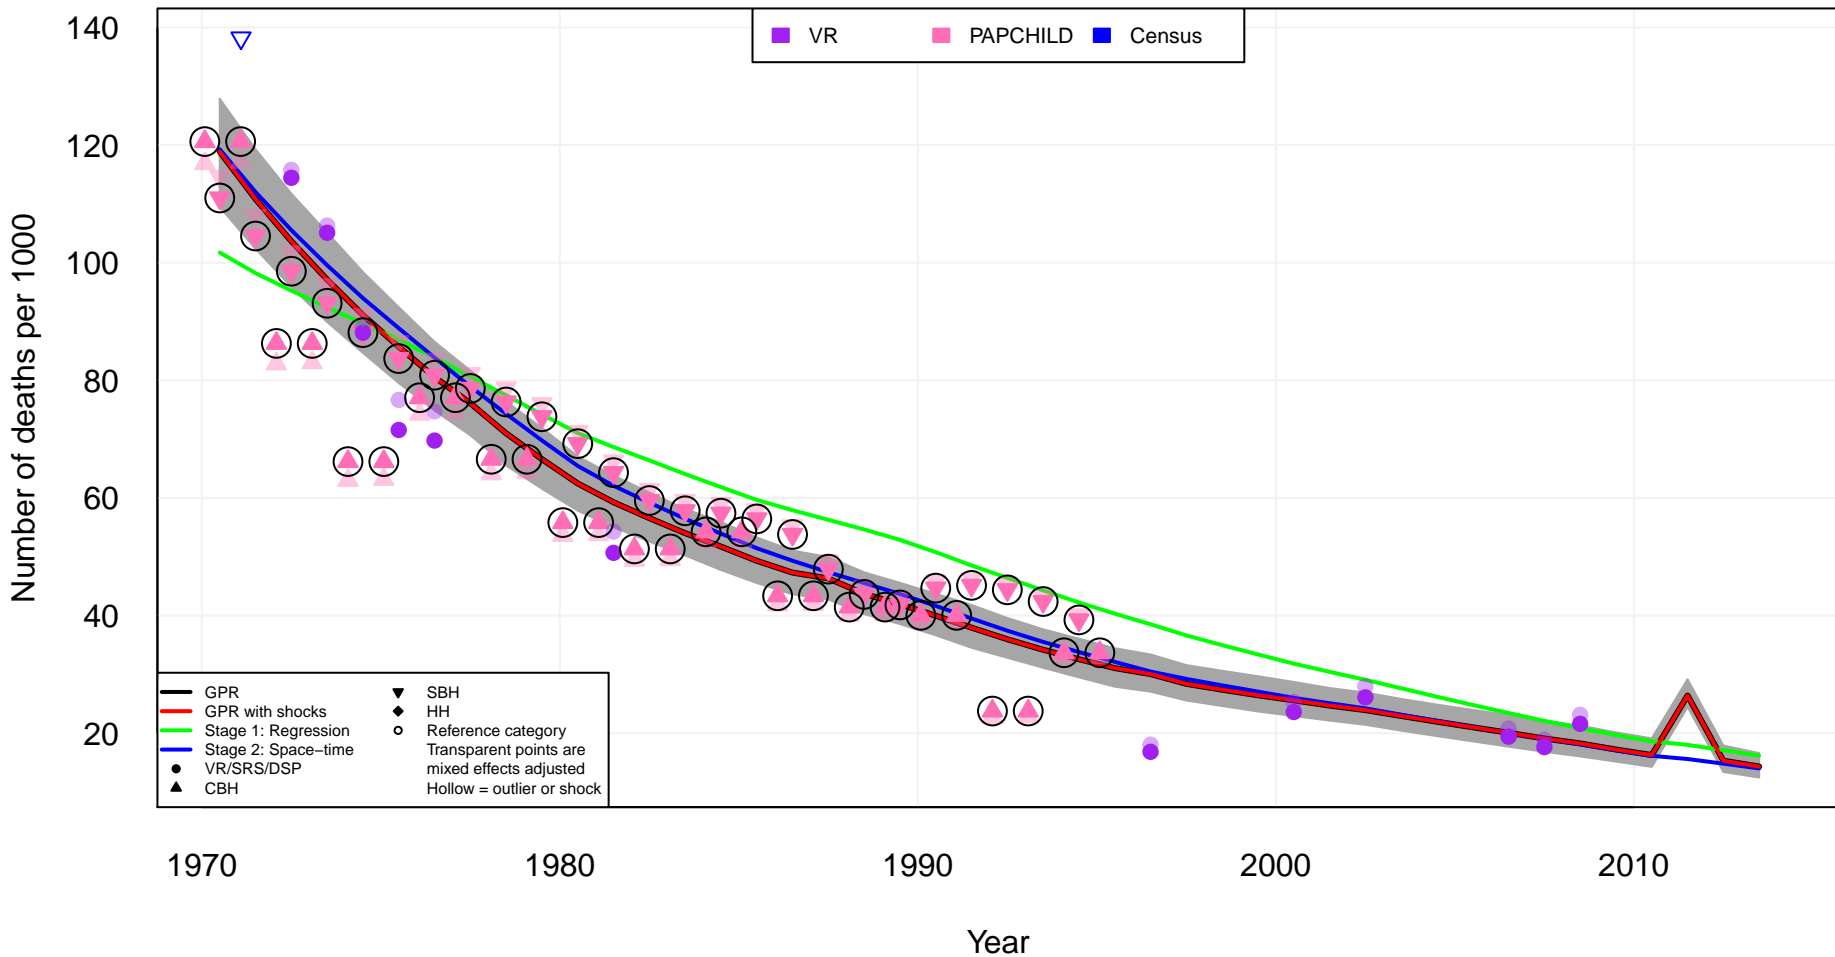

# North Africa/Middle East Morocco (MAR)

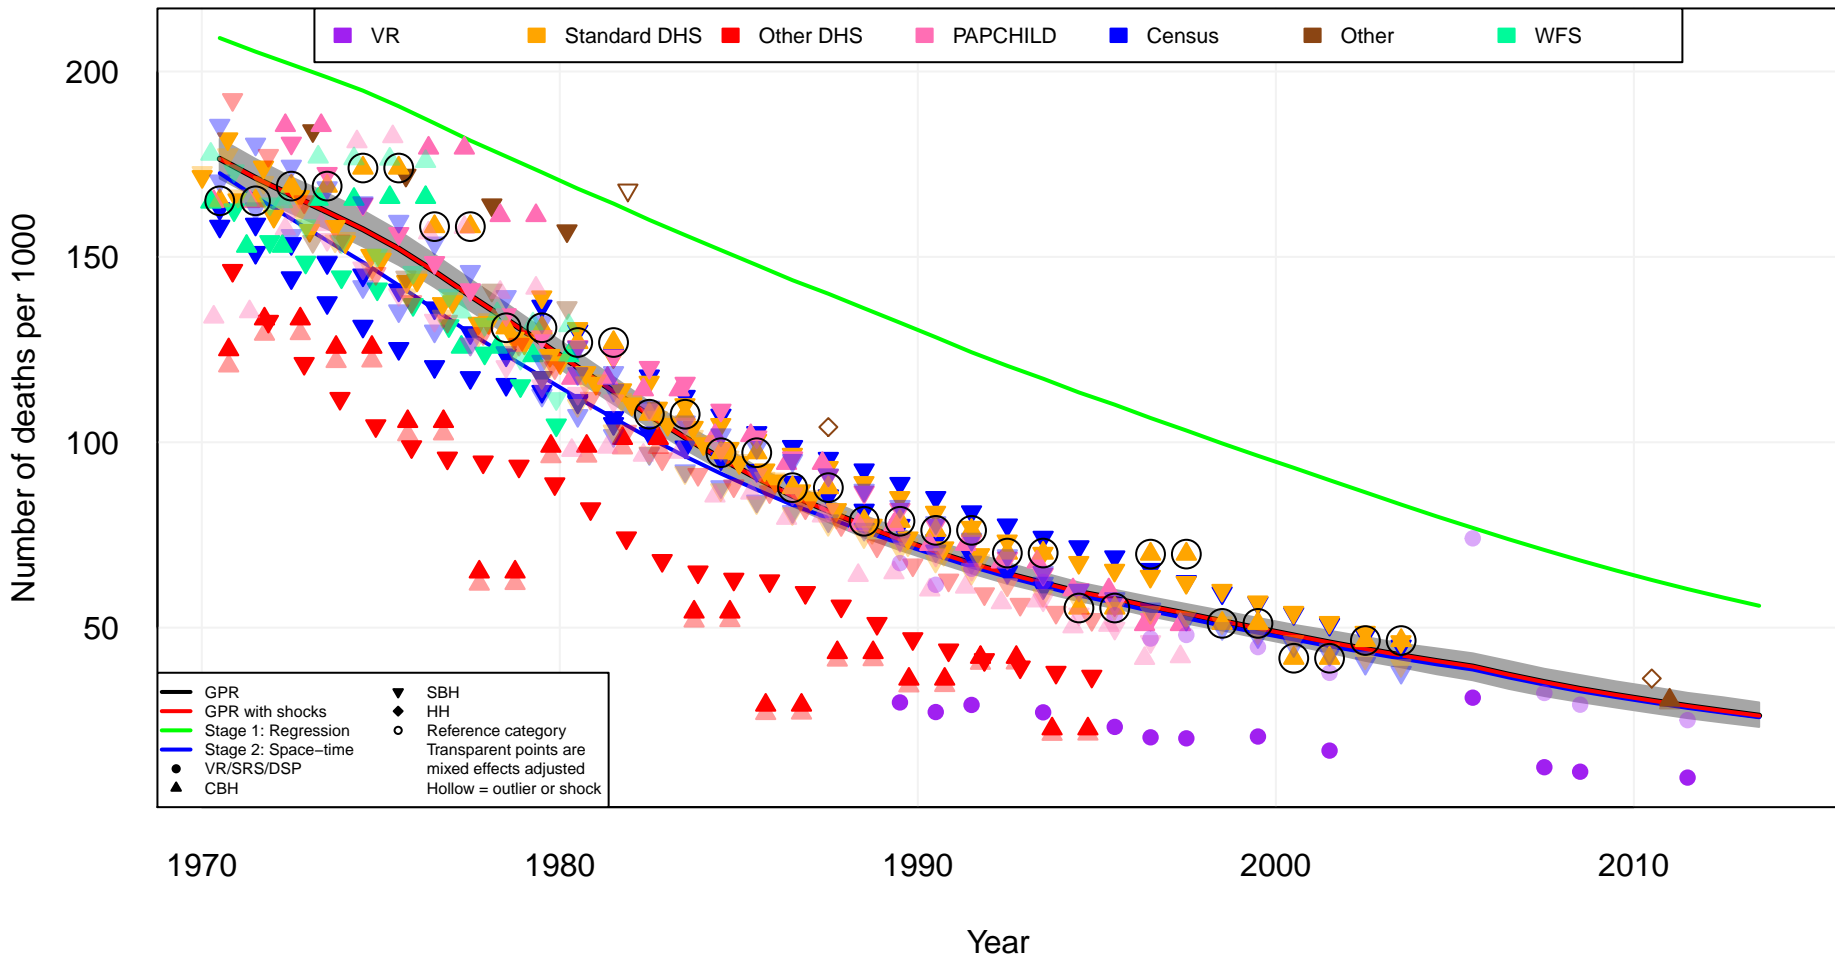

# North Africa/Middle East Oman (OMN)

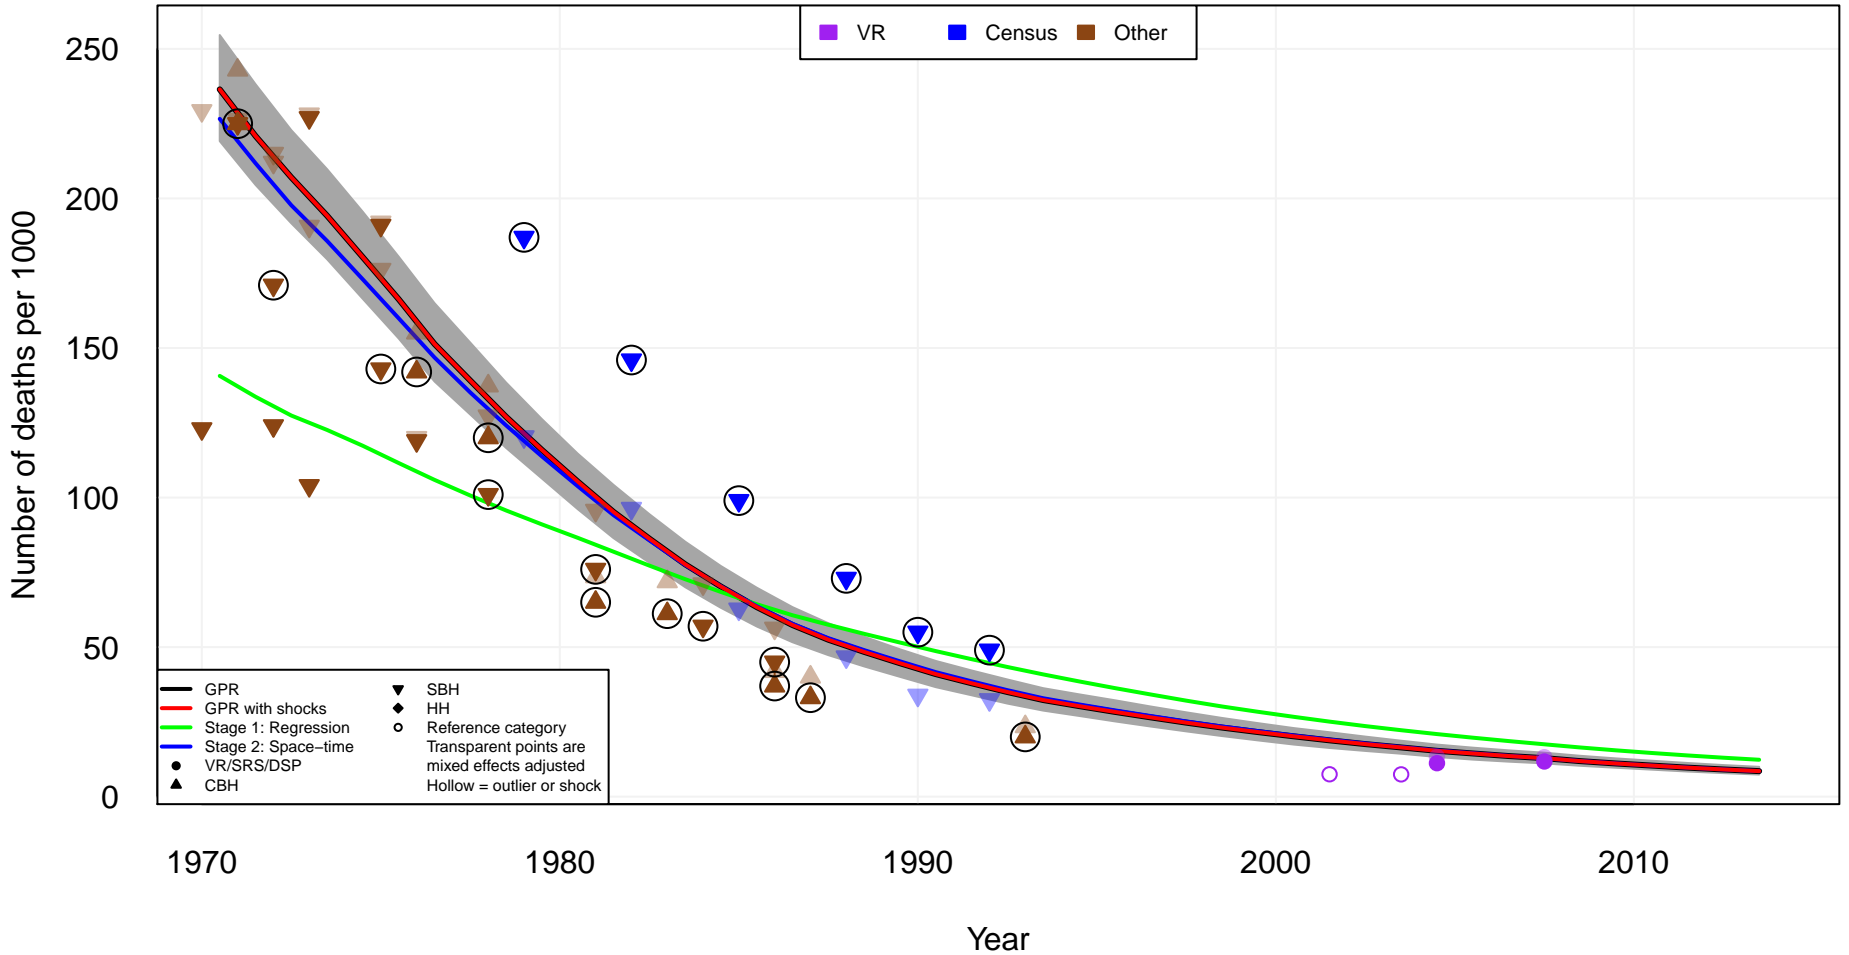

# North Africa/Middle East Palestine (PSE)

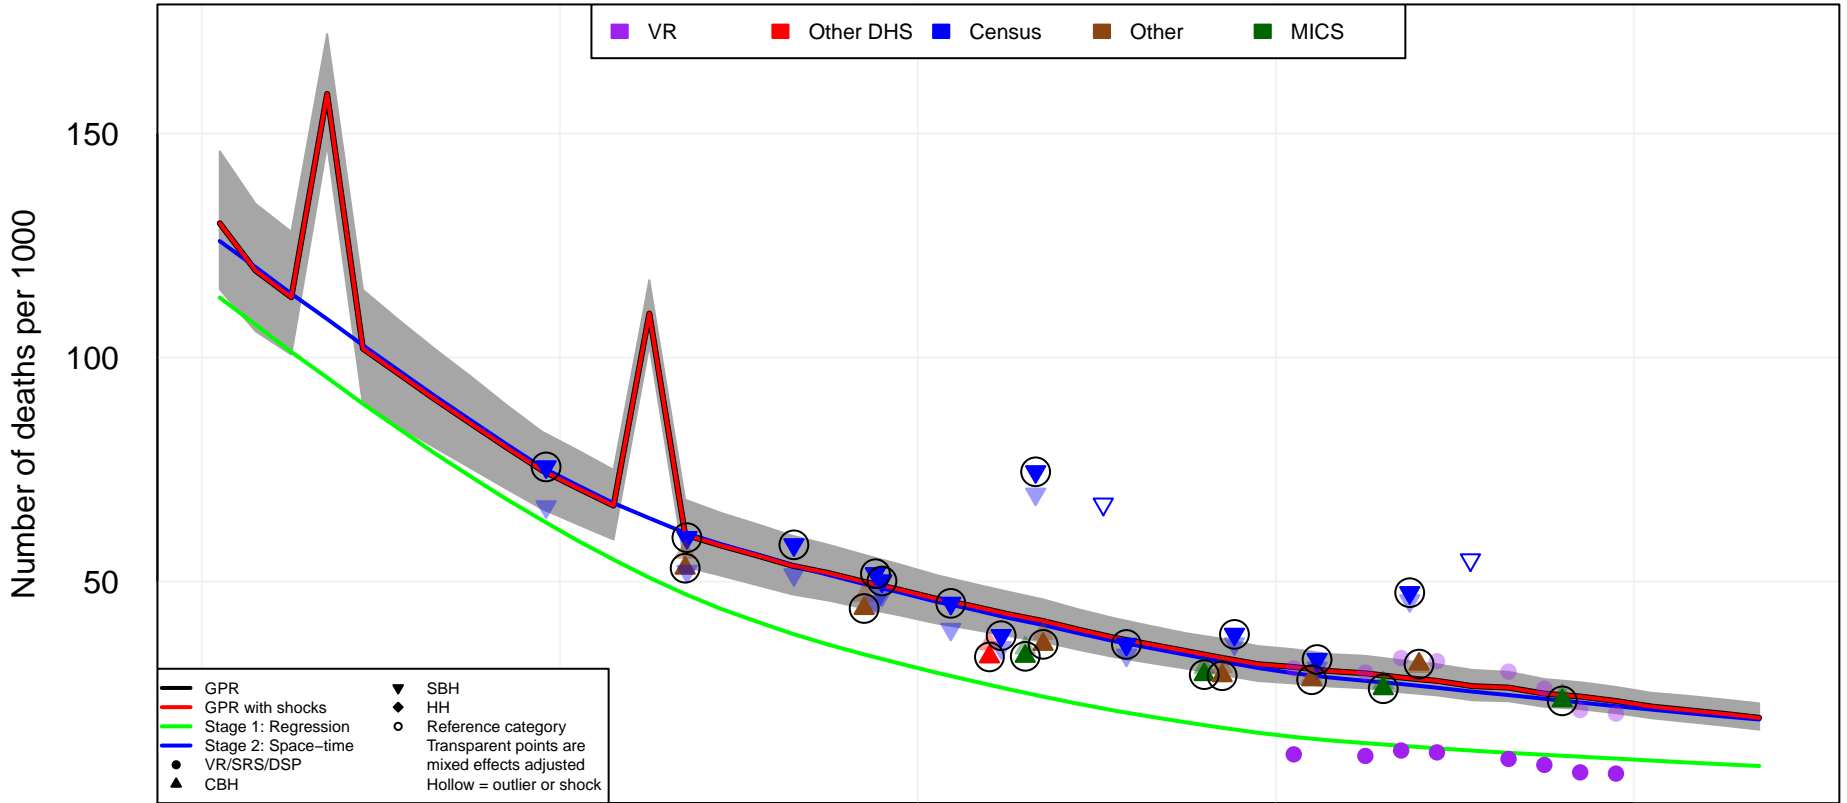

1970

1980

1990

2000

2010

Year



# North Africa/Middle East Qatar (QAT)

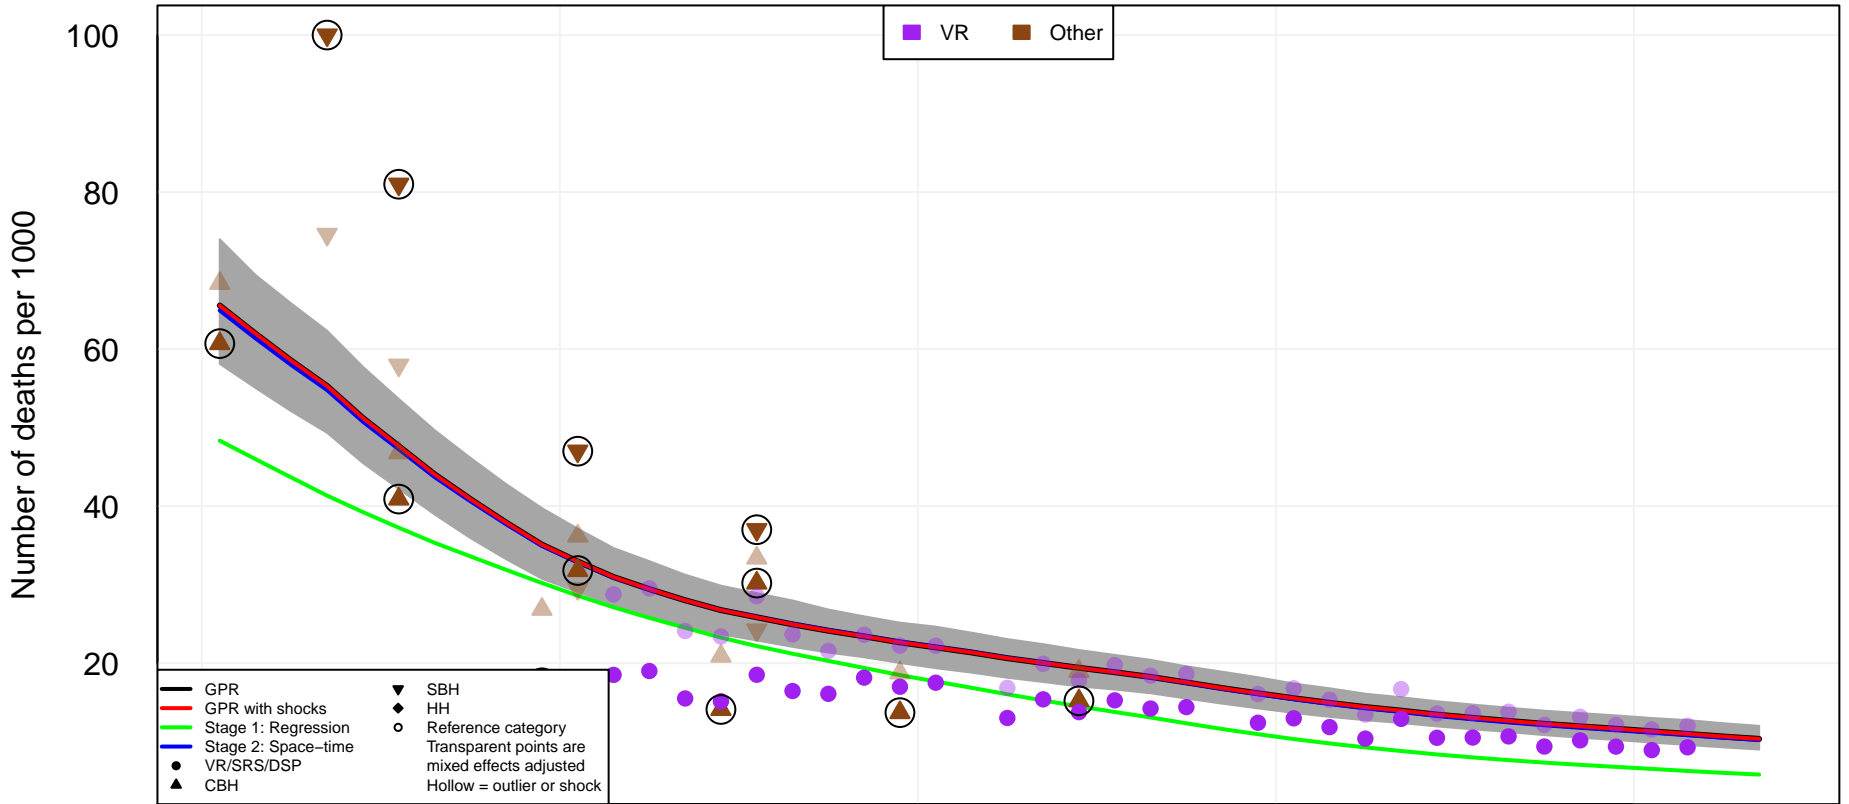

1970

1980

1990

2000

2010

Year

- GPR
- GPR with shocks
- Stage 1: Regression
- Stage 2: Space-time
- VR/SRS/DSP
- ▲ CBH
- ▼ SBH
- ◆ HH
- Reference category
- Transparent points are mixed effects adjusted
- Hollow = outlier or shock

- VR
- Other

# North Africa/Middle East Saudi Arabia (SAU)

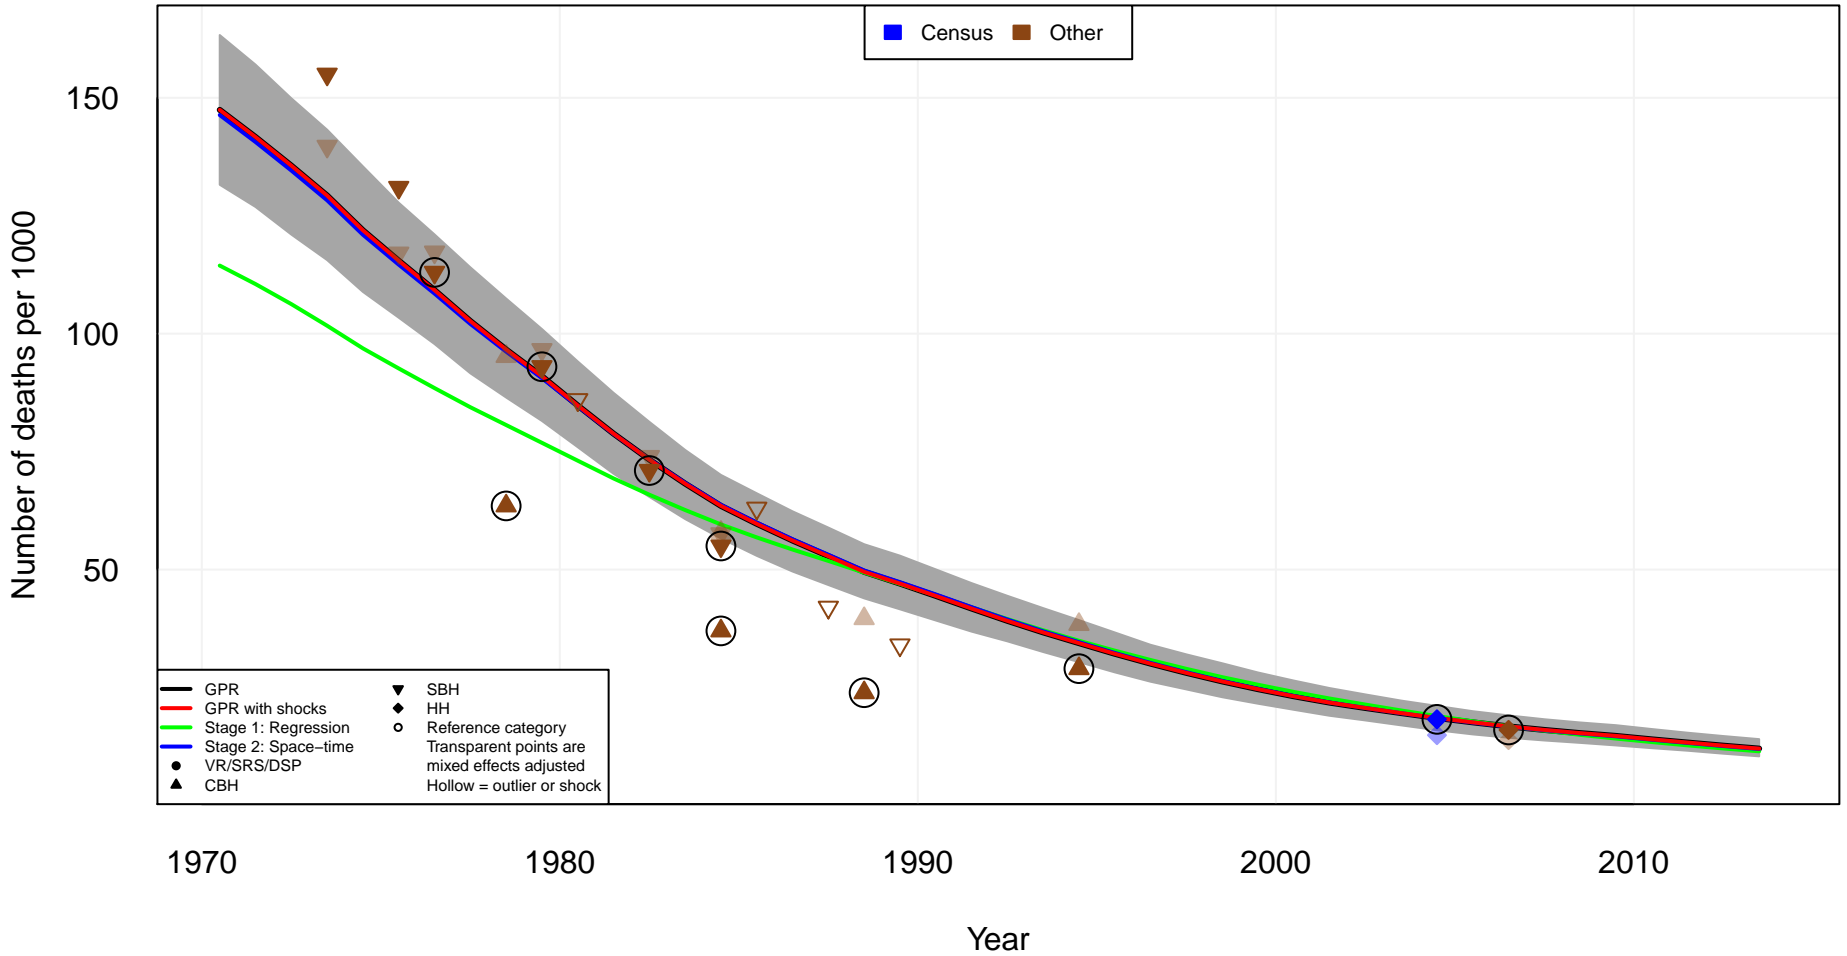

# North Africa/Middle East Sudan (SDN)

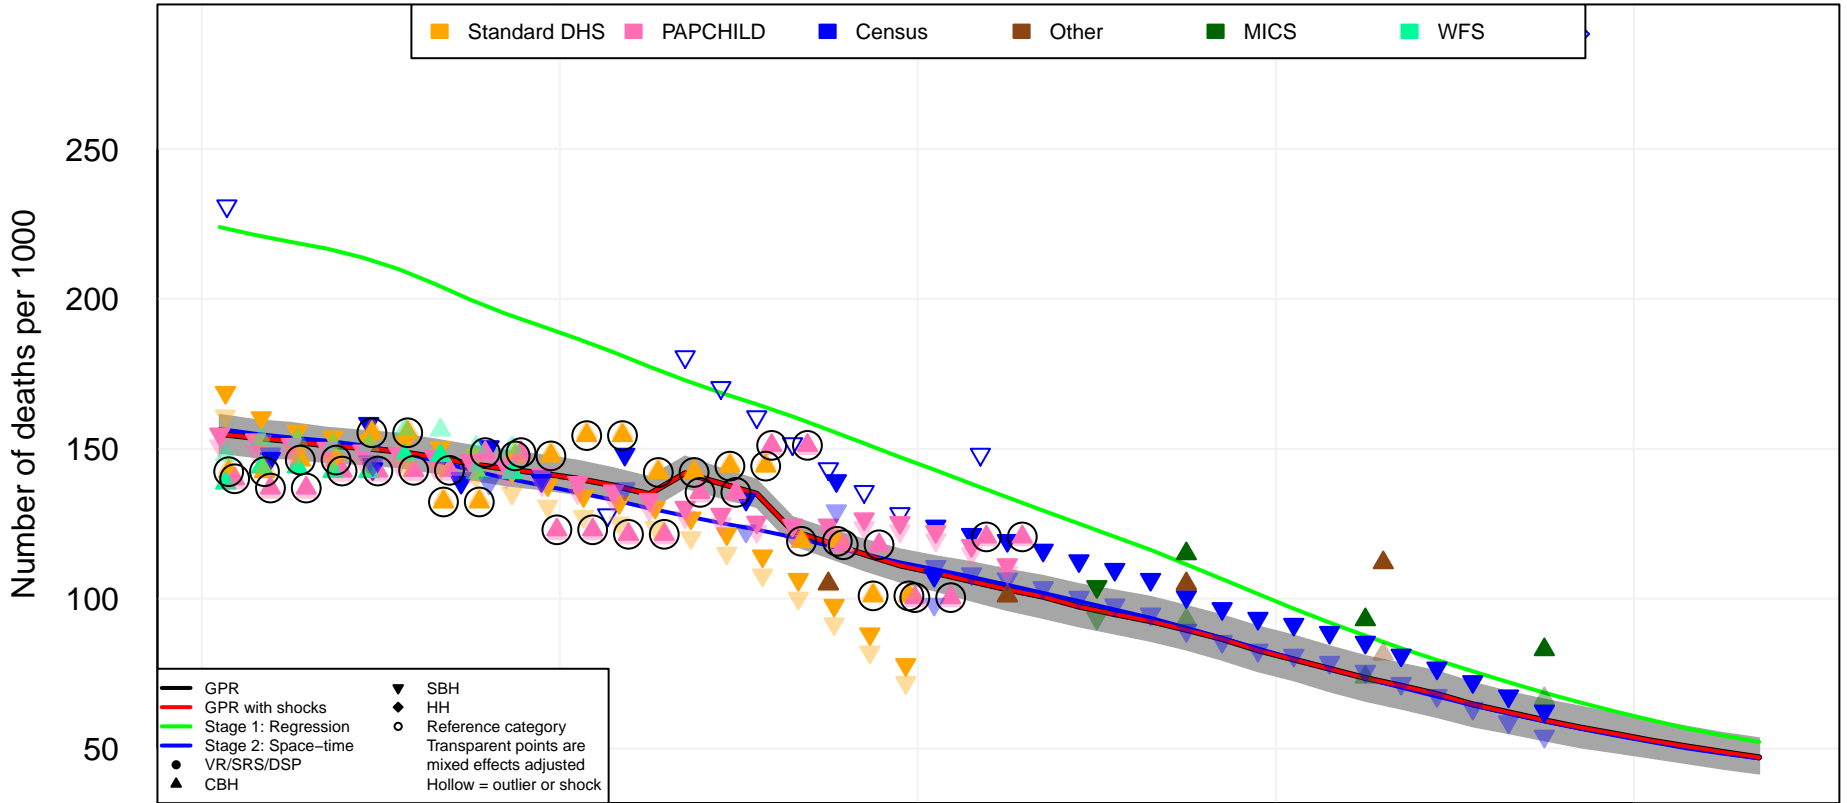

1970

1980

1990

2000

2010

Year

- GPR
  - GPR with shocks
  - Stage 1: Regression
  - Stage 2: Space-time
  - VR/SRS/DSP
  - ▲ CBH
  - ▼ SBH
  - ◆ HH
  - Reference category
- Transparent points are mixed effects adjusted  
Hollow = outlier or shock

- Standard DHS
- PAPCHILD
- Census
- Other
- MICS
- WFS

# North Africa/Middle East Syria (SYR)

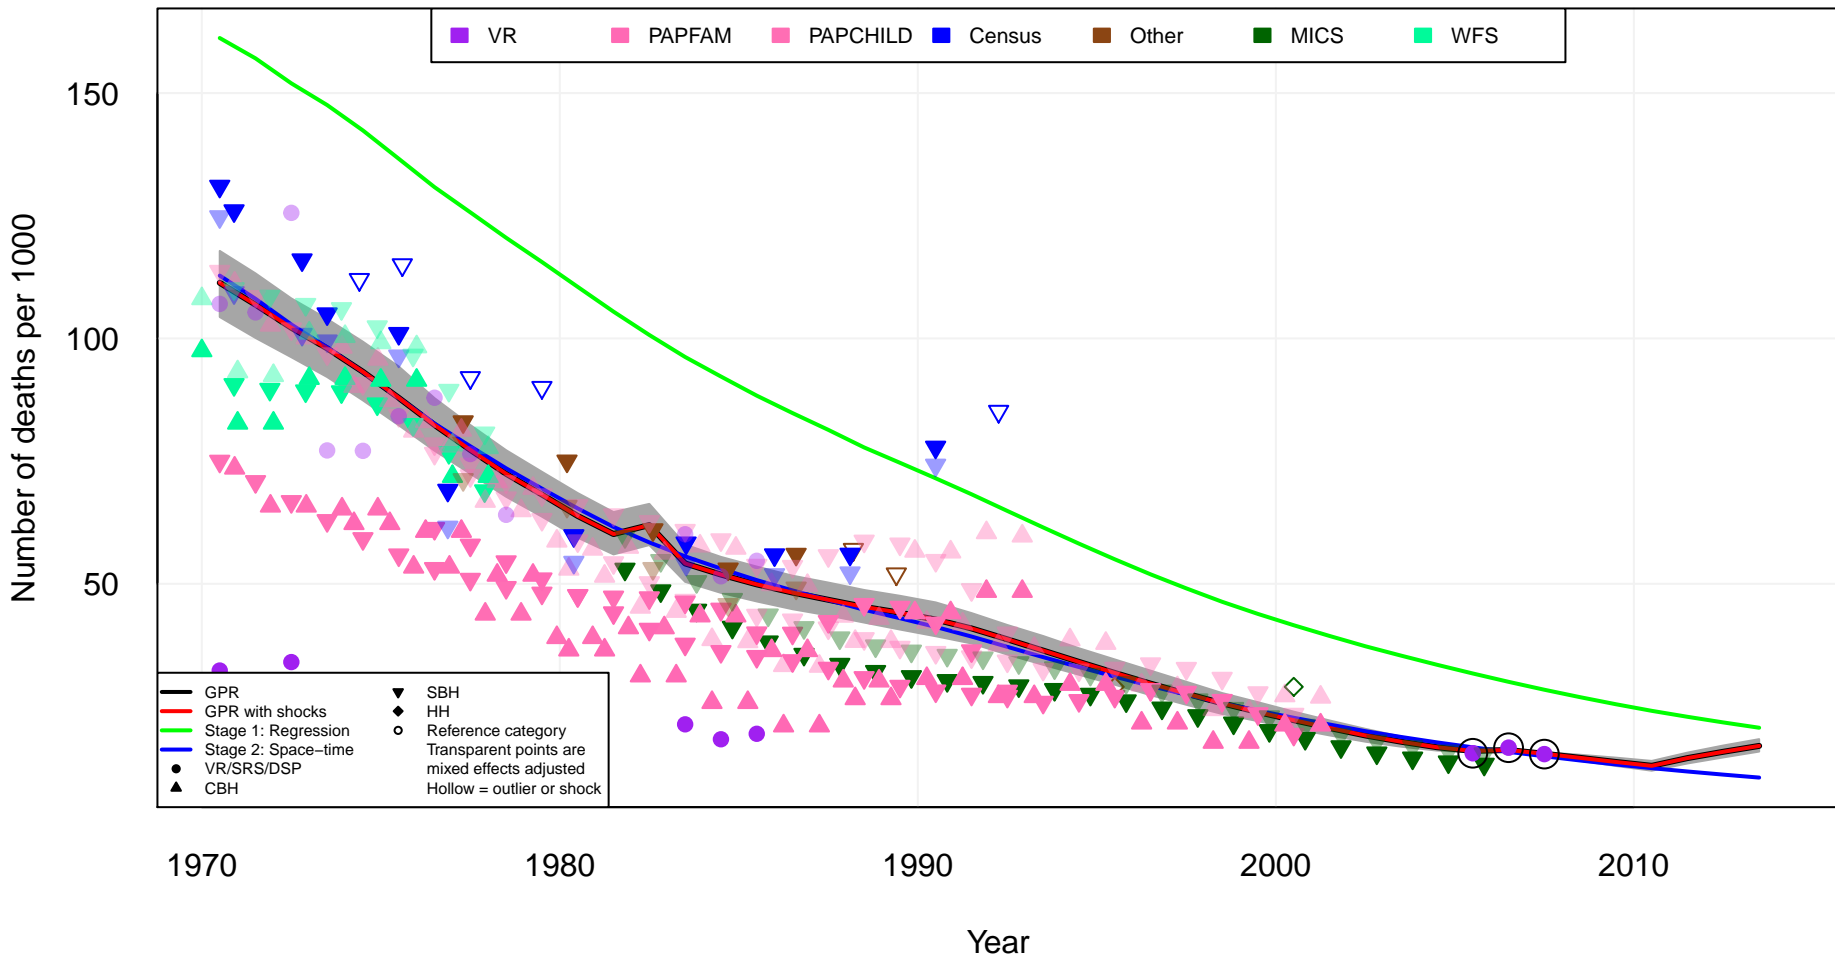

# North Africa/Middle East Tunisia (TUN)

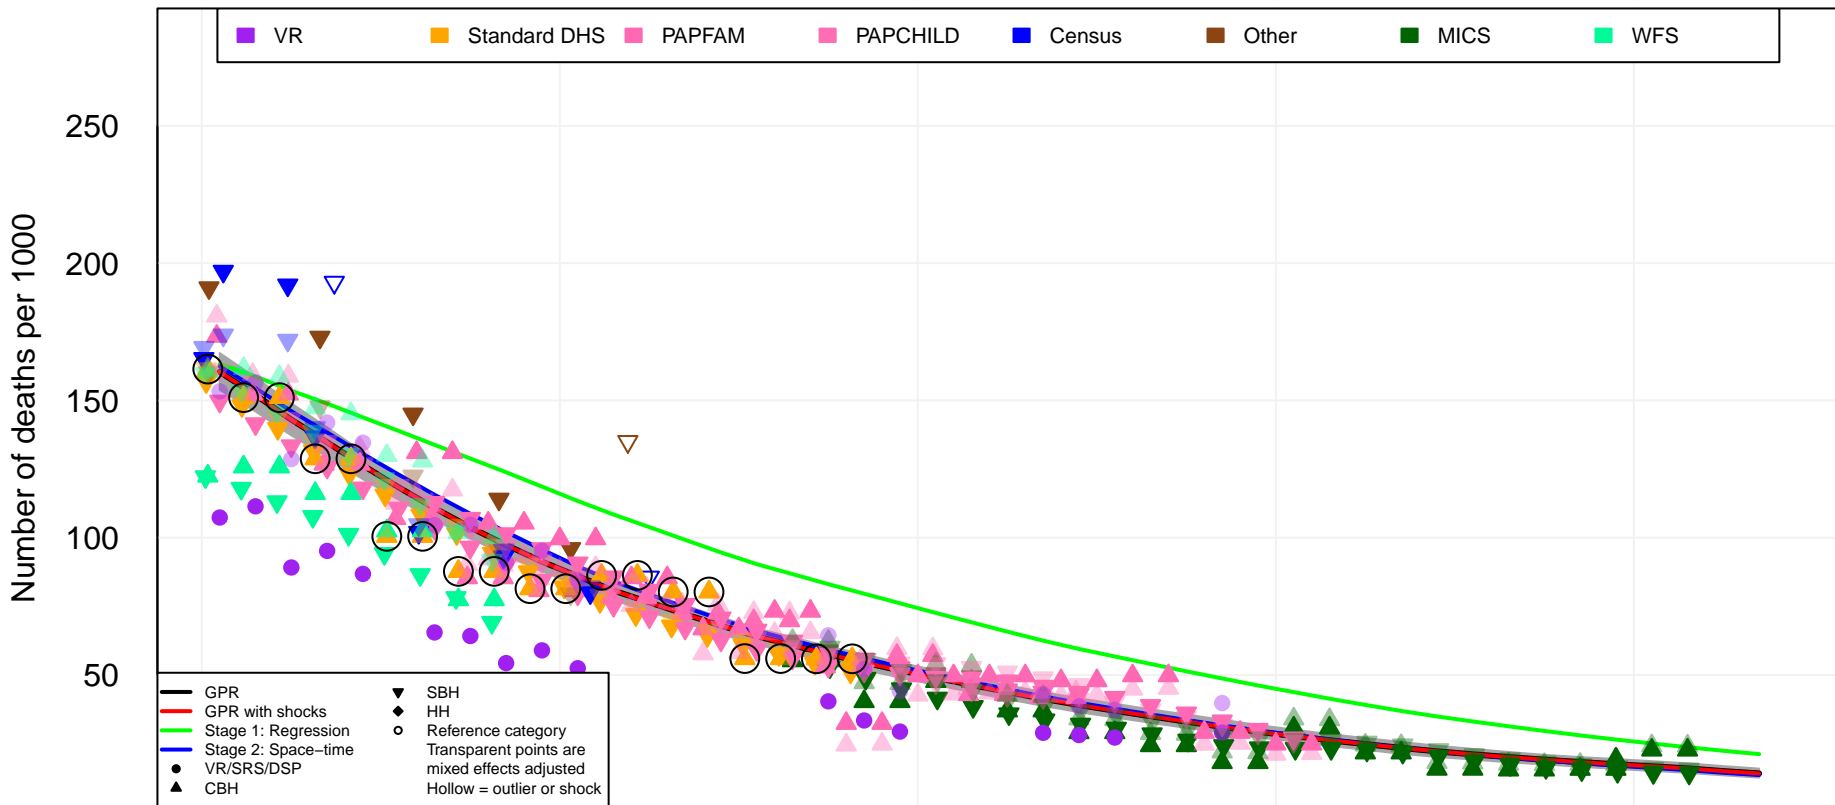

1970

1980

1990

2000

2010

Year

# North Africa/Middle East Turkey (TUR)

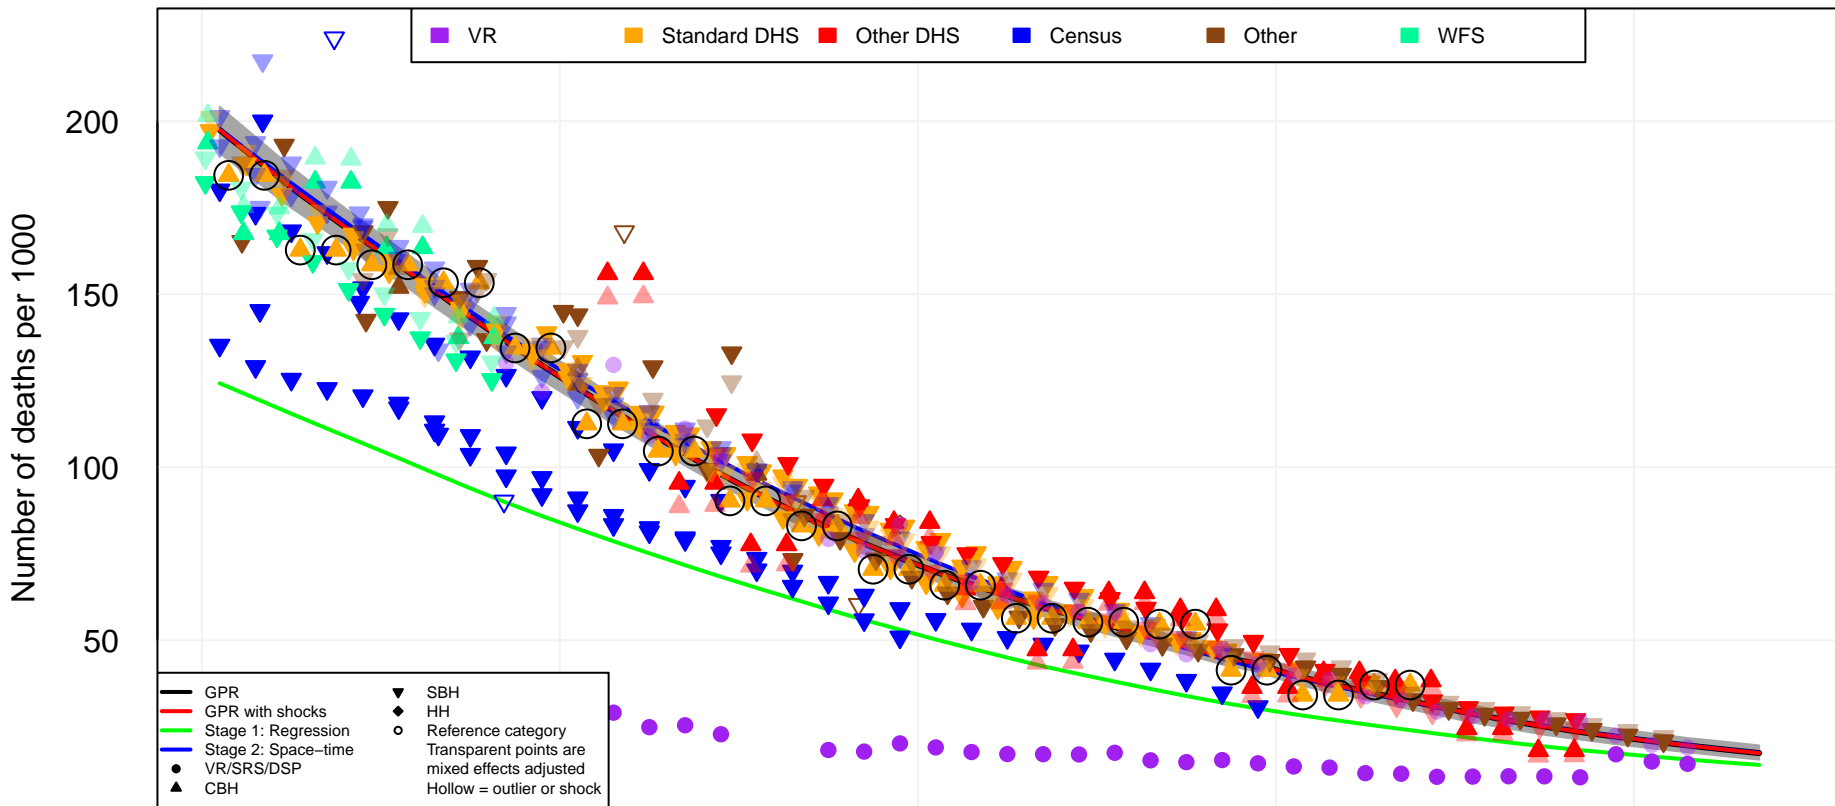

1970

1980

1990

2000

2010

Year

# North Africa/Middle East Yemen (YEM)

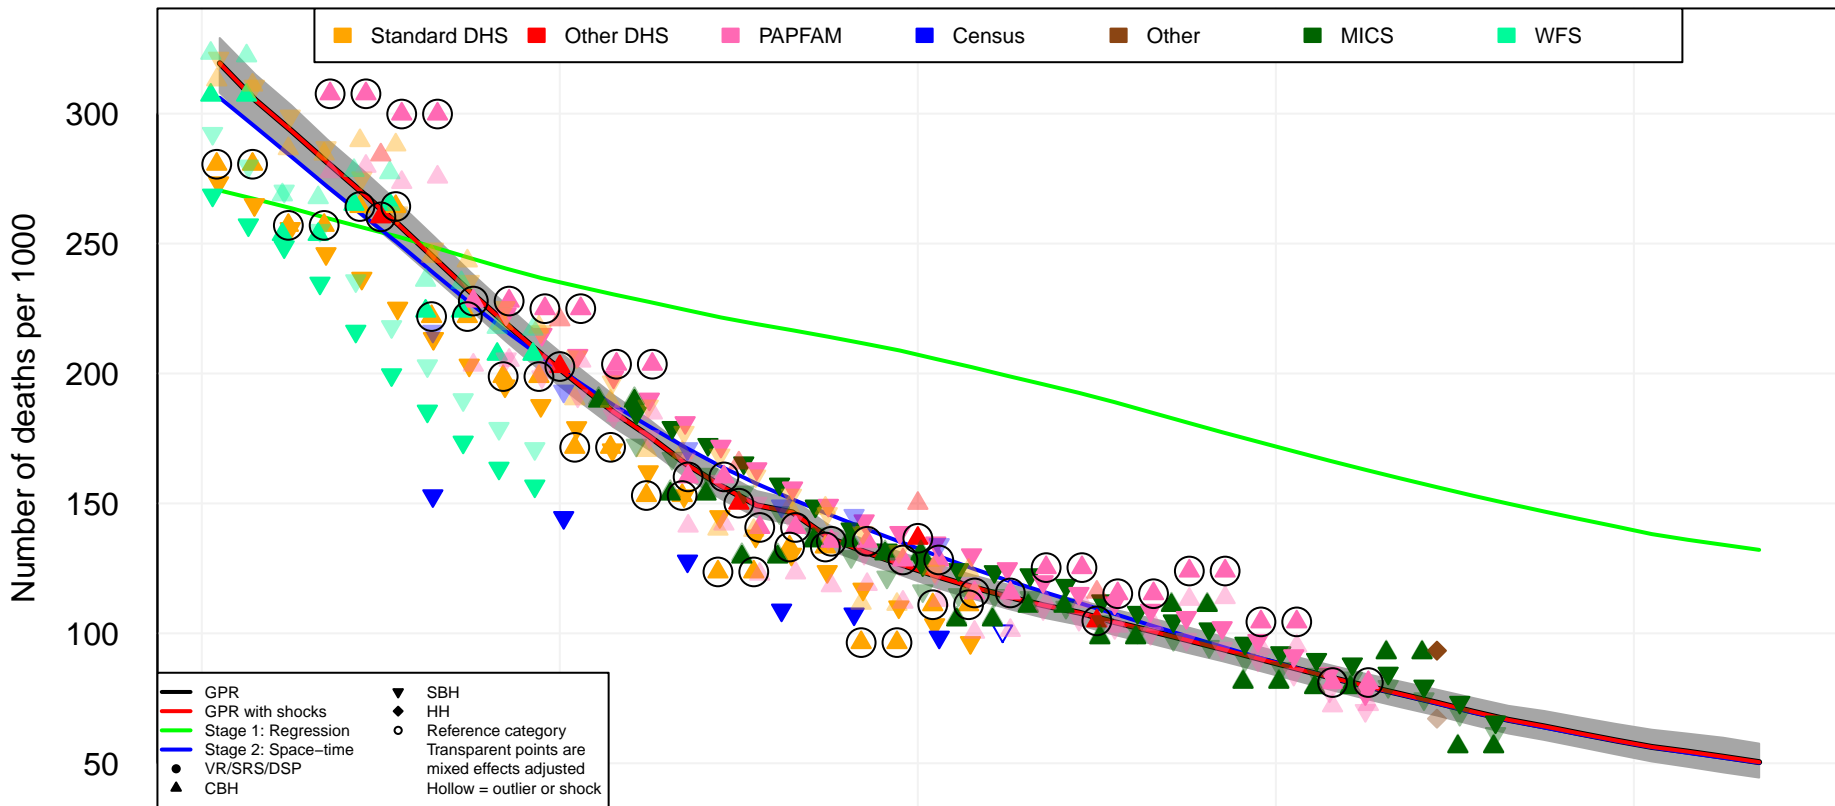

# North America, High-income Canada (CAN)

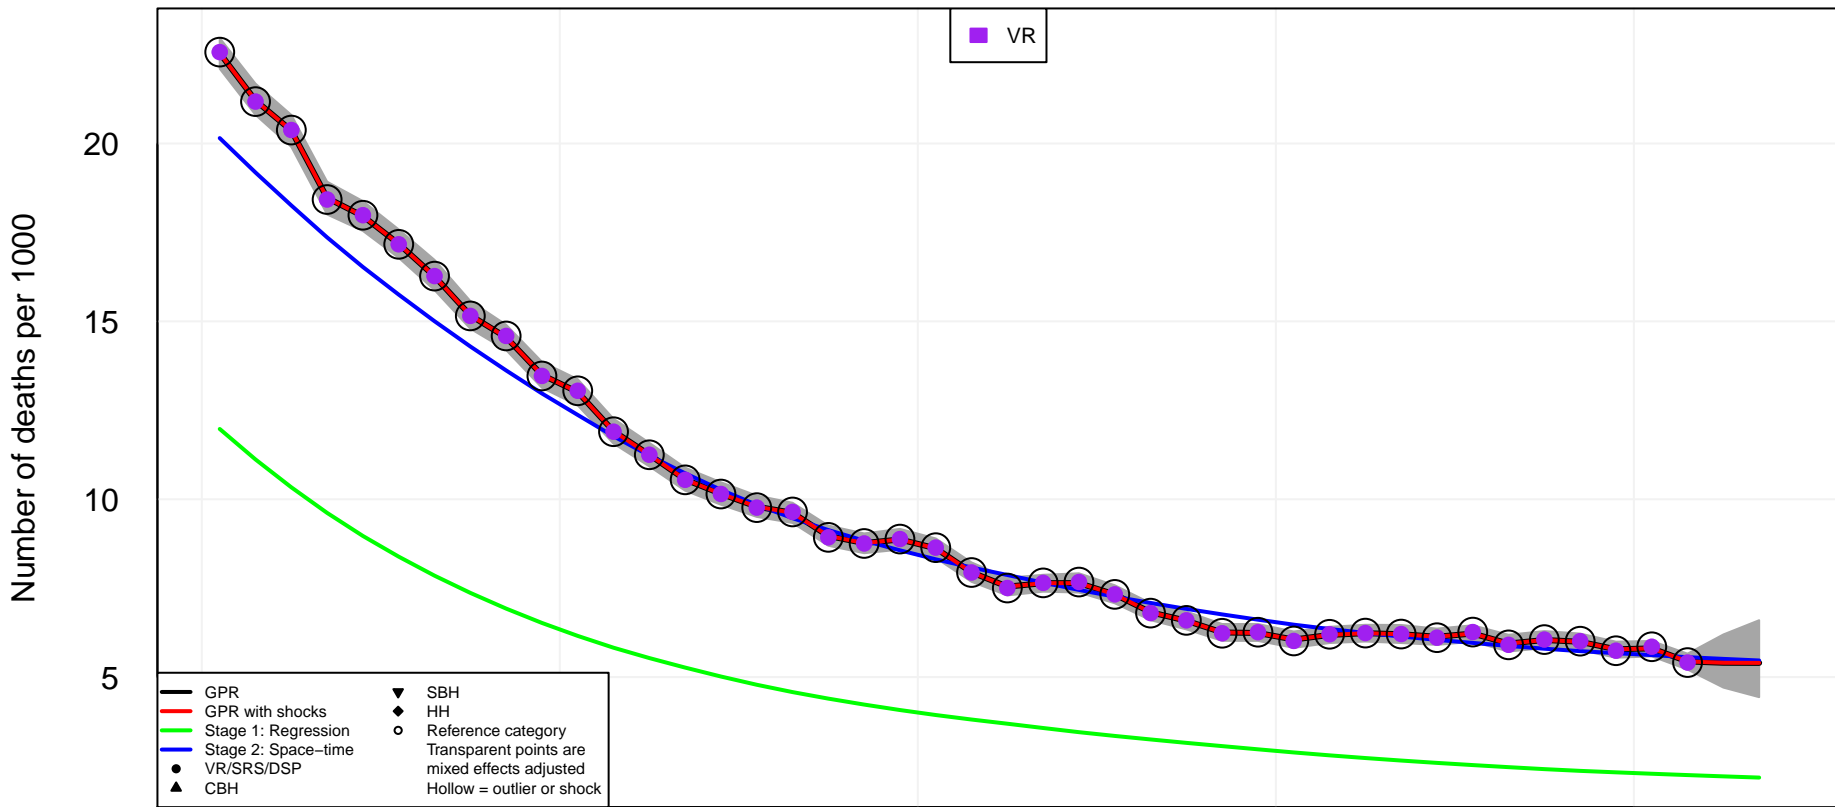

- GPR
- GPR with shocks
- Stage 1: Regression
- Stage 2: Space-time
- VR/SRS/DSP
- ▲ CBH
- ▼ SBH
- ◆ HH
- Reference category
- Transparent points are mixed effects adjusted
- Hollow = outlier or shock

VR

1970

1980

1990

2000

2010

Year

20

15

10

5

Number of deaths per 1000



# North America, High-income United States (USA)

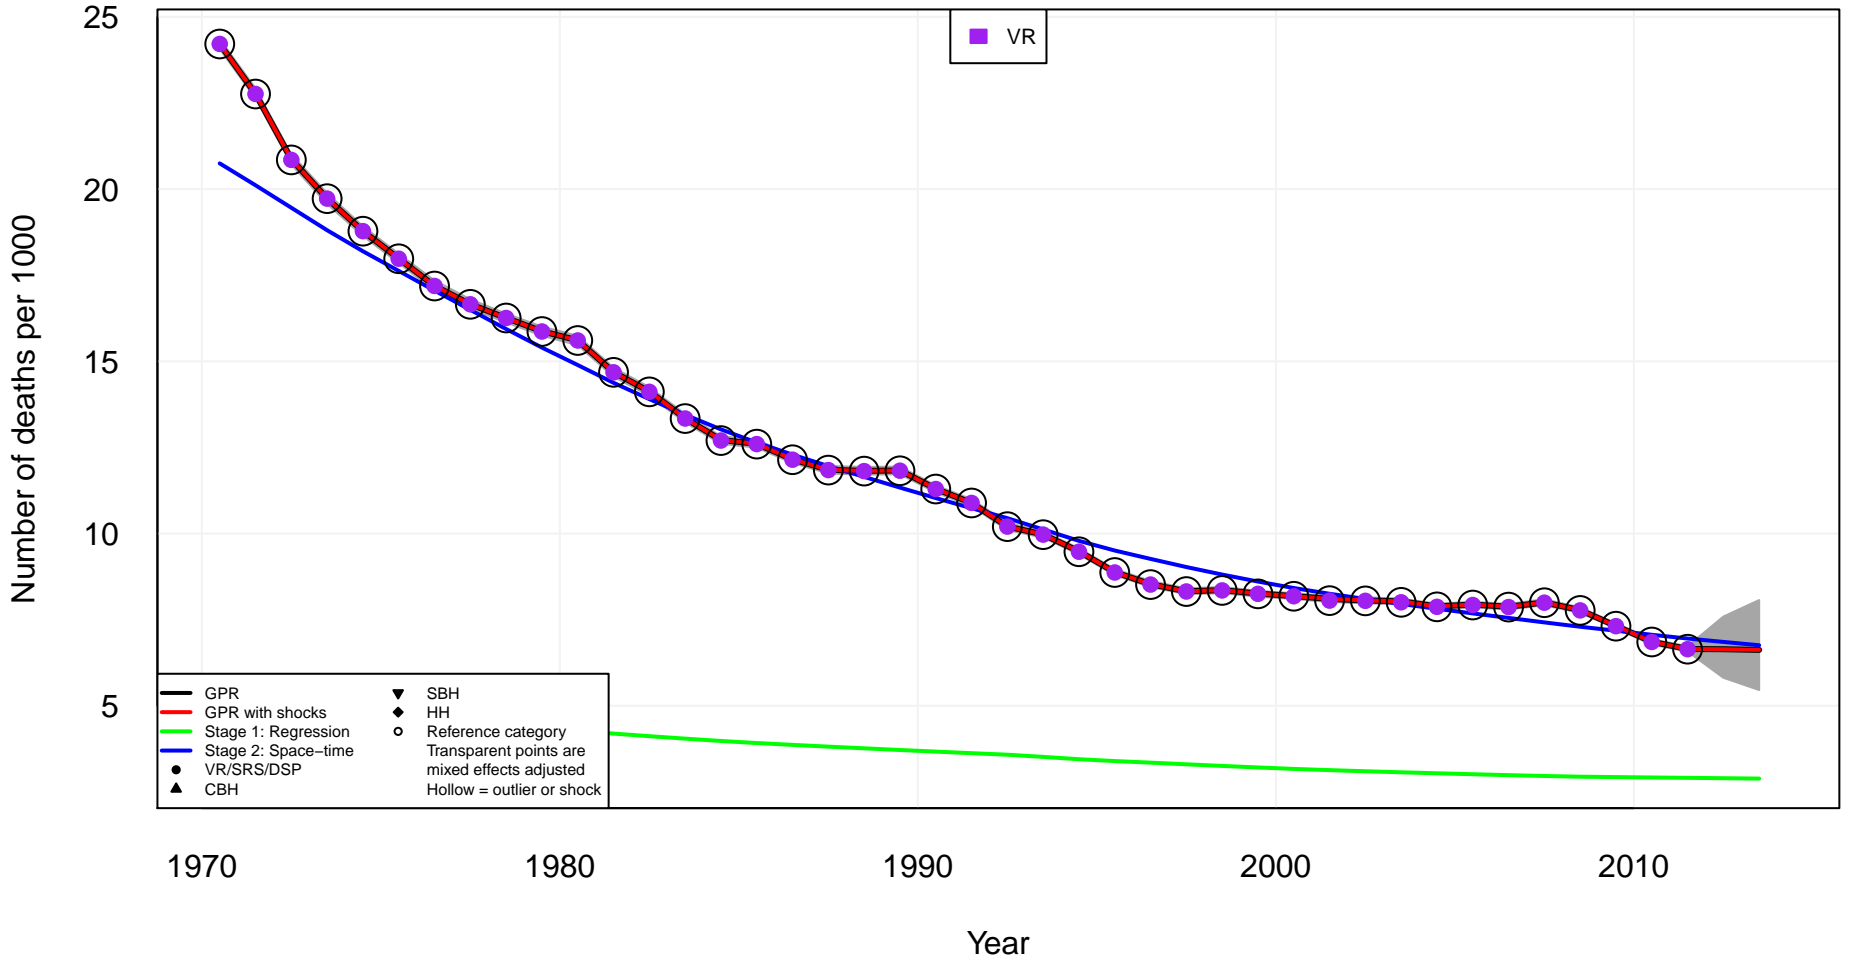

# Oceania Fiji (FJI)

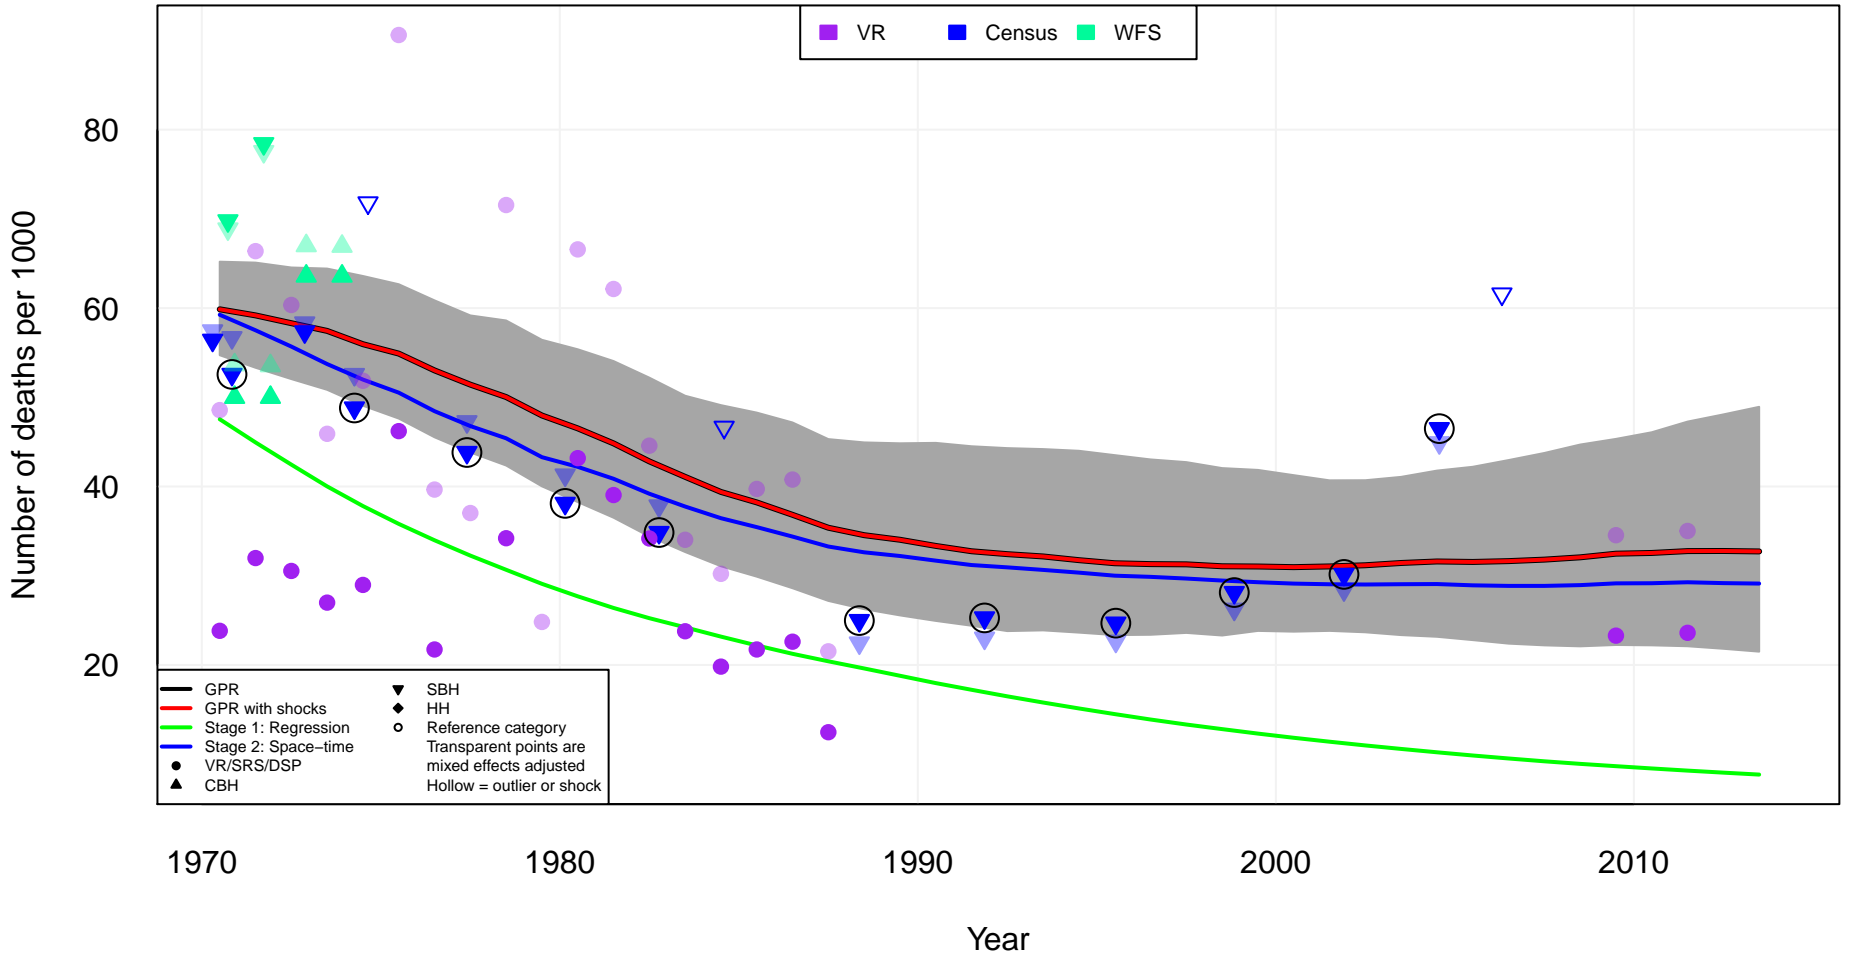

# Oceania Federated States of Micronesia (FSM)

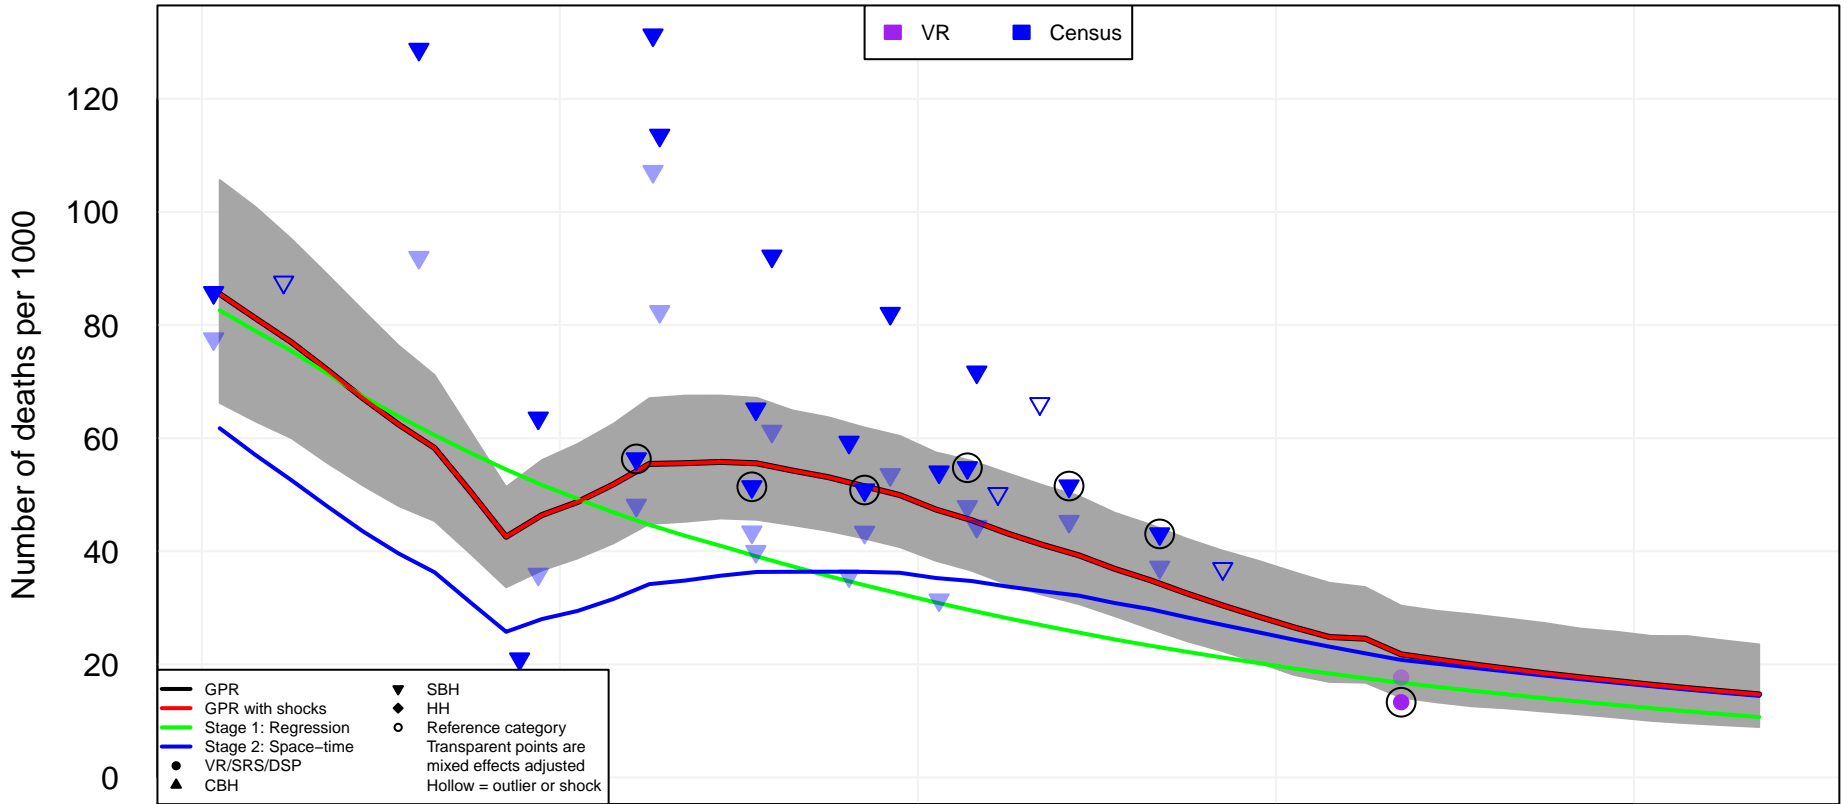

1970

1980

1990

2000

2010

Year

# Oceania Kiribati (KIR)

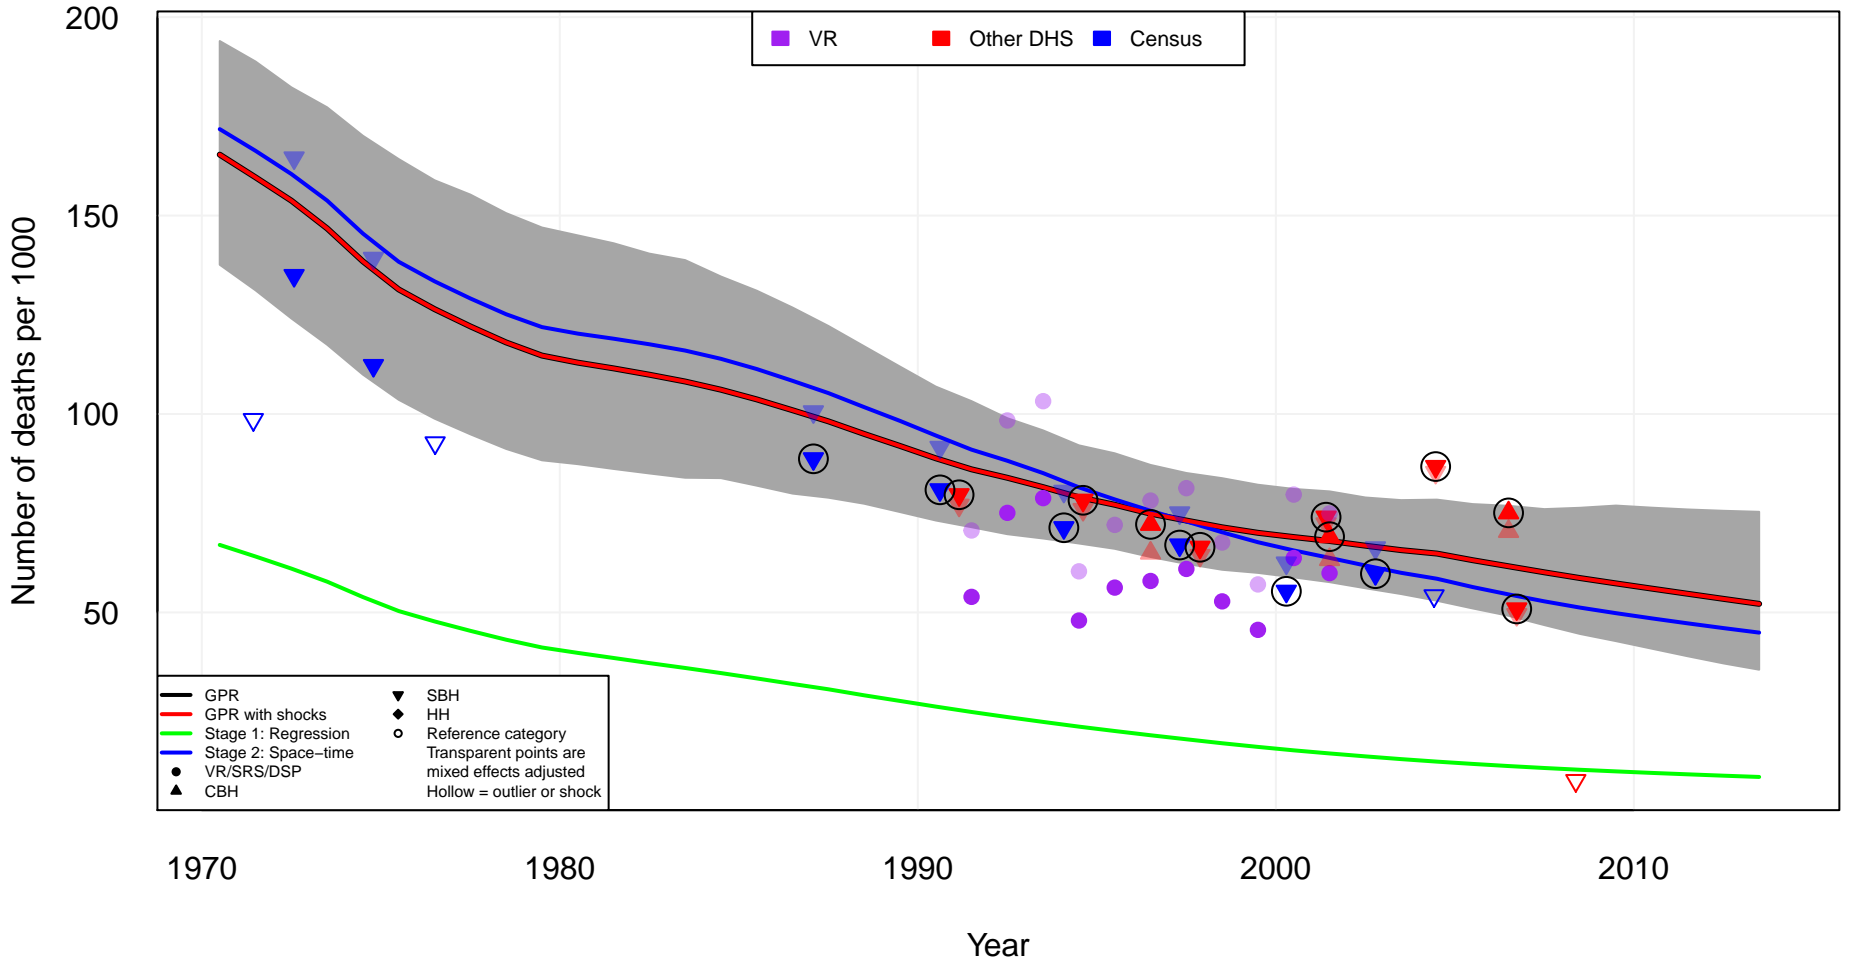

# Oceania Marshall Islands (MHL)

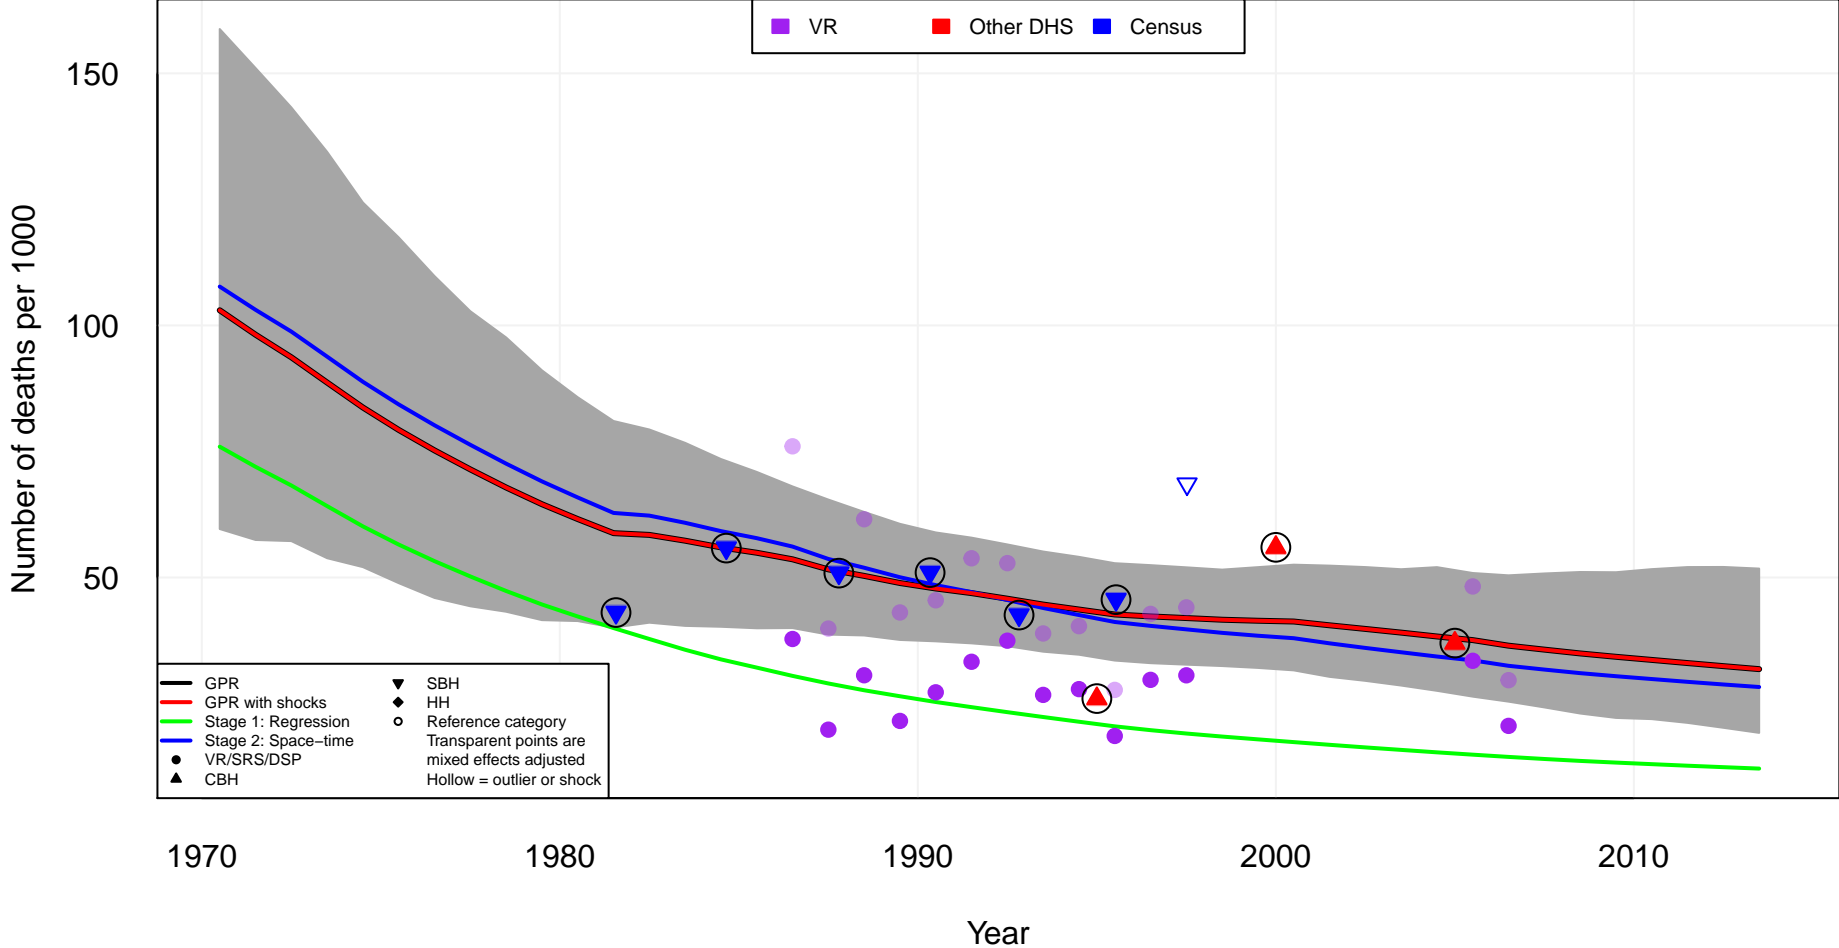

# Oceania Papua New Guinea (PNG)

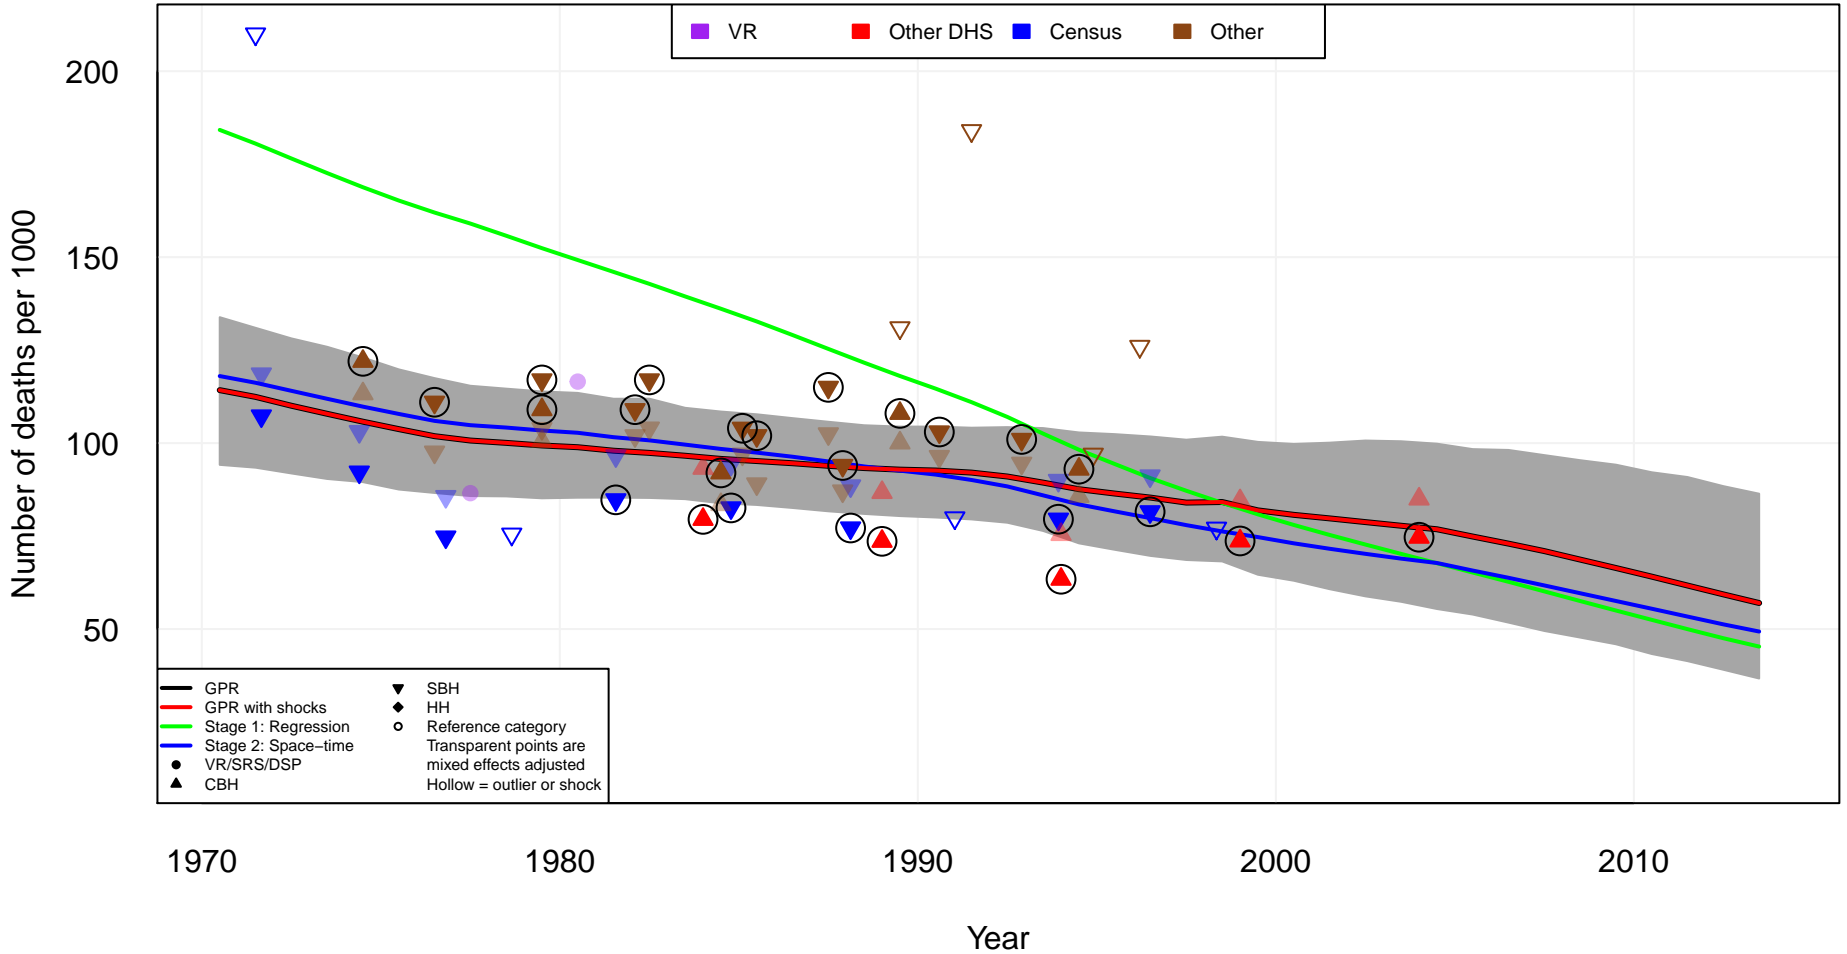

# Oceania Solomon Islands (SLB)

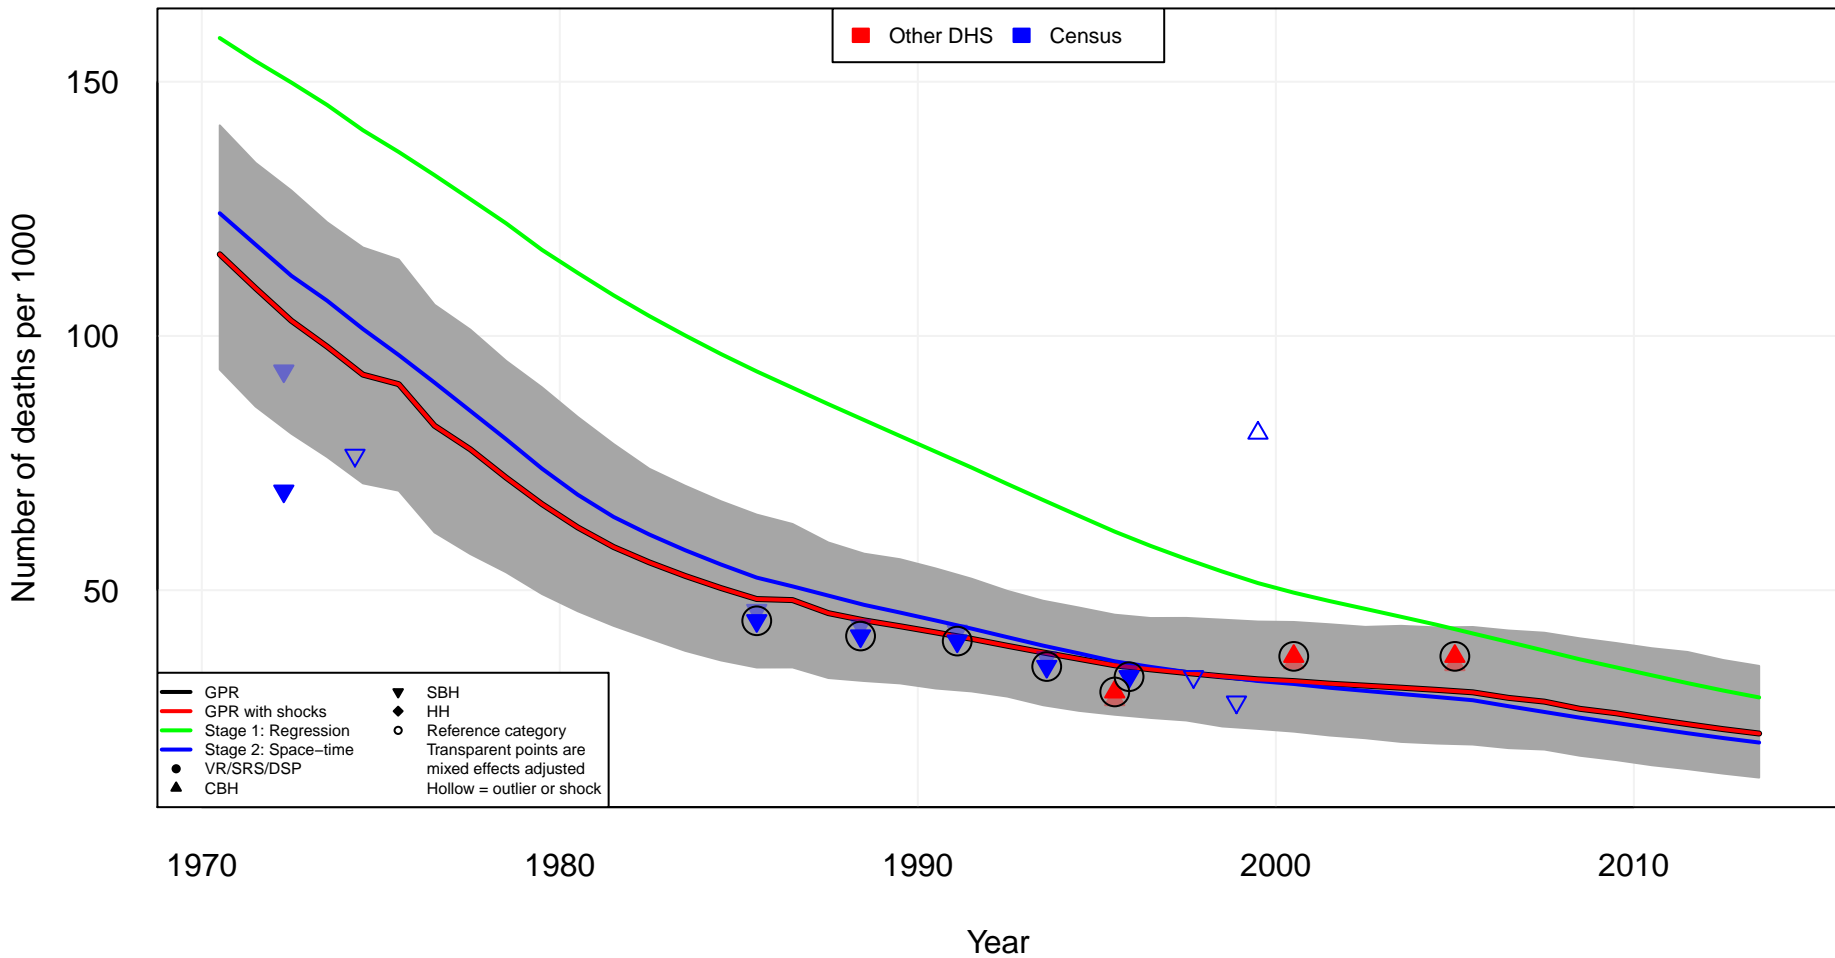

# Oceania Tonga (TON)

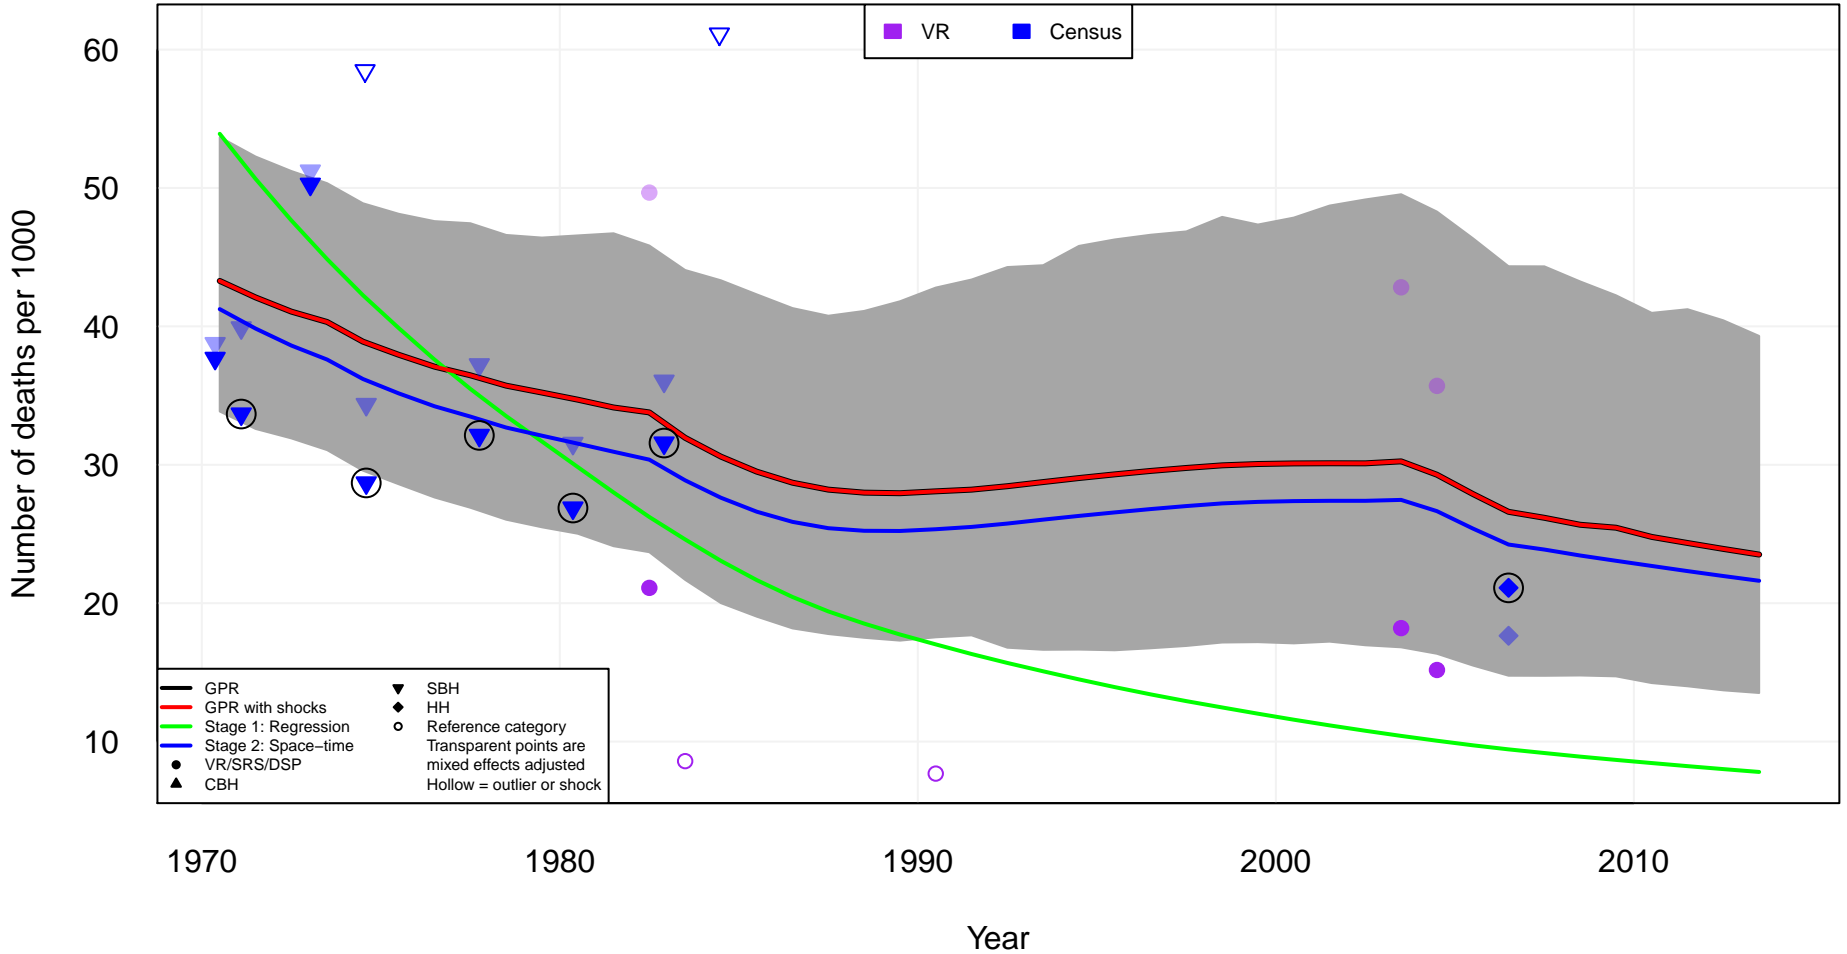



Oceania  
Vanuatu (VUT)

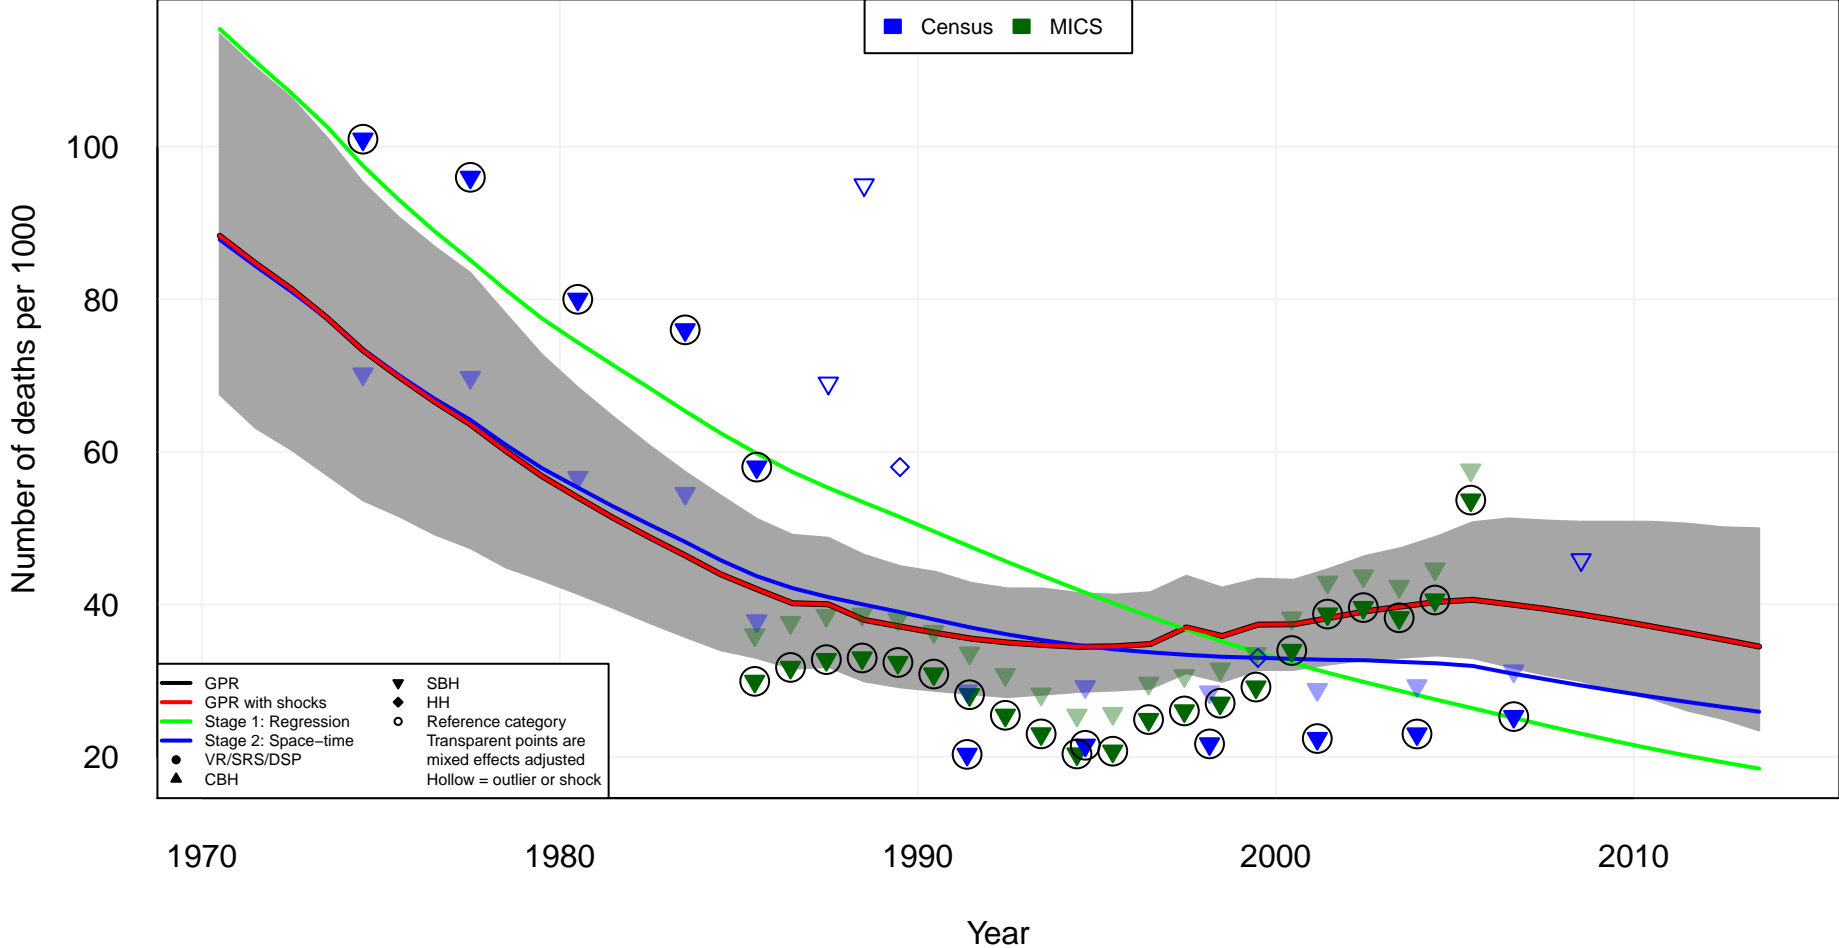

# Oceania Samoa (WSM)

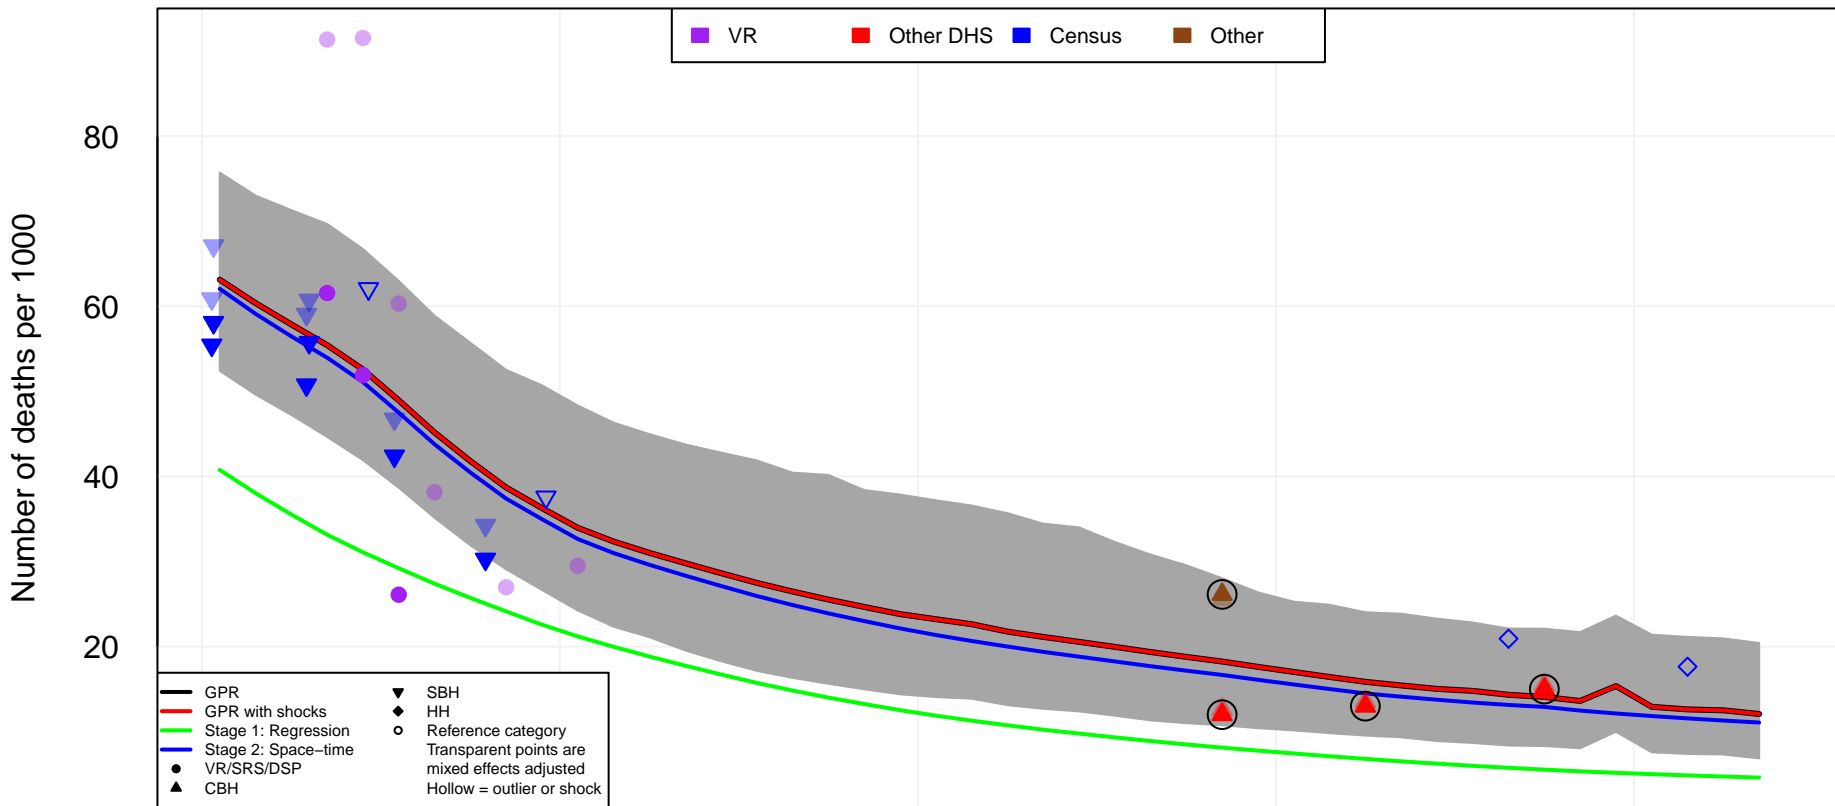

sub-Saharan Africa, Central  
Angola (AGO)

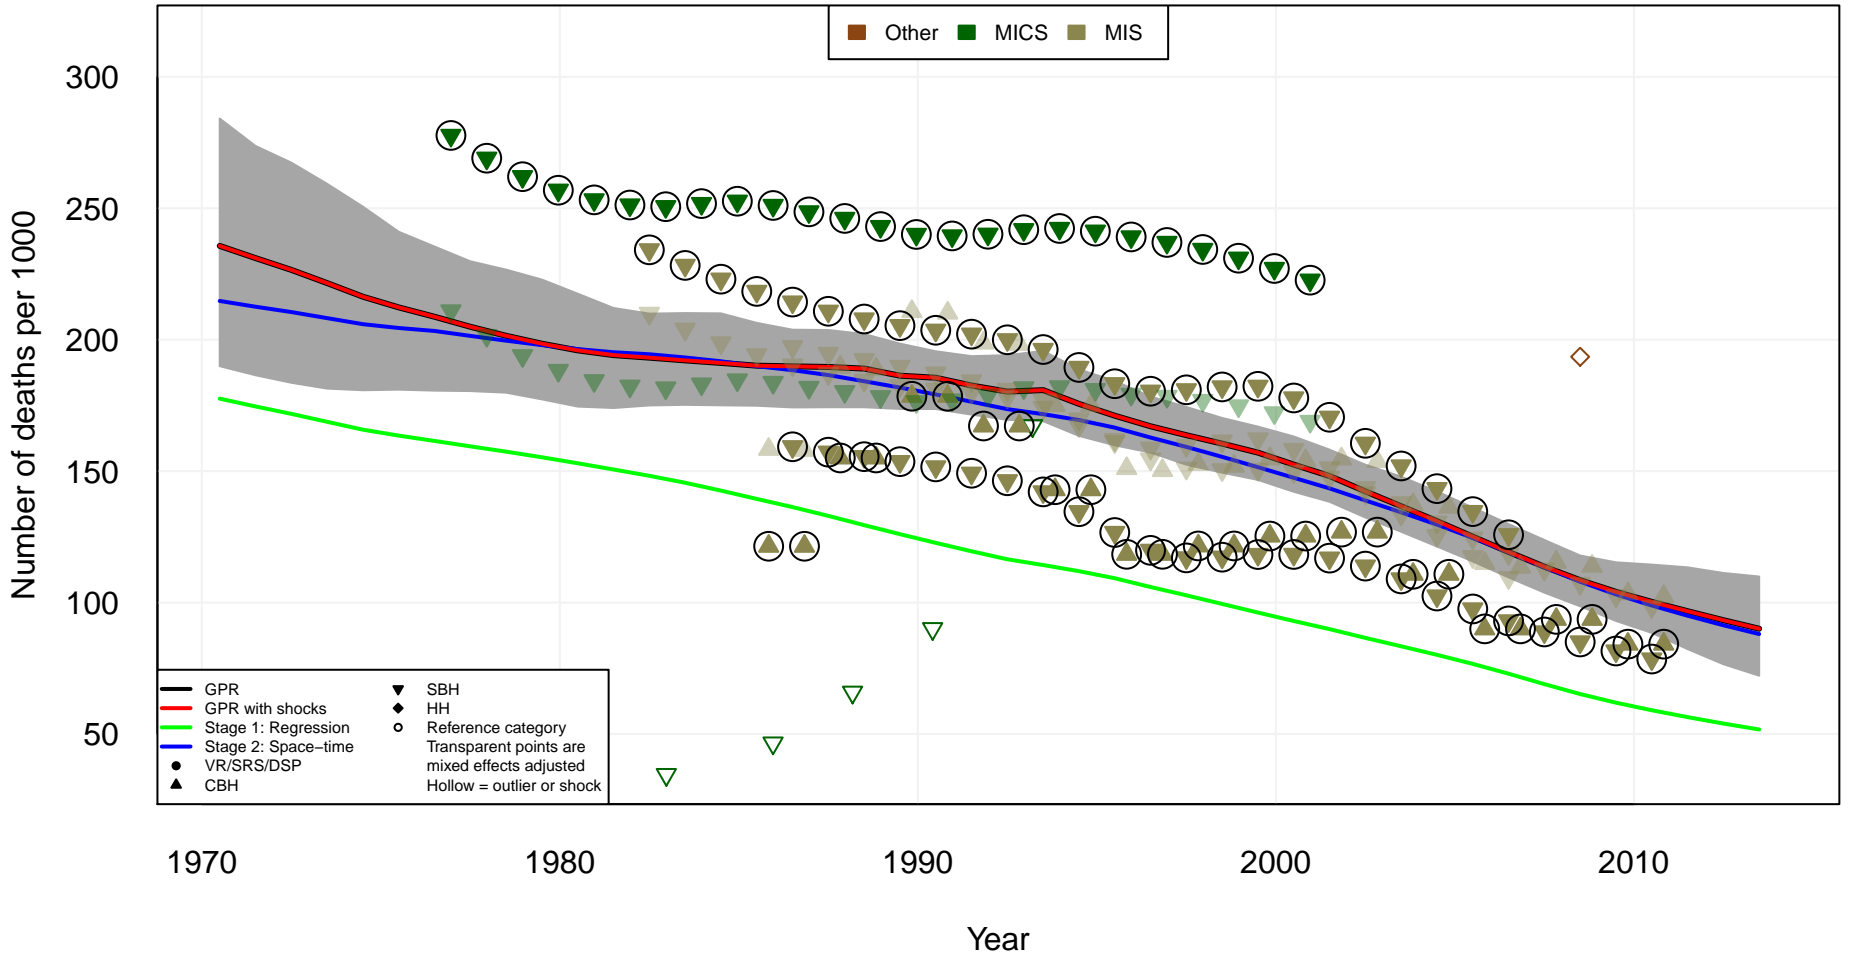

# sub-Saharan Africa, Central Central African Republic (CAF)

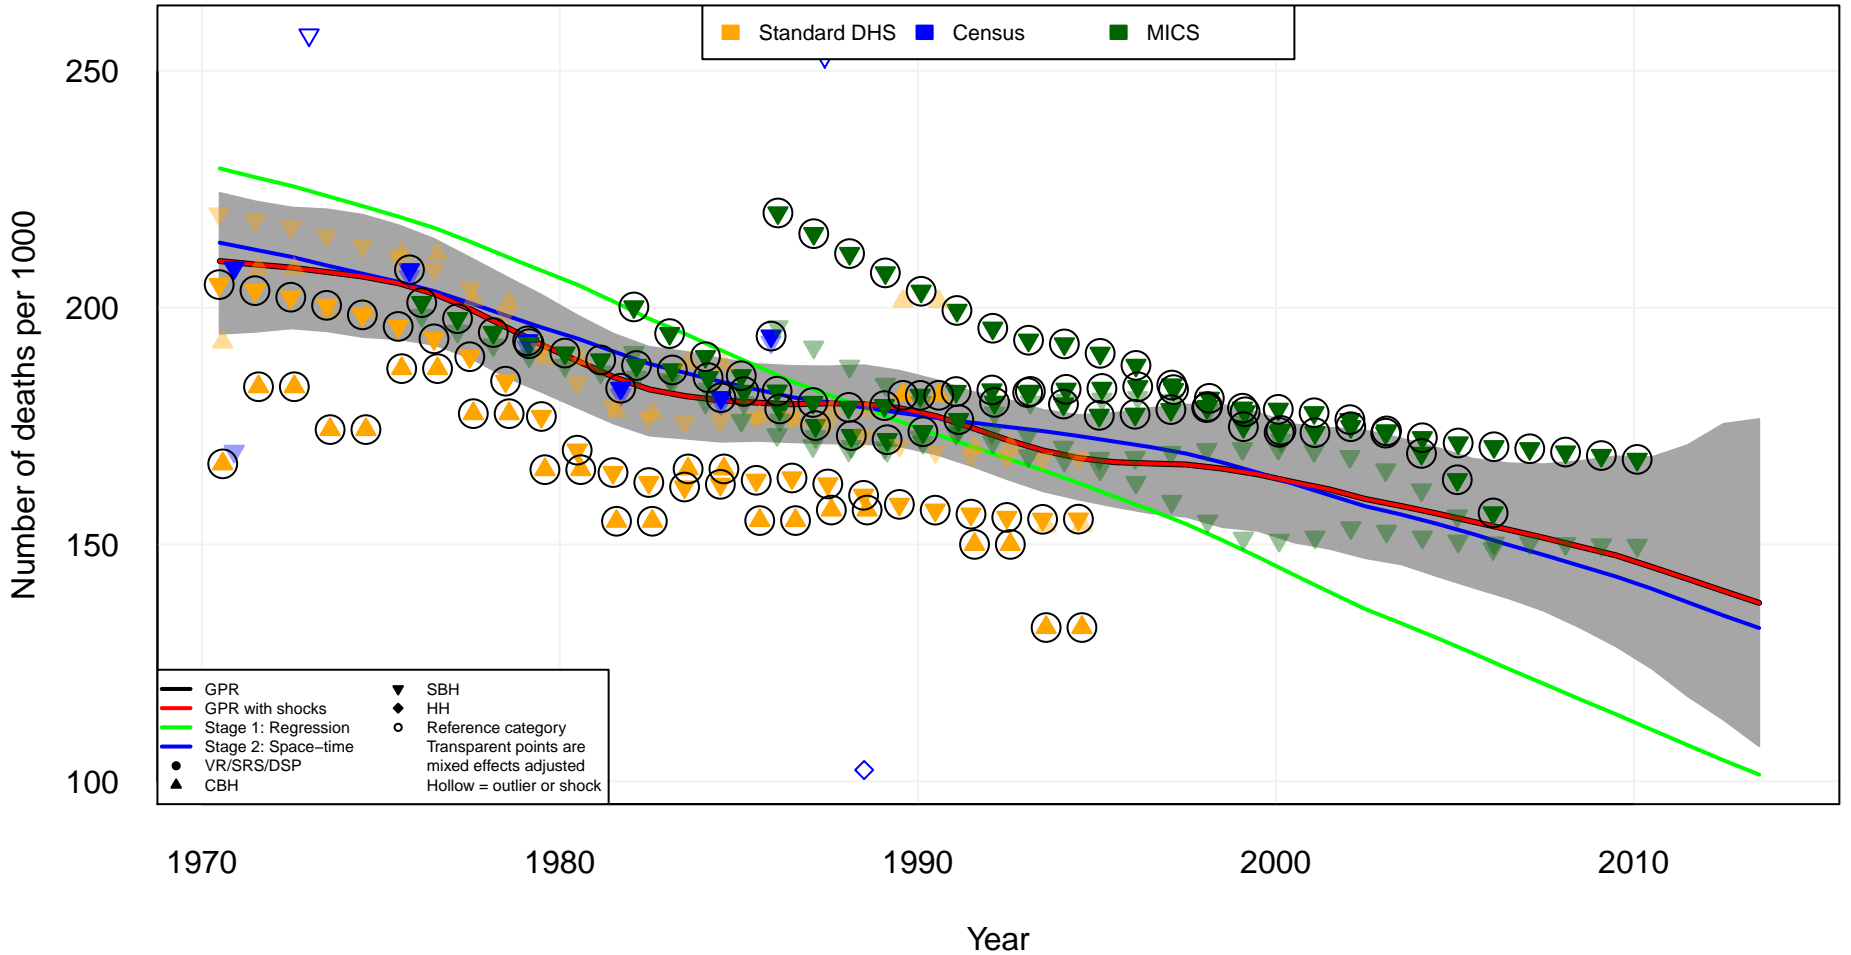

sub-Saharan Africa, Central  
Democratic Republic of the Congo (COD)

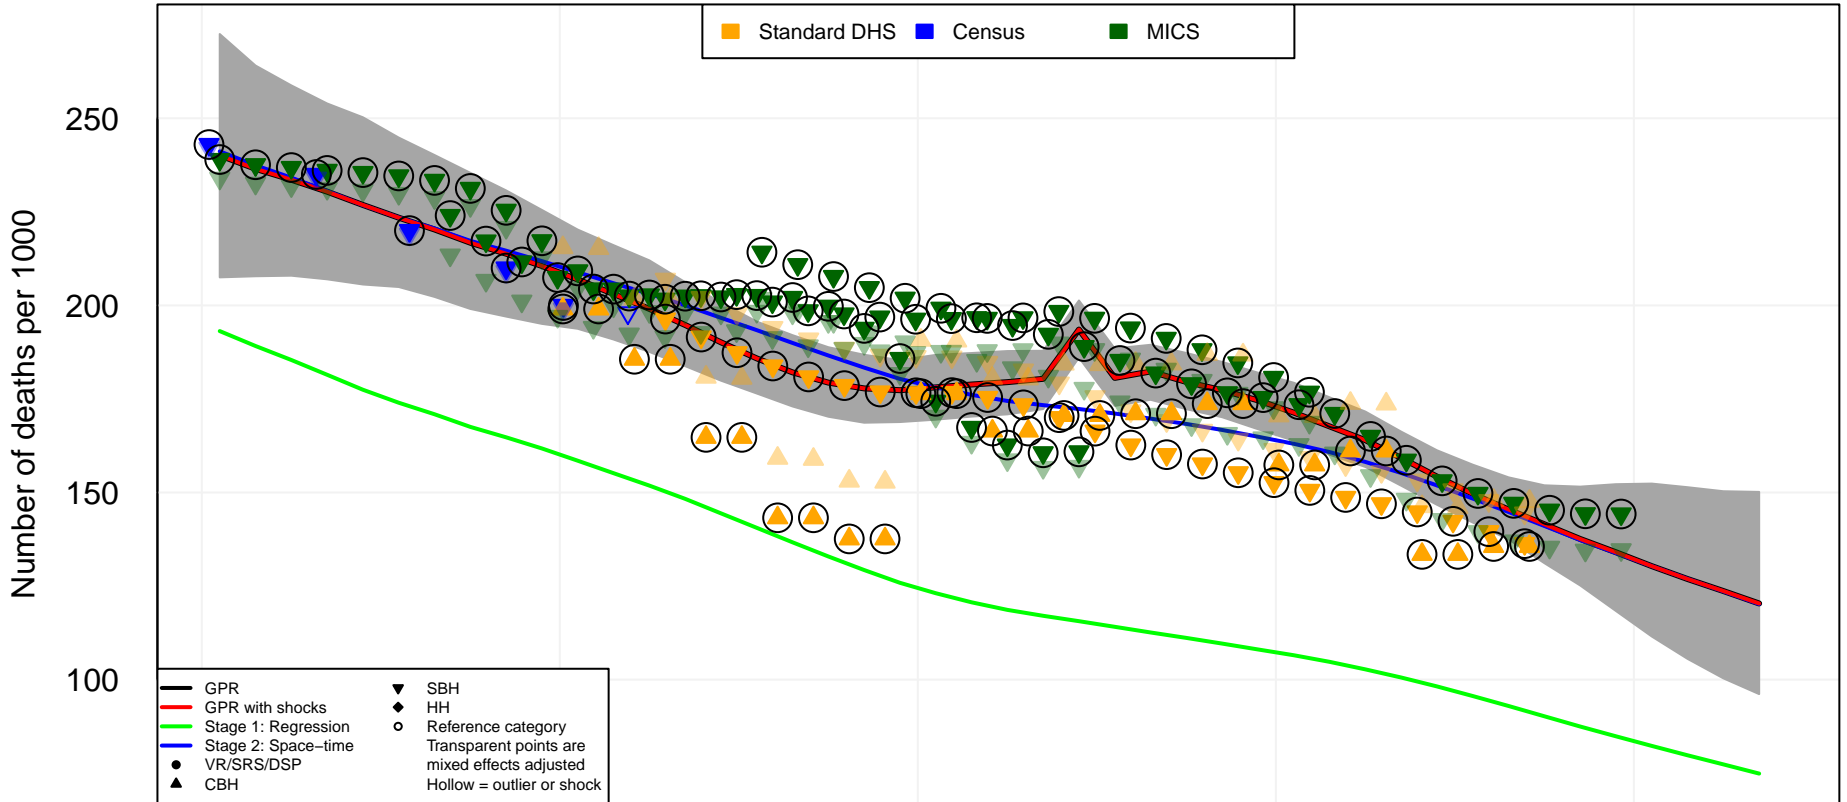

1970

1980

1990

2000

2010

Year



sub-Saharan Africa, Central  
Gabon (GAB)

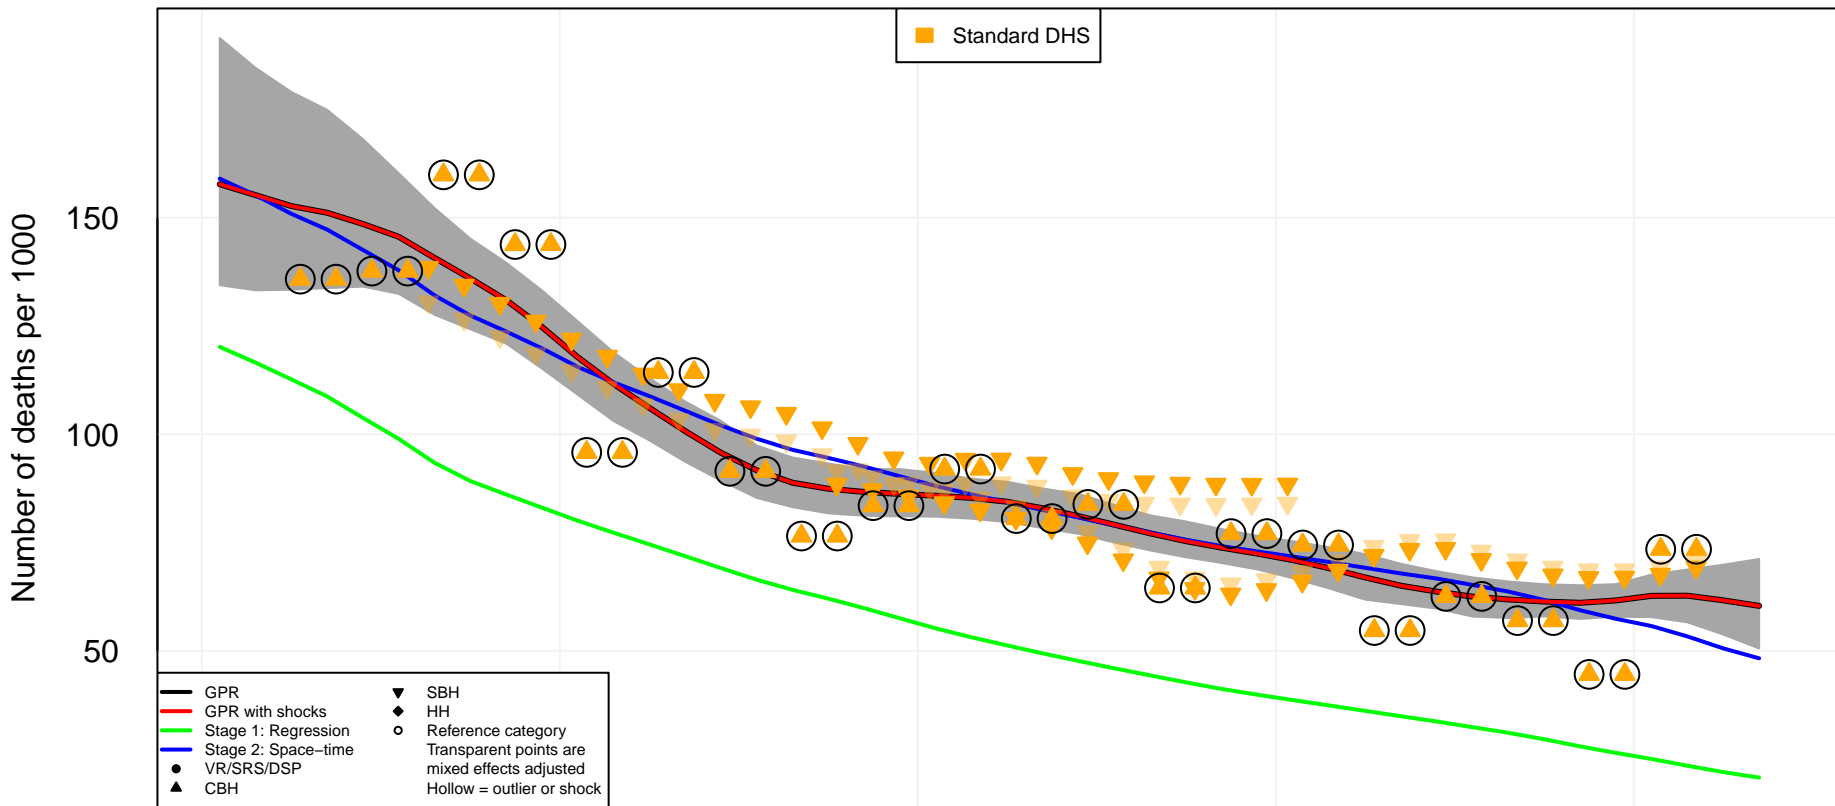

1970

1980

1990

2000

2010

Year

# sub-Saharan Africa, Central Equatorial Guinea (GNQ)

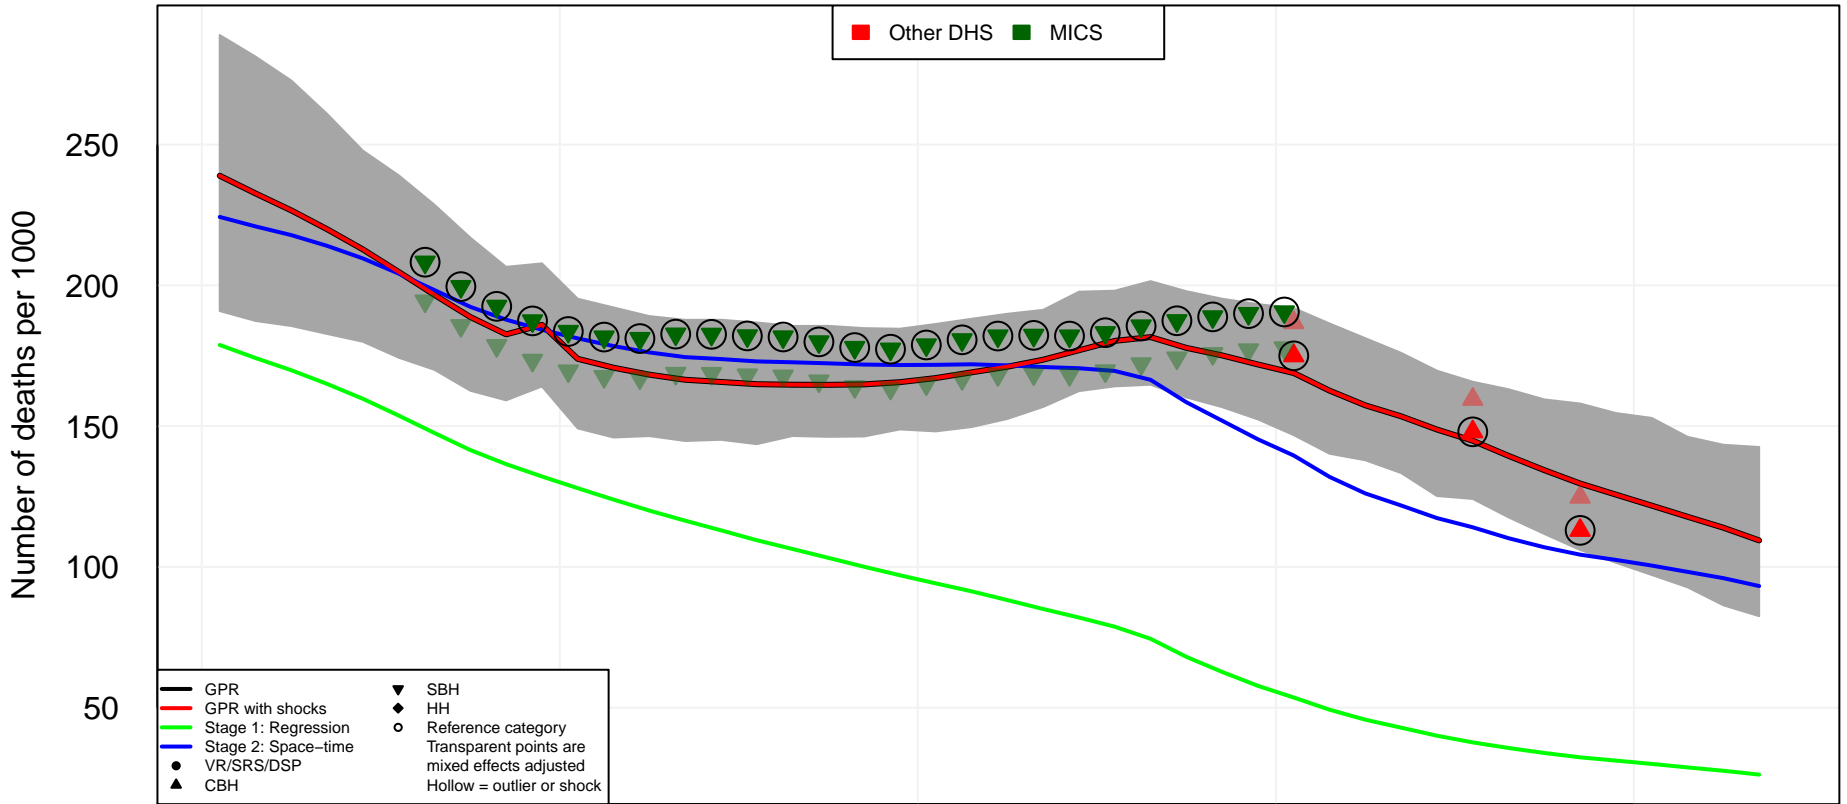

1970

1980

1990

2000

2010

Year



# sub-Saharan Africa, Eastern Burundi (BDI)

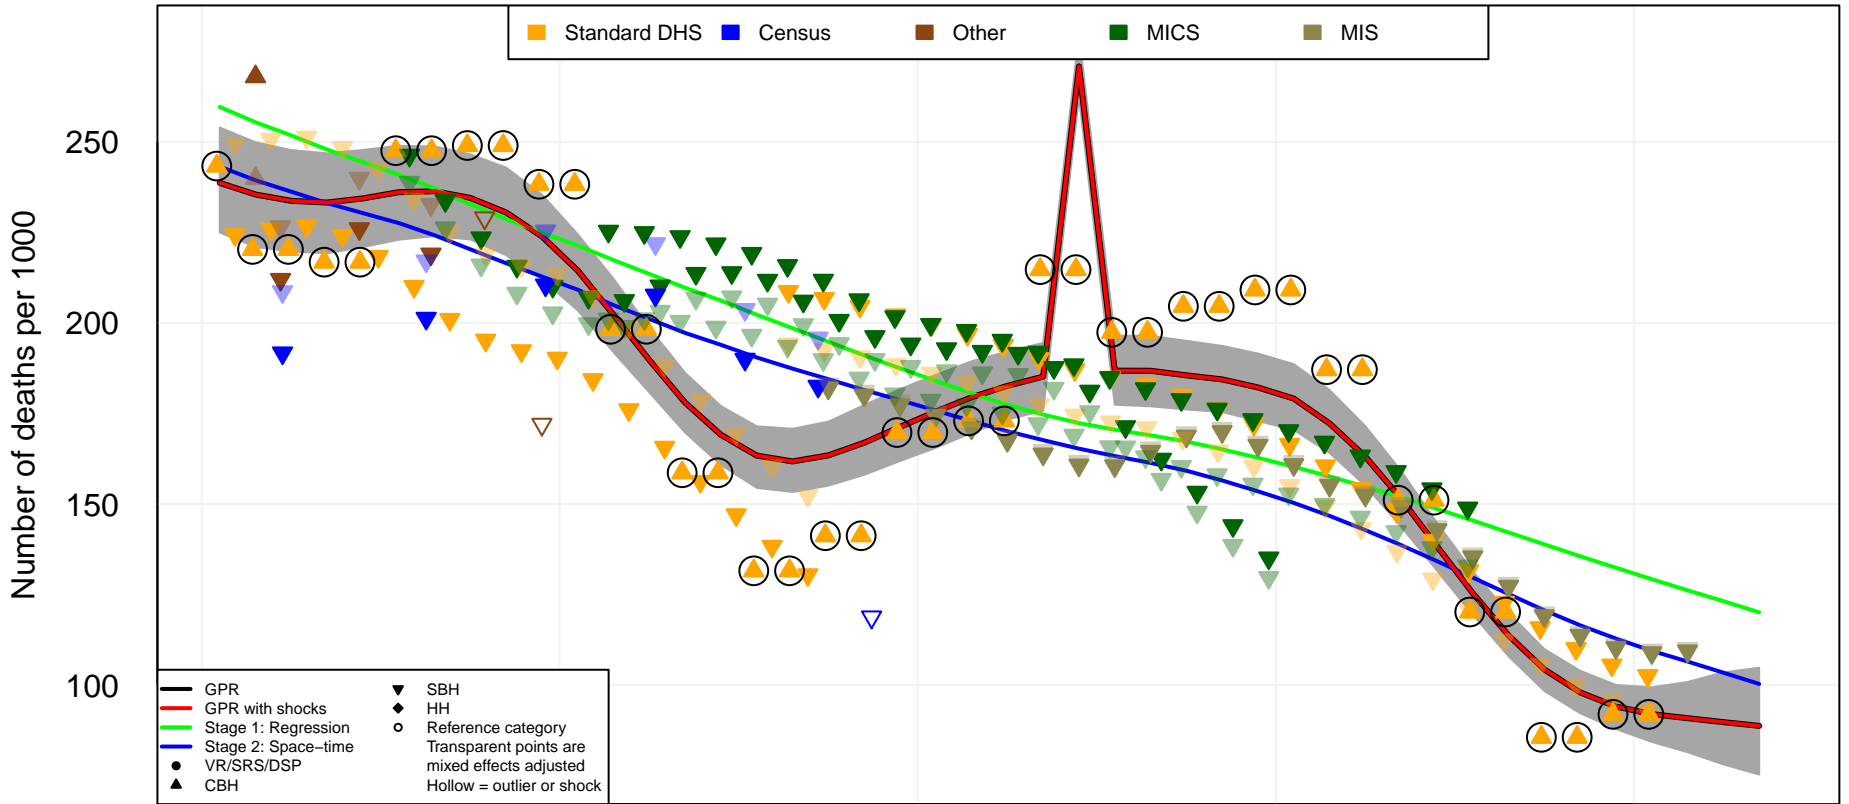

1970

1980

1990

2000

2010

Year

# sub-Saharan Africa, Eastern Comoros (COM)

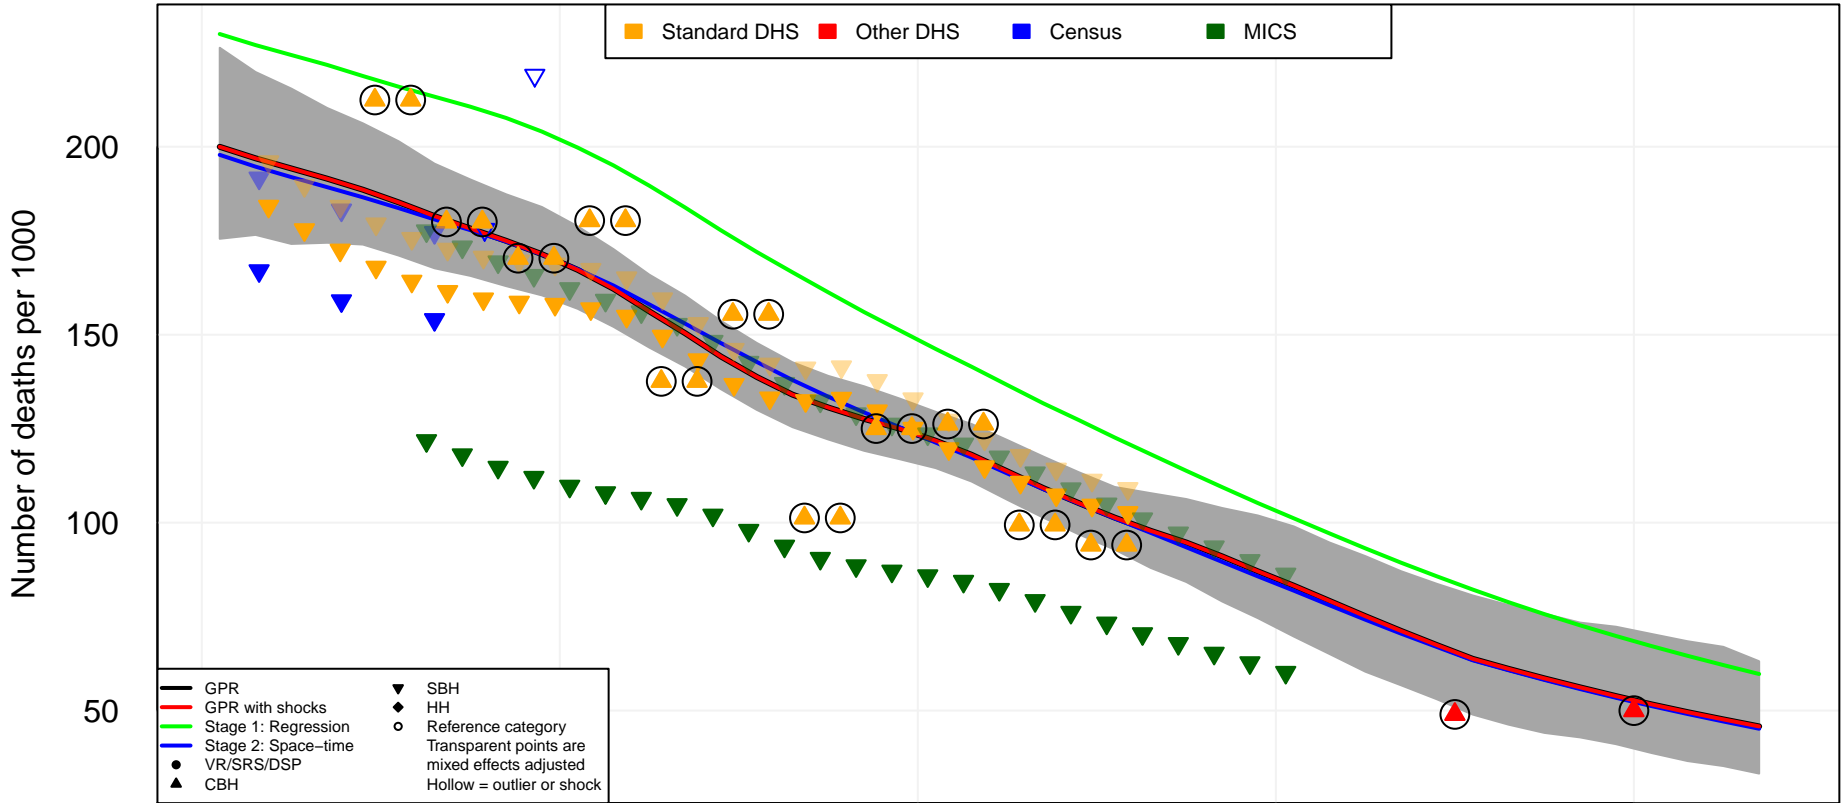

1970

1980

1990

2000

2010

Year

sub-Saharan Africa, Eastern  
Djibouti (DJI)

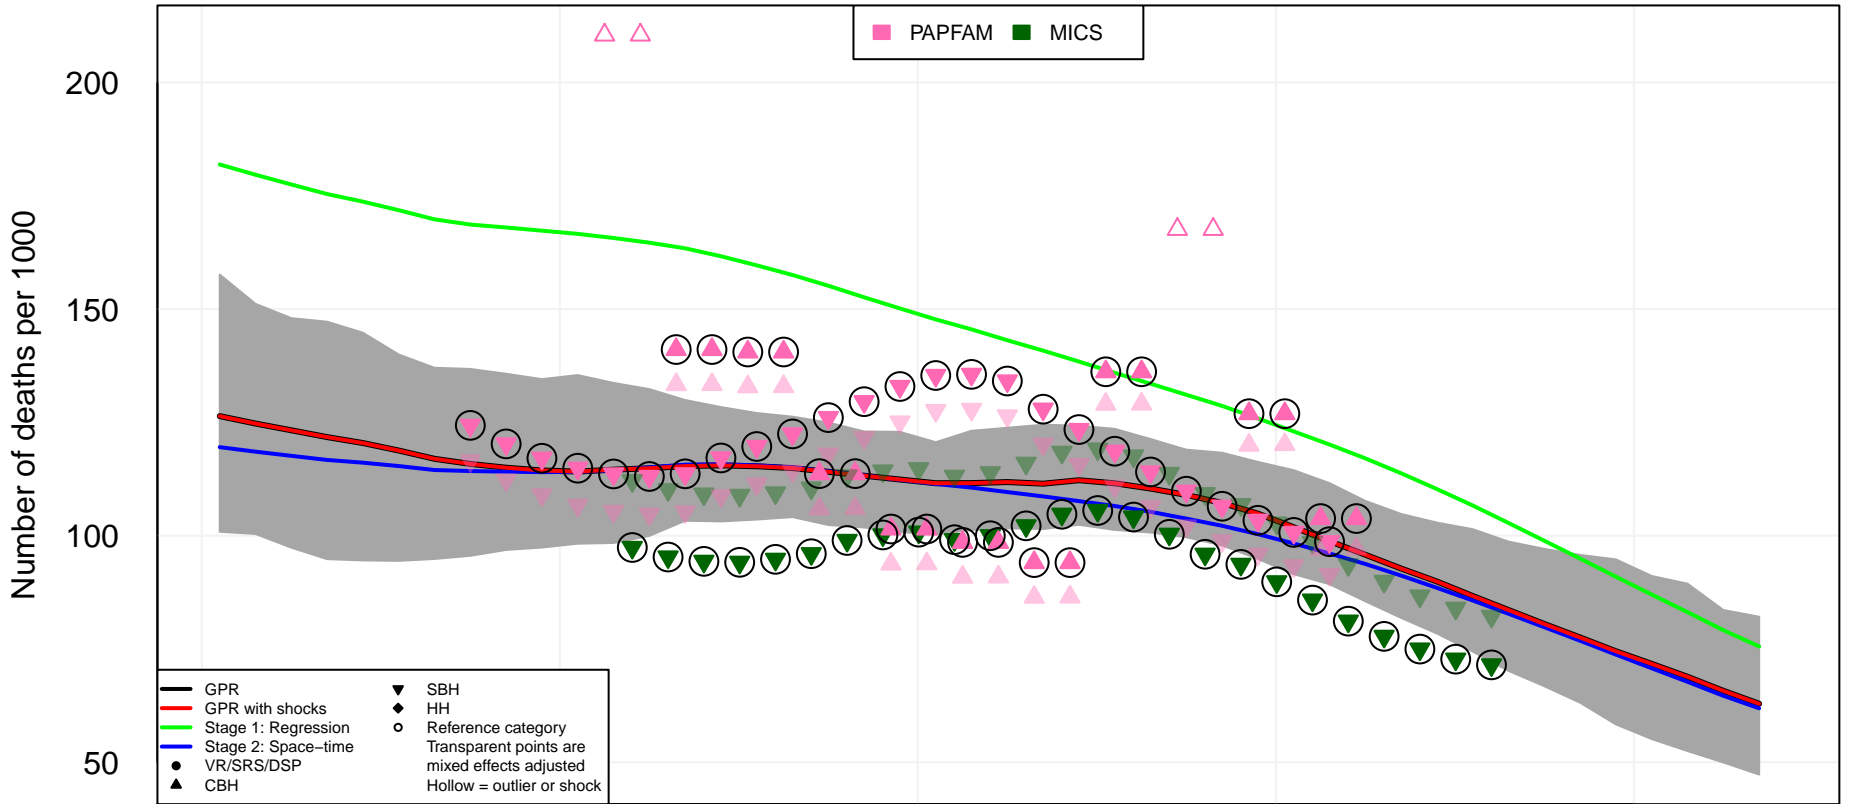

1970

1980

1990

2000

2010

Year

# sub-Saharan Africa, Eastern Eritrea (ERI)

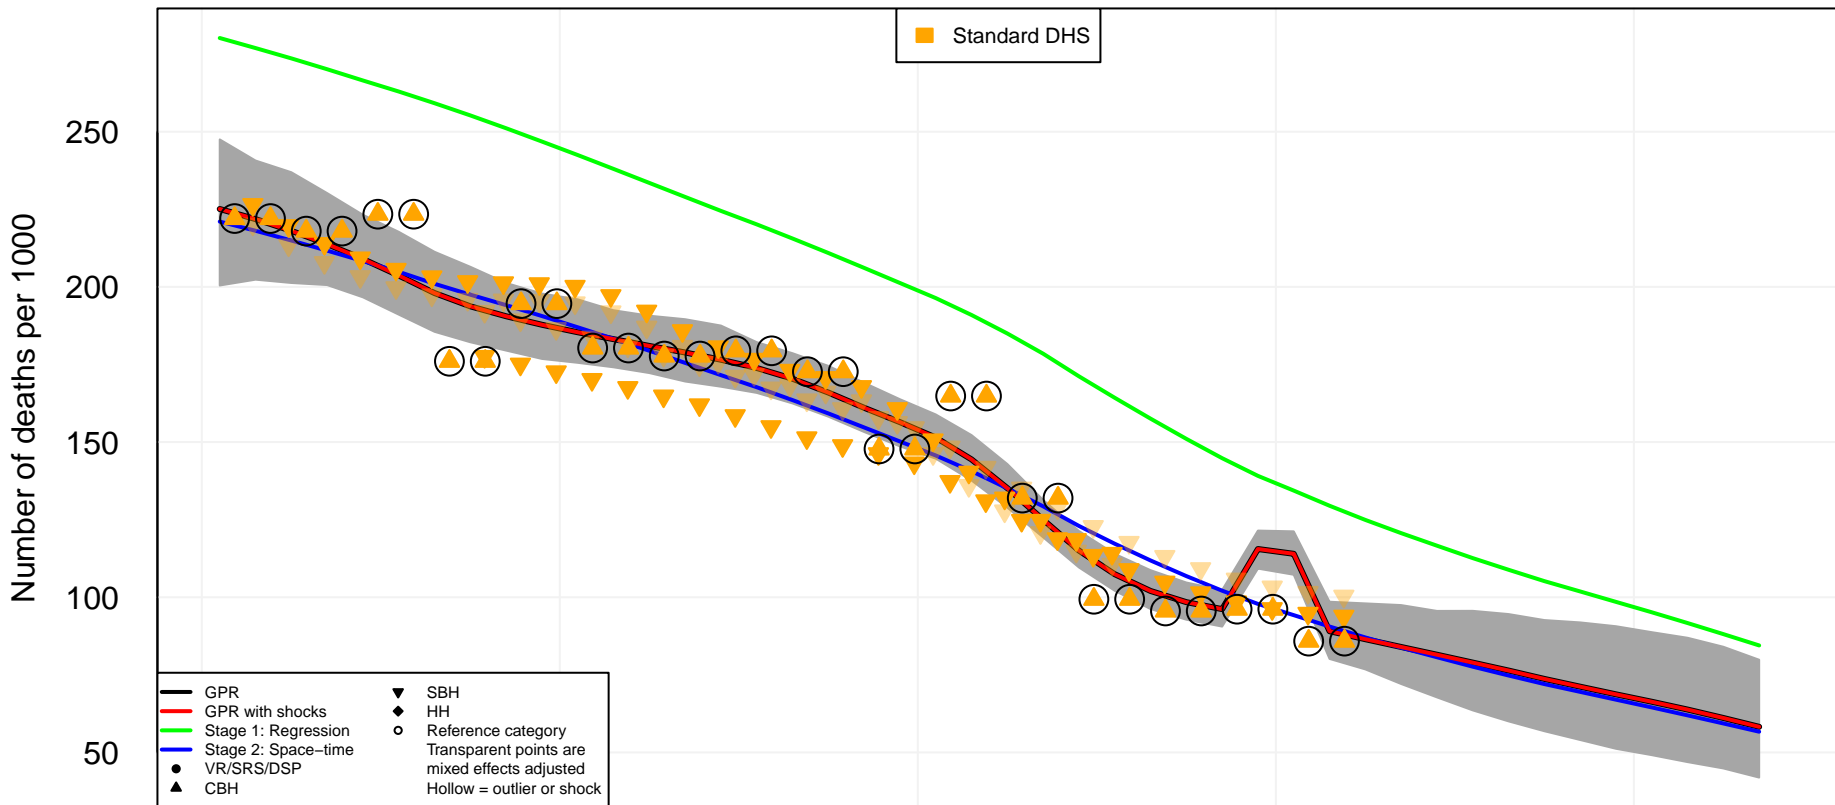

1970

1980

1990

2000

2010

Year

# sub-Saharan Africa, Eastern Ethiopia (ETH)

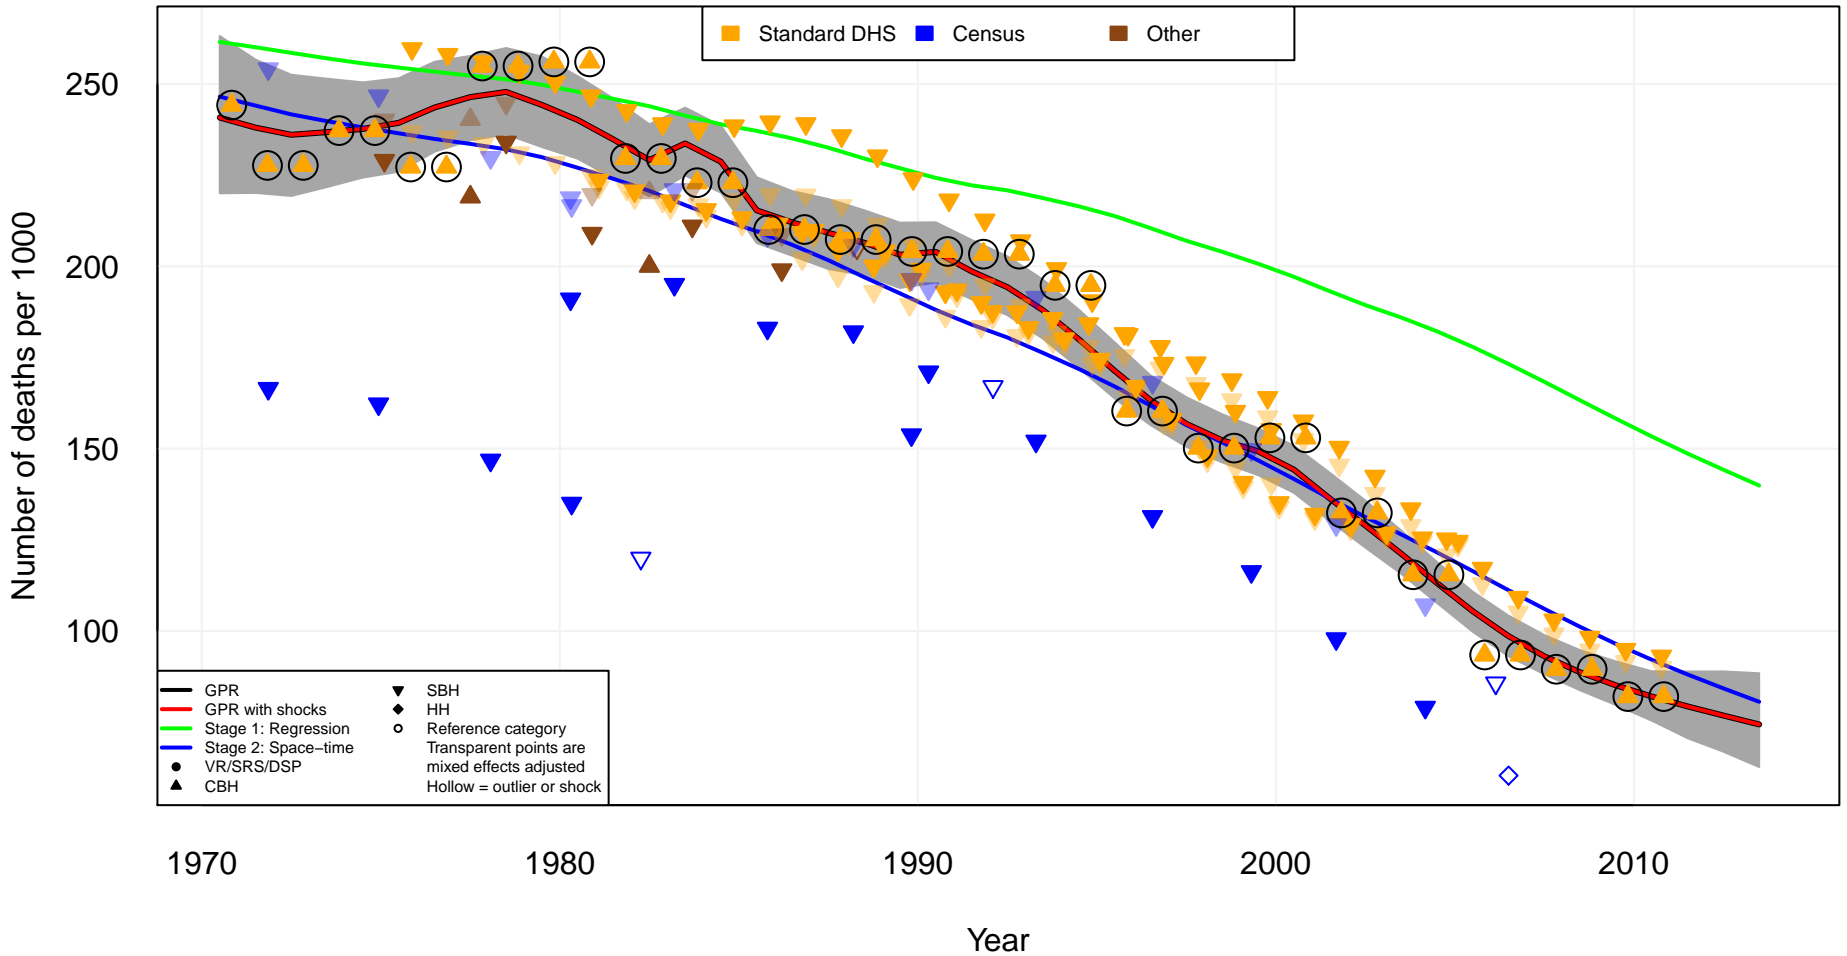

# sub-Saharan Africa, Eastern Kenya (KEN)

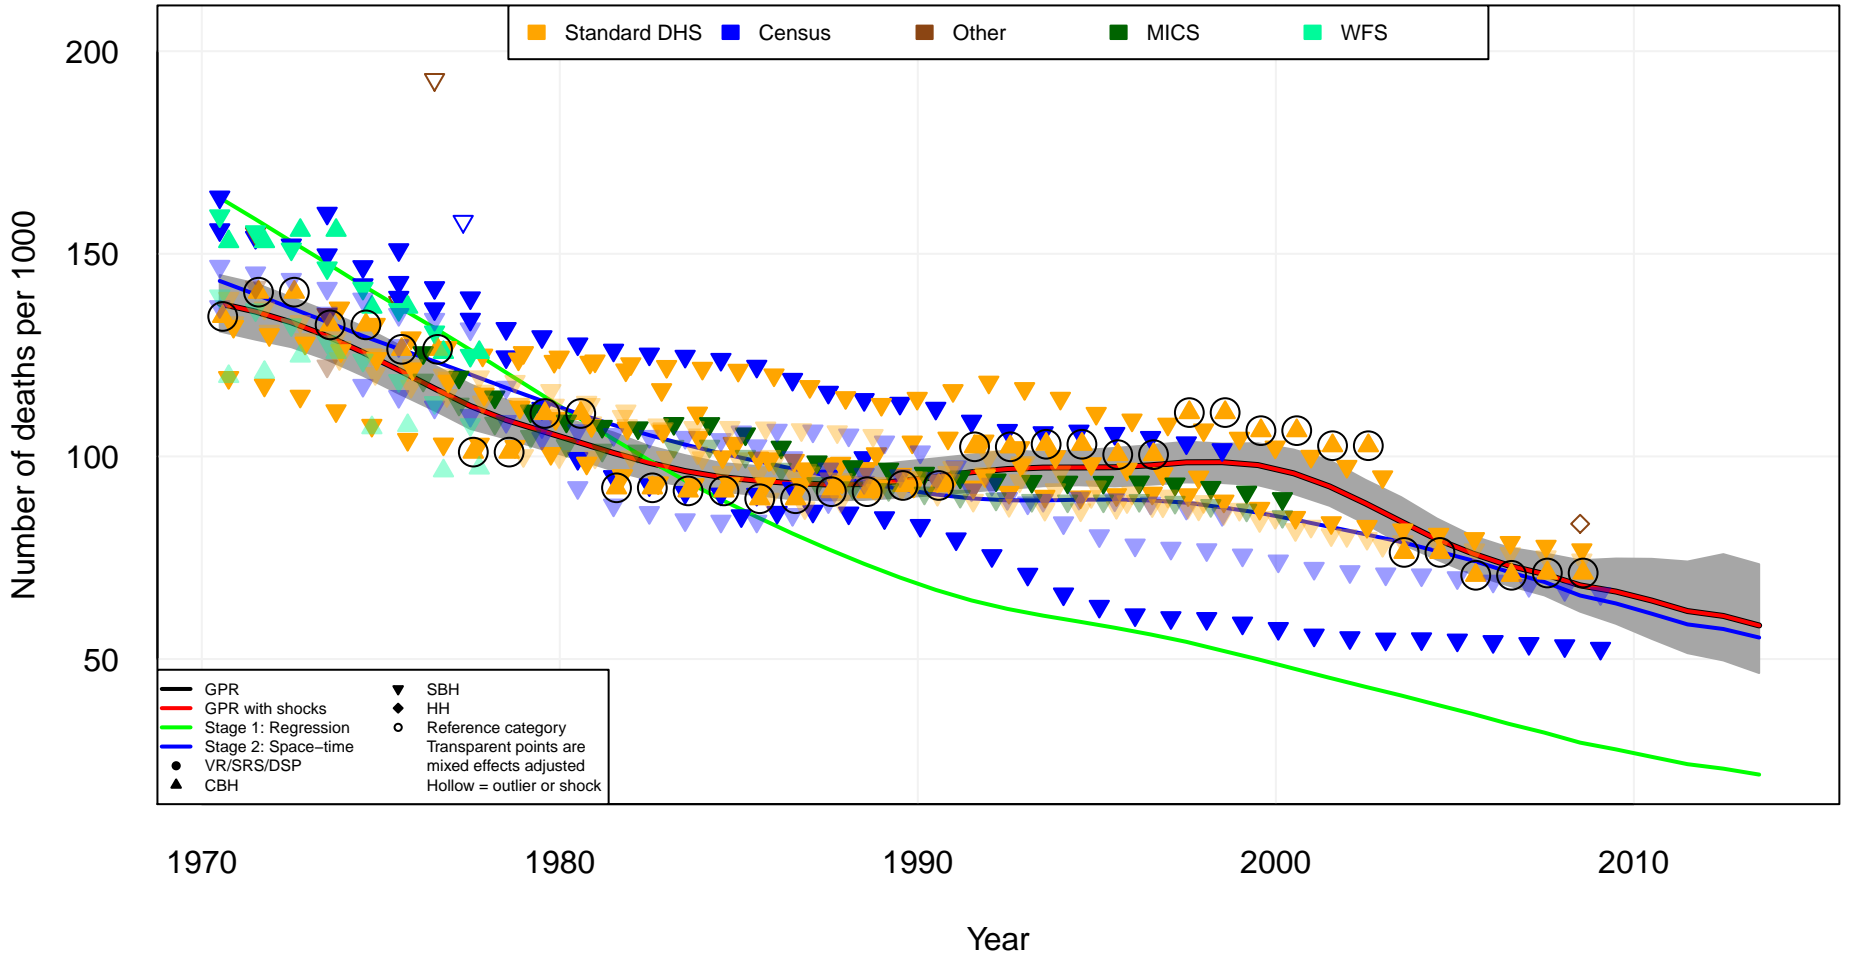

# sub-Saharan Africa, Eastern Madagascar (MDG)

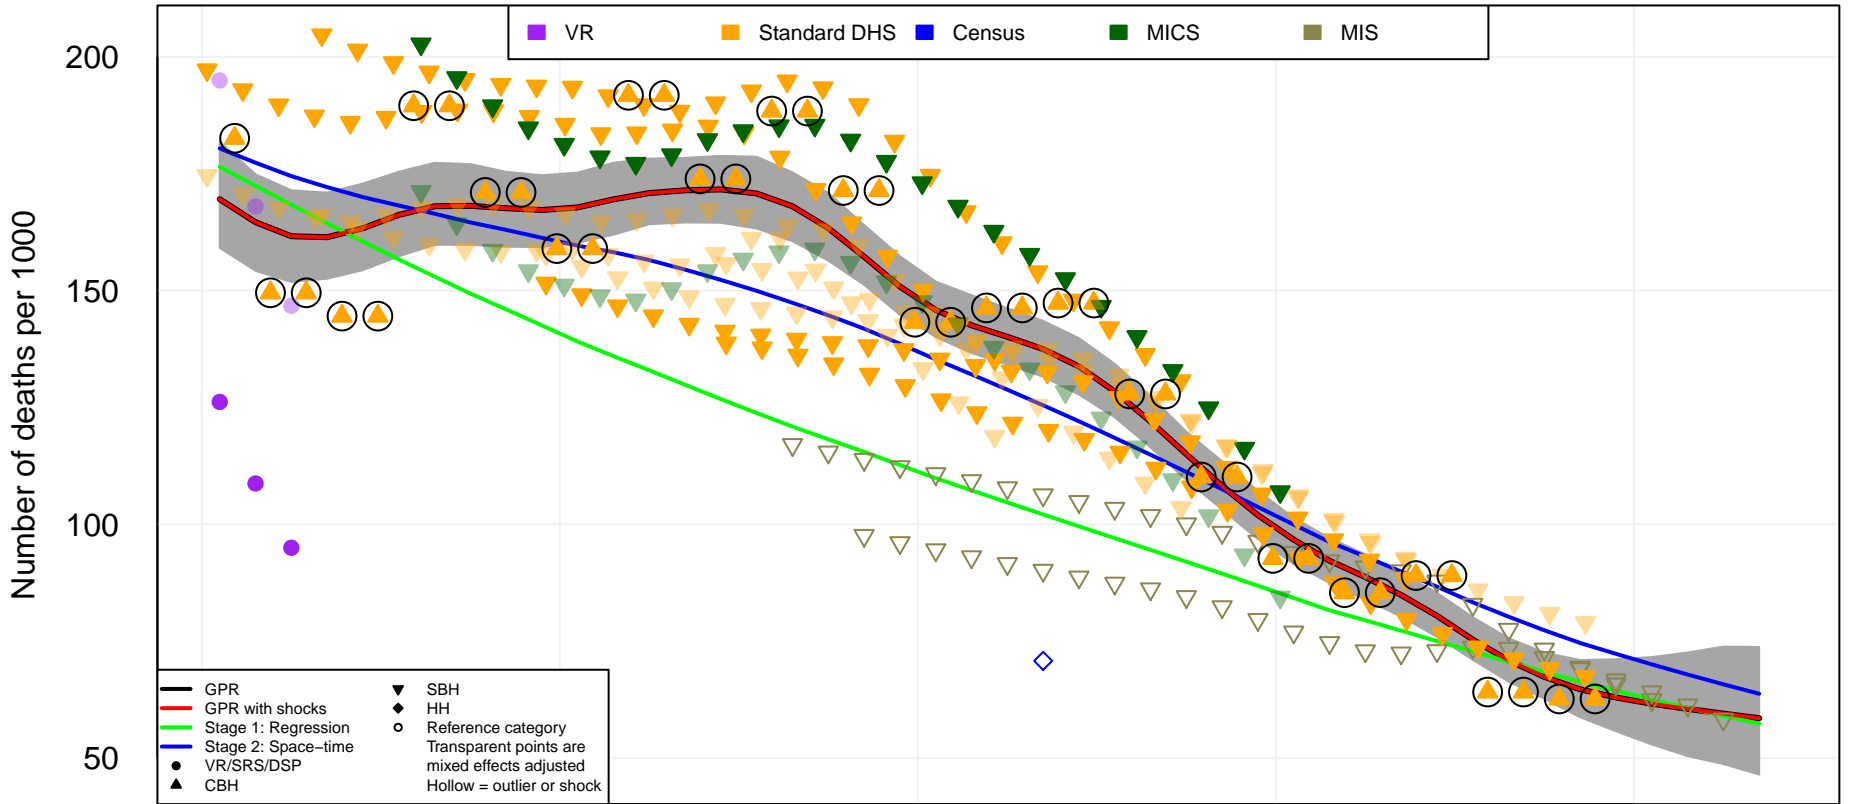

1970

1980

1990

2000

2010

Year

200

150

100

50

Number of deaths per 1000

VR Standard DHS Census MICS MIS

GPR  
GPR with shocks  
Stage 1: Regression  
Stage 2: Space-time  
VR/SRS/DSP  
CBH  
SBH  
HH  
Reference category  
Transparent points are mixed effects adjusted  
Hollow = outlier or shock

# sub-Saharan Africa, Eastern Mozambique (MOZ)

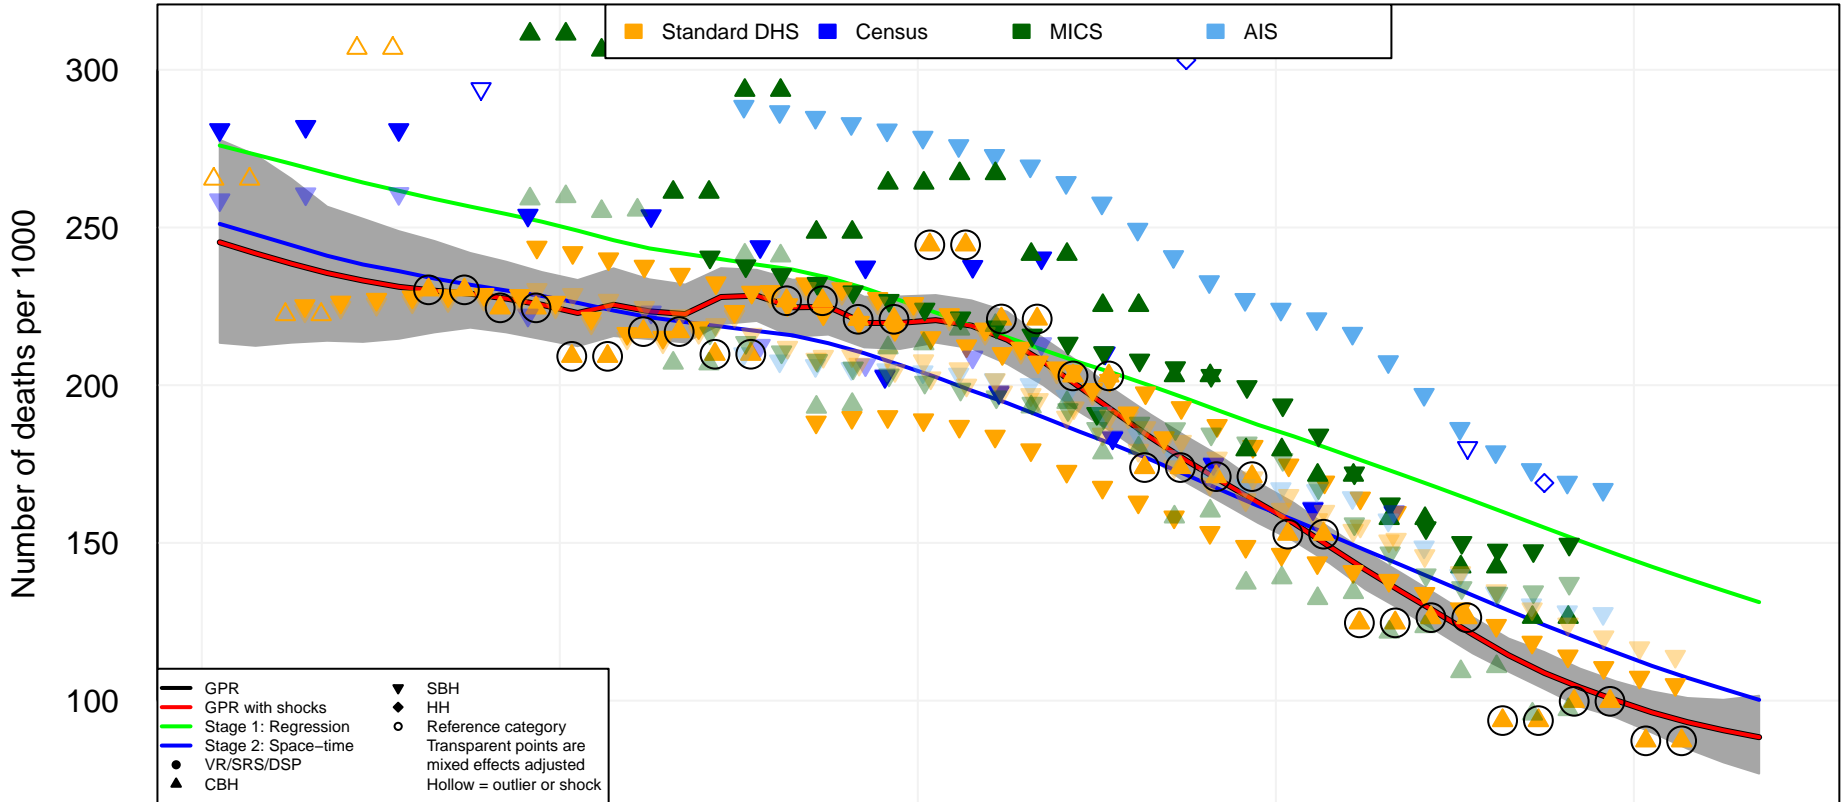

1970

1980

1990

2000

2010

Year



# sub-Saharan Africa, Eastern Malawi (MWI)

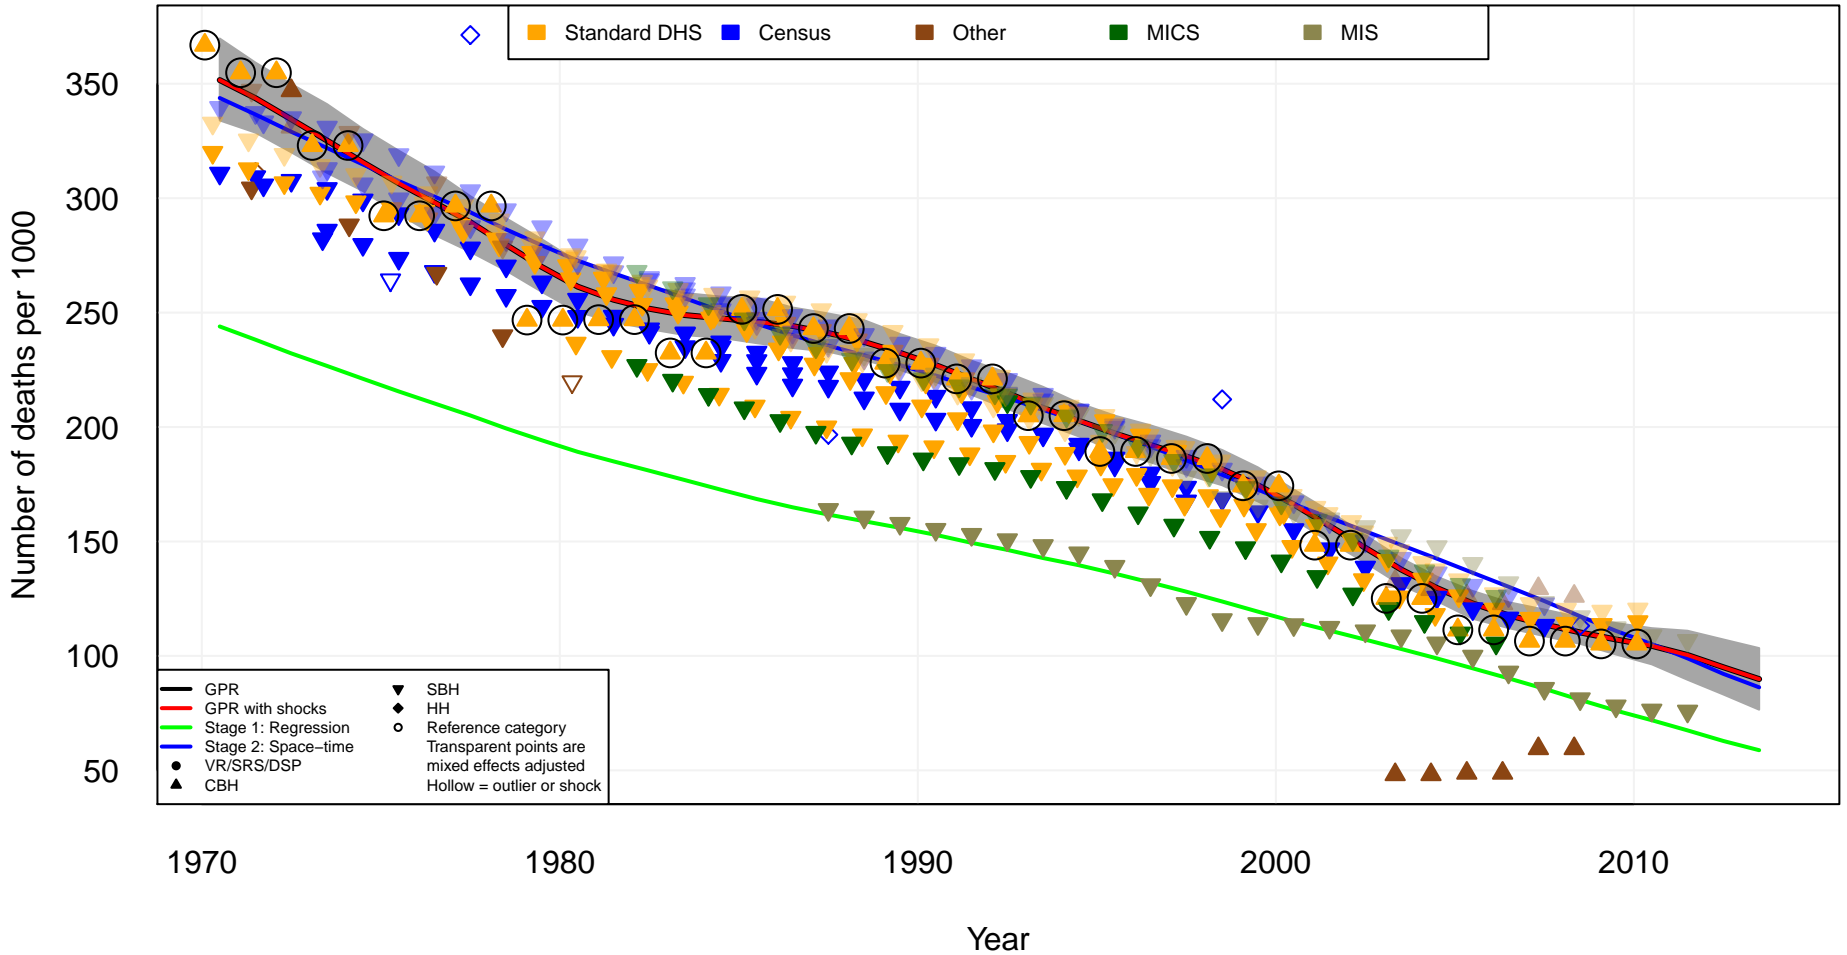

# sub-Saharan Africa, Eastern Rwanda (RWA)

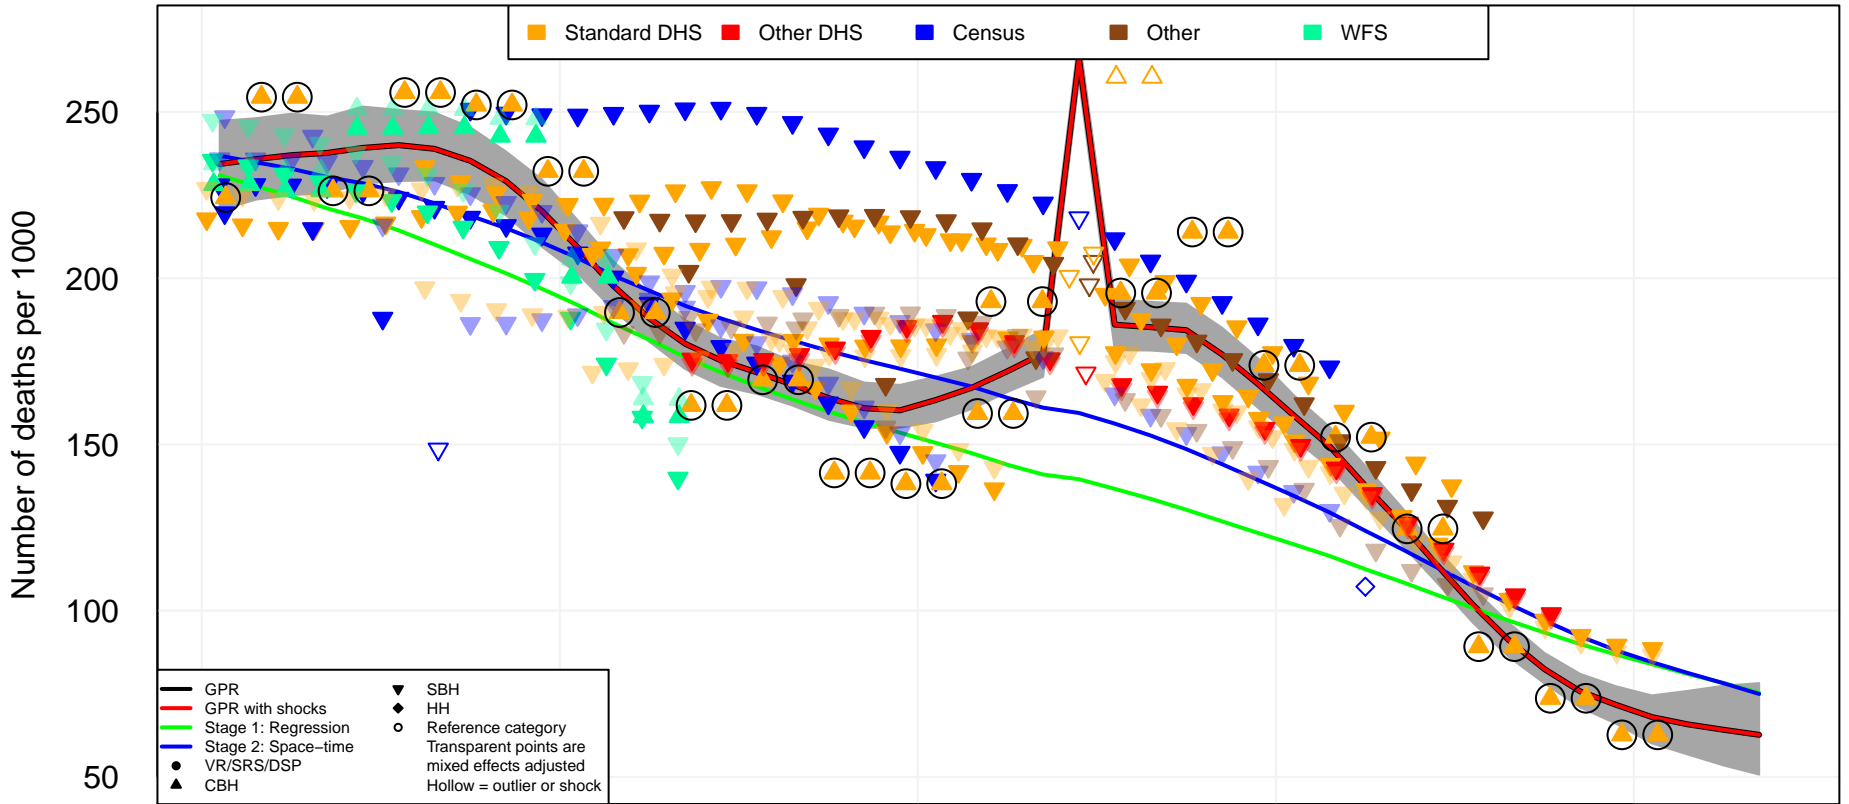

1970

1980

1990

2000

2010

Year



# sub-Saharan Africa, Eastern South Sudan (SSD)

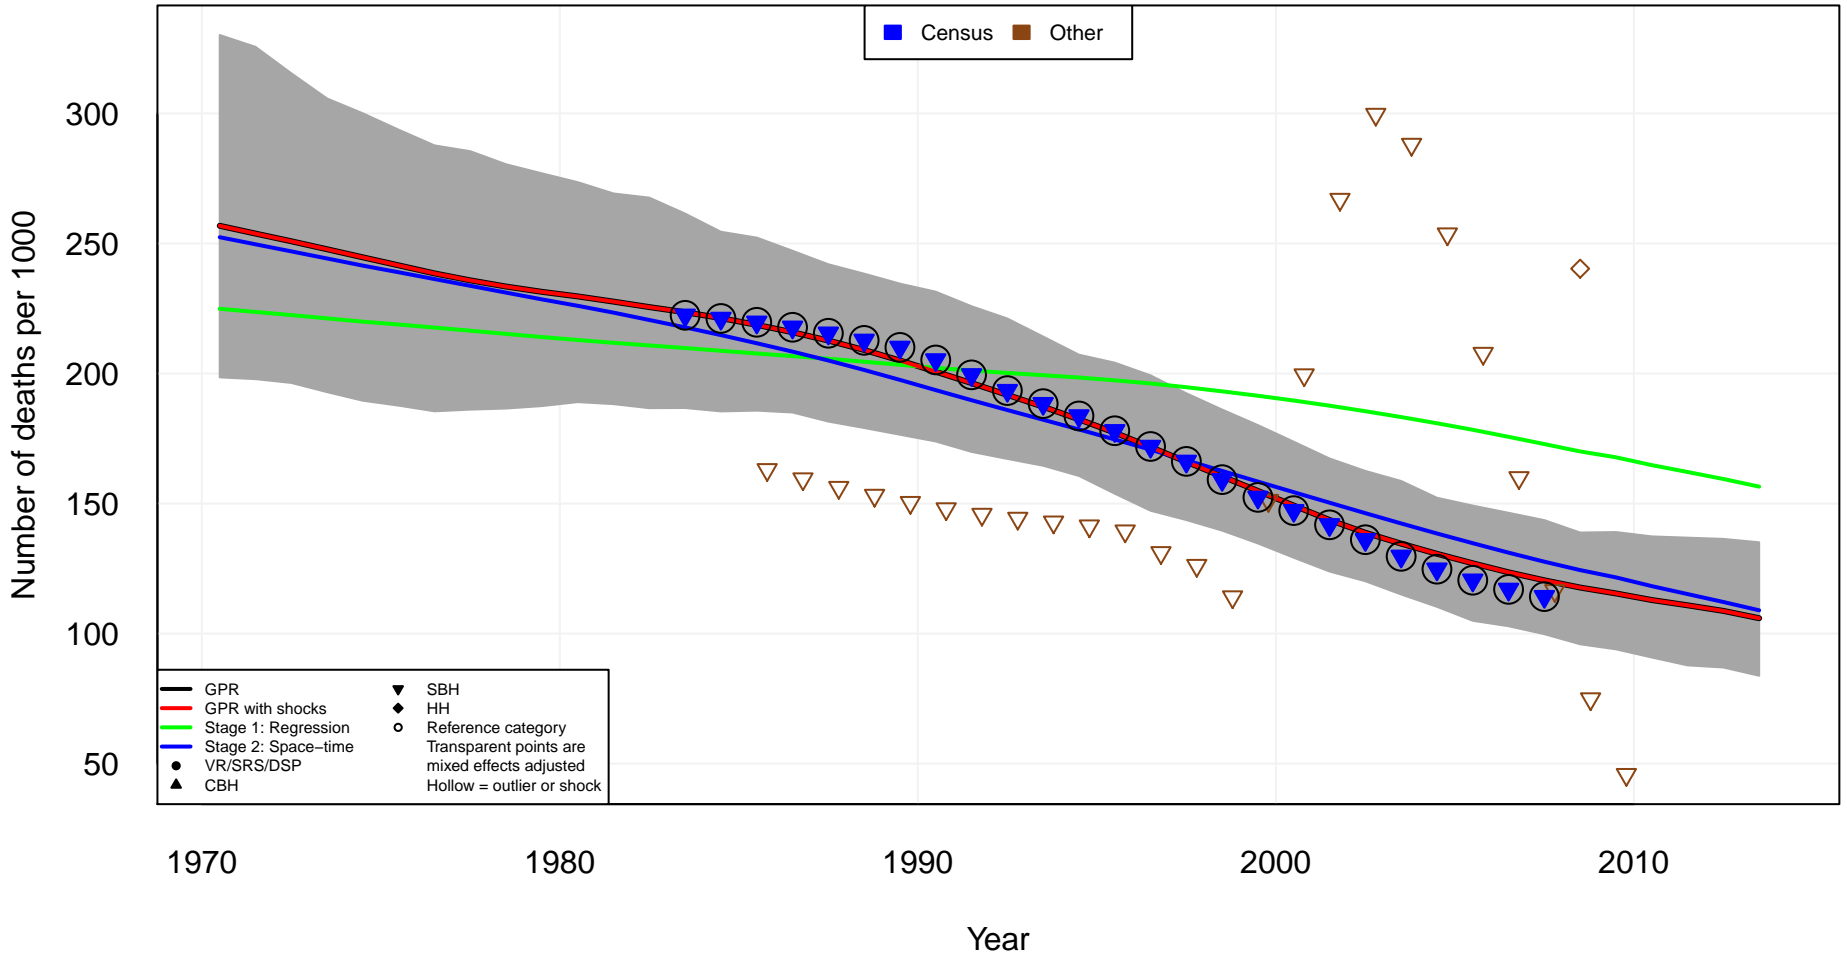

# sub-Saharan Africa, Eastern Tanzania (TZA)

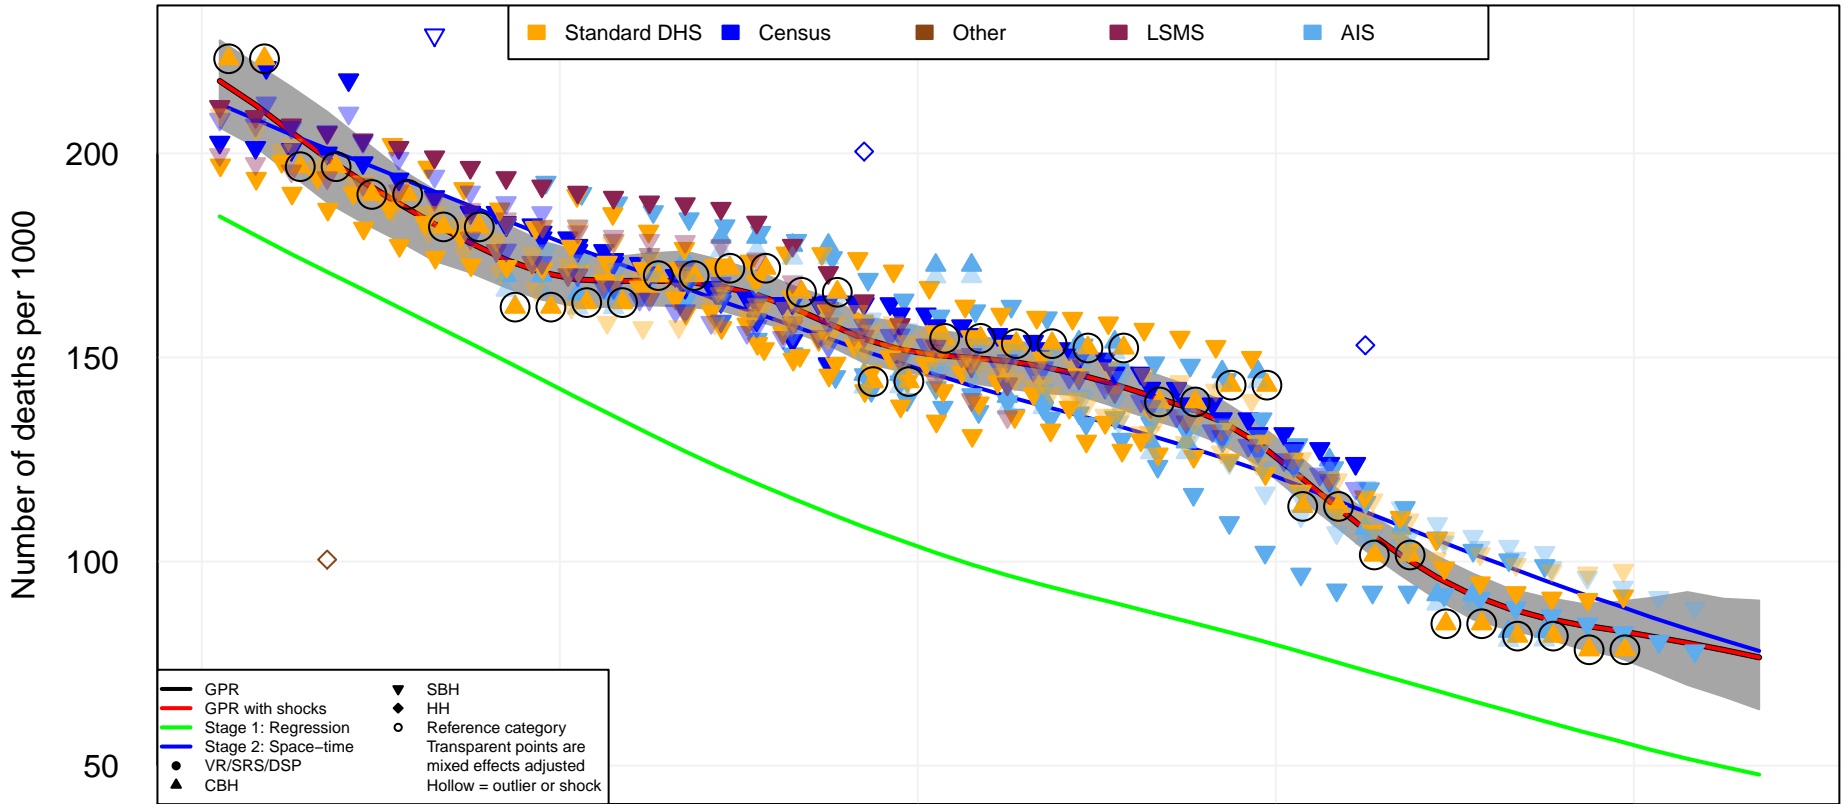

1970

1980

1990

2000

2010

Year

# sub-Saharan Africa, Eastern Uganda (UGA)

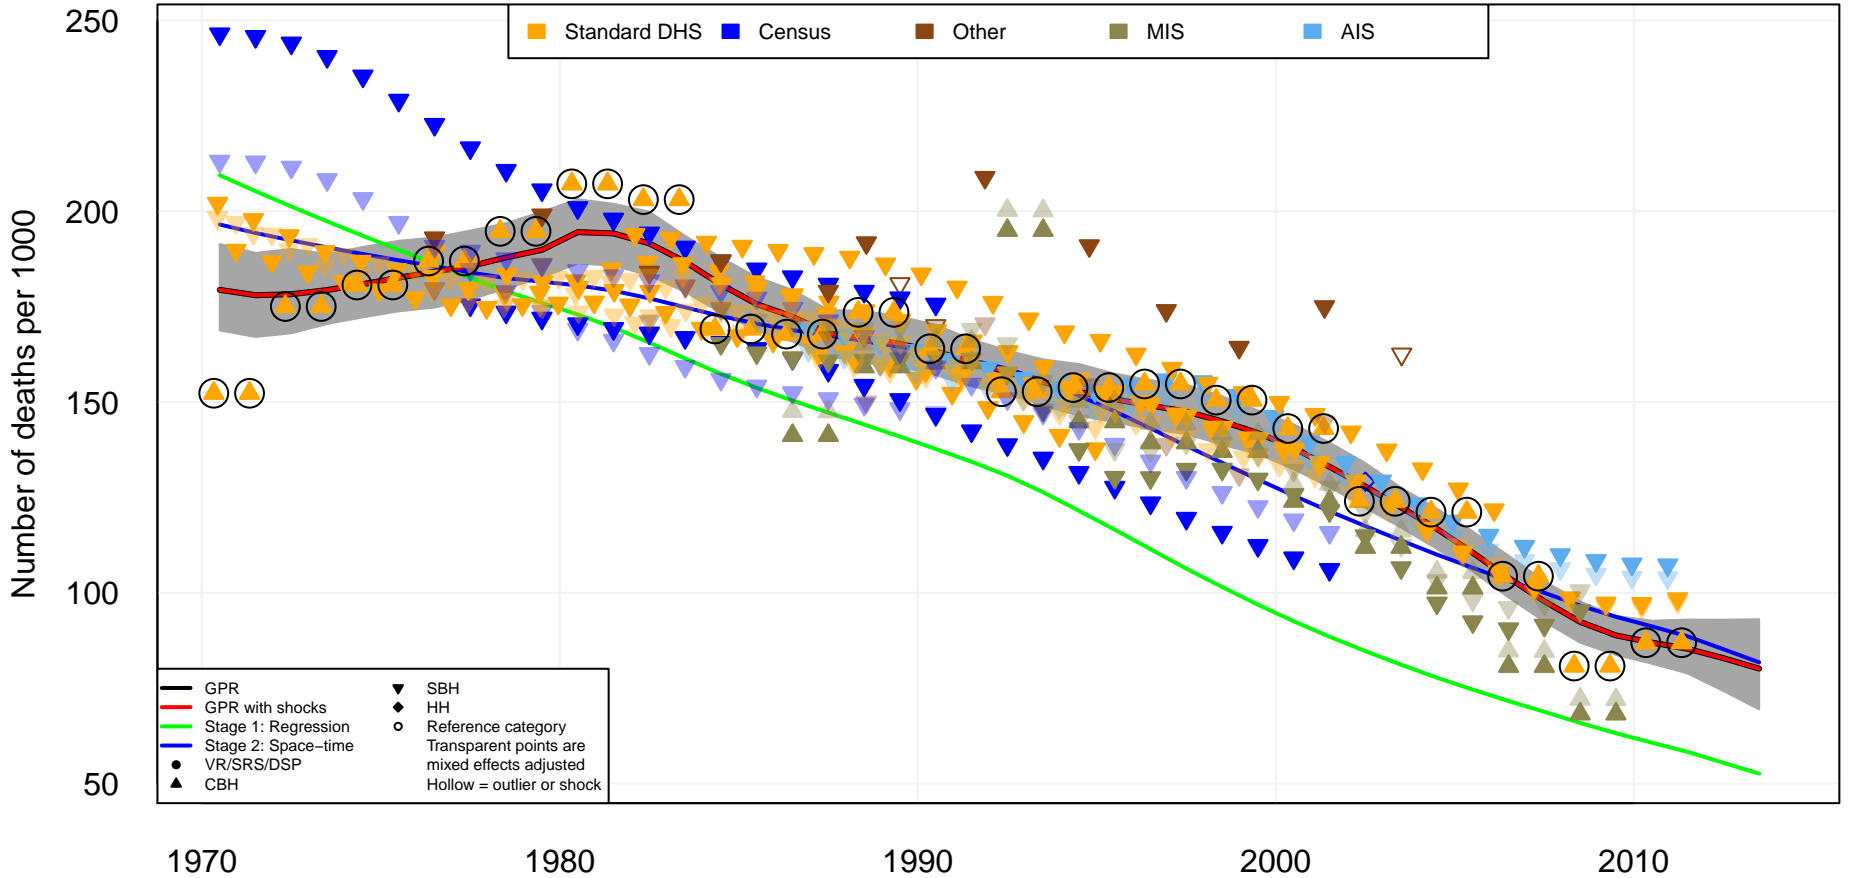

sub-Saharan Africa, Eastern  
Zambia (ZMB)

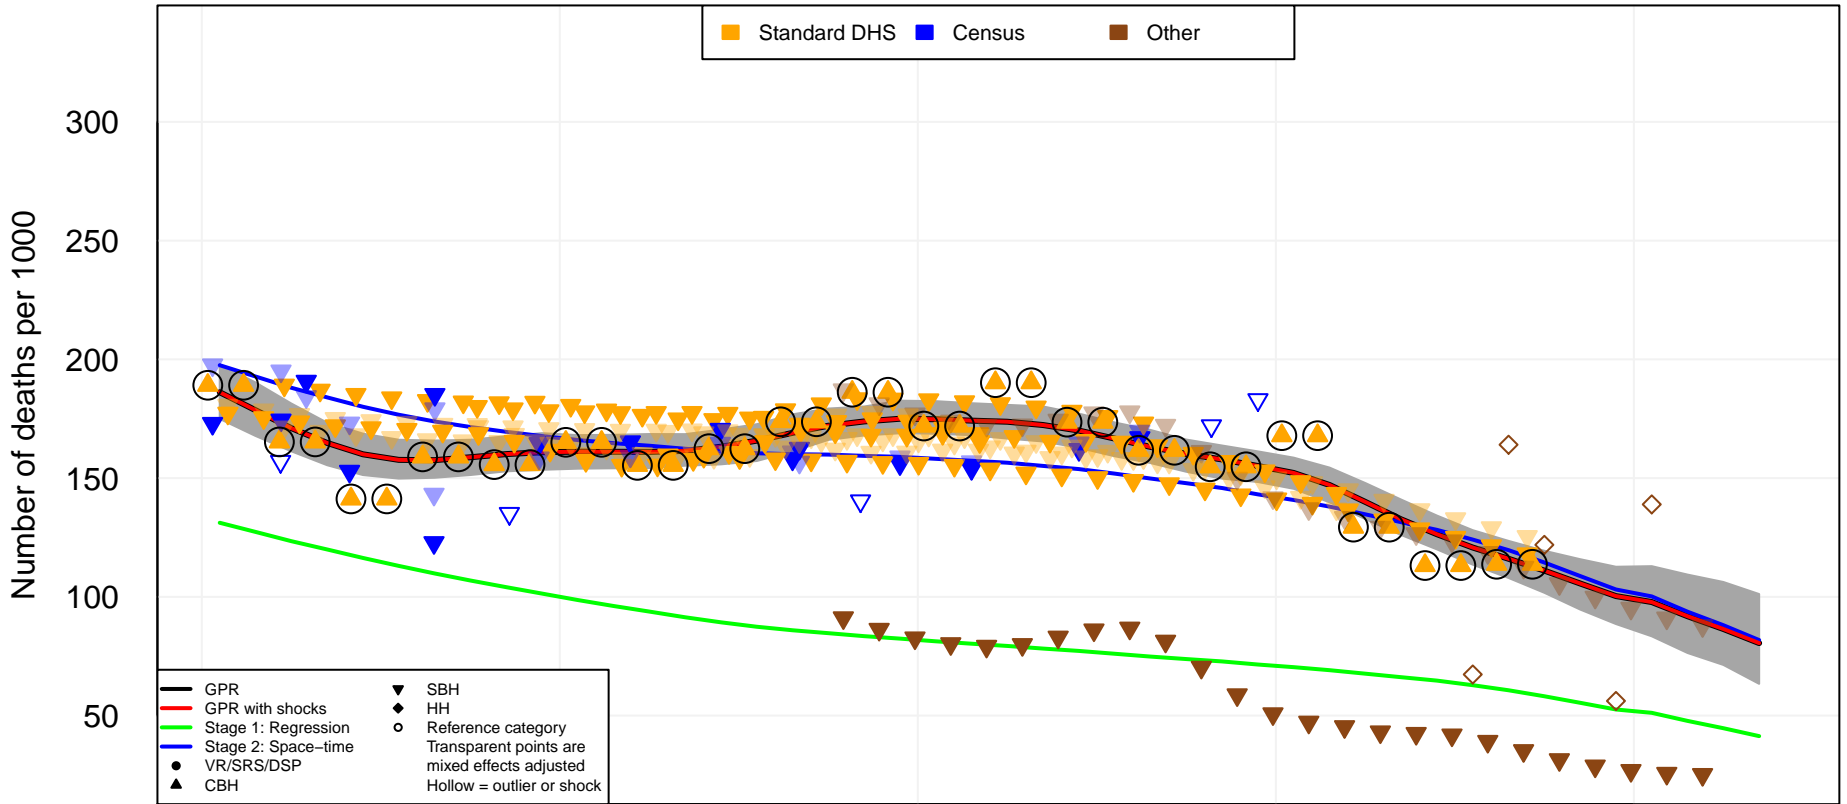

# sub-Saharan Africa, Southern Botswana (BWA)

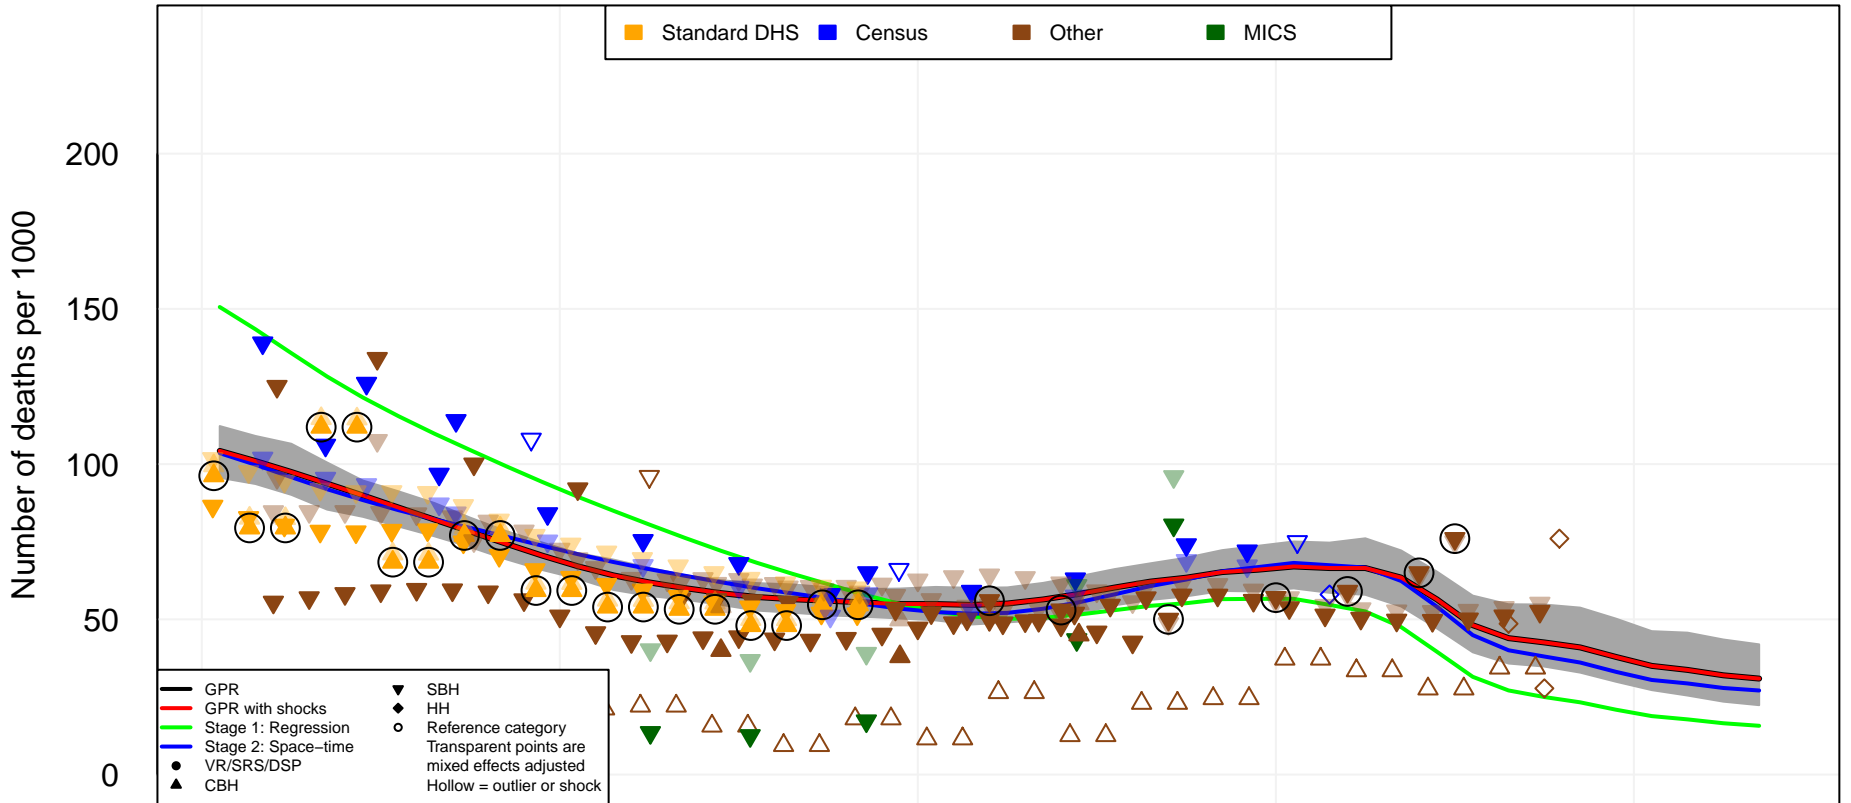

1970

1980

1990

2000

2010

Year



# sub-Saharan Africa, Southern Lesotho (LSO)

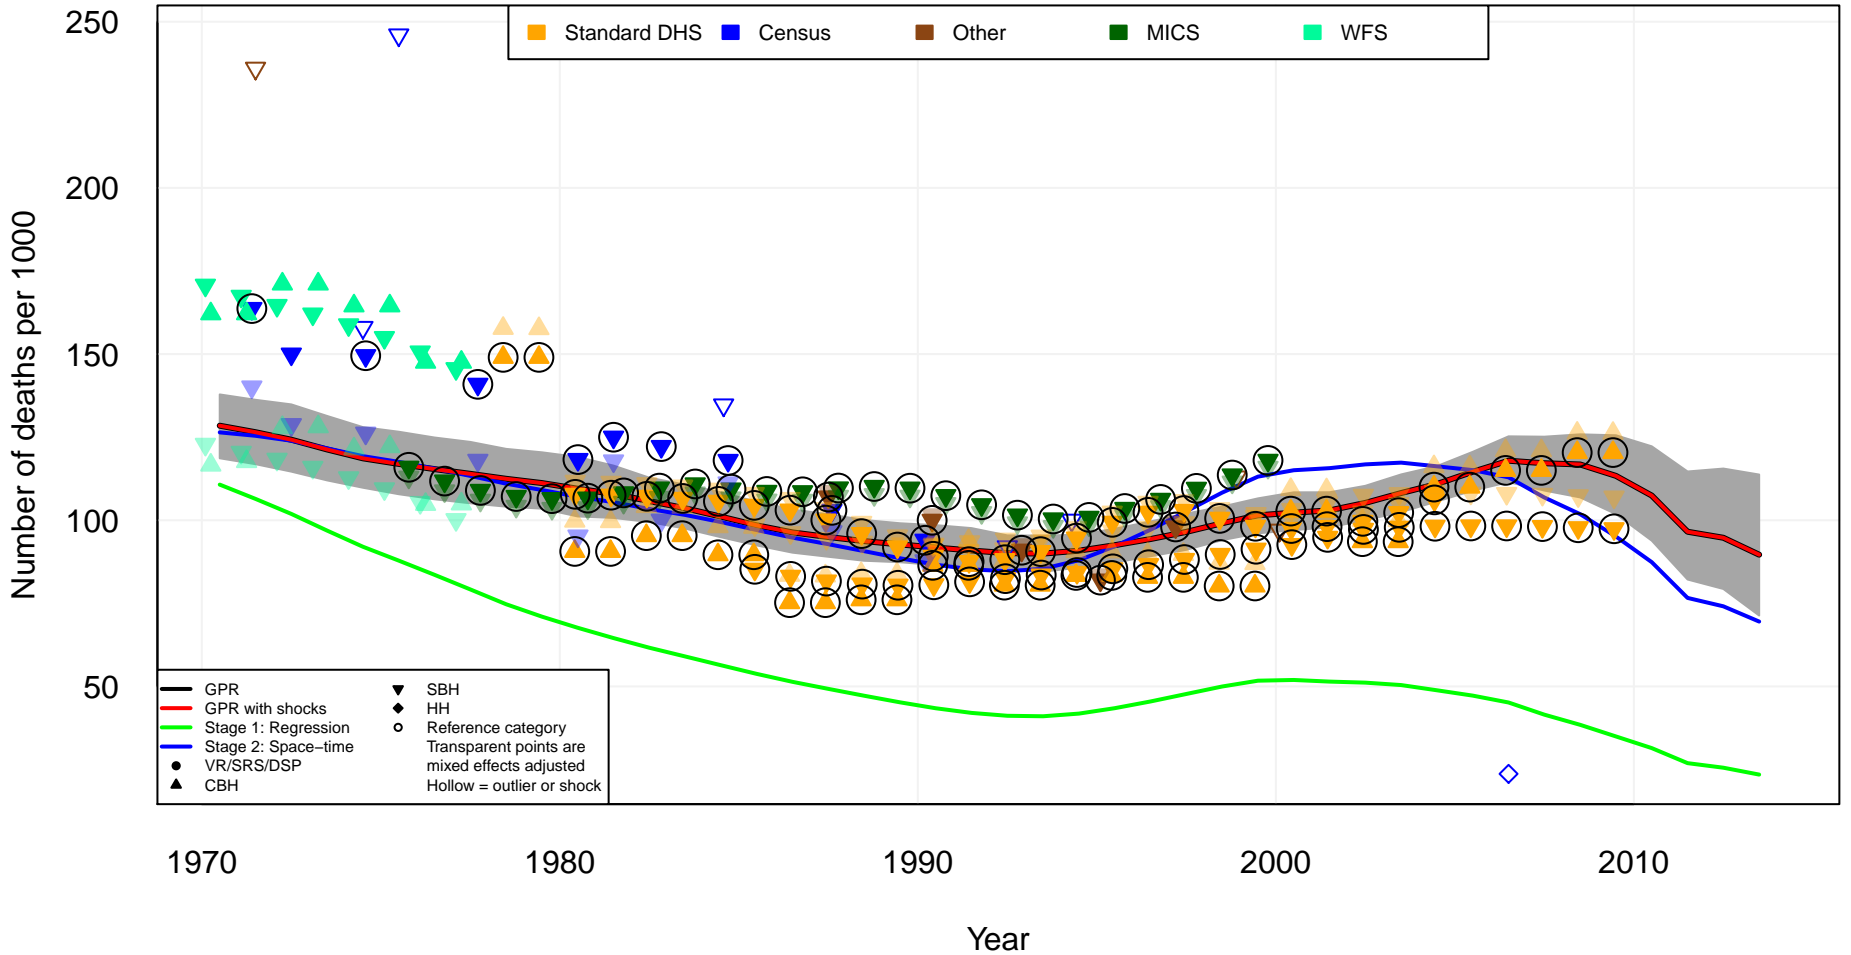

# sub-Saharan Africa, Southern Namibia (NAM)

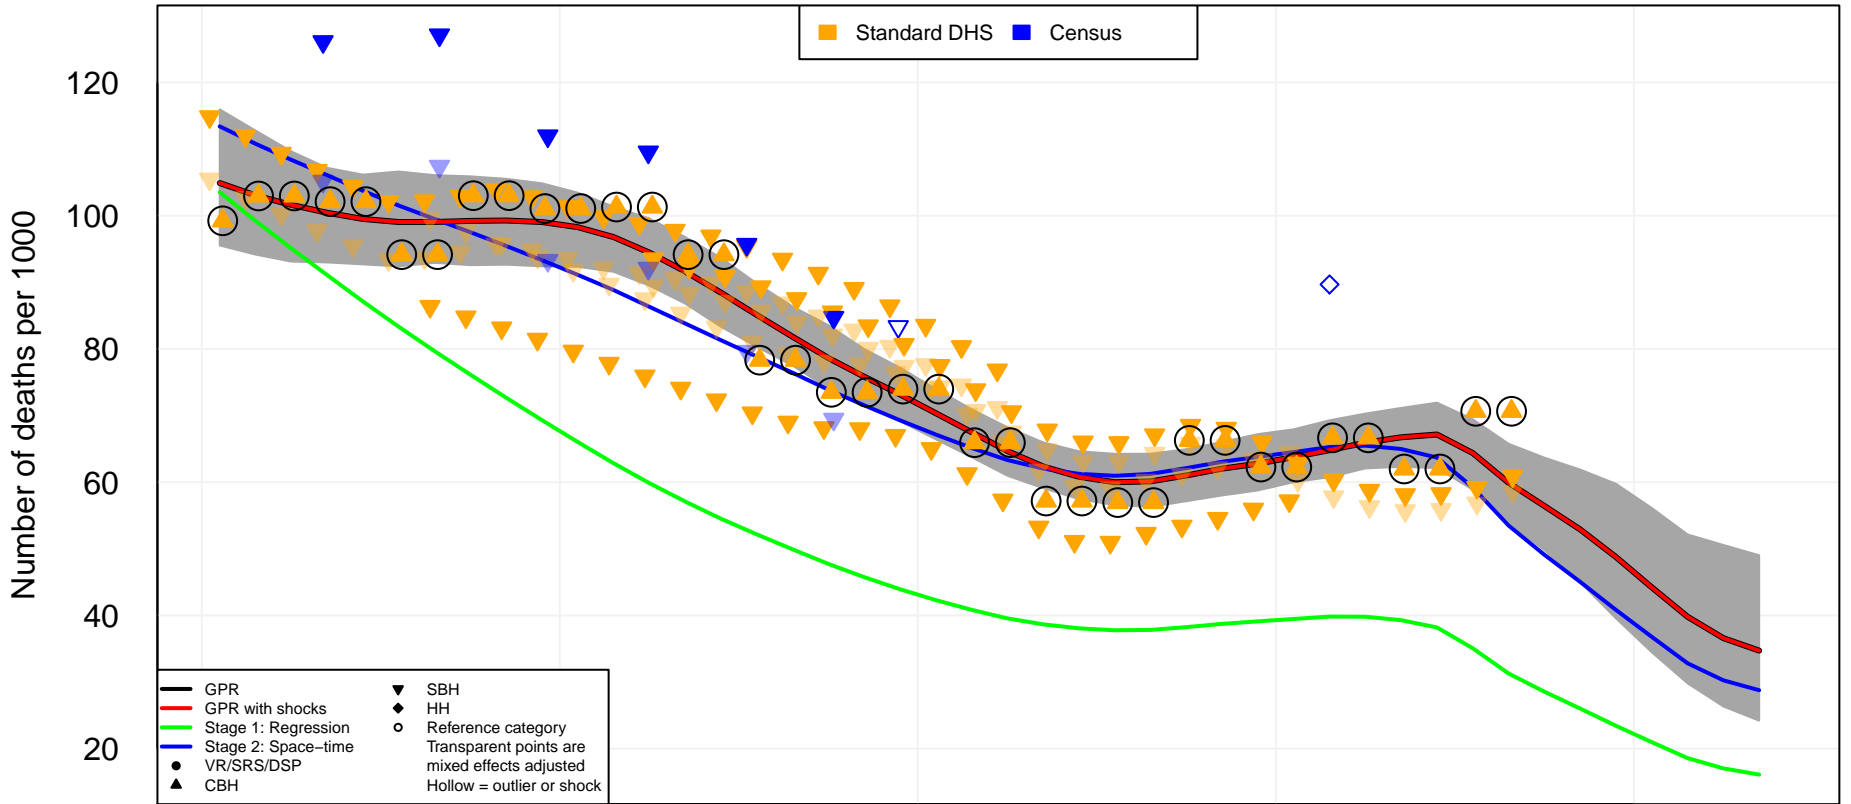

1970

1980

1990

2000

2010

Year

# sub-Saharan Africa, Southern Swaziland (SWZ)

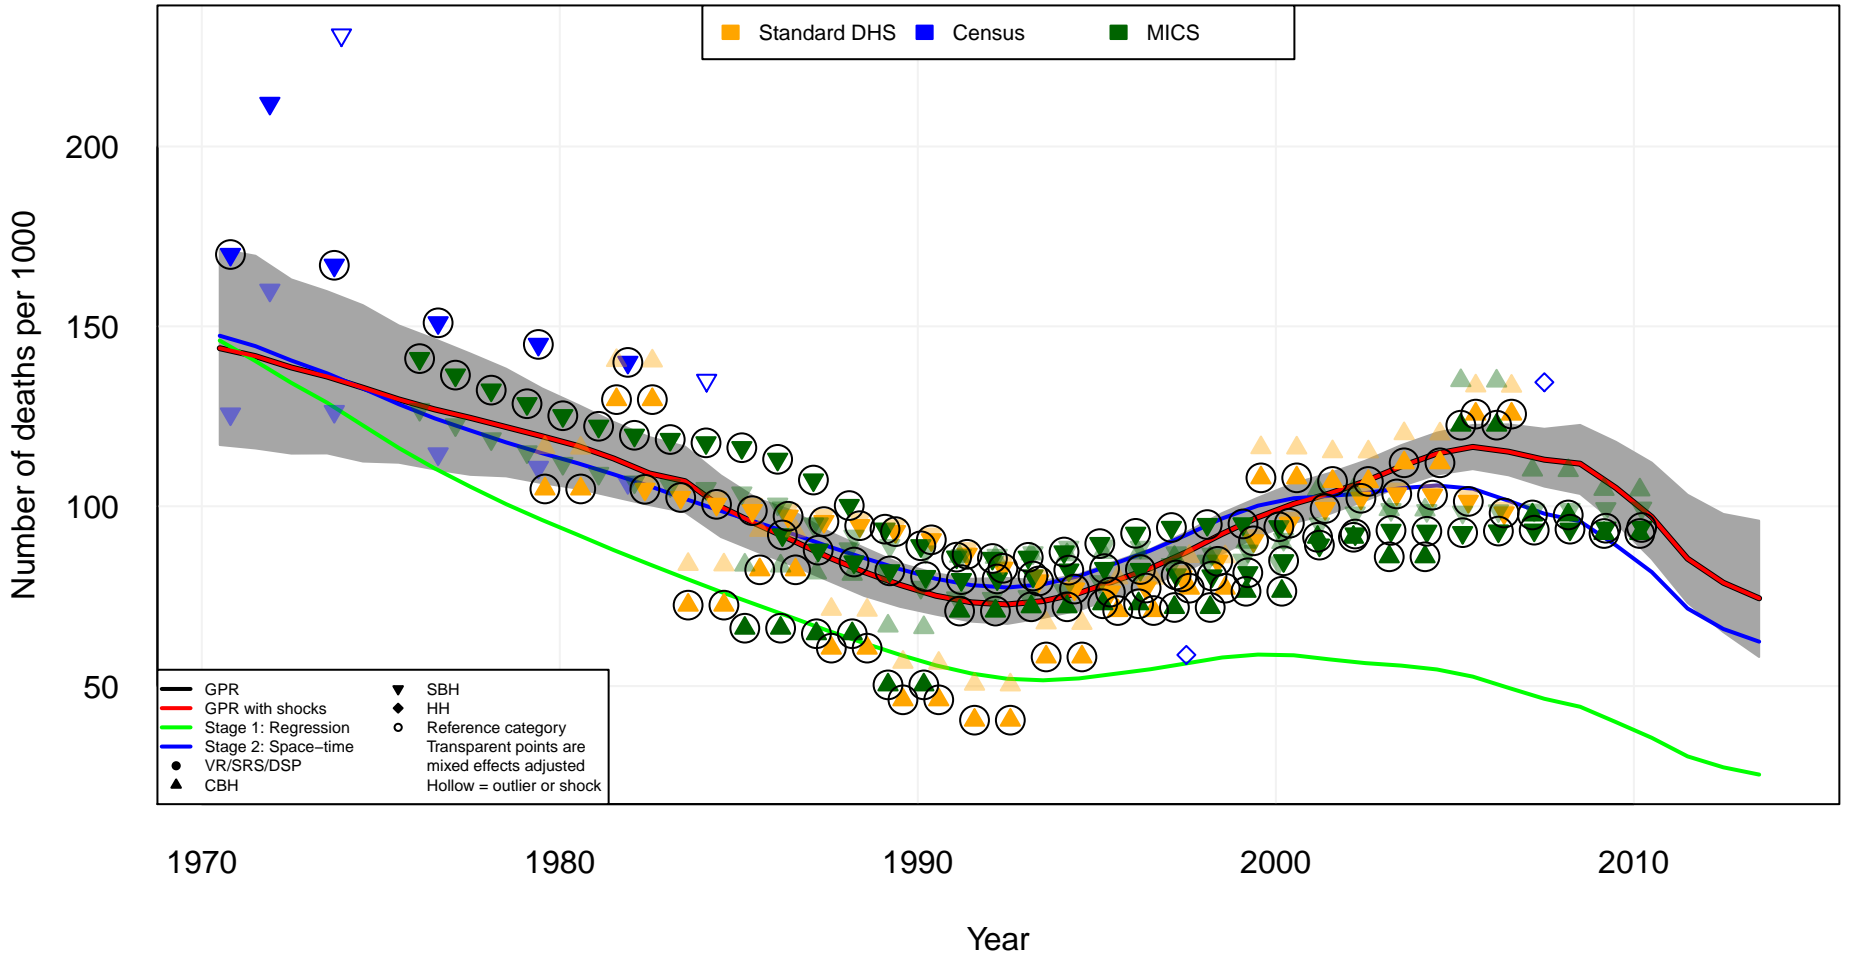

# sub-Saharan Africa, Southern South Africa (ZAF)

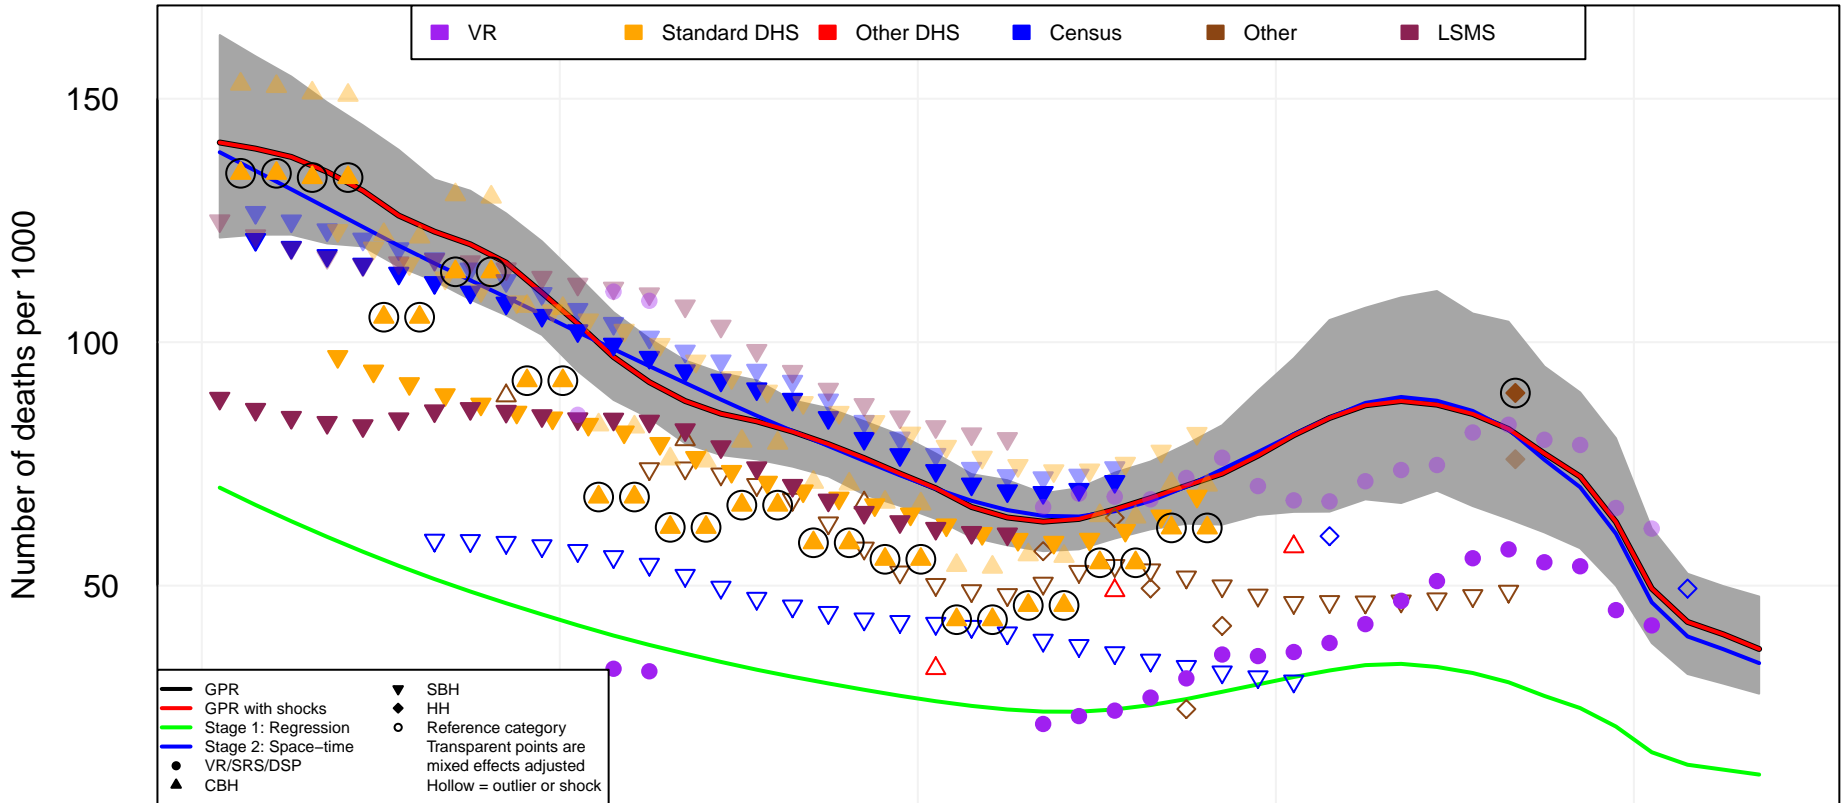

# sub-Saharan Africa, Southern Zimbabwe (ZWE)

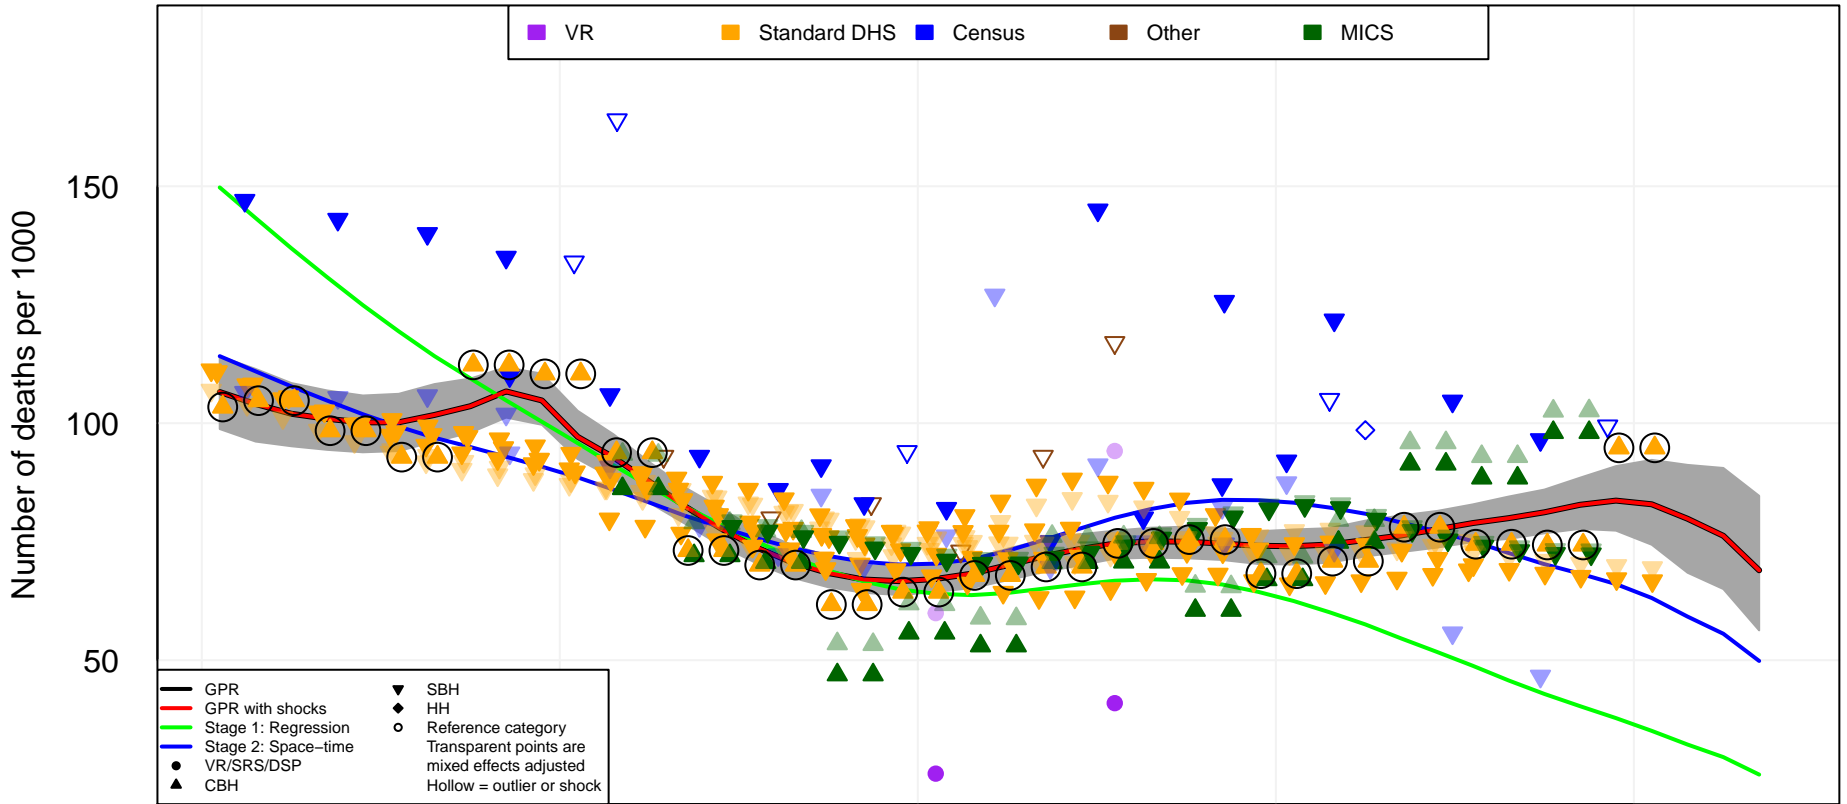

1970

1980

1990

2000

2010

Year

# sub-Saharan Africa, Western Benin (BEN)

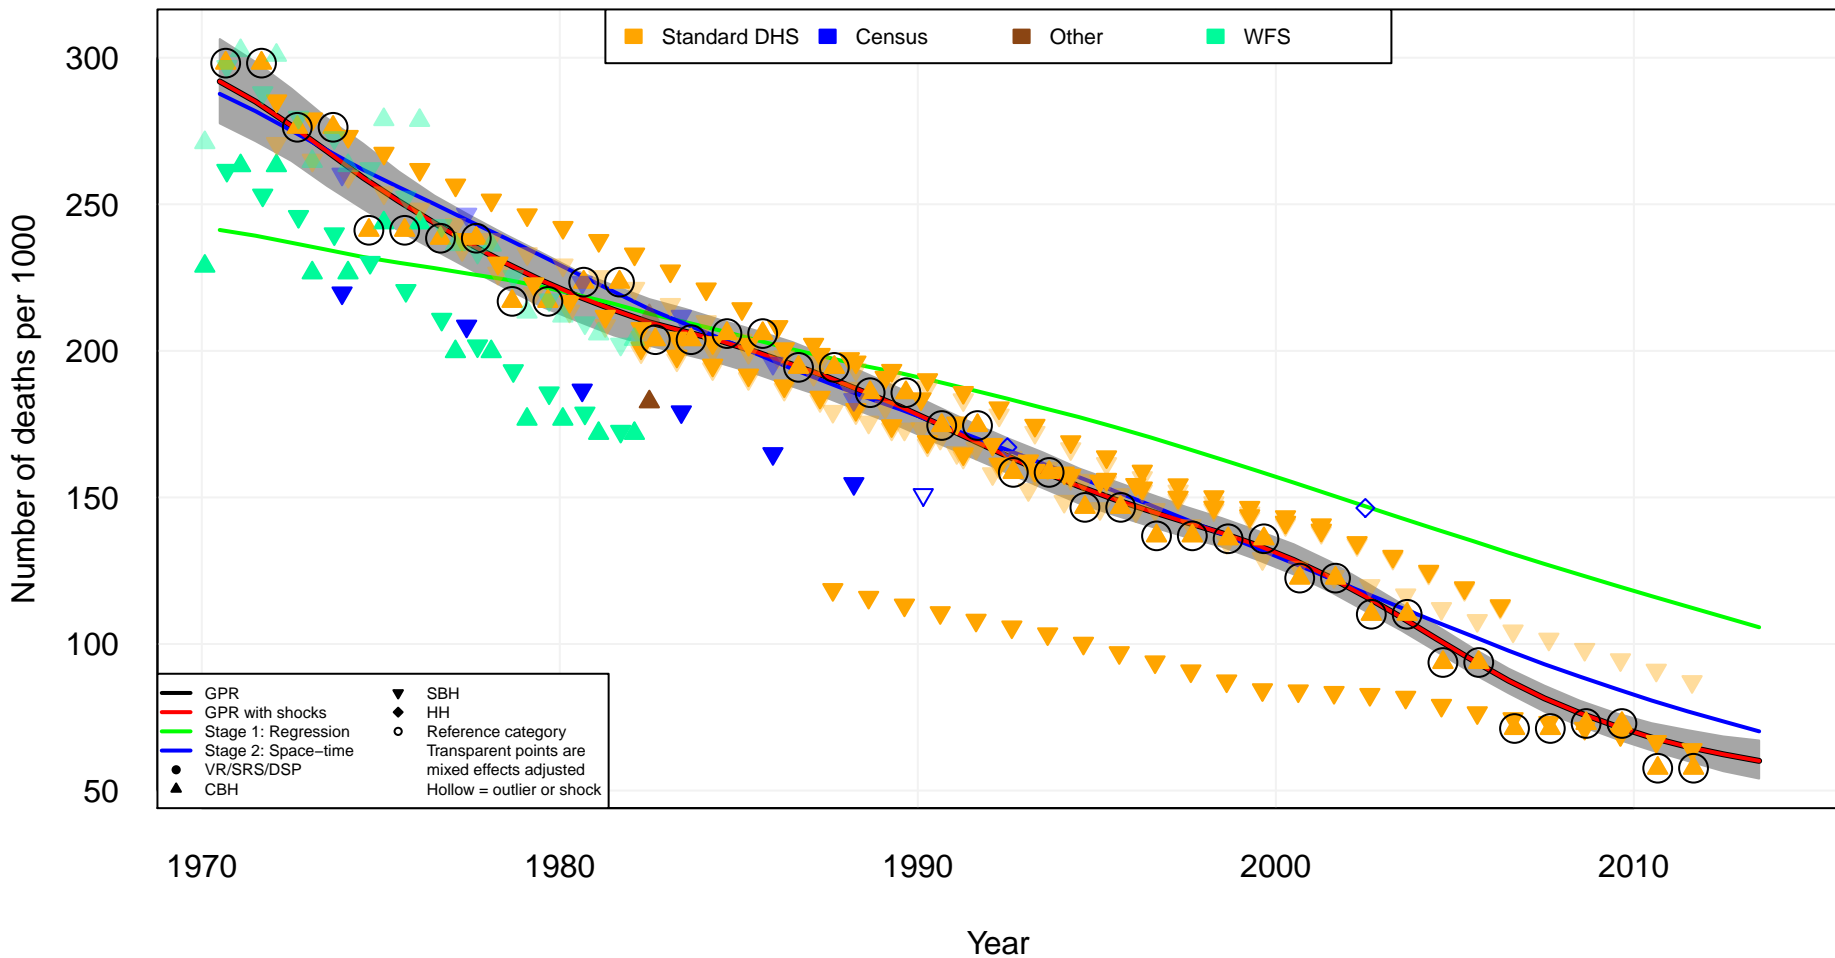

# sub-Saharan Africa, Western Burkina Faso (BFA)

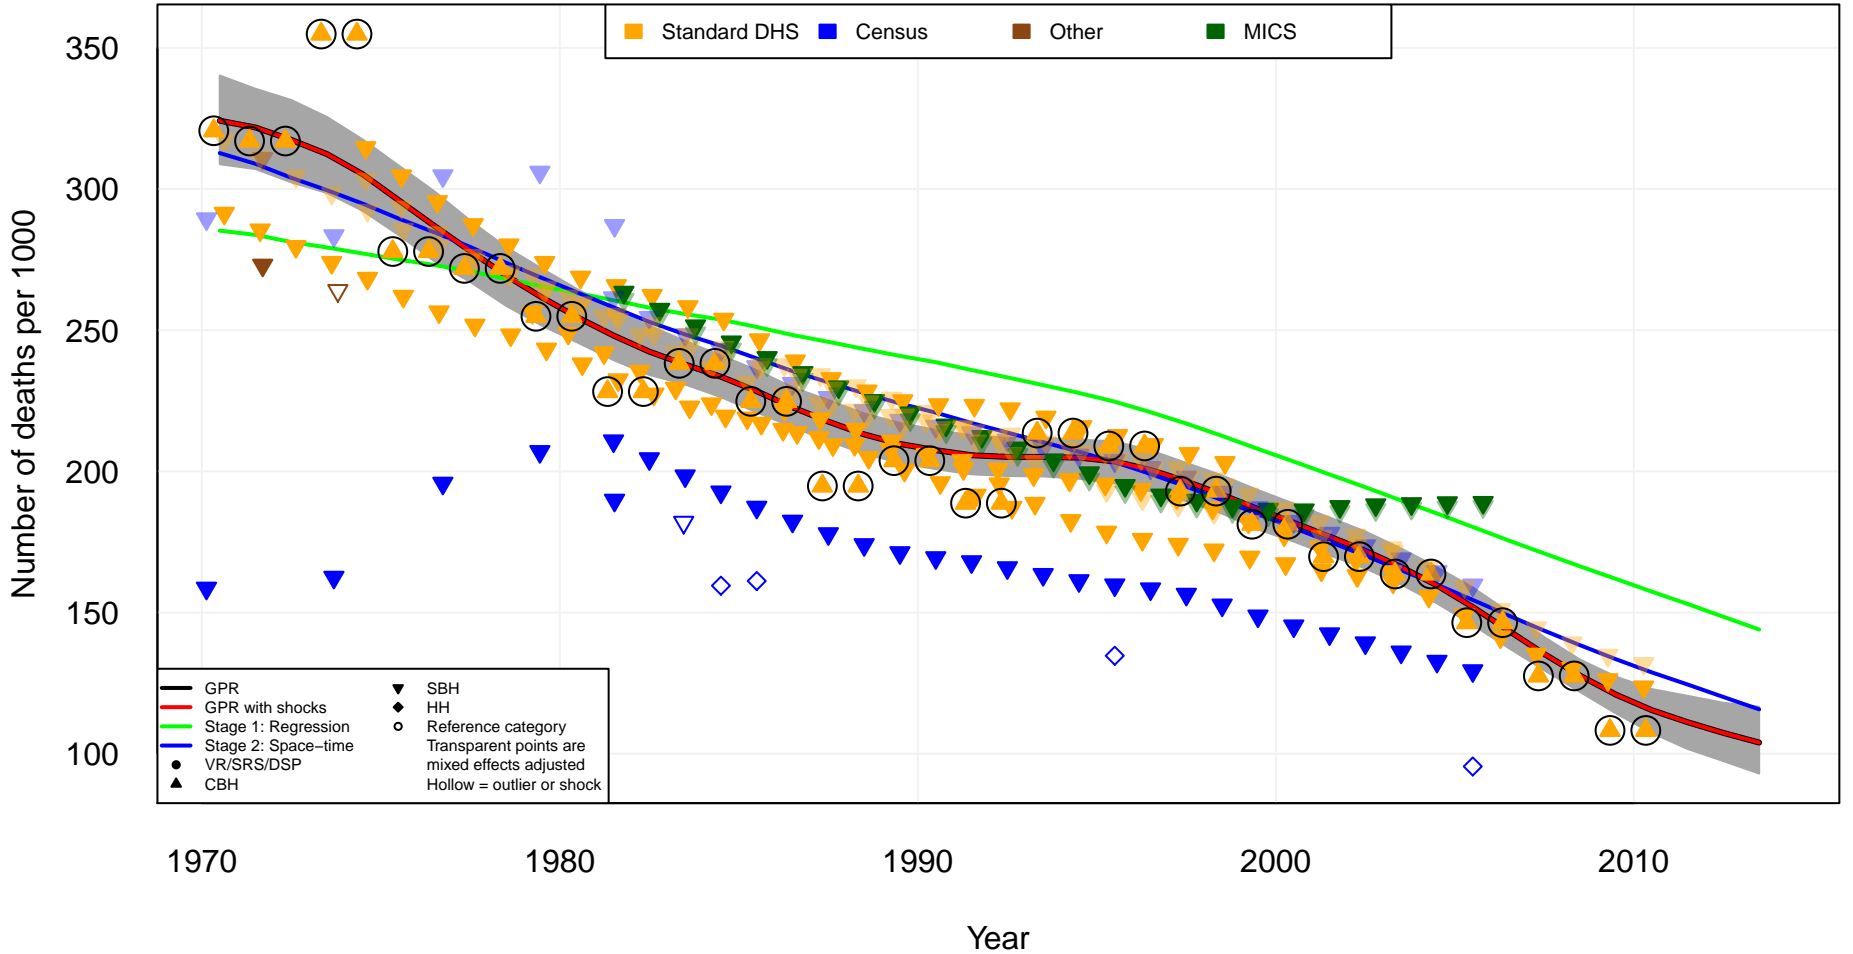

sub-Saharan Africa, Western  
Cote d'Ivoire (CIV)

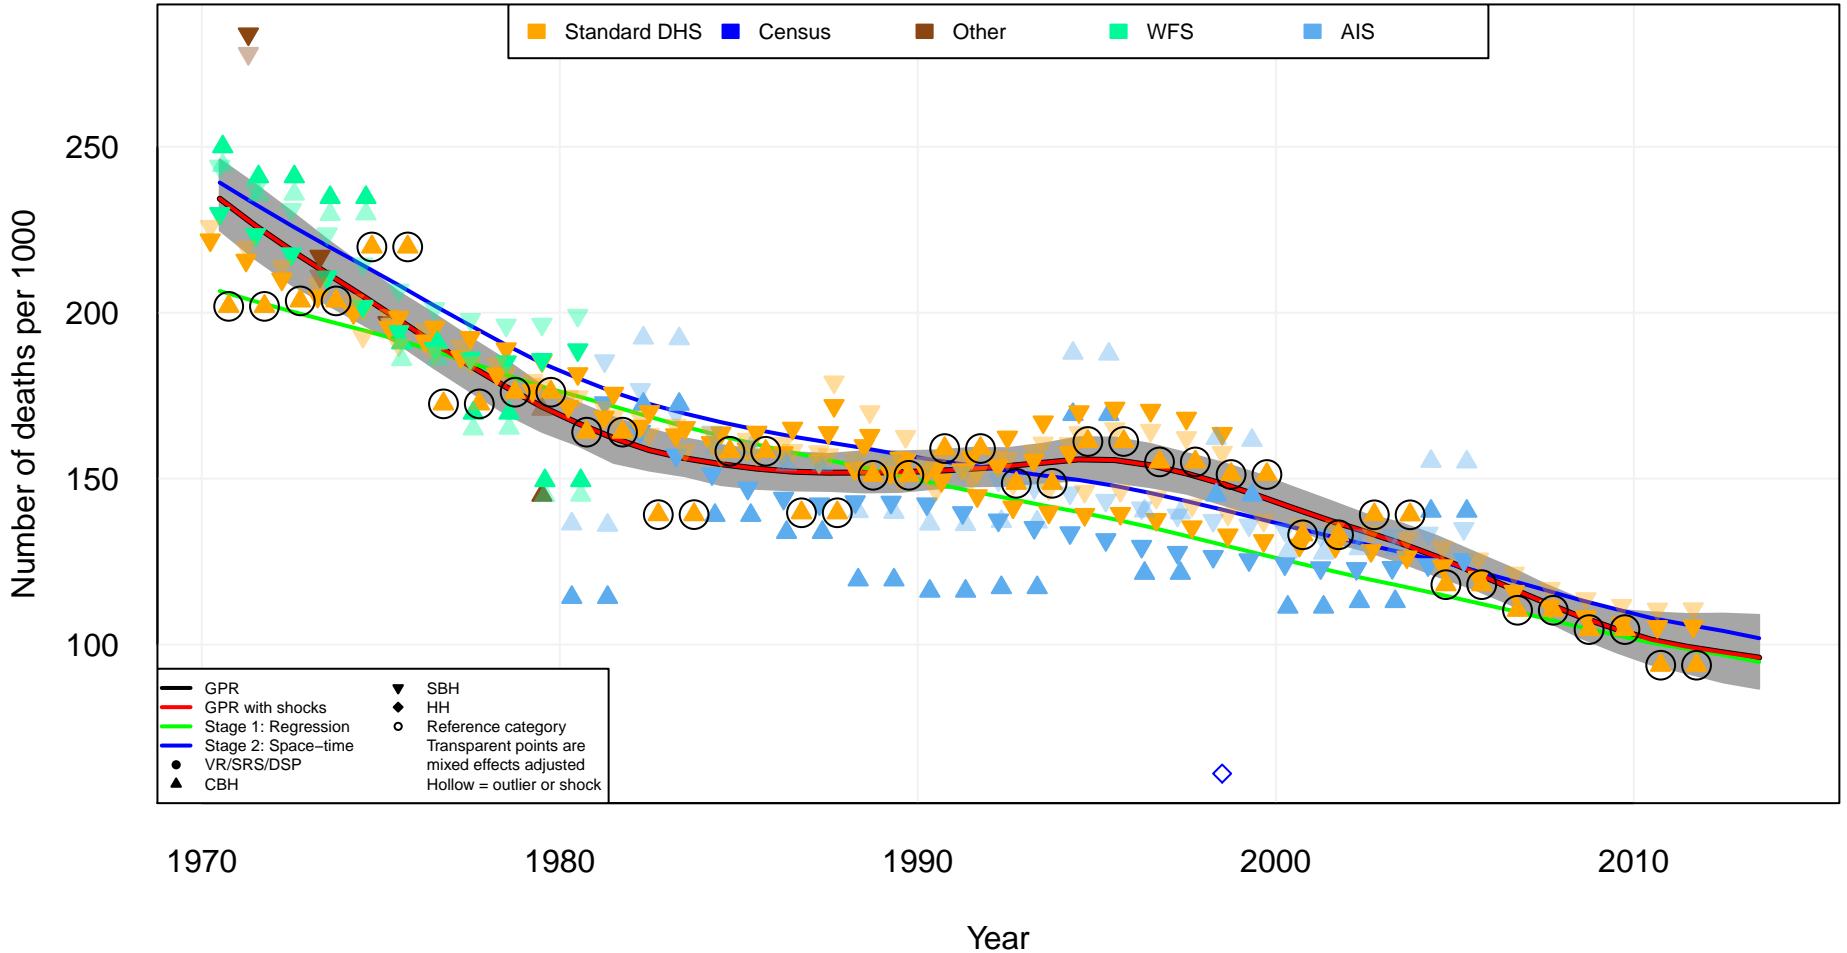



# sub-Saharan Africa, Western Cameroon (CMR)

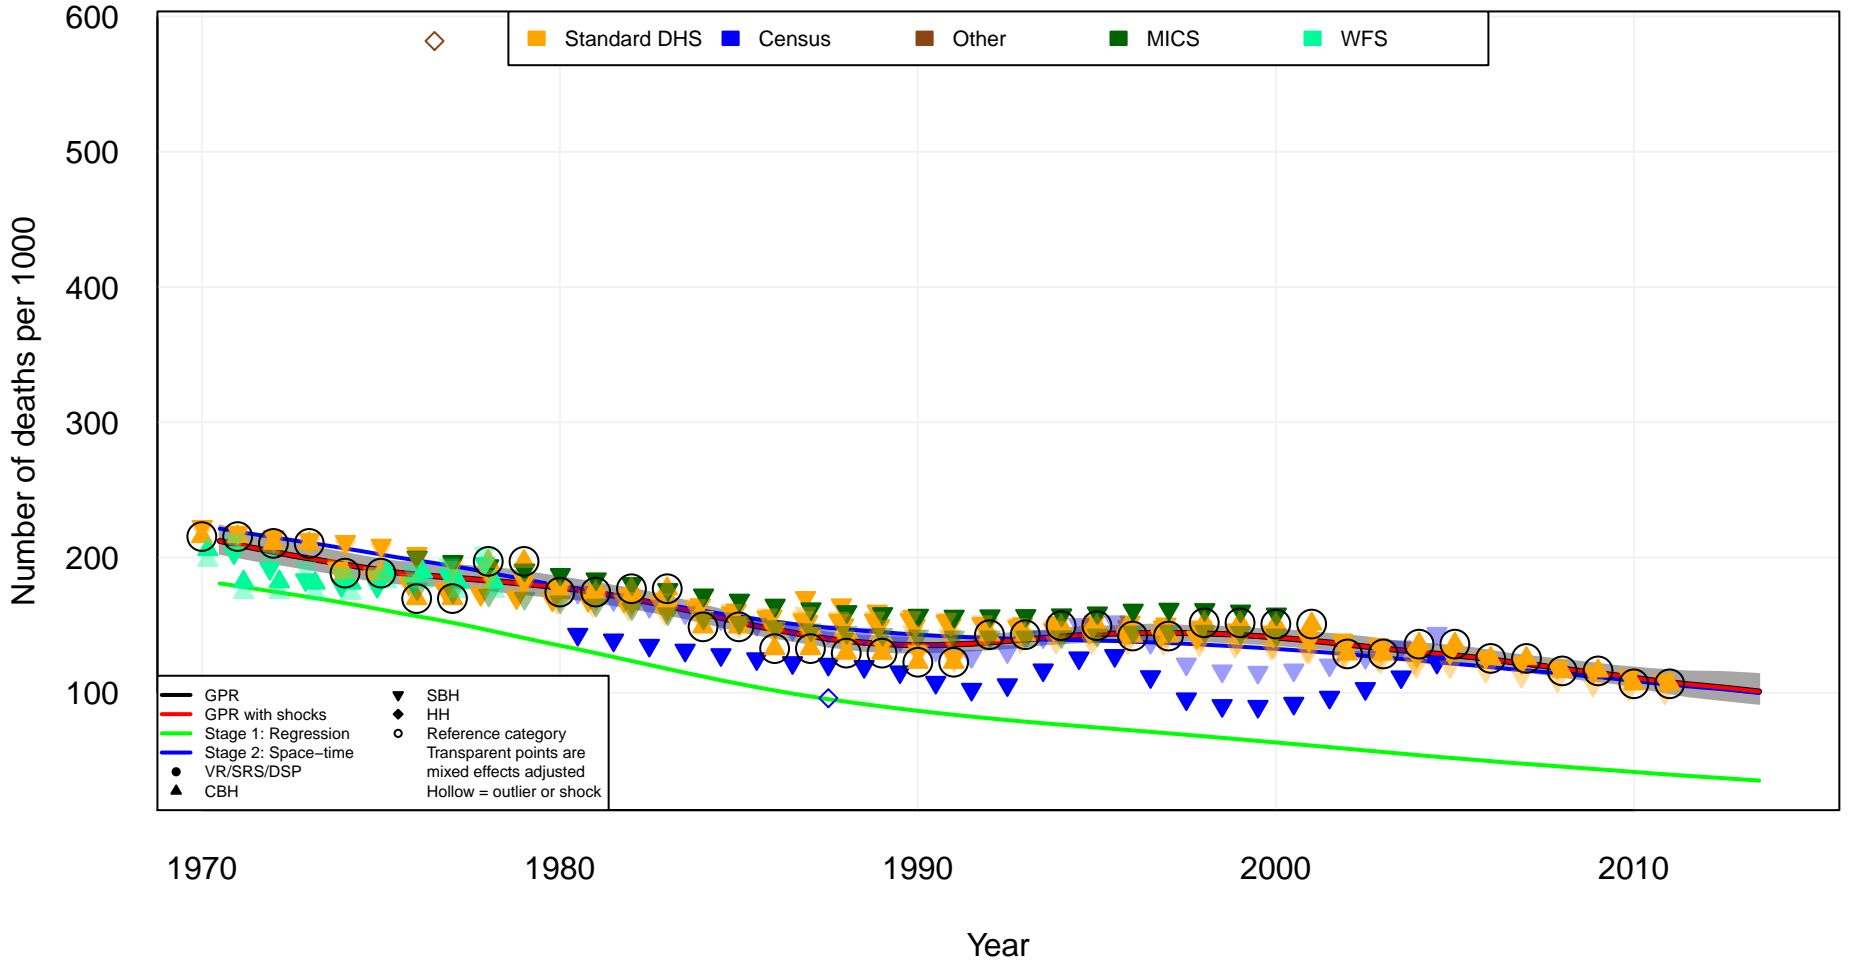

# sub-Saharan Africa, Western Cape Verde (CPV)

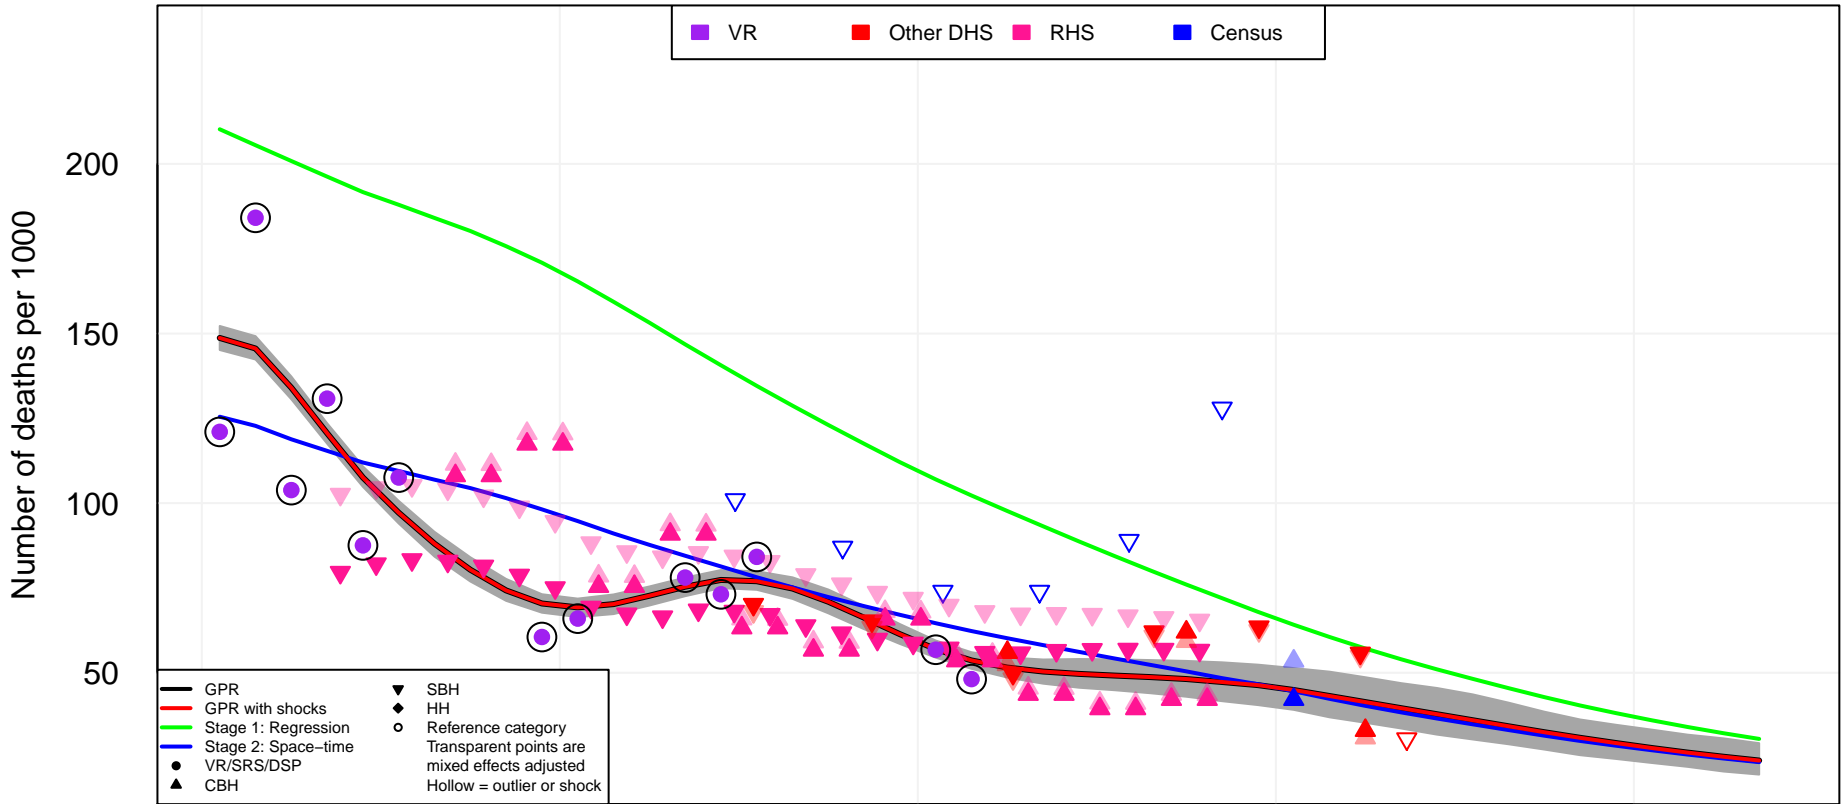

1970

1980

1990

2000

2010

Year

# sub-Saharan Africa, Western Ghana (GHA)

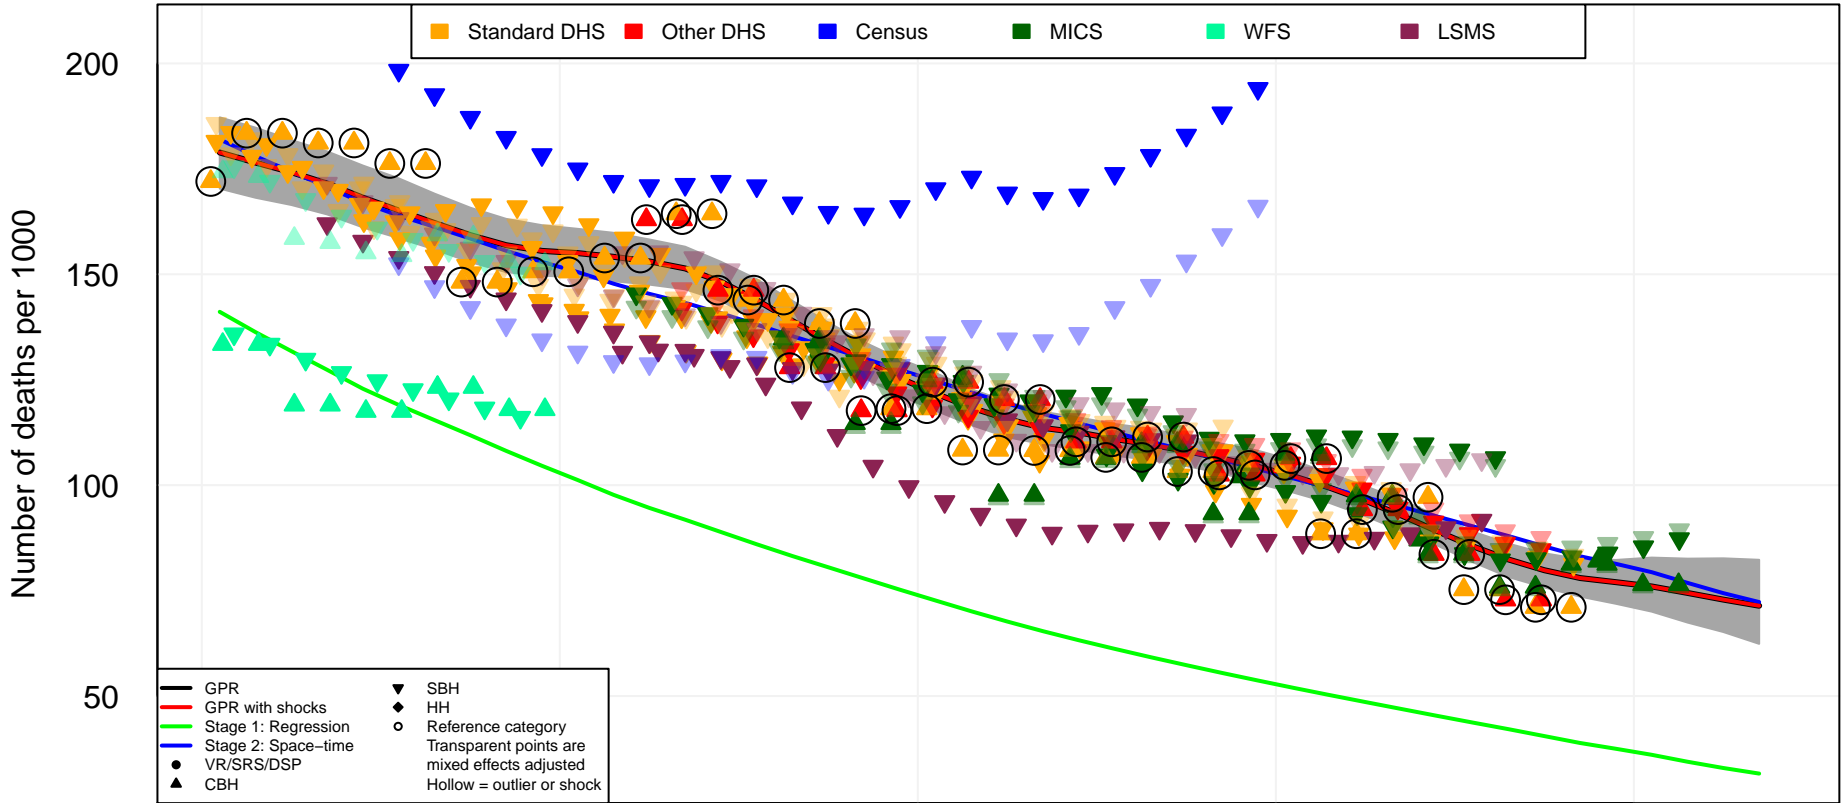

1970

1980

1990

2000

2010

Year

# sub-Saharan Africa, Western Guinea (GIN)

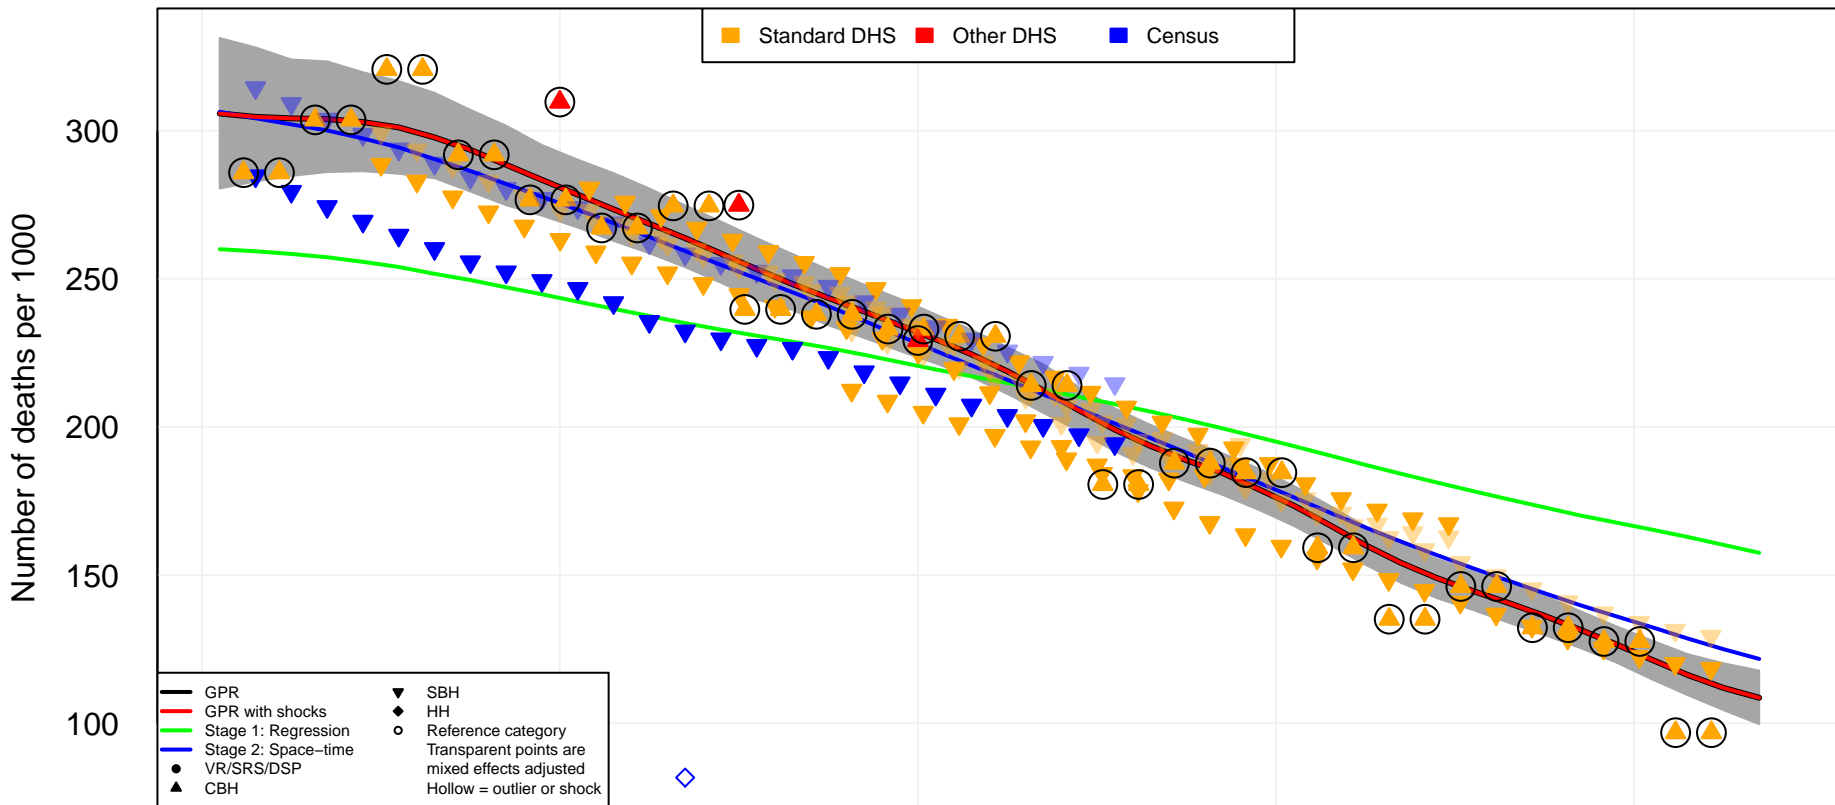

1970

1980

1990

2000

2010

Year

# sub-Saharan Africa, Western The Gambia (GMB)

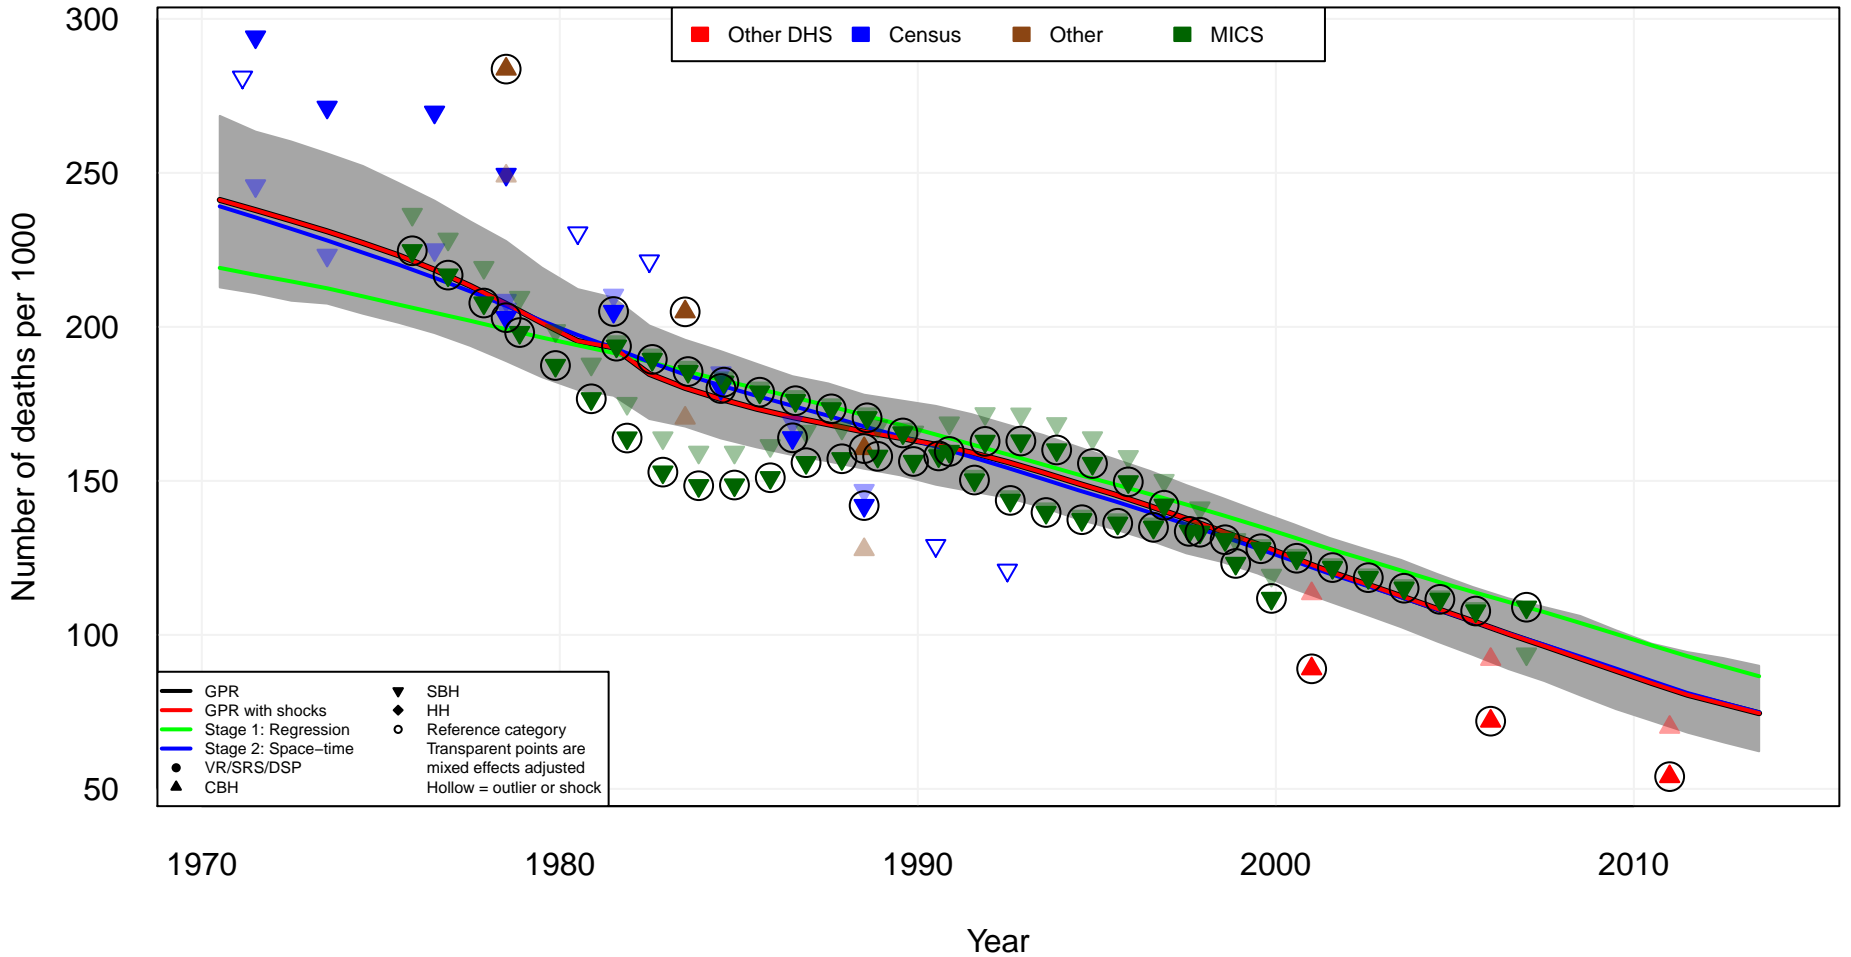

# sub-Saharan Africa, Western Guinea-Bissau (GNB)

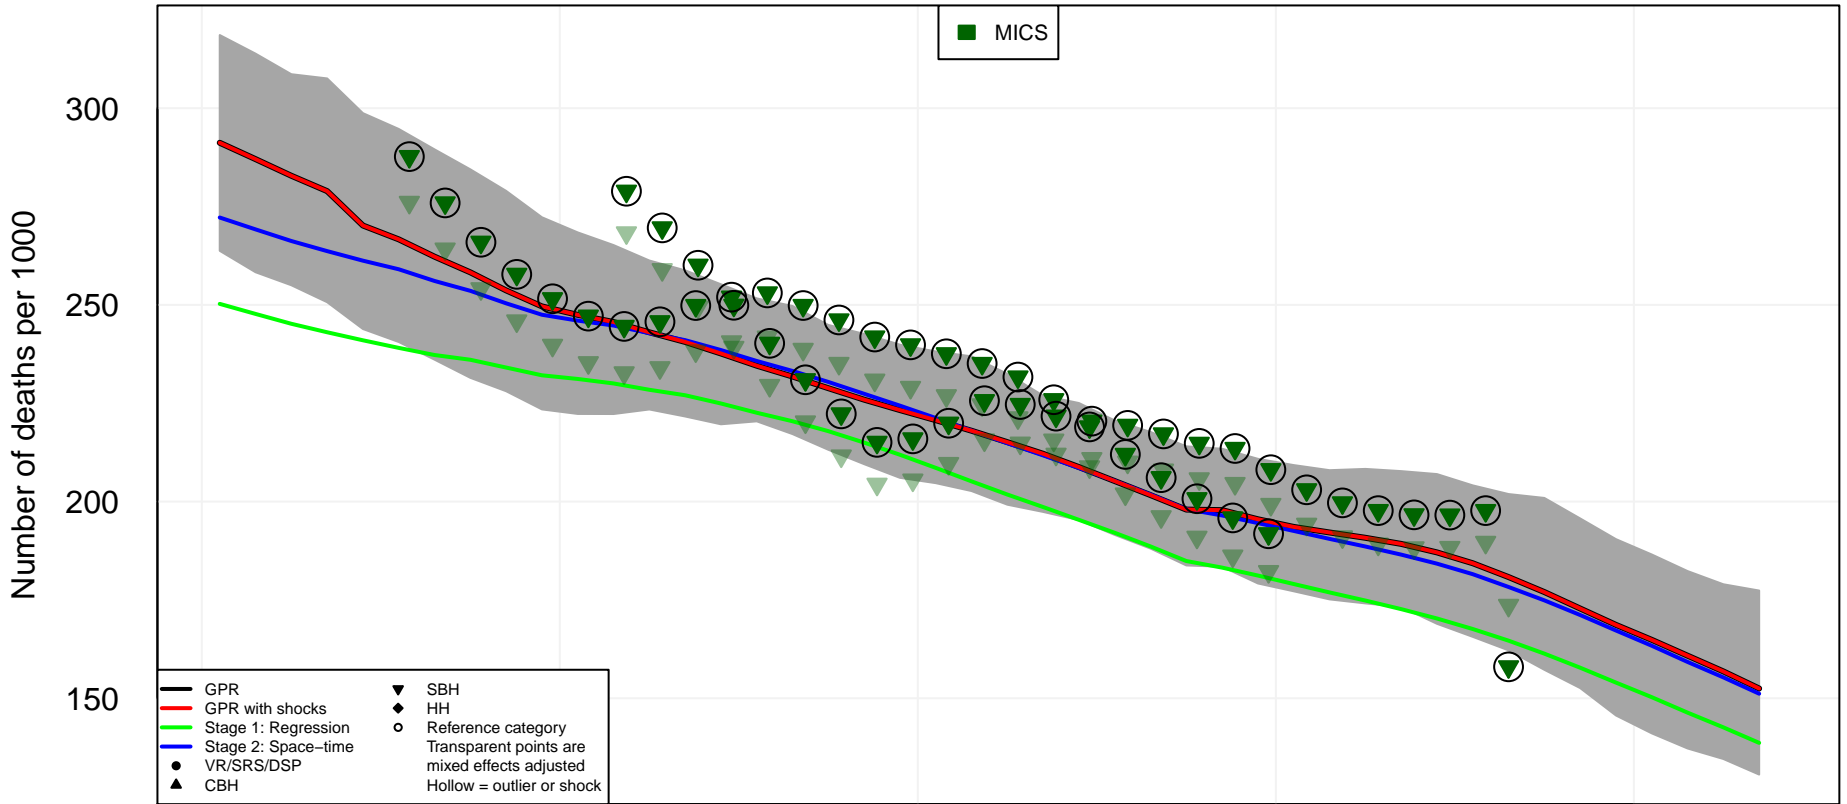

1970

1980

1990

2000

2010

Year

# sub-Saharan Africa, Western Liberia (LBR)

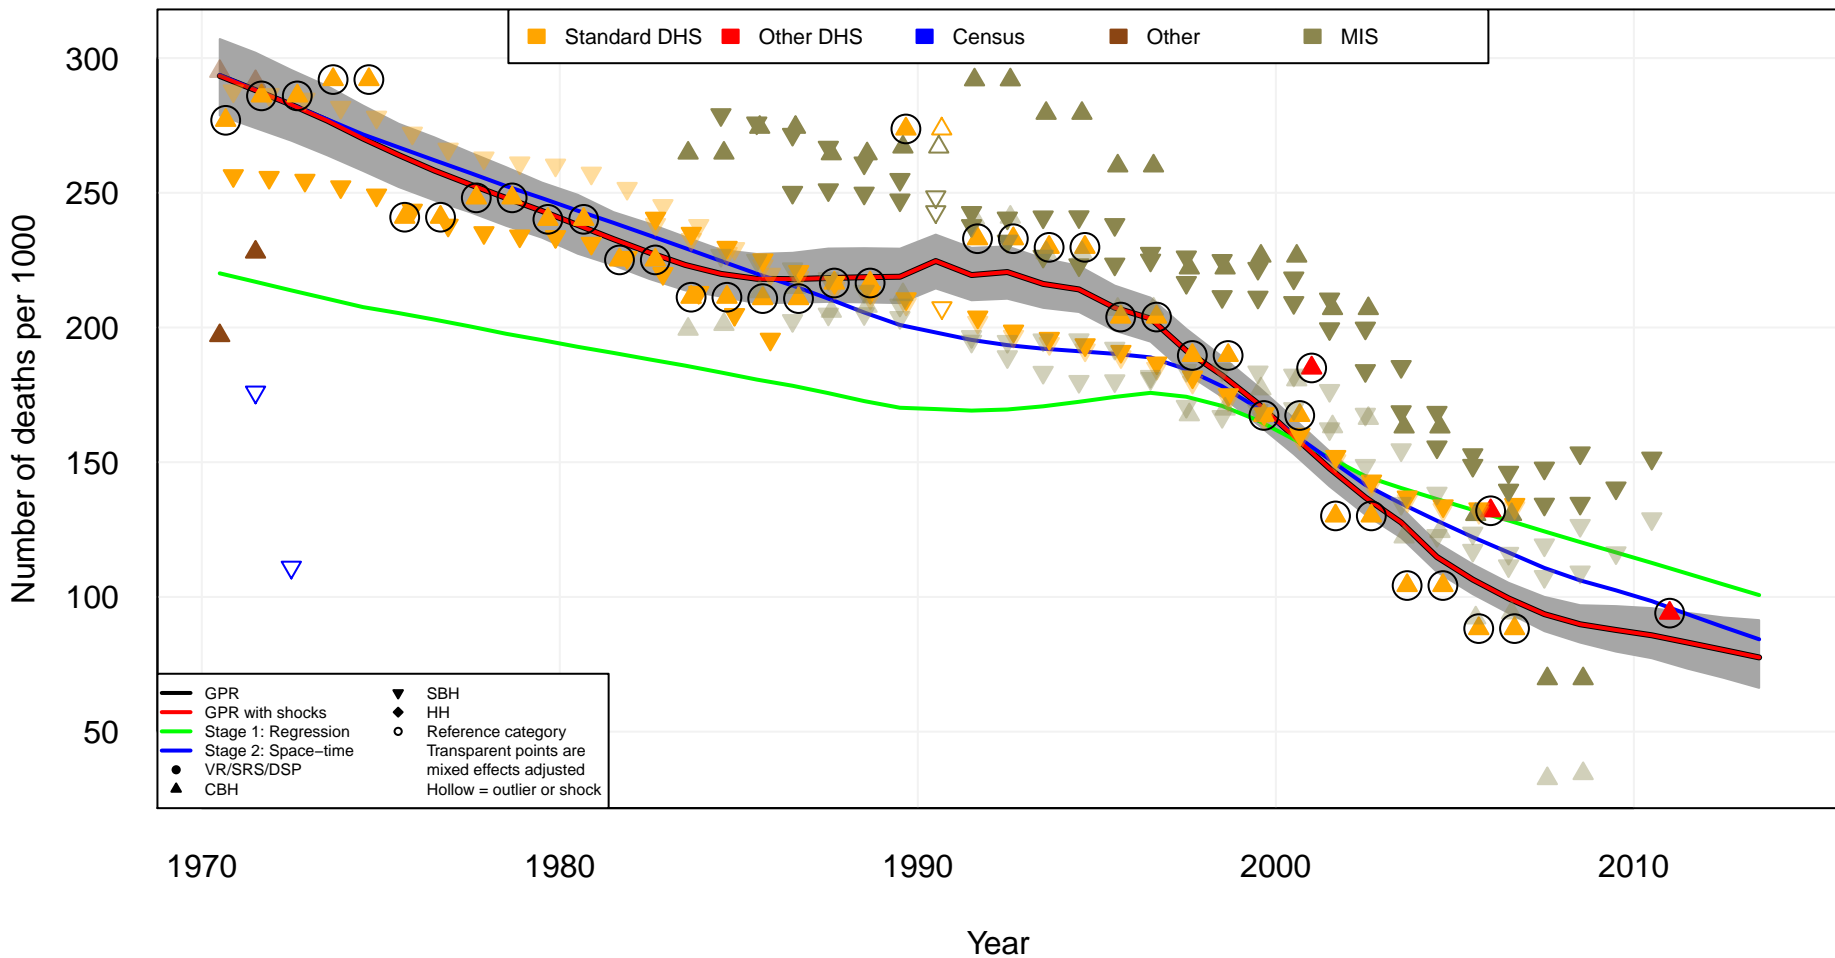

# sub-Saharan Africa, Western Mali (MLI)

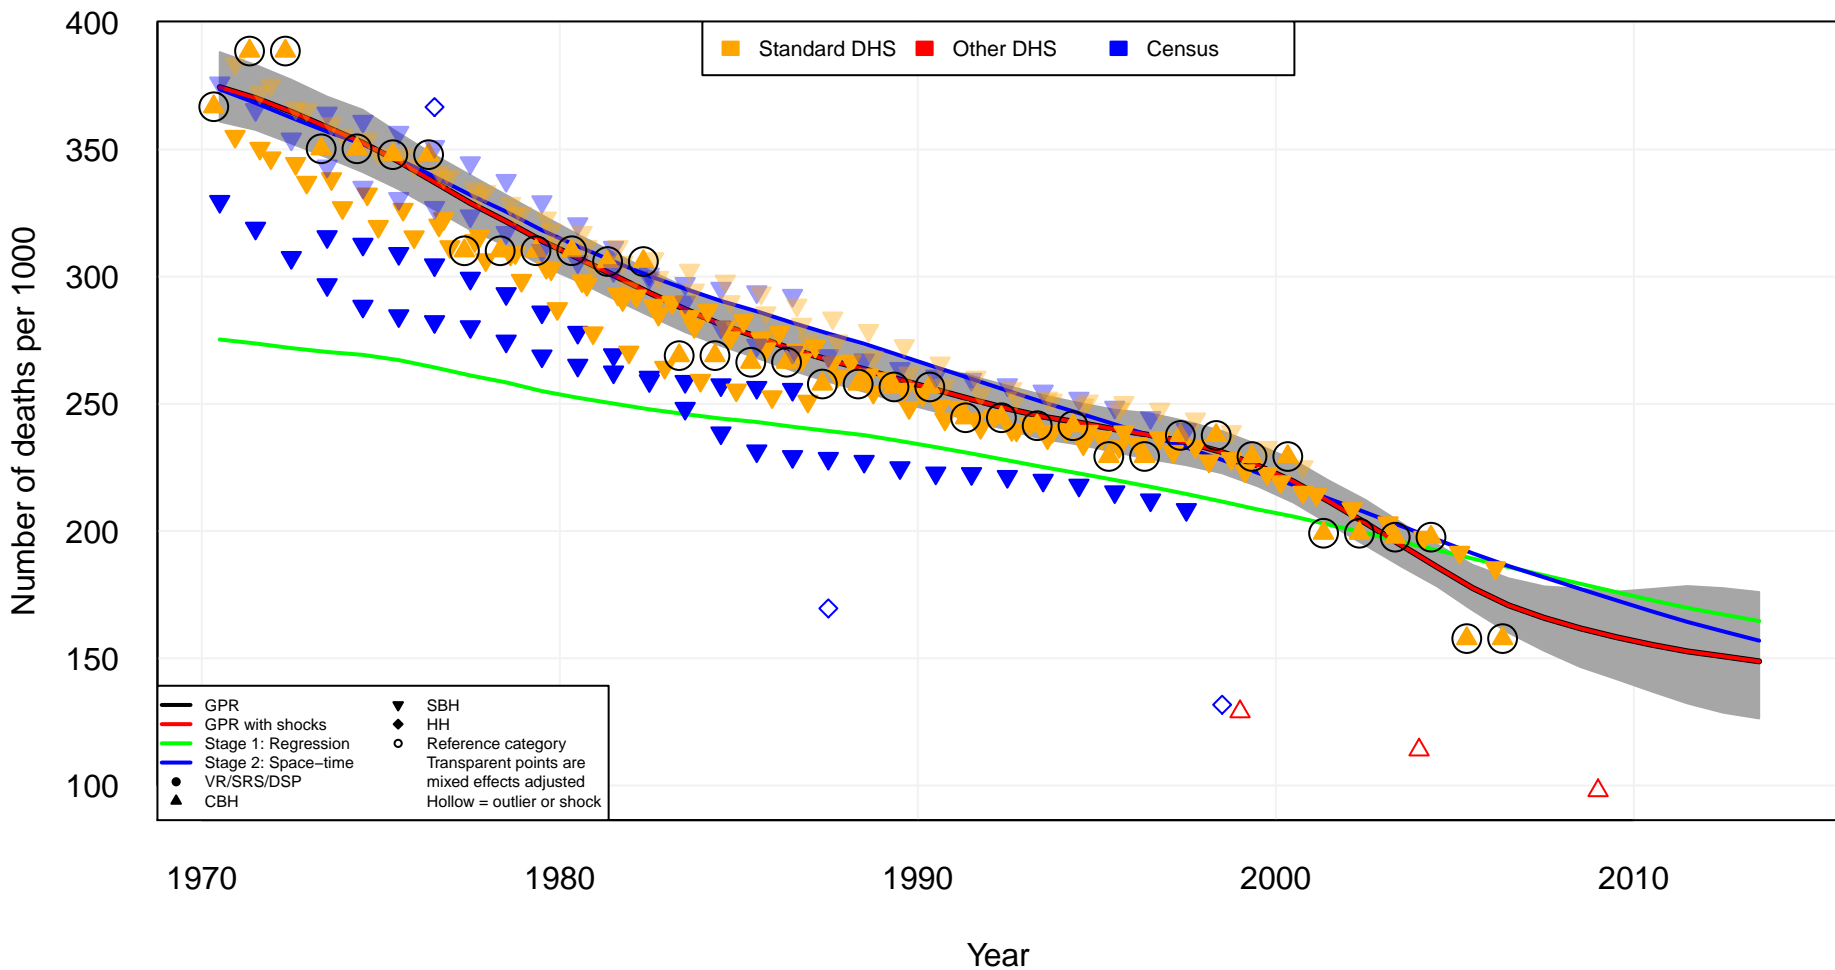



# sub-Saharan Africa, Western Mauritania (MRT)

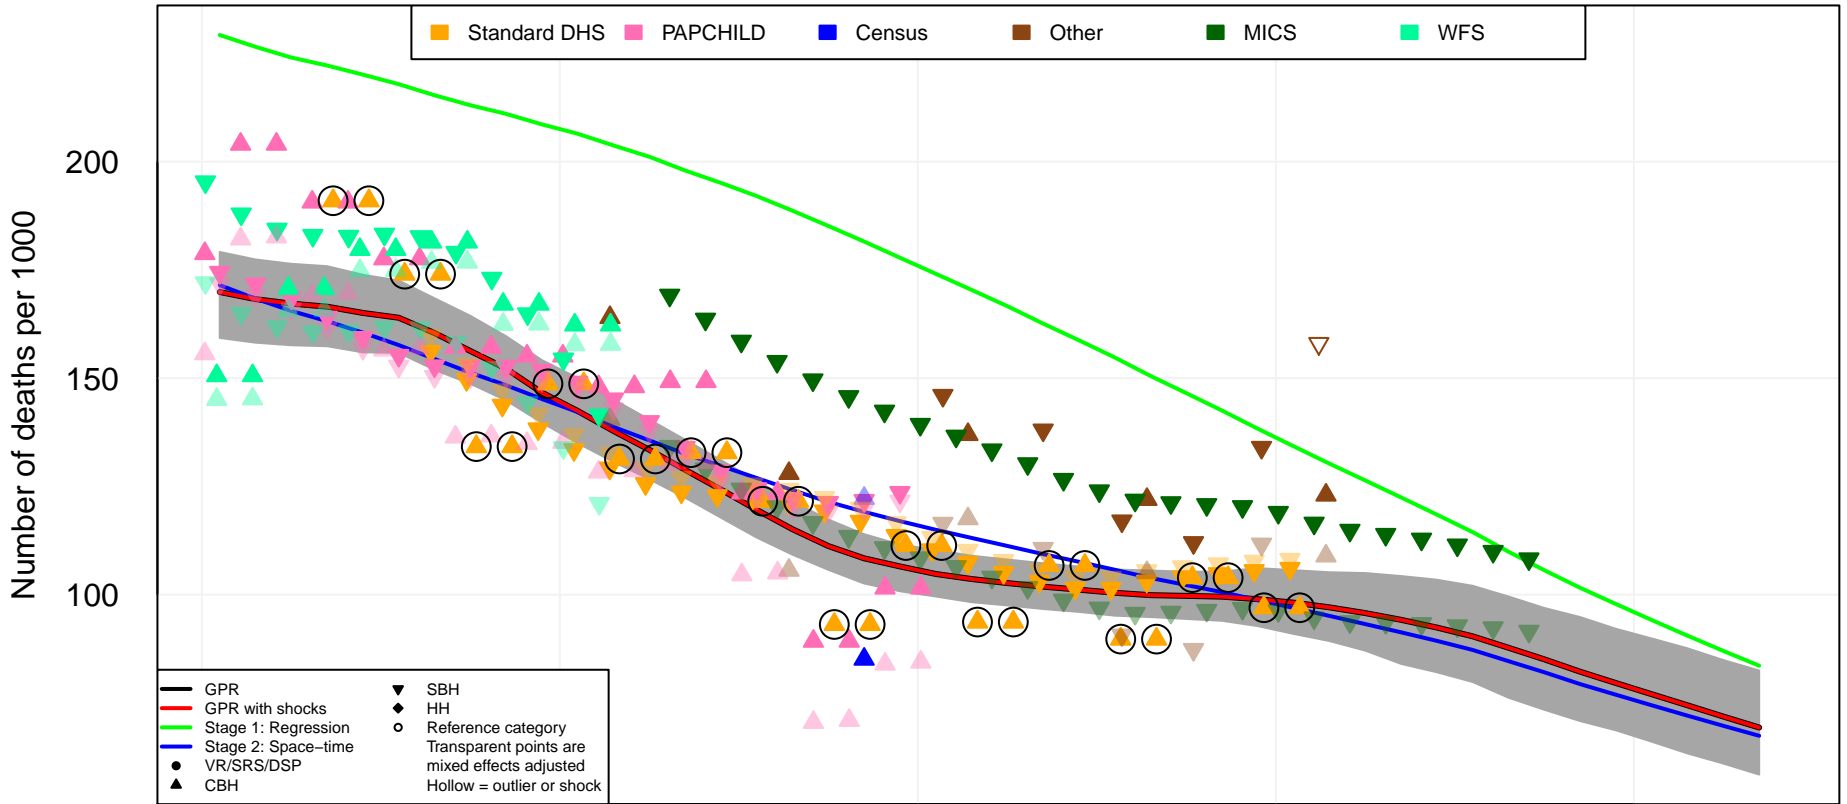

1970

1980

1990

2000

2010

Year

# sub-Saharan Africa, Western Niger (NER)

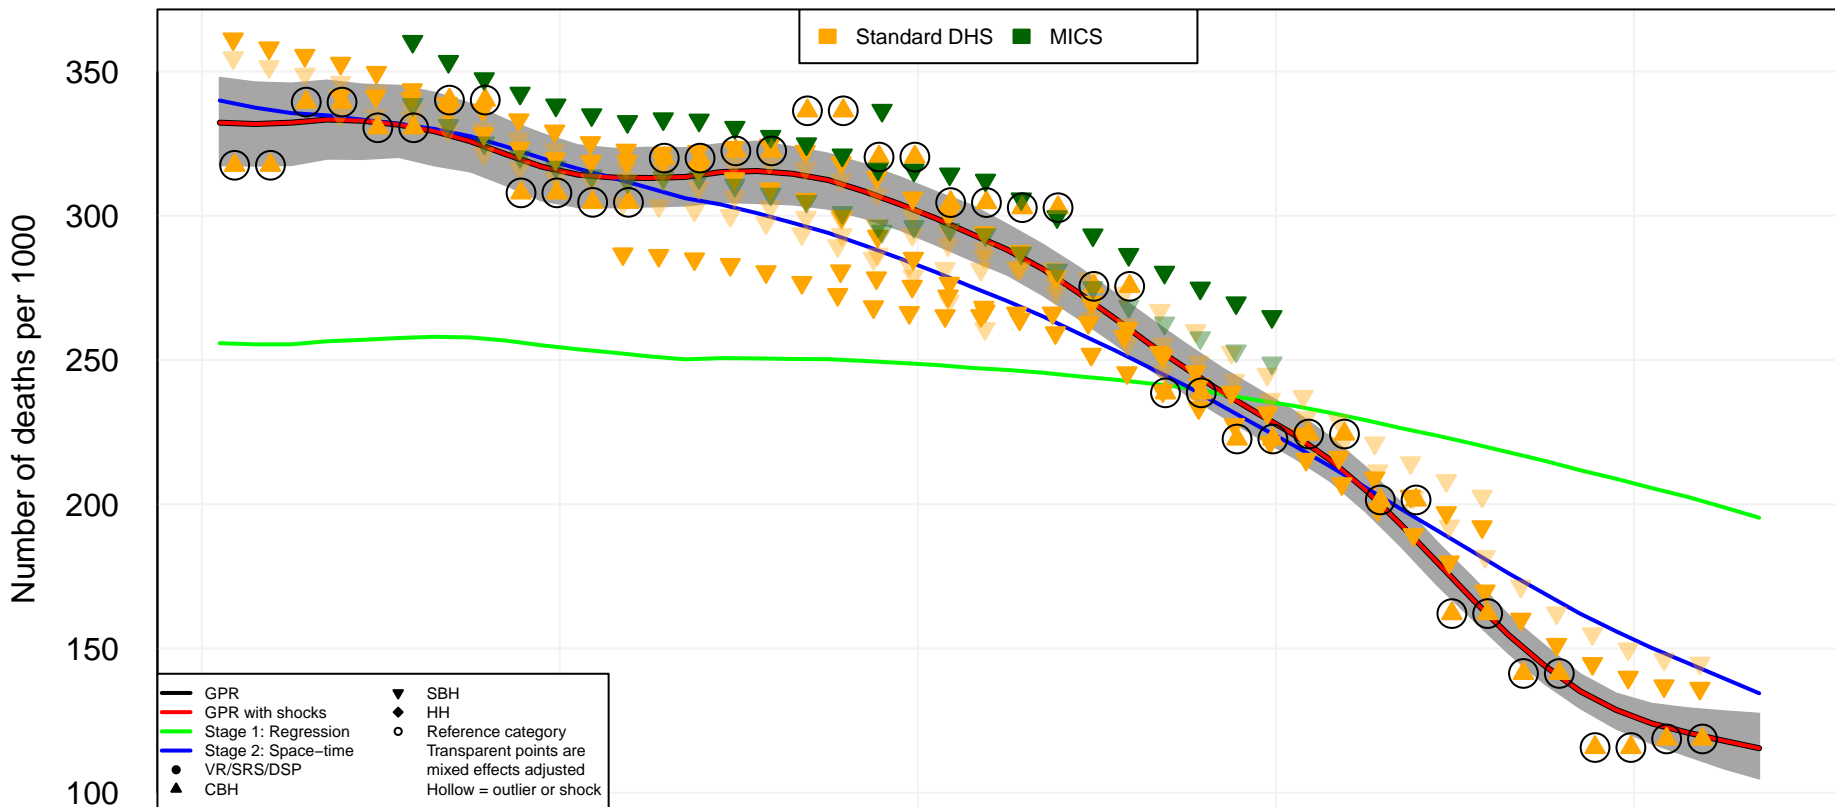

1970

1980

1990

2000

2010

Year

# sub-Saharan Africa, Western Nigeria (NGA)

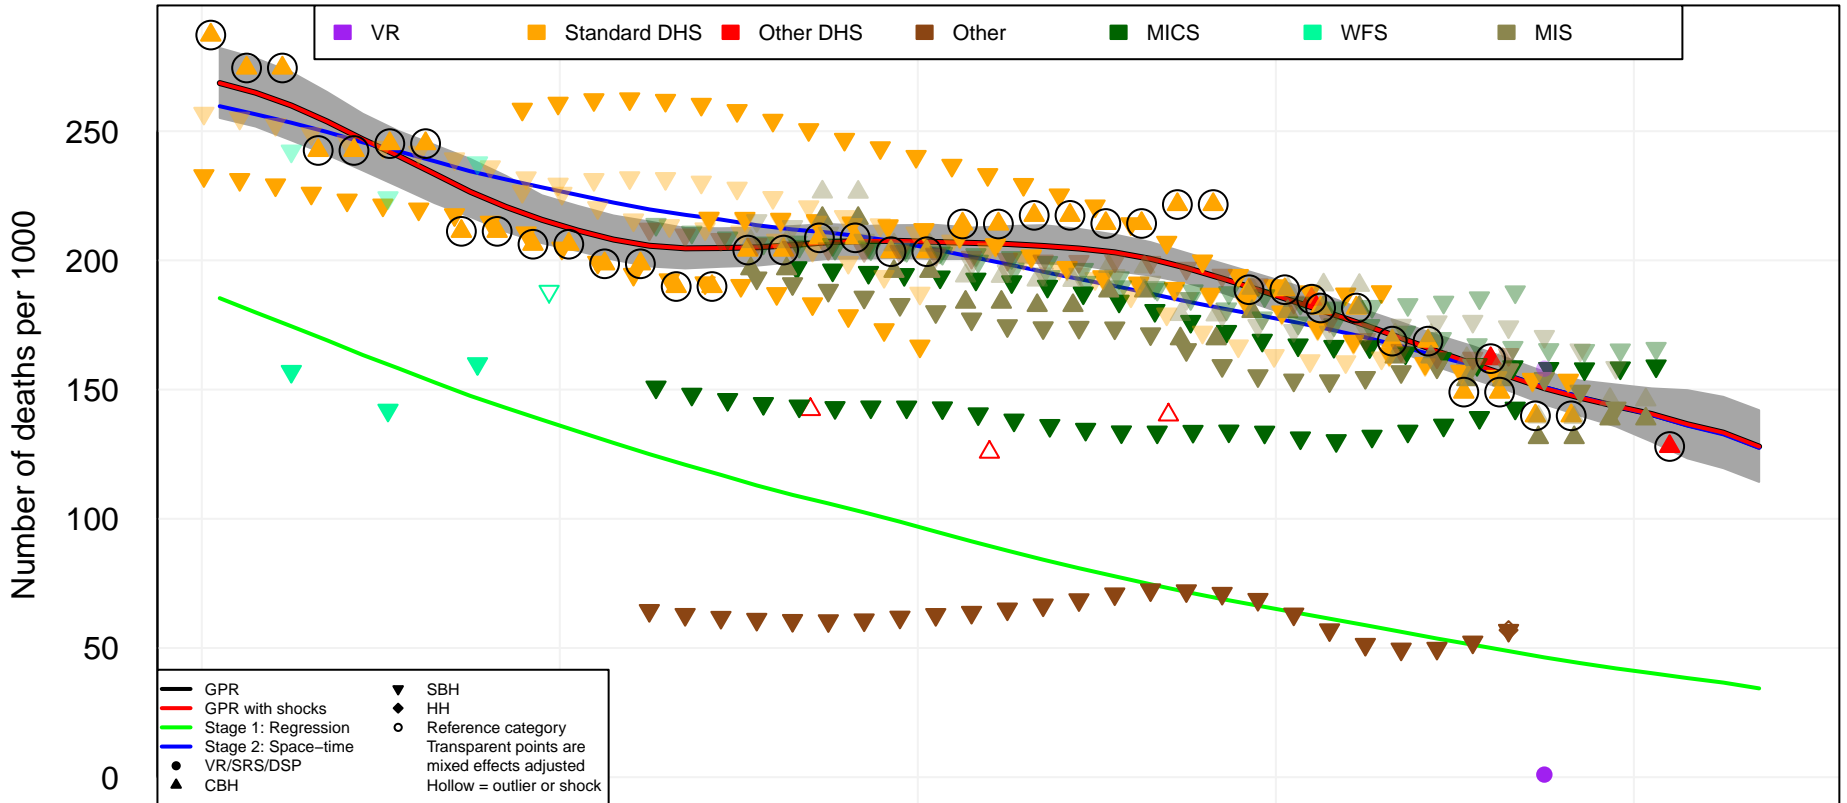

1970

1980

1990

2000

2010

Year

# sub-Saharan Africa, Western Senegal (SEN)

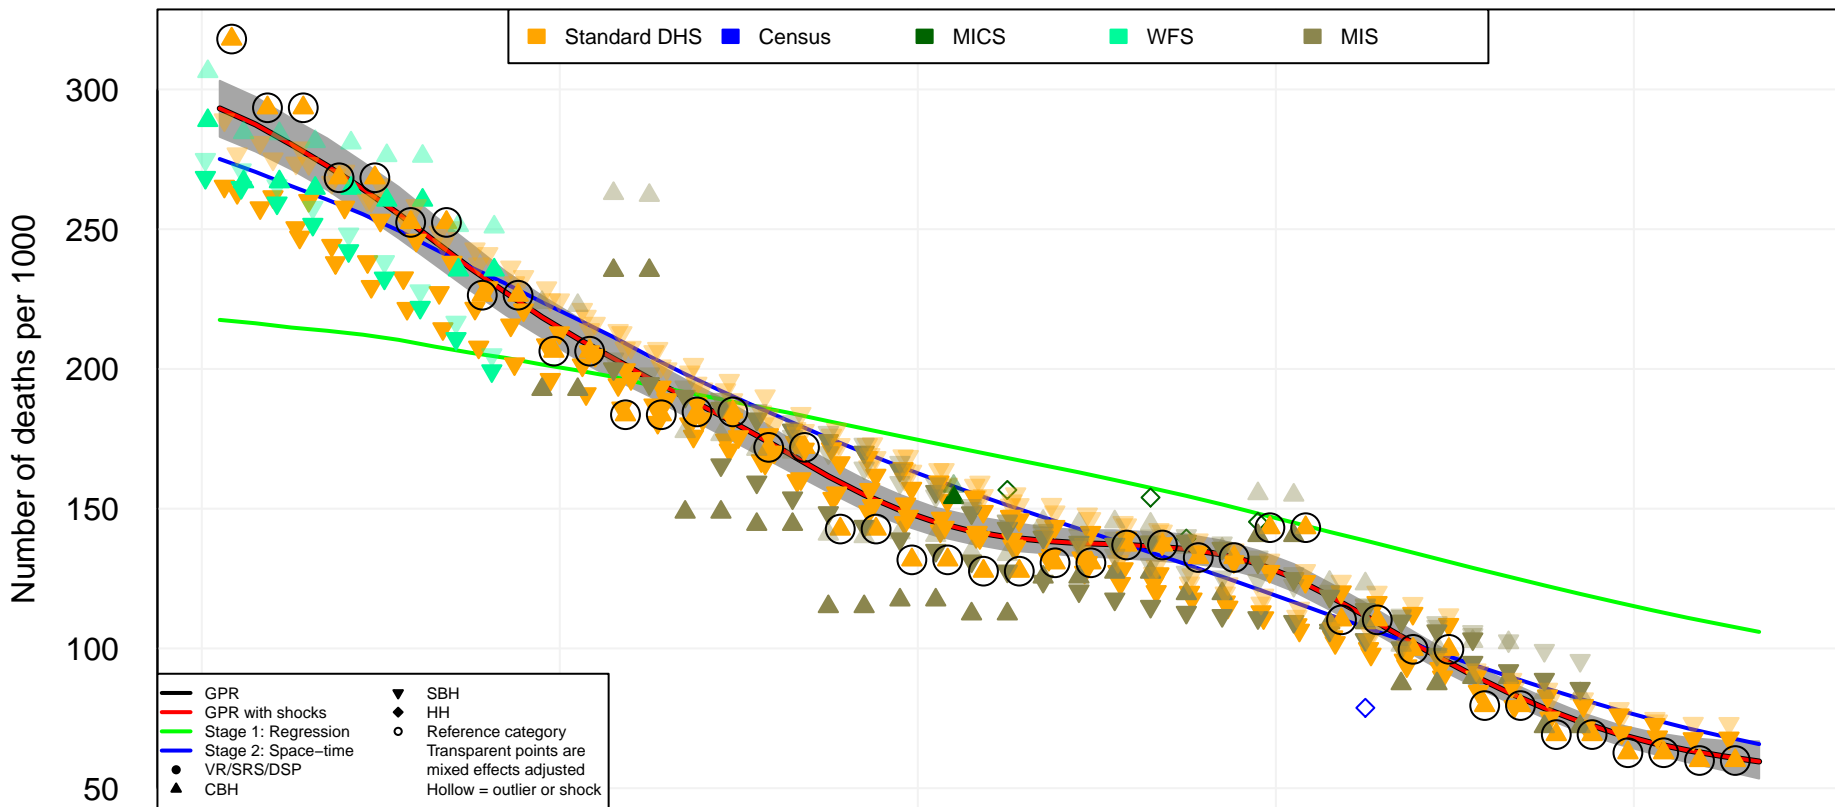

1970

1980

1990

2000

2010

Year

# sub-Saharan Africa, Western Sierra Leone (SLE)

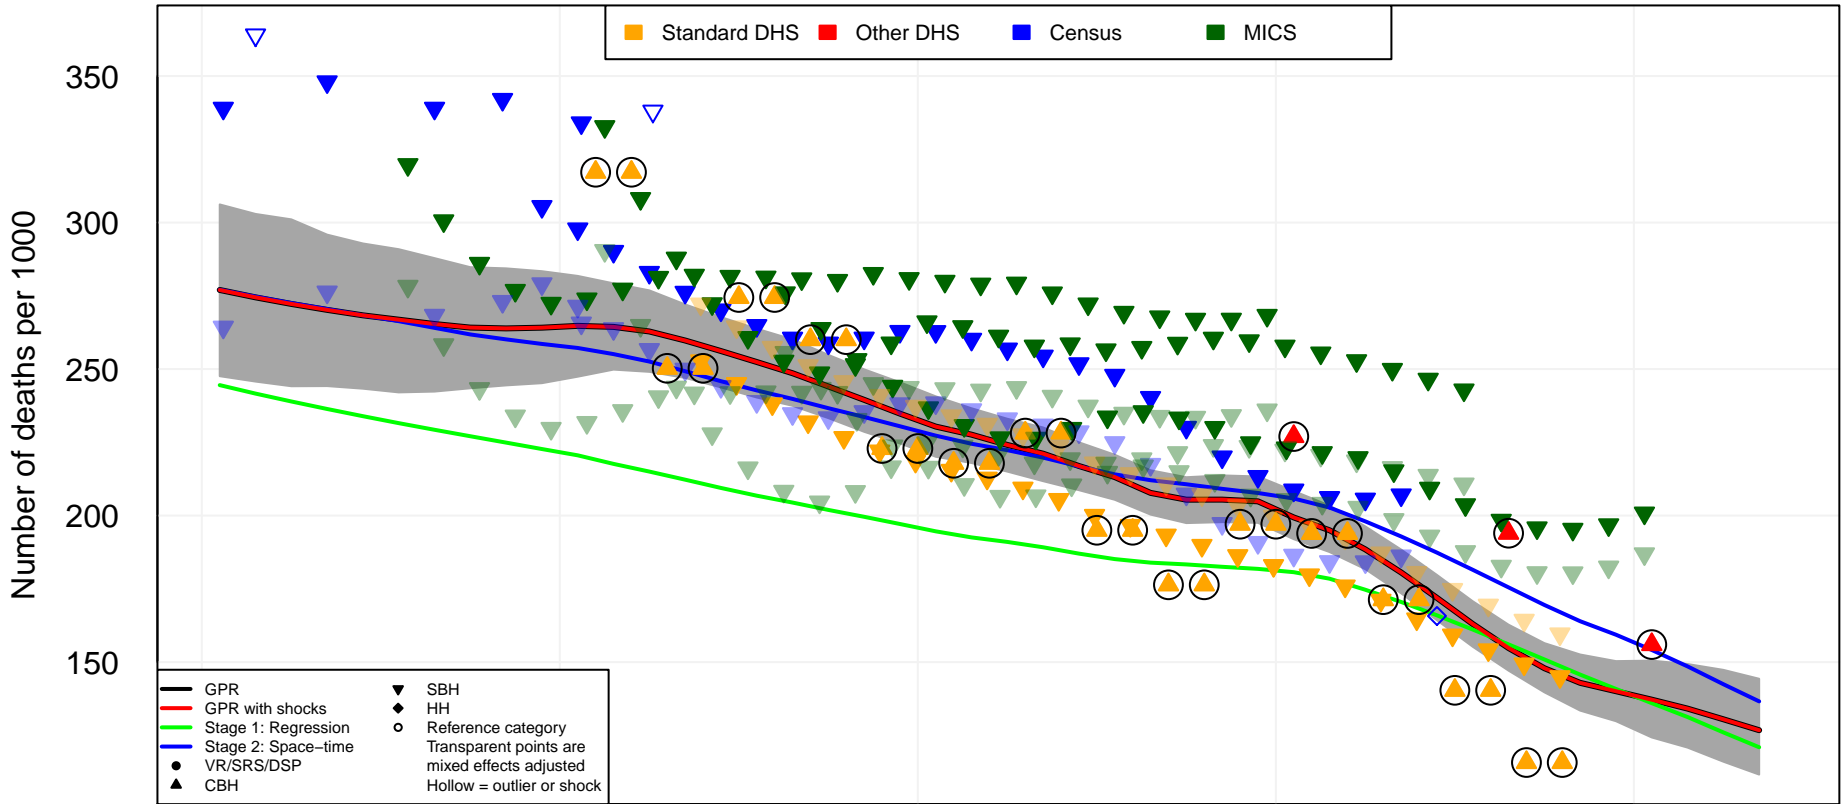

1970

1980

1990

2000

2010

Year

# sub-Saharan Africa, Western Sao Tome and Principe (STP)

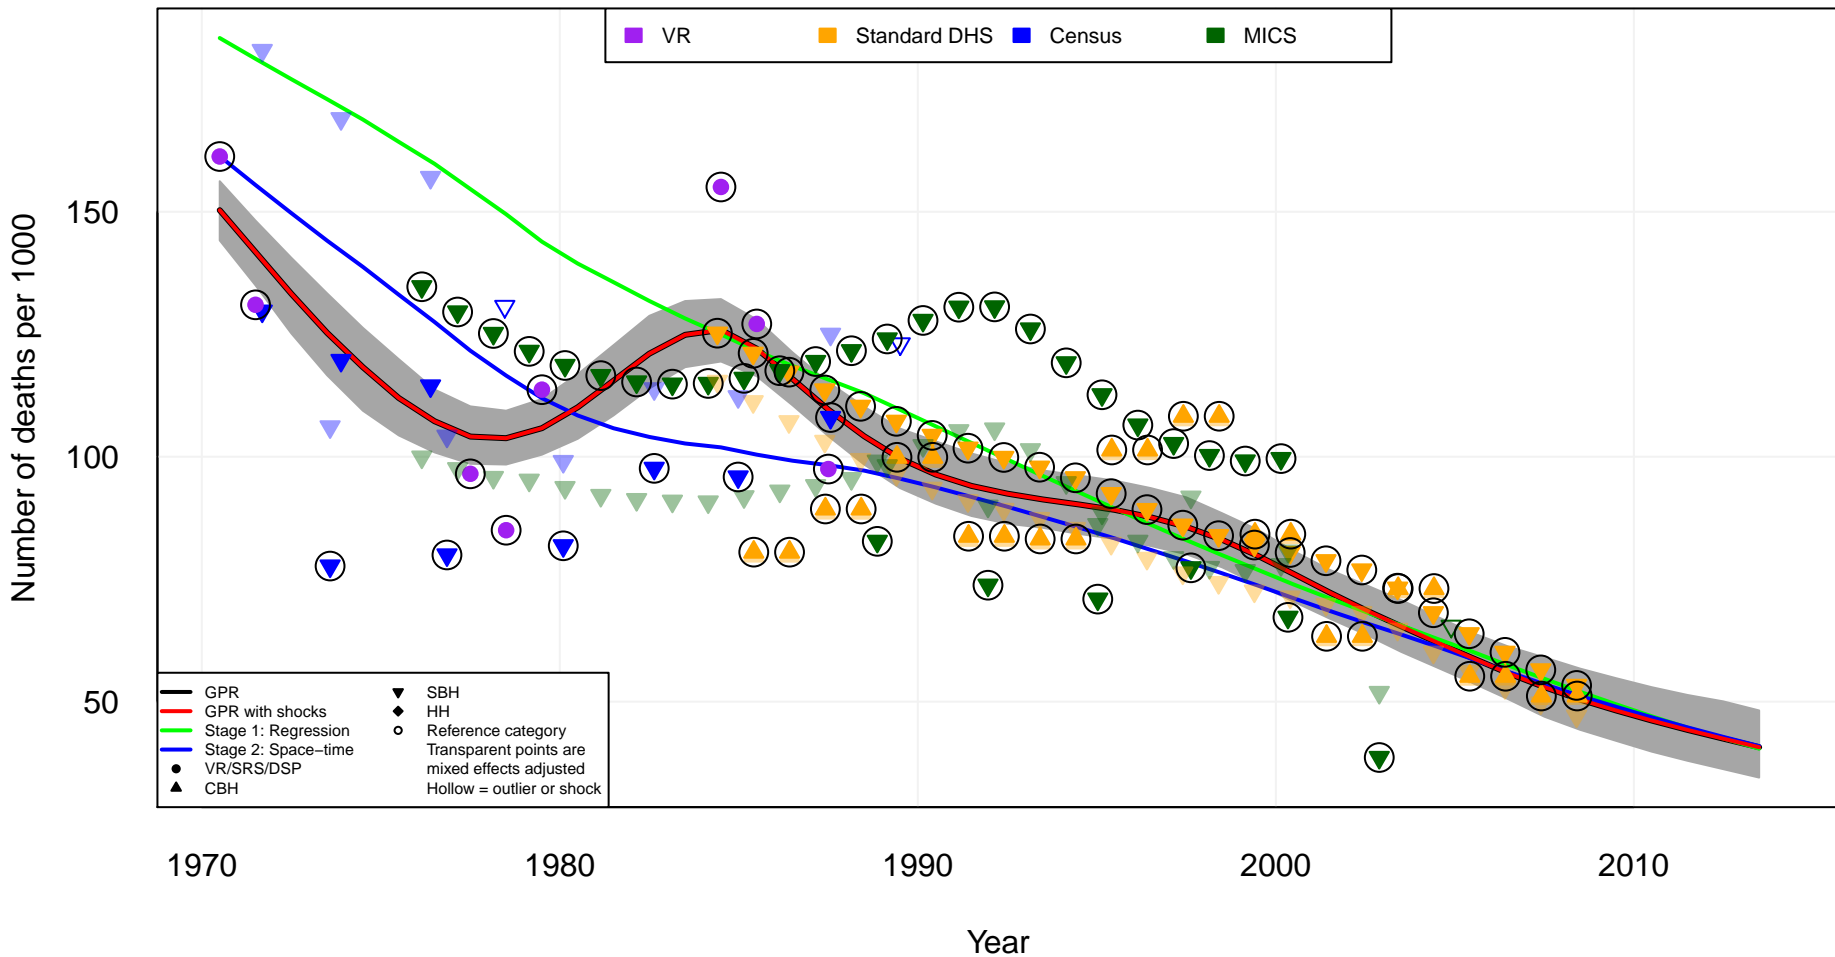

# sub-Saharan Africa, Western Chad (TCD)

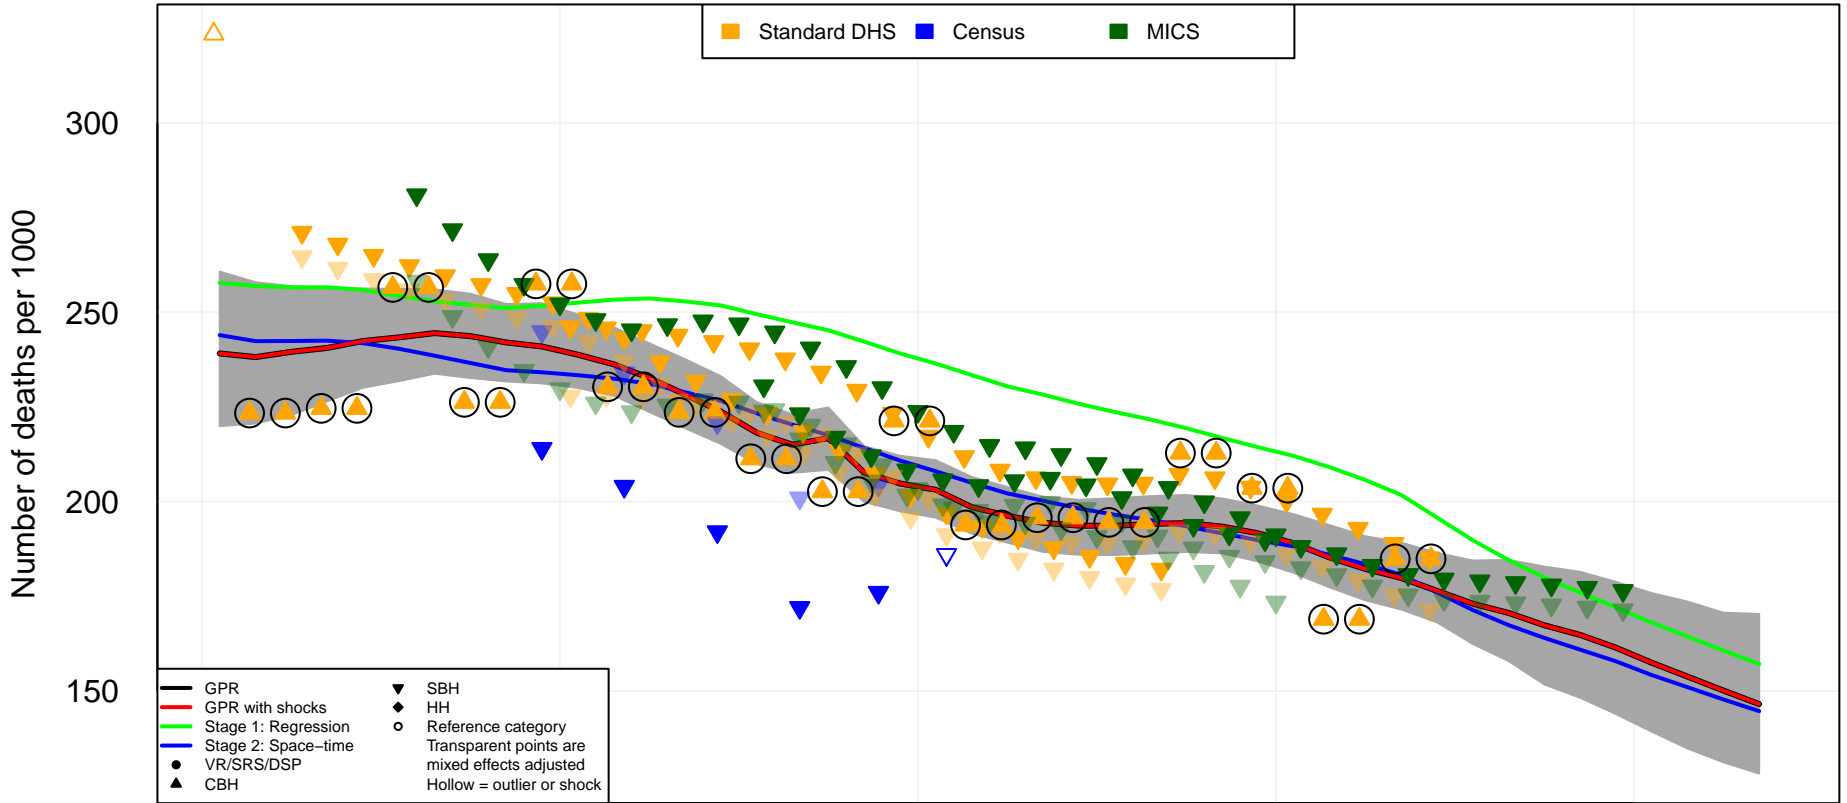

1970

1980

1990

2000

2010

Year

# sub-Saharan Africa, Western Togo (TGO)

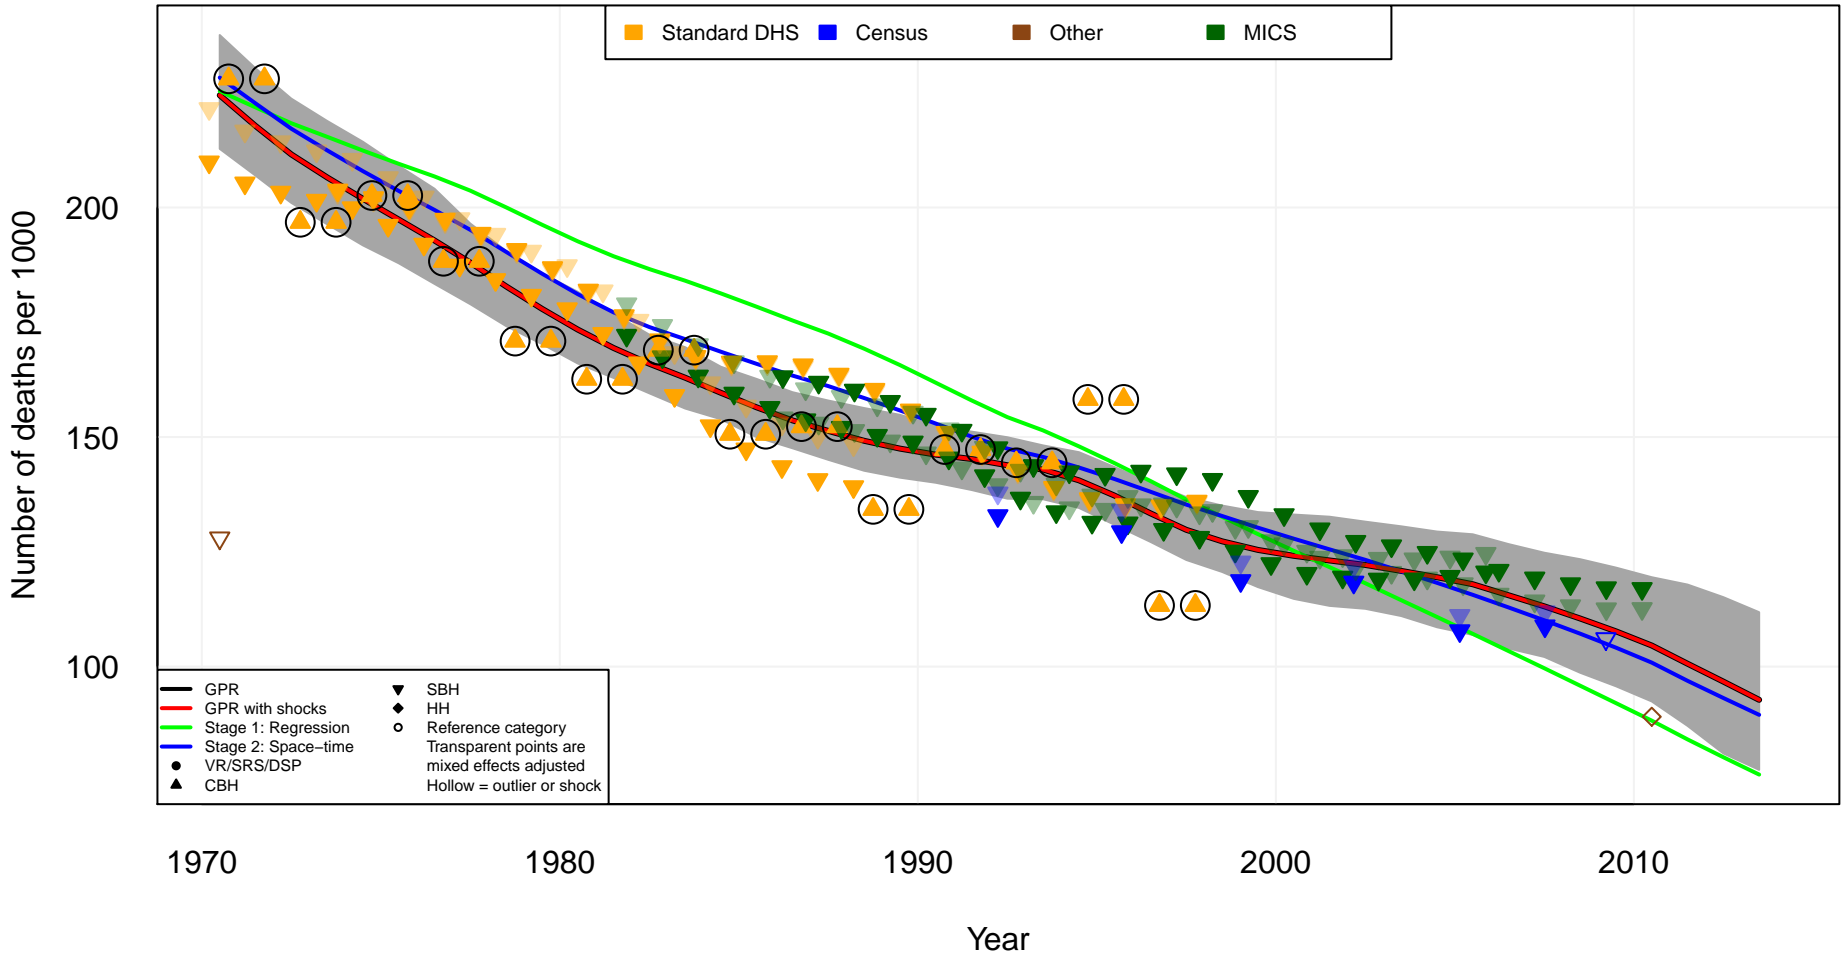



**Web figure 2. Regional rate of change in under-5 mortality rate, 1970-2013.**

Rate of change in under-5 mortality rate: Asia Pacific, High-income, 1970-2013

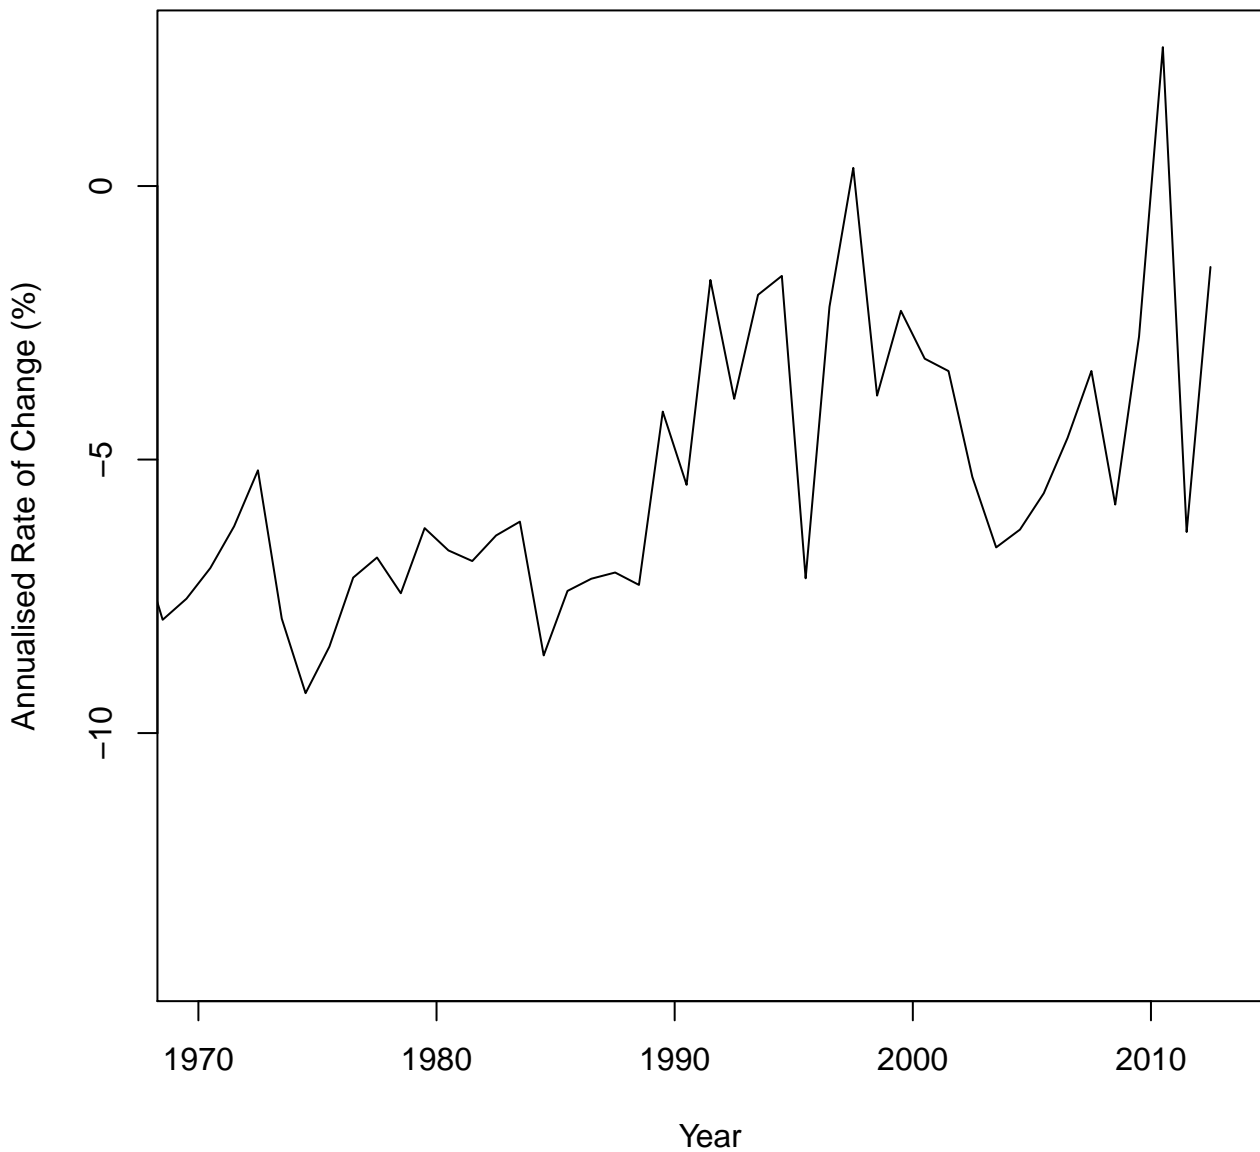

Rate of change in under-5 mortality rate: Asia, Central, 1970–2013

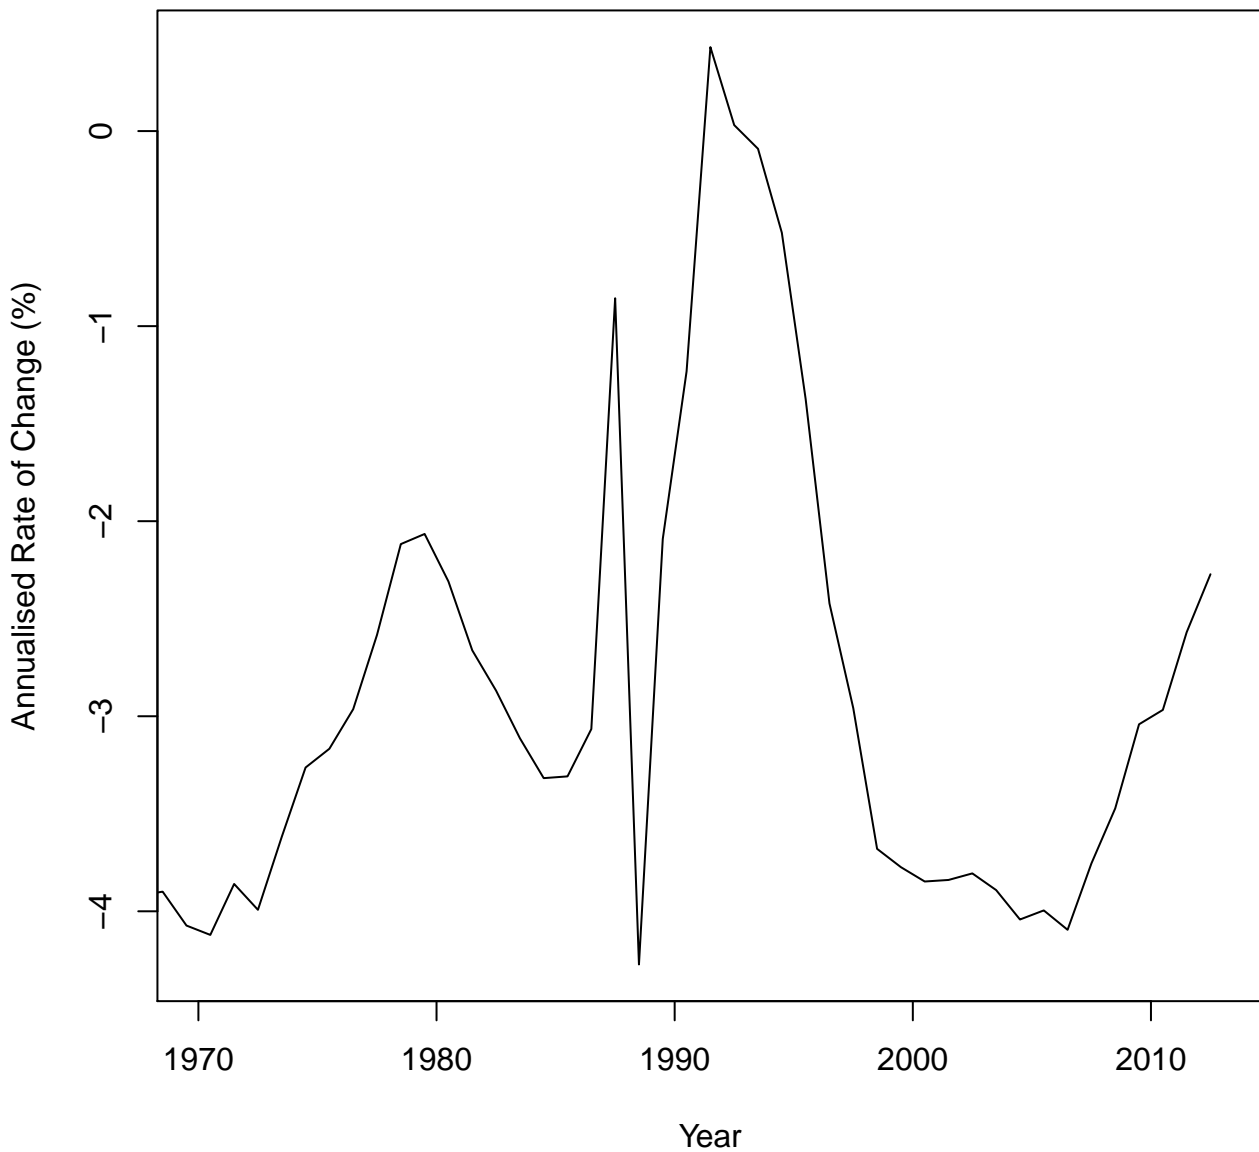

### Rate of change in under-5 mortality rate: Asia, East, 1970-2013

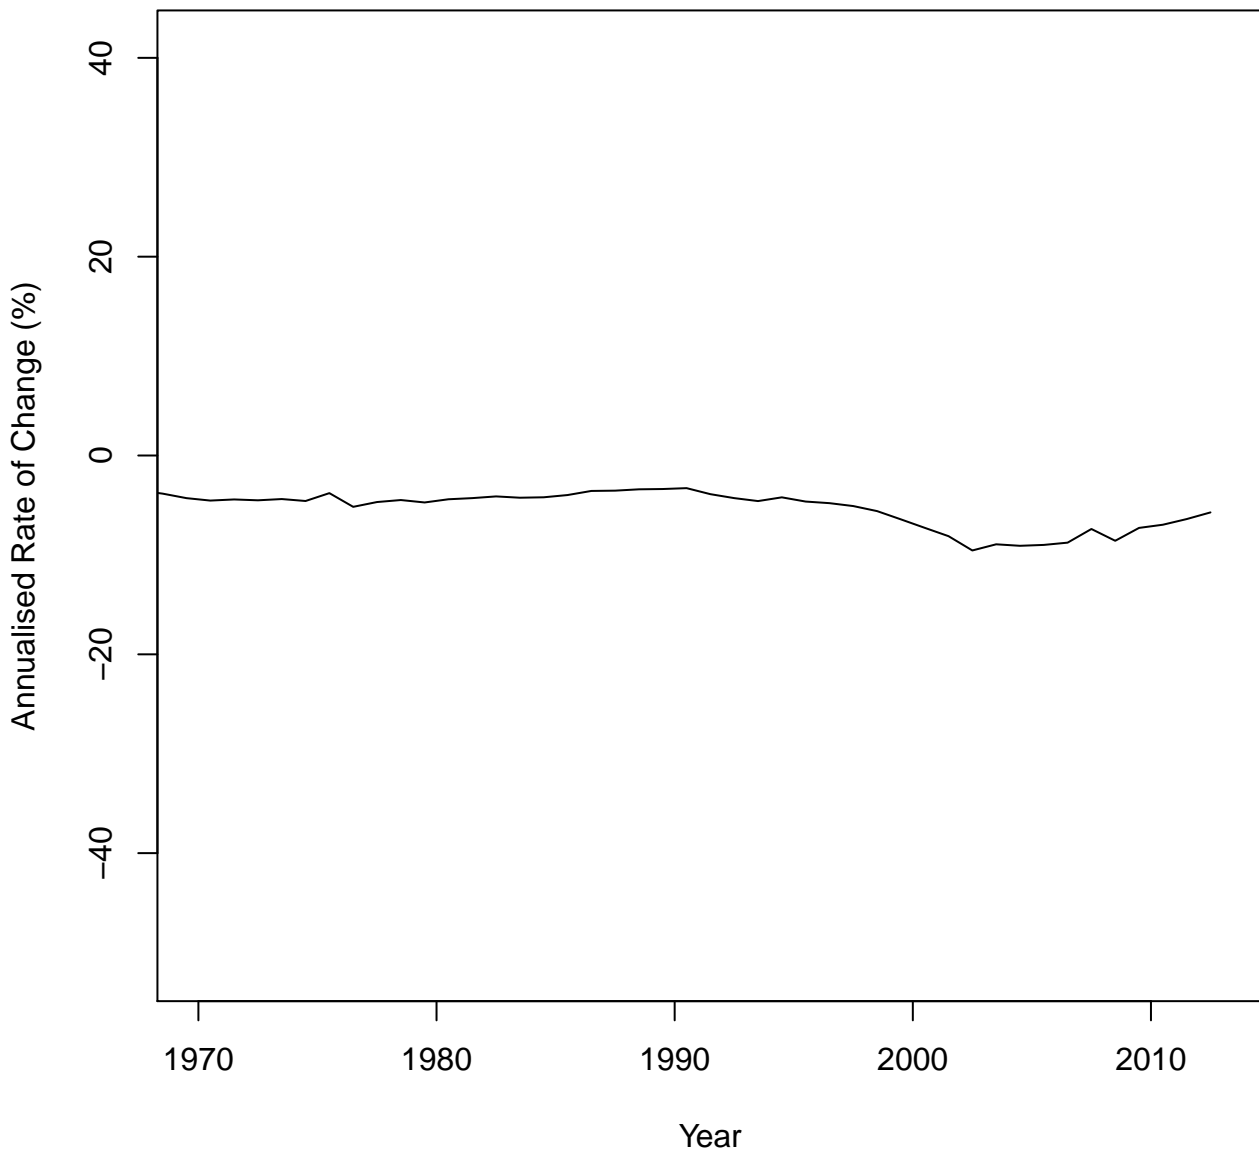

### Rate of change in under-5 mortality rate: Asia, South, 1970-2013

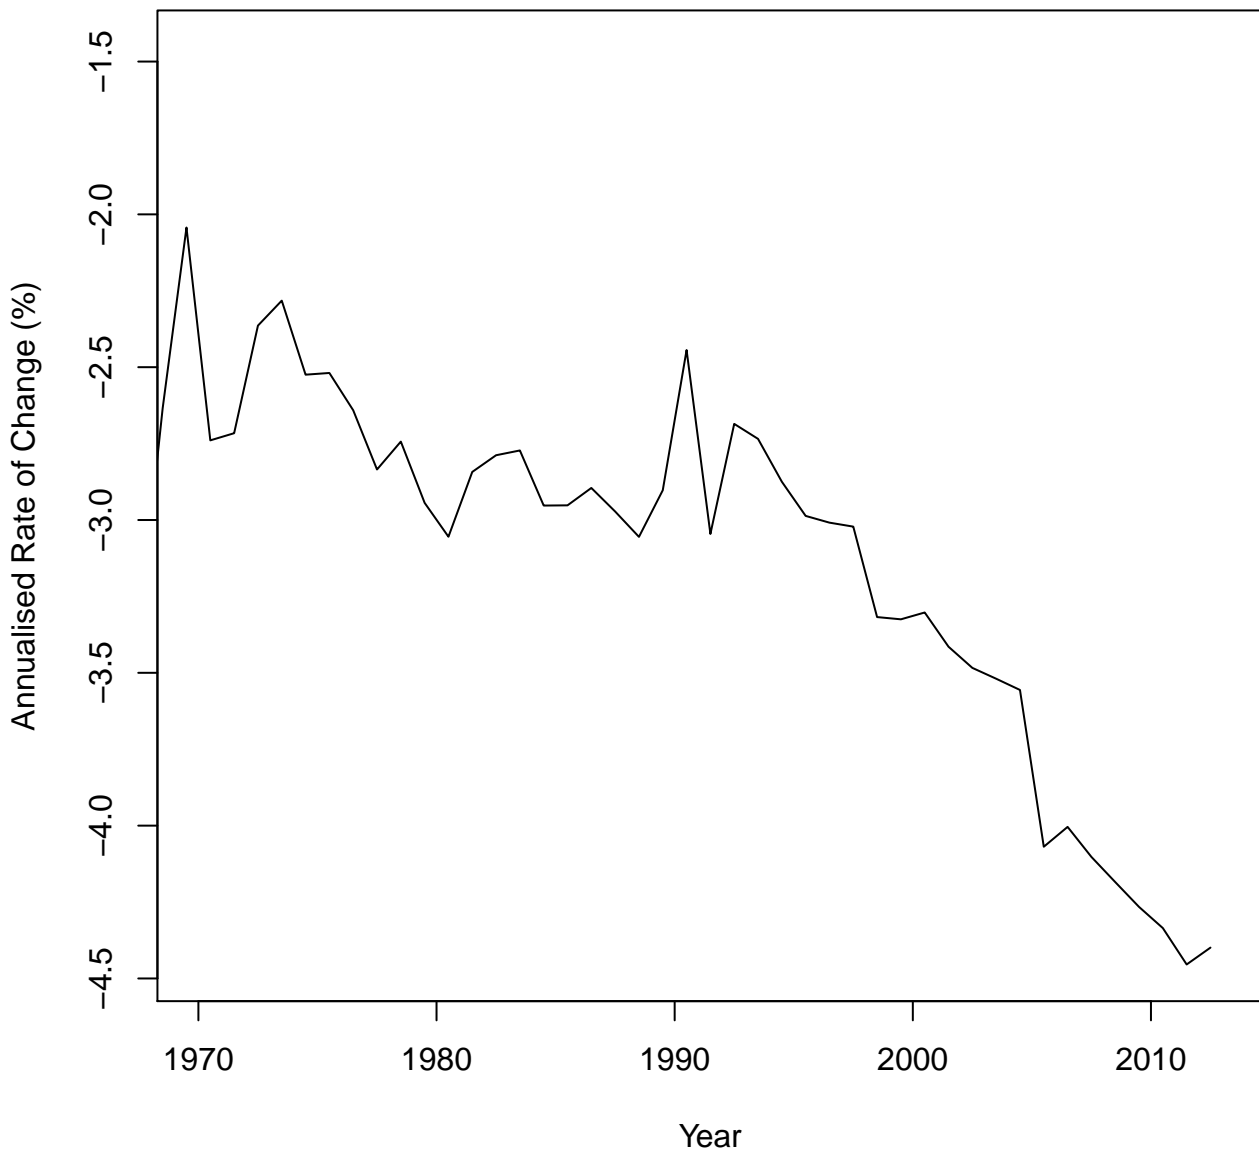

Rate of change in under-5 mortality rate: Asia, Southeast, 1970-2013

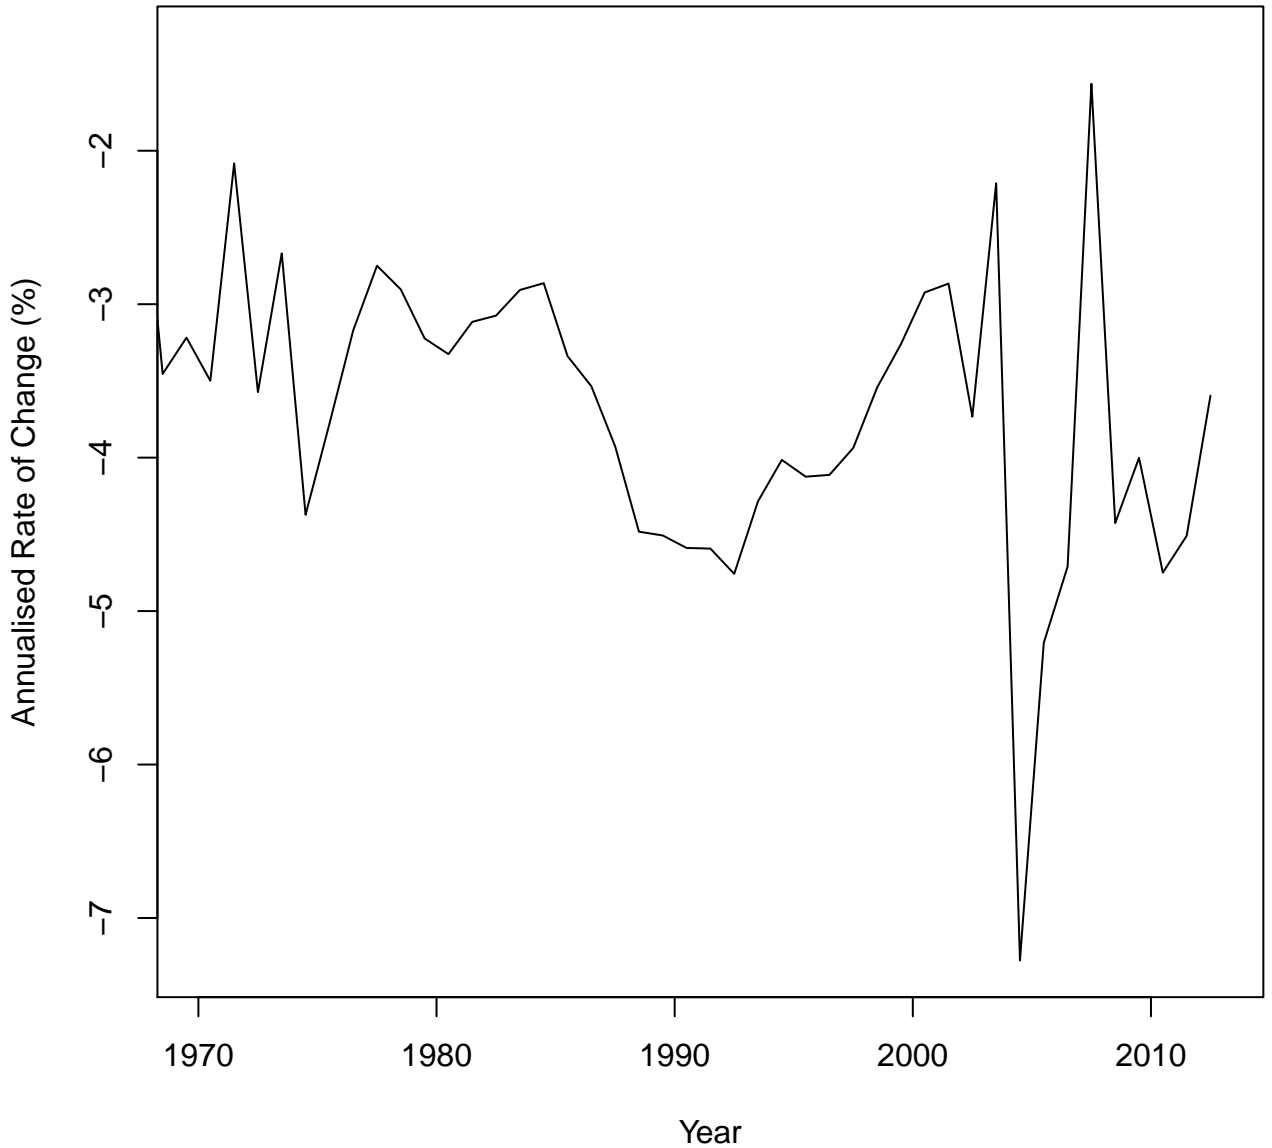

Rate of change in under-5 mortality rate: Australasia, 1970-2013

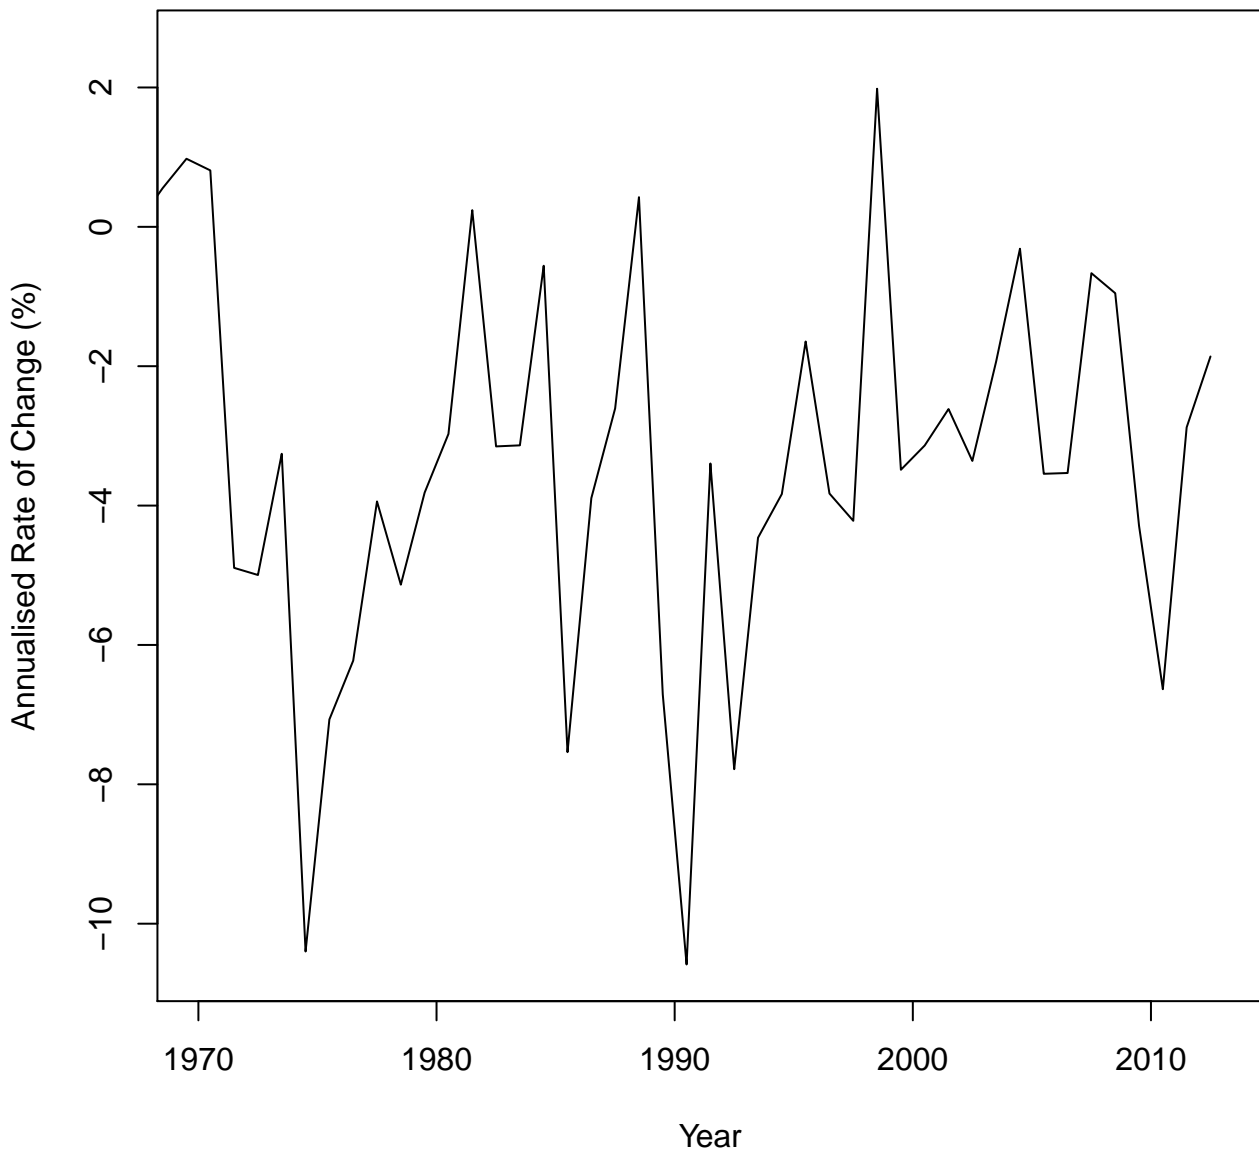

Rate of change in under-5 mortality rate: Caribbean, 1970-2013

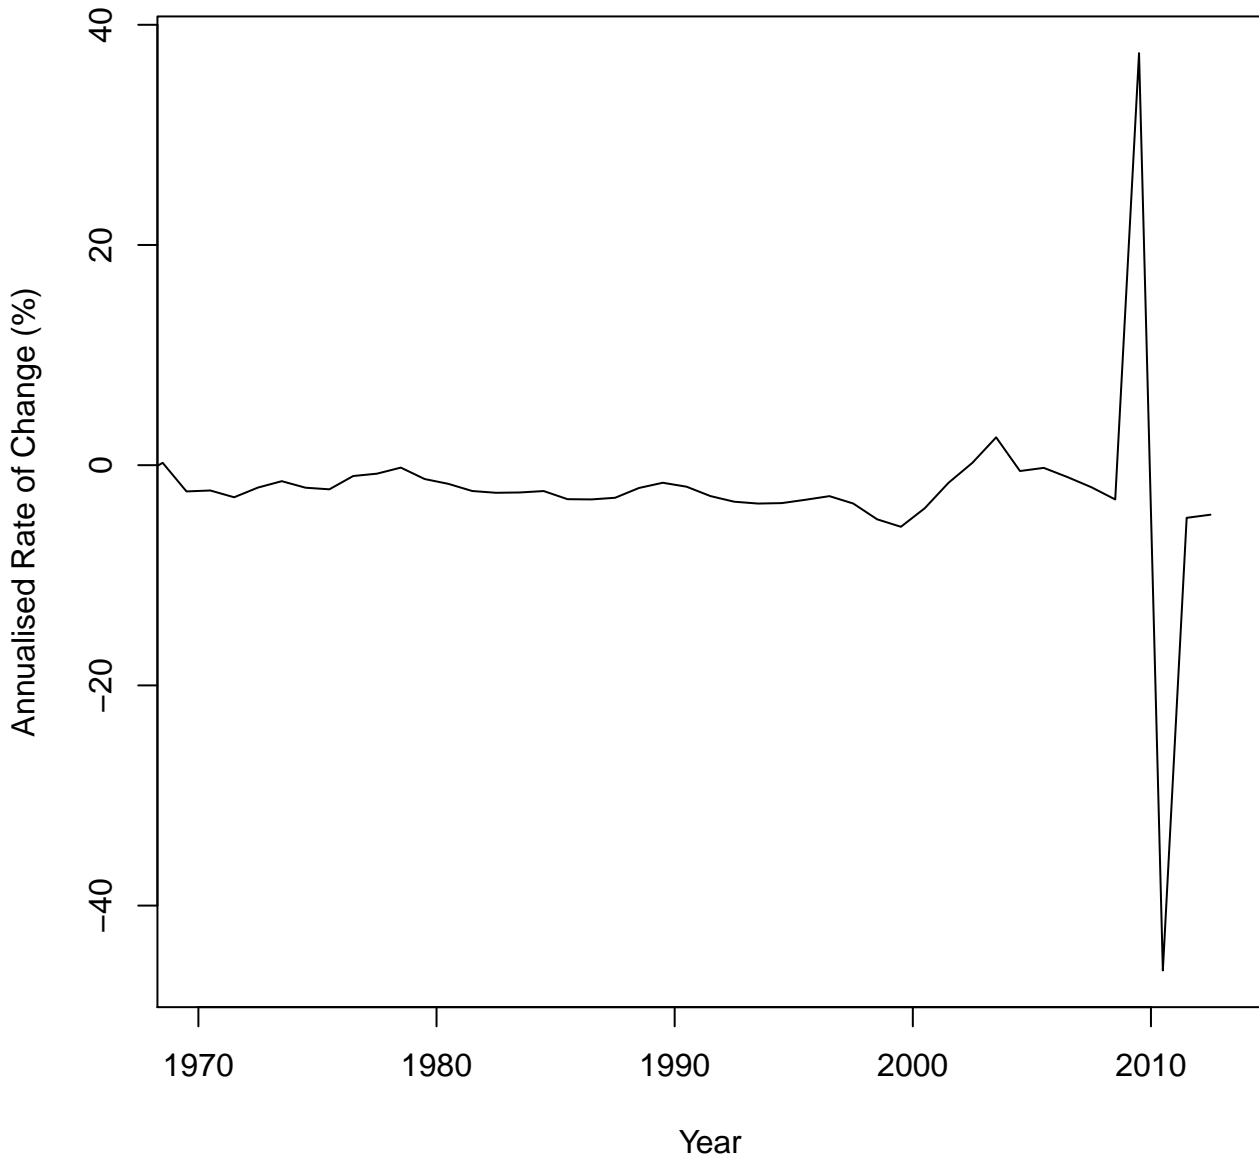



Rate of change in under-5 mortality rate: Europe, Central, 1970-2013

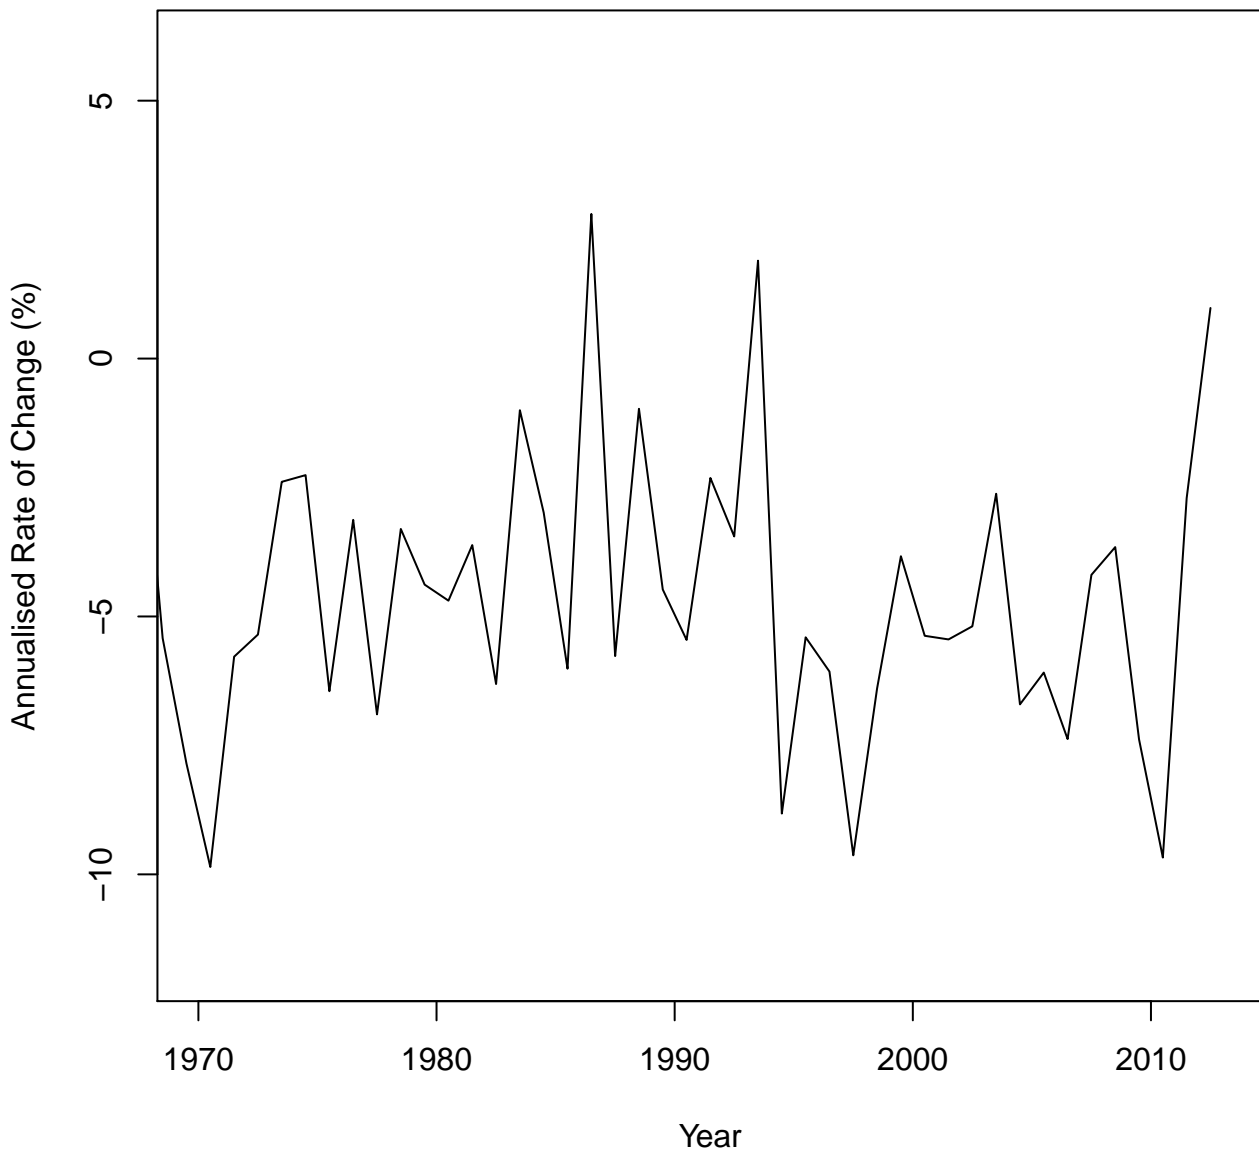

Rate of change in under-5 mortality rate: Europe, Eastern, 1970-2013

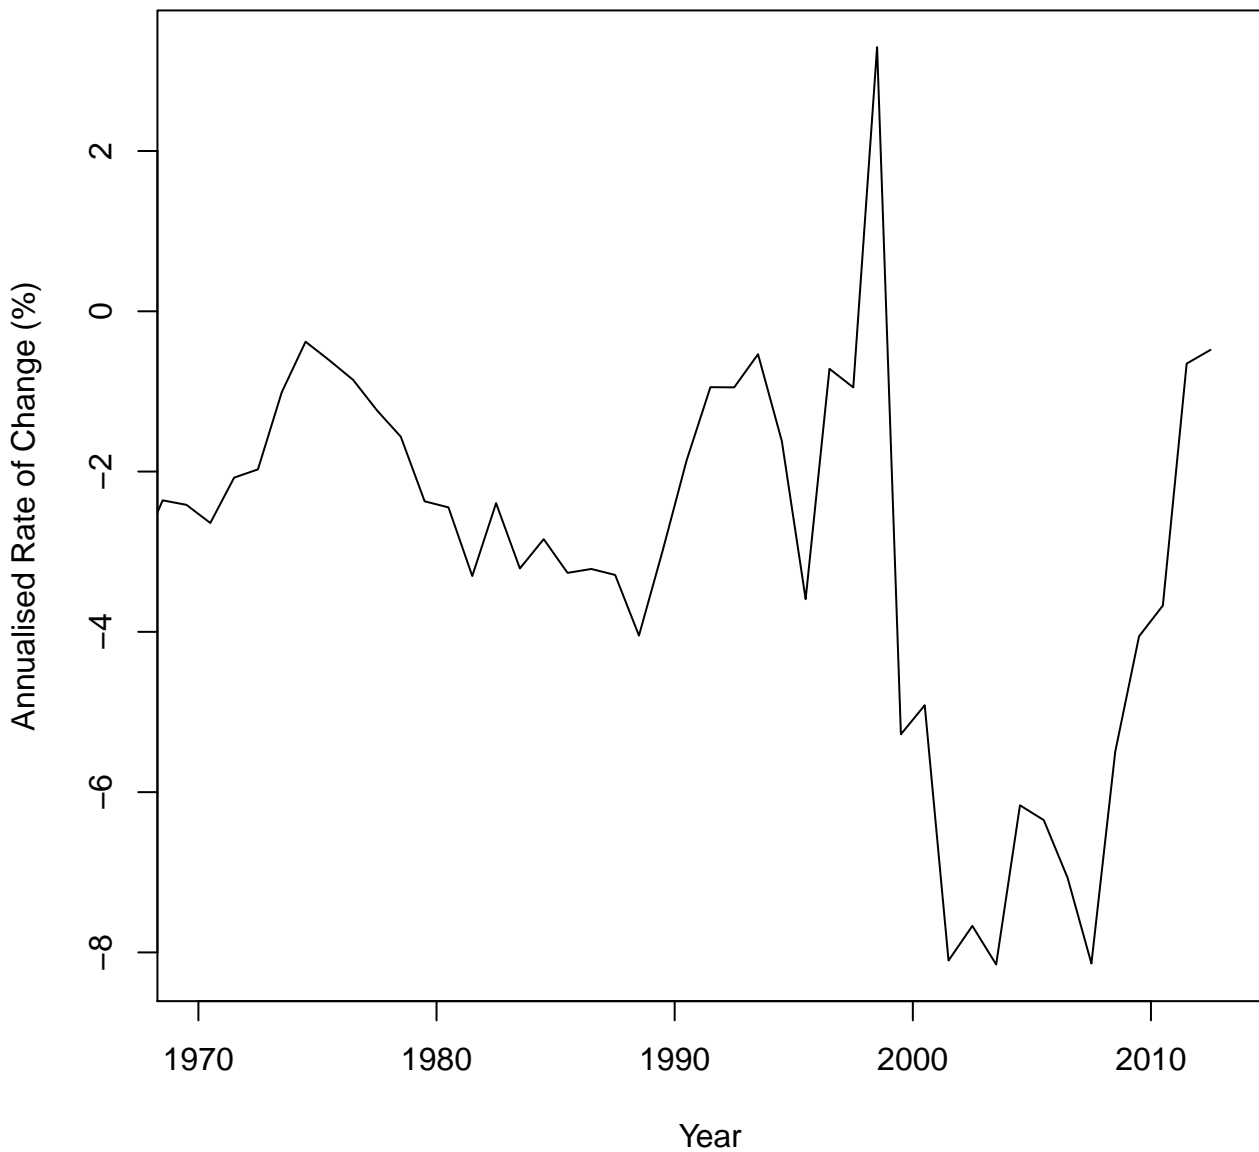

**Rate of change in under-5 mortality rate: Europe, Western, 1970-2013**

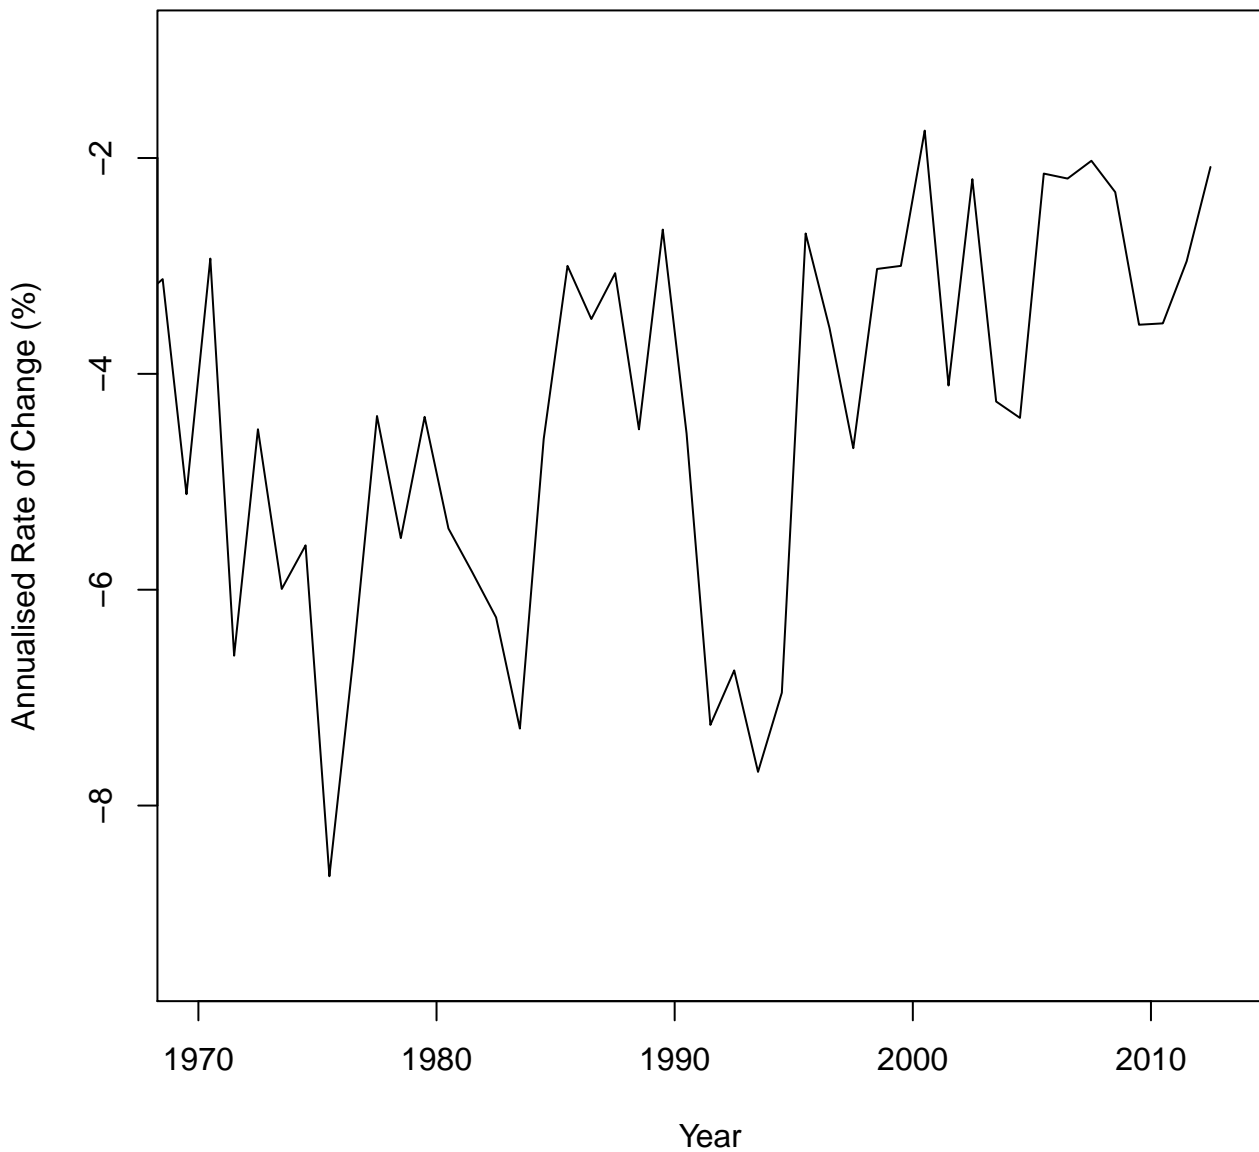

# Rate of change in under-5 mortality rate: Latin America, Andean, 1970-2013

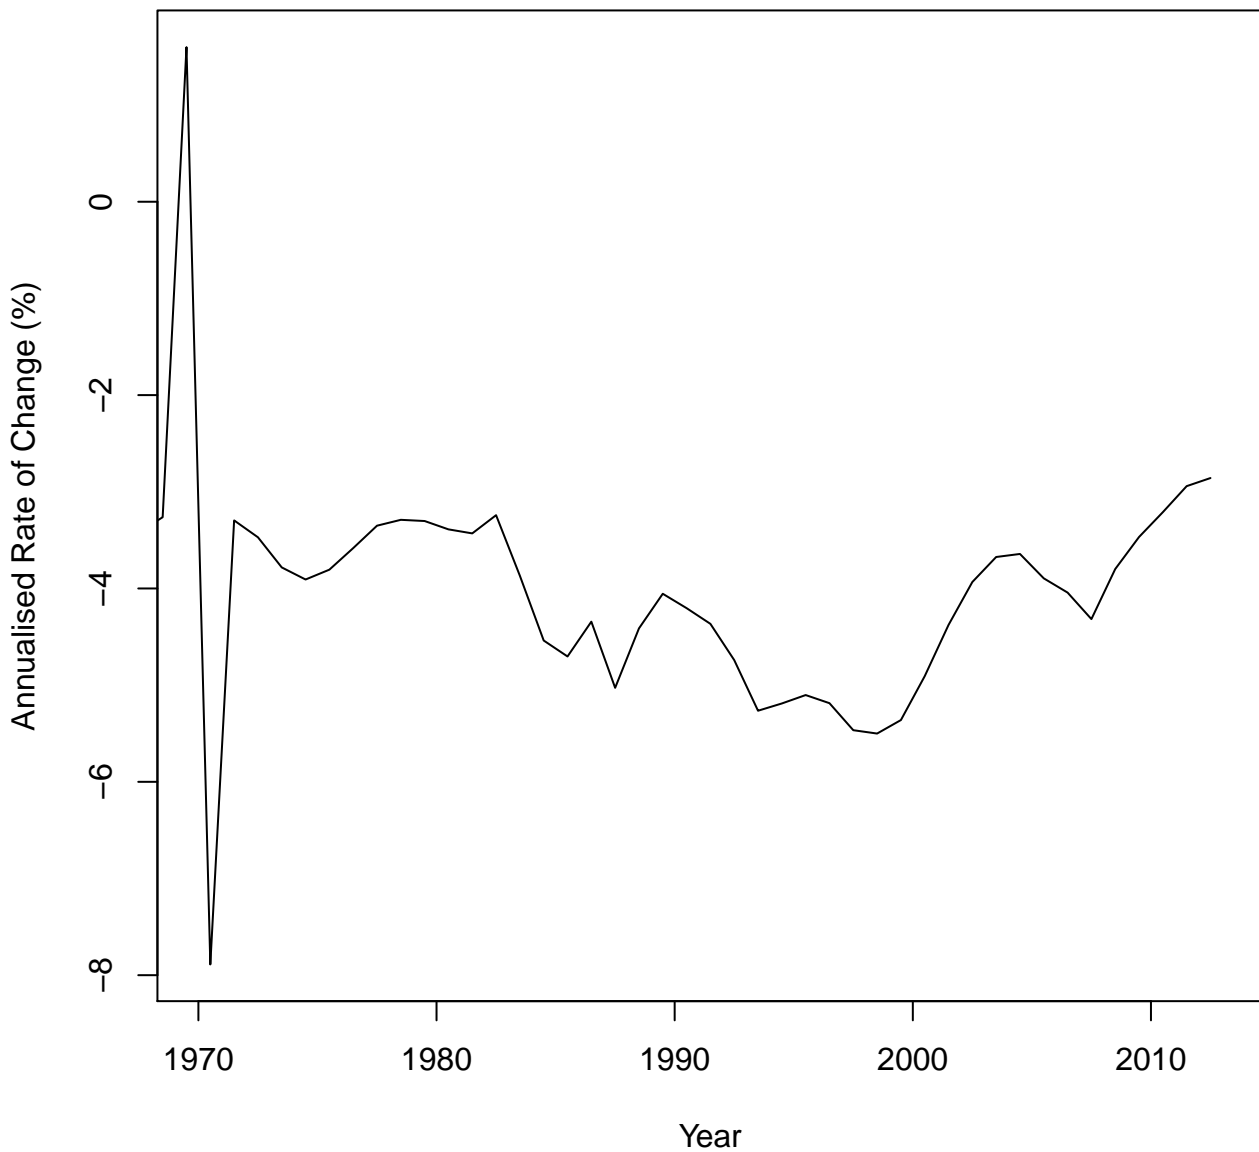

Rate of change in under-5 mortality rate: Latin America, Central, 1970-2013

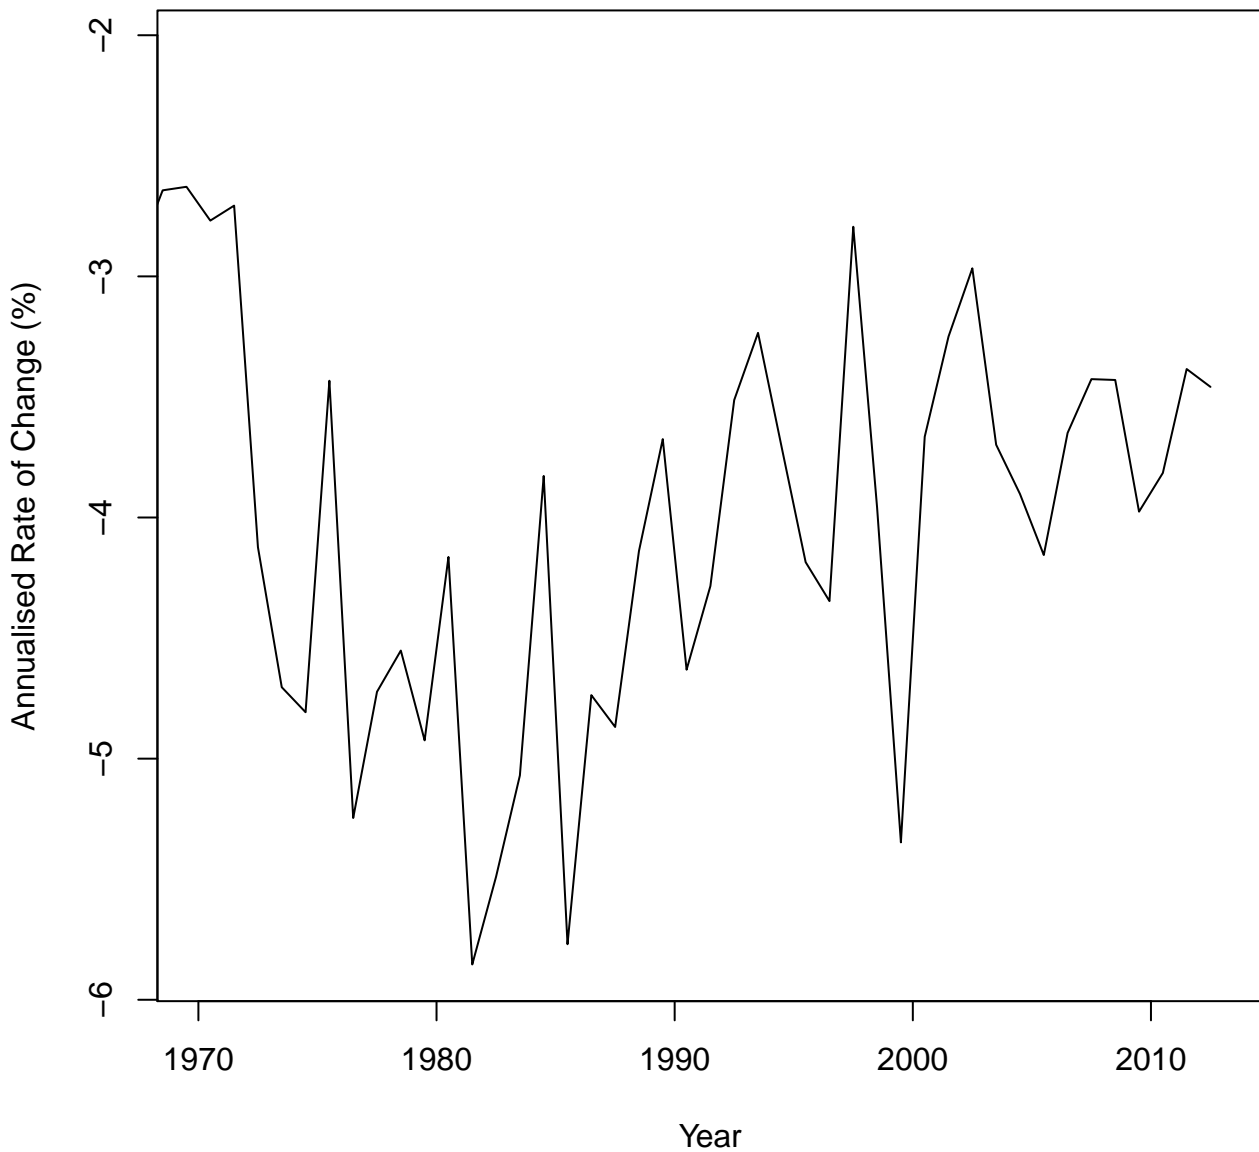

Rate of change in under-5 mortality rate: Latin America, Southern, 1970-2013

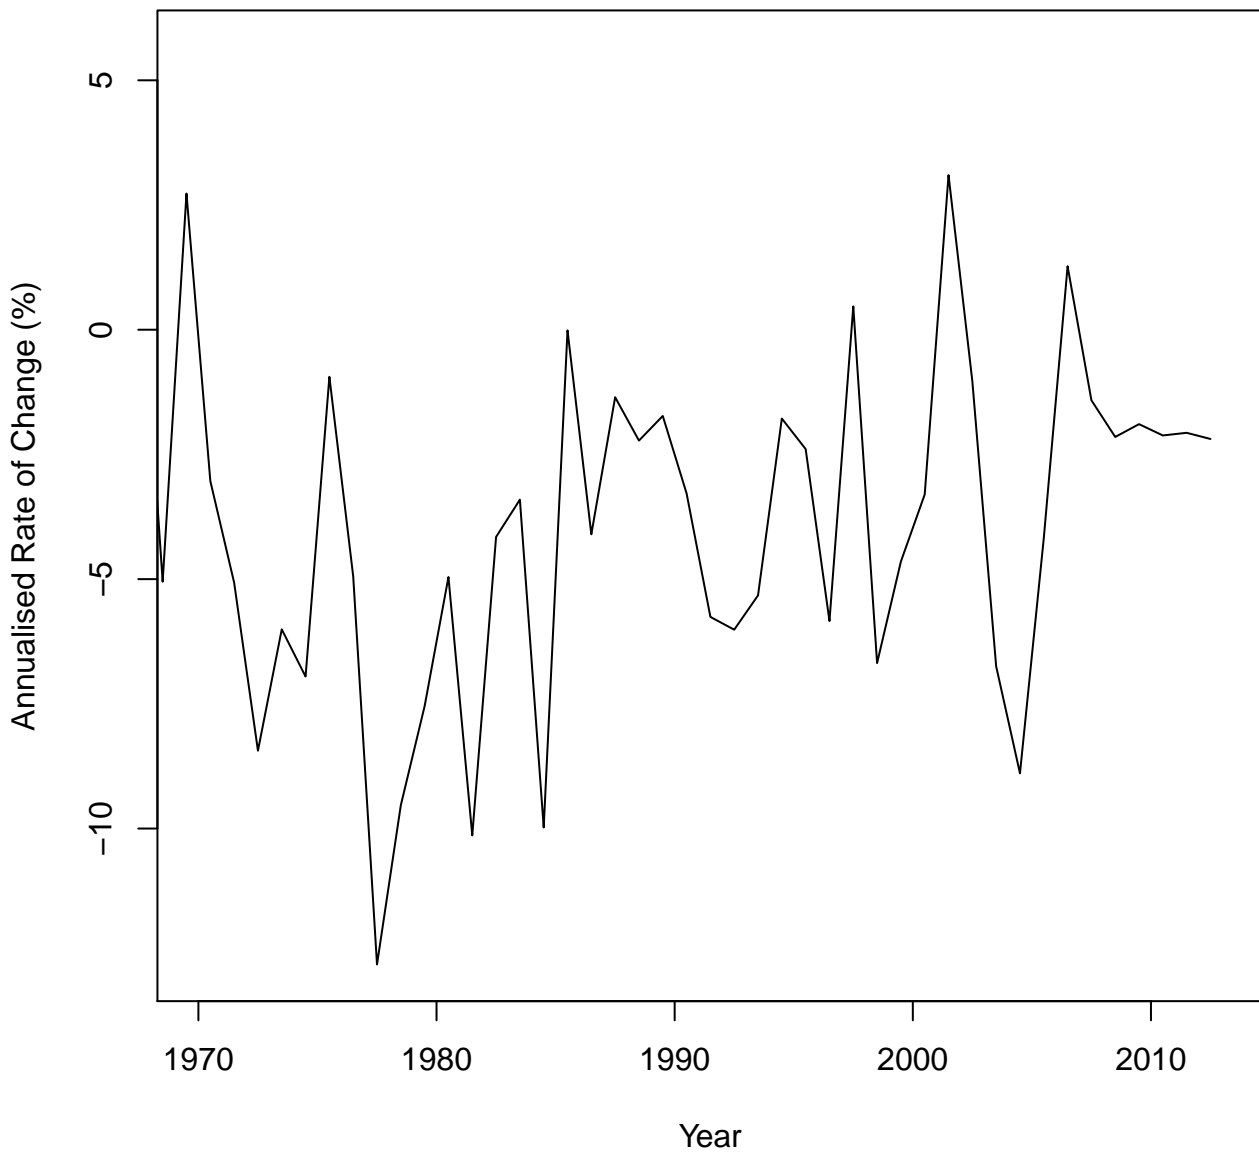

Rate of change in under-5 mortality rate: Latin America, Tropical, 1970-2013

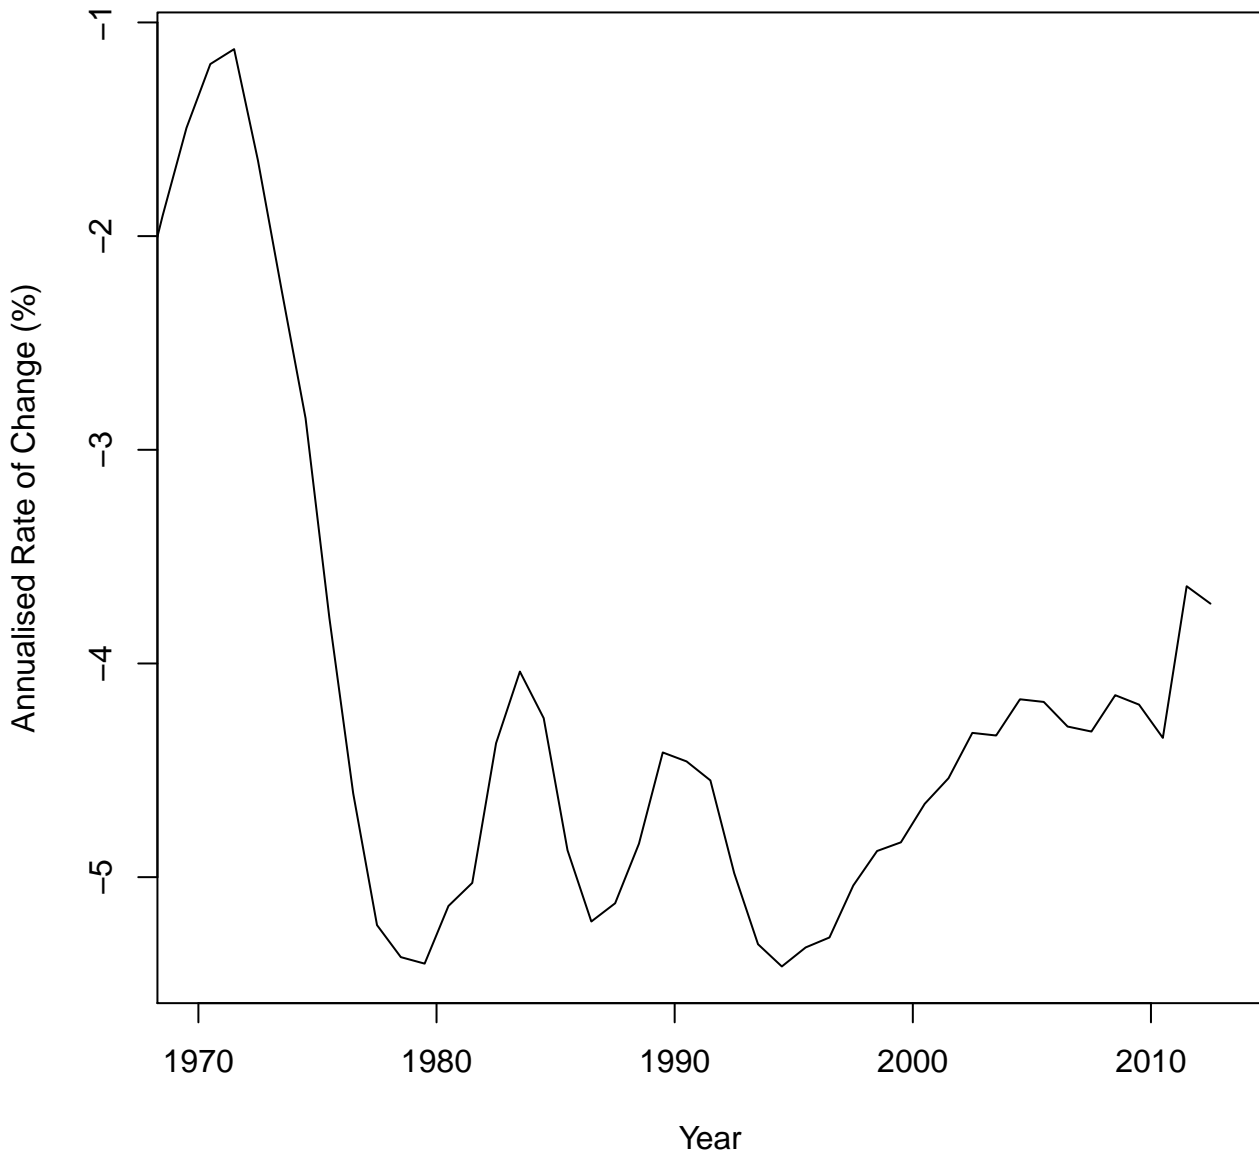

Rate of change in under-5 mortality rate: North Africa/Middle East, 1970-2013

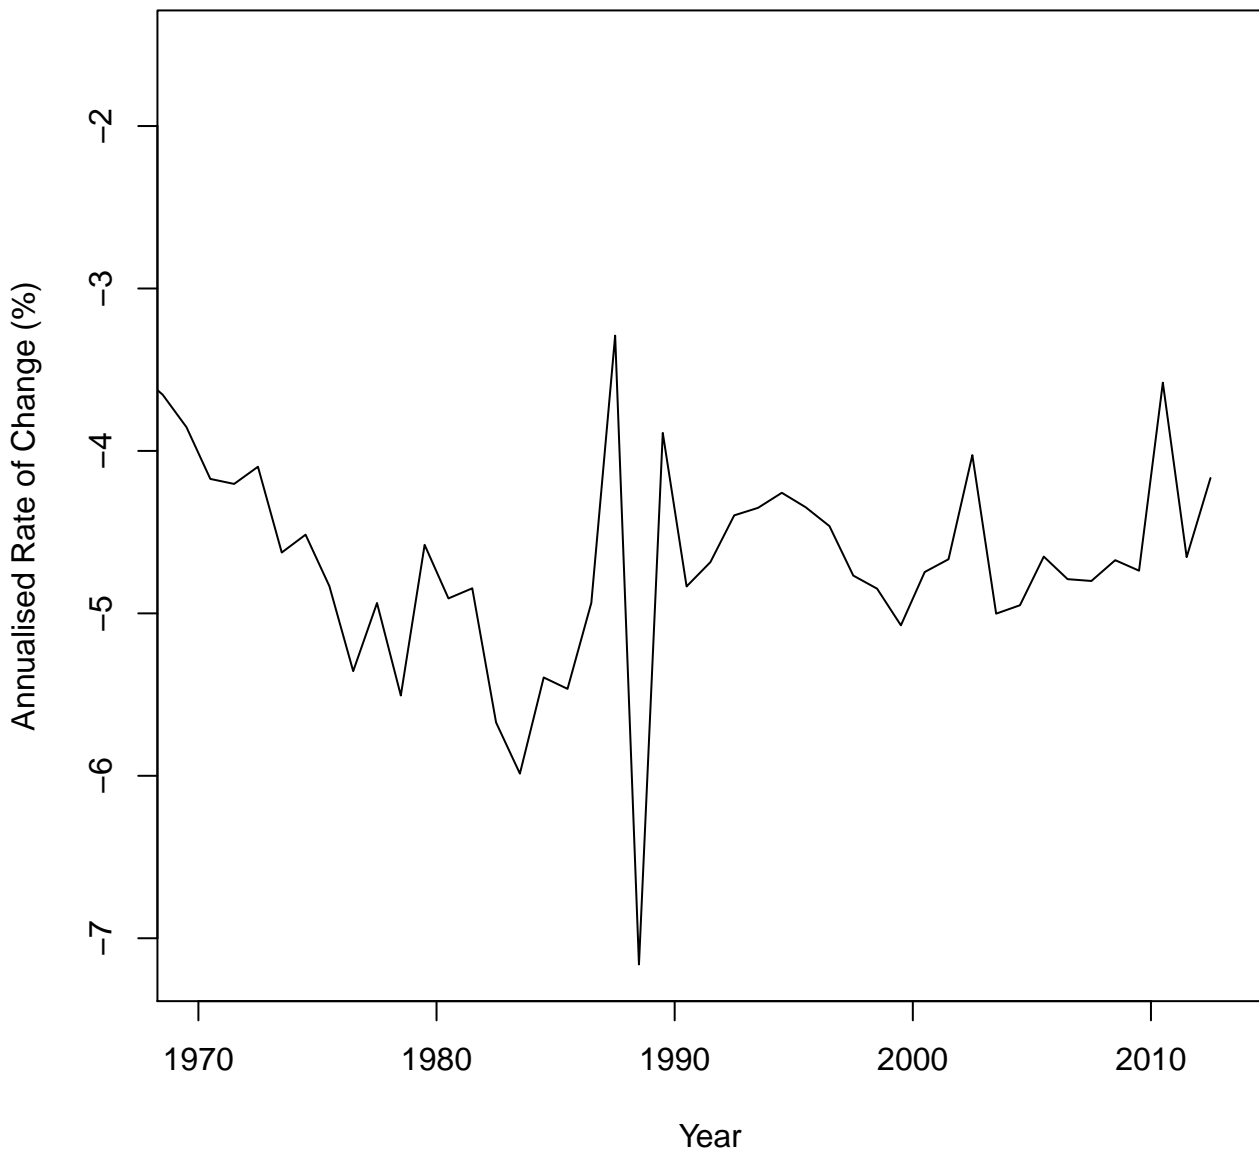



Rate of change in under-5 mortality rate: North America, High-income, 1970-2013

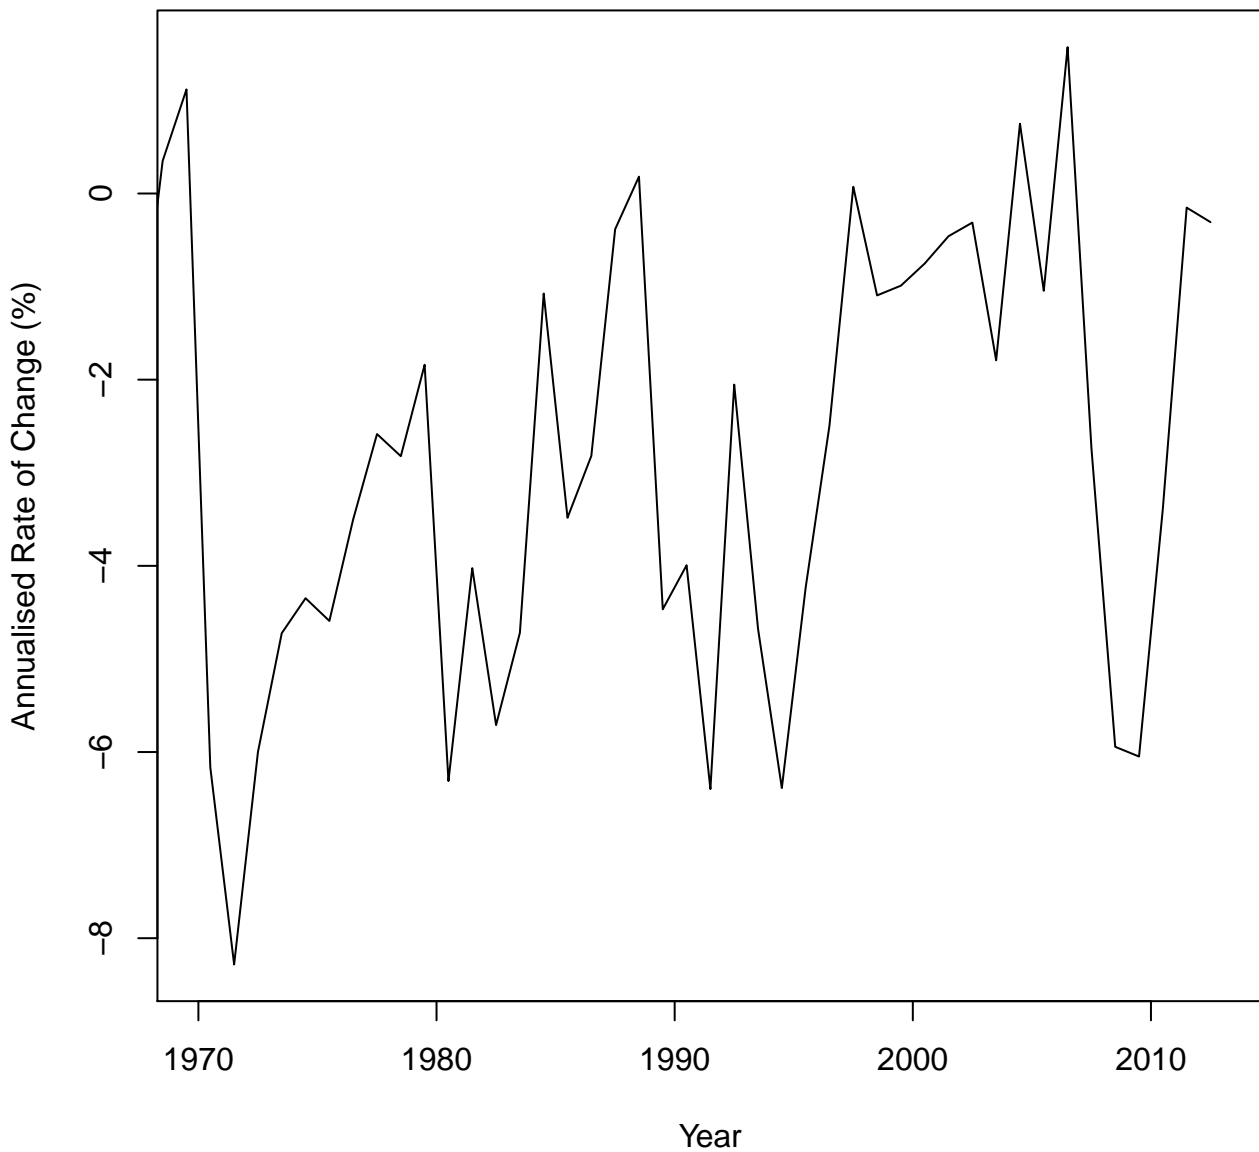

### Rate of change in under-5 mortality rate: Oceania, 1970-2013

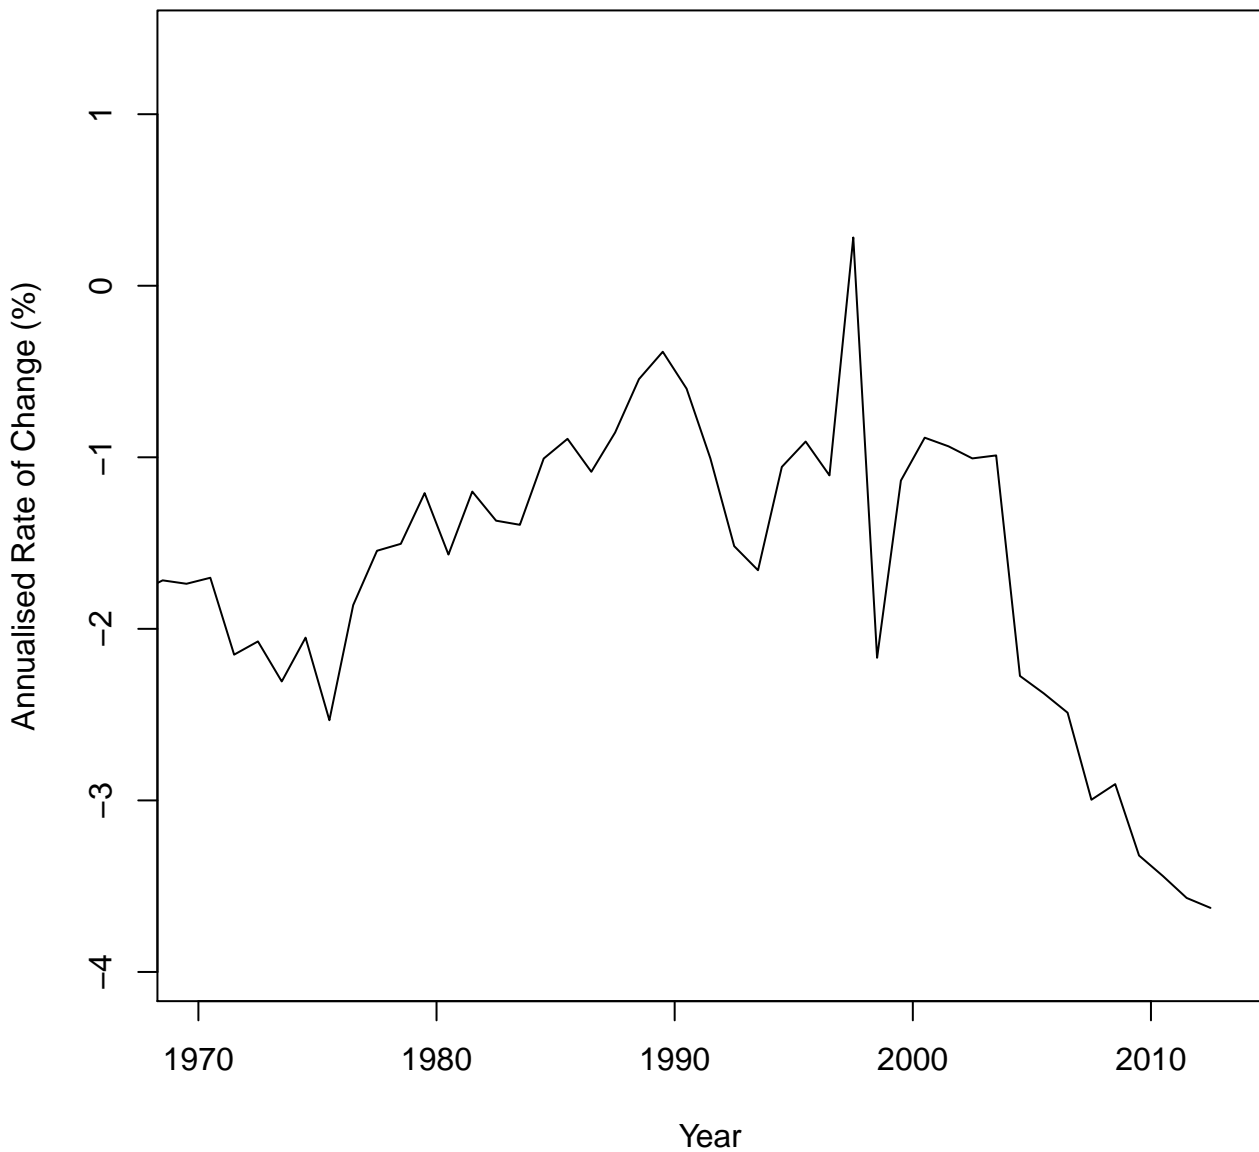

Rate of change in under-5 mortality rate: sub-Saharan Africa, Central, 1970-2013

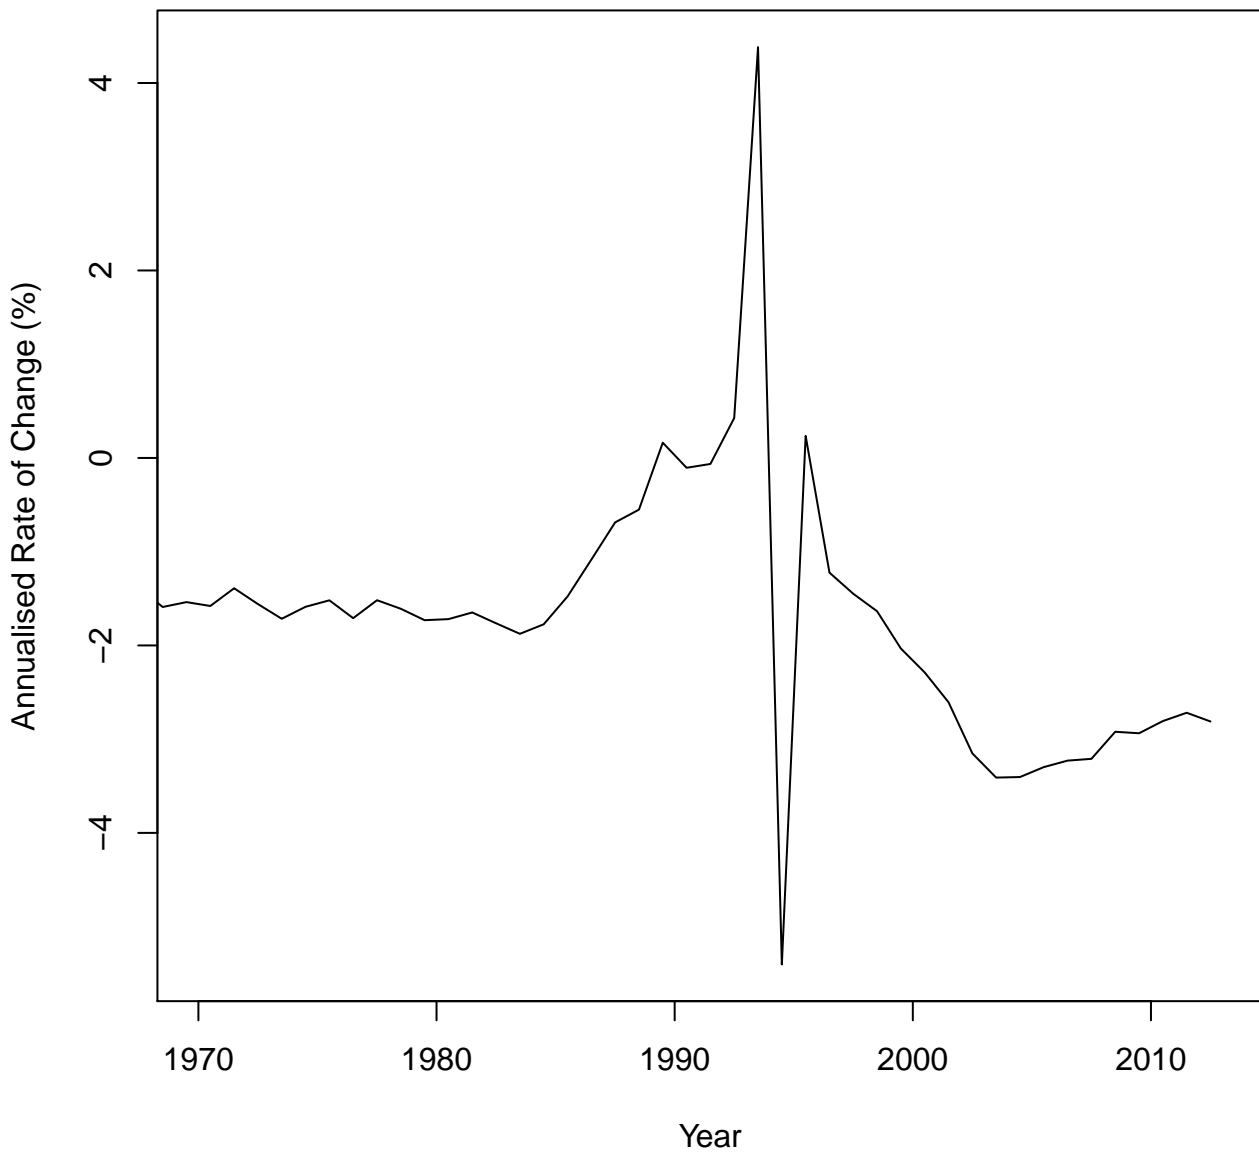

Rate of change in under-5 mortality rate: sub-Saharan Africa, Eastern, 1970-2013

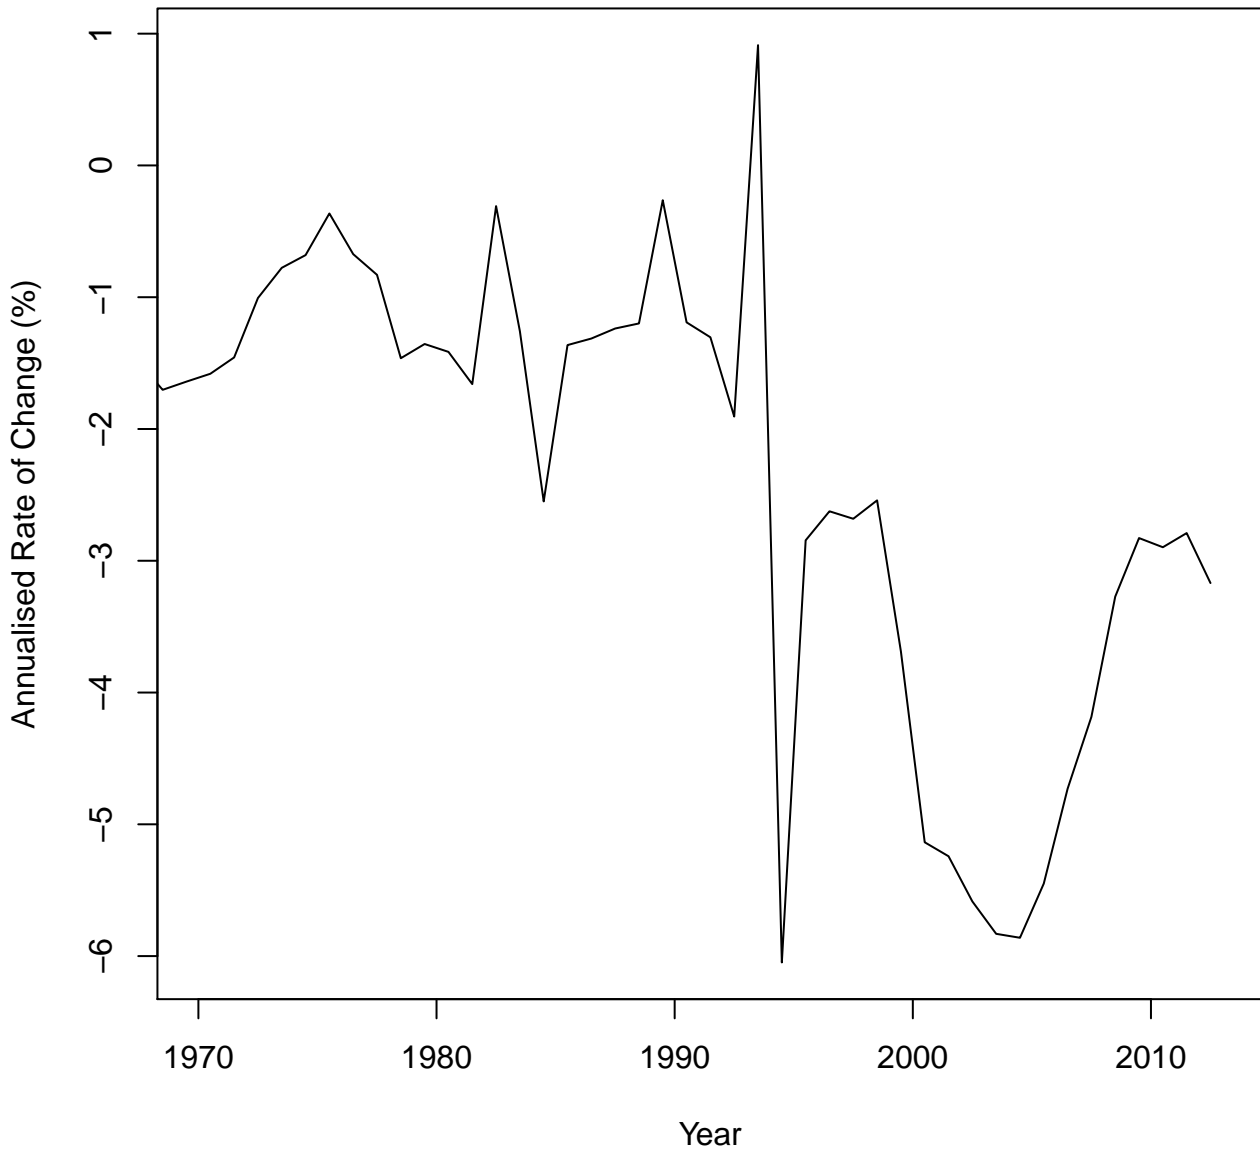

Rate of change in under-5 mortality rate: sub-Saharan Africa, Southern, 1970-2013

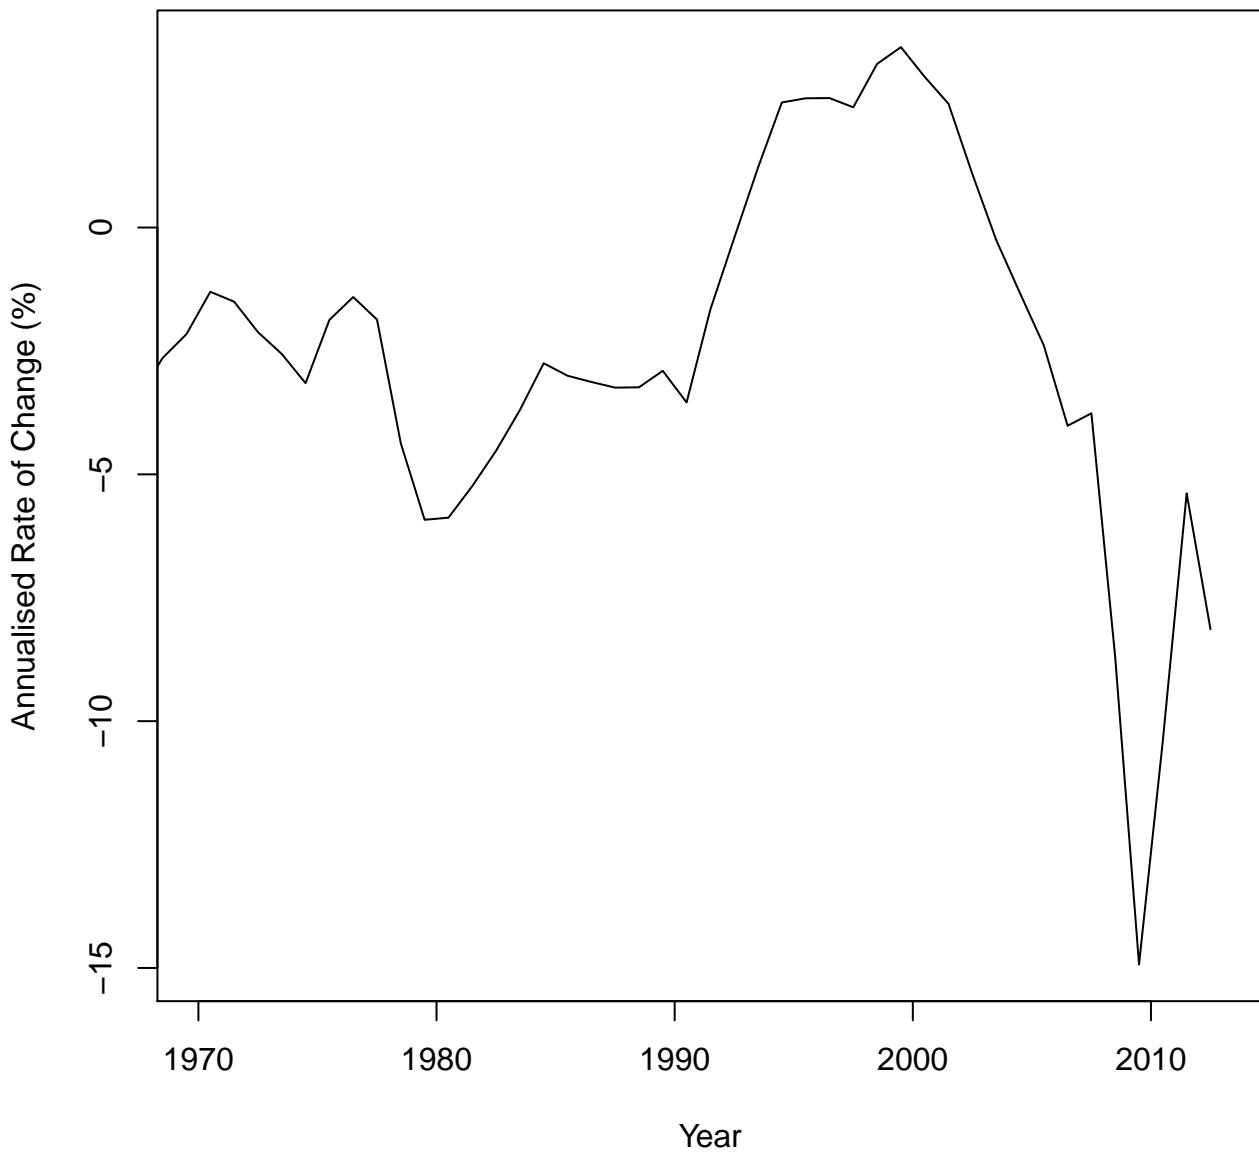

Rate of change in under-5 mortality rate: sub-Saharan Africa, Western, 1970-2013

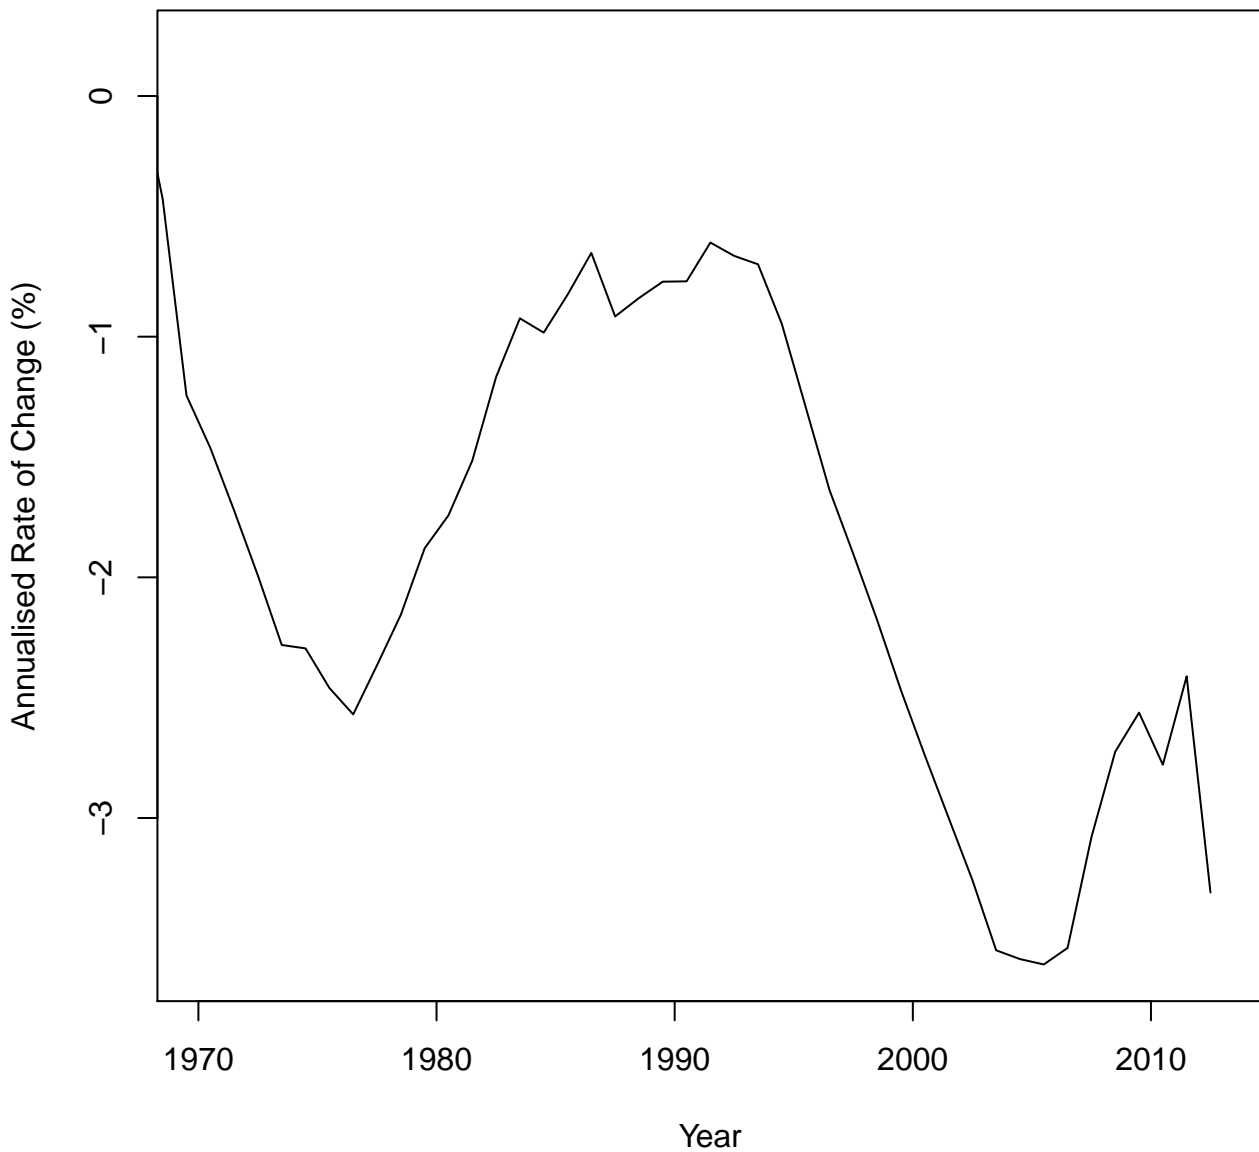

Supplement: NIHMS60026-supplement-Supplementary_information.pdf [file NIHMS60026-supplement-Supplementary_information.pdf]
